# Supplementary material for: Mikan Genome Database (MiGD): integrated database of genome annotation, genomic diversity, and CAPS marker information for mandarin molecular breeding
Source: PubMed Central journal article supplement — Breed Sci. 2020 Mar 5;70(2):200–11. doi: 10.1270/jsbbs.19097 (PMC7272249; doi:10.1270/jsbbs.19097), 2020-03-05
Supplement: 70_200_s7.pdf [file 70_200_s7.pdf]

Supplemental Table 6. Mandarin (*C. Clementina* and *C. unshui*) specific gene groups and annotation

| ID        | Num. in <i>C. Clementina</i> | Num in <i>C. unshui</i> | Num in <i>Parfolata</i> | Note                                                                                                                | GO                                                                                                                                                                                                                                          | InterPro                                                                                                                                                                                                                                                                                                                                                                                                                                                                                | Members in <i>C. Clementina</i>                                                                                                                                                                                                                                                                                                                                                                                                               | Members in <i>C. unshui</i>                                                                                                                                                                                                                                                                                            | Members in <i>Parfolata</i> |
|-----------|------------------------------|-------------------------|-------------------------|---------------------------------------------------------------------------------------------------------------------|---------------------------------------------------------------------------------------------------------------------------------------------------------------------------------------------------------------------------------------------|-----------------------------------------------------------------------------------------------------------------------------------------------------------------------------------------------------------------------------------------------------------------------------------------------------------------------------------------------------------------------------------------------------------------------------------------------------------------------------------------|-----------------------------------------------------------------------------------------------------------------------------------------------------------------------------------------------------------------------------------------------------------------------------------------------------------------------------------------------------------------------------------------------------------------------------------------------|------------------------------------------------------------------------------------------------------------------------------------------------------------------------------------------------------------------------------------------------------------------------------------------------------------------------|-----------------------------|
| GF0000019 | 21                           | 10                      | 0                       | Hypothetical protein (31)                                                                                           |                                                                                                                                                                                                                                             |                                                                                                                                                                                                                                                                                                                                                                                                                                                                                         | scaffold_1_mRNA_511.1.scaffold_3_mRNA_14.1.scaffold_3_mRNA_1514.1.scaffold_3_mRNA_220.1.scaffold_3_mRNA_3574.1.scaffold_3_mRNA_3785.1.scaffold_3_mRNA_7601.1.scaffold_5_mRNA_3887.1.scaffold_5_mRNA_4369.1.scaffold_5_mRNA_4932.1.scaffold_6_mRNA_1884.1.scaffold_7_mRNA_1036.1.scaffold_7_mRNA_1928.1.scaffold_7_mRNA_4601.1.scaffold_7_mRNA_101.1.scaffold_7_mRNA_864.1.scaffold_8_mRNA_3093.1.scaffold_9_mRNA_229.1.scaffold_9_mRNA_3409.1 | C.unshui_00008_mRNA_15.1.C.unshui_00141_mRNA_48.1.C.unshui_00141_mRNA_48.1.C.unshui_00185_mRNA_9.1.C.unshui_00217_mRNA_43.1.C.unshui_00514_mRNA_15.1.C.unshui_00527_mRNA_1928.1.scaffold_7_mRNA_4601.1.scaffold_7_mRNA_101.1.scaffold_7_mRNA_864.1.scaffold_8_mRNA_3093.1.scaffold_9_mRNA_229.1.scaffold_9_mRNA_3409.1 |                             |
| GF0000066 | 12                           | 7                       | 0                       | Hypothetical protein (19)                                                                                           | nucleic acid binding [GO:0003676 molecular_function] (10); zinc ion binding [GO:0008270 molecular_function] (10); proteolysis [GO:0006508 biological_process] (7); aspartic-type endopeptidase activity [GO:0004190 molecular_function] (7) | Zinc finger, CCHC-type [IPRO01878] (10); Peptidase A2A, retrovirus, catalytic [IPRO1995] (7); Viral movement protein [IPRO28919] (6); Aspartic peptidase domain [IPRO2109] (reverse); transcriptase domain [IPRO00477] (5); Retropepsins [IPRO18061] (1)                                                                                                                                                                                                                                | scaffold_1_mRNA_1502.1.scaffold_2_mRNA_324.1.scaffold_6_mRNA_441.1.scaffold_6_mRNA_530.1.scaffold_6_mRNA_635.1.scaffold_8_mRNA_1564.1.scaffold_8_mRNA_1587.1.scaffold_8_mRNA_1595.1.scaffold_8_mRNA_1635.1.scaffold_8_mRNA_1691.1.scaffold_9_mRNA_229.1.scaffold_9_mRNA_1036.1.scaffold_9_mRNA_963.1.scaffold_9_mRNA_1756.1.scaffold_9_mRNA_3222.1.scaffold_9_mRNA_4688.1.scaffold_9_mRNA_290.1.scaffold_9_mRNA_604.1.scaffold_9_mRNA_1698.1  | C.unshui_00128_mRNA_34.1.C.unshui_00219_mRNA_101.1.C.unshui_00219_mRNA_101.1.C.unshui_00538_mRNA_13.1.C.unshui_00538_mRNA_13.1.C.unshui_01919_mRNA_13.1.C.unshui_01919_mRNA_13.1.C.unshui_01919_mRNA_13.1.C.unshui_01919_mRNA_13.1                                                                                     |                             |
| GF0000242 | 10                           | 1                       | 0                       | Hypothetical protein (11)                                                                                           |                                                                                                                                                                                                                                             |                                                                                                                                                                                                                                                                                                                                                                                                                                                                                         | scaffold_1_mRNA_1036.1.scaffold_1_mRNA_963.1.scaffold_2_mRNA_2490.1.scaffold_3_mRNA_1756.1.scaffold_3_mRNA_3222.1.scaffold_3_mRNA_4688.1.scaffold_6_mRNA_290.1.scaffold_6_mRNA_604.1.scaffold_7_mRNA_1891.1.scaffold_9_mRNA_1698.1                                                                                                                                                                                                            | C.unshui_00170_mRNA_44.1                                                                                                                                                                                                                                                                                               |                             |
| GF0000111 | 10                           | 6                       | 0                       | Hypothetical protein (16)                                                                                           |                                                                                                                                                                                                                                             |                                                                                                                                                                                                                                                                                                                                                                                                                                                                                         | scaffold_4_mRNA_1603.1.scaffold_4_mRNA_1606.1.scaffold_5_mRNA_3949.1.scaffold_5_mRNA_3954.1.scaffold_6_mRNA_669.1.scaffold_7_mRNA_1910.1.scaffold_7_mRNA_1431.1.scaffold_9_mRNA_3174.1.scaffold_9_mRNA_3321.1                                                                                                                                                                                                                                 | C.unshui_00041_mRNA_39.1.C.unshui_00298_mRNA_32.1.C.unshui_00447_mRNA_3.1.C.unshui_00582_mRNA_5.1.C.unshui_02743_mRNA_3.1                                                                                                                                                                                              |                             |
| GF0000477 | 8                            | 1                       | 0                       | Hypothetical protein (9)                                                                                            |                                                                                                                                                                                                                                             |                                                                                                                                                                                                                                                                                                                                                                                                                                                                                         | scaffold_2_mRNA_958.1.scaffold_3_mRNA_12.1.scaffold_3_mRNA_3572.1.scaffold_5_mRNA_4934.1.scaffold_6_mRNA_170.1.scaffold_7_mRNA_2644.1.scaffold_8_mRNA_1523.1.scaffold_9_mRNA_2176.1                                                                                                                                                                                                                                                           | C.unshui_00627_mRNA_1.1                                                                                                                                                                                                                                                                                                |                             |
| GF0000499 | 7                            | 2                       | 0                       | Hypothetical protein (9)                                                                                            |                                                                                                                                                                                                                                             |                                                                                                                                                                                                                                                                                                                                                                                                                                                                                         | scaffold_3_mRNA_3570.1.scaffold_4_mRNA_756.1.scaffold_5_mRNA_4367.1.scaffold_5_mRNA_486.1.scaffold_5_mRNA_4935.1.scaffold_7_mRNA_1535.1.scaffold_8_mRNA_3091.1                                                                                                                                                                                                                                                                                | C.unshui_00404_mRNA_12.1.C.unshui_01313_mRNA_7.1                                                                                                                                                                                                                                                                       |                             |
| GF0000387 | 7                            | 3                       | 0                       | Hypothetical protein (9); Monosaccharide transport protein (1)                                                      | DNA binding [GO:0003677 molecular_function] (1)                                                                                                                                                                                             | Myb-like domain [IPRO17877] (1); Homobox domain-like [IPRO09057] (1)                                                                                                                                                                                                                                                                                                                                                                                                                    | scaffold_5_mRNA_2779.1.scaffold_5_mRNA_2857.1.scaffold_5_mRNA_438.1.scaffold_8_mRNA_480.1.scaffold_8_mRNA_957.1.scaffold_9_mRNA_1498.1.scaffold_9_mRNA_3365.1                                                                                                                                                                                                                                                                                 | C.unshui_00004_mRNA_3.1.C.unshui_00271_mRNA_7.1.C.unshui_00378_mRNA_20.1                                                                                                                                                                                                                                               |                             |
| GF0000275 | 6                            | 5                       | 0                       | Hypothetical protein (11)                                                                                           |                                                                                                                                                                                                                                             |                                                                                                                                                                                                                                                                                                                                                                                                                                                                                         | scaffold_3_mRNA_1363.1.scaffold_3_mRNA_5073.1.scaffold_5_mRNA_1401.1.scaffold_5_mRNA_3344.1.scaffold_6_mRNA_1789.1.scaffold_9_mRNA_2959.1                                                                                                                                                                                                                                                                                                     | C.unshui_00137_mRNA_4.1.C.unshui_00760_mRNA_4.1.C.unshui_01260_mRNA_2.1.C.unshui_01382_mRNA_2.1.C.unshui_02154_mRNA_2.1                                                                                                                                                                                                |                             |
| GF0000949 | 5                            | 2                       | 0                       | Retrotransposon protein, putative, Ty1-0 copia subclass (6); Cysteine-rich RLK (RECEPTOR-like protein kinase) 8 (1) | nucleic acid binding [GO:0003676 molecular_function] (5); zinc ion binding [GO:0008270 molecular_function] (4); DNA integration [GO:0015074 biological_process] (4)                                                                         | Reverse transcriptase, RNA-dependent DNA polymerase [IPRO13103] (7); Ribonuclease H-like domain [IPRO1878] (6); Integrase, catalytic core [IPRO1584] (4); Zinc finger, CCHC-type [IPRO01878] (4); GAG-pre-integrase domain [IPRO25724] (3); Viral movement protein [IPRO28919] (1)                                                                                                                                                                                                      | scaffold_4_mRNA_1134.1.scaffold_5_mRNA_1957.1.scaffold_6_mRNA_1003.1.scaffold_8_mRNA_1396.1.scaffold_8_mRNA_1625.1                                                                                                                                                                                                                                                                                                                            | C.unshui_00223_mRNA_5.1.C.unshui_00413_mRNA_4.1                                                                                                                                                                                                                                                                        |                             |
| GF0000805 | 5                            | 2                       | 0                       | Monosaccharide transport protein (7)                                                                                |                                                                                                                                                                                                                                             |                                                                                                                                                                                                                                                                                                                                                                                                                                                                                         | scaffold_1_mRNA_306.1.scaffold_5_mRNA_1301.1.scaffold_5_mRNA_2602.1.scaffold_8_mRNA_472.1.scaffold_9_mRNA_3209.1                                                                                                                                                                                                                                                                                                                              | C.unshui_00233_mRNA_12.1.C.unshui_00800_mRNA_3.1                                                                                                                                                                                                                                                                       |                             |
| GF0000784 | 5                            | 2                       | 0                       | Retrotransposon protein, putative, Ty1-0 copia subclass (6); Putative retroelement pol polyprotein (1)              | nucleic acid binding [GO:0003676 molecular_function] (6); zinc ion binding [GO:0008270 molecular_function] (6); DNA integration [GO:0015074 biological_process] (3)                                                                         | GAG-pre-integrase domain [IPRO25724] (6); Zinc finger, CCHC-type [IPRO1878] (6); Reverse transcriptase, RNA-dependent DNA polymerase [IPRO13103] (4); Ribonuclease H-like domain [IPRO12337] (4); Integrase, catalytic core [IPRO1584] (3)                                                                                                                                                                                                                                              | scaffold_1_mRNA_1631.1.scaffold_4_mRNA_1135.1.scaffold_5_mRNA_3554.1.scaffold_9_mRNA_1737.1.scaffold_9_mRNA_2941.1                                                                                                                                                                                                                                                                                                                            | C.unshui_00424_mRNA_4.1.C.unshui_00434_mRNA_24.1                                                                                                                                                                                                                                                                       |                             |
| GF0000326 | 5                            | 5                       | 0                       | Hypothetical protein (10)                                                                                           |                                                                                                                                                                                                                                             |                                                                                                                                                                                                                                                                                                                                                                                                                                                                                         | scaffold_2_mRNA_172.1.scaffold_3_mRNA_2036.1.scaffold_3_mRNA_4464.1.scaffold_4_mRNA_1996.1.scaffold_5_mRNA_601.1                                                                                                                                                                                                                                                                                                                              | C.unshui_00361_mRNA_9.1.C.unshui_02358_mRNA_3.1.C.unshui_02458_mRNA_1.1                                                                                                                                                                                                                                                |                             |
| GF0002260 | 4                            | 1                       | 0                       | Hypothetical protein (5)                                                                                            |                                                                                                                                                                                                                                             |                                                                                                                                                                                                                                                                                                                                                                                                                                                                                         | scaffold_5_mRNA_2696.1.scaffold_6_mRNA_2058.1.scaffold_6_mRNA_2059.1                                                                                                                                                                                                                                                                                                                                                                          | C.unshui_01636_mRNA_5.1                                                                                                                                                                                                                                                                                                |                             |
| GF0001952 | 4                            | 1                       | 0                       | Hypothetical protein (5)                                                                                            |                                                                                                                                                                                                                                             |                                                                                                                                                                                                                                                                                                                                                                                                                                                                                         | scaffold_6_mRNA_319.1                                                                                                                                                                                                                                                                                                                                                                                                                         |                                                                                                                                                                                                                                                                                                                        |                             |
| GF0001907 | 4                            | 1                       | 0                       | Putative retroelement pol polyprotein (4); Hydrolyase activity [GO:0016787 molecular_function] (1)                  |                                                                                                                                                                                                                                             |                                                                                                                                                                                                                                                                                                                                                                                                                                                                                         | scaffold_2_mRNA_839.1.scaffold_3_mRNA_3305.1.scaffold_5_mRNA_1156.1                                                                                                                                                                                                                                                                                                                                                                           | C.unshui_00066_mRNA_20.1                                                                                                                                                                                                                                                                                               |                             |
| GF0001883 | 4                            | 1                       | 0                       | Hypothetical protein (5)                                                                                            |                                                                                                                                                                                                                                             |                                                                                                                                                                                                                                                                                                                                                                                                                                                                                         | scaffold_8_mRNA_2127.1                                                                                                                                                                                                                                                                                                                                                                                                                        |                                                                                                                                                                                                                                                                                                                        |                             |
| GF0001765 | 4                            | 1                       | 0                       | Gag protease polyprotein (3); Cellular nucleic acid-binding protein (1); DNARNA polymerases superfamily protein (1) | nucleic acid binding [GO:0003676 molecular_function] (4); protein dimerization activity [GO:0046983 molecular_function] (4); DNA binding [GO:0003677 molecular_function] (4)                                                                | Pectinacetylesterase/NOTUM [IPRO04963] (1)                                                                                                                                                                                                                                                                                                                                                                                                                                              | scaffold_2_mRNA_3057.1.scaffold_3_mRNA_3146.1.scaffold_5_mRNA_3216.1                                                                                                                                                                                                                                                                                                                                                                          | C.unshui_00003_mRNA_1.1                                                                                                                                                                                                                                                                                                |                             |
| GF0001444 | 4                            | 2                       | 0                       | Orf764 protein (6)                                                                                                  | DNA integration [GO:0015074 biological_process] (6); nucleic acid binding [GO:0003676 molecular_function] (6); RNA-DNA hybrid ribonuclease activity [GO:0044523 molecular_function] (4)                                                     | Ribonuclease H-like domain [IPRO12337] (6); Integrase, catalytic core [IPRO1584] (6); Ribonuclease H domain [IPRO12156] (4); Retrotransposon gag domain [IPRO6162] (1)                                                                                                                                                                                                                                                                                                                  | scaffold_4_mRNA_1666.1.scaffold_5_mRNA_1151.1.scaffold_7_mRNA_1363.1.scaffold_7_mRNA_2242.1                                                                                                                                                                                                                                                                                                                                                   | C.unshui_00140_mRNA_28.1.C.unshui_00716_mRNA_14.1                                                                                                                                                                                                                                                                      |                             |
| GF0001186 | 4                            | 2                       | 0                       | Putative retroelement pol polyprotein (6)                                                                           |                                                                                                                                                                                                                                             |                                                                                                                                                                                                                                                                                                                                                                                                                                                                                         | scaffold_1_mRNA_751.1.scaffold_2_mRNA_661.1.scaffold_3_mRNA_705.1.scaffold_5_mRNA_615.1                                                                                                                                                                                                                                                                                                                                                       | C.unshui_00947_mRNA_4.1.C.unshui_01928_mRNA_5.1                                                                                                                                                                                                                                                                        |                             |
| GF0000142 | 4                            | 10                      | 0                       | Hypothetical protein (14)                                                                                           |                                                                                                                                                                                                                                             |                                                                                                                                                                                                                                                                                                                                                                                                                                                                                         | scaffold_2_mRNA_2854.1.scaffold_2_mRNA_2960.1.scaffold_6_mRNA_310.1.scaffold_8_mRNA_1550.1                                                                                                                                                                                                                                                                                                                                                    | C.unshui_00124_mRNA_19.1.C.unshui_00215_mRNA_2.1.C.unshui_00406_mRNA_9.1.C.unshui_00556_mRNA_19.1.C.unshui_00722_mRNA_10.1.C.unshui_01049_mRNA_5.1.C.unshui_01704_mRNA_1.1.C.unshui_01716_mRNA_1.1.C.unshui_02577_mRNA_3.1.C.unshui_02711_mRNA_1.1                                                                     |                             |
| GF0004477 | 3                            | 1                       | 0                       | Eukaryotic translation initiation factor 3 subunit, putative (2); Hypothetical protein (2)                          | protein binding [GO:0005515 molecular_function] (4)                                                                                                                                                                                         | tetratricopeptide-like helix domain [IPRO11990] (4); Tetratricopeptide repeat [IPRO19734] (4); Tetratricopeptide repeat-containing domain [IPRO13026] (4); CLU central domain [IPRO33646] (3); Winged helix-helix DNA-binding domain [IPRO11011] (2); Ribonuclease H-like domain [IPRO12337] (4); hAT-like transposase, RNase-H fold [IPRO25525] (4); HAT, C-terminal dimerisation domain [IPRO08906] (3); Zinc finger, BED-type [IPRO13658] (3); Zinc finger C2H2-type [IPRO13087] (2) | scaffold_7_mRNA_1733.1.scaffold_7_mRNA_1742.1.scaffold_7_mRNA_1759.1                                                                                                                                                                                                                                                                                                                                                                          | C.unshui_00766_mRNA_2.1                                                                                                                                                                                                                                                                                                |                             |
| GF0004380 | 3                            | 1                       | 0                       | BED zinc finger/hAT family dimerization domain isoform 1 (4)                                                        | nucleic acid binding [GO:0003676 molecular_function] (4); protein dimerization activity [GO:0046983 molecular_function] (4); DNA binding [GO:0003677 molecular_function] (4)                                                                | Ribonuclease H-like domain [IPRO12337] (4); hAT-like transposase, RNase-H fold [IPRO25525] (4); HAT, C-terminal dimerisation domain [IPRO08906] (3); Zinc finger, BED-type [IPRO13658] (3); Zinc finger C2H2-type [IPRO13087] (2)                                                                                                                                                                                                                                                       | scaffold_6_mRNA_388.1.scaffold_8_mRNA_2483.1.scaffold_9_mRNA_1810.1                                                                                                                                                                                                                                                                                                                                                                           | C.unshui_00474_mRNA_21.1                                                                                                                                                                                                                                                                                               |                             |
| GF0003948 | 3                            | 1                       | 0                       | Hypothetical protein (4)                                                                                            |                                                                                                                                                                                                                                             |                                                                                                                                                                                                                                                                                                                                                                                                                                                                                         | scaffold_5_mRNA_2044.1.scaffold_5_mRNA_2064.1.scaffold_6_mRNA_573.1                                                                                                                                                                                                                                                                                                                                                                           | C.unshui_00691_mRNA_1.1                                                                                                                                                                                                                                                                                                |                             |
| GF0003941 | 3                            | 1                       | 0                       | Hypothetical protein (4)                                                                                            |                                                                                                                                                                                                                                             |                                                                                                                                                                                                                                                                                                                                                                                                                                                                                         | scaffold_5_mRNA_1968.1.scaffold_5_mRNA_1971.1.scaffold_5_mRNA_583.1                                                                                                                                                                                                                                                                                                                                                                           | C.unshui_00358_mRNA_1.1                                                                                                                                                                                                                                                                                                |                             |
| GF0003728 | 3                            | 1                       | 0                       | Hypothetical protein (4)                                                                                            | protein tyrosine phosphatase activity [GO:0004725 molecular_function] (2); dephosphorylation [GO:0016311 biological_process] (2); phosphatase activity [GO:0016791 molecular_function] (2)                                                  | Myotubularin-like phosphatase domain [IPRO10569] (4); Myotubularin family [IPRO30564] (4); Protein-tyrosine phosphatase-like [IPRO29011] (4); Protein-tyrosine phosphatase, active site [IPRO16130] (2)                                                                                                                                                                                                                                                                                 | scaffold_4_mRNA_1269.1.scaffold_4_mRNA_1276.1.scaffold_4_mRNA_1283.1                                                                                                                                                                                                                                                                                                                                                                          | C.unshui_02303_mRNA_3.1                                                                                                                                                                                                                                                                                                |                             |
| GF0003724 | 3                            | 1                       | 0                       | Hypothetical protein (4)                                                                                            | nucleic acid binding [GO:0003676 molecular_function] (4); zinc ion binding [GO:0008270 molecular_function] (4); proteolysis [GO:0006508 biological_process] (3); aspartic-type endopeptidase activity [GO:0004190 molecular_function] (3)   | Zinc finger, CCHC-type [IPRO01878] (4); Viral movement protein [IPRO28919] (3); Reverse transcriptase domain [IPRO00477] (3); Retropepsins [IPRO18061] (3); Aspartic peptidase, active site [IPRO01969] (3); Aspartic peptidase domain [IPRO2109] (3)                                                                                                                                                                                                                                   | scaffold_4_mRNA_1218.1.scaffold_6_mRNA_305.1.scaffold_9_mRNA_1317.1                                                                                                                                                                                                                                                                                                                                                                           | C.unshui_00618_mRNA_28.1                                                                                                                                                                                                                                                                                               |                             |
| GF0003412 | 3                            | 1                       | 0                       | Hypothetical protein (4)                                                                                            |                                                                                                                                                                                                                                             |                                                                                                                                                                                                                                                                                                                                                                                                                                                                                         | scaffold_3_mRNA_3633.1.scaffold_4_mRNA_896.1.scaffold_8_mRNA_1143.1                                                                                                                                                                                                                                                                                                                                                                           | C.unshui_00682_mRNA_19.1                                                                                                                                                                                                                                                                                               |                             |
| GF0002883 | 3                            | 1                       | 0                       | Hypothetical protein (4)                                                                                            |                                                                                                                                                                                                                                             |                                                                                                                                                                                                                                                                                                                                                                                                                                                                                         | scaffold_1_mRNA_791.1.scaffold_6_mRNA_1581.1.scaffold_9_mRNA_2956.1                                                                                                                                                                                                                                                                                                                                                                           | C.unshui_00924_mRNA_12.1                                                                                                                                                                                                                                                                                               |                             |
| GF0002882 | 3                            | 1                       | 0                       | Hypothetical protein (4)                                                                                            |                                                                                                                                                                                                                                             |                                                                                                                                                                                                                                                                                                                                                                                                                                                                                         | scaffold_1_mRNA_786.1.scaffold_1_mRNA_792.1.scaffold_3_mRNA_882.1                                                                                                                                                                                                                                                                                                                                                                             | C.unshui_01463_mRNA_9.1                                                                                                                                                                                                                                                                                                |                             |

| ID         | Num. in <i>C. caryophyllata</i> | Num. in <i>C. acanthina</i> | Num. in <i>P. trifoliata</i> | Note                                                                                                                                                                                                                        | GO                                                                                                                                                                                                                                        | InterPro                                                                                                                                                                                                                                                                                                                                                                                                                                                                            | Members in <i>C. caryophyllata</i>                                                                                                      | Members in <i>C. acanthina</i>                                                                | Members in <i>P. trifoliata</i> |
|------------|---------------------------------|-----------------------------|------------------------------|-----------------------------------------------------------------------------------------------------------------------------------------------------------------------------------------------------------------------------|-------------------------------------------------------------------------------------------------------------------------------------------------------------------------------------------------------------------------------------------|-------------------------------------------------------------------------------------------------------------------------------------------------------------------------------------------------------------------------------------------------------------------------------------------------------------------------------------------------------------------------------------------------------------------------------------------------------------------------------------|-----------------------------------------------------------------------------------------------------------------------------------------|-----------------------------------------------------------------------------------------------|---------------------------------|
| GF0002863  | 3                               | 1                           | 0                            | Hypothetical protein (4)                                                                                                                                                                                                    |                                                                                                                                                                                                                                           |                                                                                                                                                                                                                                                                                                                                                                                                                                                                                     | scaffold_1_mRNA_551.1.scaffold_2_mRNA_2598.1.scaffold_9_mRNA_2646.1.scaffold_1_mRNA_192.1.scaffold_4_mRNA_2570.1.scaffold_4_mRNA_2572.1 | C_unshu_00131_mRNA_14.1                                                                       | -                               |
| GF0002740  | 3                               | 1                           | 0                            | Hypothetical protein (4)                                                                                                                                                                                                    |                                                                                                                                                                                                                                           |                                                                                                                                                                                                                                                                                                                                                                                                                                                                                     |                                                                                                                                         | C_unshu_01598_mRNA_2.1                                                                        | -                               |
| GF0002733  | 3                               | 1                           | 0                            | Copia protein (2); Opic3 polyploid protein (1); Osi90 protein (1)                                                                                                                                                           | DNA integration [GO:0015074 biological_process] (1); nucleic acid binding [GO:0003676 molecular_function] (1)                                                                                                                             | Reverse transcriptase, RNA-dependent DNA polymerase [IPRO13103] (4); Integrase, catalytic core [IPRO01584] (1); Ribonuclease H-like domain [IPRO12337] (1)                                                                                                                                                                                                                                                                                                                          | scaffold_1_mRNA_1787.1.scaffold_1_mRNA_2785.1.scaffold_5_mRNA_981.1                                                                     | C_unshu_00083_mRNA_36.1                                                                       | -                               |
| GF0002719  | 3                               | 1                           | 0                            | Mutator-like transposase (3); MuDR family transposase isoform 1 (1)                                                                                                                                                         | zinc ion binding [GO:0008270 molecular_function] (4); nucleic acid binding [GO:0003676 molecular_function] (2)                                                                                                                            | Transposase, MuDR, plant [IPRO04332] (4); MULE transposase domain [IPRO18289] (4); Zinc finger, PMZ-type [IPRO06584] (4); Zinc finger, SWIM-type [IPRO05272] (4); Zinc finger, CCHC-type [IPRO01878] (2)                                                                                                                                                                                                                                                                            | scaffold_1_mRNA_1535.1.scaffold_2_mRNA_3553.1.scaffold_8_mRNA_146.1                                                                     | C_unshu_00273_mRNA_31.1                                                                       | -                               |
| GF0002696  | 3                               | 1                           | 0                            | Hypothetical protein (4)                                                                                                                                                                                                    |                                                                                                                                                                                                                                           |                                                                                                                                                                                                                                                                                                                                                                                                                                                                                     | scaffold_1_mRNA_1206.1.scaffold_2_mRNA_2279.1.scaffold_3_mRNA_1790.1                                                                    | C_unshu_01671_mRNA_7.1                                                                        | -                               |
| GF0002524  | 3                               | 2                           | 0                            | Hypothetical protein (4); Putative polyprotein (Aspartic protease, reverse transcriptase, ribonuclease H) (1)                                                                                                               | aspartic-type endopeptidase activity [GO:0004190 molecular_function] (4); proteolysis [GO:0006508 biological_process] (4); zinc ion binding [GO:0008270 molecular_function] (1); nucleic acid binding [GO:0003676 molecular_function] (1) | Retransposons [IPRO18061] (4); Aspartic peptidase, active site [IPRO01969] (4); Aspartic peptidase domain [IPRO01109] (3); Zinc finger, CCHC-type [IPRO01878] (1); Reverse transcriptase domain [IPRO04977] (1)                                                                                                                                                                                                                                                                     | scaffold_8_mRNA_1934.1.scaffold_8_mRNA_1985.1.scaffold_9_mRNA_3760.1                                                                    | C_unshu_00469_mRNA_5.1.C_unshu_02183_mRNA_2.1                                                 | -                               |
| GF0002169  | 3                               | 2                           | 0                            | Hypothetical protein (5)                                                                                                                                                                                                    | zinc ion binding [GO:0008270 molecular_function] (4); nucleic acid binding [GO:0003676 molecular_function] (4)                                                                                                                            | Domain of unknown function DUF4283 [IPRO25585] (5); Zinc knuckle CX2CX4HX4C [IPRO25836] (5); Zinc finger, CCHC-type [IPRO01878] (4)                                                                                                                                                                                                                                                                                                                                                 | scaffold_4_mRNA_2241.1.scaffold_5_mRNA_2218.1.scaffold_5_mRNA_3752.1                                                                    | C_unshu_00028_mRNA_13.1.C_unshu_00178_mRNA_26.1                                               | -                               |
| GF0002138  | 3                               | 2                           | 0                            | Hypothetical protein (5)                                                                                                                                                                                                    |                                                                                                                                                                                                                                           |                                                                                                                                                                                                                                                                                                                                                                                                                                                                                     | scaffold_4_mRNA_1047.1.scaffold_4_mRNA_1246.1.scaffold_4_mRNA_1277.1                                                                    | C_unshu_00809_mRNA_6.1.C_unshu_03085_mRNA_1.1                                                 | -                               |
| GF0002109  | 3                               | 2                           | 0                            | Hypothetical protein (5)                                                                                                                                                                                                    |                                                                                                                                                                                                                                           |                                                                                                                                                                                                                                                                                                                                                                                                                                                                                     | scaffold_3_mRNA_5230.1.scaffold_8_mRNA_56.1.scaffold_9_mRNA_1503.1                                                                      | C_unshu_00787_mRNA_19.1.C_unshu_01396_mRNA_2.1                                                | -                               |
| GF0001919  | 3                               | 2                           | 0                            | Hypothetical protein (5)                                                                                                                                                                                                    | proteolysis [GO:0006508 biological_process] (5); cysteine-type peptidase activity [GO:0008234 molecular_function] (5)                                                                                                                     | Domain of unknown function DUF1985 [IPRO15410] (5); Ulp1 protease family, C-terminal catalytic domain [IPRO03653] (5)                                                                                                                                                                                                                                                                                                                                                               | scaffold_2_mRNA_3518.1.scaffold_3_mRNA_1454.1.scaffold_9_mRNA_3653.1                                                                    | C_unshu_00026_mRNA_32.1.C_unshu_00112_mRNA_5.1                                                | -                               |
| GF0001886  | 3                               | 2                           | 0                            | Hypothetical protein (5)                                                                                                                                                                                                    |                                                                                                                                                                                                                                           |                                                                                                                                                                                                                                                                                                                                                                                                                                                                                     | scaffold_2_mRNA_2433.1.scaffold_5_mRNA_2052.1.scaffold_9_mRNA_2300.1                                                                    | C_unshu_00118_mRNA_12.1.C_unshu_00145_mRNA_12.1                                               | -                               |
| GF0001838  | 3                               | 2                           | 0                            | Hypothetical protein (4); Disease resistance protein family (1)                                                                                                                                                             |                                                                                                                                                                                                                                           |                                                                                                                                                                                                                                                                                                                                                                                                                                                                                     | scaffold_2_mRNA_1189.1.scaffold_2_mRNA_3629.1.scaffold_7_mRNA_1631.1                                                                    | C_unshu_00870_mRNA_13.1.C_unshu_01092_mRNA_11.1                                               | -                               |
| GF0001748  | 3                               | 2                           | 0                            | Hypothetical protein (5)                                                                                                                                                                                                    |                                                                                                                                                                                                                                           |                                                                                                                                                                                                                                                                                                                                                                                                                                                                                     | scaffold_1_mRNA_1387.1.scaffold_1_mRNA_1412.1.scaffold_1_mRNA_1459.1                                                                    | C_unshu_00158_mRNA_9.1.C_unshu_00470_mRNA_27.1                                                | -                               |
| GF0001615  | 3                               | 3                           | 0                            | Disease resistance protein (3); Disease resistance protein RPS2 (1); LRR and NB-ARC domain-containing disease resistance protein, putative (1); NB-ARC domain-containing disease resistance protein, putative isoform 1 (1) | protein binding [GO:0005515 molecular_function] (6); ADP binding [GO:0043531 molecular_function] (5)                                                                                                                                      | Leucine-rich repeat domain, L domain-like [IPRO22675] (1); Viral movement protein [IPRO28919] (1); Leucine-rich repeat domain, L domain-like [IPRO23675] (6); Leucine-rich repeat [IPRO1611] (6); NB-ARC [IPRO02182] (5); P-loop containing nucleoside triphosphate hydrolase [IPRO27417] (5); Winged helix-turn-helix DNA-binding domain [IPRO11991] (1); Leucine-rich repeat, typical subtype [IPRO03591] (1); AAA+ ATPase domain [IPRO03593] (1)                                 | scaffold_7_mRNA_1896.1.scaffold_7_mRNA_1971.1.scaffold_7_mRNA_1976.1                                                                    | C_unshu_00050_mRNA_1.1.C_unshu_00245_mRNA_10.1.C_unshu_01710_mRNA_4.1                         | -                               |
| GF0001514  | 3                               | 3                           | 0                            | Disease resistance protein (3); Disease resistance protein (CC-NBS-LRR class) family protein (1); Putative disease resistance gene NBS-LRR family protein (1); Putative disease resistance protein (1)                      | ADP binding [GO:0043531 molecular_function] (6)                                                                                                                                                                                           | NB-ARC [IPRO02182] (6); P-loop containing nucleoside triphosphate hydrolase [IPRO27417] (6); Leucine-rich repeat domain, L domain-like [IPRO23675] (3); Winged helix-turn-helix DNA-binding domain [IPRO11991] (2); AAA+ ATPase domain [IPRO03593] (2)                                                                                                                                                                                                                              | scaffold_5_mRNA_2639.1.scaffold_5_mRNA_2653.1                                                                                           | C_unshu_00906_mRNA_7.1.C_unshu_01119_mRNA_1.1.C_unshu_01443_mRNA_1.1                          | -                               |
| GF0001482  | 3                               | 3                           | 0                            | Hypothetical protein (6)                                                                                                                                                                                                    |                                                                                                                                                                                                                                           |                                                                                                                                                                                                                                                                                                                                                                                                                                                                                     | scaffold_5_mRNA_1098.1.scaffold_8_mRNA_1428.1.scaffold_9_mRNA_3758.1                                                                    | C_unshu_00033_mRNA_38.1.C_unshu_00582_mRNA_6.1.C_unshu_00825_mRNA_4.1                         | -                               |
| GF0001298  | 3                               | 3                           | 0                            | Monosaccharide transport protein (6)                                                                                                                                                                                        |                                                                                                                                                                                                                                           |                                                                                                                                                                                                                                                                                                                                                                                                                                                                                     | scaffold_3_mRNA_1011.1.scaffold_8_mRNA_293.1.scaffold_9_mRNA_2930.1                                                                     | C_unshu_00068_mRNA_31.1.C_unshu_01467_mRNA_3.1.C_unshu_02089_mRNA_8.1                         | -                               |
| GF0001250  | 3                               | 3                           | 0                            | Hypothetical protein (6)                                                                                                                                                                                                    |                                                                                                                                                                                                                                           |                                                                                                                                                                                                                                                                                                                                                                                                                                                                                     | scaffold_2_mRNA_319.1.scaffold_9_mRNA_2268.1.scaffold_9_mRNA_2368.1                                                                     | C_unshu_00529_mRNA_21.1.C_unshu_01568_mRNA_01730_mRNA_5.1                                     | -                               |
| GF0001159  | 3                               | 3                           | 0                            | Hypothetical protein (6)                                                                                                                                                                                                    |                                                                                                                                                                                                                                           |                                                                                                                                                                                                                                                                                                                                                                                                                                                                                     | scaffold_1_mRNA_2556.1.scaffold_3_mRNA_1508.1.scaffold_4_mRNA_2110.1                                                                    | C_unshu_00017_mRNA_29.1.C_unshu_00224_mRNA_14.1.C_unshu_02217_mRNA_4.1                        | -                               |
| GF0000616  | 3                               | 5                           | 0                            | Hypothetical protein (8)                                                                                                                                                                                                    |                                                                                                                                                                                                                                           |                                                                                                                                                                                                                                                                                                                                                                                                                                                                                     | scaffold_2_mRNA_2287.1.scaffold_5_mRNA_2471.1.scaffold_6_mRNA_195.1                                                                     | C_unshu_00138_mRNA_65.1.C_unshu_00377_mRNA_2.1.C_unshu_00892_mRNA_17.1.C_unshu_00871_mRNA_5.1 | -                               |
| GF00018573 | 2                               | 1                           | 0                            | Hypothetical protein (3)                                                                                                                                                                                                    | nucleic acid binding [GO:0003676 molecular_function] (2); oxidoreductase activity [GO:0016491 molecular_function] (1); oxidation-reduction process [GO:0055114 biological_process] (1)                                                    | Non-haem dioxygenase N-terminal domain [IPRO05092] (2); Isopenicillin N synthase-like [IPRO27443] (2); Reverse transcriptase domain [IPRO04077] (2); Ribonuclease H-like domain [IPRO12337] (2); Oxyglutamate iron-dependent dioxygenase [IPRO05123] (1)                                                                                                                                                                                                                            | scaffold_9_mRNA_3284.1.scaffold_9_mRNA_3285.1                                                                                           | C_unshu_00741_mRNA_2.1                                                                        | -                               |
| GF00018556 | 2                               | 1                           | 0                            | LRR receptor-like kinase family protein 0 (2); CN3A clone J023022C01, full insert sequence (1)                                                                                                                              | protein phosphorylation [GO:0006468 biological_process] (3); protein kinase activity [GO:0004472 molecular_function] (3); ATP binding [GO:0005524 molecular_function] (3); protein binding [GO:0005515 molecular_function] (2)            | Protein kinase, ATP binding site [IPRO17441] (3); Tyrosine-protein kinase, active site [IPRO00266] (3); Protein kinase-like domain [IPRO11009] (3); Leucine-rich repeat domain, L domain-like [IPRO23675] (3); Protein kinase domain [IPRO00191] (3); Leucine-rich repeat [IPRO01611] (2); Leucine-rich repeat-containing N-terminal, plant-type [IPRO13210] (2); Leucine-rich repeat, typical subtype [IPRO03591] (2); Concanavalin A-like lectin/glucanase domain [IPRO13320] (1) | scaffold_9_mRNA_3252.1.scaffold_9_mRNA_3253.1                                                                                           | C_unshu_00095_mRNA_16.1                                                                       | -                               |
| GF00018304 | 2                               | 1                           | 0                            | Hypothetical protein (3)                                                                                                                                                                                                    |                                                                                                                                                                                                                                           |                                                                                                                                                                                                                                                                                                                                                                                                                                                                                     | scaffold_9_mRNA_2488.1.scaffold_9_mRNA_2496.1                                                                                           | C_unshu_00104_mRNA_34.1                                                                       | -                               |
| GF00018277 | 2                               | 1                           | 0                            | Putative polyprotein (Aspartic protease, reverse transcriptase, ribonuclease H) (2); Hypothetical protein (1)                                                                                                               |                                                                                                                                                                                                                                           |                                                                                                                                                                                                                                                                                                                                                                                                                                                                                     | scaffold_9_mRNA_2383.1.scaffold_9_mRNA_2384.1                                                                                           | C_unshu_00763_mRNA_20.1                                                                       | -                               |
| GF00018065 | 2                               | 1                           | 0                            | Hypothetical protein (3)                                                                                                                                                                                                    |                                                                                                                                                                                                                                           |                                                                                                                                                                                                                                                                                                                                                                                                                                                                                     | scaffold_9_mRNA_1578.1.scaffold_9_mRNA_2138.1                                                                                           | C_unshu_01433_mRNA_9.1                                                                        | -                               |
| GF00017943 | 2                               | 1                           | 0                            | 2-oxoglutarate (2OG) and Fe(II)-dependent oxygenase superfamily protein, putative (3)                                                                                                                                       |                                                                                                                                                                                                                                           |                                                                                                                                                                                                                                                                                                                                                                                                                                                                                     | scaffold_9_mRNA_1112.1.scaffold_9_mRNA_1134.1                                                                                           | C_unshu_00334_mRNA_12.1                                                                       | -                               |
| GF00017165 | 2                               | 1                           | 0                            | Germin-like protein subfamily 2 member 0 (2); Hypothetical protein (1)                                                                                                                                                      | manganese ion binding [GO:00030145 molecular_function] (3); nutrient reservoir activity [GO:0045735 molecular_function] (3)                                                                                                               | RanG-like cupin domain [IPRO11051] (3); Cupin 1 [IPRO06045] (3); RanG-like jelly roll fold [IPRO14710] (3); Germin [IPRO01929] (3)                                                                                                                                                                                                                                                                                                                                                  | scaffold_8_mRNA_2458.1.scaffold_8_mRNA_2461.1                                                                                           | C_unshu_00814_mRNA_15.1                                                                       | -                               |
| GF00016545 | 2                               | 1                           | 0                            | Hypothetical protein (3)                                                                                                                                                                                                    |                                                                                                                                                                                                                                           |                                                                                                                                                                                                                                                                                                                                                                                                                                                                                     | scaffold_7_mRNA_567.1.scaffold_8_mRNA_2690.1                                                                                            | C_unshu_00858_mRNA_4.1                                                                        | -                               |
| GF00016296 | 2                               | 1                           | 0                            | Disease resistance protein (3)                                                                                                                                                                                              | ADP binding [GO:0043531 molecular_function] (3)                                                                                                                                                                                           | Domain of unknown function DUF4283 [IPRO25585] (3); Leucine-rich repeat domain, L domain-like [IPRO23675] (3); P-loop containing nucleoside triphosphate hydrolase [IPRO27417] (3); NB-ARC [IPRO02182] (3); Winged helix-turn-helix DNA-binding domain [IPRO11991] (2); Pentatricopeptide repeat [IPRO02885] (1)                                                                                                                                                                    | scaffold_7_mRNA_2616.1.scaffold_7_mRNA_2621.1                                                                                           | C_unshu_01041_mRNA_2.1                                                                        | -                               |
| GF00015996 | 2                               | 1                           | 0                            | Hypothetical protein (3)                                                                                                                                                                                                    |                                                                                                                                                                                                                                           |                                                                                                                                                                                                                                                                                                                                                                                                                                                                                     | scaffold_7_mRNA_1752.1.scaffold_7_mRNA_1757.1                                                                                           | C_unshu_00055_mRNA_49.1                                                                       | -                               |
| GF00015676 | 2                               | 1                           | 0                            | Putative non-LTR reverse transcriptase (1); Putative non-LTR retroelement 0 reverse transcriptase (3); Putative non-LTR retroelement reverse transcriptase (1)                                                              | nucleic acid binding [GO:0003676 molecular_function] (3)                                                                                                                                                                                  | HSP20-like chaperone [IPRO08978] (3); Alpha crystallin/Hsp20 domain [IPRO02068] (3); Small heat shock protein HSP20 [IPRO03107] (2)                                                                                                                                                                                                                                                                                                                                                 | scaffold_6_mRNA_91.1.scaffold_8_mRNA_1231.1                                                                                             | C_unshu_00329_mRNA_14.1                                                                       | -                               |
| GF00015624 | 2                               | 1                           | 0                            | Hypothetical protein (3)                                                                                                                                                                                                    |                                                                                                                                                                                                                                           |                                                                                                                                                                                                                                                                                                                                                                                                                                                                                     | scaffold_6_mRNA_654.1.scaffold_9_mRNA_458.1                                                                                             | C_unshu_00648_mRNA_17.1                                                                       | -                               |
| GF00015590 | 2                               | 1                           | 0                            | Hypothetical protein (3)                                                                                                                                                                                                    |                                                                                                                                                                                                                                           |                                                                                                                                                                                                                                                                                                                                                                                                                                                                                     | scaffold_6_mRNA_360.1.scaffold_8_mRNA_1379.1                                                                                            | C_unshu_00060_mRNA_66.1                                                                       | -                               |
| GF00015578 | 2                               | 1                           | 0                            | Hypothetical protein (3)                                                                                                                                                                                                    |                                                                                                                                                                                                                                           |                                                                                                                                                                                                                                                                                                                                                                                                                                                                                     | scaffold_6_mRNA_3186.1.scaffold_7_mRNA_2.1                                                                                              | C_unshu_00051_mRNA_12.1                                                                       | -                               |
| GF00015344 | 2                               | 1                           | 0                            | TCP transcription factor CYC1C (1); Hypothetical protein (1); Transcription factor CYC1 (1)                                                                                                                                 |                                                                                                                                                                                                                                           |                                                                                                                                                                                                                                                                                                                                                                                                                                                                                     | scaffold_6_mRNA_2849.1.scaffold_9_mRNA_2986.1                                                                                           | C_unshu_00098_mRNA_25.1                                                                       | -                               |
| GF00014704 | 2                               | 1                           | 0                            | Hypothetical protein (3)                                                                                                                                                                                                    | zinc ion binding [GO:0008270 molecular_function] (2); nucleic acid binding [GO:0003676 molecular_function] (2)                                                                                                                            | Zinc finger, CCHC-type [IPRO01878] (2)                                                                                                                                                                                                                                                                                                                                                                                                                                              | scaffold_6_mRNA_193.1.scaffold_6_mRNA_429.1                                                                                             | C_unshu_00145_mRNA_35.1                                                                       | -                               |
| GF00014655 | 2                               | 1                           | 0                            | Hypothetical protein (3)                                                                                                                                                                                                    |                                                                                                                                                                                                                                           |                                                                                                                                                                                                                                                                                                                                                                                                                                                                                     | scaffold_6_mRNA_1834.1.scaffold_8_mRNA_2504.1                                                                                           | C_unshu_00020_mRNA_59.1                                                                       | -                               |
| GF00014605 | 2                               | 1                           | 0                            | Hypothetical protein (3)                                                                                                                                                                                                    |                                                                                                                                                                                                                                           |                                                                                                                                                                                                                                                                                                                                                                                                                                                                                     | scaffold_6_mRNA_171.1.scaffold_7_mRNA_1092.1                                                                                            | C_unshu_00053_mRNA_11.1                                                                       | -                               |
| GF00014380 | 2                               | 1                           | 0                            | Hypothetical protein (3)                                                                                                                                                                                                    | cysteine-type peptidase activity [GO:0008234 molecular_function] (3); proteolysis [GO:0006508 biological_process] (3)                                                                                                                     | Domain of unknown function DUF1985 [IPRO15410] (3); Ulp1 protease family, C-terminal catalytic domain [IPRO03653] (3)                                                                                                                                                                                                                                                                                                                                                               | scaffold_6_mRNA_1098.1.scaffold_9_mRNA_2090.1                                                                                           | C_unshu_00781_mRNA_14.1                                                                       | -                               |

| ID        | Num. in <i>C. clementinae</i> | Num. in <i>C. acutis</i> | Num. in <i>P. trifoliata</i> | Note                                                                                                                                                                                         | GO                                                                                                                                                                                                                                                                                                                 | InterPro                                                                                                                                                                                                                                                                                                                       | Members in <i>C. clementinae</i>              | Members in <i>C. acutis</i> | Members in <i>P. trifoliata</i> |
|-----------|-------------------------------|--------------------------|------------------------------|----------------------------------------------------------------------------------------------------------------------------------------------------------------------------------------------|--------------------------------------------------------------------------------------------------------------------------------------------------------------------------------------------------------------------------------------------------------------------------------------------------------------------|--------------------------------------------------------------------------------------------------------------------------------------------------------------------------------------------------------------------------------------------------------------------------------------------------------------------------------|-----------------------------------------------|-----------------------------|---------------------------------|
| GF0013772 | 2                             | 1                        | 0                            | Hypothetical protein (2); Putative disease resistance protein RGA1 (1)                                                                                                                       | oxidation-reduction process [GO:0055114 biological_process] (3); oxidoreductase activity [GO:0016491 molecular_function] (3); carotene 7,8-desaturase activity [GO:0016719 molecular_function] (2); carotenoid biosynthetic process [GO:0016117 biological_process] (2)                                            | Leucine-rich repeat domain, L domain-like [IPRO032675] (3); P-loop containing nucleoside triphosphate hydrolase [IPRO027417] (2); GPN-loop GTPase [IPRO04130] (2); GPN-loop GTPase 2 [IPRO03251] (2)                                                                                                                           | scaffold_5_mRNA_445.1,scaffold_5_mRNA_461.1   | C_unshiu_01064_mRNA_8.1     | -                               |
| GF0013233 | 2                             | 1                        | 0                            | Hypothetical protein (3)                                                                                                                                                                     | protein binding [GO:0005515 molecular_function] (3)                                                                                                                                                                                                                                                                | Amine oxidase [IPRO02937] (3); Zeta-carotene desaturase [IPRO14105] (2); FAD/NAD(P)-binding domain [IPRO023753] (1)                                                                                                                                                                                                            | scaffold_5_mRNA_3320.1,scaffold_5_mRNA_3350.1 | C_unshiu_00021_mRNA_1.1     | -                               |
| GF0013184 | 2                             | 1                        | 0                            | Disease resistance family protein / LRR family protein, putative (1); LRR receptor-like serine/threonine-protein kinase GSO1 (1); LRR receptor-like serine/threonine-protein kinase GS02 (1) | protein binding [GO:0005515 molecular_function] (3)                                                                                                                                                                                                                                                                | Leucine-rich repeat domain, L domain-like [IPRO032675] (3); Leucine-rich repeat, typical subtype [IPRO03591] (3); Leucine-rich repeat [IPRO01611] (3); Leucine-rich repeat-containing N-terminal, plant-type [IPRO13210] (2)                                                                                                   | scaffold_5_mRNA_3146.1,scaffold_5_mRNA_3154.1 | C_unshiu_02984_mRNA_2.1     | -                               |
| GF0013047 | 2                             | 1                        | 0                            | Hypothetical protein (3)                                                                                                                                                                     | zinc ion binding [GO:0008270 molecular_function] (3); transposase activity [GO:0004803 molecular_function] (2); transposition, DNA-mediated [GO:0006513 biological_process] (2); DNA binding [GO:0003677 molecular_function] (2)                                                                                   | Transposase, MuDR, plant [IPRO04332] (3); Zinc finger, PIMZ-type [IPRO06564] (3); MULE transposase domain [IPRO18289] (3); Zinc finger, SWIM-type [IPRO07527] (3); Transposase, mutator type [IPRO01207] (2)                                                                                                                   | scaffold_5_mRNA_2479.1,scaffold_6_mRNA_585.1  | C_unshiu_01124_mRNA_7.1     | -                               |
| GF0013019 | 2                             | 1                        | 0                            | MuDR family transposase isoform 1 (2); Putative muDR family transposase-like (1)                                                                                                             | zinc ion binding [GO:0008270 molecular_function] (3); transposase activity [GO:0004803 molecular_function] (2); transposition, DNA-mediated [GO:0006513 biological_process] (2); DNA binding [GO:0003677 molecular_function] (2)                                                                                   | Transposase, MuDR, plant [IPRO04332] (3); Zinc finger, PIMZ-type [IPRO06564] (3); MULE transposase domain [IPRO18289] (3); Zinc finger, SWIM-type [IPRO07527] (3); Transposase, mutator type [IPRO01207] (2)                                                                                                                   | scaffold_5_mRNA_2368.1,scaffold_5_mRNA_2656.1 | C_unshiu_01916_mRNA_3.1     | -                               |
| GF0012975 | 2                             | 1                        | 0                            | Hypothetical protein (3)                                                                                                                                                                     | chromatin binding [GO:0003682 molecular_function] (3); methyltransferase activity [GO:0008168 molecular_function] (1)                                                                                                                                                                                              | 3-adenosyl-4-methionine-dependent methyltransferase [IPRO029663] (3); DNA (cytosine-5)-methyltransferase 1, replication fork domain [IPRO02702] (3); Bromo adjacent homology (BAH) domain [IPRO01025] (3); DNA methylase, C-5 cytosine-specific, conserved site [IPRO1303] (2); C-5 cytosine methyltransferase [IPRO01525] (1) | scaffold_5_mRNA_218.1,scaffold_5_mRNA_226.1   | C_unshiu_00904_mRNA_5.1     | -                               |
| GF0012863 | 2                             | 1                        | 0                            | SLG-Sc and SLA-Sc genes and Melnoh retrotransposon sequence (3)                                                                                                                              | nucleic acid binding [GO:0003676 molecular_function] (1)                                                                                                                                                                                                                                                           | Ribonuclease H-like domain [IPRO12337] (1)                                                                                                                                                                                                                                                                                     | scaffold_5_mRNA_170.1,scaffold_5_mRNA_982.1   | C_unshiu_00083_mRNA_35.1    | -                               |
| GF0012828 | 2                             | 1                        | 0                            | Hypothetical protein (3)                                                                                                                                                                     | Reverse transcriptase, RNA-dependent DNA polymerase [IPRO1303] (2)                                                                                                                                                                                                                                                 | Reverse transcriptase, RNA-dependent DNA polymerase [IPRO1303] (2)                                                                                                                                                                                                                                                             | scaffold_5_mRNA_1436.1,scaffold_8_mRNA_1637.1 | C_unshiu_02887_mRNA_2.1     | -                               |
| GF0012770 | 2                             | 1                        | 0                            | Putative disease resistance RGA1 (1); TIR-NBS-LRR type disease resistance protein (1); Disease resistance protein RGA4 (1)                                                                   | ADP binding [GO:0043531 molecular_function] (3)                                                                                                                                                                                                                                                                    | Leucine-rich repeat domain, L domain-like [IPRO032675] (3); P-loop containing nucleoside triphosphate hydrolase [IPRO027417] (3); NB-ARC [IPRO02182] (3)                                                                                                                                                                       | scaffold_5_mRNA_1173.1,scaffold_5_mRNA_1174.1 | C_unshiu_01250_mRNA_2.1     | -                               |
| GF0012769 | 2                             | 1                        | 0                            | Solute carrier family 25 member 44 (2); Hypothetical protein (1)                                                                                                                             | O-methyltransferase activity [GO:0008171 molecular_function] (3); methyltransferase activity [GO:0008168 molecular_function] (3)                                                                                                                                                                                   | Mitochondrial carrier domain [IPRO02358] (3); Mitochondrial substrate/solute carrier [IPRO10108] (3); Winged helix-helix DNA-binding domain [IPRO1199] (1); O-methyltransferase, family 2 [IPRO01077] (3); O-methyltransferase COMT-type [IPRO1646] (3); S-adenosyl-L-methionine-dependent methyltransferase [IPRO029663] (3)  | scaffold_5_mRNA_1170.1,scaffold_5_mRNA_1706.1 | C_unshiu_01766_mRNA_4.1     | -                               |
| GF0012630 | 2                             | 1                        | 0                            | Caffeic acid 3-O-methyltransferase (2); Caffeic acid O-methyltransferase (1)                                                                                                                 | O-methyltransferase activity [GO:0008171 molecular_function] (3); methyltransferase activity [GO:0008168 molecular_function] (3)                                                                                                                                                                                   | methyltransferase, family 2 [IPRO01077] (3); O-methyltransferase COMT-type [IPRO1646] (3); S-adenosyl-L-methionine-dependent methyltransferase [IPRO029663] (3)                                                                                                                                                                | scaffold_4_mRNA_786.1,scaffold_5_mRNA_2803.1  | C_unshiu_00980_mRNA_9.1     | -                               |
| GF0012628 | 2                             | 1                        | 0                            | Hypothetical protein (3)                                                                                                                                                                     |                                                                                                                                                                                                                                                                                                                    |                                                                                                                                                                                                                                                                                                                                | scaffold_4_mRNA_775.1,scaffold_6_mRNA_940.1   | C_unshiu_00407_mRNA_20.1    | -                               |
| GF0012598 | 2                             | 1                        | 0                            | Hypothetical protein (3)                                                                                                                                                                     |                                                                                                                                                                                                                                                                                                                    |                                                                                                                                                                                                                                                                                                                                | scaffold_4_mRNA_625.1,scaffold_4_mRNA_797.1   | C_unshiu_00607_mRNA_7.1     | -                               |
| GF0012597 | 2                             | 1                        | 0                            | Hypothetical protein (3)                                                                                                                                                                     |                                                                                                                                                                                                                                                                                                                    |                                                                                                                                                                                                                                                                                                                                | scaffold_4_mRNA_624.1,scaffold_4_mRNA_796.1   | C_unshiu_00607_mRNA_9.1     | -                               |
| GF0011727 | 2                             | 1                        | 0                            | Hypothetical protein (3)                                                                                                                                                                     | nucleic acid binding [GO:0003676 molecular_function] (3); zinc ion binding [GO:0008270 molecular_function] (3); RNA-DNA hybrid ribonuclease activity [GO:0004523 molecular_function] (1)                                                                                                                           | Domain of unknown function DUF4283 [IPRO01878] (3); Zinc knuckle CX2CX4HXAC [IPRO25836] (3); Ribonuclease H-like domain [IPRO12337] (1); Ribonuclease H domain [IPRO02136] (1)                                                                                                                                                 | scaffold_4_mRNA_2432.1,scaffold_8_mRNA_3525.1 | C_unshiu_00011_mRNA_23.1    | -                               |
| GF0011508 | 2                             | 1                        | 0                            | Hypothetical protein (3)                                                                                                                                                                     | drug transmembrane transport [GO:0006855 biological_process] (3); membrane [GO:0016020 cellular_component] (3); antiporter activity [GO:0015297 molecular_function] (3); drug transmembrane transporter activity [GO:0015238 molecular_function] (3); transmembrane transport [GO:0055085 biological_process] (3)  | Multi antimicrobial extrusion protein [IPRO02528] (3)                                                                                                                                                                                                                                                                          | scaffold_4_mRNA_2051.1,scaffold_4_mRNA_2062.1 | C_unshiu_00700_mRNA_5.1     | -                               |
| GF0011505 | 2                             | 1                        | 0                            | MATE efflux family protein, expressed (2); Protein TRANSPARENT TESTA 12-like protein (1)                                                                                                     | drug transmembrane transport [GO:0006855 biological_process] (3); membrane [GO:0016020 cellular_component] (3); antiporter activity [GO:0015297 molecular_function] (3); drug transmembrane transporter activity [GO:0015238 molecular_function] (3); transmembrane transport [GO:0055085 biological_process] (3)  | Multi antimicrobial extrusion protein [IPRO02528] (3)                                                                                                                                                                                                                                                                          | scaffold_4_mRNA_2051.1,scaffold_4_mRNA_2062.1 | C_unshiu_00700_mRNA_5.1     | -                               |
| GF0010919 | 2                             | 1                        | 0                            | Putative non-LTR retroelement reverse transcriptase (2); RNA-directed DNA O polymerase (Reverse transcriptase); Polynucleotidyl transferase; Ribonuclease H fold-like protein (1)            | nucleic acid binding [GO:0003676 molecular_function] (3); zinc ion binding [GO:0008270 molecular_function] (1)                                                                                                                                                                                                     | Ribonuclease H-like domain [IPRO12337] (3); Reverse transcriptase zinc-binding domain [IPRO02690] (3); Reverse transcriptase domain [IPRO00477] (2); Domain of unknown function DUF4283 [IPRO25588] (1); Zinc finger, CCHC-type [IPRO01878] (1); Zinc knuckle CX2CX4HXAC [IPRO25836] (1)                                       | scaffold_3_mRNA_74.1,scaffold_8_mRNA_1800.1   | C_unshiu_01050_mRNA_1.1     | -                               |
| GF0010055 | 2                             | 1                        | 0                            | Hypothetical protein (3)                                                                                                                                                                     | cysteine-type peptidase activity [GO:0008234 molecular_function] (3); proteolysis [GO:0006508 biological_process] (3)                                                                                                                                                                                              | Upl1 protease family, C-terminal catalytic domain [IPRO03653] (3)                                                                                                                                                                                                                                                              | scaffold_3_mRNA_5152.1,scaffold_8_mRNA_779.1  | C_unshiu_00016_mRNA_54.1    | -                               |
| GF0009624 | 2                             | 1                        | 0                            | Hypothetical protein (3)                                                                                                                                                                     |                                                                                                                                                                                                                                                                                                                    |                                                                                                                                                                                                                                                                                                                                | scaffold_3_mRNA_4218.1,scaffold_3_mRNA_4219.1 | C_unshiu_02578_mRNA_6.1     | -                               |
| GF0009518 | 2                             | 1                        | 0                            | Receptor like protein 33 (2); Receptor like protein 27 (1)                                                                                                                                   | protein binding [GO:0005515 molecular_function] (2)                                                                                                                                                                                                                                                                | Leucine-rich repeat domain, L domain-like [IPRO032675] (3); Leucine-rich repeat [IPRO01611] (2)                                                                                                                                                                                                                                | scaffold_3_mRNA_3779.1,scaffold_3_mRNA_3794.1 | C_unshiu_00188_mRNA_19.1    | -                               |
| GF0009483 | 2                             | 1                        | 0                            | Secologanin synthase (2); Putative O cytochrome P450 monooxygenase CYP2A5 (1)                                                                                                                | oxidation-reduction process [GO:0055114 biological_process] (3); oxidoreductase activity, acting on paired donors, with incorporation or reduction of molecular oxygen [GO:0016705 molecular_function] (3); zinc ion binding [GO:0008270 molecular_function] (3); heme binding [GO:0020037 molecular_function] (3) | Cytochrome P450 [IPRO01128] (3); Cytochrome P450, F-class, group I [IPRO02401] (3); Cytochrome P450, conserved site [IPRO17972] (2)                                                                                                                                                                                            | scaffold_3_mRNA_3640.1,scaffold_3_mRNA_3641.1 | C_unshiu_01261_mRNA_7.1     | -                               |
| GF0009446 | 2                             | 1                        | 0                            | Hypothetical protein (2); Putative Ty-1 copia retrotransposon (1)                                                                                                                            | DNA integration [GO:0015074 biological_process] (3); nucleic acid binding [GO:0003676 molecular_function] (3)                                                                                                                                                                                                      | Ribonuclease H-like domain [IPRO12337] (3); Integrase, catalytic core [IPRO01584] (3); GAG-pre-integrase domain [IPRO02574] (2); Reverse transcriptase, RNA-dependent DNA polymerase [IPRO13103] (1)                                                                                                                           | scaffold_3_mRNA_3484.1,scaffold_9_mRNA_3298.1 | C_unshiu_00381_mRNA_12.1    | -                               |
| GF0009410 | 2                             | 1                        | 0                            | Retrotransposon protein, putative, Ty3-gypsy subclass, expressed (3)                                                                                                                         | zinc ion binding [GO:0008270 molecular_function] (3); regulation of transcription, DNA-templated [GO:0006355 biological_process] (3); nucleic acid binding [GO:0003676 molecular_function] (2)                                                                                                                     | Aspartic peptidase domain [IPRO02109] (3); FYF1/FAR1 family [IPRO1052] (3); MULE transposase domain [IPRO18289] (3); Zinc finger, SWIM-type [IPRO07527] (3); FAR1 DNA binding domain [IPRO0430] (2); Zinc finger, CCHC-type [IPRO01878] (2)                                                                                    | scaffold_3_mRNA_3354.1,scaffold_8_mRNA_866.1  | C_unshiu_01045_mRNA_10.1    | -                               |
| GF0009400 | 2                             | 1                        | 0                            | Protein FAR1-RELATED SEQUENCE 8 (2); Protein FAR1-RELATED SEQUENCE 9 (1)                                                                                                                     | nucleic acid binding [GO:0003676 molecular_function] (3); zinc ion binding [GO:0008270 molecular_function] (3)                                                                                                                                                                                                     | MULE transposase domain [IPRO18289] (3); Zinc finger, SWIM-type [IPRO07527] (3); FAR1 DNA binding domain [IPRO0430] (2); Zinc finger, CCHC-type [IPRO01878] (2)                                                                                                                                                                | scaffold_3_mRNA_3289.1,scaffold_6_mRNA_789.1  | C_unshiu_00120_mRNA_8.1     | -                               |
| GF0009265 | 2                             | 1                        | 0                            | Hypothetical protein (3)                                                                                                                                                                     | nucleic acid binding [GO:0003676 molecular_function] (2)                                                                                                                                                                                                                                                           | Ribonuclease H-like domain [IPRO12337] (3); Retrotransposon gag domain [IPRO0162] (1)                                                                                                                                                                                                                                          | scaffold_3_mRNA_2694.1,scaffold_9_mRNA_1410.1 | C_unshiu_00423_mRNA_2.1     | -                               |
| GF0009264 | 2                             | 1                        | 0                            | Hypothetical protein (3)                                                                                                                                                                     |                                                                                                                                                                                                                                                                                                                    |                                                                                                                                                                                                                                                                                                                                | scaffold_3_mRNA_2691.1,scaffold_3_mRNA_2707.1 | C_unshiu_01233_mRNA_2.1     | -                               |
| GF0009198 | 2                             | 1                        | 0                            | Hypothetical protein (2); Transposable element Ac (1)                                                                                                                                        | DNA binding [GO:0003677 molecular_function] (3); nucleic acid binding [GO:0003676 molecular_function] (3)                                                                                                                                                                                                          | Ribonuclease H-like domain [IPRO12337] (3); hAT-like transposase, RNase-H fold [IPRO02525] (3)                                                                                                                                                                                                                                 | scaffold_3_mRNA_2488.1,scaffold_5_mRNA_1866.1 | C_unshiu_00242_mRNA_15.1    | -                               |
| GF0009195 | 2                             | 1                        | 0                            | Hypothetical protein (3)                                                                                                                                                                     |                                                                                                                                                                                                                                                                                                                    |                                                                                                                                                                                                                                                                                                                                | scaffold_3_mRNA_2478.1,scaffold_4_mRNA_917.1  | C_unshiu_00013_mRNA_37.1    | -                               |
| GF0009188 | 2                             | 1                        | 0                            | Hypothetical protein (3)                                                                                                                                                                     |                                                                                                                                                                                                                                                                                                                    |                                                                                                                                                                                                                                                                                                                                | scaffold_3_mRNA_2439.1,scaffold_7_mRNA_1159.1 | C_unshiu_01265_mRNA_13.1    | -                               |
| GF0009180 | 2                             | 1                        | 0                            | Hypothetical protein (2); Upl1 protease O family, carboxy-terminal domain protein (1)                                                                                                        | cysteine-type peptidase activity [GO:0008234 molecular_function] (3); proteolysis [GO:0006508 biological_process] (3)                                                                                                                                                                                              | Upl1 protease family, C-terminal catalytic domain [IPRO03653] (3)                                                                                                                                                                                                                                                              | scaffold_3_mRNA_2404.1,scaffold_8_mRNA_1860.1 | C_unshiu_00413_mRNA_5.1     | -                               |
| GF0009158 | 2                             | 1                        | 0                            | Hypothetical protein (3)                                                                                                                                                                     |                                                                                                                                                                                                                                                                                                                    |                                                                                                                                                                                                                                                                                                                                | scaffold_3_mRNA_2326.1,scaffold_3_mRNA_2349.1 | C_unshiu_00625_mRNA_9.1     | -                               |
| GF0009117 | 2                             | 1                        | 0                            | Hypothetical protein (3)                                                                                                                                                                     |                                                                                                                                                                                                                                                                                                                    |                                                                                                                                                                                                                                                                                                                                | scaffold_3_mRNA_2217.1,scaffold_3_mRNA_3407.1 | C_unshiu_01549_mRNA_4.1     | -                               |
| GF0009052 | 2                             | 1                        | 0                            | Hypothetical protein (3)                                                                                                                                                                     |                                                                                                                                                                                                                                                                                                                    |                                                                                                                                                                                                                                                                                                                                | scaffold_3_mRNA_1879.1,scaffold_3_mRNA_1896.1 | C_unshiu_01678_mRNA_9.1     | -                               |
| GF0008956 | 2                             | 1                        | 0                            | Hypothetical protein (3)                                                                                                                                                                     |                                                                                                                                                                                                                                                                                                                    |                                                                                                                                                                                                                                                                                                                                | scaffold_3_mRNA_1523.1,scaffold_5_mRNA_1158.1 | C_unshiu_00101_mRNA_47.1    | -                               |

| ID        | Num. in <i>C. caryotactis</i> | Num. in <i>C. acutis</i> | Num. in <i>P. trifoliate</i> | Note                                                                                                                                                                            | GO                                                                                                                                                                                                                                                                                                                                    | InterPro                                                                                                                                                                                                                                                                                                                                                                                                                                                                          | Members in <i>C. caryotactis</i>              | Members in <i>C. acutis</i>                       | Members in <i>P. trifoliate</i> |
|-----------|-------------------------------|--------------------------|------------------------------|---------------------------------------------------------------------------------------------------------------------------------------------------------------------------------|---------------------------------------------------------------------------------------------------------------------------------------------------------------------------------------------------------------------------------------------------------------------------------------------------------------------------------------|-----------------------------------------------------------------------------------------------------------------------------------------------------------------------------------------------------------------------------------------------------------------------------------------------------------------------------------------------------------------------------------------------------------------------------------------------------------------------------------|-----------------------------------------------|---------------------------------------------------|---------------------------------|
| GF0008931 | 2                             | 1                        | 0                            | Putative endR family transposase-like (2); AlpA (1)                                                                                                                             | zinc ion binding [GO:0008270 molecular_function] (3); nucleic acid binding [GO:0003676 molecular_function] (3); transposition, DNA-mediated [GO:0006513 biological_process] (2); transposase activity [GO:0004803 molecular_function] (2); DNA binding [GO:0003677 molecular_function] (2)                                            | Zinc finger, CCHC-type [IPRO01878] (3); Zinc finger, PML-type [IPRO06564] (3); Zinc finger, SWIM-type [IPRO07527] (3); Transposase, mutator type [IPRO01207] (2); MULE transposase domain [IPRO18289] (2)                                                                                                                                                                                                                                                                         | scaffold_3_mRNA_1439.1,scaffold_6_mRNA_1954.1 | C_unshiu_00259_mRNA_39.1                          | -                               |
| GF0008733 | 2                             | 1                        | 0                            | Hypothetical protein (2); UDP-glycosyltransferase 83A1 (1)                                                                                                                      | metabolic process [GO:0008152 biological_process] (3); transferase activity, transferring hexosyl groups [GO:016758 molecular_function] (3)                                                                                                                                                                                           | UDP-glucuronosylUDP-glycosyltransferase [IPRO02213] (3)                                                                                                                                                                                                                                                                                                                                                                                                                           | scaffold_3_mRNA_1039.1,scaffold_3_mRNA_1065.1 | C_unshiu_00030_mRNA_76.1                          | -                               |
| GF0008535 | 2                             | 1                        | 0                            | Retrotransposon protein, putative, Ty3-gypsy subclass (1); DNA/RNA polymerase superfamily protein (1); Hypothetical protein (1)                                                 | proteolysis [GO:0006508 biological_process] (3); aspartic-type endopeptidase activity [GO:0004190 molecular_function] (3)                                                                                                                                                                                                             | Aspartic peptidase, active site [IPRO01969] (3); Aspartic peptidase domain [IPRO21109] (3); Retrotransposon gag domain [IPRO05162] (3)                                                                                                                                                                                                                                                                                                                                            | scaffold_2_mRNA_558.1,scaffold_7_mRNA_1250.1  | C_unshiu_00646_mRNA_16.1                          | -                               |
| GF0008407 | 2                             | 1                        | 0                            | Hypothetical protein (3)                                                                                                                                                        |                                                                                                                                                                                                                                                                                                                                       |                                                                                                                                                                                                                                                                                                                                                                                                                                                                                   | scaffold_2_mRNA_4605.1,scaffold_8_mRNA_2654.1 | C_unshiu_00337_mRNA_15.1                          | -                               |
| GF0008271 | 2                             | 1                        | 0                            | Hypothetical protein (3)                                                                                                                                                        |                                                                                                                                                                                                                                                                                                                                       | P-loop containing nucleoside triphosphate hydrolase [IPRO27417] (1)                                                                                                                                                                                                                                                                                                                                                                                                               | scaffold_2_mRNA_443.1,scaffold_4_mRNA_1594.1  | C_unshiu_00244_mRNA_24.1                          | -                               |
| GF0007901 | 2                             | 1                        | 0                            | Hypothetical protein (3)                                                                                                                                                        | zinc ion binding [GO:0008270 molecular_function] (3); nucleic acid binding [GO:0003676 molecular_function] (3); aspartic-type endopeptidase activity [GO:0004190 molecular_function] (1); proteolysis [GO:0006508 biological_process] (1)                                                                                             | Zinc finger, CCHC-type [IPRO01878] (3); Viral movement protein [IPRO28919] (2); Aspartic peptidase domain [IPRO21109] (1); Aspartic peptidase, active site [IPRO01969] (1); Retropepsin [IPRO18061] (1)                                                                                                                                                                                                                                                                           | scaffold_2_mRNA_392.1,scaffold_5_mRNA_1015.1  | C_unshiu_00246_mRNA_9.1                           | -                               |
| GF0007847 | 2                             | 1                        | 0                            | Hypothetical protein (3)                                                                                                                                                        |                                                                                                                                                                                                                                                                                                                                       |                                                                                                                                                                                                                                                                                                                                                                                                                                                                                   | scaffold_2_mRNA_3838.1,scaffold_9_mRNA_1959.1 | C_unshiu_00089_mRNA_37.1                          | -                               |
| GF0007476 | 2                             | 1                        | 0                            | Putative non-LTR retroelement reverse transcriptase (3); RNA-directed DNA polymerase; Ribonuclease H, putative (1)                                                              | nucleic acid binding [GO:0003676 molecular_function] (1)                                                                                                                                                                                                                                                                              | Endonuclease/exonuclease/phosphatase [IPRO05155] (3); Reverse transcriptase zinc-binding domain [IPRO26960] (2); Reverse transcriptase domain [IPRO04477] (2); Ribonuclease H-like domain [IPRO12337] (1)                                                                                                                                                                                                                                                                         | scaffold_2_mRNA_3224.1,scaffold_7_mRNA_2536.1 | C_unshiu_00141_mRNA_10.1                          | -                               |
| GF0007244 | 2                             | 1                        | 0                            | Heat shock protein 60 isoform 2 (2); Chaperonin-60 kDa protein isoform 2 (1)                                                                                                    | ATP binding [GO:0005524 molecular_function] (2)                                                                                                                                                                                                                                                                                       | GroEL-like apical domain [IPRO27409] (3); Chaperonin Cpn60/TCP-1 family [IPRO02423] (2); TCP-1-like chaperonin intermediate domain [IPRO27410] (1)                                                                                                                                                                                                                                                                                                                                | scaffold_2_mRNA_2653.1,scaffold_2_mRNA_2656.1 | C_unshiu_00417_mRNA_3.1                           | -                               |
| GF0007243 | 2                             | 1                        | 0                            | Hypothetical protein (3)                                                                                                                                                        | rRNA processing [GO:0006364 biological_process] (3); nucleosome-containing compound metabolic process [GO:0006139 biological_process] (3); nucleic acid binding [GO:0003676 molecular_function] (3)                                                                                                                                   | Ribonuclease H-like domain [IPRO12337] (3); Putative pre-16S rRNA cleavage [IPRO05272] (3); YggF/RNase H-like domain [IPRO06641] (3)                                                                                                                                                                                                                                                                                                                                              | scaffold_2_mRNA_2652.1,scaffold_2_mRNA_2655.1 | C_unshiu_00417_mRNA_2.1                           | -                               |
| GF0007136 | 2                             | 1                        | 0                            | Hypothetical protein (3)                                                                                                                                                        |                                                                                                                                                                                                                                                                                                                                       |                                                                                                                                                                                                                                                                                                                                                                                                                                                                                   | scaffold_2_mRNA_198.1,scaffold_9_mRNA_2423.1  | C_unshiu_00644_mRNA_5.1                           | -                               |
| GF0006671 | 2                             | 1                        | 0                            | Hypothetical protein (2); Putative Ty3-gypsy-like retroelement pol polyprotein (1)                                                                                              | nucleic acid binding [GO:0003676 molecular_function] (3)                                                                                                                                                                                                                                                                              | Ribonuclease H-like domain [IPRO12337] (3)                                                                                                                                                                                                                                                                                                                                                                                                                                        | scaffold_1_mRNA_976.1,scaffold_5_mRNA_1006.1  | C_unshiu_00641_mRNA_10.1                          | -                               |
| GF0005994 | 2                             | 1                        | 0                            | Myb domain protein 5 (2); Myb domain protein 5 isoform 1 (1)                                                                                                                    | DNA binding [GO:0003677 molecular_function] (3)                                                                                                                                                                                                                                                                                       | Myb domain [IPRO17930] (3); SANT/Myb domain [IPRO1005] (3); Homeobox domain-like [IPRO09057] (2); RNA, 737.1                                                                                                                                                                                                                                                                                                                                                                      | scaffold_1_mRNA_3085.1,scaffold_3_mRNA_737.1  | C_unshiu_00442_mRNA_24.1                          | -                               |
| GF0005648 | 2                             | 1                        | 0                            | Hypothetical protein (3)                                                                                                                                                        |                                                                                                                                                                                                                                                                                                                                       |                                                                                                                                                                                                                                                                                                                                                                                                                                                                                   | scaffold_1_mRNA_2443.1,scaffold_9_mRNA_2472.1 | C_unshiu_00626_mRNA_15.1                          | -                               |
| GF0005611 | 2                             | 1                        | 0                            | Hypothetical protein (3)                                                                                                                                                        |                                                                                                                                                                                                                                                                                                                                       |                                                                                                                                                                                                                                                                                                                                                                                                                                                                                   | scaffold_1_mRNA_2300.1,scaffold_3_mRNA_451.1  | C_unshiu_01237_mRNA_10.1                          | -                               |
| GF0005508 | 2                             | 1                        | 0                            | Hypothetical protein (3)                                                                                                                                                        |                                                                                                                                                                                                                                                                                                                                       |                                                                                                                                                                                                                                                                                                                                                                                                                                                                                   | scaffold_1_mRNA_2055.1,scaffold_2_mRNA_1138.1 | C_unshiu_00044_mRNA_25.1                          | -                               |
| GF0005416 | 2                             | 1                        | 0                            | Hypothetical protein (3)                                                                                                                                                        |                                                                                                                                                                                                                                                                                                                                       |                                                                                                                                                                                                                                                                                                                                                                                                                                                                                   | scaffold_1_mRNA_1782.1,scaffold_8_mRNA_1541.1 | C_unshiu_00441_mRNA_22.1                          | -                               |
| GF0005413 | 2                             | 1                        | 0                            | Hypothetical protein (3)                                                                                                                                                        |                                                                                                                                                                                                                                                                                                                                       |                                                                                                                                                                                                                                                                                                                                                                                                                                                                                   | scaffold_1_mRNA_1764.1,scaffold_5_mRNA_525.1  | C_unshiu_00644_mRNA_9.1                           | -                               |
| GF0005360 | 2                             | 1                        | 0                            | Hypothetical protein (3)                                                                                                                                                        |                                                                                                                                                                                                                                                                                                                                       |                                                                                                                                                                                                                                                                                                                                                                                                                                                                                   | scaffold_1_mRNA_1606.1,scaffold_3_mRNA_4360.1 | C_unshiu_01294_mRNA_2.1                           | -                               |
| GF0005303 | 2                             | 1                        | 0                            | Putative nuclease HARBI1 (2); Hypothetical protein (1)                                                                                                                          | carbohydrate metabolic process [GO:0009795 biological_process] (2); hydrolase activity, hydrolyzing O-glycosyl compounds [GO:0004553 molecular_function] (2)                                                                                                                                                                          | Harbinger transposase-derived nuclease domain [IPRO27806] (3); Glycoside hydrolase family 17 [IPRO00490] (2); Glycoside hydrolase superfamily [IPRO17853] (2); Myb/SANT-like domain [IPRO4752] (1); Glycoside hydrolase, catalytic domain [IPRO13781] (1)                                                                                                                                                                                                                         | scaffold_1_mRNA_1334.1,scaffold_3_mRNA_6170.1 | C_unshiu_01540_mRNA_2.1                           | -                               |
| GF0005249 | 2                             | 1                        | 0                            | Hypothetical protein (3)                                                                                                                                                        |                                                                                                                                                                                                                                                                                                                                       |                                                                                                                                                                                                                                                                                                                                                                                                                                                                                   | scaffold_1_mRNA_1170.1,scaffold_6_mRNA_290.1  | C_unshiu_00385_mRNA_5.1                           | -                               |
| GF0004997 | 2                             | 2                        | 0                            | Glycan endo-1,3-beta-glucosidase, basic isoform (4)                                                                                                                             | hydrolase activity, hydrolyzing O-glycosyl compounds [GO:0004553 molecular_function] (4); carbohydrate metabolic process [GO:0009795 biological_process] (4)                                                                                                                                                                          | Glycoside hydrolase family 17 [IPRO00490] (4); Glycoside hydrolase superfamily [IPRO17853] (4); Glycoside hydrolase, catalytic domain [IPRO13781] (2)                                                                                                                                                                                                                                                                                                                             | scaffold_9_mRNA_2586.1,scaffold_9_mRNA_2472.1 | C_unshiu_00046_mRNA_10.1,C_unshiu_00046_mRNA_7.1  | -                               |
| GF0004968 | 2                             | 2                        | 0                            | Hypothetical protein (4)                                                                                                                                                        |                                                                                                                                                                                                                                                                                                                                       |                                                                                                                                                                                                                                                                                                                                                                                                                                                                                   | scaffold_9_mRNA_197.1,scaffold_9_mRNA_2713.1  | C_unshiu_00355_mRNA_10.1,C_unshiu_01190_mRNA_3.1  | -                               |
| GF0004873 | 2                             | 2                        | 0                            | Hypothetical protein (4)                                                                                                                                                        |                                                                                                                                                                                                                                                                                                                                       |                                                                                                                                                                                                                                                                                                                                                                                                                                                                                   | scaffold_8_mRNA_583.1,scaffold_9_mRNA_3186.1  | C_unshiu_00599_mRNA_9.1,C_unshiu_01091_mRNA_3.1   | -                               |
| GF0004739 | 2                             | 2                        | 0                            | Hypothetical protein (4)                                                                                                                                                        |                                                                                                                                                                                                                                                                                                                                       |                                                                                                                                                                                                                                                                                                                                                                                                                                                                                   | scaffold_8_mRNA_232.1,scaffold_8_mRNA_256.1   | C_unshiu_00024_mRNA_97.2,C_unshiu_00116_mRNA_11.1 | -                               |
| GF0004715 | 2                             | 2                        | 0                            | Hypothetical protein (4)                                                                                                                                                        | cysteine-type peptidase activity [GO:0005234 molecular_function] (4); proteolysis [GO:0006508 biological_process] (4)                                                                                                                                                                                                                 | Ulp1 protease family, C-terminal catalytic domain [IPRO03653] (4)                                                                                                                                                                                                                                                                                                                                                                                                                 | scaffold_8_mRNA_1986.1,scaffold_9_mRNA_2674.1 | C_unshiu_00032_mRNA_55.1,C_unshiu_00093_mRNA_40.1 | -                               |
| GF0004703 | 2                             | 2                        | 0                            | Hypothetical protein (4)                                                                                                                                                        |                                                                                                                                                                                                                                                                                                                                       |                                                                                                                                                                                                                                                                                                                                                                                                                                                                                   | scaffold_8_mRNA_1593.1,scaffold_9_mRNA_2335.1 | C_unshiu_00118_mRNA_50.1,C_unshiu_01343_mRNA_2.1  | -                               |
| GF0004698 | 2                             | 2                        | 0                            | Hypothetical protein (4)                                                                                                                                                        |                                                                                                                                                                                                                                                                                                                                       |                                                                                                                                                                                                                                                                                                                                                                                                                                                                                   | scaffold_8_mRNA_1558.1,scaffold_9_mRNA_2357.1 | C_unshiu_00118_mRNA_69.1,C_unshiu_01687_mRNA_11.1 | -                               |
| GF0004577 | 2                             | 2                        | 0                            | Tyrosine decarboxylase (4)                                                                                                                                                      | carboxylic acid metabolic process [GO:0019752 biological_process] (4); carboxy-lyase activity [GO:0010831 molecular_function] (4); pyridoxal phosphate binding [GO:0030170 molecular_function] (4); catalytic activity [GO:0003824 molecular_function] (4); cellular amino acid metabolic process [GO:0006520 biological_process] (4) | Pyridoxal phosphate-dependent transferase, major region, subdomain 1 [IPRO15421] (4); Pyridoxal phosphate-dependent decarboxylase [IPRO02129] (4); Pyridoxal phosphate binding site [IPRO21115] (4); Pyridoxal phosphate-dependent transferase [IPRO15424] (4); Aromatic L-amino acid decarboxylase [IPRO10977] (4); Pyridoxal phosphate-dependent transferase, subdomain 2 [IPRO15422] (2); Pyridoxal phosphate-dependent transferase, major region, subdomain 2 [IPRO15421] (2) | scaffold_7_mRNA_2706.1,scaffold_7_mRNA_2711.1 | C_unshiu_01382_mRNA_3.1,C_unshiu_01382_mRNA_9.1   | -                               |
| GF0004474 | 2                             | 2                        | 0                            | Hypothetical protein (4)                                                                                                                                                        |                                                                                                                                                                                                                                                                                                                                       |                                                                                                                                                                                                                                                                                                                                                                                                                                                                                   | scaffold_7_mRNA_1639.1,scaffold_7_mRNA_1677.1 | C_unshiu_00352_mRNA_16.1,C_unshiu_02190_mRNA_3.1  | -                               |
| GF0004365 | 2                             | 2                        | 0                            | Hypothetical protein (4)                                                                                                                                                        | proteolysis [GO:0006508 biological_process] (2); aspartic-type endopeptidase activity [GO:0004190 molecular_function] (2)                                                                                                                                                                                                             | Aspartic peptidase domain [IPRO21109] (4); Aspartic peptidase, active site [IPRO01969] (2)                                                                                                                                                                                                                                                                                                                                                                                        | scaffold_6_mRNA_297.1,scaffold_9_mRNA_2638.1  | C_unshiu_00444_mRNA_8.1,C_unshiu_00611_mRNA_1.1   | -                               |
| GF0004242 | 2                             | 2                        | 0                            | Hypothetical protein (4)                                                                                                                                                        |                                                                                                                                                                                                                                                                                                                                       |                                                                                                                                                                                                                                                                                                                                                                                                                                                                                   | scaffold_5_mRNA_907.1,scaffold_5_mRNA_910.1   | C_unshiu_00292_mRNA_17.1,C_unshiu_00292_mRNA_20.1 | -                               |
| GF0004238 | 2                             | 2                        | 0                            | Phloem protein 2-4B5 (4)                                                                                                                                                        | protein binding [GO:0005515 molecular_function] (2); cell wall [GO:0005618 cellular_component] (4); cell wall modification [GO:0042545 biological_process] (4); pectinesterase activity [GO:0003059 molecular_function] (4)                                                                                                           | Phloem protein 2-like [IPRO25886] (4); F-box domain [IPRO01810] (2)                                                                                                                                                                                                                                                                                                                                                                                                               | scaffold_5_mRNA_895.1,scaffold_5_mRNA_903.1   | C_unshiu_00292_mRNA_14.1,C_unshiu_00292_mRNA_7.1  | -                               |
| GF0004204 | 2                             | 2                        | 0                            | Putative pectinesterase/pectinesterase inhibitor 38 (2); Pectinesterase 2 (2)                                                                                                   | cellular component (4); cell wall modification [GO:0042545 biological_process] (4); pectinesterase activity [GO:0003059 molecular_function] (4)                                                                                                                                                                                       | Pectinesterase, Asp active site [IPRO33131] (4); Pectinesterase, catalytic [IPRO0070] (4); Pectin lyase fold [IPRO12334] (4); Pectin lyase fold/virulence factor [IPRO11050] (4)                                                                                                                                                                                                                                                                                                  | scaffold_5_mRNA_521.1,scaffold_5_mRNA_526.1   | C_unshiu_00561_mRNA_11.1,C_unshiu_00710_mRNA_14.1 | -                               |
| GF0004099 | 2                             | 2                        | 0                            | Putative non-LTR retroelement reverse transcriptase (3); RNA-directed DNA polymerase (Reverse transcriptase); Polynucleotidyl transferase; Ribonuclease H fold-like protein (1) | nucleic acid binding [GO:0003676 molecular_function] (4)                                                                                                                                                                                                                                                                              | Ribonuclease H-like domain [IPRO12337] (4); Reverse transcriptase zinc-binding domain [IPRO26960] (4); Reverse transcriptase domain [IPRO04477] (3)                                                                                                                                                                                                                                                                                                                               | scaffold_5_mRNA_4157.1,scaffold_9_mRNA_451.1  | C_unshiu_00053_mRNA_69.1,C_unshiu_00174_mRNA_11.1 | -                               |
| GF0004058 | 2                             | 2                        | 0                            | Hypothetical protein (4)                                                                                                                                                        | zinc ion binding [GO:0008270 molecular_function] (1); damaged DNA binding [GO:0003684 molecular_function] (1); nucleus [GO:0005634 cellular_component] (1); DNA repair [GO:0006281 biological_process] (1); endonuclease activity [GO:0004519 molecular_function] (1); nucleic acid binding [GO:0003676 molecular_function] (1)       | Zinc finger, CCHC-type [IPRO01878] (1); E3 ubiquitin-protein ligase family [IPRO04579] (1); Restriction endonuclease type II-like [IPRO11335] (1)                                                                                                                                                                                                                                                                                                                                 | scaffold_5_mRNA_3671.1,scaffold_7_mRNA_1856.1 | C_unshiu_00060_mRNA_78.1,C_unshiu_01813_mRNA_1.1  | -                               |
| GF0004017 | 2                             | 2                        | 0                            | Putative non-LTR retroelement reverse transcriptase (3); Putative RNA-directed DNA polymerase (1)                                                                               | nucleic acid binding [GO:0003676 molecular_function] (3); zinc ion binding [GO:0008270 molecular_function] (1)                                                                                                                                                                                                                        | Reverse transcriptase zinc-binding domain [IPRO26960] (4); Reverse transcriptase domain [IPRO04477] (4); Ribonuclease H-like domain [IPRO12337] (3); Endonuclease/exonuclease/phosphatase [IPRO05155] (3); Zinc knuckle CX2CXHXHX [IPRO25836] (1); Zinc finger, CCHC-type [IPRO01878] (1)                                                                                                                                                                                         | scaffold_5_mRNA_3259.1,scaffold_5_mRNA_3754.1 | C_unshiu_00028_mRNA_14.1,C_unshiu_00161_mRNA_16.1 | -                               |

| ID        | Num. in <i>C. caryophyllata</i> | Num. in <i>C. acutis</i> | Num. in <i>P. trifoliata</i> | Note                                                                                                                                                                                                  | GO                                                                                                                                                                                                                                                                                                                 | InterPro                                                                                                                                                                                                                                                                                                                                            | Members in <i>C. caryophyllata</i>            | Members in <i>C. acutis</i>                             | Members in <i>P. trifoliata</i> |
|-----------|---------------------------------|--------------------------|------------------------------|-------------------------------------------------------------------------------------------------------------------------------------------------------------------------------------------------------|--------------------------------------------------------------------------------------------------------------------------------------------------------------------------------------------------------------------------------------------------------------------------------------------------------------------|-----------------------------------------------------------------------------------------------------------------------------------------------------------------------------------------------------------------------------------------------------------------------------------------------------------------------------------------------------|-----------------------------------------------|---------------------------------------------------------|---------------------------------|
| GF000396  | 2                               | 2                        | 0                            | Hypothetical protein (4)                                                                                                                                                                              | response to auxin [GO:000733 biological_process] (1)                                                                                                                                                                                                                                                               | Small auxin-uric RNA [IPRO03676] (1)                                                                                                                                                                                                                                                                                                                | scaffold_5_mRNA_1946.1.scaffold_8_mRNA_1070.1 | C. unshiu_01302_mRNA_3.1.C. unshiu_01849_mRNA_3.1       |                                 |
| GF0003902 | 2                               | 2                        | 0                            | Hypothetical protein (4)                                                                                                                                                                              |                                                                                                                                                                                                                                                                                                                    | Viral movement protein [IPRO28919] (1)                                                                                                                                                                                                                                                                                                              | scaffold_5_mRNA_1638.1.scaffold_5_mRNA_2041.1 | C. unshiu_00128_mRNA_4.1.C. unshiu_00531_mRNA_3.1       |                                 |
| GF0003880 | 2                               | 2                        | 0                            | Hypothetical protein (4)                                                                                                                                                                              |                                                                                                                                                                                                                                                                                                                    |                                                                                                                                                                                                                                                                                                                                                     | scaffold_5_mRNA_1402.1.scaffold_9_mRNA_2527.1 | C. unshiu_00101_mRNA_48.1.C. unshiu_00484_mRNA_5.1      |                                 |
| GF0003851 | 2                               | 2                        | 0                            | Hypothetical protein (4)                                                                                                                                                                              |                                                                                                                                                                                                                                                                                                                    |                                                                                                                                                                                                                                                                                                                                                     | scaffold_4_mRNA_837.1.scaffold_5_mRNA_1144.1  | C. unshiu_00258_mRNA_6.1                                |                                 |
| GF0003836 | 2                               | 2                        | 0                            | Hypothetical protein (4)                                                                                                                                                                              |                                                                                                                                                                                                                                                                                                                    |                                                                                                                                                                                                                                                                                                                                                     | scaffold_4_mRNA_614.1.scaffold_4_mRNA_2991.1  | C. unshiu_01014_mRNA_3.1.C. unshiu_01202_mRNA_1.1       |                                 |
| GF0003835 | 2                               | 2                        | 0                            | cDNA clone002-110-H12, full insert sequence (4)                                                                                                                                                       | nucleic acid binding [GO:0003676 molecular_function] (4)                                                                                                                                                                                                                                                           | Ribonuclease H-like domain [IPRO12337] (4)                                                                                                                                                                                                                                                                                                          | scaffold_4_mRNA_605.1.scaffold_4_mRNA_630.1   | C. unshiu_00794_mRNA_5.1.C. unshiu_01014_mRNA_13.1      |                                 |
| GF0003832 | 2                               | 2                        | 0                            | Hypothetical protein (4)                                                                                                                                                                              | cysteine-type peptidase activity [GO:000234 molecular_function] (4); proteolysis [GO:0006508 biological_process] (4)                                                                                                                                                                                               | Alpha/Beta hydrolase fold [IPRO29058] (1); Ubiquitin-like domain [IPRO13653] (4); Domain of unknown function DUF1985 [IPRO15410] (4)                                                                                                                                                                                                                | scaffold_4_mRNA_536.1.scaffold_7_mRNA_1689.1  | C. unshiu_00236_mRNA_34.1.C. unshiu_00334_mRNA_3.1      |                                 |
| GF0003817 | 2                               | 2                        | 0                            | Potassium transporter (4)                                                                                                                                                                             | cellular_component [GO:0016020 biological_process] (4); potassium ion transmembrane transporter activity [GO:0071805 biological_process] (4); potassium ion transmembrane transporter activity [GO:0015079 molecular_function] (4)                                                                                 | Potassium transporter [IPRO03855] (4)                                                                                                                                                                                                                                                                                                               | scaffold_4_mRNA_3165.1.scaffold_4_mRNA_3167.1 | C. unshiu_00001_mRNA_292.1.C. unshiu_u_00001_mRNA_293.1 |                                 |
| GF0003816 | 2                               | 2                        | 0                            | Homogentisate solanase/transferase (2); Homogentisate phytyltransferase (1); Homogentisate phytyltransferase 1, chloroplastic (1)                                                                     | Homogentisate solanase/transferase (2); prenyltransferase activity [GO:0044659 molecular_function] (2); transferase activity, transferring alkyl or aryl (other than methyl) groups [GO:0016765 molecular_function] (2)                                                                                            | UbiA prenyltransferase family [IPRO00557] (4)                                                                                                                                                                                                                                                                                                       | scaffold_4_mRNA_3116.1.scaffold_9_mRNA_3566.1 | C. unshiu_00001_mRNA_240.1.C. unshiu_u_01328_mRNA_3.1   |                                 |
| GF0003771 | 2                               | 2                        | 0                            | Nepenthesin II (3); Putative aspartic protease (1)                                                                                                                                                    | aspartic-type endopeptidase activity [GO:0004190 molecular_function] (4); proteolysis [GO:0006508 biological_process] (4)                                                                                                                                                                                          | Peptidase family A1 domain [IPRO3121] (4); Aspartic peptidase domain [IPRO21109] (4); Aspartic peptidase, active site [IPRO1969] (4); Xylanase inhibitor, N-terminal [IPRO32861] (4); Xylanase inhibitor, C-terminal [IPRO32799] (4); Aspartic peptidase A1 family [IPRO01461] (4); Pepsin-like domain, plant [IPRO34161] (2)                       | scaffold_4_mRNA_2108.1.scaffold_4_mRNA_2111.1 | C. unshiu_00020_mRNA_6.1.C. unshiu_00020_mRNA_8.1       |                                 |
| GF0003761 | 2                               | 2                        | 0                            | Hypothetical protein (4)                                                                                                                                                                              |                                                                                                                                                                                                                                                                                                                    | NPR1/NDM1-like, C-terminal [IPRO21994] (2)                                                                                                                                                                                                                                                                                                          | scaffold_4_mRNA_1861.1.scaffold_4_mRNA_1866.1 | C. unshiu_00384_mRNA_14.1.C. unshiu_01556_mRNA_11.1     |                                 |
| GF0003760 | 2                               | 2                        | 0                            | Nonexpressor of pathogenesis-related protein 1 (3); Ankyrin repeat BTB/POZ domain-containing protein (1)                                                                                              | protein binding [GO:0005515 molecular_function] (4)                                                                                                                                                                                                                                                                | Regulatory protein NPR, central domain [IPRO24228] (4); Ankyrin repeat [IPRO02110] (4); Ankyrin repeat-containing domain [IPRO20683] (4); NPR1/NDM1-like, C-terminal [IPRO21094] (4); SKP1/BTB/POZ domain [IPRO11333] (3); BTB/POZ domain [IPRO00210] (3)                                                                                           | scaffold_4_mRNA_1860.1.scaffold_4_mRNA_1868.1 | C. unshiu_01584_mRNA_3.1.C. unshiu_02053_mRNA_3.1       |                                 |
| GF0003758 | 2                               | 2                        | 0                            | Flavone synthase II (4)                                                                                                                                                                               | iron ion binding [GO:0005506 molecular_function] (4); heme binding [GO:0020037 molecular_function] (4); oxidoreductase activity, acting on paired donors, with incorporation or reduction of molecular oxygen [GO:0016705 molecular_function] (4); oxidation-reduction process [GO:0055114 biological_process] (4) | Cytochrome P450 [IPRO01128] (4); Cytochrome P450, conserved site [IPRO17972] (4); Cytochrome P450, E-class, group 1 [IPRO02401] (4)                                                                                                                                                                                                                 | scaffold_4_mRNA_1836.1.scaffold_4_mRNA_1838.1 | C. unshiu_00428_mRNA_1.1.C. unshiu_02739_mRNA_1.1       |                                 |
| GF0003751 | 2                               | 2                        | 0                            | Hypothetical protein (4)                                                                                                                                                                              | heme binding [GO:0020037 molecular_function] (4); iron ion binding [GO:0005506 molecular_function] (4); oxidation-reduction process [GO:0055114 biological_process] (4); oxidoreductase activity, acting on paired donors, with incorporation or reduction of molecular oxygen [GO:0016705 molecular_function] (4) | Cytochrome P450 [IPRO01128] (4)                                                                                                                                                                                                                                                                                                                     | scaffold_4_mRNA_1691.1.scaffold_7_mRNA_1336.1 | C. unshiu_00240_mRNA_24.1.C. unshiu_01151_mRNA_5.1      |                                 |
| GF0003740 | 2                               | 2                        | 0                            | BED zinc finger/HAT family dimerization domain isoform 1 (2); Hypothetical protein (1); Putative zinc finger BED domain-containing protein DAY/SLEEPER-like (1)                                       | DNA binding [GO:0003677 molecular_function] (4); nucleic acid binding [GO:0003676 molecular_function] (4); protein dimerization activity [GO:0046983 molecular_function] (2)                                                                                                                                       | Ribonuclease H-like domain [IPRO12337] (4); hAT-like transposase, RNase-H fold [IPRO25525] (4); Zinc finger, BED-type [IPRO03656] (2); HAT C-terminal dimerization domain [IPRO08986] (2); Zinc finger C2H2-type [IPRO1307] (1)                                                                                                                     | scaffold_4_mRNA_1402.1.scaffold_9_mRNA_788.1  | C. unshiu_00019_mRNA_15.1.C. unshiu_00386_mRNA_2.1      |                                 |
| GF0003739 | 2                               | 2                        | 0                            | Hypothetical protein (4)                                                                                                                                                                              |                                                                                                                                                                                                                                                                                                                    | Transposase, Tap1/Eu/Spm-like [IPRO04264] (4)                                                                                                                                                                                                                                                                                                       | scaffold_4_mRNA_140.1.scaffold_6_mRNA_1418.1  | C. unshiu_00012_mRNA_17.1.C. unshiu_01022_mRNA_9.1      |                                 |
| GF0003714 | 2                               | 2                        | 0                            | MuDR family transposase isoform 1 (4)                                                                                                                                                                 | zinc ion binding [GO:0008270 molecular_function] (4)                                                                                                                                                                                                                                                               | Zinc finger, SWIM-type [IPRO07527] (4); hAT-like transposase domain [IPRO18289] (4); Transposase, MuDR, plant [IPRO04332] (4); Zinc finger, PFM2-type [IPRO06564] (2)                                                                                                                                                                               | scaffold_4_mRNA_1061.1.scaffold_5_mRNA_1060.1 | C. unshiu_00111_mRNA_26.1.C. unshiu_01132_mRNA_13.1     |                                 |
| GF0003712 | 2                               | 2                        | 0                            | Hypothetical protein (4)                                                                                                                                                                              |                                                                                                                                                                                                                                                                                                                    |                                                                                                                                                                                                                                                                                                                                                     | scaffold_4_mRNA_1037.1.scaffold_6_mRNA_111.1  | C. unshiu_00885_mRNA_10.1.C. unshiu_00932_mRNA_10.1     |                                 |
| GF0003711 | 2                               | 2                        | 0                            | Hypothetical protein (3); Retrotransposon gag protein (1)                                                                                                                                             |                                                                                                                                                                                                                                                                                                                    | Retrotransposon gag domain [IPRO05162] (2)                                                                                                                                                                                                                                                                                                          | scaffold_4_mRNA_1032.1.scaffold_4_mRNA_1086.1 | C. unshiu_00057_mRNA_1.1.C. unshiu_00097_mRNA_52.1      |                                 |
| GF0003659 | 2                               | 2                        | 0                            | Metalloendopeptidase 1 (3); Matrix metalloproteinase (1)                                                                                                                                              | zinc ion binding [GO:0008270 molecular_function] (4); metalloendopeptidase activity [GO:0004222 molecular_function] (4); metalloproteinase activity [GO:0008237 molecular_function] (4); extracellular matrix [GO:0031012 cellular_component] (4); proteolysis [GO:0006508 biological_process] (4)                 | Peptidase, metallopeptidase [IPRO06026] (4); Peptidase M10A [IPRO21190] (4); Metalloproteinase, catalytic domain [IPRO24079] (4); Peptidase M10, metalloproteinase [IPRO01818] (4); Peptidase M10A, catalytic domain [IPRO33739] (2); Peptidoglycan binding-like [IPRO2427] (1); Peptidase M10A, cysteine switch, zinc-binding site [IPRO21158] (1) | scaffold_3_mRNA_6167.1.scaffold_3_mRNA_756.1  | C. unshiu_00001_mRNA_21.1.C. unshiu_03023_mRNA_1.1      |                                 |
| GF0003511 | 2                               | 2                        | 0                            | Hypothetical protein (4)                                                                                                                                                                              | metals ion binding [GO:0048087 molecular_function] (4); glutathione gamma-glutamylcysteinyltransferase activity [GO:0016756 molecular_function] (4); phytochelatin biosynthetic process [GO:0046938 biological_process] (4); response to metal ion [GO:0010038 biological_process] (1)                             | Phytochelatin synthase, C-terminal [IPRO15407] (4)                                                                                                                                                                                                                                                                                                  | scaffold_3_mRNA_4637.1.scaffold_3_mRNA_28.1   | C. unshiu_01029_mRNA_1.1.C. unshiu_00259_mRNA_22.1      |                                 |
| GF0003497 | 2                               | 2                        | 0                            | Hypothetical protein (4)                                                                                                                                                                              |                                                                                                                                                                                                                                                                                                                    |                                                                                                                                                                                                                                                                                                                                                     | scaffold_3_mRNA_4499.1.scaffold_6_mRNA_93.1   | C. unshiu_00471_mRNA_5.1.C. unshiu_00711_mRNA_1.1       |                                 |
| GF0003492 | 2                               | 2                        | 0                            | Hypothetical protein (4)                                                                                                                                                                              | zinc ion binding [GO:0008270 molecular_function] (1); nucleic acid binding [GO:0003676 molecular_function] (1)                                                                                                                                                                                                     | Zinc finger, CCHC-type [IPRO01878] (1)                                                                                                                                                                                                                                                                                                              | scaffold_3_mRNA_3007.1.scaffold_3_mRNA_3015.1 | C. unshiu_01094_mRNA_6.1.C. unshiu_03067_mRNA_1.1       |                                 |
| GF0003353 | 2                               | 2                        | 0                            | Hypothetical protein (4)                                                                                                                                                                              |                                                                                                                                                                                                                                                                                                                    |                                                                                                                                                                                                                                                                                                                                                     | scaffold_3_mRNA_2175.1.scaffold_9_mRNA_2692.1 | C. unshiu_00226_mRNA_15.1.C. unshiu_00930_mRNA_9.1      |                                 |
| GF0003313 | 2                               | 2                        | 0                            | BED zinc finger/HAT family dimerization domain isoform 1 (2); Putative zinc finger BED domain-containing protein DAY/SLEEPER-like (2)                                                                 | protein dimerization activity [GO:0046983 molecular_function] (4); nucleic acid binding [GO:0003676 molecular_function] (4); DNA binding [GO:0003677 molecular_function] (4)                                                                                                                                       | HAT, C-terminal dimerization domain [IPRO08986] (4); Ribonuclease H-like domain [IPRO12337] (4); hAT-like transposase, RNase-H fold [IPRO25525] (4); Zinc finger C2H2-type [IPRO13087] (1); Zinc finger, BED-type [IPRO03656] (1)                                                                                                                   | scaffold_3_mRNA_2615.1.scaffold_7_mRNA_1176.1 | C. unshiu_00071_mRNA_13.1.C. unshiu_00775_mRNA_7.1      |                                 |
| GF0003279 | 2                               | 2                        | 0                            | Hypothetical protein (4)                                                                                                                                                                              |                                                                                                                                                                                                                                                                                                                    |                                                                                                                                                                                                                                                                                                                                                     | scaffold_3_mRNA_77.1.scaffold_2_mRNA_80.1     | C. unshiu_00062_mRNA_43.1.C. unshiu_01410_mRNA_2.1      |                                 |
| GF0003121 | 2                               | 2                        | 0                            | Hypothetical protein (4)                                                                                                                                                                              | protein binding [GO:0005515 molecular_function] (4)                                                                                                                                                                                                                                                                | Leucine-rich repeat domain, L domain-like [IPRO32675] (4); Leucine-rich repeat [IPRO1611] (4)                                                                                                                                                                                                                                                       | scaffold_2_mRNA_492.1.scaffold_5_mRNA_4187.1  | C. unshiu_00992_mRNA_4.1.C. unshiu_02006_mRNA_5.1       |                                 |
| GF0003118 | 2                               | 2                        | 0                            | Retrotransposon gag protein (4)                                                                                                                                                                       |                                                                                                                                                                                                                                                                                                                    | Retrotransposon gag domain [IPRO05162] (4)                                                                                                                                                                                                                                                                                                          | scaffold_2_mRNA_470.1.scaffold_4_mRNA_493.1   | C. unshiu_00061_mRNA_14.1.C. unshiu_01651_mRNA_2.1      |                                 |
| GF0003106 | 2                               | 2                        | 0                            | Retrotransposon protein, putative, unclassified (1); Hypothetical protein (1); Non-LTR retroelement reverse transcriptase-like protein (1); RNA-directed DNA polymerase; Ribonuclease H, putative (1) | nucleic acid binding [GO:0003676 molecular_function] (2)                                                                                                                                                                                                                                                           | Endonuclease/exonuclease/phosphatase domain [IPRO04077] (2); Reverse transcriptase zinc-binding domain [IPRO20960] (2); Ribonuclease H-like domain [IPRO12337] (2); Zinc knuckle CXXCXXHXK [IPRO28396] (3); Domain of unknown function DUF4283 [IPRO25558] (1)                                                                                      | scaffold_2_mRNA_438.1.scaffold_6_mRNA_1770.1  | C. unshiu_00187_mRNA_4.1.C. unshiu_00244_mRNA_30.1      |                                 |
| GF0003101 | 2                               | 2                        | 0                            | Hypothetical protein (4)                                                                                                                                                                              | nucleic acid binding [GO:0003676 molecular_function] (4); zinc ion binding [GO:0008270 molecular_function] (4)                                                                                                                                                                                                     | Zinc finger, CCHC-type [IPRO01878] (4)                                                                                                                                                                                                                                                                                                              | scaffold_2_mRNA_424.1.scaffold_3_mRNA_2484.1  | C. unshiu_00526_mRNA_8.1.C. unshiu_01871_mRNA_3.1       |                                 |
| GF0003082 | 2                               | 2                        | 0                            | Hypothetical protein (4)                                                                                                                                                                              | nucleic acid binding [GO:0003676 molecular_function] (2)                                                                                                                                                                                                                                                           | Ribonuclease H-like domain [IPRO12337] (2)                                                                                                                                                                                                                                                                                                          | scaffold_2_mRNA_378.1.scaffold_8_mRNA_1796.1  | C. unshiu_00246_mRNA_22.1.C. unshiu_01290_mRNA_8.1      |                                 |
| GF0003039 | 2                               | 2                        | 0                            | Hypothetical protein (4)                                                                                                                                                                              |                                                                                                                                                                                                                                                                                                                    |                                                                                                                                                                                                                                                                                                                                                     | scaffold_2_mRNA_306.1.scaffold_6_mRNA_228.1   | C. unshiu_00502_mRNA_23.1.C. unshiu_02445_mRNA_4.1      |                                 |
| GF0003038 | 2                               | 2                        | 0                            | Receptor like protein 33 (2); Receptor like protein 27 (2)                                                                                                                                            | protein binding [GO:0005515 molecular_function] (2)                                                                                                                                                                                                                                                                | Leucine-rich repeat domain, L domain-like [IPRO32675] (4); Leucine-rich repeat [IPRO1611] (2); Leucine-rich repeat-containing N-terminal, plant-type [IPRO13210] (1); Leucine-rich repeat, typical subtype [IPRO03591] (1)                                                                                                                          | scaffold_2_mRNA_3059.1.scaffold_2_mRNA_3067.1 | C. unshiu_00863_mRNA_4.1.C. unshiu_01163_mRNA_8.1       |                                 |
| GF0003026 | 2                               | 2                        | 0                            | Hypothetical protein (4)                                                                                                                                                                              |                                                                                                                                                                                                                                                                                                                    |                                                                                                                                                                                                                                                                                                                                                     | scaffold_2_mRNA_2857.1.scaffold_2_mRNA_2858.1 | C. unshiu_00722_mRNA_7.1.C. unshiu_00722_mRNA_8.1       |                                 |

| ID        | Num. in <i>C. caryocarpum</i> | Num. in <i>C. acanthum</i> | Num. in <i>P. trifoliata</i> | Note                                                                                                                                                                                                                                                                                                                            | GO                                                                                                                                                                                                                                                                                                                                                                                                                  | InterPro                                                                                                                                                                                                                                                                                                                                                                                                                                                                                                               | Members in <i>C. caryocarpum</i>              | Members in <i>C. acanthum</i>                                                                      | Members in <i>P. trifoliata</i> |
|-----------|-------------------------------|----------------------------|------------------------------|---------------------------------------------------------------------------------------------------------------------------------------------------------------------------------------------------------------------------------------------------------------------------------------------------------------------------------|---------------------------------------------------------------------------------------------------------------------------------------------------------------------------------------------------------------------------------------------------------------------------------------------------------------------------------------------------------------------------------------------------------------------|------------------------------------------------------------------------------------------------------------------------------------------------------------------------------------------------------------------------------------------------------------------------------------------------------------------------------------------------------------------------------------------------------------------------------------------------------------------------------------------------------------------------|-----------------------------------------------|----------------------------------------------------------------------------------------------------|---------------------------------|
| GF0003001 | 2                             | 2                          | 0                            | Hypothetical protein (3); Protein FARI-RELATED SEQUENCE 6 (1)                                                                                                                                                                                                                                                                   | regulation of transcription, DNA-templated [GO:0006355] biological process (4); zinc ion binding [GO:0008270 molecular_function] (2)                                                                                                                                                                                                                                                                                | FHY3/FAR1 family [IPR01052] (4); Zinc finger, SWIM-type [IPR0527] (2); Zinc finger, PMZ-type [IPR006564] (2); FARI DNA binding domain [IPR004330] (2)                                                                                                                                                                                                                                                                                                                                                                  | scaffold_2_mRNA_2561.1,scaffold_8_mRNA_1152.1 | C. ushii_00211_mRNA_22.1,C. ushii_00682_mRNA_10.1                                                  |                                 |
| GF0002991 | 2                             | 2                          | 0                            | Hypothetical protein (4)                                                                                                                                                                                                                                                                                                        |                                                                                                                                                                                                                                                                                                                                                                                                                     |                                                                                                                                                                                                                                                                                                                                                                                                                                                                                                                        | scaffold_2_mRNA_2384.1,scaffold_7_mRNA_1319.1 | C. ushii_00138_mRNA_11.1,C. ushii_00655_mRNA_6.1                                                   |                                 |
| GF0002985 | 2                             | 2                          | 0                            | Hypothetical protein (4)                                                                                                                                                                                                                                                                                                        |                                                                                                                                                                                                                                                                                                                                                                                                                     | Retrosposon gag domain [IPR05162] (1)                                                                                                                                                                                                                                                                                                                                                                                                                                                                                  | scaffold_2_mRNA_2203.1,scaffold_9_mRNA_1680.1 | C. ushii_00508_mRNA_7.1,C. ushii_00683_mRNA_4.1                                                    |                                 |
| GF0002961 | 2                             | 2                          | 0                            | UDP-glucosyltransferase 74E2 (4)                                                                                                                                                                                                                                                                                                | metabolic process [GO:0008152] biological process (4); transferase activity, transferring hexosyl groups [GO:018758 molecular_function] (4)                                                                                                                                                                                                                                                                         | UDP-glucuronosyl/UDP-glucosyltransferase [IPR02213] (4)                                                                                                                                                                                                                                                                                                                                                                                                                                                                | scaffold_2_mRNA_1959.1,scaffold_2_mRNA_3226.1 | C. ushii_00030_mRNA_34.1,C. ushii_00141_mRNA_12.1                                                  |                                 |
| GF0002894 | 2                             | 2                          | 0                            | Syntaxin 81 (3); Hypothetical protein (1)                                                                                                                                                                                                                                                                                       | vesicle-mediated transport [GO:0016192] biological process (4); membrane [GO:0016020 cellular_component] (4); ribosome [GO:0005840] cellular_component (1); structural constituent of ribosome [GO:0003735 molecular_function] (1); translation [GO:0006412 biological_process] (1); intracellular [GO:0005622 cellular_component] (1)                                                                              | SNARE-complex protein Syntaxin-18, N-terminal [IPR019529] (4); t-SNARE [IPR010959] (2); SVARE [IPR010989] (2); Translation protein, beta-barrel domain [IPR009000] (1); Ribosomal protein L35A [IPR001780] (1)                                                                                                                                                                                                                                                                                                         | scaffold_2_mRNA_1064.1,scaffold_4_mRNA_40.1   | C. ushii_00168_mRNA_31.1,C. ushii_00235_mRNA_13.1                                                  |                                 |
| GF0002879 | 2                             | 2                          | 0                            | Hypothetical protein (4)                                                                                                                                                                                                                                                                                                        |                                                                                                                                                                                                                                                                                                                                                                                                                     |                                                                                                                                                                                                                                                                                                                                                                                                                                                                                                                        | scaffold_1_mRNA_760.1,scaffold_1_mRNA_770.1   | C. ushii_00075_mRNA_3.1,C. ushii_01122_mRNA_2.1                                                    |                                 |
| GF0002851 | 2                             | 2                          | 0                            | Hypothetical protein (3); Protein FARI-RELATED SEQUENCE 11 (1)                                                                                                                                                                                                                                                                  | regulation of transcription, DNA-templated [GO:0006355] biological process (4); zinc ion binding [GO:0008270 molecular_function] (2)                                                                                                                                                                                                                                                                                | FARI DNA binding domain [IPR004330] (4); FHY3/FAR1 family [IPR01052] (4); Zinc finger, PMZ-type [IPR006564] (2); Zinc finger, SWIM-type [IPR00527] (2)                                                                                                                                                                                                                                                                                                                                                                 | scaffold_1_mRNA_355.1,scaffold_7_mRNA_1193.1  | C. ushii_00365_mRNA_19.1,C. ushii_02037_mRNA_3.1                                                   |                                 |
| GF0002838 | 2                             | 2                          | 0                            | Hypothetical protein (2); Putative sugar phosphate/phosphate translocator (2)                                                                                                                                                                                                                                                   |                                                                                                                                                                                                                                                                                                                                                                                                                     | Acyl-CoA N-acyltransferase [IPR016181] (1); Peptidoglycan biosynthesis/recognition [IPR007434] (1)                                                                                                                                                                                                                                                                                                                                                                                                                     | scaffold_1_mRNA_3476.1,scaffold_5_mRNA_262.1  | C. ushii_00164_mRNA_28.1,C. ushii_00449_mRNA_14.1                                                  |                                 |
| GF0002807 | 2                             | 2                          | 0                            | Hypothetical protein (4)                                                                                                                                                                                                                                                                                                        | strictosidine synthase activity [GO:0016844 molecular_function] (4); biosynthetic process [GO:0009058 biological_process] (4)                                                                                                                                                                                                                                                                                       | Six-bladed beta-propeller, Toll-like [IPR011042] (4); Strictosidine synthase, conserved region [IPR018119] (4); Strictosidine synthase [IPR004411] (4)                                                                                                                                                                                                                                                                                                                                                                 | scaffold_1_mRNA_292.1,scaffold_1_mRNA_298.1   | C. ushii_01113_mRNA_1.1,C. ushii_02657_mRNA_3.1                                                    |                                 |
| GF0002780 | 2                             | 2                          | 0                            | Hypothetical protein (4)                                                                                                                                                                                                                                                                                                        |                                                                                                                                                                                                                                                                                                                                                                                                                     | Transposase-associated domain [IPR029480] (1)                                                                                                                                                                                                                                                                                                                                                                                                                                                                          | scaffold_1_mRNA_2549.1,scaffold_9_mRNA_1981.1 | C. ushii_00036_mRNA_53.1,C. ushii_02530_mRNA_1.1                                                   |                                 |
| GF0002758 | 2                             | 2                          | 0                            | Hypothetical protein (4)                                                                                                                                                                                                                                                                                                        |                                                                                                                                                                                                                                                                                                                                                                                                                     |                                                                                                                                                                                                                                                                                                                                                                                                                                                                                                                        | scaffold_1_mRNA_2266.1,scaffold_5_mRNA_3824.1 | C. ushii_00274_mRNA_32.1,C. ushii_01384_mRNA_2.1                                                   |                                 |
| GF0002725 | 2                             | 2                          | 0                            | Hypothetical protein (3); Cysteine-rich O.R.K. (RECEPTOR-like protein kinase) 8 (1)                                                                                                                                                                                                                                             |                                                                                                                                                                                                                                                                                                                                                                                                                     | Gag-polyprotein of LTR copia-type [IPR029472] (4); Reverse transcriptase, RNA-dependent DNA polymerase [IPR01103] (1)                                                                                                                                                                                                                                                                                                                                                                                                  | scaffold_1_mRNA_1614.1,scaffold_8_mRNA_1191.1 | C. ushii_00910_mRNA_7.1,C. ushii_02557_mRNA_2.1                                                    |                                 |
| GF0002716 | 2                             | 2                          | 0                            | Hypothetical protein (4)                                                                                                                                                                                                                                                                                                        |                                                                                                                                                                                                                                                                                                                                                                                                                     |                                                                                                                                                                                                                                                                                                                                                                                                                                                                                                                        | scaffold_1_mRNA_1514.1,scaffold_6_mRNA_572.1  | C. ushii_00756_mRNA_14.1,C. ushii_01623_mRNA_6.1                                                   |                                 |
| GF0002713 | 2                             | 2                          | 0                            | Hypothetical protein (4)                                                                                                                                                                                                                                                                                                        |                                                                                                                                                                                                                                                                                                                                                                                                                     |                                                                                                                                                                                                                                                                                                                                                                                                                                                                                                                        | scaffold_1_mRNA_1487.1,scaffold_5_mRNA_2505.1 | C. ushii_00145_mRNA_68.1,C. ushii_00756_mRNA_12.1                                                  |                                 |
| GF0002711 | 2                             | 2                          | 0                            | Hypothetical protein (4)                                                                                                                                                                                                                                                                                                        | nucleic acid binding [GO:0003676 molecular_function] (4); zinc ion binding [GO:0008270 molecular_function] (4)                                                                                                                                                                                                                                                                                                      | Zinc finger, CCHC-type [IPR001878] (4)                                                                                                                                                                                                                                                                                                                                                                                                                                                                                 | scaffold_1_mRNA_1461.1,scaffold_3_mRNA_1927.1 | C. ushii_00374_mRNA_1.1,C. ushii_01568_mRNA_16.1                                                   |                                 |
| GF0002701 | 2                             | 2                          | 0                            | Hypothetical protein (4)                                                                                                                                                                                                                                                                                                        |                                                                                                                                                                                                                                                                                                                                                                                                                     |                                                                                                                                                                                                                                                                                                                                                                                                                                                                                                                        | scaffold_1_mRNA_1260.1,scaffold_1_mRNA_1313.1 | C. ushii_00242_mRNA_21.1,C. ushii_00270_mRNA_18.1                                                  |                                 |
| GF0002693 | 2                             | 2                          | 0                            | Hypothetical protein (4)                                                                                                                                                                                                                                                                                                        |                                                                                                                                                                                                                                                                                                                                                                                                                     |                                                                                                                                                                                                                                                                                                                                                                                                                                                                                                                        | scaffold_1_mRNA_1143.1,scaffold_5_mRNA_1278.1 | C. ushii_00191_mRNA_3.1,C. ushii_00899_mRNA_12.1                                                   |                                 |
| GF0002689 | 2                             | 2                          | 0                            | Hypothetical protein (4)                                                                                                                                                                                                                                                                                                        | nucleic acid binding [GO:0003676 molecular_function] (4)                                                                                                                                                                                                                                                                                                                                                            | Ribonuclease H-like domain [IPR012337] (4)                                                                                                                                                                                                                                                                                                                                                                                                                                                                             | scaffold_1_mRNA_1106.1,scaffold_9_mRNA_1664.1 | C. ushii_00007_mRNA_11.1,C. ushii_00308_mRNA_2.1                                                   |                                 |
| GF0002441 | 2                             | 3                          | 0                            | Non-LTR retroelement reverse transcriptase-like (2); RNA-directed DNA polymerase (Reverse transcriptase), RNA-DNA hybrid ribonuclease activity [GO:0004523 molecular_function] (4); H fold-like protein (1); Putative non-LTR retroelement reverse transcriptase (1); RNA-directed DNA polymerase (Reverse transcriptase) 4 (1) | Reverse transcriptase, RNA-dependent DNA polymerase [IPR000477] (2); Endonuclease/exonuclease/phosphatase [IPR005135] (1)                                                                                                                                                                                                                                                                                           | Ribonuclease H domain [IPR002156] (4); Ribonuclease H-like domain [IPR012337] (4); Reverse transcriptase zinc-binding domain [IPR029600] (4); Reverse transcriptase domain [IPR000477] (2); Endonuclease/exonuclease/phosphatase [IPR005135] (1)                                                                                                                                                                                                                                                                       | scaffold_7_mRNA_1209.1,scaffold_9_mRNA_1975.1 | C. ushii_00290_mRNA_23.1,C. ushii_00455_mRNA_12.1,C. ushii_00957_mRNA_8.1                          |                                 |
| GF0002386 | 2                             | 3                          | 0                            | Lactosylceramide 4-alpha-galactosyltransferase, putative (5)                                                                                                                                                                                                                                                                    |                                                                                                                                                                                                                                                                                                                                                                                                                     | Glycosyltransferase, DXD sugar-binding motif [IPR007577] (5); Alpha 1,4-glycosyltransferase domain [IPR00652] (5); Nucleotide-diphosphate-sugar transferases [IPR029044] (5)                                                                                                                                                                                                                                                                                                                                           | scaffold_6_mRNA_1763.1,scaffold_6_mRNA_1764.1 | C. ushii_00473_mRNA_22.1,C. ushii_00473_mRNA_24.1,C. ushii_00779_mRNA_12.1                         |                                 |
| GF0002298 | 2                             | 3                          | 0                            | Hypothetical protein (5)                                                                                                                                                                                                                                                                                                        |                                                                                                                                                                                                                                                                                                                                                                                                                     |                                                                                                                                                                                                                                                                                                                                                                                                                                                                                                                        | scaffold_5_mRNA_3565.1,scaffold_7_mRNA_2585.1 | C. ushii_00372_mRNA_25.1,C. ushii_00618_mRNA_8.1,C. ushii_01187_mRNA_3.1                           |                                 |
| GF0002047 | 2                             | 3                          | 0                            | Hypothetical protein (5)                                                                                                                                                                                                                                                                                                        |                                                                                                                                                                                                                                                                                                                                                                                                                     |                                                                                                                                                                                                                                                                                                                                                                                                                                                                                                                        | scaffold_3_mRNA_3478.2,scaffold_3_mRNA_3482.1 | C. ushii_00381_mRNA_10.1,C. ushii_01092_mRNA_1.1,C. ushii_02920_mRNA_1.2                           |                                 |
| GF0001924 | 2                             | 3                          | 0                            | Verticillium wilt resistance-like protein (4); Receptor like protein 33 (1)                                                                                                                                                                                                                                                     | protein binding [GO:0005515 molecular_function] (5)                                                                                                                                                                                                                                                                                                                                                                 | Leucine-rich repeat domain, L domain-like [IPR032675] (5); Leucine-rich repeat, typical subtype [IPR003591] (5); Leucine-rich repeat [IPR01611] (5); Reverse transcriptase, RNA-dependent DNA polymerase [IPR013103] (1); Leucine rich repeat 4 [IPR025875] (1)                                                                                                                                                                                                                                                        | scaffold_2_mRNA_3837.1,scaffold_2_mRNA_3842.1 | C. ushii_00185_mRNA_30.1,C. ushii_00185_mRNA_32.1,C. ushii_00185_mRNA_34.1                         |                                 |
| GF0001870 | 2                             | 3                          | 0                            | UDP-glucosyltransferase 74E2 (5)                                                                                                                                                                                                                                                                                                | metabolic process [GO:0008152] biological process (5); transferase activity, transferring hexosyl groups [GO:018758 molecular_function] (5)                                                                                                                                                                                                                                                                         | UDP-glucuronosyl/UDP-glucosyltransferase [IPR02213] (5)                                                                                                                                                                                                                                                                                                                                                                                                                                                                | scaffold_2_mRNA_1966.1,scaffold_2_mRNA_3228.1 | C. ushii_00030_mRNA_27.1,C. ushii_00141_mRNA_14.1,C. ushii_01801_mRNA_3.1                          |                                 |
| GF0001786 | 2                             | 3                          | 0                            | Hypothetical protein (2); Transposase (1); Putative zinc finger BED domain-containing protein DAYSLPEER-like (1); Transposable element Ac (1)                                                                                                                                                                                   | nucleic acid binding [GO:0003676 molecular_function] (5); protein dimerization activity [GO:0046983 molecular_function] (4); DNA binding [GO:0000677 molecular_function] (4); metabolic process [GO:0008152 biological_process] (2); lyase activity [GO:0016289 molecular_function] (2); terpenase synthase activity [GO:0010333 molecular_function] (2); magnesium ion binding [GO:0000287 molecular_function] (2) | Ribonuclease H-like domain [IPR012337] (5); HAT, C-terminal dimerisation domain [IPR008906] (4); hAT-like transposase, RNase-H fold [IPR025555] (3); Zinc finger, BED-type [IPR003656] (3); Terpene synthase, metal-binding domain [IPR005630] (2); Terpene synthase, N-terminal domain [IPR01986] (2); Terpenoid cyclases/protein prenyltransferase alpha-alpha torsion [IPR008930] (2); Isoprenoid synthase domain [IPR008949] (2); Transposase, Mu/DR, plant [IPR004332] (1); Zinc finger C2H2-type [IPR013087] (1) | scaffold_1_mRNA_2390.1,scaffold_7_mRNA_1011.1 | C. ushii_01083_mRNA_2.1,C. ushii_01083_mRNA_3.1,C. ushii_01818_mRNA_5.1                            |                                 |
| GF0001752 | 2                             | 3                          | 0                            | Hypothetical protein (5)                                                                                                                                                                                                                                                                                                        |                                                                                                                                                                                                                                                                                                                                                                                                                     |                                                                                                                                                                                                                                                                                                                                                                                                                                                                                                                        | scaffold_1_mRNA_1626.1,scaffold_5_mRNA_588.1  | C. ushii_00667_mRNA_12.1,C. ushii_01140_mRNA_20.1,C. ushii_01753_mRNA_3.1                          |                                 |
| GF0001570 | 2                             | 4                          | 0                            | Hypothetical protein (3); Ulp1 protease 0 family, carboxy-terminal domain protein (2); Recombination RecR (1)                                                                                                                                                                                                                   | ADP binding [GO:0043531 molecular_function] (1)                                                                                                                                                                                                                                                                                                                                                                     | Transposase, Top1/En/Spm-like [IPR004264] (6); Probable transposase, Pta/En/Spm, plant [IPR00232] (4); P-loop containing nucleoside triphosphate hydrolase [IPR027417] (1); NB-ARC [IPR02182] (1)                                                                                                                                                                                                                                                                                                                      | scaffold_6_mRNA_1077.1,scaffold_8_mRNA_2227.1 | C. ushii_00167_mRNA_2.1,C. ushii_00328_mRNA_13.1,C. ushii_00365_mRNA_30.1,C. ushii_01555_mRNA_1.1  |                                 |
| GF0001561 | 2                             | 4                          | 0                            | Hypothetical protein (6)                                                                                                                                                                                                                                                                                                        |                                                                                                                                                                                                                                                                                                                                                                                                                     |                                                                                                                                                                                                                                                                                                                                                                                                                                                                                                                        | scaffold_5_mRNA_679.1,scaffold_6_mRNA_66.1    | C. ushii_00458_mRNA_4.1,C. ushii_02240_mRNA_2.1,C. ushii_02495_mRNA_2.1                            |                                 |
| GF0001535 | 2                             | 4                          | 0                            | Hypothetical protein (2); Polynucleotidyl transferase, Ribonuclease H fold (2); Non-LTR retroelement reverse transcriptase-like (1); Putative non-LTR retroelement reverse transcriptase (1)                                                                                                                                    | nucleic acid binding [GO:0003676 molecular_function] (6)                                                                                                                                                                                                                                                                                                                                                            | Ribonuclease H-like domain [IPR012337] (6); Reverse transcriptase zinc-binding domain [IPR029600] (6); Endonuclease/exonuclease/phosphatase [IPR005135] (2)                                                                                                                                                                                                                                                                                                                                                            | scaffold_5_mRNA_3483.1,scaffold_7_mRNA_1291.1 | C. ushii_00010_mRNA_35.1,C. ushii_00049_mRNA_23.1,C. ushii_00199_mRNA_10.1,C. ushii_01929_mRNA_8.1 |                                 |
| GF0001519 | 2                             | 4                          | 0                            | Disease resistance protein (CC-NBS-LRR class) family protein (3); NBS-LRR type disease resistance protein (2); Disease resistance protein (1)                                                                                                                                                                                   | ADP binding [GO:0043531 molecular_function] (6)                                                                                                                                                                                                                                                                                                                                                                     | Leucine-rich repeat domain, L domain-like [IPR032675] (6); P-loop containing nucleoside triphosphate hydrolase [IPR027417] (6); NB-ARC [IPR002182] (6); AAN/ATPase domain [IPR003593] (5); Winged helix-turn-helix DNA-binding domain [IPR011991] (2)                                                                                                                                                                                                                                                                  | scaffold_5_mRNA_2795.1,scaffold_5_mRNA_2837.1 | C. ushii_00263_mRNA_25.1,C. ushii_01408_mRNA_2.1,C. ushii_01783_mRNA_5.1,C. ushii_02128_mRNA_2.1   |                                 |
| GF0001463 | 2                             | 4                          | 0                            | Hypothetical protein (6)                                                                                                                                                                                                                                                                                                        |                                                                                                                                                                                                                                                                                                                                                                                                                     |                                                                                                                                                                                                                                                                                                                                                                                                                                                                                                                        | scaffold_4_mRNA_2630.1,scaffold_8_mRNA_2098.1 | C. ushii_00010_mRNA_95.1,C. ushii_00114_mRNA_11.1,C. ushii_00178_mRNA_18.1,C. ushii_01364_mRNA_4.1 |                                 |
| GF0001454 | 2                             | 4                          | 0                            | Hypothetical protein (6)                                                                                                                                                                                                                                                                                                        | protein binding [GO:0005515 molecular_function] (1)                                                                                                                                                                                                                                                                                                                                                                 | Leucine-rich repeat domain, L domain-like [IPR032675] (1); Leucine-rich repeat, typical subtype [IPR003591] (1); Leucine-rich repeat-containing N-terminal, plant-type [IPR013210] (1); Leucine-rich repeat [IPR01611] (1)                                                                                                                                                                                                                                                                                             | scaffold_4_mRNA_2055.1,scaffold_5_mRNA_988.1  | C. ushii_00083_mRNA_29.1,C. ushii_00104_mRNA_23.1,C. ushii_00387_mRNA_5.1,C. ushii_00830_mRNA_3.1  |                                 |
| GF0001431 | 2                             | 4                          | 0                            | Adipocyte plasma membrane-associated 0 protein (4); Putative strictosidine synthase (2)                                                                                                                                                                                                                                         | strictosidine synthase activity [GO:0016844 molecular_function] (6); biosynthetic process [GO:0009058 biological_process] (6)                                                                                                                                                                                                                                                                                       | Strictosidine synthase, conserved region [IPR018119] (6); Strictosidine synthase [IPR004411] (6); Six-bladed beta-propeller, Toll-like [IPR011042] (6)                                                                                                                                                                                                                                                                                                                                                                 | scaffold_4_mRNA_1046.1,scaffold_4_mRNA_1278.1 | C. ushii_00777_mRNA_8.1,C. ushii_00809_mRNA_5.1,C. ushii_00932_mRNA_1.1,C. ushii_02303_mRNA_6.1    |                                 |
| GF0001283 | 2                             | 4                          | 0                            | Hypothetical protein (6)                                                                                                                                                                                                                                                                                                        |                                                                                                                                                                                                                                                                                                                                                                                                                     | Transposase, Mu/DR, plant [IPR004432] (6); Nucleic acid transposase domain [IPR018289] (3)                                                                                                                                                                                                                                                                                                                                                                                                                             | scaffold_2_mRNA_511.1,scaffold_5_mRNA_355.1   | C. ushii_00015_mRNA_61.1,C. ushii_00016_mRNA_55.1,C. ushii_00062_mRNA_25.1,C. ushii_00147_mRNA_6.1 |                                 |
| GF0001280 | 2                             | 4                          | 0                            | Hypothetical protein (6)                                                                                                                                                                                                                                                                                                        |                                                                                                                                                                                                                                                                                                                                                                                                                     |                                                                                                                                                                                                                                                                                                                                                                                                                                                                                                                        | scaffold_2_mRNA_473.1,scaffold_8_mRNA_1389.1  | C. ushii_00056_mRNA_53.1,C. ushii_00061_mRNA_17.1,C. ushii_00489_mRNA_3.1,C. ushii_00944_mRNA_1.1  |                                 |
| GF0001272 | 2                             | 4                          | 0                            | Hypothetical protein (6)                                                                                                                                                                                                                                                                                                        |                                                                                                                                                                                                                                                                                                                                                                                                                     | Leucine-rich repeat domain, L domain-like [IPR032675] (4)                                                                                                                                                                                                                                                                                                                                                                                                                                                              | scaffold_2_mRNA_4295.1,scaffold_2_mRNA_4417.1 | C. ushii_00015_mRNA_76.1,C. ushii_00151_mRNA_7.1,C. ushii_00667_mRNA_7.1,C. ushii_01889_mRNA_4.1   |                                 |

| ID        | Num in <i>C. clementinae</i> | Num in <i>C. uschii</i> | Num in <i>P. trifoliata</i> | Note                                                                                                                                                                                                                                                                              | GO                                                                                                                                                                                                                                                                                                                                 | InterPro                                                                                                                                                                                                                                                                                                                                     | Members in <i>C. clementinae</i>              | Members in <i>C. uschii</i>                                                                                                                          | Members in <i>P. trifoliata</i> |
|-----------|------------------------------|-------------------------|-----------------------------|-----------------------------------------------------------------------------------------------------------------------------------------------------------------------------------------------------------------------------------------------------------------------------------|------------------------------------------------------------------------------------------------------------------------------------------------------------------------------------------------------------------------------------------------------------------------------------------------------------------------------------|----------------------------------------------------------------------------------------------------------------------------------------------------------------------------------------------------------------------------------------------------------------------------------------------------------------------------------------------|-----------------------------------------------|------------------------------------------------------------------------------------------------------------------------------------------------------|---------------------------------|
| GF0001231 | 2                            | 4                       | 0                           | Hypothetical protein (6)                                                                                                                                                                                                                                                          |                                                                                                                                                                                                                                                                                                                                    |                                                                                                                                                                                                                                                                                                                                              | scaffold_2_mRNA_2444.1,scaffold_9_mRNA_2230.1 | C.uschii_00128_mRNA_15.1,C.uschii_00174_mRNA_36.1,C.uschii_01765_mRNA_3.1,C.uschii_02091_mRNA_2.1                                                    |                                 |
| GF0001157 | 2                            | 4                       | 0                           | Hypothetical protein (6)                                                                                                                                                                                                                                                          |                                                                                                                                                                                                                                                                                                                                    |                                                                                                                                                                                                                                                                                                                                              | scaffold_1_mRNA_2521.1,scaffold_8_mRNA_2294.1 | C.uschii_00364_mRNA_19.1,C.uschii_00702_mRNA_9.1,C.uschii_02577_mRNA_1.1,C.uschii_02841_mRNA_1.1                                                     |                                 |
| GF0001146 | 2                            | 4                       | 0                           | Hypothetical protein (6)                                                                                                                                                                                                                                                          |                                                                                                                                                                                                                                                                                                                                    |                                                                                                                                                                                                                                                                                                                                              | scaffold_1_mRNA_2214.1,scaffold_1_mRNA_782.1  | C.uschii_00247_mRNA_29.1,C.uschii_00247_mRNA_31.1,C.uschii_00888_mRNA_3.1,C.uschii_01591_mRNA_10.1                                                   |                                 |
| GF0000971 | 2                            | 5                       | 0                           | Retrotransposon gag protein (7)                                                                                                                                                                                                                                                   |                                                                                                                                                                                                                                                                                                                                    | Retrotransposon gag domain [IPRO05162] (7)                                                                                                                                                                                                                                                                                                   | scaffold_5_mRNA_1502.1,scaffold_6_mRNA_858.1  | C.uschii_00187_mRNA_2.1,C.uschii_00228_mRNA_45.1,C.uschii_00274_mRNA_2.1,C.uschii_00304_mRNA_15.1,C.uschii_02726_mRNA_3.1                            |                                 |
| GF0000942 | 2                            | 5                       | 0                           | Hypothetical protein (7)                                                                                                                                                                                                                                                          |                                                                                                                                                                                                                                                                                                                                    |                                                                                                                                                                                                                                                                                                                                              | scaffold_3_mRNA_6280.1,scaffold_5_mRNA_5232.1 | C.uschii_00051_mRNA_14.1,C.uschii_00051_mRNA_15.1,C.uschii_00309_mRNA_22.1,C.uschii_01012_mRNA_6.1,C.uschii_03148_mRNA_1.1                           |                                 |
| GF0000835 | 2                            | 5                       | 0                           | Hypothetical protein (7)                                                                                                                                                                                                                                                          |                                                                                                                                                                                                                                                                                                                                    |                                                                                                                                                                                                                                                                                                                                              | scaffold_2_mRNA_1892.1,scaffold_6_mRNA_472.1  | C.uschii_00104_mRNA_17.1,C.uschii_00470_mRNA_25.1,C.uschii_01424_mRNA_5.1,C.uschii_02033_mRNA_3.1,C.uschii_02338_mRNA_5.1                            |                                 |
| GF0000748 | 2                            | 6                       | 0                           | Hypothetical protein (4); Polyprotein (2); RNA-directed DNA polymerase (Reverse transcriptase); Zinc finger. C CCHC-type; Peptidase aspartic, active site; Retrotransposon gag protein (1); Putative polyprotein (Aspartic proteinase, reverse transcriptase, ribonuclease H) (1) | zinc ion binding [GO:0008270]<br>RNA-directed DNA polymerase [GO:0003076]<br>C CCHC-type; Peptidase aspartic, active site; Retrotransposon gag protein (1); Putative polyprotein (Aspartic proteinase, reverse transcriptase, ribonuclease H) (1) [GO:0006508 biological_process] (5)                                              | Zinc finger, CCHC-type [IPRO01878] (7); Peptidase A2A, retrovirus, catalytic [IPRO1995] (5); Reverse transcriptase domain [IPRO04077] (3); Retrospovims [IPRO18061] (5); Aspartic peptidase domain [IPRO21109] (3)                                                                                                                           | scaffold_8_mRNA_1614.1,scaffold_9_mRNA_2228.1 | C.uschii_00074_mRNA_66.1,C.uschii_00074_mRNA_68.1,C.uschii_00138_mRNA_51.1,C.uschii_00145_mRNA_1.1,C.uschii_00479_mRNA_5.1,C.uschii_01893_mRNA_8.1   |                                 |
| GF0000731 | 2                            | 6                       | 0                           | Hypothetical protein (8)                                                                                                                                                                                                                                                          |                                                                                                                                                                                                                                                                                                                                    |                                                                                                                                                                                                                                                                                                                                              | scaffold_6_mRNA_457.1,scaffold_8_mRNA_1570.1  | C.uschii_00350_mRNA_3.1,C.uschii_00350_mRNA_32.1,C.uschii_00408_mRNA_16.1,C.uschii_01245_mRNA_11.1,C.uschii_01374_mRNA_8.1,C.uschii_01503_mRNA_7.1   |                                 |
| GF0000623 | 2                            | 6                       | 0                           | Hypothetical protein (8)                                                                                                                                                                                                                                                          |                                                                                                                                                                                                                                                                                                                                    |                                                                                                                                                                                                                                                                                                                                              | scaffold_2_mRNA_2938.1,scaffold_4_mRNA_1091.1 | C.uschii_00014_mRNA_116.1,C.uschii_00029_mRNA_87.1,C.uschii_00055_mRNA_48.1,C.uschii_00271_mRNA_4.1,C.uschii_00984_mRNA_13.1,C.uschii_01350_mRNA_3.1 |                                 |
| GF0000566 | 2                            | 7                       | 0                           | Hypothetical protein (7); Specific tissue protein 1, putative (1); Pea shoot-specific protein (1)                                                                                                                                                                                 |                                                                                                                                                                                                                                                                                                                                    | Organ specific protein [IPRO24489] (9)                                                                                                                                                                                                                                                                                                       | scaffold_8_mRNA_741.1,scaffold_8_mRNA_756.1   | C.uschii_00085_mRNA_8.1,C.uschii_00432_mRNA_17.1,C.uschii_01007_mRNA_3.1,C.uschii_01565_mRNA_2.1,C.uschii_02149_mRNA_3.1,C.uschii_02763_mRNA_2.1     |                                 |
| GF0024944 | 1                            | 1                       | 0                           | Hypothetical protein (2)                                                                                                                                                                                                                                                          |                                                                                                                                                                                                                                                                                                                                    |                                                                                                                                                                                                                                                                                                                                              | scaffold_9_mRNA_992.1                         | C.uschii_00161_mRNA_30.1                                                                                                                             |                                 |
| GF0024943 | 1                            | 1                       | 0                           | Hypothetical protein (2)                                                                                                                                                                                                                                                          |                                                                                                                                                                                                                                                                                                                                    |                                                                                                                                                                                                                                                                                                                                              | scaffold_9_mRNA_990.1                         | C.uschii_00161_mRNA_34.1                                                                                                                             |                                 |
| GF0024941 | 1                            | 1                       | 0                           | LRR receptor-like kinase family protein (2)                                                                                                                                                                                                                                       | protein binding [GO:0005515]<br>molecular_function (2)                                                                                                                                                                                                                                                                             | Leucine-rich repeat domain, L domain-like [IPRO32675] (2); Leucine-rich repeat [IPRO01611] (2); Leucine-rich repeat-containing N-terminal, plant-type [IPRO13210] (2)                                                                                                                                                                        | scaffold_9_mRNA_987.1                         | C.uschii_00307_mRNA_6.1                                                                                                                              |                                 |
| GF0024940 | 1                            | 1                       | 0                           | Hypothetical protein (2)                                                                                                                                                                                                                                                          | serine-type endopeptidase activity [GO:0004252 molecular_function] (2); proteolysis [GO:0006508 biological_process] (2)                                                                                                                                                                                                            | Peptidase S8/S53 domain [IPRO0209] (2); Peptidase S8, subtilisin-related [IPRO15500] (1)                                                                                                                                                                                                                                                     | scaffold_9_mRNA_986.1                         | C.uschii_00287_mRNA_19.1                                                                                                                             |                                 |
| GF0024939 | 1                            | 1                       | 0                           | Hypothetical protein (2)                                                                                                                                                                                                                                                          | protein binding [GO:0005515]<br>molecular_function (2)                                                                                                                                                                                                                                                                             | Leucine-rich repeat [IPRO01611] (2); Leucine-rich repeat, typical subtype [IPRO03591] (2); Leucine-rich repeat domain, L domain-like [IPRO32675] (2)                                                                                                                                                                                         | scaffold_9_mRNA_985.1                         | C.uschii_00307_mRNA_7.1                                                                                                                              |                                 |
| GF0024938 | 1                            | 1                       | 0                           | Nuclear transport factor 2 family protein with RNA binding domain isoform 2 (2)                                                                                                                                                                                                   | nucleic acid binding [GO:0003676 molecular_function] (2); intracellular [GO:0005622 cellular_component] (2); transport [GO:0006810 biological_process] (2); nucleotide binding [GO:0000166 molecular_function] (1)                                                                                                                 | NT2-like domain [IPRO23710] (2); Nuclear transport factor 2 [IPRO02075] (2); Nuclear transport factor 2, eukaryote [IPRO18222] (2); RNA recognition motif domain [IPRO00594] (2); Nucleotide-binding alpha-beta plat domain [IPRO12677] (1)                                                                                                  | scaffold_9_mRNA_982.1                         | C.uschii_00307_mRNA_10.1                                                                                                                             |                                 |
| GF0024937 | 1                            | 1                       | 0                           | Pentatricopeptide (PPR) repeat protein (2)                                                                                                                                                                                                                                        | protein binding [GO:0005515]<br>molecular_function (2)                                                                                                                                                                                                                                                                             | Pentatricopeptide repeat [IPRO02885] (2); Tetra- or pentapeptide-like helical domain [IPRO11990] (2)                                                                                                                                                                                                                                         | scaffold_9_mRNA_980.1                         | C.uschii_00307_mRNA_12.1                                                                                                                             |                                 |
| GF0024936 | 1                            | 1                       | 0                           | Hypothetical protein (2)                                                                                                                                                                                                                                                          |                                                                                                                                                                                                                                                                                                                                    |                                                                                                                                                                                                                                                                                                                                              | scaffold_9_mRNA_979.1                         | C.uschii_00307_mRNA_13.1                                                                                                                             |                                 |
| GF0024935 | 1                            | 1                       | 0                           | Zinc finger protein CONSTANS-LIKE 4 (2)                                                                                                                                                                                                                                           | protein binding [GO:0005515]<br>molecular_function (2)                                                                                                                                                                                                                                                                             | CCT domain [IPRO10402] (2)                                                                                                                                                                                                                                                                                                                   | scaffold_9_mRNA_972.1                         | C.uschii_00307_mRNA_21.1                                                                                                                             |                                 |
| GF0024934 | 1                            | 1                       | 0                           | Peptide transporter PTR3-A (2)                                                                                                                                                                                                                                                    | membrane [GO:0016020 cellular_component] (2); transport [GO:0006810 biological_process] (2); transporter activity [GO:0005215 molecular_function] (2)                                                                                                                                                                              | Proton-dependent oligopeptide transporter family [IPRO00109] (2); Major facilitator superfamily domain [IPRO20846] (2)                                                                                                                                                                                                                       | scaffold_9_mRNA_957.1                         | C.uschii_01048_mRNA_5.1                                                                                                                              |                                 |
| GF0024933 | 1                            | 1                       | 0                           | Hypothetical protein (2)                                                                                                                                                                                                                                                          | ATPase activity [GO:0016887 molecular_function] (2); ATP binding [GO:0005524 molecular_function] (2)                                                                                                                                                                                                                               | S-adenosyl-L-methionine-dependent methyltransferase [IPRO29065] (1)                                                                                                                                                                                                                                                                          | scaffold_9_mRNA_950.1                         | C.uschii_01048_mRNA_11.1                                                                                                                             |                                 |
| GF0024932 | 1                            | 1                       | 0                           | Hypothetical protein (2)                                                                                                                                                                                                                                                          |                                                                                                                                                                                                                                                                                                                                    |                                                                                                                                                                                                                                                                                                                                              | scaffold_9_mRNA_947.1                         | C.uschii_00959_mRNA_12.1                                                                                                                             |                                 |
| GF0024931 | 1                            | 1                       | 0                           | Hypothetical protein (2)                                                                                                                                                                                                                                                          |                                                                                                                                                                                                                                                                                                                                    |                                                                                                                                                                                                                                                                                                                                              | scaffold_9_mRNA_944.1                         | C.uschii_00146_mRNA_1.1                                                                                                                              |                                 |
| GF0024930 | 1                            | 1                       | 0                           | Hypothetical protein (2)                                                                                                                                                                                                                                                          |                                                                                                                                                                                                                                                                                                                                    |                                                                                                                                                                                                                                                                                                                                              | scaffold_9_mRNA_937.1                         | C.uschii_00146_mRNA_8.1                                                                                                                              |                                 |
| GF0024929 | 1                            | 1                       | 0                           | Cyclopropane-fatty-acyl-phospholipid synthase (1); Hypothetical protein (1)                                                                                                                                                                                                       | oxidoreductase activity [GO:0016491 molecular_function] (1); oxidation-reduction process [GO:0055114 biological_process] (1)                                                                                                                                                                                                       | ABC transporter-like [IPRO03439] (2); P-loop containing nucleoside triphosphate hydrolase [IPRO27417] (2)                                                                                                                                                                                                                                    | scaffold_9_mRNA_936.1                         | C.uschii_00146_mRNA_7.1                                                                                                                              |                                 |
| GF0024928 | 1                            | 1                       | 0                           | Hypothetical protein (2)                                                                                                                                                                                                                                                          |                                                                                                                                                                                                                                                                                                                                    |                                                                                                                                                                                                                                                                                                                                              | scaffold_9_mRNA_934.1                         | C.uschii_00146_mRNA_11.1                                                                                                                             |                                 |
| GF0024926 | 1                            | 1                       | 0                           | Hypothetical protein (2)                                                                                                                                                                                                                                                          | protein peptidyl-prolyl isomerization [GO:0000413 biological_process] (2); protein folding [GO:0006457 biological_process] (2); nucleic acid binding [GO:0003676 molecular_function] (2); peptidyl-prolyl cis-trans isomerase activity [GO:0003755 molecular_function] (2); nucleotide binding [GO:0000166 molecular_function] (1) | RNA recognition motif domain [IPRO00504] (2); Cyclophilin-like domain [IPRO29000] (2); Cyclophilin-type peptidyl-prolyl cis-trans isomerase domain [IPRO02130] (2); Ferritin-related domain [IPRO12347] (1); Nucleotide-binding alpha-beta plat domain [IPRO12677] (1); Cyclophilin-type peptidyl-prolyl cis-trans isomerase [IPRO24936] (1) | scaffold_9_mRNA_931.1                         | C.uschii_00007_mRNA_94.1                                                                                                                             |                                 |
| GF0024924 | 1                            | 1                       | 0                           | Hypothetical protein (2)                                                                                                                                                                                                                                                          |                                                                                                                                                                                                                                                                                                                                    |                                                                                                                                                                                                                                                                                                                                              | scaffold_9_mRNA_913.1                         | C.uschii_00146_mRNA_32.1                                                                                                                             |                                 |
| GF0024923 | 1                            | 1                       | 0                           | Hypothetical protein (2)                                                                                                                                                                                                                                                          |                                                                                                                                                                                                                                                                                                                                    |                                                                                                                                                                                                                                                                                                                                              | scaffold_9_mRNA_907.1                         | C.uschii_00146_mRNA_37.1                                                                                                                             |                                 |
| GF0024922 | 1                            | 1                       | 0                           | Hypothetical protein (2)                                                                                                                                                                                                                                                          |                                                                                                                                                                                                                                                                                                                                    |                                                                                                                                                                                                                                                                                                                                              | scaffold_9_mRNA_902.1                         | C.uschii_01125_mRNA_1.1                                                                                                                              |                                 |
| GF0024920 | 1                            | 1                       | 0                           | Hypothetical protein (2)                                                                                                                                                                                                                                                          |                                                                                                                                                                                                                                                                                                                                    |                                                                                                                                                                                                                                                                                                                                              | scaffold_9_mRNA_888.1                         | C.uschii_00329_mRNA_9.1                                                                                                                              |                                 |
| GF0024918 | 1                            | 1                       | 0                           | 60S ribosomal protein L36 (2)                                                                                                                                                                                                                                                     | translation [GO:0006412 biological_process] (2); intracellular [GO:0005622 cellular_component] (2); structural constituent of ribosome [GO:0003735 molecular_function] (2); ribosome [GO:0005840 cellular_component] (2)                                                                                                           | Ribosomal protein L36e [IPRO00509] (2)                                                                                                                                                                                                                                                                                                       | scaffold_9_mRNA_879.1                         | C.uschii_00396_mRNA_1.1                                                                                                                              |                                 |
| GF0024917 | 1                            | 1                       | 0                           | Hypothetical protein (2)                                                                                                                                                                                                                                                          |                                                                                                                                                                                                                                                                                                                                    |                                                                                                                                                                                                                                                                                                                                              | scaffold_9_mRNA_875.1                         | C.uschii_00396_mRNA_4.1                                                                                                                              |                                 |
| GF0024916 | 1                            | 1                       | 0                           | Hypothetical protein (2)                                                                                                                                                                                                                                                          | ubiquitin protein ligase binding [GO:0011625 molecular_function] (2); ubiquitin-dependent protein catabolic process [GO:0006511 biological_process] (2)                                                                                                                                                                            | Cullin, N-terminal [IPRO01373] (2); Cullin repeat-like-containing domain [IPRO16139] (2)                                                                                                                                                                                                                                                     | scaffold_9_mRNA_872.1                         | C.uschii_00396_mRNA_7.1                                                                                                                              |                                 |
| GF0024914 | 1                            | 1                       | 0                           | Hypothetical protein (2)                                                                                                                                                                                                                                                          |                                                                                                                                                                                                                                                                                                                                    |                                                                                                                                                                                                                                                                                                                                              | scaffold_9_mRNA_871.1                         | C.uschii_00007_mRNA_99.1                                                                                                                             |                                 |
| GF0024913 | 1                            | 1                       | 0                           | Hypothetical protein (2)                                                                                                                                                                                                                                                          |                                                                                                                                                                                                                                                                                                                                    |                                                                                                                                                                                                                                                                                                                                              | scaffold_9_mRNA_867.1                         | C.uschii_00396_mRNA_12.1                                                                                                                             |                                 |
| GF0024912 | 1                            | 1                       | 0                           | Hypothetical protein (2)                                                                                                                                                                                                                                                          |                                                                                                                                                                                                                                                                                                                                    |                                                                                                                                                                                                                                                                                                                                              | scaffold_9_mRNA_854.1                         | C.uschii_00057_mRNA_56.1                                                                                                                             |                                 |
| GF0024910 | 1                            | 1                       | 0                           | 11S globulin (2)                                                                                                                                                                                                                                                                  | nutrient reservoir activity [GO:0045735 molecular_function] (2)                                                                                                                                                                                                                                                                    | Splicing factor 2B subunit 5/RDS3 complex subunit 10 [IPRO09846] (2)<br>RmlC-like cupin domain [IPRO11051] (2); RmlC-like jelly roll fold [IPRO14710] (2); 11-S seed storage protein, conserved site [IPRO22379] (2); Cupin 1 [IPRO06045] (2); 11-S seed storage protein, plant [IPRO06044] (2)                                              | scaffold_9_mRNA_845.2                         | C.uschii_00057_mRNA_47.1                                                                                                                             |                                 |
| GF0024908 | 1                            | 1                       | 0                           | Hypothetical protein (2)                                                                                                                                                                                                                                                          |                                                                                                                                                                                                                                                                                                                                    |                                                                                                                                                                                                                                                                                                                                              | scaffold_9_mRNA_824.1                         | C.uschii_00164_mRNA_15.1                                                                                                                             |                                 |
| GF0024907 | 1                            | 1                       | 0                           | Hypothetical protein (2)                                                                                                                                                                                                                                                          |                                                                                                                                                                                                                                                                                                                                    |                                                                                                                                                                                                                                                                                                                                              | scaffold_9_mRNA_822.1                         | C.uschii_00164_mRNA_16.1                                                                                                                             |                                 |
| GF0024906 | 1                            | 1                       | 0                           | Hypothetical protein (2)                                                                                                                                                                                                                                                          |                                                                                                                                                                                                                                                                                                                                    |                                                                                                                                                                                                                                                                                                                                              | scaffold_9_mRNA_821.1                         | C.uschii_00164_mRNA_17.1                                                                                                                             |                                 |
| GF0024905 | 1                            | 1                       | 0                           | Hypothetical protein (2)                                                                                                                                                                                                                                                          |                                                                                                                                                                                                                                                                                                                                    |                                                                                                                                                                                                                                                                                                                                              | scaffold_9_mRNA_819.1                         | C.uschii_00164_mRNA_19.1                                                                                                                             |                                 |
| GF0024904 | 1                            | 1                       | 0                           | Repetitive proline-rich cell wall protein 1 (2)                                                                                                                                                                                                                                   |                                                                                                                                                                                                                                                                                                                                    |                                                                                                                                                                                                                                                                                                                                              | scaffold_9_mRNA_818.1                         | C.uschii_00164_mRNA_20.1                                                                                                                             |                                 |
| GF0024903 | 1                            | 1                       | 0                           | Putative retroelement pol polyprotein (2)                                                                                                                                                                                                                                         |                                                                                                                                                                                                                                                                                                                                    |                                                                                                                                                                                                                                                                                                                                              | scaffold_9_mRNA_815.1                         | C.uschii_00164_mRNA_22.1                                                                                                                             |                                 |
| GF0024902 | 1                            | 1                       | 0                           | Hypothetical protein (2)                                                                                                                                                                                                                                                          |                                                                                                                                                                                                                                                                                                                                    | Domain of unknown function DUF4283 [IPRO25583] (2); Endonuclease/exonuclease/phosphatase [IPRO05135] (1); Zinc knuckle CX2CX4HX4C [IPRO25836] (1)                                                                                                                                                                                            | scaffold_9_mRNA_812.1                         | C.uschii_00164_mRNA_25.1                                                                                                                             |                                 |
| GF0024901 | 1                            | 1                       | 0                           | Ethylene-responsive transcription factor ERF098 (2)                                                                                                                                                                                                                               | DNA binding [GO:0003677 molecular_function] (2); regulation of transcription, DNA-templated [GO:0006355 biological_process] (2); transcription factor activity, sequence-specific DNA binding [GO:0003700 molecular_function] (2)                                                                                                  | AP2/ERF domain [IPRO01471] (2); DNA-binding domain [IPRO16177] (2)                                                                                                                                                                                                                                                                           | scaffold_9_mRNA_810.1                         | C.uschii_00164_mRNA_27.1                                                                                                                             |                                 |
| GF0024898 | 1                            | 1                       | 0                           | Hypothetical protein (2)                                                                                                                                                                                                                                                          |                                                                                                                                                                                                                                                                                                                                    |                                                                                                                                                                                                                                                                                                                                              | scaffold_9_mRNA_796.1                         | C.uschii_01106_mRNA_8.1                                                                                                                              |                                 |
| GF0024897 | 1                            | 1                       | 0                           | Hypothetical protein (2)                                                                                                                                                                                                                                                          |                                                                                                                                                                                                                                                                                                                                    |                                                                                                                                                                                                                                                                                                                                              | scaffold_9_mRNA_792.1                         | C.uschii_01106_mRNA_4.1                                                                                                                              |                                 |

| ID        | Num. in <i>C. clementinae</i> | Num. in <i>C. acutis</i> | Num. in <i>P. trifoliata</i> | Note                                                                                                                   | GO                                                                                                                                                                                                                                                                                                                                                                                | InterPro                                                                                                                                                                                                                                                                                                                                                              | Members in <i>C. clementinae</i> | Members in <i>C. acutis</i> | Members in <i>P. trifoliata</i> |
|-----------|-------------------------------|--------------------------|------------------------------|------------------------------------------------------------------------------------------------------------------------|-----------------------------------------------------------------------------------------------------------------------------------------------------------------------------------------------------------------------------------------------------------------------------------------------------------------------------------------------------------------------------------|-----------------------------------------------------------------------------------------------------------------------------------------------------------------------------------------------------------------------------------------------------------------------------------------------------------------------------------------------------------------------|----------------------------------|-----------------------------|---------------------------------|
| GF0024896 | 1                             | 1                        | 0                            | 1-aminocyclopropane-1-carboxylate oxidase like 12 (2)                                                                  | oxidoreductase activity [GO:0016491 molecular_function] (2); oxidation-reduction process [GO:0055114 biological_process] (2)                                                                                                                                                                                                                                                      | Isopenicillin N synthase-like [IPR07443] (2); Non-heme dioxygenase N-terminal domain [IPR026992] (2); Orogulate/iron-dependent dioxygenase [IPR005123] (2)                                                                                                                                                                                                            | caffold_9_mRNA_787.1             | C_unshiu_00386_mRNA_3.1     | -                               |
| GF0024895 | 1                             | 1                        | 0                            | Hypothetical protein (2)                                                                                               | DNA binding [GO:0003677 molecular_function] (2); nucleic acid binding [GO:0003676 molecular_function] (1)                                                                                                                                                                                                                                                                         | Zinc finger, BED-type [IPR003656] (2); Zinc finger C2H2-type [IPR013087] (1)                                                                                                                                                                                                                                                                                          | caffold_9_mRNA_786.1             | C_unshiu_00386_mRNA_4.1     | -                               |
| GF0024894 | 1                             | 1                        | 0                            | Hypothetical protein (2)                                                                                               |                                                                                                                                                                                                                                                                                                                                                                                   | Pentapeptide repeat [IPR02885] (2); Cw19-like, C-terminal domain-1 [IPR006788] (2); Cw19-like protein, C-terminal domain-2 [IPR006767] (2)                                                                                                                                                                                                                            | caffold_9_mRNA_773.1             | C_unshiu_00410_mRNA_4.1     | -                               |
| GF0024893 | 1                             | 1                        | 0                            | Hypothetical protein (2)                                                                                               |                                                                                                                                                                                                                                                                                                                                                                                   |                                                                                                                                                                                                                                                                                                                                                                       | caffold_9_mRNA_772.1             | C_unshiu_00410_mRNA_2.1     | -                               |
| GF0024891 | 1                             | 1                        | 0                            | Hypothetical protein (2)                                                                                               |                                                                                                                                                                                                                                                                                                                                                                                   |                                                                                                                                                                                                                                                                                                                                                                       | caffold_9_mRNA_759.1             | C_unshiu_00052_mRNA_67.1    | -                               |
| GF0024889 | 1                             | 1                        | 0                            | Hypothetical protein (2)                                                                                               | cellulose biosynthetic process [GO:0030244 biological_process] (1); membrane [GO:0016020 cellular_component] (1); cellulose synthase (UDP-forming) activity [GO:0016760 molecular_function] (1)                                                                                                                                                                                   | Protein of unknown function DUF247, plant [IPR004158] (2); Cellulose synthase [IPR005150] (1)                                                                                                                                                                                                                                                                         | caffold_9_mRNA_751.1             | C_unshiu_00052_mRNA_57.1    | -                               |
| GF0024887 | 1                             | 1                        | 0                            | StAR-related lipid transfer protein 7, mitochondrial (2)                                                               | lipid binding [GO:0008289 molecular_function] (2)                                                                                                                                                                                                                                                                                                                                 | START-like domain [IPR023393] (2); START domain [IPR02913] (2)                                                                                                                                                                                                                                                                                                        | caffold_9_mRNA_734.1             | C_unshiu_00445_mRNA_14.1    | -                               |
| GF0024886 | 1                             | 1                        | 0                            | P-loop nucleoside triphosphate hydrolysis superfamily protein (2)                                                      | ATP binding [GO:0005254 molecular_function] (2); kinase activity [GO:0016501 molecular_function] (2)                                                                                                                                                                                                                                                                              | P-loop containing nucleoside triphosphate hydrolase [IPR027417] (2); Zeta toxin domain [IPR01488] (2)                                                                                                                                                                                                                                                                 | caffold_9_mRNA_731.1             | C_unshiu_00445_mRNA_12.1    | -                               |
| GF0024885 | 1                             | 1                        | 0                            | Histone H1 (2)                                                                                                         | nucleosome [GO:0000786 cellular_component] (2); nucleosome assembly [GO:0006334 biological_process] (2); DNA binding [GO:0006677 molecular_function] (2); nucleus [GO:0005634 cellular_component] (2)                                                                                                                                                                             | Histone H1 [IPR005819] (2); Linker histone H1H5, domain H15 [IPR005818] (2); Winged helix-turn-helix DNA-binding domain [IPR011991] (2)                                                                                                                                                                                                                               | caffold_9_mRNA_730.1             | C_unshiu_00445_mRNA_11.1    | -                               |
| GF0024884 | 1                             | 1                        | 0                            | 40S ribosomal protein S15 (2)                                                                                          | ribosome [GO:0005840 cellular_component] (2); RNA binding [GO:0003723 molecular_function] (2); small ribosomal subunit [GO:0015935 cellular_component] (2); structural constituent of ribosome [GO:0003735 molecular_function] (2); translation [GO:0006412 biological_process] (2)                                                                                               | Ribosomal protein S19 conserved site [IPR020934] (2); Ribosomal protein S19, superfamily [IPR023575] (2); Ribosomal protein S19A/S15e [IPR006713] (2); Ribosomal protein S19/S15 [IPR002222] (2)                                                                                                                                                                      | caffold_9_mRNA_729.2             | C_unshiu_00445_mRNA_10.2    | -                               |
| GF0024883 | 1                             | 1                        | 0                            | Ankyrin repeat family protein, putative (2)                                                                            | protein binding [GO:0005515 molecular_function] (2); integral component of membrane [GO:0016021 cellular_component] (1); cellular response to salicylic acid stimulus [GO:0071446 biological_process] (1); regulation of salicylic acid mediated signaling pathway [GO:2000031 biological_process] (1); regulation of defense response [GO:0033347 biological_process] (1)        | PGG domain [IPR026961] (2); Ankyrin repeat-containing domain [IPR020683] (2); Ankyrin repeat [IPR002110] (2); Protein accelerated cell death 6 [IPR032846] (1)                                                                                                                                                                                                        | caffold_9_mRNA_722.1             | C_unshiu_01876_mRNA_3.1     | -                               |
| GF0024882 | 1                             | 1                        | 0                            | Ankyrin repeat family protein, putative (2)                                                                            | protein binding [GO:0005515 molecular_function] (2); regulation of defense response [GO:2000031 biological_process] (1); integral component of membrane [GO:0016021 cellular_component] (1); cellular response to salicylic acid stimulus [GO:0071446 biological_process] (1)                                                                                                     | Ankyrin repeat [IPR002110] (2); PGG domain [IPR026961] (2); Ankyrin repeat-containing domain [IPR020683] (2); Protein accelerated cell death 6 [IPR032846] (1)                                                                                                                                                                                                        | caffold_9_mRNA_711.1             | C_unshiu_00436_mRNA_30.1    | -                               |
| GF0024881 | 1                             | 1                        | 0                            | Hypothetical protein (2)                                                                                               | protein binding [GO:0005515 molecular_function] (2); response to oxidative stress [GO:0006979 biological_process] (1); chloroplast [GO:0009007 cellular_component] (1)                                                                                                                                                                                                            | Ankyrin repeat [IPR002110] (2); Ankyrin repeat-containing domain [IPR020683] (2)                                                                                                                                                                                                                                                                                      | caffold_9_mRNA_710.1             | C_unshiu_00436_mRNA_28.1    | -                               |
| GF0024878 | 1                             | 1                        | 0                            | NAD(P)H dehydrogenase 18 (2)                                                                                           | response to oxidative stress [GO:0006979 biological_process] (1); chloroplast [GO:0009007 cellular_component] (1)                                                                                                                                                                                                                                                                 | Photosynthetic NDH subunit of subcomplex B 5, chloroplast [IPR034569] (1)                                                                                                                                                                                                                                                                                             | caffold_9_mRNA_695.1             | C_unshiu_00436_mRNA_12.1    | -                               |
| GF0024877 | 1                             | 1                        | 0                            | Hypothetical protein (2)                                                                                               |                                                                                                                                                                                                                                                                                                                                                                                   | EF-Hand 1, calcium-binding site [IPR018247] (2); EF-hand domain [IPR002048] (2); EF-hand domain pair [IPR011992] (2)                                                                                                                                                                                                                                                  | caffold_9_mRNA_683.1             | C_unshiu_00436_mRNA_3.1     | -                               |
| GF0024874 | 1                             | 1                        | 0                            | Calmodulin (2)                                                                                                         | calcium ion binding [GO:0005509 molecular_function] (2)                                                                                                                                                                                                                                                                                                                           | EF-Hand 1, calcium-binding site [IPR018247] (2); EF-hand domain [IPR002048] (2); EF-hand domain pair [IPR011992] (2)                                                                                                                                                                                                                                                  | caffold_9_mRNA_667.1             | C_unshiu_00298_mRNA_14.1    | -                               |
| GF0024873 | 1                             | 1                        | 0                            | 1,2-dihydroxy-3-keto-5-methylthiopentane dioxygenase 4 (1); 1,2-dihydroxy-3-keto-5-methylthiopentane dioxygenase 2 (1) | acredactone dioxygenase [iron]-requiring activity [GO:0010309 molecular_function] (1); L-methionine salvage from methylthioadenosine [GO:0015509 biological_process] (1); oxidoreductase activity [GO:0016491 molecular_function] (1); oxidation-reduction process [GO:0055114 biological_process] (1)                                                                            | RmlC-like jelly roll fold [IPR014710] (1); RmlC-like cupin domain [IPR11051] (1); 1,2-dihydroxy-3-keto-5-methylthiopentane dioxygenase, eukaryotes [IPR027496] (1); Aciredactone dioxygenase ARD family [IPR004313] (1)                                                                                                                                               | caffold_9_mRNA_644.2             | C_unshiu_00101_mRNA_29.1    | -                               |
| GF0024872 | 1                             | 1                        | 0                            | Hypothetical protein (2)                                                                                               |                                                                                                                                                                                                                                                                                                                                                                                   |                                                                                                                                                                                                                                                                                                                                                                       | caffold_9_mRNA_639.1             | C_unshiu_00101_mRNA_34.1    | -                               |
| GF0024871 | 1                             | 1                        | 0                            | Leucine-rich repeat receptor-like protein kinase family (2)                                                            | protein binding [GO:0005515 molecular_function] (2)                                                                                                                                                                                                                                                                                                                               | Leucine-rich repeat domain, L domain-like [IPR02675] (2); Leucine-rich repeat [IPR01611] (2); Leucine-rich repeat-containing N-terminal, plant-type [IPR013210] (2)                                                                                                                                                                                                   | caffold_9_mRNA_627.1             | C_unshiu_00101_mRNA_53.1    | -                               |
| GF0024870 | 1                             | 1                        | 0                            | Hypothetical protein (2)                                                                                               |                                                                                                                                                                                                                                                                                                                                                                                   |                                                                                                                                                                                                                                                                                                                                                                       | caffold_9_mRNA_626.1             | C_unshiu_00085_mRNA_51.1    | -                               |
| GF0024869 | 1                             | 1                        | 0                            | Hypothetical protein (2)                                                                                               | ATP binding [GO:0005254 molecular_function] (2); protein phosphorylation [GO:0006468 biological_process] (2); protein kinase activity [GO:0004672 molecular_function] (2)                                                                                                                                                                                                         | Protein kinase-like domain [IPR011009] (2); Protein kinase domain [IPR000719] (2); Serine/threonine/tyrosine-specific protein kinase, catalytic domain [IPR002290] (1)                                                                                                                                                                                                | caffold_9_mRNA_614.1             | C_unshiu_00369_mRNA_7.1     | -                               |
| GF0024868 | 1                             | 1                        | 0                            | Hypothetical protein (2)                                                                                               |                                                                                                                                                                                                                                                                                                                                                                                   |                                                                                                                                                                                                                                                                                                                                                                       | caffold_9_mRNA_605.1             | C_unshiu_00369_mRNA_17.1    | -                               |
| GF0024867 | 1                             | 1                        | 0                            | Ribosomal protein L19 (2)                                                                                              | translation [GO:0006412 biological_process] (2); intracellular [GO:0005622 cellular_component] (2); structural constituent of ribosome [GO:0003735 molecular_function] (2); ribosome [GO:0005840 cellular_component] (2); cytosolic large ribosomal subunit [GO:0022625 cellular_component] (1)                                                                                   | Ribosomal protein L19L19e, domain 3 [IPR015974] (2); Ribosomal protein L19L19e, domain 1 [IPR015972] (2); Ribosomal protein L19L19e conserved site [IPR023658] (2); Ribosomal protein L19L19e, domain 2 [IPR015973] (1); Ribosomal protein L19L19e [IPR00196] (1); Ribosomal protein L19L19e domain [IPR00196] (1); Ribosomal protein L19, eukaryotic [IPR033935] (1) | caffold_9_mRNA_602.1             | C_unshiu_00369_mRNA_20.1    | -                               |
| GF0024866 | 1                             | 1                        | 0                            | Hypothetical protein (2)                                                                                               |                                                                                                                                                                                                                                                                                                                                                                                   |                                                                                                                                                                                                                                                                                                                                                                       | caffold_9_mRNA_597.1             | C_unshiu_00254_mRNA_42.1    | -                               |
| GF0024864 | 1                             | 1                        | 0                            | Cysteine synthase (2)                                                                                                  | cysteine biosynthetic process from serine [GO:0006535 biological_process] (2); cysteine synthase activity [GO:0004124 molecular_function] (2)                                                                                                                                                                                                                                     | Cysteine synthase [IPR005856] (2); Cysteine synthase/cystathionine beta-synthase, pyridoxal-phosphate attachment site [IPR01216] (2); Tryptophan synthase beta subunit-like PLP-dependent enzyme [IPR019256] (2); Cysteine synthase CysK [IPR005859] (2)                                                                                                              | caffold_9_mRNA_575.1             | C_unshiu_00254_mRNA_24.1    | -                               |
| GF0024861 | 1                             | 1                        | 0                            | Amine oxidase (flavin-containing) (2)                                                                                  | primary amine oxidase activity [GO:0008131 molecular_function] (2); copper ion binding [GO:0005507 molecular_function] (2); oxidation-reduction process [GO:0055114 biological_process] (2); quinone binding [GO:0040308 molecular_function] (2); amine metabolic process [GO:0009308 biological_process] (2)                                                                     | Copper amine oxidase, C-terminal [IPR015798] (2); Copper amine oxidase, N-terminal [IPR016182] (2); Copper amine oxidase, N3-terminal [IPR015802] (2); Copper amine oxidase, N2-terminal [IPR015800] (2); Copper amine oxidase [IPR00269] (2)                                                                                                                         | caffold_9_mRNA_554.1             | C_unshiu_00254_mRNA_4.1     | -                               |
| GF0024860 | 1                             | 1                        | 0                            | Amine oxidase (flavin-containing) (2)                                                                                  | primary amine oxidase activity [GO:0008131 molecular_function] (2); amine metabolic process [GO:0009308 biological_process] (2); quinone binding [GO:0040308 molecular_function] (2); oxidation-reduction process [GO:0055114 biological_process] (2); copper ion binding [GO:0005507 molecular_function] (2); primary amine oxidase activity [GO:0008131 molecular_function] (2) | Copper amine oxidase, N2-terminal [IPR015800] (2); Copper amine oxidase, N3-terminal [IPR015802] (2); Copper amine oxidase, C-terminal [IPR015798] (2)                                                                                                                                                                                                                | caffold_9_mRNA_553.1             | C_unshiu_00254_mRNA_3.1     | -                               |
| GF0024859 | 1                             | 1                        | 0                            | G-type lectin S-receptor-like 0 serine/threonine-protein kinase RLK1 (1); Hypothetical protein (1)                     | protein phosphorylation [GO:0006468 biological_process] (2); protein kinase activity [GO:0004672 molecular_function] (2); ATP binding [GO:0005254 molecular_function] (2)                                                                                                                                                                                                         | Protein kinase-like domain [IPR011009] (2); Protein kinase domain [IPR000719] (2)                                                                                                                                                                                                                                                                                     | caffold_9_mRNA_548.1             | C_unshiu_00126_mRNA_56.1    | -                               |
| GF0024858 | 1                             | 1                        | 0                            | Amine oxidase (flavin-containing) (2)                                                                                  | primary amine oxidase activity [GO:0008131 molecular_function] (2); amine metabolic process [GO:0009308 biological_process] (2); quinone binding [GO:0040308 molecular_function] (2); copper ion binding [GO:0005507 molecular_function] (2); oxidation-reduction process [GO:0055114 biological_process] (2)                                                                     | Copper amine oxidase, C-terminal [IPR015798] (2); Copper amine oxidase [IPR00269] (2); Copper amine oxidase, N-terminal [IPR016182] (1); Copper amine oxidase, N2-terminal [IPR015800] (1)                                                                                                                                                                            | caffold_9_mRNA_546.1             | C_unshiu_00126_mRNA_58.1    | -                               |
| GF0024856 | 1                             | 1                        | 0                            | Hypothetical protein (2)                                                                                               |                                                                                                                                                                                                                                                                                                                                                                                   |                                                                                                                                                                                                                                                                                                                                                                       | caffold_9_mRNA_523.1             | C_unshiu_00051_mRNA_51.1    | -                               |
| GF0024855 | 1                             | 1                        | 0                            | Ribonuclease P/MRP protein subunit POPS (2)                                                                            | ribonuclease activity [GO:0004540 molecular_function] (1); RNA processing [GO:0008033 biological_process] (1)                                                                                                                                                                                                                                                                     | Ribonuclease P/MRP protein subunit [IPR02759] (1)                                                                                                                                                                                                                                                                                                                     | caffold_9_mRNA_522.1             | C_unshiu_00051_mRNA_50.1    | -                               |
| GF0024854 | 1                             | 1                        | 0                            | Ondogenetic ameloblast-associated (2)                                                                                  |                                                                                                                                                                                                                                                                                                                                                                                   |                                                                                                                                                                                                                                                                                                                                                                       | caffold_9_mRNA_500.1             | C_unshiu_00051_mRNA_32.1    | -                               |



| ID        | Num. in <i>C. clementinae</i> | Num. in <i>C. acutis</i> | Num. in <i>P. trifoliata</i> | Note                                                                                                              | GO                                                                                                                                                                                                                                                                                                                                                  | InterPro                                                                                                                                                                                                                                                                                                                                                                                                                                   | Members in <i>C. clementinae</i> | Members in <i>C. acutis</i> | Members in <i>P. trifoliata</i> |
|-----------|-------------------------------|--------------------------|------------------------------|-------------------------------------------------------------------------------------------------------------------|-----------------------------------------------------------------------------------------------------------------------------------------------------------------------------------------------------------------------------------------------------------------------------------------------------------------------------------------------------|--------------------------------------------------------------------------------------------------------------------------------------------------------------------------------------------------------------------------------------------------------------------------------------------------------------------------------------------------------------------------------------------------------------------------------------------|----------------------------------|-----------------------------|---------------------------------|
| GF0024853 | 1                             | 1                        | 0                            | NEDD8-activating enzyme E1 catalytic subunit (2)                                                                  | NEDD8-activating enzyme activity [GO:019781 molecular_function] (2);<br>small protein activating enzyme activity [GO:0008641 molecular_function] (2);<br>ATP binding [GO:0005254 molecular_function] (2); acid-aminoacyl ligase activity [GO:0016881 molecular_function] (2); protein neddylation [GO:0045116 biological_process] (2)               | TH1F-type NAD/FAD binding fold [IPR000594] (2); E2 binding [IPR014929] (2); NEDD8-activating enzyme E1 catalytic subunit [IPR030468] (2); Ubiquitin-activating enzyme E1, Cys scaffold_9_mRNA_499.2 active site [IPR033127] (2); NAD(P)-binding domain [IPR016040] (1); Ubiquitin activating enzyme, alpha domain [IPR023318] (1)                                                                                                          | C_unshiu_00051_mRNA_31.2         | -                           | -                               |
| GF0024852 | 1                             | 1                        | 0                            | Basic 7S globulin (2)                                                                                             | proteolysis [GO:0006508 biological_process] (2); aspartic-type endopeptidase activity [GO:0004190 molecular_function] (2)                                                                                                                                                                                                                           | Peptidase family A1 domain [IPR033121] (2); Aspartic peptidase domain [IPR021109] (2); Xylanase inhibitor, N-terminal [IPR033861] (2); Xylanase inhibitor, C-terminal [IPR032799] (2); Aspartic peptidase A1 family [IPR001461] (2); Xylanase inhibitor 1-like [IPR033868] (1)                                                                                                                                                             | scaffold_9_mRNA_493.1            | C_unshiu_00051_mRNA_26.1    | -                               |
| GF0024850 | 1                             | 1                        | 0                            | Hypothetical protein (2)                                                                                          |                                                                                                                                                                                                                                                                                                                                                     | Aspartic peptidase domain [IPR021109] (2); Peptidase family A1 domain [IPR033121] (2); Aspartic peptidase A1 family [IPR001461] (2); Xylanase inhibitor, C-terminal [IPR032799] (2); Xylanase inhibitor, N-terminal [IPR033861] (2); Xylanase inhibitor 1-like [IPR033868] (1)                                                                                                                                                             | scaffold_9_mRNA_488.1            | C_unshiu_00051_mRNA_23.1    | -                               |
| GF0024849 | 1                             | 1                        | 0                            | Basic 7S globulin (2)                                                                                             | proteolysis [GO:0006508 biological_process] (2); aspartic-type endopeptidase activity [GO:0004190 molecular_function] (2)                                                                                                                                                                                                                           | Ferritin-like superfamily [IPR009078] (2); Ribonucleotide reductase small subunit, active site [IPR030475] (2); Ribonucleotide reductase small subunit [IPR033909] (1); Ribonucleotide reductase-related [IPR012348] (1); Ribonucleotide reductase small subunit [IPR003358] (1); Ribonucleotide reductase small subunit family [IPR000358] (1)                                                                                            | scaffold_9_mRNA_485.1            | C_unshiu_00702_mRNA_6.1     | -                               |
| GF0024848 | 1                             | 1                        | 0                            | Hypothetical protein (2)                                                                                          | metal ion transport [GO:0030001 biological_process] (2); metal ion binding [GO:0046872 molecular_function] (2)                                                                                                                                                                                                                                      | Heavy metal-associated domain, HMA [IPR006121] (2)                                                                                                                                                                                                                                                                                                                                                                                         | scaffold_9_mRNA_476.1            | C_unshiu_00097_mRNA_16.1    | -                               |
| GF0024846 | 1                             | 1                        | 0                            | Ribonucleoside-diphosphate reductase small chain (2)                                                              | oxidation-reduction process [GO:005514 biological_process] (2); deoxyribonucleoside diphosphate metabolic process [GO:0009186 biological_process] (1); deoxyribonucleoside biosynthetic process [GO:0009263 biological_process] (1); oxidoreductase activity [GO:0016491 molecular_function] (1)                                                    | Ferritin-like superfamily [IPR009078] (2); Ribonucleotide reductase small subunit, active site [IPR030475] (2); Ribonucleotide reductase small subunit [IPR033909] (1); Ribonucleotide reductase-related [IPR012348] (1); Ribonucleotide reductase small subunit [IPR003358] (1); Ribonucleotide reductase small subunit family [IPR000358] (1)                                                                                            | scaffold_9_mRNA_460.1            | C_unshiu_00097_mRNA_30.1    | -                               |
| GF0024844 | 1                             | 1                        | 0                            | Dienelactone hydrolase family, putative (2)                                                                       | hydrolase activity [GO:0016787 molecular_function] (1)                                                                                                                                                                                                                                                                                              | Alpha Beta hydrolase fold [IPR029058] (2); Dienelactone hydrolase [IPR002925] (1)                                                                                                                                                                                                                                                                                                                                                          | scaffold_9_mRNA_454.1            | C_unshiu_00097_mRNA_37.1    | -                               |
| GF0024843 | 1                             | 1                        | 0                            | Hypothetical protein (2)                                                                                          |                                                                                                                                                                                                                                                                                                                                                     | EF-hand 1, calcium-binding site [IPR018247] (2); EF-hand domain pair [IPR011992] (2)                                                                                                                                                                                                                                                                                                                                                       | scaffold_9_mRNA_453.1            | C_unshiu_00097_mRNA_38.1    | -                               |
| GF0024842 | 1                             | 1                        | 0                            | EF-hand, calcium binding motif-containing protein (2)                                                             | calcium ion binding [GO:0005509 molecular_function] (2)                                                                                                                                                                                                                                                                                             | EF-hand domain [IPR020488] (2); EF-hand 1, calcium-binding site [IPR018247] (2); EF-hand domain pair [IPR011992] (2)                                                                                                                                                                                                                                                                                                                       | scaffold_9_mRNA_450.1            | C_unshiu_01541_mRNA_2.1     | -                               |
| GF0024840 | 1                             | 1                        | 0                            | Hypothetical protein (2)                                                                                          |                                                                                                                                                                                                                                                                                                                                                     | Bax inhibitor 1-related [IPR006214] (1)                                                                                                                                                                                                                                                                                                                                                                                                    | scaffold_9_mRNA_434.1            | C_unshiu_00040_mRNA_71.1    | -                               |
| GF0024839 | 1                             | 1                        | 0                            | Hypothetical protein (2)                                                                                          |                                                                                                                                                                                                                                                                                                                                                     | Chaperonin TCP-1, conserved site [IPR02194] (2)                                                                                                                                                                                                                                                                                                                                                                                            | scaffold_9_mRNA_422.1            | C_unshiu_00040_mRNA_57.1    | -                               |
| GF0024838 | 1                             | 1                        | 0                            | Glytamate binding protein (1); Hypothetical protein (1)                                                           |                                                                                                                                                                                                                                                                                                                                                     | Chaperonin TCP-1, conserved site [IPR02194] (2)                                                                                                                                                                                                                                                                                                                                                                                            | scaffold_9_mRNA_410.1            | C_unshiu_00366_mRNA_24.1    | -                               |
| GF0024837 | 1                             | 1                        | 0                            | Hypothetical protein (2)                                                                                          |                                                                                                                                                                                                                                                                                                                                                     | Nucleotide-diphosphate-sugar transferase [IPR020044] (2); Domain of unknown function DUF4283 [IPR025558] (2)                                                                                                                                                                                                                                                                                                                               | scaffold_9_mRNA_408.1            | C_unshiu_00366_mRNA_26.1    | -                               |
| GF0024836 | 1                             | 1                        | 0                            | Hypothetical protein (2)                                                                                          |                                                                                                                                                                                                                                                                                                                                                     | Chaperonin TCP-1, conserved site [IPR02194] (2)                                                                                                                                                                                                                                                                                                                                                                                            | scaffold_9_mRNA_401.1            | C_unshiu_00366_mRNA_32.1    | -                               |
| GF0024835 | 1                             | 1                        | 0                            | Pentatricopeptide repeat-containing protein, chloroplastic (2)                                                    | protein binding [GO:0005515 molecular_function] (1)                                                                                                                                                                                                                                                                                                 | Chaperonin TCP-1 family [IPR024231] (2); GroEL-like equatorial domain [IPR027413] (2); C-complex protein 1, gamma subunit [IPR012719] (2); Chaperone tailless complex polypeptide 1 (TCP-1) [IPR017998] (2); Chaperonin TCP-1, conserved site [IPR02194] (2)                                                                                                                                                                               | scaffold_9_mRNA_40.1             | C_unshiu_00007_mRNA_143.1   | -                               |
| GF0024831 | 1                             | 1                        | 0                            | Histidine-containing phosphotransfer protein 4 (2)                                                                | signal transducer activity [GO:0004871 molecular_function] (2); phosphoryl signal transduction system [GO:0006166 biological_process] (2)                                                                                                                                                                                                           | Signal transduction histidine kinase, phosphotransfer (Hpt) domain [IPR008207] (2)                                                                                                                                                                                                                                                                                                                                                         | scaffold_9_mRNA_386.1            | C_unshiu_00394_mRNA_22.1    | -                               |
| GF0024830 | 1                             | 1                        | 0                            | Hypothetical protein (2)                                                                                          | ATP binding [GO:0005254 molecular_function] (2); unfolded protein binding [GO:0051082 molecular_function] (2); protein folding [GO:0006457 biological_process] (2)                                                                                                                                                                                  | Chaperonin Cpn60/TCP-1 family [IPR024231] (2); GroEL-like equatorial domain [IPR027413] (2); C-complex protein 1, gamma subunit [IPR012719] (2); Chaperone tailless complex polypeptide 1 (TCP-1) [IPR017998] (2); Chaperonin TCP-1, conserved site [IPR02194] (2)                                                                                                                                                                         | scaffold_9_mRNA_384.0            | C_unshiu_00003_mRNA_118.1   | -                               |
| GF0024829 | 1                             | 1                        | 0                            | Hypothetical protein (2)                                                                                          |                                                                                                                                                                                                                                                                                                                                                     | Major facilitator superfamily domain [IPR020846] (2)                                                                                                                                                                                                                                                                                                                                                                                       | scaffold_9_mRNA_383.1            | C_unshiu_00003_mRNA_115.1   | -                               |
| GF0024828 | 1                             | 1                        | 0                            | Hypothetical protein (2)                                                                                          |                                                                                                                                                                                                                                                                                                                                                     | Major facilitator superfamily domain [IPR020846] (2)                                                                                                                                                                                                                                                                                                                                                                                       | scaffold_9_mRNA_383.3            | C_unshiu_00003_mRNA_111.1   | -                               |
| GF0024826 | 1                             | 1                        | 0                            | Hypothetical protein (2)                                                                                          |                                                                                                                                                                                                                                                                                                                                                     | Major facilitator superfamily domain [IPR020846] (2)                                                                                                                                                                                                                                                                                                                                                                                       | scaffold_9_mRNA_380.8            | C_unshiu_00003_mRNA_89.1    | -                               |
| GF0024825 | 1                             | 1                        | 0                            | Nuclear transcription factor Y subunit C-9 (1); Nuclear transcription factor Y subunit C-9 (1)                    | protein heterodimerization activity [GO:0046982 molecular_function] (2)                                                                                                                                                                                                                                                                             | Transcription factor CBF/NEF/archaeal histone domain [IPR003958] (2); Helix-turn-helix motif [IPR009072] (2)                                                                                                                                                                                                                                                                                                                               | scaffold_9_mRNA_379.6            | C_unshiu_00003_mRNA_76.1    | -                               |
| GF0024822 | 1                             | 1                        | 0                            | Spllicing factor, arginine/serine-rich 12 (2)                                                                     |                                                                                                                                                                                                                                                                                                                                                     | 14-3-3 domain [IPR023410] (2); 14-3-3 protein [IPR000308] (2)                                                                                                                                                                                                                                                                                                                                                                              | scaffold_9_mRNA_376.6            | C_unshiu_00003_mRNA_49.1    | -                               |
| GF0024821 | 1                             | 1                        | 0                            | Hypothetical protein (2)                                                                                          |                                                                                                                                                                                                                                                                                                                                                     | 14-3-3 domain [IPR023410] (2); 14-3-3 protein [IPR000308] (2)                                                                                                                                                                                                                                                                                                                                                                              | scaffold_9_mRNA_376.4            | C_unshiu_00303_mRNA_34.1    | -                               |
| GF0024818 | 1                             | 1                        | 0                            | FUS1/COCCIN receptor protein s (2)                                                                                | protein domain specific binding [GO:0019904 molecular_function] (2)                                                                                                                                                                                                                                                                                 | Fungal organ boundaries, LOB [IPR004883] (2)                                                                                                                                                                                                                                                                                                                                                                                               | scaffold_9_mRNA_374.3            | C_unshiu_00003_mRNA_26.1    | -                               |
| GF0024816 | 1                             | 1                        | 0                            | LOB domain-containing protein 4 (2)                                                                               |                                                                                                                                                                                                                                                                                                                                                     | Fungal organ boundaries, LOB [IPR004883] (2)                                                                                                                                                                                                                                                                                                                                                                                               | scaffold_9_mRNA_373.6            | C_unshiu_00003_mRNA_32.1    | -                               |
| GF0024815 | 1                             | 1                        | 0                            | Hypothetical protein (2)                                                                                          |                                                                                                                                                                                                                                                                                                                                                     | Ribonuclease H-like domain [IPR012337] (2); Cyclic nucleotide-binding-like [IPR018490] (2); RmC-like jelly roll fold [IPR014710] (2); Cyclic nucleotide-binding domain [IPR000595] (2); HAT, C-terminal dimerisation domain [IPR008096] (2); RmC-like jelly roll fold [IPR014710] (2); Cyclic nucleotide-binding-like [IPR018490] (2); Cyclic nucleotide-binding domain [IPR000595] (2); Gag-polypeptide of LTR copia-type [IPR029472] (1) | scaffold_9_mRNA_373.4            | C_unshiu_00003_mRNA_23.1    | -                               |
| GF0024813 | 1                             | 1                        | 0                            | Cyclic nucleotide-gated ion channel 1 (2)                                                                         | nucleic acid binding [GO:0003676 molecular_function] (2); protein dimerization activity [GO:0046983 molecular_function] (2)                                                                                                                                                                                                                         | 14-3-3 domain [IPR023410] (2); 14-3-3 protein [IPR000308] (2)                                                                                                                                                                                                                                                                                                                                                                              | scaffold_9_mRNA_371.4            | C_unshiu_00003_mRNA_3.1     | -                               |
| GF0024812 | 1                             | 1                        | 0                            | Hypothetical protein (2)                                                                                          |                                                                                                                                                                                                                                                                                                                                                     | Ribonuclease H-like domain [IPR012337] (2); Cyclic nucleotide-binding-like [IPR018490] (2); RmC-like jelly roll fold [IPR014710] (2); Cyclic nucleotide-binding domain [IPR000595] (2); HAT, C-terminal dimerisation domain [IPR008096] (2); RmC-like jelly roll fold [IPR014710] (2); Cyclic nucleotide-binding-like [IPR018490] (2); Cyclic nucleotide-binding domain [IPR000595] (2); Gag-polypeptide of LTR copia-type [IPR029472] (1) | scaffold_9_mRNA_371.1            | C_unshiu_01726_mRNA_1.1     | -                               |
| GF0024811 | 1                             | 1                        | 0                            | Cyclic nucleotide gated channel 5 isoform 1 (1); Hypothetical protein (1)                                         |                                                                                                                                                                                                                                                                                                                                                     | Cyclic nucleotide-binding domain [IPR000595] (2); RmC-like jelly roll fold [IPR014710] (2); Cyclic nucleotide-binding-like [IPR018490] (2)                                                                                                                                                                                                                                                                                                 | scaffold_9_mRNA_371.0            | C_unshiu_01726_mRNA_2.1     | -                               |
| GF0024809 | 1                             | 1                        | 0                            | Non-LTR retroelement reverse transcriptase-like protein (2)                                                       | nucleic acid binding [GO:0003676 molecular_function] (2); RNA-DNA hybrid ribonuclease activity [GO:0004523 molecular_function] (2)                                                                                                                                                                                                                  | Ribonuclease H domain [IPR002156] (2); Ribonuclease H-like domain [IPR012337] (2)                                                                                                                                                                                                                                                                                                                                                          | scaffold_9_mRNA_370.5            | C_unshiu_00740_mRNA_1.1     | -                               |
| GF0024808 | 1                             | 1                        | 0                            | Cyclic nucleotide-gated ion channel-like protein (2)                                                              | telohalose biosynthetic process [GO:0005992 biological_process] (2); ion channel activity [GO:0005216 molecular_function] (2); catalytic activity [GO:0003824 molecular_function] (2); membrane [GO:0016020 cellular_component] (2); ion transport [GO:0006811 biological_process] (2); transmembrane transport [GO:0055085 biological_process] (2) | HAD-superfamily hydrolase, subfamily IIB [IPR006379] (2); Trehalose-phosphatase [IPR003377] (2); Cyclic nucleotide-binding domain [IPR000595] (2); Cyclic nucleotide-binding-like [IPR018490] (2); Ion transport domain [IPR005821] (2); HAD-like domain [IPR023214] (2); RmC-like jelly roll fold [IPR014710] (2)                                                                                                                         | scaffold_9_mRNA_369.6            | C_unshiu_00134_mRNA_2.1     | -                               |
| GF0024807 | 1                             | 1                        | 0                            | Pentatricopeptide repeat-containing family protein (1); PPR containing plant-like protein (1)                     | protein binding [GO:0005515 molecular_function] (2)                                                                                                                                                                                                                                                                                                 | Pentatricopeptide repeat [IPR022885] (2); Tetra- or pentapeptide-like helical domain [IPR011990] (2)                                                                                                                                                                                                                                                                                                                                       | scaffold_9_mRNA_367.6            | C_unshiu_00134_mRNA_19.1    | -                               |
| GF0024806 | 1                             | 1                        | 0                            | tRNA dimethylallyltransferase (2)                                                                                 |                                                                                                                                                                                                                                                                                                                                                     | Protein of unknown function DUF3143 [IPR024593] (2); Leucine-rich repeat [IPR001611] (2)                                                                                                                                                                                                                                                                                                                                                   | scaffold_9_mRNA_365.0            | C_unshiu_00134_mRNA_44.1    | -                               |
| GF0024805 | 1                             | 1                        | 0                            | Disease resistance family protein / LRR family protein, putative (1); LRR receptor-like kinase family protein (1) | protein binding [GO:0005515 molecular_function] (2)                                                                                                                                                                                                                                                                                                 | Leucine-rich repeat domain, L domain-like [IPR032675] (2); Leucine-rich repeat-containing N-terminal, plant-type [IPR013210] (1); Leucine-rich repeat, typical subtype [IPR003591] (1)                                                                                                                                                                                                                                                     | scaffold_9_mRNA_364.5            | C_unshiu_00134_mRNA_51.1    | -                               |
| GF0024802 | 1                             | 1                        | 0                            | Hypothetical protein (2)                                                                                          |                                                                                                                                                                                                                                                                                                                                                     | Leucine-rich repeat domain, L domain-like [IPR032675] (2); Leucine-rich repeat [IPR001611] (2); Ribonuclease H-like domain [IPR012337] (1)                                                                                                                                                                                                                                                                                                 | scaffold_9_mRNA_362.2            | C_unshiu_00056_mRNA_50.1    | -                               |
| GF0024801 | 1                             | 1                        | 0                            | Disease resistance family protein / LRR family protein, putative (2)                                              | protein binding [GO:0005515 molecular_function] (2); nucleic acid binding [GO:0003676 molecular_function] (1)                                                                                                                                                                                                                                       | Leucine-rich repeat domain, L domain-like [IPR032675] (2); Leucine-rich repeat [IPR001611] (2); Ribonuclease H-like domain [IPR012337] (1)                                                                                                                                                                                                                                                                                                 | scaffold_9_mRNA_362.0            | C_unshiu_00056_mRNA_48.1    | -                               |
| GF0024800 | 1                             | 1                        | 0                            | Salsarinaldol 7-O-acetyltransferase (1); Salsarinaldol 7-O-acetyltransferase, putative (1)                        | transferrase activity, transferring acyl groups other than amino-acyl groups [GO:0016747 molecular_function] (2)                                                                                                                                                                                                                                    | Transferrase [IPR034800] (2); Chloramphenicol acetyltransferase-like domain [IPR023213] (1)                                                                                                                                                                                                                                                                                                                                                | scaffold_9_mRNA_361.5            | C_unshiu_00056_mRNA_45.1    | -                               |
| GF0024799 | 1                             | 1                        | 0                            | Beta-carotene hydroxylase 1 (2)                                                                                   | iron ion binding [GO:0005506 molecular_function] (2); oxidoreductase activity [GO:0016491 molecular_function] (2); oxidation-reduction process [GO:0055114 biological_process] (2); fatty acid biosynthetic process [GO:0006633 biological_process] (1); lipid biosynthetic process [GO:0008610 biological_process] (1)                             | Fatty acid hydroxylase [IPR006694] (2)                                                                                                                                                                                                                                                                                                                                                                                                     | scaffold_9_mRNA_359.3            | C_unshiu_00056_mRNA_20.1    | -                               |
| GF0024798 | 1                             | 1                        | 0                            | Putative membrane yjcL (2)                                                                                        |                                                                                                                                                                                                                                                                                                                                                     | Protein of unknown function DUF819 [IPR008537] (2)                                                                                                                                                                                                                                                                                                                                                                                         | scaffold_9_mRNA_358.6            | C_unshiu_00056_mRNA_13.1    | -                               |
| GF0024797 | 1                             | 1                        | 0                            | Putative membrane yjcL (2)                                                                                        |                                                                                                                                                                                                                                                                                                                                                     | Protein of unknown function DUF819 [IPR008537] (2)                                                                                                                                                                                                                                                                                                                                                                                         | scaffold_9_mRNA_358.5            | C_unshiu_00056_mRNA_12.1    | -                               |
| GF0024795 | 1                             | 1                        | 0                            | Hypothetical protein (1); Retinol dehydrogenase 14 (1)                                                            |                                                                                                                                                                                                                                                                                                                                                     | NAD(P)-binding domain [IPR016040] (2)                                                                                                                                                                                                                                                                                                                                                                                                      | scaffold_9_mRNA_356.8            | C_unshiu_01328_mRNA_5.1     | -                               |

| ID        | Num. in <i>C. clementiae</i> | Num. in <i>C. uschii</i> | Num. in <i>P. trifoliate</i> | Note                                                                                                             | GO                                                                                                                                                                                                                                                                                                                                                                                                         | InterPro                                                                                                                                                                                                                                                                                                                                                                                                                                                                                                                                                  | Members in <i>C. clementiae</i> | Members in <i>C. uschii</i> | Members in <i>P. trifoliate</i> |
|-----------|------------------------------|--------------------------|------------------------------|------------------------------------------------------------------------------------------------------------------|------------------------------------------------------------------------------------------------------------------------------------------------------------------------------------------------------------------------------------------------------------------------------------------------------------------------------------------------------------------------------------------------------------|-----------------------------------------------------------------------------------------------------------------------------------------------------------------------------------------------------------------------------------------------------------------------------------------------------------------------------------------------------------------------------------------------------------------------------------------------------------------------------------------------------------------------------------------------------------|---------------------------------|-----------------------------|---------------------------------|
| GF0024793 | 1                            | 1                        | 0                            | Short-chain dehydrogenase TIC 32, chloroplastic (2)                                                              | oxidoreductase activity [GO:0016491 molecular_function] (1); metabolic process [GO:0008052 biological_process] (1)                                                                                                                                                                                                                                                                                         | NAD(P)-binding domain [IPR016040] (2); Short-chain dehydrogenase/reductase SDR [IPR002347] (1); Short-chain dehydrogenase/reductase SDR [IPR002198] (1)                                                                                                                                                                                                                                                                                                                                                                                                   | scaffold_9_mRNA_3554.1          | C.uschii_01221_mRNA_6.1     | -                               |
| GF0024790 | 1                            | 1                        | 0                            | Putative Prolyl 4-hydroxylase alpha subunit (2)                                                                  | L-ascorbic acid binding [GO:0031418 molecular_function] (2); oxidation-reduction process [GO:0055114 biological_process] (2); oxidoreductase activity, acting on paired donors, with incorporation or reduction of molecular oxygen [GO:0016705 molecular_function] (2); iron ion binding [GO:0005506 molecular_function] (2); oxidoreductase activity [GO:0016491 molecular_function] (1)                 | ShkT domain [IPR003582] (2); Prolyl 4-hydroxylase, alpha subunit [IPR006620] (2); Oxoglutarate/iron-dependent dioxygenase [IPR005123] (1)                                                                                                                                                                                                                                                                                                                                                                                                                 | scaffold_9_mRNA_3541.1          | C.uschii_01810_mRNA_6.1     | -                               |
| GF0024789 | 1                            | 1                        | 0                            | Hypothetical protein (2)                                                                                         |                                                                                                                                                                                                                                                                                                                                                                                                            |                                                                                                                                                                                                                                                                                                                                                                                                                                                                                                                                                           | scaffold_9_mRNA_3530.1          | C.uschii_00045_mRNA_91.1    | -                               |
| GF0024788 | 1                            | 1                        | 0                            | KDEL motif-containing protein 1 (2)                                                                              |                                                                                                                                                                                                                                                                                                                                                                                                            | Lipopolysaccharide-modifying protein [IPR006598] (2)                                                                                                                                                                                                                                                                                                                                                                                                                                                                                                      | scaffold_9_mRNA_3515.1          | C.uschii_00045_mRNA_74.1    | -                               |
| GF0024785 | 1                            | 1                        | 0                            | Hypothetical protein (2)                                                                                         | nucleic acid binding [GO:0003676 molecular_function] (2)                                                                                                                                                                                                                                                                                                                                                   | Ribonuclease H-like domain [IPR012337] (2)                                                                                                                                                                                                                                                                                                                                                                                                                                                                                                                | scaffold_9_mRNA_3499.1          | C.uschii_00045_mRNA_61.1    | -                               |
| GF0024784 | 1                            | 1                        | 0                            | Serine/threonine-protein kinase PBS1 (1); G-type lectin S-receptor-like serine/threonine-protein kinase RKS1 (1) | ATP binding [GO:0005524 molecular_function] (2); protein phosphorylation [GO:0006468 biological_process] (2); protein kinase activity [GO:0004672 molecular_function] (2)                                                                                                                                                                                                                                  | Protein kinase-like domain [IPR011009] (2); Protein kinase domain [IPR000719] (2); Protein kinase, ATP binding site [IPR017441] (2); Leucine-rich repeat domain, L domain-like [IPR026751] (1); Serine-threonine/tyrosine-protein kinase catalytic domain [IPR012451] (1); Serine-threonine/tyrosine-protein kinase, catalytic domain [IPR012451] (1)                                                                                                                                                                                                     | scaffold_9_mRNA_3481.1          | C.uschii_00045_mRNA_47.1    | -                               |
| GF0024781 | 1                            | 1                        | 0                            | Hypothetical protein (2)                                                                                         | oxidation-reduction process [GO:0055114 biological_process] (2); oxidoreductase activity [GO:0016491 molecular_function] (1); zinc ion binding [GO:0008270 molecular_function] (1)                                                                                                                                                                                                                         | NAD(P)-binding domain [IPR016040] (2); GroES-like [IPR011032] (2); Alcohol dehydrogenase, C-terminal [IPR013149] (2); Alcohol dehydrogenase, N-terminal [IPR013154] (2); Intron C-terminal splicing region [IPR030934] (1); Alcohol dehydrogenase superfamily, zinc-type [IPR000385] (1)                                                                                                                                                                                                                                                                  | scaffold_9_mRNA_3449.1          | C.uschii_00045_mRNA_16.1    | -                               |
| GF0024780 | 1                            | 1                        | 0                            | Hypothetical protein (2)                                                                                         | transferase activity, transferring hexosyl groups [GO:0016758 molecular_function] (2); metabolic process [GO:0008052 biological_process] (2)                                                                                                                                                                                                                                                               | UDP-glucuronosyl/UDP-glucosyltransferase [IPR002213] (2)                                                                                                                                                                                                                                                                                                                                                                                                                                                                                                  | scaffold_9_mRNA_3445.1          | C.uschii_00045_mRNA_12.1    | -                               |
| GF0024779 | 1                            | 1                        | 0                            | Hydroxymethylglutaryl-CoA synthase (2)                                                                           | catalytic activity [GO:0003824 molecular_function] (2); isoprenoid biosynthetic process [GO:0008299 biological_process] (2); metabolic process [GO:0008052 biological_process] (2); hydroxymethylglutaryl-CoA synthase activity [GO:0004421 molecular_function] (2)                                                                                                                                        | Thiolase-like [IPR016039] (2); Hydroxymethylglutaryl-coenzyme A synthase, N-terminal [IPR013538] (2); Hydroxymethylglutaryl-CoA synthase, eukaryotic [IPR010122] (2); Hydroxymethylglutaryl-coenzyme A synthase, active site [IPR009101] (2); Hydroxymethylglutaryl-coenzyme A synthase C-terminal domain [IPR013746] (2)                                                                                                                                                                                                                                 | scaffold_9_mRNA_3441.1          | C.uschii_00045_mRNA_8.1     | -                               |
| GF0024778 | 1                            | 1                        | 0                            | TCP family transcription factor (2)                                                                              |                                                                                                                                                                                                                                                                                                                                                                                                            | Transcription factor, TCP [IPR005333] (2); Transcription factor TCP subgroup [IPR017887] (2)                                                                                                                                                                                                                                                                                                                                                                                                                                                              | scaffold_9_mRNA_3440.1          | C.uschii_00045_mRNA_7.1     | -                               |
| GF0024777 | 1                            | 1                        | 0                            | Hypothetical protein (2)                                                                                         |                                                                                                                                                                                                                                                                                                                                                                                                            |                                                                                                                                                                                                                                                                                                                                                                                                                                                                                                                                                           | scaffold_9_mRNA_3432.1          | C.uschii_01380_mRNA_5.1     | -                               |
| GF0024776 | 1                            | 1                        | 0                            | Gibberellin receptor GID1, putative (2)                                                                          | hydrolase activity [GO:0016787 molecular_function] (2); metabolic process [GO:0008052 biological_process] (2)                                                                                                                                                                                                                                                                                              | Lipase, GDGX, putative histidine active site [IPR021688] (2); Alpha/Beta hydrolase fold [IPR029058] (2); Alpha/beta hydrolase fold-3 [IPR013094] (2)                                                                                                                                                                                                                                                                                                                                                                                                      | scaffold_9_mRNA_3421.1          | C.uschii_01050_mRNA_2.1     | -                               |
| GF0024775 | 1                            | 1                        | 0                            | Hypothetical protein (2)                                                                                         | oxidoreductase activity, acting on paired donors, with incorporation or reduction of molecular oxygen [GO:0016705 molecular_function] (2); oxidation-reduction process [GO:0055114 biological_process] (2); iron ion binding [GO:0005506 molecular_function] (2); heme binding [GO:0020037 molecular_function] (2)                                                                                         | Cytochrome P450, E-class, group I [IPR002401] (2); Cytochrome P450 [IPR001128] (2)                                                                                                                                                                                                                                                                                                                                                                                                                                                                        | scaffold_9_mRNA_3394.1          | C.uschii_00182_mRNA_44.1    | -                               |
| GF0024770 | 1                            | 1                        | 0                            | LRR receptor-like serine/threonine-protein kinase ERL1 (2)                                                       | ATP binding [GO:0005524 molecular_function] (2); protein kinase activity [GO:0004672 molecular_function] (2); protein phosphorylation [GO:0006468 biological_process] (2); protein binding [GO:0005515 molecular_function] (2)                                                                                                                                                                             | Protein kinase domain [IPR000719] (2); Leucine-rich repeat domain, L domain-like [IPR026751] (2); Protein kinase-like domain [IPR011009] (2); Leucine-rich repeat, typical subtype [IPR003591] (2); Serine/threonine-protein kinase, active site [IPR008271] (2); Protein kinase, ATP binding site [IPR017441] (2); Leucine-rich repeat-containing N-terminal, plant-type [IPR013210] (2); Leucine-rich repeat [IPR016111] (2); Leucine rich repeat 4 [IPR025875] (1); Serine/threonine/dual specificity protein kinase, catalytic domain [IPR022900] (1) | scaffold_9_mRNA_3385.1          | C.uschii_00182_mRNA_35.1    | -                               |
| GF0024767 | 1                            | 1                        | 0                            | Hypothetical protein (2)                                                                                         |                                                                                                                                                                                                                                                                                                                                                                                                            | Protein kinase-like domain [IPR011009] (2)                                                                                                                                                                                                                                                                                                                                                                                                                                                                                                                | scaffold_9_mRNA_333.1           | C.uschii_00085_mRNA_25.1    | -                               |
| GF0024764 | 1                            | 1                        | 0                            | Hypothetical protein (2)                                                                                         |                                                                                                                                                                                                                                                                                                                                                                                                            |                                                                                                                                                                                                                                                                                                                                                                                                                                                                                                                                                           | scaffold_9_mRNA_3319.1          | C.uschii_00252_mRNA_22.1    | -                               |
| GF0024763 | 1                            | 1                        | 0                            | Probable pectinesterase/pectinesterase inhibitor 60 (2)                                                          | pectinesterase activity [GO:0030599 molecular_function] (2); enzyme inhibitor activity [GO:0004857 molecular_function] (2); cell wall [GO:0005618 cellular_component] (2); cell wall modification [GO:0042545 biological_process] (2)                                                                                                                                                                      | Pectinesterase, Asp active site [IPR033131] (2); Pectin lyase fold [IPR012344] (2); Pectinesterase inhibitor domain [IPR006011] (2); Pectinesterase, catalytic [IPR000070] (2); Pectin lyase fold/vulnence factor [IPR011050] (2); Pectinesterase, Tyr active site [IPR018040] (2)                                                                                                                                                                                                                                                                        | scaffold_9_mRNA_3312.1          | C.uschii_00252_mRNA_29.1    | -                               |
| GF0024761 | 1                            | 1                        | 0                            | Wall-associated receptor kinase 2 (2)                                                                            | protein kinase activity [GO:0004672 molecular_function] (2); protein phosphorylation [GO:0006468 biological_process] (2); polysaccharide binding [GO:0003047 molecular_function] (2); ATP binding [GO:0005524 molecular_function] (2)                                                                                                                                                                      | Serine/threonine-protein kinase, active site [IPR008271] (2); Wall-associated receptor kinase, galacturonan-binding domain [IPR025287] (2); Protein kinase-like domain [IPR011009] (2); Protein kinase domain [IPR000719] (2); Serine/threonine/dual specificity protein kinase, catalytic domain [IPR022900] (1); Concanavalin A-like lectin/glucanase domain [IPR013320] (1)                                                                                                                                                                            | scaffold_9_mRNA_3304.1          | C.uschii_00252_mRNA_36.1    | -                               |
| GF0024760 | 1                            | 1                        | 0                            | Hypothetical protein (2)                                                                                         |                                                                                                                                                                                                                                                                                                                                                                                                            |                                                                                                                                                                                                                                                                                                                                                                                                                                                                                                                                                           | scaffold_9_mRNA_3302.1          | C.uschii_02743_mRNA_1.1     | -                               |
| GF0024759 | 1                            | 1                        | 0                            | Hypothetical protein (2)                                                                                         |                                                                                                                                                                                                                                                                                                                                                                                                            |                                                                                                                                                                                                                                                                                                                                                                                                                                                                                                                                                           | scaffold_9_mRNA_3286.1          | C.uschii_00741_mRNA_1.1     | -                               |
| GF0024758 | 1                            | 1                        | 0                            | RIN1 finger and CHY zinc finger domain-containing protein 1 isoform 1 (2)                                        |                                                                                                                                                                                                                                                                                                                                                                                                            |                                                                                                                                                                                                                                                                                                                                                                                                                                                                                                                                                           | scaffold_9_mRNA_328.1           | C.uschii_00085_mRNA_29.1    | -                               |
| GF0024757 | 1                            | 1                        | 0                            | Acidic endochitinase (2)                                                                                         | carbohydrate metabolic process [GO:005975 biological_process] (2); hydrolase activity, hydrolyzing O-glycosyl compounds [GO:0044553 molecular_function] (2)                                                                                                                                                                                                                                                | Glycoside hydrolase family 18, catalytic domain [IPR011223] (2); Glycoside hydrolase, chitinase active site [IPR01579] (2); Glycoside hydrolase superfamily domain [IPR020463] (2); Glycoside hydrolase, catalytic domain [IPR013781] (1)                                                                                                                                                                                                                                                                                                                 | scaffold_9_mRNA_3267.1          | C.uschii_00453_mRNA_15.1    | -                               |
| GF0024756 | 1                            | 1                        | 0                            | Hypothetical protein (2)                                                                                         |                                                                                                                                                                                                                                                                                                                                                                                                            |                                                                                                                                                                                                                                                                                                                                                                                                                                                                                                                                                           | scaffold_9_mRNA_326.1           | C.uschii_00085_mRNA_31.1    | -                               |
| GF0024755 | 1                            | 1                        | 0                            | Hypothetical protein (2)                                                                                         |                                                                                                                                                                                                                                                                                                                                                                                                            |                                                                                                                                                                                                                                                                                                                                                                                                                                                                                                                                                           | scaffold_9_mRNA_3256.1          | C.uschii_00413_mRNA_3.1     | -                               |
| GF0024754 | 1                            | 1                        | 0                            | Hypothetical protein (2)                                                                                         |                                                                                                                                                                                                                                                                                                                                                                                                            |                                                                                                                                                                                                                                                                                                                                                                                                                                                                                                                                                           | scaffold_9_mRNA_3254.1          | C.uschii_00161_mRNA_41.1    | -                               |
| GF0024753 | 1                            | 1                        | 0                            | Hypothetical protein (2)                                                                                         |                                                                                                                                                                                                                                                                                                                                                                                                            |                                                                                                                                                                                                                                                                                                                                                                                                                                                                                                                                                           | scaffold_9_mRNA_3238.1          | C.uschii_00095_mRNA_28.1    | -                               |
| GF0024752 | 1                            | 1                        | 0                            | Hypothetical protein (2)                                                                                         |                                                                                                                                                                                                                                                                                                                                                                                                            |                                                                                                                                                                                                                                                                                                                                                                                                                                                                                                                                                           | scaffold_9_mRNA_3236.1          | C.uschii_00095_mRNA_31.1    | -                               |
| GF0024748 | 1                            | 1                        | 0                            | Hypothetical protein (2)                                                                                         |                                                                                                                                                                                                                                                                                                                                                                                                            |                                                                                                                                                                                                                                                                                                                                                                                                                                                                                                                                                           | scaffold_9_mRNA_3216.1          | C.uschii_00095_mRNA_44.1    | -                               |
| GF0024747 | 1                            | 1                        | 0                            | Reverse transcriptase (2)                                                                                        | RNA-directed DNA polymerase [GO:0005508 biological_process] (2)                                                                                                                                                                                                                                                                                                                                            | Reverse transcriptase domain [IPR000477] (2)                                                                                                                                                                                                                                                                                                                                                                                                                                                                                                              | scaffold_9_mRNA_3205.1          | C.uschii_00599_mRNA_20.1    | -                               |
| GF0024746 | 1                            | 1                        | 0                            | Hexose carrier protein HEX6 (2)                                                                                  | integral component of membrane [GO:0016021 cellular_component] (2); substrate-specific transmembrane transporter activity [GO:0022891 molecular_function] (2); transmembrane transporter activity [GO:0022857 molecular_function] (2); membrane [GO:0016020 cellular_component] (2); transporter activity [GO:0005215 molecular_function] (2); transmembrane transport [GO:0055085 biological_process] (2) | Sugar transporter, conserved site [IPR05829] (2); Major facilitator superfamily domain [IPR020463] (2); Major facilitator, sugar transporter-like [IPR005828] (2); Sugar/inositol transporter [IPR003663] (2)                                                                                                                                                                                                                                                                                                                                             | scaffold_9_mRNA_3203.1          | C.uschii_00599_mRNA_18.1    | -                               |
| GF0024743 | 1                            | 1                        | 0                            | DERLIN-1 isoform 1 (2)                                                                                           | serine-type endopeptidase activity [GO:004252 molecular_function] (1); integral component of membrane [GO:0016021 cellular_component] (1)                                                                                                                                                                                                                                                                  | Derlin [IPR007599] (2); Peptidase S54, rhomboid domain [IPR022764] (1)                                                                                                                                                                                                                                                                                                                                                                                                                                                                                    | scaffold_9_mRNA_3199.1          | C.uschii_00599_mRNA_16.1    | -                               |
| GF0024742 | 1                            | 1                        | 0                            | Hypothetical protein (2)                                                                                         |                                                                                                                                                                                                                                                                                                                                                                                                            |                                                                                                                                                                                                                                                                                                                                                                                                                                                                                                                                                           | scaffold_9_mRNA_3192.1          | C.uschii_00599_mRNA_11.1    | -                               |
| GF0024741 | 1                            | 1                        | 0                            | Hypothetical protein (2)                                                                                         |                                                                                                                                                                                                                                                                                                                                                                                                            |                                                                                                                                                                                                                                                                                                                                                                                                                                                                                                                                                           | scaffold_9_mRNA_3191.1          | C.uschii_00599_mRNA_10.1    | -                               |
| GF0024739 | 1                            | 1                        | 0                            | Ankyrin repeat family protein, putative (1); Ankyrin repeat protein (1)                                          | protein binding [GO:0005515 molecular_function] (2)                                                                                                                                                                                                                                                                                                                                                        | Ankyrin repeat [IPR002110] (2); Ankyrin repeat-containing domain [IPR020683] (2)                                                                                                                                                                                                                                                                                                                                                                                                                                                                          | scaffold_9_mRNA_3169.1          | C.uschii_00060_mRNA_6.1     | -                               |
| GF0024738 | 1                            | 1                        | 0                            | Hypothetical protein (2)                                                                                         |                                                                                                                                                                                                                                                                                                                                                                                                            |                                                                                                                                                                                                                                                                                                                                                                                                                                                                                                                                                           | scaffold_9_mRNA_3163.1          | C.uschii_00060_mRNA_12.1    | -                               |
| GF0024737 | 1                            | 1                        | 0                            | Hypothetical protein (2)                                                                                         |                                                                                                                                                                                                                                                                                                                                                                                                            |                                                                                                                                                                                                                                                                                                                                                                                                                                                                                                                                                           | scaffold_9_mRNA_3154.1          | C.uschii_00060_mRNA_20.1    | -                               |

| ID        | Num in <i>C. clementinae</i> | Num in <i>C. acutis</i> | Num in <i>P. trifoliata</i> | Note                                                                                               | GO                                                                                                                                                                                                                                                                                                                                                          | InterPro                                                                                                                                                                                                                                                                                      | Members in <i>C. clementinae</i> | Members in <i>C. acutis</i> | Members in <i>P. trifoliata</i> |
|-----------|------------------------------|-------------------------|-----------------------------|----------------------------------------------------------------------------------------------------|-------------------------------------------------------------------------------------------------------------------------------------------------------------------------------------------------------------------------------------------------------------------------------------------------------------------------------------------------------------|-----------------------------------------------------------------------------------------------------------------------------------------------------------------------------------------------------------------------------------------------------------------------------------------------|----------------------------------|-----------------------------|---------------------------------|
| GF0024736 | 1                            | 1                       | 0                           | Hypothetical protein (2)                                                                           | ATP binding [GO:0005524 molecular_function] (2); protein phosphorylation [GO:0006468 biological_process] (2); protein kinase activity [GO:0004672 molecular_function] (2)                                                                                                                                                                                   | Protein kinase domain [IPRO00719] (2); Protein kinase-like domain [IPRO11009] (2); Serine/threonine-protein kinase active site [IPRO08271] (2); PGG domain [IPRO26961] (2)                                                                                                                    | scaffold_9_mRNA_3153.1           | C_unshii_00060_mRNA_2.1     | -                               |
| GF0024735 | 1                            | 1                       | 0                           | FAD-binding Berberine family protein (2)                                                           | flavin adenine dinucleotide binding [GO:0050660 molecular_function] (2); oxidoreductase activity [GO:0016491 molecular_function] (2); oxidation-reduction process [GO:0055114 biological_process] (2); catalytic activity [GO:0003824 molecular_function] (2); oxidoreductase activity, acting on CH-OH group of donors [GO:0016614 molecular_function] (2) | Berberine/berberine-like [IPRO12951] (2); FAD-binding, type 2, subdomain 1 [IPRO16167] (2); CO dehydrogenase flavoprotein-like, FAD-binding, subdomain 2 [IPRO16169] (2); FAD linked oxidase, N-terminal [IPRO06094] (2); FAD-binding, type 2 [IPRO16166] (2)                                 | scaffold_9_mRNA_3148.1           | C_unshii_00060_mRNA_26.1    | -                               |
| GF0024734 | 1                            | 1                       | 0                           | Tetrapeptide repeat-like superfamily protein (2)                                                   | zinc ion binding [GO:0008270 molecular_function] (2); protein binding [GO:0005515 molecular_function] (2)                                                                                                                                                                                                                                                   | DYW domain [IPRO32867] (2); Ubiquitin/cytochrome c chaperone/UPF0174 [IPRO21150] (2); Pentapeptide repeat [IPRO02885] (2); Tetrapeptide-like helical domain [IPRO11990] (2)                                                                                                                   | scaffold_9_mRNA_3139.1           | C_unshii_00577_mRNA_11.1    | -                               |
| GF0024733 | 1                            | 1                       | 0                           | FAD-binding Berberine family protein (2)                                                           | catalytic activity [GO:0003824 molecular_function] (2); oxidoreductase activity, acting on CH-OH group of donors [GO:0016614 molecular_function] (2); flavin adenine dinucleotide binding [GO:0050660 molecular_function] (2); oxidoreductase activity [GO:0016491 molecular_function] (2); oxidation-reduction process [GO:0055114 biological_process] (2) | FAD-binding, type 2, subdomain 1 [IPRO16167] (2); CO dehydrogenase flavoprotein-like, FAD-binding, subdomain 2 [IPRO16169] (2); FAD linked oxidase, N-terminal [IPRO06094] (2); FAD-binding, type 2 [IPRO16166] (2); Berberine/berberine-like [IPRO12951] (1)                                 | scaffold_9_mRNA_3135.1           | C_unshii_00577_mRNA_7.1     | -                               |
| GF0024732 | 1                            | 1                       | 0                           | Hypothetical protein (2)                                                                           |                                                                                                                                                                                                                                                                                                                                                             |                                                                                                                                                                                                                                                                                               | scaffold_9_mRNA_3133.1           | C_unshii_00577_mRNA_5.1     | -                               |
| GF0024731 | 1                            | 1                       | 0                           | Ankyrin repeat family protein (2)                                                                  |                                                                                                                                                                                                                                                                                                                                                             | PGG domain [IPRO26961] (2); Ankyrin repeat-containing domain [IPRO20683] (1)                                                                                                                                                                                                                  | scaffold_9_mRNA_3129.1           | C_unshii_00577_mRNA_2.1     | -                               |
| GF0024730 | 1                            | 1                       | 0                           | Ethylene responsive element binding factor, putative (2)                                           | transcription factor activity, sequence-specific DNA binding [GO:0003700 molecular_function] (2); regulation of transcription, DNA-templated [GO:0006355 biological_process] (2); DNA binding [GO:0003677 molecular_function] (2)                                                                                                                           | DNA-binding domain [IPRO16177] (2); AP2/ERF domain [IPRO04171] (2)                                                                                                                                                                                                                            | scaffold_9_mRNA_3126.1           | C_unshii_02129_mRNA_1.1     | -                               |
| GF0024729 | 1                            | 1                       | 0                           | Hypothetical protein (2)                                                                           |                                                                                                                                                                                                                                                                                                                                                             |                                                                                                                                                                                                                                                                                               | scaffold_9_mRNA_3124.1           | C_unshii_01744_mRNA_1.1     | -                               |
| GF0024728 | 1                            | 1                       | 0                           | Hypothetical protein (2)                                                                           |                                                                                                                                                                                                                                                                                                                                                             | Transposase, MuDR, plant [IPRO04332] (2)                                                                                                                                                                                                                                                      | scaffold_9_mRNA_3119.1           | C_unshii_00504_mRNA_19.1    | -                               |
| GF0024726 | 1                            | 1                       | 0                           | Hypothetical protein (2)                                                                           | Poly(nucleosidyl) transferase, ribonuclease H-like superfamily protein (1); Putative RNA-directed DNA polymerase (1)                                                                                                                                                                                                                                        | Ribonuclease H-like domain [IPRO12337] (2)                                                                                                                                                                                                                                                    | scaffold_9_mRNA_3112.1           | C_unshii_00504_mRNA_11.1    | -                               |
| GF0024724 | 1                            | 1                       | 0                           | Hypothetical protein (2)                                                                           |                                                                                                                                                                                                                                                                                                                                                             |                                                                                                                                                                                                                                                                                               | scaffold_9_mRNA_3109.1           | C_unshii_00504_mRNA_7.1     | -                               |
| GF0024723 | 1                            | 1                       | 0                           | Hypothetical protein (1); Polynucleosidyl transferase, ribonuclease H-like superfamily protein (1) | nucleic acid binding [GO:0003676 molecular_function] (2)                                                                                                                                                                                                                                                                                                    | Ribonuclease H-like domain [IPRO12337] (2)                                                                                                                                                                                                                                                    | scaffold_9_mRNA_3106.1           | C_unshii_00504_mRNA_5.1     | -                               |
| GF0024722 | 1                            | 1                       | 0                           | Hypothetical protein (2)                                                                           |                                                                                                                                                                                                                                                                                                                                                             |                                                                                                                                                                                                                                                                                               | scaffold_9_mRNA_3100.1           | C_unshii_01088_mRNA_3.1     | -                               |
| GF0024720 | 1                            | 1                       | 0                           | Cyclin p4 (2)                                                                                      | protein kinase binding [GO:0019901 molecular_function] (2); regulation of cyclin-dependent protein serine/threonine kinase activity [GO:0000079 biological_process] (2)                                                                                                                                                                                     | Cyclin-like [IPRO13763] (2); Cyclin PHO80-like [IPRO13922] (2)                                                                                                                                                                                                                                | scaffold_9_mRNA_3093.1           | C_unshii_01088_mRNA_9.1     | -                               |
| GF0024719 | 1                            | 1                       | 0                           | YDG domain-containing protein At5g47150 (1); Hypothetical protein (1)                              | histone binding [GO:0042393 molecular_function] (2)                                                                                                                                                                                                                                                                                                         | SRA-YDG [IPRO03105] (2); PUA-like domain [IPRO15947] (2); Reverse transcriptase zinc-binding domain [IPRO26960] (1)                                                                                                                                                                           | scaffold_9_mRNA_3090.1           | C_unshii_01196_mRNA_3.1     | -                               |
| GF0024718 | 1                            | 1                       | 0                           | Protein GIGAS CELL1 (2)                                                                            | negative regulation of ubiquitin protein ligase activity [GO:190667 biological_process] (1); nucleus [GO:0005634 cellular_component] (1); regulation of nuclear division [GO:0051783 biological_process] (1)                                                                                                                                                | POLYHOME/GIGAS CELL1 [IPRO34590] (1)                                                                                                                                                                                                                                                          | scaffold_9_mRNA_3074.1           | C_unshii_00115_mRNA_23.1    | -                               |
| GF0024715 | 1                            | 1                       | 0                           | Hypothetical protein (2)                                                                           |                                                                                                                                                                                                                                                                                                                                                             |                                                                                                                                                                                                                                                                                               | scaffold_9_mRNA_3065.1           | C_unshii_00115_mRNA_30.1    | -                               |
| GF0024713 | 1                            | 1                       | 0                           | Hypothetical protein (2)                                                                           | zinc ion binding [GO:0008270 molecular_function] (2); nucleic acid binding [GO:0003676 molecular_function] (2)                                                                                                                                                                                                                                              | Reverse transcriptase zinc-binding domain [IPRO39960] (2); Ribonuclease H-like domain [IPRO12337] (2); Zinc knuckle CX2CX4HXAC [IPRO25836] (2); Zinc finger, CCHC-type [IPRO01878] (2); Domain of unknown function DUF4285 [IPRO25558] (1)                                                    | scaffold_9_mRNA_3045.1           | C_unshii_01621_mRNA_4.1     | -                               |
| GF0024712 | 1                            | 1                       | 0                           | Hypothetical protein (2)                                                                           |                                                                                                                                                                                                                                                                                                                                                             |                                                                                                                                                                                                                                                                                               | scaffold_9_mRNA_3037.1           | C_unshii_00119_mRNA_5.1     | -                               |
| GF0024711 | 1                            | 1                       | 0                           | Adenylosuccinate synthetase, chloroplast (2)                                                       | GTP binding [GO:0005525 molecular_function] (2); adenylosuccinate synthase activity [GO:0006010 molecular_function] (2); purine nucleotide biosynthetic process [GO:0006164 biological_process] (2)                                                                                                                                                         | Adenylosuccinate synthetase [IPRO01114] (2); P-loop containing nucleoside triphosphate hydrolase [IPRO27417] (2); Adenylosuccinate synthase, active site [IPRO33128] (2); Adenylosuccinate synthase, GTP-binding site [IPRO18292] (2)                                                         | scaffold_9_mRNA_3036.1           | C_unshii_00119_mRNA_6.1     | -                               |
| GF0024710 | 1                            | 1                       | 0                           | Hypothetical protein (2)                                                                           | nucleic acid binding [GO:0003676 molecular_function] (2)                                                                                                                                                                                                                                                                                                    | Ribonuclease H-like domain [IPRO12337] (2); T82/DPI/HVA22-related protein [IPRO04345] (1)                                                                                                                                                                                                     | scaffold_9_mRNA_3029.1           | C_unshii_00119_mRNA_12.1    | -                               |
| GF0024707 | 1                            | 1                       | 0                           | Hypothetical protein (2)                                                                           |                                                                                                                                                                                                                                                                                                                                                             |                                                                                                                                                                                                                                                                                               | scaffold_9_mRNA_2998.1           | C_unshii_00119_mRNA_41.1    | -                               |
| GF0024706 | 1                            | 1                       | 0                           | Hypothetical protein (2)                                                                           |                                                                                                                                                                                                                                                                                                                                                             |                                                                                                                                                                                                                                                                                               | scaffold_9_mRNA_2987.1           | C_unshii_01689_mRNA_5.1     | -                               |
| GF0024705 | 1                            | 1                       | 0                           | Hypothetical protein (2)                                                                           |                                                                                                                                                                                                                                                                                                                                                             |                                                                                                                                                                                                                                                                                               | scaffold_9_mRNA_2984.1           | C_unshii_00751_mRNA_12.1    | -                               |
| GF0024704 | 1                            | 1                       | 0                           | Hypothetical protein (2)                                                                           |                                                                                                                                                                                                                                                                                                                                                             |                                                                                                                                                                                                                                                                                               | scaffold_9_mRNA_2983.1           | C_unshii_00751_mRNA_11.1    | -                               |
| GF0024702 | 1                            | 1                       | 0                           | Hypothetical protein (2)                                                                           |                                                                                                                                                                                                                                                                                                                                                             |                                                                                                                                                                                                                                                                                               | scaffold_9_mRNA_2939.1           | C_unshii_01777_mRNA_4.1     | -                               |
| GF0024701 | 1                            | 1                       | 0                           | Truncated RB (1); Hypothetical protein (1)                                                         | ADP binding [GO:0043531 molecular_function] (2); DNA binding [GO:0003677 molecular_function] (1); regulation of transcription, DNA-templated [GO:0006355 biological_process] (1); transcription factor activity, sequence-specific DNA binding [GO:0003700 molecular_function] (1)                                                                          | P-loop containing nucleoside triphosphate hydrolase [IPRO27417] (2); NB-ARC [IPRO02182] (2); AP2/ERF domain [IPRO04171] (2); DNA-binding domain [IPRO16177] (1)                                                                                                                               | scaffold_9_mRNA_2931.1           | C_unshii_01467_mRNA_2.1     | -                               |
| GF0024699 | 1                            | 1                       | 0                           | Hypothetical protein (2)                                                                           |                                                                                                                                                                                                                                                                                                                                                             |                                                                                                                                                                                                                                                                                               | scaffold_9_mRNA_2912.1           | C_unshii_00132_mRNA_6.1     | -                               |
| GF0024698 | 1                            | 1                       | 0                           | LRR receptor-like kinase family protein (2)                                                        | protein binding [GO:0005515 molecular_function] (2); protein phosphorylation [GO:0006468 biological_process] (1); protein kinase activity [GO:0004672 molecular_function] (1)                                                                                                                                                                               | Leucine-rich repeat-containing N-terminal, plant-type [IPRO13210] (2); Leucine-rich repeat [IPRO01611] (2); Leucine-rich repeat domain, L, domain-like [IPRO32675] (2); Serine-threonine/tyrosine-protein kinase, catalytic domain [IPRO1245] (1); Protein kinase-like domain [IPRO11009] (1) | scaffold_9_mRNA_2903.1           | C_unshii_00132_mRNA_9.1     | -                               |
| GF0024697 | 1                            | 1                       | 0                           | Hypothetical protein (2)                                                                           |                                                                                                                                                                                                                                                                                                                                                             |                                                                                                                                                                                                                                                                                               | scaffold_9_mRNA_2902.1           | C_unshii_00132_mRNA_10.1    | -                               |
| GF0024695 | 1                            | 1                       | 0                           | Fragile histidine triad protein (2)                                                                | catalytic activity [GO:0003824 molecular_function] (2)                                                                                                                                                                                                                                                                                                      | HIT-like domain [IPRO11146] (2); Histidine triad (HT) protein [IPRO01310] (2); Histidine triad, conserved site [IPRO19808] (2)                                                                                                                                                                | scaffold_9_mRNA_2891.1           | C_unshii_02647_mRNA_1.1     | -                               |
| GF0024694 | 1                            | 1                       | 0                           | Hypothetical protein (2)                                                                           | protein kinase activity [GO:0004672 molecular_function] (2); protein phosphorylation [GO:0006468 biological_process] (2); ATP binding [GO:0005524 molecular_function] (2)                                                                                                                                                                                   | Protein kinase domain [IPRO00719] (2); Protein kinase-like domain [IPRO11009] (2)                                                                                                                                                                                                             | scaffold_9_mRNA_2881.1           | C_unshii_00132_mRNA_30.1    | -                               |
| GF0024693 | 1                            | 1                       | 0                           | Hypothetical protein (2)                                                                           | cysteine-type peptidase activity [GO:0008234 molecular_function] (2); proteolysis [GO:0006508 biological_process] (2)                                                                                                                                                                                                                                       | Transposon, Ent/Spm-like [IPRO04242] (2); Ub1 protease family, C-terminal catalytic domain [IPRO03653] (2)                                                                                                                                                                                    | scaffold_9_mRNA_2880.1           | C_unshii_00132_mRNA_32.1    | -                               |
| GF0024692 | 1                            | 1                       | 0                           | Hypothetical protein (2)                                                                           | cation transmembrane transporter activity [GO:0008324 molecular_function] (1); integral component of membrane [GO:0016021 cellular_component] (1); cation transport [GO:0008012 biological_process] (1); transmembrane transport [GO:0055085 biological_process] (1)                                                                                        | Cation efflux protein transmembrane domain [IPRO27469] (1); Cation efflux protein [IPRO02524] (1)                                                                                                                                                                                             | scaffold_9_mRNA_2878.1           | C_unshii_00132_mRNA_34.1    | -                               |
| GF0024691 | 1                            | 1                       | 0                           | Hypothetical protein (2)                                                                           |                                                                                                                                                                                                                                                                                                                                                             |                                                                                                                                                                                                                                                                                               | scaffold_9_mRNA_2876.1           | C_unshii_01177_mRNA_8.1     | -                               |
| GF0024690 | 1                            | 1                       | 0                           | Hypothetical protein (2)                                                                           | DNA binding [GO:0003677 molecular_function] (2); protein dimerization activity [GO:0046983 molecular_function] (2)                                                                                                                                                                                                                                          | Transcription factor, MADS-box [IPRO02100] (2)                                                                                                                                                                                                                                                | scaffold_9_mRNA_2872.1           | C_unshii_01156_mRNA_10.1    | -                               |
| GF0024689 | 1                            | 1                       | 0                           | Hypothetical protein (2)                                                                           |                                                                                                                                                                                                                                                                                                                                                             |                                                                                                                                                                                                                                                                                               | scaffold_9_mRNA_2865.1           | C_unshii_00879_mRNA_4.1     | -                               |
| GF0024688 | 1                            | 1                       | 0                           | MADS-box transcription factor family protein (2)                                                   | DNA binding [GO:0003677 molecular_function] (2); protein dimerization activity [GO:0046983 molecular_function] (2)                                                                                                                                                                                                                                          | Transcription factor, MADS-box [IPRO02100] (2)                                                                                                                                                                                                                                                | scaffold_9_mRNA_2864.1           | C_unshii_00879_mRNA_5.1     | -                               |
| GF0024687 | 1                            | 1                       | 0                           | Hypothetical protein (2)                                                                           |                                                                                                                                                                                                                                                                                                                                                             |                                                                                                                                                                                                                                                                                               | scaffold_9_mRNA_2859.1           | C_unshii_01550_mRNA_2.1     | -                               |
| GF0024686 | 1                            | 1                       | 0                           | Hypothetical protein (2)                                                                           |                                                                                                                                                                                                                                                                                                                                                             |                                                                                                                                                                                                                                                                                               | scaffold_9_mRNA_2857.1           | C_unshii_01550_mRNA_4.1     | -                               |
| GF0024685 | 1                            | 1                       | 0                           | Hypothetical protein (2)                                                                           |                                                                                                                                                                                                                                                                                                                                                             |                                                                                                                                                                                                                                                                                               | scaffold_9_mRNA_2840.1           | C_unshii_01096_mRNA_7.1     | -                               |
| GF0024681 | 1                            | 1                       | 0                           | Hypothetical protein (2)                                                                           |                                                                                                                                                                                                                                                                                                                                                             |                                                                                                                                                                                                                                                                                               | scaffold_9_mRNA_2830.1           | C_unshii_00451_mRNA_3.1     | -                               |

| ID        | Num. in <i>C. caryophyllata</i> | Num. in <i>C. acanthina</i> | Num. in <i>P. trifoliata</i> | Note                                                                          | GO                                                                                                                                                                                                                                                                                                                                                                                  | InterPro                                                                                                                                                                                                                                                                                                                          | Members in <i>C. caryophyllata</i> | Members in <i>C. acanthina</i> | Members in <i>P. trifoliata</i> |
|-----------|---------------------------------|-----------------------------|------------------------------|-------------------------------------------------------------------------------|-------------------------------------------------------------------------------------------------------------------------------------------------------------------------------------------------------------------------------------------------------------------------------------------------------------------------------------------------------------------------------------|-----------------------------------------------------------------------------------------------------------------------------------------------------------------------------------------------------------------------------------------------------------------------------------------------------------------------------------|------------------------------------|--------------------------------|---------------------------------|
| GF0024680 | 1                               | 1                           | 0                            | MADS-box transcription factor family protein (1); Hypothetical protein (1)    | protein dimerization activity [GO:0046983 molecular_function] (2); DNA binding [GO:0003677 molecular_function] (2)                                                                                                                                                                                                                                                                  | Transcription factor, MADS-box [IPR002100] (2)                                                                                                                                                                                                                                                                                    | scaffold_9_mRNA_2819.1             | C_unshiu_00829_mRNA_1.1        | -                               |
| GF0024679 | 1                               | 1                           | 0                            | Hypothetical protein (2)                                                      | protein phosphorylation [GO:0006468 biological_process] (2); protein kinase activity [GO:0004872 molecular_function] (2); ATP binding [GO:0005524 molecular_function] (2)                                                                                                                                                                                                           | Protein kinase-like domain [IPR011009] (2); Protein kinase domain [IPR000119] (2); Serine-threonine/tyrosine-protein kinase catalytic domain [IPR001245] (1); Serine-threonine/tyrosine-protein kinase, catalytic domain [IPR012451] (1)                                                                                          | scaffold_9_mRNA_2817.1             | C_unshiu_00222_mRNA_25.1       | -                               |
| GF0024678 | 1                               | 1                           | 0                            | AP2 type transcription factor (2)                                             | DNA binding [GO:0003677 molecular_function] (2); regulation of transcription, DNA-templated [GO:0006355 biological_process] (2); transcription factor activity, sequence-specific DNA binding [GO:0003700 molecular_function] (2); multicellular organismal development [GO:0007275 biological_process] (1); multicellular organism development [GO:0007275 biological_process] (1) | DNA-binding domain [IPR016177] (2); AP2-like ethylene-responsive transcription factor [IPR031112] (2); AP2/ERF domain [IPR001471] (2)                                                                                                                                                                                             | scaffold_9_mRNA_2804.1             | C_unshiu_00222_mRNA_19.1       | -                               |
| GF0024677 | 1                               | 1                           | 0                            | Hypothetical protein (2)                                                      | ATP binding [GO:0005524 molecular_function] (2); transporter activity [GO:0005215 molecular_function] (2); transport [GO:0006810 biological_process] (2); ATPase activity [GO:0016887 molecular_function] (2); integral component of membrane [GO:0016021 cellular_component] (2)                                                                                                   | AAA+ ATPase domain [IPR003593] (2); ABC transporter A, ABCA [IPR026082] (2); ABC transporter-like [IPR03439] (2); P-loop containing nucleoside triphosphate hydrolase [IPR027417] (2); ABC transporter, conserved site [IPR017871] (2)                                                                                            | scaffold_9_mRNA_2801.2             | C_unshiu_00222_mRNA_15.2       | -                               |
| GF0024676 | 1                               | 1                           | 0                            | Hypothetical protein (2)                                                      |                                                                                                                                                                                                                                                                                                                                                                                     | Gag-polypeptide of LTR copia-type [IPR029472] (1)                                                                                                                                                                                                                                                                                 | scaffold_9_mRNA_2800.1             | C_unshiu_00222_mRNA_14.1       | -                               |
| GF0024675 | 1                               | 1                           | 0                            | Hypothetical protein (2)                                                      |                                                                                                                                                                                                                                                                                                                                                                                     |                                                                                                                                                                                                                                                                                                                                   | scaffold_9_mRNA_2793.1             | C_unshiu_00222_mRNA_7.1        | -                               |
| GF0024674 | 1                               | 1                           | 0                            | Hypothetical protein (2)                                                      |                                                                                                                                                                                                                                                                                                                                                                                     |                                                                                                                                                                                                                                                                                                                                   | scaffold_9_mRNA_2790.1             | C_unshiu_01023_mRNA_2.1        | -                               |
| GF0024673 | 1                               | 1                           | 0                            | Glycoprotein family protein (2)                                               | mitochondrial matrix [GO:0005759 cellular_component] (2)                                                                                                                                                                                                                                                                                                                            | Mitochondrial glycoprotein [IPR003428] (2)                                                                                                                                                                                                                                                                                        | scaffold_9_mRNA_2772.2             | C_unshiu_00148_mRNA_17.2       | -                               |
| GF0024672 | 1                               | 1                           | 0                            | Hypothetical protein (2)                                                      | nucleic acid binding [GO:0003676 molecular_function] (2)                                                                                                                                                                                                                                                                                                                            | Ribonuclease H-like domain [IPR012337] (2)                                                                                                                                                                                                                                                                                        | scaffold_9_mRNA_2771.1             | C_unshiu_02385_mRNA_2.1        | -                               |
| GF0024671 | 1                               | 1                           | 0                            | Plasma membrane-type calcium ATPase (1); Hypothetical protein (1)             | calmodulin binding [GO:0005516 molecular_function] (1); integral component of membrane [GO:0016021 cellular_component] (1)                                                                                                                                                                                                                                                          | P-type ATPase, transmembrane domain [IPR023298] (2); Cation-transporting P-type ATPase, C-terminal [IPR006088] (2); P-type ATPase [IPR001757] (1); Probable transposase, Pta/En/Spm, plant [IPR004252] (1); Calcium-transporting P-type ATPase, N-terminal autoinhibitory domain [IPR024790] (1); HAD-like domain [IPR023214] (1) | scaffold_9_mRNA_2767.1             | C_unshiu_02385_mRNA_1.1        | -                               |
| GF0024669 | 1                               | 1                           | 0                            | Hypothetical protein (2)                                                      |                                                                                                                                                                                                                                                                                                                                                                                     | Retroviral aspartyl protease [IPR013242] (2); Aspartic peptidase domain [IPR02109] (2)                                                                                                                                                                                                                                            | scaffold_9_mRNA_2757.1             | C_unshiu_00645_mRNA_8.1        | -                               |
| GF0024668 | 1                               | 1                           | 0                            | Hypothetical protein (2)                                                      |                                                                                                                                                                                                                                                                                                                                                                                     | Domain of unknown function DUF4216 [IPR02512] (2); Probable transposase, Pta/En/Spm, plant [IPR004252] (2); Domain of unknown function DUF4218 [IPR025452] (1); LOG family [IPR031100] (1); Transposase-associated domain [IPR024880] (1)                                                                                         | scaffold_9_mRNA_2752.1             | C_unshiu_02971_mRNA_1.1        | -                               |
| GF0024666 | 1                               | 1                           | 0                            | Hypothetical protein (2)                                                      |                                                                                                                                                                                                                                                                                                                                                                                     | Endonuclease/exonuclease/phosphatase [IPR005135] (2)                                                                                                                                                                                                                                                                              | scaffold_9_mRNA_2738.1             | C_unshiu_00295_mRNA_15.1       | -                               |
| GF0024665 | 1                               | 1                           | 0                            | Hypothetical protein (2)                                                      |                                                                                                                                                                                                                                                                                                                                                                                     |                                                                                                                                                                                                                                                                                                                                   | scaffold_9_mRNA_2736.1             | C_unshiu_00295_mRNA_13.1       | -                               |
| GF0024664 | 1                               | 1                           | 0                            | Hypothetical protein (2)                                                      |                                                                                                                                                                                                                                                                                                                                                                                     |                                                                                                                                                                                                                                                                                                                                   | scaffold_9_mRNA_2735.1             | C_unshiu_00295_mRNA_12.1       | -                               |
| GF0024663 | 1                               | 1                           | 0                            | Hypothetical protein (2)                                                      |                                                                                                                                                                                                                                                                                                                                                                                     |                                                                                                                                                                                                                                                                                                                                   | scaffold_9_mRNA_2734.1             | C_unshiu_00295_mRNA_11.1       | -                               |
| GF0024662 | 1                               | 1                           | 0                            | Hypothetical protein (2)                                                      |                                                                                                                                                                                                                                                                                                                                                                                     | Cysteine-rich transmembrane CYSTM domain [IPR028144] (1)                                                                                                                                                                                                                                                                          | scaffold_9_mRNA_2731.1             | C_unshiu_00295_mRNA_9.1        | -                               |
| GF0024661 | 1                               | 1                           | 0                            | Hypothetical protein (2)                                                      |                                                                                                                                                                                                                                                                                                                                                                                     |                                                                                                                                                                                                                                                                                                                                   | scaffold_9_mRNA_2730.1             | C_unshiu_00295_mRNA_8.1        | -                               |
| GF0024660 | 1                               | 1                           | 0                            | Hypothetical protein (2)                                                      |                                                                                                                                                                                                                                                                                                                                                                                     |                                                                                                                                                                                                                                                                                                                                   | scaffold_9_mRNA_273.1              | C_unshiu_00060_mRNA_16.1       | -                               |
| GF0024659 | 1                               | 1                           | 0                            | Hypothetical protein (2)                                                      | nucleic acid binding [GO:0003676 molecular_function] (2); protein dimerization activity [GO:0046983 molecular_function] (2)                                                                                                                                                                                                                                                         | Ribonuclease H-like domain [IPR012337] (2); HAT, C-terminal dimerization domain [IPR008906] (2)                                                                                                                                                                                                                                   | scaffold_9_mRNA_2727.1             | C_unshiu_00295_mRNA_5.1        | -                               |
| GF0024658 | 1                               | 1                           | 0                            | Ribonuclease H protein, putative (1); Hypothetical protein (1)                |                                                                                                                                                                                                                                                                                                                                                                                     | Reverse transcriptase zinc-binding domain [IPR026960] (2); Reverse transcriptase domain [IPR000477] (1); Chromo domain-like [IPR01697] (1)                                                                                                                                                                                        | scaffold_9_mRNA_2723.1             | C_unshiu_00295_mRNA_2.1        | -                               |
| GF0024657 | 1                               | 1                           | 0                            | Hypothetical protein (2)                                                      |                                                                                                                                                                                                                                                                                                                                                                                     | Domain of unknown function DUF4283 [IPR025558] (1)                                                                                                                                                                                                                                                                                | scaffold_9_mRNA_2721.1             | C_unshiu_00295_mRNA_1.1        | -                               |
| GF0024656 | 1                               | 1                           | 0                            | Hypothetical protein (2)                                                      |                                                                                                                                                                                                                                                                                                                                                                                     |                                                                                                                                                                                                                                                                                                                                   | scaffold_9_mRNA_2715.1             | C_unshiu_00331_mRNA_15.1       | -                               |
| GF0024655 | 1                               | 1                           | 0                            | Putative COX1/COX3 intron 2 protein (2)                                       | metabolic process [GO:0008152 biological_process] (2); catalytic activity [GO:0003824 molecular_function] (2); mRNA processing [GO:0006397 biological_process] (2)                                                                                                                                                                                                                  | Domain X [IPR024937] (2); Ctp/cromotome-like domain [IPR029045] (2); Cromotome superfamily [IPR001753] (2); Reverse transcriptase domain [IPR000477] (2)                                                                                                                                                                          | scaffold_9_mRNA_2714.1             | C_unshiu_00331_mRNA_16.1       | -                               |
| GF0024654 | 1                               | 1                           | 0                            | Hypothetical protein (2)                                                      |                                                                                                                                                                                                                                                                                                                                                                                     |                                                                                                                                                                                                                                                                                                                                   | scaffold_9_mRNA_2711.1             | C_unshiu_00391_mRNA_20.1       | -                               |
| GF0024653 | 1                               | 1                           | 0                            | Hypothetical protein (2)                                                      | nucleic acid binding [GO:0003676 molecular_function] (2); protein dimerization activity [GO:0046983 molecular_function] (2)                                                                                                                                                                                                                                                         | Ribonuclease H-like domain [IPR012337] (2); HAT, C-terminal dimerization domain [IPR008906] (2)                                                                                                                                                                                                                                   | scaffold_9_mRNA_2705.1             | C_unshiu_00391_mRNA_17.1       | -                               |
| GF0024652 | 1                               | 1                           | 0                            | Hypothetical protein (2)                                                      |                                                                                                                                                                                                                                                                                                                                                                                     |                                                                                                                                                                                                                                                                                                                                   | scaffold_9_mRNA_2703.1             | C_unshiu_00391_mRNA_15.1       | -                               |
| GF0024651 | 1                               | 1                           | 0                            | Hypothetical protein (2)                                                      |                                                                                                                                                                                                                                                                                                                                                                                     |                                                                                                                                                                                                                                                                                                                                   | scaffold_9_mRNA_2702.1             | C_unshiu_00391_mRNA_14.1       | -                               |
| GF0024650 | 1                               | 1                           | 0                            | Hypothetical protein (2)                                                      |                                                                                                                                                                                                                                                                                                                                                                                     | Endonuclease/exonuclease/phosphatase [IPR005135] (2)                                                                                                                                                                                                                                                                              | scaffold_9_mRNA_2701.1             | C_unshiu_00391_mRNA_13.1       | -                               |
| GF0024649 | 1                               | 1                           | 0                            | UDP-glucuronic acid decarboxylase 1 (2)                                       |                                                                                                                                                                                                                                                                                                                                                                                     | NAD(P)-binding domain [IPR016040] (2)                                                                                                                                                                                                                                                                                             | scaffold_9_mRNA_270.1              | C_unshiu_00036_mRNA_19.1       | -                               |
| GF0024648 | 1                               | 1                           | 0                            | Xyloglucan galactosyltransferase 0 KATAMAR1 (1); Hypothetical protein (1)     |                                                                                                                                                                                                                                                                                                                                                                                     | Exostosin-like [IPR004263] (2)                                                                                                                                                                                                                                                                                                    | scaffold_9_mRNA_2698.1             | C_unshiu_00391_mRNA_9.1        | -                               |
| GF0024647 | 1                               | 1                           | 0                            | Hypothetical protein (2)                                                      |                                                                                                                                                                                                                                                                                                                                                                                     |                                                                                                                                                                                                                                                                                                                                   | scaffold_9_mRNA_2691.1             | C_unshiu_00391_mRNA_5.1        | -                               |
| GF0024646 | 1                               | 1                           | 0                            | Hypothetical protein (2)                                                      |                                                                                                                                                                                                                                                                                                                                                                                     |                                                                                                                                                                                                                                                                                                                                   | scaffold_9_mRNA_2684.1             | C_unshiu_01282_mRNA_9.1        | -                               |
| GF0024645 | 1                               | 1                           | 0                            | Hypothetical protein (2)                                                      |                                                                                                                                                                                                                                                                                                                                                                                     |                                                                                                                                                                                                                                                                                                                                   | scaffold_9_mRNA_2683.1             | C_unshiu_01282_mRNA_8.1        | -                               |
| GF0024644 | 1                               | 1                           | 0                            | Phylloplastin (1); Hypothetical protein (1)                                   |                                                                                                                                                                                                                                                                                                                                                                                     |                                                                                                                                                                                                                                                                                                                                   | scaffold_9_mRNA_268.1              | C_unshiu_00036_mRNA_23.1       | -                               |
| GF0024643 | 1                               | 1                           | 0                            | Hypothetical protein (2)                                                      |                                                                                                                                                                                                                                                                                                                                                                                     |                                                                                                                                                                                                                                                                                                                                   | scaffold_9_mRNA_266.1              | C_unshiu_00093_mRNA_26.1       | -                               |
| GF0024642 | 1                               | 1                           | 0                            | Hypothetical protein (2)                                                      |                                                                                                                                                                                                                                                                                                                                                                                     |                                                                                                                                                                                                                                                                                                                                   | scaffold_9_mRNA_266.8              | C_unshiu_00290_mRNA_12.1       | -                               |
| GF0024641 | 1                               | 1                           | 0                            | Hypothetical protein (2)                                                      |                                                                                                                                                                                                                                                                                                                                                                                     |                                                                                                                                                                                                                                                                                                                                   | scaffold_9_mRNA_264.0              | C_unshiu_00444_mRNA_6.1        | -                               |
| GF0024639 | 1                               | 1                           | 0                            | Hypothetical protein (2)                                                      |                                                                                                                                                                                                                                                                                                                                                                                     |                                                                                                                                                                                                                                                                                                                                   | scaffold_9_mRNA_262.3              | C_unshiu_01247_mRNA_10.1       | -                               |
| GF0024638 | 1                               | 1                           | 0                            | Hypothetical protein (2)                                                      |                                                                                                                                                                                                                                                                                                                                                                                     |                                                                                                                                                                                                                                                                                                                                   | scaffold_9_mRNA_262.0              | C_unshiu_01247_mRNA_8.1        | -                               |
| GF0024637 | 1                               | 1                           | 0                            | Hypothetical protein (2)                                                      |                                                                                                                                                                                                                                                                                                                                                                                     |                                                                                                                                                                                                                                                                                                                                   | scaffold_9_mRNA_261.8              | C_unshiu_01247_mRNA_6.1        | -                               |
| GF0024635 | 1                               | 1                           | 0                            | Hypothetical protein (2)                                                      |                                                                                                                                                                                                                                                                                                                                                                                     | Domain of unknown function DUF4283 [IPR025558] (1)                                                                                                                                                                                                                                                                                | scaffold_9_mRNA_260.1              | C_unshiu_00454_mRNA_10.1       | -                               |
| GF0024634 | 1                               | 1                           | 0                            | Hypothetical protein (2)                                                      |                                                                                                                                                                                                                                                                                                                                                                                     |                                                                                                                                                                                                                                                                                                                                   | scaffold_9_mRNA_2595.1             | C_unshiu_00046_mRNA_3.1        | -                               |
| GF0024633 | 1                               | 1                           | 0                            | Hypothetical protein (2)                                                      |                                                                                                                                                                                                                                                                                                                                                                                     |                                                                                                                                                                                                                                                                                                                                   | scaffold_9_mRNA_2581.1             | C_unshiu_00160_mRNA_41.1       | -                               |
| GF0024632 | 1                               | 1                           | 0                            | Hypothetical protein (2)                                                      |                                                                                                                                                                                                                                                                                                                                                                                     |                                                                                                                                                                                                                                                                                                                                   | scaffold_9_mRNA_2580.1             | C_unshiu_00160_mRNA_40.1       | -                               |
| GF0024631 | 1                               | 1                           | 0                            | Beta 1,3 glucanase (2)                                                        | carbohydrate metabolic process [GO:0005975 biological_process] (2); hydrolase activity, hydrolyzing O-glycosyl compounds [GO:0004553 molecular_function] (2)                                                                                                                                                                                                                        | Glycoside hydrolase superfamily [IPR017853] (2); Glycoside hydrolase family 17 [IPR004900] (2); Glycoside hydrolase, catalytic domain [IPR013781] (1)                                                                                                                                                                             | scaffold_9_mRNA_2578.1             | C_unshiu_00160_mRNA_38.1       | -                               |
| GF0024630 | 1                               | 1                           | 0                            | Hypothetical protein (2)                                                      |                                                                                                                                                                                                                                                                                                                                                                                     |                                                                                                                                                                                                                                                                                                                                   | scaffold_9_mRNA_2567.1             | C_unshiu_00160_mRNA_27.1       | -                               |
| GF0024629 | 1                               | 1                           | 0                            | Hypothetical protein (2)                                                      |                                                                                                                                                                                                                                                                                                                                                                                     |                                                                                                                                                                                                                                                                                                                                   | scaffold_9_mRNA_2566.1             | C_unshiu_00160_mRNA_26.1       | -                               |
| GF0024628 | 1                               | 1                           | 0                            | Hypothetical protein (2)                                                      |                                                                                                                                                                                                                                                                                                                                                                                     |                                                                                                                                                                                                                                                                                                                                   | scaffold_9_mRNA_2554.1             | C_unshiu_01758_mRNA_8.1        | -                               |
| GF0024625 | 1                               | 1                           | 0                            | Hypothetical protein (2)                                                      |                                                                                                                                                                                                                                                                                                                                                                                     |                                                                                                                                                                                                                                                                                                                                   | scaffold_9_mRNA_2539.1             | C_unshiu_00064_mRNA_66.1       | -                               |
| GF0024624 | 1                               | 1                           | 0                            | Epoxide hydrolase (2)                                                         | catalytic activity [GO:0003824 molecular_function] (2)                                                                                                                                                                                                                                                                                                                              | Protein kinase-like domain [IPR011009] (2); Alpha-Beta hydrolase fold [IPR029058] (2); Alpha/beta hydrolase fold-1 [IPR000073] (2); Epoxide hydrolase-like [IPR006099] (2)                                                                                                                                                        | scaffold_9_mRNA_2531.1             | C_unshiu_00614_mRNA_23.1       | -                               |
| GF0024623 | 1                               | 1                           | 0                            | Protein FARI-RELATED SEQUENCE 6 (2)                                           | regulation of transcription, DNA-templated [GO:0006355 biological_process] (2); zinc ion binding [GO:0008270 molecular_function] (2)                                                                                                                                                                                                                                                | FAR1 DNA binding domain [IPR004330] (2); FHY3/FAR1 family [IPR031032] (2); Zinc finger, SWIM-type [IPR007527] (2); MULE transposase domain [IPR03289] (2); Zinc finger, PMZ-type [IPR006564] (2)                                                                                                                                  | scaffold_9_mRNA_2520.1             | C_unshiu_00345_mRNA_15.1       | -                               |
| GF0024622 | 1                               | 1                           | 0                            | Hypothetical protein (2)                                                      |                                                                                                                                                                                                                                                                                                                                                                                     |                                                                                                                                                                                                                                                                                                                                   | scaffold_9_mRNA_2513.1             | C_unshiu_02090_mRNA_2.1        | -                               |
| GF0024621 | 1                               | 1                           | 0                            | Hypothetical protein (2)                                                      |                                                                                                                                                                                                                                                                                                                                                                                     |                                                                                                                                                                                                                                                                                                                                   | scaffold_9_mRNA_2505.1             | C_unshiu_00082_mRNA_26.1       | -                               |
| GF0024620 | 1                               | 1                           | 0                            | LRR receptor-like kinase family protein (2)                                   | protein binding [GO:0005515 molecular_function] (2)                                                                                                                                                                                                                                                                                                                                 | Leucine-rich repeat [IPR016111] (2); Leucine-rich repeat-containing N-terminal, plant-type [IPR013210] (2); Leucine-rich repeat domain, L domain-like [IPR032925] (2); Leucine-rich repeat, typical subtype [IPR003591] (2)                                                                                                       | scaffold_9_mRNA_2502.1             | C_unshiu_00148_mRNA_2.1        | -                               |
| GF0024619 | 1                               | 1                           | 0                            | Hypothetical protein (2)                                                      | nucleic acid binding [GO:0003676 molecular_function] (2)                                                                                                                                                                                                                                                                                                                            | Ribonuclease H-like domain [IPR012337] (2)                                                                                                                                                                                                                                                                                        | scaffold_9_mRNA_2500.1             | C_unshiu_00148_mRNA_6.1        | -                               |
| GF0024618 | 1                               | 1                           | 0                            | Epoxide hydrolase 2 (1); Epoxide hydrolase (1)                                | catalytic activity [GO:0003824 molecular_function] (2)                                                                                                                                                                                                                                                                                                                              | Epoxide hydrolase-like [IPR006099] (2); Alpha/beta hydrolase fold-1 [IPR000073] (2); Alpha/Beta hydrolase fold [IPR029058] (2)                                                                                                                                                                                                    | scaffold_9_mRNA_250.1              | C_unshiu_00046_mRNA_5.1        | -                               |
| GF0024615 | 1                               | 1                           | 0                            | Non-LTR retroelement reverse 0 transposase-like (1); Hypothetical protein (1) | nucleic acid binding [GO:0003676 molecular_function] (2); DNA binding [GO:0003677 molecular_function] (1); protein dimerization activity [GO:0046983 molecular_function] (1)                                                                                                                                                                                                        | Ribonuclease H-like domain [IPR012337] (2); Reverse transcriptase zinc-binding domain [IPR026960] (2); Alcholate-scute transcription factor-related [IPR015660] (1); Myc-type, basic helix-loop-helix (bHLH) domain [IPR011598] (1); TB2/DP1/HA22-related protein [IPR04345] (1)                                                  | scaffold_9_mRNA_2468.1             | C_unshiu_00011_mRNA_86.1       | -                               |



| ID        | Num. in <i>C. clementinae</i> | Num. in <i>C. acutis</i> | Num. in <i>P. trifoliata</i> | Note                                                                         | GO                                                                                                                                                                                                                                                                                                                                                                                              | InterPro                                                                                                                                                                                                                                                                                                                                                                                                                                          | Members in <i>C. clementinae</i> | Members in <i>C. acutis</i> | Members in <i>P. trifoliata</i> |
|-----------|-------------------------------|--------------------------|------------------------------|------------------------------------------------------------------------------|-------------------------------------------------------------------------------------------------------------------------------------------------------------------------------------------------------------------------------------------------------------------------------------------------------------------------------------------------------------------------------------------------|---------------------------------------------------------------------------------------------------------------------------------------------------------------------------------------------------------------------------------------------------------------------------------------------------------------------------------------------------------------------------------------------------------------------------------------------------|----------------------------------|-----------------------------|---------------------------------|
| GF0024522 | 1                             | 1                        | 0                            | Glycosylase hydrolase family 28 protein (2)                                  | carbohydrate metabolic process [GO:0005975 biological_process] (2);<br>polysaccharutase activity [GO:0004656 molecular_function] (2)                                                                                                                                                                                                                                                            | Protein of unknown function DUF4602 [IPRO2973] (2); Pectin lyase fold virulence factor [IPRO11050] (2); Pectin lyase fold [IPRO12334] (2); Glycosylase hydrolase, family 28 [IPRO0743] (3); Parallel beta-beta repeat [IPRO06626] (2)                                                                                                                                                                                                             | scaffold_9_mRNA_2122             | C.usmhu_00355_mRNA_232      |                                 |
| GF0024521 | 1                             | 1                        | 0                            | Pol polyprotein (1); Copia ltr rider (1)                                     |                                                                                                                                                                                                                                                                                                                                                                                                 | Reverse transcriptase, RNA-dependent DNA polymerase [IPRO31103] (2)<br>GAG-pro-integrase domain [IPRO25724] (2)                                                                                                                                                                                                                                                                                                                                   | scaffold_9_mRNA_2115.1           | C.usmhu_00122_mRNA_30.1     |                                 |
| GF0024520 | 1                             | 1                        | 0                            | Hypothetical protein (2)                                                     |                                                                                                                                                                                                                                                                                                                                                                                                 |                                                                                                                                                                                                                                                                                                                                                                                                                                                   | scaffold_9_mRNA_2114.1           | C.usmhu_00122_mRNA_31.1     |                                 |
| GF0024519 | 1                             | 1                        | 0                            | Hypothetical protein (2)                                                     |                                                                                                                                                                                                                                                                                                                                                                                                 |                                                                                                                                                                                                                                                                                                                                                                                                                                                   | scaffold_9_mRNA_2108.1           | C.usmhu_00122_mRNA_37.1     |                                 |
| GF0024518 | 1                             | 1                        | 0                            | Hypothetical protein (2)                                                     |                                                                                                                                                                                                                                                                                                                                                                                                 |                                                                                                                                                                                                                                                                                                                                                                                                                                                   | scaffold_9_mRNA_2106.1           | C.usmhu_00122_mRNA_39.1     |                                 |
| GF0024517 | 1                             | 1                        | 0                            | Glycine hydroxymethyltransferase (2)                                         | L-serine metabolic process [GO:0006563 biological_process] (2); glycine metabolic process [GO:0006544 biological_process] (2); pyridoxal phosphate binding [GO:0030170 molecular_function] (2); transferase activity [GO:0016740 molecular_function] (2); catalytic activity [GO:0003824 molecular_function] (2); glycine hydroxymethyltransferase activity [GO:0004372 molecular_function] (2) | Pyridoxal phosphate-dependent transferase, major region, subdomain 1 [IPRO15421] (2); Serine hydroxymethyltransferase, pyridoxal phosphate binding site [IPRO19798] (2); Pyridoxal phosphate-dependent transferase [IPRO15424] (2); Serine hydroxymethyltransferase [IPRO01085] (2); Pyridoxal phosphate-dependent transferase, subdomain 2 [IPRO15422] (1); Pyridoxal phosphate-dependent transferase, major region, subdomain 2 [IPRO15423] (1) | scaffold_9_mRNA_2103.1           | C.usmhu_00122_mRNA_42.1     |                                 |
| GF0024516 | 1                             | 1                        | 0                            | Hypothetical protein (2)                                                     |                                                                                                                                                                                                                                                                                                                                                                                                 |                                                                                                                                                                                                                                                                                                                                                                                                                                                   | scaffold_9_mRNA_2101.1           | C.usmhu_00122_mRNA_44.1     |                                 |
| GF0024515 | 1                             | 1                        | 0                            | Hypothetical protein (2)                                                     |                                                                                                                                                                                                                                                                                                                                                                                                 |                                                                                                                                                                                                                                                                                                                                                                                                                                                   | scaffold_9_mRNA_2100.1           | C.usmhu_00122_mRNA_45.1     |                                 |
| GF0024513 | 1                             | 1                        | 0                            | Hypothetical protein (2)                                                     | zinc ion binding [GO:0008270 molecular_function] (1); nucleic acid binding [GO:0003676 molecular_function] (1)                                                                                                                                                                                                                                                                                  | Zinc finger, CCHC-type [IPRO01878] (1)                                                                                                                                                                                                                                                                                                                                                                                                            | scaffold_9_mRNA_2093.1           | C.usmhu_00781_mRNA_17.1     |                                 |
| GF0024512 | 1                             | 1                        | 0                            | Hypothetical protein (2)                                                     | metal ion binding [GO:0046872 molecular_function] (2); metal ion transport [GO:0030001 biological_process] (2)                                                                                                                                                                                                                                                                                  | Heavy metal-associated domain, HMA [IPRO06121] (2)                                                                                                                                                                                                                                                                                                                                                                                                | scaffold_9_mRNA_209.1            | C.usmhu_00355_mRNA_20.1     |                                 |
| GF0024511 | 1                             | 1                        | 0                            | PR10 protein (2)                                                             | defense response [GO:0006952 biological_process] (2); response to biotic stimulus [GO:0009607 biological_process] (2)                                                                                                                                                                                                                                                                           | Bet v 1 type allergen [IPRO24949] (2); Bet v 1/Major latex protein [IPRO00916] (2); START-like domain [IPRO23393] (2); Major latex protein domain [IPRO24948] (1)                                                                                                                                                                                                                                                                                 | scaffold_9_mRNA_208.1            | C.usmhu_00355_mRNA_19.1     |                                 |
| GF0024510 | 1                             | 1                        | 0                            | Putative retroelement pol polyprotein (1); Hypothetical protein (1)          |                                                                                                                                                                                                                                                                                                                                                                                                 |                                                                                                                                                                                                                                                                                                                                                                                                                                                   | scaffold_9_mRNA_2079.1           | C.usmhu_01797_mRNA_1.1      |                                 |
| GF0024509 | 1                             | 1                        | 0                            | Hypothetical protein (2)                                                     |                                                                                                                                                                                                                                                                                                                                                                                                 |                                                                                                                                                                                                                                                                                                                                                                                                                                                   | scaffold_9_mRNA_2075.1           | C.usmhu_00268_mRNA_21.1     |                                 |
| GF0024508 | 1                             | 1                        | 0                            | Hypothetical protein (2)                                                     |                                                                                                                                                                                                                                                                                                                                                                                                 | Aspartic peptidase domain [IPRO21109] (1)                                                                                                                                                                                                                                                                                                                                                                                                         | scaffold_9_mRNA_2073.1           | C.usmhu_00268_mRNA_20.1     |                                 |
| GF0024507 | 1                             | 1                        | 0                            | Bet v 1 allergen (1); Hypothetical protein (1)                               | response to biotic stimulus [GO:0009607 biological_process] (1); defense response [GO:0006952 biological_process] (1)                                                                                                                                                                                                                                                                           | START-like domain [IPRO23393] (2); Bet v 1 type allergen [IPRO24949] (2); Bet v 1/Major latex protein [IPRO00916] (1)                                                                                                                                                                                                                                                                                                                             | scaffold_9_mRNA_207.1            | C.usmhu_00355_mRNA_18.1     |                                 |
| GF0024506 | 1                             | 1                        | 0                            | Hypothetical protein (2)                                                     |                                                                                                                                                                                                                                                                                                                                                                                                 |                                                                                                                                                                                                                                                                                                                                                                                                                                                   | scaffold_9_mRNA_2065.1           | C.usmhu_00268_mRNA_10.1     |                                 |
| GF0024505 | 1                             | 1                        | 0                            | 6a-hydroxymaackain methyltransferase family protein (2)                      | O-methyltransferase activity [GO:0008171 molecular_function] (2); protein dimerization activity [GO:0046983 molecular_function] (2); methyltransferase activity [GO:0008168 molecular_function] (2)                                                                                                                                                                                             | S-adenosyl-L-methionine-dependent methyltransferase [IPRO29063] (2); Plant methyltransferase dimerization [IPRO12967] (2); O-methyltransferase COMT-type [IPRO16461] (2); O-methyltransferase, family 2 [IPRO01077] (2); Winged helix-turn-helix DNA-binding domain [IPRO11991] (2)                                                                                                                                                               | scaffold_9_mRNA_2064.1           | C.usmhu_00268_mRNA_9.1      |                                 |
| GF0024504 | 1                             | 1                        | 0                            | Hypothetical protein (2)                                                     |                                                                                                                                                                                                                                                                                                                                                                                                 |                                                                                                                                                                                                                                                                                                                                                                                                                                                   | scaffold_9_mRNA_2062.1           | C.usmhu_00268_mRNA_7.1      |                                 |
| GF0024503 | 1                             | 1                        | 0                            | Hypothetical protein (2)                                                     | proteolysis [GO:0006508 biological_process] (1); cysteine-type peptidase activity [GO:0008234 molecular_function] (1)                                                                                                                                                                                                                                                                           | Domain of unknown function DUF4218 [IPRO25432] (2); Domain of unknown function DUF4216 [IPRO25312] (2); Ulp1 protease family, C-terminal catalytic domain [IPRO03653] (1)                                                                                                                                                                                                                                                                         | scaffold_9_mRNA_2052.1           | C.usmhu_00268_mRNA_2.1      |                                 |
| GF0024502 | 1                             | 1                        | 0                            | Fra 2 allergen (1); Major allergen Pru ar. putative (1)                      | response to biotic stimulus [GO:0009607 biological_process] (2); defense response [GO:0006952 biological_process] (2)                                                                                                                                                                                                                                                                           | Bet v 1 type allergen [IPRO24949] (2); Bet v 1/Major latex protein [IPRO00916] (2); START-like domain [IPRO23393] (2)                                                                                                                                                                                                                                                                                                                             | scaffold_9_mRNA_205.1            | C.usmhu_00355_mRNA_16.1     |                                 |
| GF0024501 | 1                             | 1                        | 0                            | Cytoskeleton ribosome 5' monophosphate phosphoribohydrolase (2)              |                                                                                                                                                                                                                                                                                                                                                                                                 | LOG family [IPRO31100] (2)                                                                                                                                                                                                                                                                                                                                                                                                                        | scaffold_9_mRNA_2045.1           | C.usmhu_00094_mRNA_38.1     |                                 |
| GF0024500 | 1                             | 1                        | 0                            | Hypothetical protein (2)                                                     |                                                                                                                                                                                                                                                                                                                                                                                                 |                                                                                                                                                                                                                                                                                                                                                                                                                                                   | scaffold_9_mRNA_2042.1           | C.usmhu_00094_mRNA_35.1     |                                 |
| GF0024499 | 1                             | 1                        | 0                            | UV radiation resistance-associated protein (2)                               |                                                                                                                                                                                                                                                                                                                                                                                                 |                                                                                                                                                                                                                                                                                                                                                                                                                                                   | scaffold_9_mRNA_2038.1           | C.usmhu_00094_mRNA_31.1     |                                 |
| GF0024498 | 1                             | 1                        | 0                            | Hypothetical protein (2)                                                     |                                                                                                                                                                                                                                                                                                                                                                                                 |                                                                                                                                                                                                                                                                                                                                                                                                                                                   | scaffold_9_mRNA_2037.1           | C.usmhu_00094_mRNA_30.1     |                                 |
| GF0024497 | 1                             | 1                        | 0                            | Hypothetical protein (2)                                                     |                                                                                                                                                                                                                                                                                                                                                                                                 |                                                                                                                                                                                                                                                                                                                                                                                                                                                   | scaffold_9_mRNA_2034.1           | C.usmhu_00094_mRNA_27.1     |                                 |
| GF0024496 | 1                             | 1                        | 0                            | Hypothetical protein (2)                                                     |                                                                                                                                                                                                                                                                                                                                                                                                 |                                                                                                                                                                                                                                                                                                                                                                                                                                                   | scaffold_9_mRNA_2030.1           | C.usmhu_00094_mRNA_24.1     |                                 |
| GF0024495 | 1                             | 1                        | 0                            | Putative ULM/C-like DNA repair family protein (2)                            |                                                                                                                                                                                                                                                                                                                                                                                                 |                                                                                                                                                                                                                                                                                                                                                                                                                                                   | scaffold_9_mRNA_2028.1           | C.usmhu_00094_mRNA_21.1     |                                 |
| GF0024494 | 1                             | 1                        | 0                            | Autophagy protein 5 (2)                                                      | autophagy [GO:0006914 biological_process] (2); cytoplasm [GO:0005737 cellular_component] (2); cytoplasm [GO:0005737 cellular_component] (2); autophagy [GO:0006914 biological_process] (2)                                                                                                                                                                                                      | Autophagy-related protein 5 [IPRO07239] (2)                                                                                                                                                                                                                                                                                                                                                                                                       | scaffold_9_mRNA_2027.1           | C.usmhu_00094_mRNA_20.1     |                                 |
| GF0024493 | 1                             | 1                        | 0                            | Hypothetical protein (2)                                                     |                                                                                                                                                                                                                                                                                                                                                                                                 |                                                                                                                                                                                                                                                                                                                                                                                                                                                   | scaffold_9_mRNA_2023.1           | C.usmhu_00094_mRNA_17.1     |                                 |
| GF0024492 | 1                             | 1                        | 0                            | Hypothetical protein (2)                                                     |                                                                                                                                                                                                                                                                                                                                                                                                 |                                                                                                                                                                                                                                                                                                                                                                                                                                                   | scaffold_9_mRNA_2016.1           | C.usmhu_00094_mRNA_7.1      |                                 |
| GF0024491 | 1                             | 1                        | 0                            | Hypothetical protein (2)                                                     |                                                                                                                                                                                                                                                                                                                                                                                                 |                                                                                                                                                                                                                                                                                                                                                                                                                                                   | scaffold_9_mRNA_2015.1           | C.usmhu_00094_mRNA_6.1      |                                 |
| GF0024490 | 1                             | 1                        | 0                            | Hypothetical protein (2)                                                     |                                                                                                                                                                                                                                                                                                                                                                                                 |                                                                                                                                                                                                                                                                                                                                                                                                                                                   | scaffold_9_mRNA_2012.1           | C.usmhu_00094_mRNA_2.1      |                                 |
| GF0024489 | 1                             | 1                        | 0                            | Hypothetical protein (2)                                                     |                                                                                                                                                                                                                                                                                                                                                                                                 |                                                                                                                                                                                                                                                                                                                                                                                                                                                   | scaffold_9_mRNA_2008.1           | C.usmhu_00679_mRNA_3.1      |                                 |
| GF0024488 | 1                             | 1                        | 0                            | Alkaline ceramidase 3 (2)                                                    | ceramide metabolic process [GO:0006672 biological_process] (2); hydrolase activity, acting on carbon-nitrogen (but not peptide) bonds, in linear amides [GO:0016811 molecular_function] (2); integral component of membrane [GO:0016021 cellular_component] (2)                                                                                                                                 | Ceramidase [IPRO08901] (2)                                                                                                                                                                                                                                                                                                                                                                                                                        | scaffold_9_mRNA_2006.1           | C.usmhu_00679_mRNA_5.1      |                                 |
| GF0024487 | 1                             | 1                        | 0                            | Hypothetical protein (2)                                                     |                                                                                                                                                                                                                                                                                                                                                                                                 |                                                                                                                                                                                                                                                                                                                                                                                                                                                   | scaffold_9_mRNA_2004.1           | C.usmhu_00679_mRNA_6.1      |                                 |
| GF0024486 | 1                             | 1                        | 0                            | Hypothetical protein (2)                                                     | proteolysis [GO:0006508 biological_process] (2); aspartic-type endopeptidase activity [GO:0004190 molecular_function] (2); nucleic acid binding [GO:0003676 molecular_function] (1); zinc ion binding [GO:0008270 molecular_function] (1)                                                                                                                                                       | Viral movement protein [IPRO28919] (2); Aspartic peptidase, active site [IPRO1090] (2); Aspartic peptidase domain [IPRO21109] (1); Zinc finger, CCHC-type [IPRO01878] (1)                                                                                                                                                                                                                                                                         | scaffold_9_mRNA_2002.1           | C.usmhu_00679_mRNA_9.1      |                                 |
| GF0024485 | 1                             | 1                        | 0                            | Hypothetical protein (2)                                                     |                                                                                                                                                                                                                                                                                                                                                                                                 |                                                                                                                                                                                                                                                                                                                                                                                                                                                   | scaffold_9_mRNA_2.1              | C.usmhu_00230_mRNA_30.1     |                                 |
| GF0024483 | 1                             | 1                        | 0                            | Major allergen Mal d 1 (2)                                                   | defense response [GO:0006952 biological_process] (2); response to biotic stimulus [GO:0009607 biological_process] (2)                                                                                                                                                                                                                                                                           | Bet v 1/Major latex protein [IPRO00916] (2); START-like domain [IPRO23393] (2); Bet v 1 type allergen [IPRO24949] (2); Major latex protein domain [IPRO24948] (1)                                                                                                                                                                                                                                                                                 | scaffold_9_mRNA_198.1            | C.usmhu_00355_mRNA_11.1     |                                 |
| GF0024481 | 1                             | 1                        | 0                            | Hypothetical protein (2)                                                     |                                                                                                                                                                                                                                                                                                                                                                                                 |                                                                                                                                                                                                                                                                                                                                                                                                                                                   | scaffold_9_mRNA_1971.1           | C.usmhu_00393_mRNA_16.1     |                                 |
| GF0024480 | 1                             | 1                        | 0                            | Hypothetical protein (2)                                                     |                                                                                                                                                                                                                                                                                                                                                                                                 |                                                                                                                                                                                                                                                                                                                                                                                                                                                   | scaffold_9_mRNA_1951.1           | C.usmhu_00015_mRNA_12.1     |                                 |
| GF0024479 | 1                             | 1                        | 0                            | Hypothetical protein (2)                                                     |                                                                                                                                                                                                                                                                                                                                                                                                 | Transposase-associated domain [IPRO29480] (2)                                                                                                                                                                                                                                                                                                                                                                                                     | scaffold_9_mRNA_195.1            | C.usmhu_00355_mRNA_9.1      |                                 |
| GF0024476 | 1                             | 1                        | 0                            | Hypothetical protein (2)                                                     | hydrolase activity [GO:0016787 molecular_function] (2)                                                                                                                                                                                                                                                                                                                                          | Iron-zinc-purple acid phosphatase-like C-terminal domain [IPRO25733] (2); Metallo-dependent phosphatase-like [IPRO29052] (2); Calcineurin-like phosphoesterase domain, Apaf1 type [IPRO04843] (1); Calcineurin-like phosphoesterase domain, Apaf1 type [IPRO04843] (1)                                                                                                                                                                            | scaffold_9_mRNA_1936.1           | C.usmhu_00567_mRNA_1.1      |                                 |
| GF0024475 | 1                             | 1                        | 0                            | Hypothetical protein (1); BED zinc finger/hAT family dimerization domain (1) | DNA binding [GO:0003677 molecular_function] (2); nucleic acid binding [GO:0003676 molecular_function] (1); protein dimerization activity [GO:0046983 molecular_function] (1); nucleic acid binding [GO:0003676 molecular_function] (1)                                                                                                                                                          | hAT-like transposase, RNase-H fold [IPRO25525] (2); HAT, C-terminal dimerization domain [IPRO08906] (1); Ribonuclease H-like domain [IPRO12337] (1)                                                                                                                                                                                                                                                                                               | scaffold_9_mRNA_1931.1           | C.usmhu_00567_mRNA_7.1      |                                 |
| GF0024474 | 1                             | 1                        | 0                            | Hypothetical protein (2)                                                     |                                                                                                                                                                                                                                                                                                                                                                                                 |                                                                                                                                                                                                                                                                                                                                                                                                                                                   | scaffold_9_mRNA_1925.1           | C.usmhu_00567_mRNA_13.1     |                                 |
| GF0024473 | 1                             | 1                        | 0                            | Hypothetical protein (2)                                                     |                                                                                                                                                                                                                                                                                                                                                                                                 |                                                                                                                                                                                                                                                                                                                                                                                                                                                   | scaffold_9_mRNA_1918.1           | C.usmhu_00170_mRNA_21.1     |                                 |
| GF0024471 | 1                             | 1                        | 0                            | Hypothetical protein (2)                                                     |                                                                                                                                                                                                                                                                                                                                                                                                 |                                                                                                                                                                                                                                                                                                                                                                                                                                                   | scaffold_9_mRNA_1898.1           | C.usmhu_00057_mRNA_65.1     |                                 |
| GF0024470 | 1                             | 1                        | 0                            | Hypothetical protein (2)                                                     |                                                                                                                                                                                                                                                                                                                                                                                                 |                                                                                                                                                                                                                                                                                                                                                                                                                                                   | scaffold_9_mRNA_1896.1           | C.usmhu_00057_mRNA_63.1     |                                 |
| GF0024469 | 1                             | 1                        | 0                            | DUF247 domain protein (2)                                                    |                                                                                                                                                                                                                                                                                                                                                                                                 | Protein of unknown function DUF247, plant [IPRO04158] (2)                                                                                                                                                                                                                                                                                                                                                                                         | scaffold_9_mRNA_1892.1           | C.usmhu_00701_mRNA_3.1      |                                 |
| GF0024468 | 1                             | 1                        | 0                            | Hypothetical protein (2)                                                     |                                                                                                                                                                                                                                                                                                                                                                                                 |                                                                                                                                                                                                                                                                                                                                                                                                                                                   | scaffold_9_mRNA_1890.1           | C.usmhu_00701_mRNA_5.1      |                                 |
| GF0024467 | 1                             | 1                        | 0                            | Hypothetical protein (2)                                                     |                                                                                                                                                                                                                                                                                                                                                                                                 |                                                                                                                                                                                                                                                                                                                                                                                                                                                   | scaffold_9_mRNA_1889.1           | C.usmhu_00701_mRNA_6.1      |                                 |
| GF0024466 | 1                             | 1                        | 0                            | UPO0481 protein (2)                                                          |                                                                                                                                                                                                                                                                                                                                                                                                 | Protein of unknown function DUF247, plant [IPRO04158] (2)                                                                                                                                                                                                                                                                                                                                                                                         | scaffold_9_mRNA_1887.1           | C.usmhu_02148_mRNA_5.1      |                                 |
| GF0024465 | 1                             | 1                        | 0                            | Hypothetical protein (2)                                                     |                                                                                                                                                                                                                                                                                                                                                                                                 |                                                                                                                                                                                                                                                                                                                                                                                                                                                   | scaffold_9_mRNA_1886.1           | C.usmhu_02148_mRNA_4.1      |                                 |
| GF0024464 | 1                             | 1                        | 0                            | Hypothetical protein (2)                                                     | nucleic acid binding [GO:0003676 molecular_function] (1)                                                                                                                                                                                                                                                                                                                                        | Ribonuclease H-like domain [IPRO12337] (1)                                                                                                                                                                                                                                                                                                                                                                                                        | scaffold_9_mRNA_1885.1           | C.usmhu_02148_mRNA_3.1      |                                 |
| GF0024463 | 1                             | 1                        | 0                            | Hypothetical protein (2)                                                     |                                                                                                                                                                                                                                                                                                                                                                                                 |                                                                                                                                                                                                                                                                                                                                                                                                                                                   | scaffold_9_mRNA_1884.1           | C.usmhu_02148_mRNA_2.1      |                                 |
| GF0024462 | 1                             | 1                        | 0                            | Hypothetical protein (2)                                                     |                                                                                                                                                                                                                                                                                                                                                                                                 | Retroviral transposon gag domain [IPRO05162] (2)                                                                                                                                                                                                                                                                                                                                                                                                  | scaffold_9_mRNA_1881.1           | C.usmhu_00287_mRNA_13.1     |                                 |
| GF0024461 | 1                             | 1                        | 0                            | Hypothetical protein (2)                                                     |                                                                                                                                                                                                                                                                                                                                                                                                 | Aspartic peptidase domain [IPRO21109] (1)                                                                                                                                                                                                                                                                                                                                                                                                         | scaffold_9_mRNA_1880.1           | C.usmhu_00287_mRNA_12.1     |                                 |

| ID        | Num in <i>C. celenense</i> | Num in <i>C. acutis</i> | Num in <i>P. trifoliata</i> | Note                                                                                    | GO                                                                                                                                                                                                                                                                                                                                                                                                                                                      | InterPro                                                                                                                                                                                                                                                                                                        | Members in <i>C. celenense</i> | Members in <i>C. acutis</i> | Members in <i>P. trifoliata</i> |
|-----------|----------------------------|-------------------------|-----------------------------|-----------------------------------------------------------------------------------------|---------------------------------------------------------------------------------------------------------------------------------------------------------------------------------------------------------------------------------------------------------------------------------------------------------------------------------------------------------------------------------------------------------------------------------------------------------|-----------------------------------------------------------------------------------------------------------------------------------------------------------------------------------------------------------------------------------------------------------------------------------------------------------------|--------------------------------|-----------------------------|---------------------------------|
| GF0024460 | 1                          | 1                       | 0                           | Hypothetical protein (2)                                                                | nucleic acid binding [GO:0003676]<br>molecular_function (2)                                                                                                                                                                                                                                                                                                                                                                                             | Ribonuclease H-like domain [IPRO12337] (2); Reverse transcriptase zinc-binding domain [IPRO26960] (2); Endonuclease/exonuclease/phosphatase [IPRO05135] (2)                                                                                                                                                     | scaffold_9_mRNA_1864.1         | C_unshiu_00124_mRNA_27.1    | -                               |
| GF0024459 | 1                          | 1                       | 0                           | Hypothetical protein (2)                                                                |                                                                                                                                                                                                                                                                                                                                                                                                                                                         |                                                                                                                                                                                                                                                                                                                 | scaffold_9_mRNA_1862.1         | C_unshiu_00124_mRNA_25.1    | -                               |
| GF0024457 | 1                          | 1                       | 0                           | Two-component response regulator ARR12-like protein (2)                                 | DNA binding [GO:0003677]<br>molecular_function (2); phosphorylation signal transduction system [GO:0000160]<br>biological_process (2)                                                                                                                                                                                                                                                                                                                   | HAT, C-terminal dimerization domain [IPRO08906] (2); Zinc finger, BED-type [IPRO03656] (2); Ribonuclease H-like domain [IPRO12337] (2); Zinc finger C2H2-type [IPRO13087] (1)                                                                                                                                   | scaffold_9_mRNA_186.1          | C_unshiu_00007_mRNA_2.1     | -                               |
| GF0024456 | 1                          | 1                       | 0                           | Hypothetical protein (2)                                                                |                                                                                                                                                                                                                                                                                                                                                                                                                                                         |                                                                                                                                                                                                                                                                                                                 | scaffold_9_mRNA_1858.1         | C_unshiu_00480_mRNA_4.1     | -                               |
| GF0024455 | 1                          | 1                       | 0                           | Hypothetical protein (2)                                                                |                                                                                                                                                                                                                                                                                                                                                                                                                                                         |                                                                                                                                                                                                                                                                                                                 | scaffold_9_mRNA_1849.1         | C_unshiu_00351_mRNA_17.1    | -                               |
| GF0024454 | 1                          | 1                       | 0                           | Hypothetical protein (2)                                                                |                                                                                                                                                                                                                                                                                                                                                                                                                                                         |                                                                                                                                                                                                                                                                                                                 | scaffold_9_mRNA_1847.1         | C_unshiu_00351_mRNA_16.1    | -                               |
| GF0024452 | 1                          | 1                       | 0                           | Hypothetical protein (2)                                                                |                                                                                                                                                                                                                                                                                                                                                                                                                                                         |                                                                                                                                                                                                                                                                                                                 | scaffold_9_mRNA_1843.1         | C_unshiu_00351_mRNA_13.1    | -                               |
| GF0024451 | 1                          | 1                       | 0                           | Hypothetical protein (2)                                                                |                                                                                                                                                                                                                                                                                                                                                                                                                                                         |                                                                                                                                                                                                                                                                                                                 | scaffold_9_mRNA_1838.1         | C_unshiu_00015_mRNA_3.1     | -                               |
| GF0024449 | 1                          | 1                       | 0                           | Hypothetical protein (2)                                                                |                                                                                                                                                                                                                                                                                                                                                                                                                                                         |                                                                                                                                                                                                                                                                                                                 | scaffold_9_mRNA_1832.1         | C_unshiu_01152_mRNA_5.1     | -                               |
| GF0024448 | 1                          | 1                       | 0                           | Cytoskinin riboside 5'-monophosphate phosphoribitolhydroxylase (2)                      |                                                                                                                                                                                                                                                                                                                                                                                                                                                         |                                                                                                                                                                                                                                                                                                                 | scaffold_9_mRNA_1822.1         | C_unshiu_01121_mRNA_7.1     | -                               |
| GF0024447 | 1                          | 1                       | 0                           | Leukocyte receptor cluster member 1 (2)                                                 |                                                                                                                                                                                                                                                                                                                                                                                                                                                         |                                                                                                                                                                                                                                                                                                                 | scaffold_9_mRNA_1815.1         | C_unshiu_00323_mRNA_6.1     | -                               |
| GF0024446 | 1                          | 1                       | 0                           | Hypothetical protein (2)                                                                |                                                                                                                                                                                                                                                                                                                                                                                                                                                         |                                                                                                                                                                                                                                                                                                                 | scaffold_9_mRNA_1813.1         | C_unshiu_01046_mRNA_3.1     | -                               |
| GF0024445 | 1                          | 1                       | 0                           | Hypothetical protein (2)                                                                |                                                                                                                                                                                                                                                                                                                                                                                                                                                         |                                                                                                                                                                                                                                                                                                                 | scaffold_9_mRNA_1808.1         | C_unshiu_01596_mRNA_2.1     | -                               |
| GF0024444 | 1                          | 1                       | 0                           | Hypothetical protein (2)                                                                |                                                                                                                                                                                                                                                                                                                                                                                                                                                         |                                                                                                                                                                                                                                                                                                                 | scaffold_9_mRNA_1807.1         | C_unshiu_01596_mRNA_1.1     | -                               |
| GF0024443 | 1                          | 1                       | 0                           | Putative AC transposase (2)                                                             | DNA binding [GO:0003677]<br>molecular_function (2); protein dimerization activity [GO:0040693]<br>molecular_function (2); nucleic acid binding [GO:0003676]<br>molecular_function (2)                                                                                                                                                                                                                                                                   | HAT, C-terminal dimerization domain [IPRO08906] (2); Zinc finger, BED-type [IPRO03656] (2); Ribonuclease H-like domain [IPRO12337] (2); Zinc finger C2H2-type [IPRO13087] (1)                                                                                                                                   | scaffold_9_mRNA_1806.1         | C_unshiu_00645_mRNA_13.1    | -                               |
| GF0024442 | 1                          | 1                       | 0                           | Hypothetical protein (2)                                                                |                                                                                                                                                                                                                                                                                                                                                                                                                                                         |                                                                                                                                                                                                                                                                                                                 | scaffold_9_mRNA_1805.1         | C_unshiu_00645_mRNA_14.1    | -                               |
| GF0024441 | 1                          | 1                       | 0                           | Hypothetical protein (2)                                                                | nucleic acid binding [GO:0003676]<br>molecular_function (2)                                                                                                                                                                                                                                                                                                                                                                                             | Ribonuclease H-like domain [IPRO12337] (2)                                                                                                                                                                                                                                                                      | scaffold_9_mRNA_1789.1         | C_unshiu_00506_mRNA_13.1    | -                               |
| GF0024440 | 1                          | 1                       | 0                           | Hypothetical protein (2)                                                                | protein binding [GO:0005515]<br>molecular_function (1)                                                                                                                                                                                                                                                                                                                                                                                                  | Transposase-associated domain [IPRO29480] (2); WD40 YVTN repeat-like-containing domain [IPRO15943] (1); WD40-repeat-containing domain [IPRO17986] (1)                                                                                                                                                           | scaffold_9_mRNA_1788.1         | C_unshiu_00506_mRNA_12.1    | -                               |
| GF0024439 | 1                          | 1                       | 0                           | Hypothetical protein (2)                                                                |                                                                                                                                                                                                                                                                                                                                                                                                                                                         |                                                                                                                                                                                                                                                                                                                 | scaffold_9_mRNA_1782.1         | C_unshiu_00920_mRNA_3.1     | -                               |
| GF0024438 | 1                          | 1                       | 0                           | Hypothetical protein (2)                                                                |                                                                                                                                                                                                                                                                                                                                                                                                                                                         |                                                                                                                                                                                                                                                                                                                 | scaffold_9_mRNA_1781.1         | C_unshiu_00920_mRNA_2.1     | -                               |
| GF0024437 | 1                          | 1                       | 0                           | Hypothetical protein (2)                                                                |                                                                                                                                                                                                                                                                                                                                                                                                                                                         |                                                                                                                                                                                                                                                                                                                 | scaffold_9_mRNA_1780.1         | C_unshiu_00351_mRNA_11.1    | -                               |
| GF0024436 | 1                          | 1                       | 0                           | Hypothetical protein (2)                                                                |                                                                                                                                                                                                                                                                                                                                                                                                                                                         |                                                                                                                                                                                                                                                                                                                 | scaffold_9_mRNA_1779.1         | C_unshiu_00920_mRNA_1.1     | -                               |
| GF0024435 | 1                          | 1                       | 0                           | Hypothetical protein (2)                                                                |                                                                                                                                                                                                                                                                                                                                                                                                                                                         |                                                                                                                                                                                                                                                                                                                 | scaffold_9_mRNA_1778.1         | C_unshiu_00011_mRNA_1.1     | -                               |
| GF0024434 | 1                          | 1                       | 0                           | Hypothetical protein (2)                                                                |                                                                                                                                                                                                                                                                                                                                                                                                                                                         |                                                                                                                                                                                                                                                                                                                 | scaffold_9_mRNA_1775.1         | C_unshiu_00501_mRNA_5.1     | -                               |
| GF0024433 | 1                          | 1                       | 0                           | Hypothetical protein (2)                                                                |                                                                                                                                                                                                                                                                                                                                                                                                                                                         |                                                                                                                                                                                                                                                                                                                 | scaffold_9_mRNA_1770.1         | C_unshiu_00662_mRNA_40.1    | -                               |
| GF0024432 | 1                          | 1                       | 0                           | Hypothetical protein (2)                                                                |                                                                                                                                                                                                                                                                                                                                                                                                                                                         |                                                                                                                                                                                                                                                                                                                 | scaffold_9_mRNA_1768.1         | C_unshiu_01039_mRNA_2.1     | -                               |
| GF0024431 | 1                          | 1                       | 0                           | Hypothetical protein (2)                                                                |                                                                                                                                                                                                                                                                                                                                                                                                                                                         |                                                                                                                                                                                                                                                                                                                 | scaffold_9_mRNA_1765.1         | C_unshiu_00309_mRNA_17.1    | -                               |
| GF0024430 | 1                          | 1                       | 0                           | Hypothetical protein (2)                                                                |                                                                                                                                                                                                                                                                                                                                                                                                                                                         |                                                                                                                                                                                                                                                                                                                 | scaffold_9_mRNA_1752.1         | C_unshiu_02379_mRNA_1.1     | -                               |
| GF0024429 | 1                          | 1                       | 0                           | Transcription factor MYB12 (2)                                                          | DNA binding [GO:0003677]<br>molecular_function (2)                                                                                                                                                                                                                                                                                                                                                                                                      | SANT/Myb domain [IPRO01005] (2); Myb domain [IPRO17930] (2); Homeobox domain-like [IPRO09057] (1); Homeobox domain-like [IPRO09057] (1)                                                                                                                                                                         | scaffold_9_mRNA_175.1          | C_unshiu_00007_mRNA_13.1    | -                               |
| GF0024428 | 1                          | 1                       | 0                           | Hypothetical protein (2)                                                                | regulation of transcription, DNA-templated [GO:0006355]<br>biological_process (2)                                                                                                                                                                                                                                                                                                                                                                       | FAR1 DNA binding domain [IPRO04310] (2); FHY3/FAR1 family [IPRO31052] (2)                                                                                                                                                                                                                                       | scaffold_9_mRNA_1743.1         | C_unshiu_00424_mRNA_10.1    | -                               |
| GF0024427 | 1                          | 1                       | 0                           | Transposon protein, putative, unclassified (1); Protein FAR-RED IMPAIRED RESPONSE 1 (1) | regulation of transcription, DNA-templated [GO:0006355]<br>biological_process (2); zinc ion binding [GO:0008270]<br>molecular_function (2)                                                                                                                                                                                                                                                                                                              | FHY3/FAR1 family [IPRO31052] (2); Zinc finger, SWIM-type domain [IPRO07527] (2); MULE transposase domain [IPRO18289] (2)                                                                                                                                                                                        | scaffold_9_mRNA_1742.1         | C_unshiu_00424_mRNA_9.1     | -                               |
| GF0024426 | 1                          | 1                       | 0                           | Hypothetical protein (2)                                                                |                                                                                                                                                                                                                                                                                                                                                                                                                                                         |                                                                                                                                                                                                                                                                                                                 | scaffold_9_mRNA_1740.1         | C_unshiu_00424_mRNA_7.1     | -                               |
| GF0024425 | 1                          | 1                       | 0                           | Hypothetical protein (2)                                                                |                                                                                                                                                                                                                                                                                                                                                                                                                                                         |                                                                                                                                                                                                                                                                                                                 | scaffold_9_mRNA_1738.1         | C_unshiu_00424_mRNA_5.1     | -                               |
| GF0024423 | 1                          | 1                       | 0                           | Hypothetical protein (2)                                                                |                                                                                                                                                                                                                                                                                                                                                                                                                                                         |                                                                                                                                                                                                                                                                                                                 | scaffold_9_mRNA_1732.1         | C_unshiu_01199_mRNA_3.1     | -                               |
| GF0024422 | 1                          | 1                       | 0                           | Hypothetical protein (2)                                                                |                                                                                                                                                                                                                                                                                                                                                                                                                                                         |                                                                                                                                                                                                                                                                                                                 | scaffold_9_mRNA_1721.1         | C_unshiu_00620_mRNA_10.1    | -                               |
| GF0024421 | 1                          | 1                       | 0                           | Hypothetical protein (1); Ethylene-responsive transcription factor ERF114 (1)           | DNA binding [GO:0003677]<br>molecular_function (1); transcription factor activity, sequence-specific DNA binding [GO:0003700]<br>molecular_function (1); regulation of transcription, DNA-templated [GO:0006355]<br>biological_process (1)                                                                                                                                                                                                              | DNA binding domain [IPRO16177] (1); AP2/ERF domain [IPRO01471] (1)                                                                                                                                                                                                                                              | scaffold_9_mRNA_1720.1         | C_unshiu_00620_mRNA_11.2    | -                               |
| GF0024420 | 1                          | 1                       | 0                           | Hypothetical protein (2)                                                                |                                                                                                                                                                                                                                                                                                                                                                                                                                                         |                                                                                                                                                                                                                                                                                                                 | scaffold_9_mRNA_1714.1         | C_unshiu_00063_mRNA_6.1     | -                               |
| GF0024419 | 1                          | 1                       | 0                           | Hypothetical protein (2)                                                                |                                                                                                                                                                                                                                                                                                                                                                                                                                                         |                                                                                                                                                                                                                                                                                                                 | scaffold_9_mRNA_171.1          | C_unshiu_00007_mRNA_18.1    | -                               |
| GF0024418 | 1                          | 1                       | 0                           | Hypothetical protein (2)                                                                |                                                                                                                                                                                                                                                                                                                                                                                                                                                         |                                                                                                                                                                                                                                                                                                                 | scaffold_9_mRNA_1709.1         | C_unshiu_00211_mRNA_1.1     | -                               |
| GF0024417 | 1                          | 1                       | 0                           | 60S ribosomal protein L30 (2)                                                           | ribosome [GO:0005840]<br>cellular_component (2); intracellular [GO:0005622]<br>cellular_component (2); translation [GO:0006412]<br>biological_process (2); structural constituent of ribosome [GO:0003735]<br>molecular_function (2)                                                                                                                                                                                                                    | Ribosomal protein L30e, conserved site [IPRO22991] (2); Ribosomal protein L7AeL30eS12eGadd45 [IPRO04038] (2); 50S ribosomal protein L30e-like [IPRO29046] (2); Ribosomal protein L30e [IPRO00231] (2)                                                                                                           | scaffold_9_mRNA_1708.1         | C_unshiu_00211_mRNA_2.1     | -                               |
| GF0024416 | 1                          | 1                       | 0                           | Putative non-ATP reverse transcriptase (1); Hypothetical protein (1)                    | nucleic acid binding [GO:0003676]<br>molecular_function (2)                                                                                                                                                                                                                                                                                                                                                                                             | Reverse transcriptase zinc-binding domain [IPRO26960] (2); Ribonuclease H-like domain [IPRO12337] (2); Domain of unknown function DUF4283 [IPRO25558] (1)                                                                                                                                                       | scaffold_9_mRNA_1704.1         | C_unshiu_00211_mRNA_9.1     | -                               |
| GF0024415 | 1                          | 1                       | 0                           | TMV resistance protein N (2)                                                            | ADP binding [GO:0043531]<br>molecular_function (2); signal transduction [GO:0007165]<br>biological_process (1); protein binding [GO:0005515]<br>molecular_function (1)                                                                                                                                                                                                                                                                                  | P-loop containing nucleoside triphosphate hydrolase [IPRO27417] (2); NB-ARC [IPRO2182] (2); Leucine-rich repeat 3 [IPRO11713] (2); Leucine-rich repeat domain, L domain-like [IPRO32675] (2); Toll/interleukin-1 receptor homology (TR) domain [IPRO00157] (1)                                                  | scaffold_9_mRNA_1701.1         | C_unshiu_00211_mRNA_13.1    | -                               |
| GF0024414 | 1                          | 1                       | 0                           | Hypothetical protein (2)                                                                |                                                                                                                                                                                                                                                                                                                                                                                                                                                         |                                                                                                                                                                                                                                                                                                                 | scaffold_9_mRNA_1699.1         | C_unshiu_00211_mRNA_15.1    | -                               |
| GF0024413 | 1                          | 1                       | 0                           | Hypothetical protein (2)                                                                | nucleic acid binding [GO:0003676]<br>molecular_function (1)                                                                                                                                                                                                                                                                                                                                                                                             | Reverse transcriptase zinc-binding domain [IPRO26960] (2)                                                                                                                                                                                                                                                       | scaffold_9_mRNA_1698.1         | C_unshiu_00211_mRNA_16.1    | -                               |
| GF0024410 | 1                          | 1                       | 0                           | E3 ubiquitin-protein ligase (2)                                                         | nucleic acid binding [GO:0003676]<br>molecular_function (2); zinc ion binding [GO:0008270]<br>molecular_function (2)                                                                                                                                                                                                                                                                                                                                    | Zinc finger, RING FYVE/PHD-type [IPRO13083] (2); Seven-in-absentia protein, TRAF-like domain [IPRO18121] (2); TRAF-like [IPRO08974] (2); Zinc finger, SIAH-type [IPRO13010] (2); E3 ubiquitin-protein ligase SIN-like [IPRO04162] (2); Zinc finger, RING-type [IPRO01841] (2); SIAH-type domain [IPRO13323] (1) | scaffold_9_mRNA_1671.1         | C_unshiu_00294_mRNA_14.1    | -                               |
| GF0024409 | 1                          | 1                       | 0                           | Hypothetical protein (2)                                                                | nucleic acid binding [GO:0003676]<br>molecular_function (2); zinc ion binding [GO:0008270]<br>molecular_function (2)                                                                                                                                                                                                                                                                                                                                    | Domain of unknown function DUF4283 [IPRO25558] (2); Zinc knuckle CX2CX4HX4C [IPRO25836] (2); Zinc finger, CCHC-type [IPRO01878] (2)                                                                                                                                                                             | scaffold_9_mRNA_1661.1         | C_unshiu_00294_mRNA_7.1     | -                               |
| GF0024407 | 1                          | 1                       | 0                           | Hypothetical protein (2)                                                                |                                                                                                                                                                                                                                                                                                                                                                                                                                                         |                                                                                                                                                                                                                                                                                                                 | scaffold_9_mRNA_1640.1         | C_unshiu_00603_mRNA_8.1     | -                               |
| GF0024406 | 1                          | 1                       | 0                           | Hypothetical protein (2)                                                                |                                                                                                                                                                                                                                                                                                                                                                                                                                                         |                                                                                                                                                                                                                                                                                                                 | scaffold_9_mRNA_1638.1         | C_unshiu_00603_mRNA_6.1     | -                               |
| GF0024403 | 1                          | 1                       | 0                           | Hypothetical protein (2)                                                                |                                                                                                                                                                                                                                                                                                                                                                                                                                                         |                                                                                                                                                                                                                                                                                                                 | scaffold_9_mRNA_1631.1         | C_unshiu_02459_mRNA_1.1     | -                               |
| GF0024402 | 1                          | 1                       | 0                           | Hypothetical protein (2)                                                                |                                                                                                                                                                                                                                                                                                                                                                                                                                                         |                                                                                                                                                                                                                                                                                                                 | scaffold_9_mRNA_1629.1         | C_unshiu_00354_mRNA_21.1    | -                               |
| GF0024400 | 1                          | 1                       | 0                           | Putative amidohydrolyase ytcJ (2)                                                       | hydrolase activity, acting on carbon-nitrogen (but not peptide) bonds [GO:0016810]<br>molecular_function (2)                                                                                                                                                                                                                                                                                                                                            | Metal-dependent hydrolase, composite domain [IPRO11059] (2); Amidohydrolyase 3 [IPRO31108] (2); Metal-dependent hydrolase [IPRO32466] (2); YtcJ like [IPRO33932] (1)                                                                                                                                            | scaffold_9_mRNA_1616.1         | C_unshiu_00952_mRNA_1.1     | -                               |
| GF0024399 | 1                          | 1                       | 0                           | Hypothetical protein (2)                                                                | GTPase activity [GO:0003924]<br>molecular_function (2); signal recognition particle receptor complex [GO:0007875]<br>cellular_component (2); intracellular protein transport [GO:0006886]<br>biological_process (2); GTP binding [GO:0005225]<br>molecular_function (2); signal recognition particle binding [GO:0005047]<br>molecular_function (2); SRP-dependent cotranslational protein targeting to membrane [GO:0006614]<br>biological_process (1) | Signal recognition particle receptor, alpha subunit, N-terminal [IPRO07222] (2); Signal recognition particle, SRP54 subunit, helical bundle [IPRO13822] (1)                                                                                                                                                     | scaffold_9_mRNA_1612.1         | C_unshiu_00512_mRNA_13.1    | -                               |









| ID        | Num. in <i>C. clementiae</i> | Num. in <i>C. ustinii</i> | Num. in <i>P. trifoliate</i> | Note                                                         | GO                                                                                                                                                                                                                                                                                                                                                                                                                                                                                                                                       | InterPro                                                                                                                                                                                                                                                                                                                                                                                                                                                         | Members in <i>C. clementiae</i> | Members in <i>C. ustinii</i> | Members in <i>P. trifoliate</i> |
|-----------|------------------------------|---------------------------|------------------------------|--------------------------------------------------------------|------------------------------------------------------------------------------------------------------------------------------------------------------------------------------------------------------------------------------------------------------------------------------------------------------------------------------------------------------------------------------------------------------------------------------------------------------------------------------------------------------------------------------------------|------------------------------------------------------------------------------------------------------------------------------------------------------------------------------------------------------------------------------------------------------------------------------------------------------------------------------------------------------------------------------------------------------------------------------------------------------------------|---------------------------------|------------------------------|---------------------------------|
| GF0024190 | 1                            | 1                         | 0                            | Hypothetical protein (2)                                     |                                                                                                                                                                                                                                                                                                                                                                                                                                                                                                                                          |                                                                                                                                                                                                                                                                                                                                                                                                                                                                  | scaffold_8_mRNA_476.1           | C_uustinii_00827_mRNA_16.1   | -                               |
| GF0024188 | 1                            | 1                         | 0                            | Hypothetical protein (2)                                     |                                                                                                                                                                                                                                                                                                                                                                                                                                                                                                                                          |                                                                                                                                                                                                                                                                                                                                                                                                                                                                  | scaffold_8_mRNA_469.1           | C_uustinii_00152_mRNA_4.1    | -                               |
| GF0024187 | 1                            | 1                         | 0                            | Putative nuclease HARB11 (2)                                 |                                                                                                                                                                                                                                                                                                                                                                                                                                                                                                                                          |                                                                                                                                                                                                                                                                                                                                                                                                                                                                  | scaffold_8_mRNA_463.1           | C_uustinii_00152_mRNA_10.1   | -                               |
| GF0024185 | 1                            | 1                         | 0                            | Pentatricopeptide (PPR) repeat protein (2)                   | protein binding [GO:0005515]<br>molecular_function (1)                                                                                                                                                                                                                                                                                                                                                                                                                                                                                   |                                                                                                                                                                                                                                                                                                                                                                                                                                                                  | scaffold_8_mRNA_451.1           | C_uustinii_00152_mRNA_23.1   | -                               |
| GF0024182 | 1                            | 1                         | 0                            | Cyclin D (2)                                                 | nucleus [GO:0005634]<br>cellular_component (2)                                                                                                                                                                                                                                                                                                                                                                                                                                                                                           |                                                                                                                                                                                                                                                                                                                                                                                                                                                                  | scaffold_8_mRNA_436.1           | C_uustinii_00152_mRNA_35.1   | -                               |
| GF0024180 | 1                            | 1                         | 0                            | Phosphoglycerate dehydrogenase (2)                           | metabolic process [GO:0008152]<br>biological_process (2); L-serine biosynthetic process [GO:0006564]<br>biological_process (2); amino acid binding [GO:0016597]<br>molecular_function (2);<br>phosphoglycerate dehydrogenase activity [GO:0004617]<br>molecular_function (2);<br>oxidation-reduction process [GO:0055114]<br>biological_process (2);<br>oxidoreductase activity, acting on the CH-OH group of donors, NAD or NADP as acceptor [GO:0016616]<br>molecular_function (2); NAD binding [GO:0051287]<br>molecular_function (2) |                                                                                                                                                                                                                                                                                                                                                                                                                                                                  | scaffold_8_mRNA_421.1           | C_uustinii_00152_mRNA_44.1   | -                               |
| GF0024179 | 1                            | 1                         | 0                            | Hypothetical protein (2)                                     |                                                                                                                                                                                                                                                                                                                                                                                                                                                                                                                                          |                                                                                                                                                                                                                                                                                                                                                                                                                                                                  | scaffold_8_mRNA_408.1           | C_uustinii_00152_mRNA_56.1   | -                               |
| GF0024176 | 1                            | 1                         | 0                            | RNA polymerase-associated protein RFP1 like (2)              | transcription elongation from RNA polymerase II promoter [GO:0006368]<br>biological_process (2); histone modification [GO:0016570]<br>biological_process (2); Cdc73/Paf1 complex [GO:0016593]<br>cellular_component (2); DNA binding [GO:0003677]<br>molecular_function (2);<br>DNA-templated transcription, initiation [GO:0006552]<br>biological_process (1);<br>nucleus [GO:0005634]<br>cellular_component (1)                                                                                                                        | Plus-3 domain [IPR004343] (2); RNA polymerase-associated protein Rpf1 [IPR01312] (2); Plus-3 domain, subgroup [IPR018144] (1)                                                                                                                                                                                                                                                                                                                                    | scaffold_8_mRNA_391.1           | C_uustinii_00363_mRNA_19.1   | -                               |
| GF0024175 | 1                            | 1                         | 0                            | F-box protein interaction domain protein (2)                 | protein binding [GO:0005515]<br>molecular_function (2)                                                                                                                                                                                                                                                                                                                                                                                                                                                                                   |                                                                                                                                                                                                                                                                                                                                                                                                                                                                  | scaffold_8_mRNA_388.1           | C_uustinii_00363_mRNA_19.1   | -                               |
| GF0024174 | 1                            | 1                         | 0                            | Carboxy-terminal domain cyclin (2)                           | nucleus [GO:0005634]<br>cellular_component (2)                                                                                                                                                                                                                                                                                                                                                                                                                                                                                           |                                                                                                                                                                                                                                                                                                                                                                                                                                                                  | scaffold_8_mRNA_378.1           | C_uustinii_00363_mRNA_30.1   | -                               |
| GF0024173 | 1                            | 1                         | 0                            | Vignin (2)                                                   | cysteine-type peptidase activity [GO:0008234]<br>molecular_function (2);<br>proteolysis [GO:0006508]<br>biological_process (2)                                                                                                                                                                                                                                                                                                                                                                                                           |                                                                                                                                                                                                                                                                                                                                                                                                                                                                  | scaffold_8_mRNA_376.1           | C_uustinii_00363_mRNA_32.1   | -                               |
| GF0024172 | 1                            | 1                         | 0                            | Class II metallothionein-like protein 1A (2)                 | zinc ion binding [GO:0008270]<br>molecular_function (2)                                                                                                                                                                                                                                                                                                                                                                                                                                                                                  |                                                                                                                                                                                                                                                                                                                                                                                                                                                                  | scaffold_8_mRNA_371.1           | C_uustinii_00376_mRNA_12.1   | -                               |
| GF0024170 | 1                            | 1                         | 0                            | SWIB complex, BAF60b domain-containing family protein (2)    | protein binding [GO:0005515]<br>molecular_function (2)                                                                                                                                                                                                                                                                                                                                                                                                                                                                                   |                                                                                                                                                                                                                                                                                                                                                                                                                                                                  | scaffold_8_mRNA_365.1           | C_uustinii_00024_mRNA_8.1    | -                               |
| GF0024168 | 1                            | 1                         | 0                            | Hypothetical protein (2)                                     |                                                                                                                                                                                                                                                                                                                                                                                                                                                                                                                                          |                                                                                                                                                                                                                                                                                                                                                                                                                                                                  | scaffold_8_mRNA_361.1           | C_uustinii_00376_mRNA_13.1   | -                               |
| GF0024167 | 1                            | 1                         | 0                            | Somatic embryogenesis receptor kinase (2)                    | transmembrane receptor protein kinase activity [GO:0019199]<br>molecular_function (1)                                                                                                                                                                                                                                                                                                                                                                                                                                                    | Leucine-rich repeat-containing N-terminal, plant-type [IPR013210] (2);<br>Leucine-rich repeat domain, L domain-like [IPR032675] (2); Somatic embryogenesis receptor-like kinase [IPR031048] (1)                                                                                                                                                                                                                                                                  | scaffold_8_mRNA_356.2           | C_uustinii_00024_mRNA_15.1   | -                               |
| GF0024166 | 1                            | 1                         | 0                            | Amino acid permease family protein (2)                       | amino acid transmembrane transporter activity [GO:0015171]<br>molecular_function (2); amino acid transmembrane transport [GO:0003333]<br>biological_process (2); membrane [GO:0016020]<br>cellular_component (2)                                                                                                                                                                                                                                                                                                                         | Amino acid polyamine transporter I [IPR002293] (2)                                                                                                                                                                                                                                                                                                                                                                                                               | scaffold_8_mRNA_351.1           | C_uustinii_00024_mRNA_18.1   | -                               |
| GF0024160 | 1                            | 1                         | 0                            | High chlorophyll fluorescence phenotype 173 protein (2)      |                                                                                                                                                                                                                                                                                                                                                                                                                                                                                                                                          |                                                                                                                                                                                                                                                                                                                                                                                                                                                                  | scaffold_8_mRNA_324.1           | C_uustinii_00211_mRNA_24.1   | -                               |
| GF0024158 | 1                            | 1                         | 0                            | Laccase (2)                                                  | lignin catabolic process [GO:0046274]<br>biological_process (2);<br>hydroquinone:oxygen oxidoreductase activity [GO:0052716]<br>molecular_function (2);<br>oxidation-reduction process [GO:0055114]<br>biological_process (2);<br>oxidoreductase activity [GO:0016491]<br>molecular_function (2);<br>proplastid [GO:0048046]<br>cellular_component (2);<br>copper ion binding [GO:0005507]<br>molecular_function (2)                                                                                                                     | Multicopper oxidase, copper-binding site [IPR023255] (2); Multicopper oxidase, type 3 [IPR011707] (2); Multicopper oxidase, conserved site [IPR033138] (2); Laccase [IPR011761] (2); Multicopper oxidase, type 2 [IPR011706] (2); Multicopper oxidase, type 1 [IPR011712] (2); Cupredoxin [IPR008972] (2); Laccase, third cupredoxin domain [IPR034289] (1); Laccase, first cupredoxin domain [IPR034288] (1); Laccase, second cupredoxin domain [IPR034285] (1) | scaffold_8_mRNA_322.1           | C_uustinii_00271_mRNA_23.1   | -                               |
| GF0024156 | 1                            | 1                         | 0                            | Hypothetical protein (2)                                     |                                                                                                                                                                                                                                                                                                                                                                                                                                                                                                                                          |                                                                                                                                                                                                                                                                                                                                                                                                                                                                  | scaffold_8_mRNA_320.1           | C_uustinii_00024_mRNA_45.1   | -                               |
| GF0024155 | 1                            | 1                         | 0                            | Hypothetical protein (2)                                     |                                                                                                                                                                                                                                                                                                                                                                                                                                                                                                                                          |                                                                                                                                                                                                                                                                                                                                                                                                                                                                  | scaffold_8_mRNA_319.1           | C_uustinii_00024_mRNA_110.1  | -                               |
| GF0024151 | 1                            | 1                         | 0                            | Hypothetical protein (2)                                     |                                                                                                                                                                                                                                                                                                                                                                                                                                                                                                                                          |                                                                                                                                                                                                                                                                                                                                                                                                                                                                  | scaffold_8_mRNA_314.9.1         | C_uustinii_00021_mRNA_70.1   | -                               |
| GF0024150 | 1                            | 1                         | 0                            | Transcription factor MYB98 (1); Hypothetical protein (1)     | DNA binding [GO:0003677]<br>molecular_function (1)                                                                                                                                                                                                                                                                                                                                                                                                                                                                                       | SANT/Myb domain [IPR001005] (1);<br>Myb domain [IPR017930] (1);<br>Homeobox domain-like [IPR009057] (1)                                                                                                                                                                                                                                                                                                                                                          | scaffold_8_mRNA_314.5.1         | C_uustinii_00021_mRNA_66.1   | -                               |
| GF0024149 | 1                            | 1                         | 0                            | Thioesterase superfamily protein (2)                         |                                                                                                                                                                                                                                                                                                                                                                                                                                                                                                                                          | HotDog domain [IPR029069] (2);<br>Thioesterase domain [IPR006853] (2)                                                                                                                                                                                                                                                                                                                                                                                            | scaffold_8_mRNA_312.7.1         | C_uustinii_00021_mRNA_49.1   | -                               |
| GF0024148 | 1                            | 1                         | 0                            | Hypothetical protein (2)                                     | proteolysis [GO:0006508]<br>biological_process (2); cysteine-type peptidase activity [GO:0008234]<br>molecular_function (2)                                                                                                                                                                                                                                                                                                                                                                                                              |                                                                                                                                                                                                                                                                                                                                                                                                                                                                  | scaffold_8_mRNA_312.1.1         | C_uustinii_00021_mRNA_43.1   | -                               |
| GF0024147 | 1                            | 1                         | 0                            | Putative sugar phosphate/phosphate translocator (2)          |                                                                                                                                                                                                                                                                                                                                                                                                                                                                                                                                          |                                                                                                                                                                                                                                                                                                                                                                                                                                                                  | scaffold_8_mRNA_311.4.1         | C_uustinii_00021_mRNA_35.1   | -                               |
| GF0024145 | 1                            | 1                         | 0                            | UDP-glucuronosyl/UDP-glucosyl transferase family protein (2) | metabolic process [GO:0008152]<br>biological_process (2); transferase activity, transferring hexosyl groups [GO:0016758]<br>molecular_function (2);<br>iron ion binding [GO:0005506]<br>molecular_function (1); heme binding [GO:0020307]<br>molecular_function (1);<br>oxidation-reduction process [GO:0055114]<br>biological_process (1);<br>oxidoreductase activity, acting on paired donors, with incorporation or reduction of molecular oxygen [GO:0016705]<br>molecular_function (1)                                              | UDP-glucuronosyl/UDP-glucosyltransferase [IPR002213] (2);<br>SANT/Myb domain [IPR001005] (1);<br>Myb domain [IPR017930] (1);<br>Homeobox domain-like [IPR009057] (1);<br>HotDog domain [IPR029069] (2);<br>Thioesterase domain [IPR006853] (2);<br>UDP-glucuronosyl/UDP-glucosyltransferase [IPR002213] (2);<br>Cytochrome P450, E-class, group I [IPR024011] (1);<br>Cytochrome P450 [IPR01128] (1)                                                             | scaffold_8_mRNA_310.4.1         | C_uustinii_00021_mRNA_24.1   | -                               |
| GF0024144 | 1                            | 1                         | 0                            | Copper transporter (2)                                       | copper ion transmembrane transport [GO:0035434]<br>biological_process (2);<br>integral component of membrane [GO:0016021]<br>cellular_component (2);<br>copper ion transmembrane transporter activity [GO:0005375]<br>molecular_function (2)                                                                                                                                                                                                                                                                                             | Ctr copper transporter [IPR007274] (2)                                                                                                                                                                                                                                                                                                                                                                                                                           | scaffold_8_mRNA_308.3.1         | C_uustinii_00117_mRNA_27.1   | -                               |
| GF0024143 | 1                            | 1                         | 0                            | Cucurmin (1); Hypothetical protein (1)                       | serine-type endopeptidase activity [GO:0001625]<br>molecular_function (1);<br>proteolysis [GO:0006508]<br>biological_process (1)                                                                                                                                                                                                                                                                                                                                                                                                         | Peptidase S8 propeptide/proteinase inhibitor 9 [IPR010259] (1);<br>Peptidase S8/S53 domain [IPR000209] (1);<br>Peptidase S8, subtilisin-related [IPR015500] (1)                                                                                                                                                                                                                                                                                                  | scaffold_8_mRNA_307.4.1         | C_uustinii_00117_mRNA_38.1   | -                               |
| GF0024142 | 1                            | 1                         | 0                            | DNA-directed RNA polymerase II non-catalytic subunit (2)     | nucleic acid binding [GO:0003676]<br>molecular_function (2);<br>transcription, DNA-templated [GO:0006351]<br>biological_process (2);<br>DNA-directed RNA polymerase activity [GO:0003999]<br>molecular_function (1);<br>DNA-directed 5'-3' RNA polymerase activity [GO:0003899]<br>molecular_function (1)                                                                                                                                                                                                                                | S1 domain [IPR03029] (2);<br>RNA polymerase Rpb7, N-terminal [IPR005575] (2);<br>RNA polymerase activity, DNA-directed, OB-fold [IPR012340] (2)                                                                                                                                                                                                                                                                                                                  | scaffold_8_mRNA_306.7.1         | C_uustinii_00117_mRNA_48.1   | -                               |
| GF0024141 | 1                            | 1                         | 0                            | Hypothetical protein (2)                                     | metabolic process [GO:0008152]<br>biological_process (1);<br>oxidoreductase activity [GO:0016491]<br>molecular_function (1)                                                                                                                                                                                                                                                                                                                                                                                                              | NAD(P)-binding domain [IPR016040] (2);<br>Short-chain dehydrogenase/reductase SDR [IPR002190] (1)                                                                                                                                                                                                                                                                                                                                                                | scaffold_8_mRNA_305.5.1         | C_uustinii_00117_mRNA_59.1   | -                               |
| GF0024140 | 1                            | 1                         | 0                            | Plastid transcriptionally active 16 (2)                      |                                                                                                                                                                                                                                                                                                                                                                                                                                                                                                                                          |                                                                                                                                                                                                                                                                                                                                                                                                                                                                  | scaffold_8_mRNA_305.0.1         | C_uustinii_00117_mRNA_62.1   | -                               |
| GF0024139 | 1                            | 1                         | 0                            | Hypothetical protein (2)                                     |                                                                                                                                                                                                                                                                                                                                                                                                                                                                                                                                          |                                                                                                                                                                                                                                                                                                                                                                                                                                                                  | scaffold_8_mRNA_303.6.1         | C_uustinii_00251_mRNA_43.1   | -                               |
| GF0024138 | 1                            | 1                         | 0                            | Hypothetical protein (2)                                     |                                                                                                                                                                                                                                                                                                                                                                                                                                                                                                                                          |                                                                                                                                                                                                                                                                                                                                                                                                                                                                  | scaffold_8_mRNA_303.5.1         | C_uustinii_02529_mRNA_5.1    | -                               |













| ID        | Num. in <i>C. clementinae</i> | Num. in <i>C. acutis</i> | Num. in <i>P. trifoliate</i> | Note                                                                                 | GO                                                                                                                                                                                                                                                                                                                 | InterPro                                                                                                                                                                                                                                                                                                                                                                                                                                                                                                                                                                                                                                                  | Members in <i>C. clementinae</i> | Members in <i>C. acutis</i> | Members in <i>P. trifoliate</i> |
|-----------|-------------------------------|--------------------------|------------------------------|--------------------------------------------------------------------------------------|--------------------------------------------------------------------------------------------------------------------------------------------------------------------------------------------------------------------------------------------------------------------------------------------------------------------|-----------------------------------------------------------------------------------------------------------------------------------------------------------------------------------------------------------------------------------------------------------------------------------------------------------------------------------------------------------------------------------------------------------------------------------------------------------------------------------------------------------------------------------------------------------------------------------------------------------------------------------------------------------|----------------------------------|-----------------------------|---------------------------------|
| GF0023755 | 1                             | 1                        | 0                            | Transcription factor (2)                                                             |                                                                                                                                                                                                                                                                                                                    | Ternary complex factor MIF1, leucine-zipper [IPRO23757] (2); Domain of unknown function DUF547 [IPRO06869] (2)                                                                                                                                                                                                                                                                                                                                                                                                                                                                                                                                            | scaffold_7_mRNA_427.1            | C_unshiu_00084_mRNA_38.1    | -                               |
| GF0023750 | 1                             | 1                        | 0                            | Methyltransferase (1); Methyl esterase 10, putative (1)                              |                                                                                                                                                                                                                                                                                                                    | Alpha/Beta hydrolase fold [IPRO29058] (2); Alpha/beta hydrolase fold 4 [IPRO00073] (1)                                                                                                                                                                                                                                                                                                                                                                                                                                                                                                                                                                    | scaffold_7_mRNA_397.1            | C_unshiu_02661_mRNA_2.1     | -                               |
| GF0023746 | 1                             | 1                        | 0                            | TFR domain containing protein (1); Hypothetical protein (1)                          | protein binding [GO:0005515]                                                                                                                                                                                                                                                                                       | Tetratricopeptide-like helical domain [IPRO11990] (2); Tetratricopeptide repeat [IPRO19734] (1)                                                                                                                                                                                                                                                                                                                                                                                                                                                                                                                                                           | scaffold_7_mRNA_378.1            | C_unshiu_00025_mRNA_74.1    | -                               |
| GF0023745 | 1                             | 1                        | 0                            | Hypothetical protein (2)                                                             |                                                                                                                                                                                                                                                                                                                    |                                                                                                                                                                                                                                                                                                                                                                                                                                                                                                                                                                                                                                                           | scaffold_7_mRNA_377.1            | C_unshiu_00025_mRNA_72.1    | -                               |
| GF0023744 | 1                             | 1                        | 0                            | Cold acclimation protein WCOR413 (2)                                                 | integral component of membrane [GO:0016021 cellular_component] (2)                                                                                                                                                                                                                                                 | Cold-regulated 413 protein [IPRO08892] (2)                                                                                                                                                                                                                                                                                                                                                                                                                                                                                                                                                                                                                | scaffold_7_mRNA_375.1            | C_unshiu_00025_mRNA_70.1    | -                               |
| GF0023736 | 1                             | 1                        | 0                            | Septum formation protein Maf (2)                                                     | activity [GO:0047429]                                                                                                                                                                                                                                                                                              | Maf-like protein [IPRO03697] (2); Inositol phosphate pyrophosphatase-like [IPRO29001] (2)                                                                                                                                                                                                                                                                                                                                                                                                                                                                                                                                                                 | scaffold_7_mRNA_297.1            | C_unshiu_00289_mRNA_35.1    | -                               |
| GF0023735 | 1                             | 1                        | 0                            | Hypothetical protein (2)                                                             |                                                                                                                                                                                                                                                                                                                    |                                                                                                                                                                                                                                                                                                                                                                                                                                                                                                                                                                                                                                                           | scaffold_7_mRNA_287.1            | C_unshiu_00289_mRNA_26.1    | -                               |
| GF0023734 | 1                             | 1                        | 0                            | Hypothetical protein (2)                                                             | protein dimerization activity [GO:0046983 molecular_function] (1)                                                                                                                                                                                                                                                  | Mye-type, basic helix-loop-helix (bHLH) domain [IPRO11598] (1)                                                                                                                                                                                                                                                                                                                                                                                                                                                                                                                                                                                            | scaffold_7_mRNA_286.1            | C_unshiu_00289_mRNA_25.1    | -                               |
| GF0023733 | 1                             | 1                        | 0                            | Protein RER1A (2)                                                                    | integral component of membrane [GO:0016021 cellular_component] (2)                                                                                                                                                                                                                                                 | Retrieval of early ER protein Rer1 [IPRO04952] (2)                                                                                                                                                                                                                                                                                                                                                                                                                                                                                                                                                                                                        | scaffold_7_mRNA_279.1            | C_unshiu_00289_mRNA_15.1    | -                               |
| GF0023729 | 1                             | 1                        | 0                            | Hypothetical protein (2)                                                             |                                                                                                                                                                                                                                                                                                                    |                                                                                                                                                                                                                                                                                                                                                                                                                                                                                                                                                                                                                                                           | scaffold_7_mRNA_278.1            | C_unshiu_00001_mRNA_409.1   | -                               |
| GF0023728 | 1                             | 1                        | 0                            | Hypothetical protein (2)                                                             |                                                                                                                                                                                                                                                                                                                    |                                                                                                                                                                                                                                                                                                                                                                                                                                                                                                                                                                                                                                                           | scaffold_7_mRNA_271.3            | C_unshiu_01382_mRNA_10.1    | -                               |
| GF0023727 | 1                             | 1                        | 0                            | Hypothetical protein (2)                                                             |                                                                                                                                                                                                                                                                                                                    |                                                                                                                                                                                                                                                                                                                                                                                                                                                                                                                                                                                                                                                           | scaffold_7_mRNA_270.7            | C_unshiu_01382_mRNA_4.1     | -                               |
| GF0023726 | 1                             | 1                        | 0                            | Hypothetical protein (1); S0S ribosomal protein L23 (1)                              | nucleotide binding [GO:0000166 molecular_function] (1); ribosome [GO:0005840 cellular_component] (1); intracellular [GO:0005622 cellular_component] (1); translation [GO:0006412 biological_process] (1); structural constituent of ribosome [GO:0003735 molecular_function] (1)                                   | Ribosomal protein L25.L23 [IPRO13025] (1); Nucleotide-binding alpha-beta plat domain [IPRO12677] (1); Ribosomal protein L23.L15e core domain [IPRO12678] (1)                                                                                                                                                                                                                                                                                                                                                                                                                                                                                              | scaffold_7_mRNA_2695.1           | C_unshiu_00622_mRNA_11.1    | -                               |
| GF0023724 | 1                             | 1                        | 0                            | Hypothetical protein (2)                                                             |                                                                                                                                                                                                                                                                                                                    | Reverse transcriptase domain [IPRO00477] (1)                                                                                                                                                                                                                                                                                                                                                                                                                                                                                                                                                                                                              | scaffold_7_mRNA_2681.1           | C_unshiu_00940_mRNA_6.1     | -                               |
| GF0023723 | 1                             | 1                        | 0                            | Protein spintin (2)                                                                  | transmembrane transport [GO:0055085 biological_process] (2); integral component of membrane [GO:0016021 cellular_component] (2)                                                                                                                                                                                    | Major facilitator superfamily [IPRO11701] (2); Major facilitator superfamily domain [IPRO20846] (2)                                                                                                                                                                                                                                                                                                                                                                                                                                                                                                                                                       | scaffold_7_mRNA_2680.1           | C_unshiu_00940_mRNA_4.1     | -                               |
| GF0023722 | 1                             | 1                        | 0                            | Tether containing UBX domain for GLUT4, putative (2)                                 |                                                                                                                                                                                                                                                                                                                    |                                                                                                                                                                                                                                                                                                                                                                                                                                                                                                                                                                                                                                                           | scaffold_7_mRNA_2665.1           | C_unshiu_00807_mRNA_7.1     | -                               |
| GF0023721 | 1                             | 1                        | 0                            | Hypothetical protein (2)                                                             |                                                                                                                                                                                                                                                                                                                    |                                                                                                                                                                                                                                                                                                                                                                                                                                                                                                                                                                                                                                                           | scaffold_7_mRNA_2664.1           | C_unshiu_00807_mRNA_8.1     | -                               |
| GF0023720 | 1                             | 1                        | 0                            | Disease resistance protein (2)                                                       | ADP binding [GO:0043531 molecular_function] (2)                                                                                                                                                                                                                                                                    | P-loop containing nucleoside triphosphate hydrolase [IPRO27417] (2); NB-ARC [IPRO02182] (2); Leucine-rich repeat domain, L domain-like [IPRO32675] (2); Winged helix-turn-helix DNA-binding domain [IPRO11991] (1)                                                                                                                                                                                                                                                                                                                                                                                                                                        | scaffold_7_mRNA_2651.1           | C_unshiu_01391_mRNA_3.1     | -                               |
| GF0023719 | 1                             | 1                        | 0                            | Hypothetical protein (2)                                                             |                                                                                                                                                                                                                                                                                                                    |                                                                                                                                                                                                                                                                                                                                                                                                                                                                                                                                                                                                                                                           | scaffold_7_mRNA_2650.1           | C_unshiu_00713_mRNA_1.1     | -                               |
| GF0023718 | 1                             | 1                        | 0                            | LRR and NB-ARC domain disease resistance protein (1); Disease resistance protein (1) | ADP binding [GO:0043531 molecular_function] (2)                                                                                                                                                                                                                                                                    | P-loop containing nucleoside triphosphate hydrolase [IPRO27417] (2); NB-ARC [IPRO02182] (2); Leucine-rich repeat domain, L domain-like [IPRO32675] (2); Winged helix-turn-helix DNA-binding domain [IPRO11991] (1)                                                                                                                                                                                                                                                                                                                                                                                                                                        | scaffold_7_mRNA_2649.1           | C_unshiu_02682_mRNA_3.1     | -                               |
| GF0023717 | 1                             | 1                        | 0                            | Hypothetical protein (2)                                                             | copper ion binding [GO:0005507 molecular_function] (2); oxidoreductase activity [GO:0016491 molecular_function] (2); oxidation-reduction process [GO:0055114 biological_process] (2)                                                                                                                               | Multicopper oxidase, type 2 [IPRO11706] (2); Cupredoxin [IPRO08972] (2)                                                                                                                                                                                                                                                                                                                                                                                                                                                                                                                                                                                   | scaffold_7_mRNA_2632.1           | C_unshiu_02082_mRNA_1.1     | -                               |
| GF0023716 | 1                             | 1                        | 0                            | Hypothetical protein (2)                                                             | copper ion binding [GO:0005507 molecular_function] (2); oxidoreductase activity [GO:0016491 molecular_function] (2); oxidation-reduction process [GO:0055114 biological_process] (2)                                                                                                                               | Cupredoxin [IPRO08972] (2); Multicopper oxidase, type 2 [IPRO11706] (2)                                                                                                                                                                                                                                                                                                                                                                                                                                                                                                                                                                                   | scaffold_7_mRNA_2629.1           | C_unshiu_02082_mRNA_4.1     | -                               |
| GF0023715 | 1                             | 1                        | 0                            | Hypothetical protein (2)                                                             | protein domain specific binding [GO:0019904 molecular_function] (2)                                                                                                                                                                                                                                                | 14-3-3 protein [IPRO00308] (2); 14-3-3 domain [IPRO23414] (2); Myo-inositol-1-phosphate synthase, GIAPDH-like [IPRO13021] (1)                                                                                                                                                                                                                                                                                                                                                                                                                                                                                                                             | scaffold_7_mRNA_2623.1           | C_unshiu_00760_mRNA_15.1    | -                               |
| GF0023714 | 1                             | 1                        | 0                            | Hypothetical protein (2)                                                             |                                                                                                                                                                                                                                                                                                                    | Gag-polyprotein of LTR copia-type [IPRO29472] (1)                                                                                                                                                                                                                                                                                                                                                                                                                                                                                                                                                                                                         | scaffold_7_mRNA_2615.1           | C_unshiu_00519_mRNA_6.1     | -                               |
| GF0023713 | 1                             | 1                        | 0                            | Aspartic protease-like protein 1 (2)                                                 | proteolysis [GO:0006508 biological_process] (2); aspartic-type endopeptidase activity [GO:0004190 molecular_function] (2)                                                                                                                                                                                          | Aspartic peptidase domain [IPRO21109] (2); Peptidase family A1 domain [IPRO33121] (2); Aspartic peptidase A1 family [IPRO01461] (2); Xylanase inhibitor, N-terminal [IPRO32861] (2); Xylanase inhibitor, C-terminal [IPRO32799] (2); Aspartic peptidase, active site [IPRO01969] (2); Pepsin-like domain [IPRO34164] (1)                                                                                                                                                                                                                                                                                                                                  | scaffold_7_mRNA_2613.1           | C_unshiu_00519_mRNA_9.1     | -                               |
| GF0023711 | 1                             | 1                        | 0                            | Hypothetical protein (2)                                                             |                                                                                                                                                                                                                                                                                                                    |                                                                                                                                                                                                                                                                                                                                                                                                                                                                                                                                                                                                                                                           | scaffold_7_mRNA_2598.1           | C_unshiu_01312_mRNA_3.1     | -                               |
| GF0023710 | 1                             | 1                        | 0                            | Hypothetical protein (2)                                                             |                                                                                                                                                                                                                                                                                                                    |                                                                                                                                                                                                                                                                                                                                                                                                                                                                                                                                                                                                                                                           | scaffold_7_mRNA_2579.1           | C_unshiu_00854_mRNA_7.1     | -                               |
| GF0023709 | 1                             | 1                        | 0                            | Hypothetical protein (2)                                                             |                                                                                                                                                                                                                                                                                                                    |                                                                                                                                                                                                                                                                                                                                                                                                                                                                                                                                                                                                                                                           | scaffold_7_mRNA_2577.1           | C_unshiu_00854_mRNA_6.1     | -                               |
| GF0023708 | 1                             | 1                        | 0                            | Hypothetical protein (1); Retrotransposon protein, putative, Ty1-copia subclass (1)  |                                                                                                                                                                                                                                                                                                                    | GAG-pre-integrase domain [IPRO25724] (1)                                                                                                                                                                                                                                                                                                                                                                                                                                                                                                                                                                                                                  | scaffold_7_mRNA_2569.1           | C_unshiu_00454_mRNA_2.1     | -                               |
| GF0023707 | 1                             | 1                        | 0                            | Hypothetical protein (2)                                                             |                                                                                                                                                                                                                                                                                                                    |                                                                                                                                                                                                                                                                                                                                                                                                                                                                                                                                                                                                                                                           | scaffold_7_mRNA_2566.1           | C_unshiu_00454_mRNA_5.1     | -                               |
| GF0023705 | 1                             | 1                        | 0                            | Hypothetical protein (2)                                                             |                                                                                                                                                                                                                                                                                                                    |                                                                                                                                                                                                                                                                                                                                                                                                                                                                                                                                                                                                                                                           | scaffold_7_mRNA_2548.1           | C_unshiu_00454_mRNA_19.1    | -                               |
| GF0023703 | 1                             | 1                        | 0                            | Hypothetical protein (2)                                                             |                                                                                                                                                                                                                                                                                                                    | Domain of unknown function DUF4283 [IPRO25558] (2)                                                                                                                                                                                                                                                                                                                                                                                                                                                                                                                                                                                                        | scaffold_7_mRNA_2527.1           | C_unshiu_00245_mRNA_19.1    | -                               |
| GF0023701 | 1                             | 1                        | 0                            | Hypothetical protein (2)                                                             | iron ion binding [GO:0005506 molecular_function] (1); heme binding [GO:0020037 molecular_function] (1); oxidation-reduction process [GO:0055114 biological_process] (1); oxidoreductase activity, acting on paired donors, with incorporation or reduction of molecular oxygen [GO:0016705 molecular_function] (1) | Cytochrome P450 [IPRO01128] (1)                                                                                                                                                                                                                                                                                                                                                                                                                                                                                                                                                                                                                           | scaffold_7_mRNA_2520.1           | C_unshiu_01469_mRNA_2.1     | -                               |
| GF0023700 | 1                             | 1                        | 0                            | Somatic embryogenesis receptor kinase (2)                                            | protein binding [GO:0005515 molecular_function] (2); ATP binding [GO:0005524 molecular_function] (2); protein phosphorylation [GO:0006468 biological_process] (2); protein kinase activity [GO:0004672 molecular_function] (2)                                                                                     | Protein kinase-like domain [IPRO11009] (2); Leucine-rich repeat domain, L domain-like [IPRO32675] (2); Protein kinase domain [IPRO00719] (2); Leucine-rich repeat [IPRO01611] (2); Serine/threonine-protein kinase, active site [IPRO08271] (2); Protein kinase, ATP binding site [IPRO17441] (2); Leucine-rich repeat-containing N-terminal, plant-type [IPRO13210] (2); Leucine-rich repeat, typical subtype [IPRO03591] (1); Concansolin A-like lectin glucanase domain [IPRO13320] (1); Serine-threonine/tyrosine-protein kinase catalytic domain [IPRO01245] (1); Serine/threonine/dual specificity protein kinase, catalytic domain [IPRO22290] (1) | scaffold_7_mRNA_2507.1           | C_unshiu_00441_mRNA_8.1     | -                               |
| GF0023697 | 1                             | 1                        | 0                            | Hypothetical protein (2)                                                             |                                                                                                                                                                                                                                                                                                                    |                                                                                                                                                                                                                                                                                                                                                                                                                                                                                                                                                                                                                                                           | scaffold_7_mRNA_2495.1           | C_unshiu_00594_mRNA_9.1     | -                               |
| GF0023696 | 1                             | 1                        | 0                            | Hypothetical protein (2)                                                             |                                                                                                                                                                                                                                                                                                                    |                                                                                                                                                                                                                                                                                                                                                                                                                                                                                                                                                                                                                                                           | scaffold_7_mRNA_2490.1           | C_unshiu_02139_mRNA_5.2     | -                               |
| GF0023695 | 1                             | 1                        | 0                            | Hypothetical protein (1); Disease resistance RPM1-like protein (1)                   | ADP binding [GO:0043531 molecular_function] (1)                                                                                                                                                                                                                                                                    | Leucine-rich repeat domain, L domain-like [IPRO32675] (2); Winged helix-turn-helix DNA-binding domain [IPRO11991] (1); NB-ARC [IPRO02182] (1)                                                                                                                                                                                                                                                                                                                                                                                                                                                                                                             | scaffold_7_mRNA_2486.1           | C_unshiu_00468_mRNA_14.1    | -                               |
| GF0023694 | 1                             | 1                        | 0                            | Hypothetical protein (2)                                                             | nucleic acid binding [GO:0003676 molecular_function] (1)                                                                                                                                                                                                                                                           | Ribonuclease H-like domain [IPRO12337] (1)                                                                                                                                                                                                                                                                                                                                                                                                                                                                                                                                                                                                                | scaffold_7_mRNA_2485.1           | C_unshiu_00468_mRNA_15.1    | -                               |
| GF0023693 | 1                             | 1                        | 0                            | RPM1-interacting protein 4 (RIN4) family protein (2)                                 |                                                                                                                                                                                                                                                                                                                    |                                                                                                                                                                                                                                                                                                                                                                                                                                                                                                                                                                                                                                                           | scaffold_7_mRNA_2473.1           | C_unshiu_00468_mRNA_30.2    | -                               |
| GF0023691 | 1                             | 1                        | 0                            | Hypothetical protein (2)                                                             | nucleic acid binding [GO:0003676 molecular_function] (2); zinc ion binding [GO:0008270 molecular_function] (2)                                                                                                                                                                                                     | Zinc finger, CCHC-type [IPRO01878] (2)                                                                                                                                                                                                                                                                                                                                                                                                                                                                                                                                                                                                                    | scaffold_7_mRNA_2456.1           | C_unshiu_00566_mRNA_18.1    | -                               |
| GF0023690 | 1                             | 1                        | 0                            | Hypothetical protein (2)                                                             |                                                                                                                                                                                                                                                                                                                    | High mobility group box domain [IPRO09071] (1)                                                                                                                                                                                                                                                                                                                                                                                                                                                                                                                                                                                                            | scaffold_7_mRNA_2455.1           | C_unshiu_00566_mRNA_17.1    | -                               |
| GF0023688 | 1                             | 1                        | 0                            | Mechanosensitive ion channel protein (2)                                             | transmembrane transport [GO:0055085 biological_process] (2); calcium ion binding [GO:0005509 molecular_function] (2); membrane [GO:0016020 cellular_component] (2)                                                                                                                                                 | Mechanosensitive ion channel MscS [IPRO06685] (2); EF-hand domain [IPRO02048] (2); LSM domain [IPRO10920] (2); Mechanosensitive ion channel MscS-like, plants/fungi [IPRO16688] (2); EF-hand domain pair [IPRO11992] (1)                                                                                                                                                                                                                                                                                                                                                                                                                                  | scaffold_7_mRNA_2446.1           | C_unshiu_00566_mRNA_7.1     | -                               |
| GF0023687 | 1                             | 1                        | 0                            | Hypothetical protein (2)                                                             |                                                                                                                                                                                                                                                                                                                    |                                                                                                                                                                                                                                                                                                                                                                                                                                                                                                                                                                                                                                                           | scaffold_7_mRNA_2439.1           | C_unshiu_01193_mRNA_2.1     | -                               |
| GF0023686 | 1                             | 1                        | 0                            | Hypothetical protein (2)                                                             |                                                                                                                                                                                                                                                                                                                    |                                                                                                                                                                                                                                                                                                                                                                                                                                                                                                                                                                                                                                                           | scaffold_7_mRNA_2433.1           | C_unshiu_00357_mRNA_14.1    | -                               |
| GF0023685 | 1                             | 1                        | 0                            | Putative WRKY transcription factor 51 (2)                                            | transcription factor activity, sequence-specific DNA binding [GO:0003700 biological_function] (2); regulation of transcription, DNA-templated [GO:0006355 biological_process] (2); sequence-specific DNA binding [GO:0043565 molecular_function] (2)                                                               | WRKY domain [IPRO03657] (2)                                                                                                                                                                                                                                                                                                                                                                                                                                                                                                                                                                                                                               | scaffold_7_mRNA_2425.1           | C_unshiu_00634_mRNA_6.1     | -                               |
| GF0023684 | 1                             | 1                        | 0                            | Hypothetical protein (2)                                                             |                                                                                                                                                                                                                                                                                                                    |                                                                                                                                                                                                                                                                                                                                                                                                                                                                                                                                                                                                                                                           | scaffold_7_mRNA_2417.1           | C_unshiu_01284_mRNA_10.1    | -                               |



| ID        | Num. in <i>C. caryophyllata</i> | Num. in <i>C. acutis</i> | Num. in <i>P. trifoliata</i> | Note                                                                                  | GO                                                                                                                                                                                                                                                                                                                                                                                                                                                                                                                                                                                                                | InterPro                                                                                                                                                                                                                                                                                                                                                                                                                                                                                                                                                                                                                                                                                                                                      | Members in <i>C. caryophyllata</i> | Members in <i>C. acutis</i> | Members in <i>P. trifoliata</i> |
|-----------|---------------------------------|--------------------------|------------------------------|---------------------------------------------------------------------------------------|-------------------------------------------------------------------------------------------------------------------------------------------------------------------------------------------------------------------------------------------------------------------------------------------------------------------------------------------------------------------------------------------------------------------------------------------------------------------------------------------------------------------------------------------------------------------------------------------------------------------|-----------------------------------------------------------------------------------------------------------------------------------------------------------------------------------------------------------------------------------------------------------------------------------------------------------------------------------------------------------------------------------------------------------------------------------------------------------------------------------------------------------------------------------------------------------------------------------------------------------------------------------------------------------------------------------------------------------------------------------------------|------------------------------------|-----------------------------|---------------------------------|
| GF0023623 | 1                               | 1                        | 0                            | Hypothetical protein (2)                                                              |                                                                                                                                                                                                                                                                                                                                                                                                                                                                                                                                                                                                                   |                                                                                                                                                                                                                                                                                                                                                                                                                                                                                                                                                                                                                                                                                                                                               | scaffold_7_mRNA_2111.1             | C_unshiu_01722_mRNA_4.1     | -                               |
| GF0023622 | 1                               | 1                        | 0                            | Hypothetical protein (2)                                                              |                                                                                                                                                                                                                                                                                                                                                                                                                                                                                                                                                                                                                   |                                                                                                                                                                                                                                                                                                                                                                                                                                                                                                                                                                                                                                                                                                                                               | scaffold_7_mRNA_2108.1             | C_unshiu_01722_mRNA_4.1     | -                               |
| GF0023621 | 1                               | 1                        | 0                            | Hypothetical protein (2)                                                              | nucleic acid binding [GO:0003676 molecular_function] (1); zinc ion binding [GO:0008270 molecular_function] (1) heme binding [GO:0020037 molecular_function] (2); iron ion binding [GO:0005506 molecular_function] (2); oxidoreductase activity, acting on paired donors, with incorporation or reduction of molecular oxygen [GO:0016705 molecular_function] (2); oxidation-reduction process [GO:0055114 biological_process] (2)                                                                                                                                                                                 | Zinc finger, CCHC-type [IPRO01878] (1) scaffold_7_mRNA_2107.1                                                                                                                                                                                                                                                                                                                                                                                                                                                                                                                                                                                                                                                                                 | C_unshiu_00968_mRNA_2.1            | -                           |                                 |
| GF0023620 | 1                               | 1                        | 0                            | Flavonoid 3'-monooxygenase (1); Flavonoid 3-monooxygenase (1)                         |                                                                                                                                                                                                                                                                                                                                                                                                                                                                                                                                                                                                                   | Cytochrome P450 [IPRO01128] (2); Cytochrome P450, E-class, group 1 [IPRO02401] (1)                                                                                                                                                                                                                                                                                                                                                                                                                                                                                                                                                                                                                                                            | scaffold_7_mRNA_2104.1             | C_unshiu_00968_mRNA_3.1     | -                               |
| GF0023619 | 1                               | 1                        | 0                            | RNA-binding protein with multiple splicing 2 (2)                                      | nucleic acid binding [GO:0003676 molecular_function] (2); nucleotide binding [GO:0000166 molecular_function] (1) oxidoreductase activity, acting on paired donors, with incorporation or reduction of molecular oxygen [GO:0016705 molecular_function] (2); oxidation-reduction process [GO:0055114 biological_process] (2)                                                                                                                                                                                                                                                                                       | RNA recognition motif domain [IPRO00594] (2); Nucleotide-binding alpha-beta sheet domain [IPRO12677] (1)                                                                                                                                                                                                                                                                                                                                                                                                                                                                                                                                                                                                                                      | scaffold_7_mRNA_2101.1             | C_unshiu_00968_mRNA_7.1     | -                               |
| GF0023618 | 1                               | 1                        | 0                            | Flavonoid 3'-monooxygenase (2)                                                        |                                                                                                                                                                                                                                                                                                                                                                                                                                                                                                                                                                                                                   | Cytochrome P450, E-class, group 1 [IPRO02401] (2); Cytochrome P450, conserved site [IPRO17922] (2); Cytochrome P450 [IPRO01128] (2)                                                                                                                                                                                                                                                                                                                                                                                                                                                                                                                                                                                                           | scaffold_7_mRNA_2099.1             | C_unshiu_00968_mRNA_13.1    | -                               |
| GF0023617 | 1                               | 1                        | 0                            | Phosphoglycerate dehydrogenase (2)                                                    | metabolic process [GO:0008152 biological_process] (2); L-serine biosynthetic process [GO:0006564 biological_process] (2); amino acid binding [GO:0016597 molecular_function] (2); phosphoglycerate dehydrogenase activity [GO:0004617 molecular_function] (2); oxidation-reduction process [GO:0055114 biological_process] (2); oxidoreductase activity, acting on the CH-OH group of donors, NAD or NADP as acceptor [GO:0016616 molecular_function] (2); NAD binding [GO:0051287 molecular_function] (2)                                                                                                        | D-isomer specific 2-hydroxyacid dehydrogenase, catalytic domain [IPRO0139] (2); D-isomer specific 2-hydroxyacid dehydrogenase, NAD-binding domain conserved site [IPRO29753] (2); ACT domain [IPRO02912] (2); D-isomer specific 2-hydroxyacid dehydrogenase, NAD-binding domain [IPRO06140] (2); D-3-phosphoglycerate dehydrogenase [IPRO0236] (2); D-isomer specific 2-hydroxyacid dehydrogenase, NAD-binding domain conserved site 1 [IPRO29752] (2); Allosteric substrate binding domain [IPRO29009] (2); NAD(P)-binding domain [IPRO16040] (2)                                                                                                                                                                                            | scaffold_7_mRNA_2097.1             | C_unshiu_02401_mRNA_1.1     | -                               |
| GF0023616 | 1                               | 1                        | 0                            | Hypothetical protein (2)                                                              |                                                                                                                                                                                                                                                                                                                                                                                                                                                                                                                                                                                                                   | Leucine-rich repeat domain, I. domain-like [IPRO32675] (2); Leucine-rich repeat, typical subtype [IPRO03591] (2); Leucine-rich repeat [IPRO01611] (2); NB-ARC [IPRO02182] (2); P-loop containing nucleoside triphosphate hydrolase [IPRO27417] (2); Winged helix-turn-helix DNA-binding domain [IPRO11991] (1)                                                                                                                                                                                                                                                                                                                                                                                                                                | scaffold_7_mRNA_2094.1             | C_unshiu_00690_mRNA_12.1    | -                               |
| GF0023614 | 1                               | 1                        | 0                            | Disease resistance protein RPS2 (2)                                                   | ADP binding [GO:0043531 molecular_function] (2); protein binding [GO:0005515 molecular_function] (2)                                                                                                                                                                                                                                                                                                                                                                                                                                                                                                              |                                                                                                                                                                                                                                                                                                                                                                                                                                                                                                                                                                                                                                                                                                                                               | scaffold_7_mRNA_2084.1             | C_unshiu_02972_mRNA_1.1     | -                               |
| GF0023612 | 1                               | 1                        | 0                            | Hypothetical protein (2)                                                              |                                                                                                                                                                                                                                                                                                                                                                                                                                                                                                                                                                                                                   |                                                                                                                                                                                                                                                                                                                                                                                                                                                                                                                                                                                                                                                                                                                                               | scaffold_7_mRNA_2061.1             | C_unshiu_00703_mRNA_14.1    | -                               |
| GF0023611 | 1                               | 1                        | 0                            | Hypothetical protein (2)                                                              |                                                                                                                                                                                                                                                                                                                                                                                                                                                                                                                                                                                                                   |                                                                                                                                                                                                                                                                                                                                                                                                                                                                                                                                                                                                                                                                                                                                               | scaffold_7_mRNA_2056.1             | C_unshiu_01521_mRNA_3.1     | -                               |
| GF0023610 | 1                               | 1                        | 0                            | Hypothetical protein (2)                                                              | heme binding [GO:0020037 molecular_function] (2); iron ion binding [GO:0005506 molecular_function] (2); oxidation-reduction process [GO:0055114 biological_process] (2); oxidoreductase activity, acting on paired donors, with incorporation or reduction of molecular oxygen [GO:0016705 molecular_function] (2)                                                                                                                                                                                                                                                                                                | Cytochrome P450 [IPRO01128] (2); Domain of unknown function DUF4216 [IPRO25312] (2); Cytochrome P450, E-class, group 1 [IPRO02401] (1); Domain of unknown function DUF4218 [IPRO25452] (1)                                                                                                                                                                                                                                                                                                                                                                                                                                                                                                                                                    | scaffold_7_mRNA_2052.1             | C_unshiu_01894_mRNA_4.1     | -                               |
| GF0023608 | 1                               | 1                        | 0                            | Hypothetical protein (2)                                                              |                                                                                                                                                                                                                                                                                                                                                                                                                                                                                                                                                                                                                   |                                                                                                                                                                                                                                                                                                                                                                                                                                                                                                                                                                                                                                                                                                                                               | scaffold_7_mRNA_2040.1             | C_unshiu_00763_mRNA_1.1     | -                               |
| GF0023603 | 1                               | 1                        | 0                            | Hypothetical protein (2)                                                              |                                                                                                                                                                                                                                                                                                                                                                                                                                                                                                                                                                                                                   |                                                                                                                                                                                                                                                                                                                                                                                                                                                                                                                                                                                                                                                                                                                                               | scaffold_7_mRNA_2015.1             | C_unshiu_01047_mRNA_6.1     | -                               |
| GF0023602 | 1                               | 1                        | 0                            | Cyclic nucleotide-gated ion channel, putative (2)                                     | ion transport [GO:0006811 biological_process] (2); transmembrane transport [GO:0055086 biological_process] (2); ion channel activity [GO:0005216 molecular_function] (2); membrane [GO:0016020 cellular_component] (2) ATPase activity [GO:0016887 molecular_function] (2); integral component of membrane [GO:0016021 cellular_component] (2); transport [GO:0006810 biological_process] (2); ATPase activity, coupled to transmembrane movement of substances [GO:0042626 molecular_function] (2); transmembrane transport [GO:0055085 biological_process] (2); ATP binding [GO:0005524 molecular_function] (2) | Cyclic nucleotide-binding domain [IPRO00955] (2); Brink-like jelly roll fold [IPRO14710] (2); Cyclic nucleotide-binding-like [IPRO18490] (2); Ion transport domain [IPRO05821] (2)                                                                                                                                                                                                                                                                                                                                                                                                                                                                                                                                                            | scaffold_7_mRNA_2003.1             | C_unshiu_01243_mRNA_1.1     | -                               |
| GF0023601 | 1                               | 1                        | 0                            | Multidrug resistance associated protein 2 (1); ABC transporter C family member 13 (1) |                                                                                                                                                                                                                                                                                                                                                                                                                                                                                                                                                                                                                   | ABC transporter, conserved site [IPRO17871] (2); ABC transporter-like [IPRO04349] (2); ABC transporter type 1, transmembrane domain [IPRO11527] (2); AAA+ ATPase domain [IPRO03593] (2); P-loop containing nucleoside triphosphate hydrolase [IPRO27417] (2)                                                                                                                                                                                                                                                                                                                                                                                                                                                                                  | scaffold_7_mRNA_1993.1             | C_unshiu_01243_mRNA_5.1     | -                               |
| GF0023600 | 1                               | 1                        | 0                            | Hypothetical protein (2)                                                              |                                                                                                                                                                                                                                                                                                                                                                                                                                                                                                                                                                                                                   |                                                                                                                                                                                                                                                                                                                                                                                                                                                                                                                                                                                                                                                                                                                                               | scaffold_7_mRNA_1989.1             | C_unshiu_00637_mRNA_12.1    | -                               |
| GF0023598 | 1                               | 1                        | 0                            | Hypothetical protein (2)                                                              |                                                                                                                                                                                                                                                                                                                                                                                                                                                                                                                                                                                                                   |                                                                                                                                                                                                                                                                                                                                                                                                                                                                                                                                                                                                                                                                                                                                               | scaffold_7_mRNA_198.1              | C_unshiu_00218_mRNA_17.1    | -                               |
| GF0023596 | 1                               | 1                        | 0                            | Hypothetical protein (2)                                                              |                                                                                                                                                                                                                                                                                                                                                                                                                                                                                                                                                                                                                   |                                                                                                                                                                                                                                                                                                                                                                                                                                                                                                                                                                                                                                                                                                                                               | scaffold_7_mRNA_198.1              | C_unshiu_00884_mRNA_8.1     | -                               |
| GF0023595 | 1                               | 1                        | 0                            | Disease resistance RPS2-like protein (1); Hypothetical protein (1)                    | ADP binding [GO:0043531 molecular_function] (2)                                                                                                                                                                                                                                                                                                                                                                                                                                                                                                                                                                   |                                                                                                                                                                                                                                                                                                                                                                                                                                                                                                                                                                                                                                                                                                                                               | scaffold_7_mRNA_1967.1             | C_unshiu_01884_mRNA_1.1     | -                               |
| GF0023594 | 1                               | 1                        | 0                            | Hypothetical protein (2)                                                              |                                                                                                                                                                                                                                                                                                                                                                                                                                                                                                                                                                                                                   |                                                                                                                                                                                                                                                                                                                                                                                                                                                                                                                                                                                                                                                                                                                                               | scaffold_7_mRNA_1962.1             | C_unshiu_02045_mRNA_5.1     | -                               |
| GF0023592 | 1                               | 1                        | 0                            | Hypothetical protein (2)                                                              | protein binding [GO:0005515 molecular_function] (2)                                                                                                                                                                                                                                                                                                                                                                                                                                                                                                                                                               | WD40-YVTN repeat-like-containing domain [IPRO15943] (2); WD40 repeat-containing domain [IPRO17986] (2) Leucine-rich repeat-containing N-terminal, plant-type [IPRO13210] (2); Leucine-rich repeat [IPRO01611] (2); Leucine-rich repeat domain, I. domain-like [IPRO32675] (2); Leucine-rich repeat, typical subtype [IPRO03591] (2)                                                                                                                                                                                                                                                                                                                                                                                                           | scaffold_7_mRNA_1936.1             | C_unshiu_01836_mRNA_1.1     | -                               |
| GF0023590 | 1                               | 1                        | 0                            | Verticillium wilt resistance-like protein (2)                                         | protein binding [GO:0005515 molecular_function] (2)                                                                                                                                                                                                                                                                                                                                                                                                                                                                                                                                                               | Leucine-rich repeat [IPRO01611] (2); Leucine-rich repeat domain, I. domain-like [IPRO32675] (2); Leucine-rich repeat, typical subtype [IPRO03591] (2)                                                                                                                                                                                                                                                                                                                                                                                                                                                                                                                                                                                         | scaffold_7_mRNA_1932.1             | C_unshiu_01728_mRNA_3.1     | -                               |
| GF0023589 | 1                               | 1                        | 0                            | Hypothetical protein (2)                                                              |                                                                                                                                                                                                                                                                                                                                                                                                                                                                                                                                                                                                                   | Iron hydrogenase [IPRO09016] (2); Iron hydrogenase, small subunit [IPRO03149] (2); Iron hydrogenase, large subunit, C-terminal [IPRO04108] (2)                                                                                                                                                                                                                                                                                                                                                                                                                                                                                                                                                                                                | scaffold_7_mRNA_1921.1             | C_unshiu_00344_mRNA_13.1    | -                               |
| GF0023588 | 1                               | 1                        | 0                            | Hypothetical protein (1); Cysteine-rich RLK (Receptor-like kinase) protein (1)        | ATP binding [GO:000524 molecular_function] (2); protein phosphorylation [GO:0006468 biological_process] (2); protein kinase activity [GO:0004672 molecular_function] (2); protein binding [GO:0005515 molecular_function] (2); protein serine/threonine kinase activity [GO:0004674 molecular_function] (1)                                                                                                                                                                                                                                                                                                       | Protein kinase-like domain [IPRO11009] (2); Protein kinase domain [IPRO00719] (2); WD40-repeat-containing domain [IPRO17986] (2); WD40 repeat [IPRO01680] (2); Serine/threonine-protein kinase, active site [IPRO08271] (2); WD40-YVTN repeat-like-containing domain [IPRO15943] (2); Concavalin A-like lectin/glucanase domain [IPRO13320] (1); Leucine-rich repeat domain, I. domain-like [IPRO32675] (1); Leucine-rich repeat [IPRO01611] (1); Serine-threonine/tyrosine-protein kinase catalytic domain [IPRO1245] (1); Serine-threonine/tyrosine-protein kinase, catalytic domain [IPRO1245] (1); Serine/threonine/dual specificity protein kinase, catalytic domain [IPRO2290] (1); S-locus receptor kinase, C-terminal [IPRO21820] (1) | scaffold_7_mRNA_1920.1             | C_unshiu_00344_mRNA_14.1    | -                               |
| GF0023587 | 1                               | 1                        | 0                            | RNA polymerase I-specific transcription initiation factor RRNS (2)                    |                                                                                                                                                                                                                                                                                                                                                                                                                                                                                                                                                                                                                   | RNA polymerase I specific transcription initiation factor RRNS [IPRO07991] (2)                                                                                                                                                                                                                                                                                                                                                                                                                                                                                                                                                                                                                                                                | scaffold_7_mRNA_191.1              | C_unshiu_00706_mRNA_7.1     | -                               |
| GF0023586 | 1                               | 1                        | 0                            | Hypothetical protein (2)                                                              |                                                                                                                                                                                                                                                                                                                                                                                                                                                                                                                                                                                                                   | Plant self-incompatibility S1 [IPRO10264] (2)                                                                                                                                                                                                                                                                                                                                                                                                                                                                                                                                                                                                                                                                                                 | scaffold_7_mRNA_1888.1             | C_unshiu_00302_mRNA_3.1     | -                               |
| GF0023585 | 1                               | 1                        | 0                            | Hypothetical protein (2)                                                              |                                                                                                                                                                                                                                                                                                                                                                                                                                                                                                                                                                                                                   |                                                                                                                                                                                                                                                                                                                                                                                                                                                                                                                                                                                                                                                                                                                                               | scaffold_7_mRNA_1886.1             | C_unshiu_00302_mRNA_5.1     | -                               |
| GF0023584 | 1                               | 1                        | 0                            | Hypothetical protein (2)                                                              |                                                                                                                                                                                                                                                                                                                                                                                                                                                                                                                                                                                                                   |                                                                                                                                                                                                                                                                                                                                                                                                                                                                                                                                                                                                                                                                                                                                               | scaffold_7_mRNA_1866.1             | C_unshiu_00301_mRNA_25.1    | -                               |
| GF0023583 | 1                               | 1                        | 0                            | UPP0481 plant-like protein (2)                                                        |                                                                                                                                                                                                                                                                                                                                                                                                                                                                                                                                                                                                                   | Protein of unknown function DUF247, plant [IPRO04158] (2)                                                                                                                                                                                                                                                                                                                                                                                                                                                                                                                                                                                                                                                                                     | scaffold_7_mRNA_1862.1             | C_unshiu_00302_mRNA_29.1    | -                               |
| GF0023582 | 1                               | 1                        | 0                            | Ankyrin repeat plant-like protein (1); Ankyrin repeat protein (1)                     | protein binding [GO:0005515 molecular_function] (1)                                                                                                                                                                                                                                                                                                                                                                                                                                                                                                                                                               | Ankyrin repeat-containing domain [IPRO20853] (2); RGG domain [IPRO26961] (2); Ankyrin repeat [IPRO02110] (1)                                                                                                                                                                                                                                                                                                                                                                                                                                                                                                                                                                                                                                  | scaffold_7_mRNA_1847.1             | C_unshiu_02133_mRNA_1.1     | -                               |
| GF0023581 | 1                               | 1                        | 0                            | NBS-LRR type disease resistance protein (2)                                           | ADP binding [GO:0043531 molecular_function] (2)                                                                                                                                                                                                                                                                                                                                                                                                                                                                                                                                                                   | P-loop containing nucleoside triphosphate hydrolase [IPRO27417] (2); NB-ARC [IPRO02182] (2); Winged helix-turn-helix DNA-binding domain [IPRO11991] (1); AAA+ ATPase domain [IPRO03593] (1)                                                                                                                                                                                                                                                                                                                                                                                                                                                                                                                                                   | scaffold_7_mRNA_1843.1             | C_unshiu_02601_mRNA_4.1     | -                               |
| GF0023580 | 1                               | 1                        | 0                            | Hypothetical protein (2)                                                              | regulation of transcription, DNA-templated [GO:0006355 biological_process] (2); transcription cofactor activity [GO:0003712 molecular_function] (2)                                                                                                                                                                                                                                                                                                                                                                                                                                                               | Coactivator CBP, KIX domain [IPRO03101] (2)                                                                                                                                                                                                                                                                                                                                                                                                                                                                                                                                                                                                                                                                                                   | scaffold_7_mRNA_1841.1             | C_unshiu_02601_mRNA_1.1     | -                               |
| GF0023579 | 1                               | 1                        | 0                            | Hypothetical protein (2)                                                              |                                                                                                                                                                                                                                                                                                                                                                                                                                                                                                                                                                                                                   |                                                                                                                                                                                                                                                                                                                                                                                                                                                                                                                                                                                                                                                                                                                                               | scaffold_7_mRNA_1839.1             | C_unshiu_01605_mRNA_7.1     | -                               |

| ID        | Num. in <i>C. caryophyllata</i> | Num. in <i>C. acutata</i> | Num. in <i>P. trifoliata</i> | Note                                                                                    | GO                                                                                                                                                                                                                                                                                                                                                         | InterPro                                                                                                                                                                                                                                                                                                                                                                                                                                                                                                                                                                                                                                                                                                 | Members in <i>C. caryophyllata</i> | Members in <i>C. acutata</i> | Members in <i>P. trifoliata</i> |
|-----------|---------------------------------|---------------------------|------------------------------|-----------------------------------------------------------------------------------------|------------------------------------------------------------------------------------------------------------------------------------------------------------------------------------------------------------------------------------------------------------------------------------------------------------------------------------------------------------|----------------------------------------------------------------------------------------------------------------------------------------------------------------------------------------------------------------------------------------------------------------------------------------------------------------------------------------------------------------------------------------------------------------------------------------------------------------------------------------------------------------------------------------------------------------------------------------------------------------------------------------------------------------------------------------------------------|------------------------------------|------------------------------|---------------------------------|
| GF0023578 | 1                               | 1                         | 0                            | Hypothetical protein (2)                                                                |                                                                                                                                                                                                                                                                                                                                                            | Leucine-rich repeat domain, L domain-like [IPR032675] (1)                                                                                                                                                                                                                                                                                                                                                                                                                                                                                                                                                                                                                                                | scaffold_7_mRNA_1826.1             | C.unshiu_01319_mRNA_2.1      | -                               |
| GF0023577 | 1                               | 1                         | 0                            | Miraculin (2)                                                                           | endopeptidase inhibitor activity [GO:0004866 molecular_function] (2)                                                                                                                                                                                                                                                                                       | Protasein inhibitor I3, Kunitz legume [IPR002160] (2); Kunitz inhibitor ST1-like [IPR011065] (2)                                                                                                                                                                                                                                                                                                                                                                                                                                                                                                                                                                                                         | scaffold_7_mRNA_1802.1             | C.unshiu_01097_mRNA_13.1     | -                               |
| GF0023572 | 1                               | 1                         | 0                            | Hypothetical protein (2)                                                                |                                                                                                                                                                                                                                                                                                                                                            | Aspartic-peptidase domain [IPR021109] (2)                                                                                                                                                                                                                                                                                                                                                                                                                                                                                                                                                                                                                                                                | scaffold_7_mRNA_1744.1             | C.unshiu_00460_mRNA_13.1     | -                               |
| GF0023571 | 1                               | 1                         | 0                            | Hypothetical protein (2)                                                                |                                                                                                                                                                                                                                                                                                                                                            |                                                                                                                                                                                                                                                                                                                                                                                                                                                                                                                                                                                                                                                                                                          | scaffold_7_mRNA_1709.1             | C.unshiu_00877_mRNA_7.1      | -                               |
| GF0023569 | 1                               | 1                         | 0                            | Disease resistance protein RFL1, putative (1); Disease resistance RPS5-like protein (1) | protein binding [GO:0005515 molecular_function] (2); ADP binding [GO:0043531 molecular_function] (2)                                                                                                                                                                                                                                                       | P-loop containing nucleoside triphosphate hydrolase [IPR027417] (2); NB-ARC [IPR002182] (2); Leucine-rich repeat domain, L domain-like [IPR032675] (2); Winged helix-turn-helix DNA-binding domain [IPR011991] (1)                                                                                                                                                                                                                                                                                                                                                                                                                                                                                       | scaffold_7_mRNA_1683.1             | C.unshiu_00352_mRNA_13.1     | -                               |
| GF0023566 | 1                               | 1                         | 0                            | Hypothetical protein (2)                                                                |                                                                                                                                                                                                                                                                                                                                                            |                                                                                                                                                                                                                                                                                                                                                                                                                                                                                                                                                                                                                                                                                                          | scaffold_7_mRNA_1634.1             | C.unshiu_00429_mRNA_4.1      | -                               |
| GF0023565 | 1                               | 1                         | 0                            | Hypothetical protein (2)                                                                | zinc ion binding [GO:0008270 molecular_function] (2); regulation of transcription, DNA-templated [GO:0006355 biological_process] (2)                                                                                                                                                                                                                       | FHY3/FAR1 family [IPR031052] (2); Zinc finger, PMZ-type [IPR006564] (2); Zinc finger, SWIM-type [IPR007527] (2)                                                                                                                                                                                                                                                                                                                                                                                                                                                                                                                                                                                          | scaffold_7_mRNA_1629.1             | C.unshiu_00352_mRNA_18.1     | -                               |
| GF0023563 | 1                               | 1                         | 0                            | Hypothetical protein (2)                                                                | zinc ion binding [GO:0008270 molecular_function] (2); nucleic acid binding [GO:0003676 molecular_function] (2)                                                                                                                                                                                                                                             | Domain of unknown function DUF4283 [IPR025558] (2); Endonuclease/exonuclease/phosphatase [IPR00135] (2); Zinc knuckle CXXCXXHXK [IPR025836] (2); Zinc finger, CCHC-type [IPR001876] (2); Ribonuclease H-like domain [IPR012337] (1); Reverse transcriptase zinc-binding domain [IPR026960] (1)                                                                                                                                                                                                                                                                                                                                                                                                           | scaffold_7_mRNA_1590.1             | C.unshiu_00404_mRNA_8.1      | -                               |
| GF0023562 | 1                               | 1                         | 0                            | Hypothetical protein (2)                                                                |                                                                                                                                                                                                                                                                                                                                                            |                                                                                                                                                                                                                                                                                                                                                                                                                                                                                                                                                                                                                                                                                                          | scaffold_7_mRNA_1578.1             | C.unshiu_00404_mRNA_20.1     | -                               |
| GF0023561 | 1                               | 1                         | 0                            | Hypothetical protein (2)                                                                | nucleic acid binding [GO:0003676 molecular_function] (2); zinc ion binding [GO:0008270 molecular_function] (1)                                                                                                                                                                                                                                             | Reverse transcriptase zinc-binding domain [IPR026960] (2); Endonuclease/exonuclease/phosphatase [IPR00135] (2); Domain of unknown function DUF4283 [IPR025558] (1); Ribonuclease H-like domain [IPR012337] (2); Zinc finger, CCHC-type [IPR001876] (1)                                                                                                                                                                                                                                                                                                                                                                                                                                                   | scaffold_7_mRNA_1569.1             | C.unshiu_01362_mRNA_6.1      | -                               |
| GF0023559 | 1                               | 1                         | 0                            | Hypothetical protein (2)                                                                |                                                                                                                                                                                                                                                                                                                                                            |                                                                                                                                                                                                                                                                                                                                                                                                                                                                                                                                                                                                                                                                                                          | scaffold_7_mRNA_1544.1             | C.unshiu_01309_mRNA_11.1     | -                               |
| GF0023555 | 1                               | 1                         | 0                            | Hypothetical protein (2)                                                                |                                                                                                                                                                                                                                                                                                                                                            |                                                                                                                                                                                                                                                                                                                                                                                                                                                                                                                                                                                                                                                                                                          | scaffold_7_mRNA_1525.1             | C.unshiu_02525_mRNA_3.1      | -                               |
| GF0023554 | 1                               | 1                         | 0                            | Disease resistance protein (2)                                                          | ADP binding [GO:0043531 molecular_function] (2); protein binding [GO:0005515 molecular_function] (1)                                                                                                                                                                                                                                                       | Leucine-rich repeat domain, L domain-like [IPR032675] (2); P-loop containing nucleoside triphosphate hydrolase [IPR027417] (2); NB-ARC [IPR002182] (2); A-A-A-ATPase domain [IPR003591] (1); Leucine-rich repeat [IPR001611] (1)                                                                                                                                                                                                                                                                                                                                                                                                                                                                         | scaffold_7_mRNA_1517.1             | C.unshiu_00451_mRNA_8.1      | -                               |
| GF0023551 | 1                               | 1                         | 0                            | Hypothetical protein (2)                                                                |                                                                                                                                                                                                                                                                                                                                                            |                                                                                                                                                                                                                                                                                                                                                                                                                                                                                                                                                                                                                                                                                                          | scaffold_7_mRNA_1506.1             | C.unshiu_00451_mRNA_19.1     | -                               |
| GF0023550 | 1                               | 1                         | 0                            | Hypothetical protein (2)                                                                |                                                                                                                                                                                                                                                                                                                                                            |                                                                                                                                                                                                                                                                                                                                                                                                                                                                                                                                                                                                                                                                                                          | scaffold_7_mRNA_1493.1             | C.unshiu_01150_mRNA_4.1      | -                               |
| GF0023549 | 1                               | 1                         | 0                            | Boron transporter (2)                                                                   | anion transport [GO:0006820 biological_process] (2); membrane [GO:0016020 cellular_component] (2); inorganic anion exchanger activity [GO:0005452 molecular_function] (2); integral component of membrane [GO:0016021 cellular_component] (2)                                                                                                              | Bicarbonate transporter, C-terminal [IPR011531] (2); Bicarbonate transporter, eukaryotic [IPR003020] (2)                                                                                                                                                                                                                                                                                                                                                                                                                                                                                                                                                                                                 | scaffold_7_mRNA_1491.1             | C.unshiu_01150_mRNA_2.1      | -                               |
| GF0023548 | 1                               | 1                         | 0                            | ECA1 gametogenesis related family (1); Egg cell-secreted protein 1.4 (1)                |                                                                                                                                                                                                                                                                                                                                                            |                                                                                                                                                                                                                                                                                                                                                                                                                                                                                                                                                                                                                                                                                                          | scaffold_7_mRNA_1484.1             | C.unshiu_01754_mRNA_3.1      | -                               |
| GF0023546 | 1                               | 1                         | 0                            | Disease resistance protein RPS2 (1); Disease resistance protein (1)                     | ADP binding [GO:0043531 molecular_function] (2)                                                                                                                                                                                                                                                                                                            | Leucine-rich repeat domain, L domain-like [IPR032675] (2); P-loop containing nucleoside triphosphate hydrolase [IPR027417] (2); NB-ARC [IPR002182] (2); Alpha-beta hydrolase fold [IPR029058] (1); Winged helix-turn-helix DNA-binding domain [IPR011991] (1)                                                                                                                                                                                                                                                                                                                                                                                                                                            | scaffold_7_mRNA_1469.1             | C.unshiu_00989_mRNA_16.1     | -                               |
| GF0023545 | 1                               | 1                         | 0                            | Molybdate transporter 1-like protein (2)                                                | molybdate ion transport [GO:0015689 biological_process] (2); molybdate ion transmembrane transporter activity [GO:0016098 molecular_function] (2); integral component of membrane [GO:0016021 cellular_component] (1)                                                                                                                                      | Molybdate transporter 1/2 [IPR031563] (2); Molybdate transporter 1, plant [IPR030161] (1)                                                                                                                                                                                                                                                                                                                                                                                                                                                                                                                                                                                                                | scaffold_7_mRNA_1453.1             | C.unshiu_00924_mRNA_2.1      | -                               |
| GF0023544 | 1                               | 1                         | 0                            | Hypothetical protein (2)                                                                |                                                                                                                                                                                                                                                                                                                                                            |                                                                                                                                                                                                                                                                                                                                                                                                                                                                                                                                                                                                                                                                                                          | scaffold_7_mRNA_1439.1             | C.unshiu_00975_mRNA_1.1      | -                               |
| GF0023542 | 1                               | 1                         | 0                            | Hypothetical protein (2)                                                                | polysaccharide binding [GO:0030247 molecular_function] (2)                                                                                                                                                                                                                                                                                                 | Wall-associated receptor kinase, galacturonan-binding domain [IPR025287] (2)                                                                                                                                                                                                                                                                                                                                                                                                                                                                                                                                                                                                                             | scaffold_7_mRNA_1417.1             | C.unshiu_00165_mRNA_16.1     | -                               |
| GF0023541 | 1                               | 1                         | 0                            | Auxin-induced protein IAA6 (2)                                                          | protein binding [GO:0005515 molecular_function] (2); regulation of transcription, DNA-templated [GO:0006355 biological_process] (2); nucleus [GO:0005634 cellular_component] (2)                                                                                                                                                                           | PB1 domain [IPR000270] (2); AUX/IAA protein [IPR003311] (2); AUX/IAA domain [IPR033389] (1)                                                                                                                                                                                                                                                                                                                                                                                                                                                                                                                                                                                                              | scaffold_7_mRNA_1403.1             | C.unshiu_00496_mRNA_5.1      | -                               |
| GF0023539 | 1                               | 1                         | 0                            | Putative glycosyltransferase yplH (2)                                                   |                                                                                                                                                                                                                                                                                                                                                            |                                                                                                                                                                                                                                                                                                                                                                                                                                                                                                                                                                                                                                                                                                          | scaffold_7_mRNA_1388.1             | C.unshiu_00496_mRNA_19.1     | -                               |
| GF0023538 | 1                               | 1                         | 0                            | LRR receptor-like kinase family protein (2)                                             | protein binding [GO:0005515 molecular_function] (2); ATP binding [GO:000524 molecular_function] (2); protein phosphorylation [GO:0006468 biological_process] (2); protein kinase activity [GO:0004672 molecular_function] (2)                                                                                                                              | Glycosyl transferase, family 1 [IPR001296] (2); Protein kinase-like domain [IPR011009] (2); Leucine-rich repeat domain, L domain-like [IPR032675] (2); Protein kinase domain [IPR000719] (2); Leucine-rich repeat [IPR001611] (2); Serine/threonine-protein kinase, active site [IPR008271] (2); Protein kinase, ATP binding site [IPR017441] (2); Leucine-rich repeat-containing N-terminal, plant-type [IPR013210] (2); Leucine-rich repeat, typical subtype [IPR003591] (1); Concavalin A-like lectin glucanase domain [IPR013320] (1); Serine/threonine/tyrosine-protein kinase catalytic domain [IPR001245] (1); Serine/threonine/dual specificity protein kinase, catalytic domain [IPR002290] (1) | scaffold_7_mRNA_1383.1             | C.unshiu_00372_mRNA_5.1      | -                               |
| GF0023537 | 1                               | 1                         | 0                            | Hypothetical protein (2)                                                                |                                                                                                                                                                                                                                                                                                                                                            |                                                                                                                                                                                                                                                                                                                                                                                                                                                                                                                                                                                                                                                                                                          | scaffold_7_mRNA_1382.1             | C.unshiu_01453_mRNA_4.1      | -                               |
| GF0023536 | 1                               | 1                         | 0                            | LRR receptor-like kinase family protein (2)                                             | protein binding [GO:0005515 molecular_function] (2); protein kinase activity [GO:0004672 molecular_function] (2); protein phosphorylation [GO:0006468 biological_process] (2); ATP binding [GO:000524 molecular_function] (2)                                                                                                                              | Leucine-rich repeat domain, L domain-like [IPR032675] (2); Protein kinase-like domain [IPR011009] (2); Leucine-rich repeat, typical subtype [IPR003591] (2); Protein kinase domain [IPR000719] (2); Leucine-rich repeat [IPR001611] (2); Serine/threonine-protein kinase, active site [IPR008271] (2); Protein kinase, ATP binding site [IPR017441] (2); Concavalin A-like lectin glucanase domain [IPR013320] (1); Leucine-rich repeat-containing N-terminal, plant-type [IPR013210] (1); Serine/threonine/tyrosine-protein kinase, catalytic domain [IPR001245] (1); Serine/threonine/dual specificity protein kinase, catalytic domain [IPR002290] (1)                                                | scaffold_7_mRNA_1374.1             | C.unshiu_00982_mRNA_7.1      | -                               |
| GF0023535 | 1                               | 1                         | 0                            | Hypothetical protein (2)                                                                |                                                                                                                                                                                                                                                                                                                                                            |                                                                                                                                                                                                                                                                                                                                                                                                                                                                                                                                                                                                                                                                                                          | scaffold_7_mRNA_1372.1             | C.unshiu_01521_mRNA_8.1      | -                               |
| GF0023534 | 1                               | 1                         | 0                            | Hypothetical protein (2)                                                                |                                                                                                                                                                                                                                                                                                                                                            |                                                                                                                                                                                                                                                                                                                                                                                                                                                                                                                                                                                                                                                                                                          | scaffold_7_mRNA_1367.1             | C.unshiu_02144_mRNA_2.1      | -                               |
| GF0023533 | 1                               | 1                         | 0                            | Hypothetical protein (2)                                                                |                                                                                                                                                                                                                                                                                                                                                            |                                                                                                                                                                                                                                                                                                                                                                                                                                                                                                                                                                                                                                                                                                          | scaffold_7_mRNA_1364.1             | C.unshiu_00982_mRNA_2.1      | -                               |
| GF0023532 | 1                               | 1                         | 0                            | RNA-dependent RNA polymerase 1c (2)                                                     | RNA-directed RNA polymerase activity [GO:0003968 molecular_function] (1); RNA-directed 5'-3' RNA polymerase activity [GO:0003968 molecular_function] (1)                                                                                                                                                                                                   | RNA-dependent RNA polymerase, eukaryotic-type [IPR007855] (2)                                                                                                                                                                                                                                                                                                                                                                                                                                                                                                                                                                                                                                            | scaffold_7_mRNA_1361.1             | C.unshiu_00595_mRNA_26.1     | -                               |
| GF0023530 | 1                               | 1                         | 0                            | FAD-binding Berberine family protein (2)                                                | oxidoreductase activity [GO:0016491 molecular_function] (2); oxidation-reduction process [GO:005114 biological_process] (2); flavin adenine dinucleotide binding [GO:0050660 molecular_function] (2); catalytic activity [GO:0003824 molecular_function] (2); oxidoreductase activity, acting on CH-OH group of donors [GO:0016614 molecular_function] (2) | Berberine/berberine-like [IPR012951] (2); FAD-binding, type 2, subdomain 1 [IPR016177] (2); CO dehydrogenase flavoprotein-like, FAD-binding, subdomain 2 [IPR016169] (2); FAD linked oxidase, N-terminal [IPR006094] (2); FAD-binding, type 2 [IPR016166] (2)                                                                                                                                                                                                                                                                                                                                                                                                                                            | scaffold_7_mRNA_1358.1             | C.unshiu_00595_mRNA_28.1     | -                               |
| GF0023529 | 1                               | 1                         | 0                            | Hypothetical protein (2)                                                                |                                                                                                                                                                                                                                                                                                                                                            |                                                                                                                                                                                                                                                                                                                                                                                                                                                                                                                                                                                                                                                                                                          | scaffold_7_mRNA_1357.1             | C.unshiu_00595_mRNA_29.1     | -                               |
| GF0023528 | 1                               | 1                         | 0                            | Hypothetical protein (2)                                                                |                                                                                                                                                                                                                                                                                                                                                            |                                                                                                                                                                                                                                                                                                                                                                                                                                                                                                                                                                                                                                                                                                          | scaffold_7_mRNA_1358.1             | C.unshiu_01983_mRNA_2.1      | -                               |
| GF0023526 | 1                               | 1                         | 0                            | Hypothetical protein (2)                                                                |                                                                                                                                                                                                                                                                                                                                                            |                                                                                                                                                                                                                                                                                                                                                                                                                                                                                                                                                                                                                                                                                                          | scaffold_7_mRNA_1317.1             | C.unshiu_00269_mRNA_33.1     | -                               |
| GF0023525 | 1                               | 1                         | 0                            | Hypothetical protein (1); Mitochondrial-processing peptidase subunit alpha (1)          | catalytic activity [GO:0003824 molecular_function] (1); metal ion binding [GO:0046872 molecular_function] (1)                                                                                                                                                                                                                                              | Peptidase M16 domain [IPR011237] (1); Metalloenzyme, Lys/S/M16 peptidase-like [IPR011249] (1)                                                                                                                                                                                                                                                                                                                                                                                                                                                                                                                                                                                                            | scaffold_7_mRNA_1311.1             | C.unshiu_01958_mRNA_4.1      | -                               |
| GF0023524 | 1                               | 1                         | 0                            | Hypothetical protein (2)                                                                |                                                                                                                                                                                                                                                                                                                                                            |                                                                                                                                                                                                                                                                                                                                                                                                                                                                                                                                                                                                                                                                                                          | scaffold_7_mRNA_1310.1             | C.unshiu_01958_mRNA_3.1      | -                               |
| GF0023523 | 1                               | 1                         | 0                            | Hypothetical protein (1); Transposon protein, putative, unclassified, expressed (1)     | regulation of transcription, DNA-templated [GO:0006355 biological_process] (2)                                                                                                                                                                                                                                                                             | FHY3/FAR1 family [IPR031052] (2); MULE transposase domain [IPR018289] (2); FARI DNA binding domain [IPR040330] (1)                                                                                                                                                                                                                                                                                                                                                                                                                                                                                                                                                                                       | scaffold_7_mRNA_1307.1             | C.unshiu_00530_mRNA_3.1      | -                               |
| GF0023522 | 1                               | 1                         | 0                            | Hypothetical protein (2)                                                                |                                                                                                                                                                                                                                                                                                                                                            |                                                                                                                                                                                                                                                                                                                                                                                                                                                                                                                                                                                                                                                                                                          | scaffold_7_mRNA_1306.1             | C.unshiu_00004_mRNA_160.1    | -                               |
| GF0023521 | 1                               | 1                         | 0                            | Hypothetical protein (2)                                                                |                                                                                                                                                                                                                                                                                                                                                            |                                                                                                                                                                                                                                                                                                                                                                                                                                                                                                                                                                                                                                                                                                          | scaffold_7_mRNA_1273.1             | C.unshiu_00221_mRNA_44.1     | -                               |





| ID        | Num. in <i>C. caryotactis</i> | Num. in <i>C. acutis</i> | Num. in <i>P. trifoliate</i> | Note                                                                                             | GO                                                                                                                                                                                                                                                                                                                                                                                                                                                                                                   | InterPro                                                                                                                                                                                                                                                                                                                                                                                                                                                                                                                                | Members in <i>C. caryotactis</i> | Members in <i>C. acutis</i> | Members in <i>P. trifoliate</i> |
|-----------|-------------------------------|--------------------------|------------------------------|--------------------------------------------------------------------------------------------------|------------------------------------------------------------------------------------------------------------------------------------------------------------------------------------------------------------------------------------------------------------------------------------------------------------------------------------------------------------------------------------------------------------------------------------------------------------------------------------------------------|-----------------------------------------------------------------------------------------------------------------------------------------------------------------------------------------------------------------------------------------------------------------------------------------------------------------------------------------------------------------------------------------------------------------------------------------------------------------------------------------------------------------------------------------|----------------------------------|-----------------------------|---------------------------------|
| GF0023349 | 1                             | 1                        | 0                            | Hypothetical protein (2)                                                                         | glucose metabolic process [GO:0006006 biological_process] (2); oxidation-reduction process [GO:0055114 biological_process] (2); glucose-6-phosphate dehydrogenase activity [GO:0004345 molecular_function] (2); NADP binding [GO:0050661 molecular_function] (2)                                                                                                                                                                                                                                     | Glucose-6-phosphate dehydrogenase [IPRO1282] (2); Glucose-6-phosphate dehydrogenase, C-terminal [IPRO22675] (2)                                                                                                                                                                                                                                                                                                                                                                                                                         | scaffold_6_mRNA_31.1             | C_unshiu_00464_mRNA_13.1    | -                               |
| GF0023348 | 1                             | 1                        | 0                            | Hypothetical protein (1); PLATZ transcription factor family protein (1)                          |                                                                                                                                                                                                                                                                                                                                                                                                                                                                                                      | Protein of unknown function DUF597 [IPRO06734] (2)                                                                                                                                                                                                                                                                                                                                                                                                                                                                                      | scaffold_6_mRNA_309.1            | C_unshiu_01082_mRNA_4.1     | -                               |
| GF0023346 | 1                             | 1                        | 0                            | Hypothetical protein (2)                                                                         |                                                                                                                                                                                                                                                                                                                                                                                                                                                                                                      | Domain unknown function DUF295 [IPRO05174] (1)                                                                                                                                                                                                                                                                                                                                                                                                                                                                                          | scaffold_6_mRNA_307.1            | C_unshiu_01082_mRNA_6.1     | -                               |
| GF0023345 | 1                             | 1                        | 0                            | Hypothetical protein (2)                                                                         |                                                                                                                                                                                                                                                                                                                                                                                                                                                                                                      | Serine/threonine-protein kinase, active site [IPRO08271] (2); Protein kinase, ATP binding site [IPRO17441] (2); Protein kinase-like domain [IPRO11009] (2); Protein kinase domain [IPRO00719] (2); Serine/threonine/tyrosine-protein kinase catalytic domain [IPRO01245] (1); Serine/threonine/tyrosine-protein kinase, catalytic domain [IPRO1245] (1); Concavalin A-like lectin/glucanase domain [IPRO13320] (1)                                                                                                                      | scaffold_6_mRNA_306.1            | C_unshiu_00654_mRNA_6.1     | -                               |
| GF0023344 | 1                             | 1                        | 0                            | Protein kinase APK1A (2)                                                                         | ATP binding [GO:0005524 molecular_function] (2); protein phosphorylation [GO:0006468 biological_process] (2); protein kinase activity [GO:0004672 molecular_function] (2)                                                                                                                                                                                                                                                                                                                            | Protein kinase-like domain [IPRO11009] (2); Serine/threonine/tyrosine-protein kinase catalytic domain [IPRO01245] (1); Serine/threonine/tyrosine-protein kinase, catalytic domain [IPRO1245] (1); Concavalin A-like lectin/glucanase domain [IPRO13320] (1)                                                                                                                                                                                                                                                                             | scaffold_6_mRNA_305.1            | C_unshiu_00135_mRNA_16.1    | -                               |
| GF0023342 | 1                             | 1                        | 0                            | Caffeic acid O-methyltransferase (2)                                                             | O-methyltransferase activity [GO:0008171 molecular_function] (2); protein dimerization activity [GO:0046983 molecular_function] (2); methyltransferase activity [GO:0006168 molecular_function] (2)                                                                                                                                                                                                                                                                                                  | O-methyltransferase, family 2 [IPRO1077] (2); Winged helix-turn-helix DNA-binding domain [IPRO11991] (2); O-methyltransferase COMT-type [IPRO14641] (2); Plant methyltransferase dimerization [IPRO2967] (2); S-adenosyl-L-methionine-dependent methyltransferase [IPRO29063] (2)                                                                                                                                                                                                                                                       | scaffold_6_mRNA_304.1            | C_unshiu_02673_mRNA_2.1     | -                               |
| GF0023341 | 1                             | 1                        | 0                            | Polypyridyl alcohol dehydrogenase-like protein (2)                                               |                                                                                                                                                                                                                                                                                                                                                                                                                                                                                                      | Pyrolo-quinoline quinone beta-propeller repeat [IPRO1391] (2); Quinoprotein alcohol dehydrogenase-like superfamily [IPRO11047] (2); Pyrolo-quinoline quinone repeat [IPRO2372] (2); Quinoprotein alcohol dehydrogenase-like domain [IPRO27295] (1)                                                                                                                                                                                                                                                                                      | scaffold_6_mRNA_303.1            | C_unshiu_00135_mRNA_40.1    | -                               |
| GF0023339 | 1                             | 1                        | 0                            | Hypothetical protein (1); Spo11-3/RM2/Bias5/Top6A3 vegetative topoisomerase VIA (1)              | DNA binding [GO:0003677 molecular_function] (2); chromosome [GO:0005694 cellular_component] (2); DNA catabolic process, endonucleolytic [GO:000737 biological_process] (2); DNA topoisomerase type II (ATP-hydrolyzing) activity [GO:0003918 molecular_function] (1); DNA metabolic process [GO:0006259 biological_process] (1); DNA topological change [GO:0006055 biological_process] (1); ATP binding [GO:0005524 molecular_function] (1); catalytic activity [GO:0003524 molecular_function] (1) | Spo11/DNA topoisomerase VI subunit A [IPRO2815] (2); Winged helix-turn-helix DNA-binding domain [IPRO11991] (1); Topoisomerase 6 subunit A/Spo11, TOPRIM domain [IPRO34136] (1); Spo11/DNA topoisomerase VI subunit A, N-terminal [IPRO13049] (1); DNA topoisomerase VI subunit A [IPRO40085] (1)                                                                                                                                                                                                                                       | scaffold_6_mRNA_301.6            | C_unshiu_00135_mRNA_54.1    | -                               |
| GF0023338 | 1                             | 1                        | 0                            | Putative mitochondrial chaperone BCS1B (2)                                                       | ATP binding [GO:0005524 molecular_function] (2)                                                                                                                                                                                                                                                                                                                                                                                                                                                      | ATPase, AAA-type, conserved site [IPRO03960] (2); ATPase, AAA-type, core [IPRO03959] (2); P-loop containing nucleoside triphosphate hydrolase [IPRO27417] (2); AAA-type ATPase, N-terminal domain [IPRO25753] (2); AAA+ ATPase domain [IPRO03593] (2)                                                                                                                                                                                                                                                                                   | scaffold_6_mRNA_300.1            | C_unshiu_00420_mRNA_11.1    | -                               |
| GF0023332 | 1                             | 1                        | 0                            | Hypothetical protein (2)                                                                         |                                                                                                                                                                                                                                                                                                                                                                                                                                                                                                      | Leucine-rich repeat domain, L domain-like [IPRO32675] (1); FBD domain [IPRO06566] (1)                                                                                                                                                                                                                                                                                                                                                                                                                                                   | scaffold_6_mRNA_297.1            | C_unshiu_00133_mRNA_46.1    | -                               |
| GF0023329 | 1                             | 1                        | 0                            | Hypothetical protein (2)                                                                         |                                                                                                                                                                                                                                                                                                                                                                                                                                                                                                      | Alpha/Beta hydrolase fold [IPRO29058] (2); Alpha/beta hydrolase fold-5 [IPRO29059] (1); Serine aminopeptidase S33 [IPRO2742] (1)                                                                                                                                                                                                                                                                                                                                                                                                        | scaffold_6_mRNA_295.1            | C_unshiu_00133_mRNA_29.1    | -                               |
| GF0023327 | 1                             | 1                        | 0                            | Hypothetical protein (2)                                                                         |                                                                                                                                                                                                                                                                                                                                                                                                                                                                                                      | GHS family [IPRO04993] (2)                                                                                                                                                                                                                                                                                                                                                                                                                                                                                                              | scaffold_6_mRNA_294.1            | C_unshiu_00178_mRNA_27.1    | -                               |
| GF0023326 | 1                             | 1                        | 0                            | Hypothetical protein (2)                                                                         |                                                                                                                                                                                                                                                                                                                                                                                                                                                                                                      | Protein kinase, ATP binding site [IPRO17441] (2); Protein kinase domain [IPRO00719] (2); Protein kinase-like domain [IPRO11009] (2); Maltin-like carbohydrate-binding domain [IPRO24788] (2); Serine/threonine-protein kinase, active site [IPRO08271] (1); Serine/threonine/tyrosine-protein kinase, catalytic domain [IPRO01245] (1); Serine/threonine/tyrosine-protein kinase catalytic domain [IPRO01245] (1); Tyrosine-protein kinase, catalytic domain [IPRO20655] (1); Concavalin A-like lectin/glucanase domain [IPRO13320] (1) | scaffold_6_mRNA_292.1            | C_unshiu_00253_mRNA_5.1     | -                               |
| GF0023325 | 1                             | 1                        | 0                            | Receptor-like protein kinase FERONIA (2)                                                         | protein phosphorylation [GO:0006468 biological_process] (2); protein kinase activity [GO:0004672 molecular_function] (2); ATP binding [GO:0005524 molecular_function] (2); protein tyrosine kinase activity [GO:0004713 molecular_function] (1)                                                                                                                                                                                                                                                      | NADH-ubiquinone reductase complex 1 MLCK subunit [IPRO10530] (2); Phosphatidylinositol-specific phospholipase C, X domain [IPRO09099] (2); PLC-like phospholipase, TM beta/alpha-barrel domain [IPRO17946] (2)                                                                                                                                                                                                                                                                                                                          | scaffold_6_mRNA_291.1            | C_unshiu_00253_mRNA_20.1    | -                               |
| GF0023324 | 1                             | 1                        | 0                            | PLC-like phospholipases superfamily protein (2)                                                  | phosphoric diester hydrolase activity [GO:0008081 molecular_function] (2); lipid metabolic process [GO:0006029 biological_process] (2)                                                                                                                                                                                                                                                                                                                                                               | Tetrapeptide-like helical domain [IPRO11990] (2); Pentatricopeptide repeat [IPRO23855] (2)                                                                                                                                                                                                                                                                                                                                                                                                                                              | scaffold_6_mRNA_289.1            | C_unshiu_00253_mRNA_37.1    | -                               |
| GF0023322 | 1                             | 1                        | 0                            | Pentatricopeptide (PPR) repeat protein (2)                                                       | protein binding [GO:0005515 molecular_function] (2)                                                                                                                                                                                                                                                                                                                                                                                                                                                  | S-adenosylmethionine decarboxylase [IPRO1985] (2); S-adenosylmethionine decarboxylase, conserved site [IPRO18166] (2); S-adenosylmethionine decarboxylase, core [IPRO16067] (2); S-adenosylmethionine decarboxylase subgroup [IPRO18167] (1)                                                                                                                                                                                                                                                                                            | scaffold_6_mRNA_287.1            | C_unshiu_00098_mRNA_50.1    | -                               |
| GF0023320 | 1                             | 1                        | 0                            | S-adenosylmethionine decarboxylase proenzyme (2)                                                 | spermine biosynthetic process [GO:0006597 biological_process] (2); spermidine biosynthetic process [GO:0008295 biological_process] (2); S-adenosylmethionine decarboxylase activity [GO:0004014 molecular_function] (2)                                                                                                                                                                                                                                                                              | Protein of unknown function DUF1262 [IPRO10683] (2)                                                                                                                                                                                                                                                                                                                                                                                                                                                                                     | scaffold_6_mRNA_286.1            | C_unshiu_00098_mRNA_45.1    | -                               |
| GF0023319 | 1                             | 1                        | 0                            | DUF1262 family protein (2)                                                                       |                                                                                                                                                                                                                                                                                                                                                                                                                                                                                                      | Reverse transcriptase zinc-binding domain [IPRO5960] (2); Ribonuclease H-like domain [IPRO12337] (2)                                                                                                                                                                                                                                                                                                                                                                                                                                    | scaffold_6_mRNA_284.1            | C_unshiu_00357_mRNA_6.1     | -                               |
| GF0023318 | 1                             | 1                        | 0                            | Non-LTR retroelement reverse transcriptase-like (1); Ribonuclease H-like superfamily protein (1) | nucleic acid binding [GO:0003676 molecular_function] (2)                                                                                                                                                                                                                                                                                                                                                                                                                                             | Protein of unknown function DUF2854 [IPRO21275] (2)                                                                                                                                                                                                                                                                                                                                                                                                                                                                                     | scaffold_6_mRNA_282.1            | C_unshiu_00098_mRNA_18.1    | -                               |
| GF0023317 | 1                             | 1                        | 0                            | Acclimation to photosynthesis to environment (2)                                                 |                                                                                                                                                                                                                                                                                                                                                                                                                                                                                                      | AWP19-like [IPRO08390] (2)                                                                                                                                                                                                                                                                                                                                                                                                                                                                                                              | scaffold_6_mRNA_283.1            | C_unshiu_00098_mRNA_14.1    | -                               |
| GF0023316 | 1                             | 1                        | 0                            | Plasma membrane associated protein (1); ABA induced plasma membrane protein (1)                  |                                                                                                                                                                                                                                                                                                                                                                                                                                                                                                      | Protein of unknown function DUF4281 [IPRO25461] (1); ABA DEFICIENT 4-like [IPRO25461] (1)                                                                                                                                                                                                                                                                                                                                                                                                                                               | scaffold_6_mRNA_281.1            | C_unshiu_00537_mRNA_16.1    | -                               |
| GF0023314 | 1                             | 1                        | 0                            | Neoxanthin synthase (2)                                                                          | flavin adenine dinucleotide binding [GO:0005660 molecular_function] (2); oxidoreductase activity [GO:0016491 molecular_function] (2); oxidation-reduction process [GO:0055114 biological_process] (2); UDP-N-acetylmuramic dehydrogenase activity [GO:0008762 molecular_function] (2); oxidoreductase activity, acting on CH-OH group of donors [GO:0016614 molecular_function] (2); catalytic activity [GO:0003824 molecular_function] (2)                                                          | UDP-N-acetylenolpyruvylglucosamine reductase [IPRO03170] (2); UDP-N-acetylenolpyruvylglucosamine reductase, C-terminal [IPRO11601] (2); FAD linked oxidase, N-terminal [IPRO0694] (2); FAD-binding, type 2, subdomain 1 [IPRO16167] (2); CO dehydrogenase flavoprotein-like, FAD-binding, subdomain 2 [IPRO16169] (2)                                                                                                                                                                                                                   | scaffold_6_mRNA_281.6            | C_unshiu_00537_mRNA_15.1    | -                               |
| GF0023312 | 1                             | 1                        | 0                            | Alpha/beta hydrolase family protein (2)                                                          |                                                                                                                                                                                                                                                                                                                                                                                                                                                                                                      | Alpha/Beta hydrolase fold [IPRO29058] (2); Alpha/beta hydrolase fold-1 [IPRO0073] (2)                                                                                                                                                                                                                                                                                                                                                                                                                                                   | scaffold_6_mRNA_281.1            | C_unshiu_00360_mRNA_15.1    | -                               |
| GF0023311 | 1                             | 1                        | 0                            | Hypothetical protein (2)                                                                         |                                                                                                                                                                                                                                                                                                                                                                                                                                                                                                      | Zinc finger, CCCH-type [IPRO00571] (2)                                                                                                                                                                                                                                                                                                                                                                                                                                                                                                  | scaffold_6_mRNA_281.1            | C_unshiu_00866_mRNA_7.1     | -                               |
| GF0023309 | 1                             | 1                        | 0                            | Hypothetical protein (2)                                                                         |                                                                                                                                                                                                                                                                                                                                                                                                                                                                                                      | Protein of unknown function DUF4228, plant [IPRO25322] (2)                                                                                                                                                                                                                                                                                                                                                                                                                                                                              | scaffold_6_mRNA_278.1            | C_unshiu_00038_mRNA_73.1    | -                               |
| GF0023307 | 1                             | 1                        | 0                            | Zinc finger protein, putative (1); Zinc finger CCCH domain-containing protein 39 (1)             | metal ion binding [GO:0046872 molecular_function] (2)                                                                                                                                                                                                                                                                                                                                                                                                                                                | Ankyrin repeat-containing domain [IPRO20653] (2); Protein kinase-like domain [IPRO11009] (2); Ankyrin repeat [IPRO02110] (2); Protein kinase domain [IPRO00719] (2); Serine/threonine/tyrosine-protein kinase catalytic domain [IPRO01245] (1); Ferritin-related [IPRO12347] (1); Serine/threonine/tyrosine-protein kinase, catalytic domain [IPRO01245] (1)                                                                                                                                                                            | scaffold_6_mRNA_276.1            | C_unshiu_00038_mRNA_58.1    | -                               |
| GF0023306 | 1                             | 1                        | 0                            | DUF4228 domain protein (2)                                                                       |                                                                                                                                                                                                                                                                                                                                                                                                                                                                                                      | Ubiquitin fusion degradation protein UFD1 [IPRO48454] (2)                                                                                                                                                                                                                                                                                                                                                                                                                                                                               | scaffold_6_mRNA_275.1            | C_unshiu_00038_mRNA_31.1    | -                               |
| GF0023305 | 1                             | 1                        | 0                            | Integrin-linked protein kinase family isoform 1 (2)                                              | protein binding [GO:0005515 molecular_function] (2); ATP binding [GO:0005524 molecular_function] (2); protein kinase activity [GO:0004672 molecular_function] (2); protein phosphorylation [GO:0006468 biological_process] (2)                                                                                                                                                                                                                                                                       | Myo-type, basic helix-loop-helix (SHLH) domain [IPRO11598] (2)                                                                                                                                                                                                                                                                                                                                                                                                                                                                          | scaffold_6_mRNA_271.1            | C_unshiu_00038_mRNA_13.1    | -                               |
| GF0023303 | 1                             | 1                        | 0                            | Ubiquitin fusion degradation protein (2)                                                         | ubiquitin-dependent protein catabolic process [GO:0006511 biological_process] (2)                                                                                                                                                                                                                                                                                                                                                                                                                    |                                                                                                                                                                                                                                                                                                                                                                                                                                                                                                                                         | scaffold_6_mRNA_270.1            | C_unshiu_00038_mRNA_6.1     | -                               |
| GF0023302 | 1                             | 1                        | 0                            | Transcription factor DYSFUNCTIONAL TAPETUM 1 (2)                                                 | Transcription factor activity [GO:0046983 molecular_function] (2)                                                                                                                                                                                                                                                                                                                                                                                                                                    |                                                                                                                                                                                                                                                                                                                                                                                                                                                                                                                                         |                                  |                             |                                 |
| GF0023301 | 1                             | 1                        | 0                            | Hypothetical protein (2)                                                                         |                                                                                                                                                                                                                                                                                                                                                                                                                                                                                                      |                                                                                                                                                                                                                                                                                                                                                                                                                                                                                                                                         |                                  |                             |                                 |





| ID        | Num. in <i>C. clementinae</i> | Num. in <i>C. acutula</i> | Num. in <i>P. trifoliata</i> | Note                                                                                      | GO                                                                                                                                                                                                                                                                                                                                                                                                                                          | InterPro                                                                                                                                                                                                                                                                                                                                                                                                                                                                                                                                                                                         | Members in <i>C. clementinae</i> | Members in <i>C. acutula</i> | Members in <i>P. trifoliata</i> |
|-----------|-------------------------------|---------------------------|------------------------------|-------------------------------------------------------------------------------------------|---------------------------------------------------------------------------------------------------------------------------------------------------------------------------------------------------------------------------------------------------------------------------------------------------------------------------------------------------------------------------------------------------------------------------------------------|--------------------------------------------------------------------------------------------------------------------------------------------------------------------------------------------------------------------------------------------------------------------------------------------------------------------------------------------------------------------------------------------------------------------------------------------------------------------------------------------------------------------------------------------------------------------------------------------------|----------------------------------|------------------------------|---------------------------------|
| GF0023247 | 1                             | 1                         | 0                            | UDP-glucosyltransferase 71C4 (2)                                                          | transferase activity, transferring hexosyl groups [GO:0016758 molecular_function] (2); metabolic process [GO:0008152 biological_process] (2)                                                                                                                                                                                                                                                                                                | UDP-glucuronosyl-UDP-glucosyltransferase [IPRO02213] (2)                                                                                                                                                                                                                                                                                                                                                                                                                                                                                                                                         | scaffold_6_mRNA_2139.1           | C_unshiu_00248_mRNA_30.1     | -                               |
| GF0023244 | 1                             | 1                         | 0                            | Mitochondrial transcription termination factor family protein (2)                         | regulation of transcription, DNA-templated [GO:0006355 biological_process] (2); double-stranded DNA binding [GO:0003690 molecular_function] (2); mitochondrion [GO:0005739 cellular_component] (1)                                                                                                                                                                                                                                          | Mitochondrial transcription termination factor [IPRO03690] (1); Transcription termination factor, mitochondrial/chloroplast [IPRO03690] (1)                                                                                                                                                                                                                                                                                                                                                                                                                                                      | scaffold_6_mRNA_2123.1           | C_unshiu_00248_mRNA_12.1     | -                               |
| GF0023243 | 1                             | 1                         | 0                            | UPF0586 C9orf41-like protein (2)                                                          | -                                                                                                                                                                                                                                                                                                                                                                                                                                           | S-adenosyl-L-methionine-dependent methyltransferase [IPRO29065] (2); N2227-like [IPRO12901] (2)                                                                                                                                                                                                                                                                                                                                                                                                                                                                                                  | scaffold_6_mRNA_2116.1           | C_unshiu_00248_mRNA_4.1      | -                               |
| GF0023242 | 1                             | 1                         | 0                            | Hypothetical protein (2)                                                                  | transferase activity, transferring hexosyl groups [GO:0016758 molecular_function] (2); metabolic process [GO:0008152 biological_process] (2)                                                                                                                                                                                                                                                                                                | UDP-glucuronosyl-UDP-glucosyltransferase [IPRO02213] (2); Bifunctional inhibitor/put lipid transfer protein/sulfonamide helical domain [IPRO16140] (1)                                                                                                                                                                                                                                                                                                                                                                                                                                           | scaffold_6_mRNA_2115.1           | C_unshiu_00248_mRNA_2.1      | -                               |
| GF0023241 | 1                             | 1                         | 0                            | Hypothetical protein (2)                                                                  | -                                                                                                                                                                                                                                                                                                                                                                                                                                           | Agnet domain, plant type [IPRO14002] (2); Protein of unknown function DUF724 [IPRO07930] (2)                                                                                                                                                                                                                                                                                                                                                                                                                                                                                                     | scaffold_6_mRNA_2091.1           | C_unshiu_01587_mRNA_5.1      | -                               |
| GF0023240 | 1                             | 1                         | 0                            | Hypothetical protein (2)                                                                  | -                                                                                                                                                                                                                                                                                                                                                                                                                                           | -                                                                                                                                                                                                                                                                                                                                                                                                                                                                                                                                                                                                | scaffold_6_mRNA_2082.1           | C_unshiu_00865_mRNA_9.1      | -                               |
| GF0023238 | 1                             | 1                         | 0                            | Hypothetical protein (2)                                                                  | -                                                                                                                                                                                                                                                                                                                                                                                                                                           | -                                                                                                                                                                                                                                                                                                                                                                                                                                                                                                                                                                                                | scaffold_6_mRNA_208.1            | C_unshiu_01343_mRNA_13.1     | -                               |
| GF0023234 | 1                             | 1                         | 0                            | Long seven transmembrane receptor family protein, expressed (2)                           | integral component of membrane [GO:0016021 cellular_component] (2)                                                                                                                                                                                                                                                                                                                                                                          | Lung seven transmembrane receptor-like [IPRO09637] (2)                                                                                                                                                                                                                                                                                                                                                                                                                                                                                                                                           | scaffold_6_mRNA_2020.1           | C_unshiu_00090_mRNA_53.1     | -                               |
| GF0023231 | 1                             | 1                         | 0                            | Hypothetical protein (2)                                                                  | -                                                                                                                                                                                                                                                                                                                                                                                                                                           | -                                                                                                                                                                                                                                                                                                                                                                                                                                                                                                                                                                                                | scaffold_6_mRNA_200.1            | C_unshiu_00138_mRNA_69.1     | -                               |
| GF0023228 | 1                             | 1                         | 0                            | Hypothetical protein (2)                                                                  | -                                                                                                                                                                                                                                                                                                                                                                                                                                           | -                                                                                                                                                                                                                                                                                                                                                                                                                                                                                                                                                                                                | scaffold_6_mRNA_1975.1           | C_unshiu_00008_mRNA_111.1    | -                               |
| GF0023227 | 1                             | 1                         | 0                            | Hypothetical protein (2)                                                                  | -                                                                                                                                                                                                                                                                                                                                                                                                                                           | -                                                                                                                                                                                                                                                                                                                                                                                                                                                                                                                                                                                                | scaffold_6_mRNA_1970.1           | C_unshiu_00008_mRNA_105.1    | -                               |
| GF0023226 | 1                             | 1                         | 0                            | Hypothetical protein (2)                                                                  | -                                                                                                                                                                                                                                                                                                                                                                                                                                           | -                                                                                                                                                                                                                                                                                                                                                                                                                                                                                                                                                                                                | scaffold_6_mRNA_1971.1           | C_unshiu_00138_mRNA_67.1     | -                               |
| GF0023222 | 1                             | 1                         | 0                            | Hypothetical protein (2)                                                                  | -                                                                                                                                                                                                                                                                                                                                                                                                                                           | -                                                                                                                                                                                                                                                                                                                                                                                                                                                                                                                                                                                                | scaffold_6_mRNA_1947.1           | C_unshiu_00008_mRNA_86.1     | -                               |
| GF0023220 | 1                             | 1                         | 0                            | Hypothetical protein (2)                                                                  | -                                                                                                                                                                                                                                                                                                                                                                                                                                           | -                                                                                                                                                                                                                                                                                                                                                                                                                                                                                                                                                                                                | scaffold_6_mRNA_1940.1           | C_unshiu_00008_mRNA_82.1     | -                               |
| GF0023219 | 1                             | 1                         | 0                            | Hypothetical protein (2)                                                                  | -                                                                                                                                                                                                                                                                                                                                                                                                                                           | -                                                                                                                                                                                                                                                                                                                                                                                                                                                                                                                                                                                                | scaffold_6_mRNA_1939.1           | C_unshiu_00008_mRNA_81.1     | -                               |
| GF0023217 | 1                             | 1                         | 0                            | Hypothetical protein (2)                                                                  | -                                                                                                                                                                                                                                                                                                                                                                                                                                           | Endonuclease/exonuclease/phosphatase [IPRO0135] (2)                                                                                                                                                                                                                                                                                                                                                                                                                                                                                                                                              | scaffold_6_mRNA_1928.1           | C_unshiu_00008_mRNA_73.1     | -                               |
| GF0023216 | 1                             | 1                         | 0                            | Hypothetical protein (2)                                                                  | -                                                                                                                                                                                                                                                                                                                                                                                                                                           | Endonuclease/exonuclease/phosphatase [IPRO0135] (2)                                                                                                                                                                                                                                                                                                                                                                                                                                                                                                                                              | scaffold_6_mRNA_1927.1           | C_unshiu_00008_mRNA_72.1     | -                               |
| GF0023215 | 1                             | 1                         | 0                            | Hypothetical protein (2)                                                                  | -                                                                                                                                                                                                                                                                                                                                                                                                                                           | -                                                                                                                                                                                                                                                                                                                                                                                                                                                                                                                                                                                                | scaffold_6_mRNA_1907.1           | C_unshiu_00008_mRNA_54.1     | -                               |
| GF0023214 | 1                             | 1                         | 0                            | Nadix hydrolase 15, mitochondrial-like protein (1); Nadix hydrolase 15, mitochondrial (1) | hydrolase activity [GO:0016787 molecular_function] (2)                                                                                                                                                                                                                                                                                                                                                                                      | NUDX hydrolase domain [IPRO00086] (2); NUDIX hydrolase domain-like [IPRO15797] (2)                                                                                                                                                                                                                                                                                                                                                                                                                                                                                                               | scaffold_6_mRNA_1898.1           | C_unshiu_00008_mRNA_45.1     | -                               |
| GF0023213 | 1                             | 1                         | 0                            | Hypothetical protein (2)                                                                  | -                                                                                                                                                                                                                                                                                                                                                                                                                                           | -                                                                                                                                                                                                                                                                                                                                                                                                                                                                                                                                                                                                | scaffold_6_mRNA_1882.1           | C_unshiu_00008_mRNA_35.1     | -                               |
| GF0023212 | 1                             | 1                         | 0                            | Verticillium wilt resistance-like protein (2)                                             | protein binding [GO:0005515 molecular_function] (2); nucleic acid binding [GO:0000376 molecular_function] (1); zinc ion binding [GO:0008270 molecular_function] (1)                                                                                                                                                                                                                                                                         | Leucine-rich repeat [IPRO01611] (2); Leucine-rich repeat domain, L domain-like [IPRO32675] (2); Leucine-rich repeat, typical subtype [IPRO03591] (2); Zinc finger, CCHC-type [IPRO01878] (1)                                                                                                                                                                                                                                                                                                                                                                                                     | scaffold_6_mRNA_1881.1           | C_unshiu_00008_mRNA_34.1     | -                               |
| GF0023211 | 1                             | 1                         | 0                            | Pentapeptide repeat-containing protein, putative isoform 3 (2)                            | -                                                                                                                                                                                                                                                                                                                                                                                                                                           | -                                                                                                                                                                                                                                                                                                                                                                                                                                                                                                                                                                                                | scaffold_6_mRNA_1873.1           | C_unshiu_00008_mRNA_27.1     | -                               |
| GF0023210 | 1                             | 1                         | 0                            | Hypothetical protein (2)                                                                  | -                                                                                                                                                                                                                                                                                                                                                                                                                                           | -                                                                                                                                                                                                                                                                                                                                                                                                                                                                                                                                                                                                | scaffold_6_mRNA_1864.1           | C_unshiu_00008_mRNA_18.1     | -                               |
| GF0023208 | 1                             | 1                         | 0                            | Hypothetical protein (2)                                                                  | -                                                                                                                                                                                                                                                                                                                                                                                                                                           | -                                                                                                                                                                                                                                                                                                                                                                                                                                                                                                                                                                                                | scaffold_6_mRNA_1862.1           | C_unshiu_00157_mRNA_6.1      | -                               |
| GF0023205 | 1                             | 1                         | 0                            | Hypothetical protein (2)                                                                  | -                                                                                                                                                                                                                                                                                                                                                                                                                                           | -                                                                                                                                                                                                                                                                                                                                                                                                                                                                                                                                                                                                | scaffold_6_mRNA_1859.1           | C_unshiu_00008_mRNA_12.1     | -                               |
| GF0023203 | 1                             | 1                         | 0                            | Hypothetical protein (2)                                                                  | aminoacyl-tRNA ligase activity [GO:0004812 molecular_function] (2); lysine-tRNA ligase activity [GO:0004824 molecular_function] (2); lysyl-tRNA aminoacylation [GO:0006450 biological_process] (2); nucleotide binding [GO:0000166 molecular_function] (2); ATP binding [GO:0005524 molecular_function] (3); cytoplasm [GO:0005737 cellular_component] (2); tRNA aminoacylation for protein translation [GO:0006418 biological_process] (2) | Lysyl-tRNA synthetase, class II, C-terminal [IPRO18149] (2); Aminoacyl-tRNA synthetase, class II (D/K/N) [IPRO04364] (2); Aminoacyl-tRNA synthetase, class II (D/K/N)-like [IPRO18150] (1)                                                                                                                                                                                                                                                                                                                                                                                                       | scaffold_6_mRNA_1848.1           | C_unshiu_00008_mRNA_1.1      | -                               |
| GF0023202 | 1                             | 1                         | 0                            | Hypothetical protein (2)                                                                  | -                                                                                                                                                                                                                                                                                                                                                                                                                                           | -                                                                                                                                                                                                                                                                                                                                                                                                                                                                                                                                                                                                | scaffold_6_mRNA_1843.1           | C_unshiu_00217_mRNA_14.1     | -                               |
| GF0023201 | 1                             | 1                         | 0                            | SOS ribosomal protein L14, chloroplast (2)                                                | ribosome [GO:0005840 cellular_component] (2); translation [GO:0006412 biological_process] (2); structural constituent of ribosome [GO:0003735 molecular_function] (2)                                                                                                                                                                                                                                                                       | Ribosomal protein L14bL23c [IPRO00218] (1); Ribosomal protein L14 domain [IPRO23571] (1); Ribosomal protein L14P [IPRO00218] (1)                                                                                                                                                                                                                                                                                                                                                                                                                                                                 | scaffold_6_mRNA_1841.1           | C_unshiu_01554_mRNA_7.1      | -                               |
| GF0023200 | 1                             | 1                         | 0                            | Selenoprotein t (2)                                                                       | -                                                                                                                                                                                                                                                                                                                                                                                                                                           | Selenoprotein, Rds type [IPRO11893] (2); Threonine-like fold [IPRO12336] (2); Selenoprotein T [IPRO19389] (2)                                                                                                                                                                                                                                                                                                                                                                                                                                                                                    | scaffold_6_mRNA_1839.1           | C_unshiu_01554_mRNA_5.1      | -                               |
| GF0023199 | 1                             | 1                         | 0                            | Hypothetical protein (2)                                                                  | -                                                                                                                                                                                                                                                                                                                                                                                                                                           | -                                                                                                                                                                                                                                                                                                                                                                                                                                                                                                                                                                                                | scaffold_6_mRNA_1815.2           | C_unshiu_00332_mRNA_9.1      | -                               |
| GF0023198 | 1                             | 1                         | 0                            | Hypothetical protein (2)                                                                  | -                                                                                                                                                                                                                                                                                                                                                                                                                                           | -                                                                                                                                                                                                                                                                                                                                                                                                                                                                                                                                                                                                | scaffold_6_mRNA_1811.1           | C_unshiu_00332_mRNA_5.1      | -                               |
| GF0023197 | 1                             | 1                         | 0                            | Hypothetical protein (2)                                                                  | transmembrane transport [GO:0055085 biological_process] (1); integral component of membrane [GO:0016021 cellular_component] (1)                                                                                                                                                                                                                                                                                                             | Sodium/calcium exchanger membrane region [IPRO04837] (1)                                                                                                                                                                                                                                                                                                                                                                                                                                                                                                                                         | scaffold_6_mRNA_1806.1           | C_unshiu_00390_mRNA_4.1      | -                               |
| GF0023195 | 1                             | 1                         | 0                            | Disease resistance protein (2)                                                            | -                                                                                                                                                                                                                                                                                                                                                                                                                                           | Leucine-rich repeat domain, L domain-like [IPRO32675] (2); Receptor L-domain [IPRO0494] (1)                                                                                                                                                                                                                                                                                                                                                                                                                                                                                                      | scaffold_6_mRNA_181.1            | C_unshiu_01597_mRNA_3.1      | -                               |
| GF0023194 | 1                             | 1                         | 0                            | Hypothetical protein (2)                                                                  | nucleic acid binding [GO:0003676 molecular_function] (2)                                                                                                                                                                                                                                                                                                                                                                                    | Ribonuclease H-like domain [IPRO12337] (2); Protein kinase domain [IPRO00719] (2); Leucine-rich repeat domain, L domain-like [IPRO32675] (2); Protein kinase-like domain [IPRO11099] (2); Consensusvalin A-like lectin/glucanase domain [IPRO13320] (1); Serine/threonine/dual specificity protein kinase, catalytic domain [IPRO2290] (1); Serine-threonine/lysine-protein kinase, catalytic domain [IPRO01245] (1); Serine/threonine-protein kinase, active site [IPRO08271] (1); Leucine-rich repeat [IPRO01611] (1); Serine-threonine/lysine-protein kinase catalytic domain [IPRO01245] (1) | scaffold_6_mRNA_1795.1           | C_unshiu_00390_mRNA_16.1     | -                               |
| GF0023193 | 1                             | 1                         | 0                            | ILRR receptor-like kinase family protein (2)                                              | protein phosphorylation [GO:0006468 biological_process] (2); protein kinase activity [GO:0004672 molecular_function] (2); ATP binding [GO:0005524 molecular_function] (2); protein binding [GO:0005515 molecular_function] (1)                                                                                                                                                                                                              | -                                                                                                                                                                                                                                                                                                                                                                                                                                                                                                                                                                                                | scaffold_6_mRNA_1779.1           | C_unshiu_00473_mRNA_13.1     | -                               |
| GF0023190 | 1                             | 1                         | 0                            | Hypothetical protein (2)                                                                  | -                                                                                                                                                                                                                                                                                                                                                                                                                                           | -                                                                                                                                                                                                                                                                                                                                                                                                                                                                                                                                                                                                | scaffold_6_mRNA_1725.1           | C_unshiu_02528_mRNA_1.1      | -                               |
| GF0023189 | 1                             | 1                         | 0                            | Hypothetical protein (1); Ribonuclease H protein (1)                                      | nucleic acid binding [GO:0003676 molecular_function] (2)                                                                                                                                                                                                                                                                                                                                                                                    | Ribonuclease H-like domain [IPRO12337] (2); Reverse transcriptase zinc-binding domain [IPRO26960] (2)                                                                                                                                                                                                                                                                                                                                                                                                                                                                                            | scaffold_6_mRNA_1716.1           | C_unshiu_00034_mRNA_30.1     | -                               |
| GF0023188 | 1                             | 1                         | 0                            | Hypothetical protein (2)                                                                  | protein binding [GO:0005515 molecular_function] (2)                                                                                                                                                                                                                                                                                                                                                                                         | F-box domain [IPRO01810] (2)                                                                                                                                                                                                                                                                                                                                                                                                                                                                                                                                                                     | scaffold_6_mRNA_1711.1           | C_unshiu_00034_mRNA_36.1     | -                               |
| GF0023187 | 1                             | 1                         | 0                            | Hypothetical protein (2)                                                                  | protein binding [GO:0005515 molecular_function] (1)                                                                                                                                                                                                                                                                                                                                                                                         | WD40/YVTN repeat-like-containing domain [IPRO15943] (1)                                                                                                                                                                                                                                                                                                                                                                                                                                                                                                                                          | scaffold_6_mRNA_1710.1           | C_unshiu_00034_mRNA_37.1     | -                               |
| GF0023186 | 1                             | 1                         | 0                            | Hypothetical protein (2)                                                                  | -                                                                                                                                                                                                                                                                                                                                                                                                                                           | -                                                                                                                                                                                                                                                                                                                                                                                                                                                                                                                                                                                                | scaffold_6_mRNA_1708.1           | C_unshiu_00034_mRNA_39.1     | -                               |
| GF0023185 | 1                             | 1                         | 0                            | DNA double-strand break repair rad50 ATPase, putative isoform 2 (2)                       | -                                                                                                                                                                                                                                                                                                                                                                                                                                           | -                                                                                                                                                                                                                                                                                                                                                                                                                                                                                                                                                                                                | scaffold_6_mRNA_1684.1           | C_unshiu_00034_mRNA_58.1     | -                               |
| GF0023184 | 1                             | 1                         | 0                            | UDP-glucosyltransferase 85A7 (2)                                                          | transferase activity, transferring hexosyl groups [GO:0016758 molecular_function] (2); metabolic process [GO:0008152 biological_process] (2)                                                                                                                                                                                                                                                                                                | UDP-glucuronosyl-UDP-glucosyltransferase [IPRO02213] (2)                                                                                                                                                                                                                                                                                                                                                                                                                                                                                                                                         | scaffold_6_mRNA_1673.1           | C_unshiu_00034_mRNA_69.1     | -                               |
| GF0023183 | 1                             | 1                         | 0                            | Hypothetical protein (2)                                                                  | metabolic process [GO:0008152 biological_process] (1); transferase activity, transferring hexosyl groups [GO:0016758 molecular_function] (1)                                                                                                                                                                                                                                                                                                | UDP-glucuronosyl-UDP-glucosyltransferase [IPRO02213] (1)                                                                                                                                                                                                                                                                                                                                                                                                                                                                                                                                         | scaffold_6_mRNA_1672.1           | C_unshiu_00034_mRNA_70.1     | -                               |
| GF0023182 | 1                             | 1                         | 0                            | UDP-glucosyltransferase 85A7 (2)                                                          | transferase activity, transferring hexosyl groups [GO:0016758 molecular_function] (2)                                                                                                                                                                                                                                                                                                                                                       | UDP-glucuronosyl-UDP-glucosyltransferase [IPRO02213] (2)                                                                                                                                                                                                                                                                                                                                                                                                                                                                                                                                         | scaffold_6_mRNA_1671.1           | C_unshiu_00034_mRNA_71.1     | -                               |
| GF0023180 | 1                             | 1                         | 0                            | Hypothetical protein (2)                                                                  | -                                                                                                                                                                                                                                                                                                                                                                                                                                           | Domain of unknown function DUF4283 [IPRO25558] (2)                                                                                                                                                                                                                                                                                                                                                                                                                                                                                                                                               | scaffold_6_mRNA_1655.1           | C_unshiu_01358_mRNA_3.1      | -                               |
| GF0023179 | 1                             | 1                         | 0                            | Hypothetical protein (1); Non-LTR retroelement reverse transcriptase-like protein (1)     | -                                                                                                                                                                                                                                                                                                                                                                                                                                           | Reverse transcriptase zinc-binding domain [IPRO26960] (2)                                                                                                                                                                                                                                                                                                                                                                                                                                                                                                                                        | scaffold_6_mRNA_1651.1           | C_unshiu_00178_mRNA_15.1     | -                               |
| GF0023178 | 1                             | 1                         | 0                            | Hypothetical protein (2)                                                                  | -                                                                                                                                                                                                                                                                                                                                                                                                                                           | Bulb-type lectin domain [IPRO01480] (2); Protein kinase-like domain [IPRO11099] (1)                                                                                                                                                                                                                                                                                                                                                                                                                                                                                                              | scaffold_6_mRNA_1641.1           | C_unshiu_00178_mRNA_3.1      | -                               |
| GF0023177 | 1                             | 1                         | 0                            | Hypothetical protein (2)                                                                  | -                                                                                                                                                                                                                                                                                                                                                                                                                                           | -                                                                                                                                                                                                                                                                                                                                                                                                                                                                                                                                                                                                | scaffold_6_mRNA_1637.1           | C_unshiu_01603_mRNA_3.1      | -                               |
| GF0023176 | 1                             | 1                         | 0                            | Hypothetical protein (2)                                                                  | -                                                                                                                                                                                                                                                                                                                                                                                                                                           | Consensusvalin A-like lectin/glucanase domain [IPRO13320] (1)                                                                                                                                                                                                                                                                                                                                                                                                                                                                                                                                    | scaffold_6_mRNA_1636.1           | C_unshiu_01603_mRNA_2.1      | -                               |
| GF0023173 | 1                             | 1                         | 0                            | Hypothetical protein (2)                                                                  | -                                                                                                                                                                                                                                                                                                                                                                                                                                           | -                                                                                                                                                                                                                                                                                                                                                                                                                                                                                                                                                                                                | scaffold_6_mRNA_1616.1           | C_unshiu_00102_mRNA_38.1     | -                               |
| GF0023172 | 1                             | 1                         | 0                            | Hypothetical protein (2)                                                                  | -                                                                                                                                                                                                                                                                                                                                                                                                                                           | -                                                                                                                                                                                                                                                                                                                                                                                                                                                                                                                                                                                                | scaffold_6_mRNA_1615.1           | C_unshiu_00102_mRNA_37.1     | -                               |
| GF0023171 | 1                             | 1                         | 0                            | Aldo-keto reductase family 4 member C9 (2)                                                | oxidoreductase activity [GO:0016491 molecular_function] (2); oxidation-reduction process [GO:0055114 biological_process] (2)                                                                                                                                                                                                                                                                                                                | Aldo/keto reductase [IPRO20471] (2); Aldo/keto reductase, conserved site [IPRO18170] (2); NADP-dependent oxidoreductase domain [IPRO2310] (2); Aldo/keto reductase/potassium channel subunit beta [IPRO01395] (1)                                                                                                                                                                                                                                                                                                                                                                                | scaffold_6_mRNA_1613.1           | C_unshiu_00102_mRNA_28.1     | -                               |
| GF0023170 | 1                             | 1                         | 0                            | Aldo-keto reductase family 4 member C9 (2)                                                | oxidation-reduction process [GO:0055114 biological_process] (2); oxidoreductase activity [GO:0016491 molecular_function] (2)                                                                                                                                                                                                                                                                                                                | Aldo/keto reductase [IPRO20471] (2); Aldo/keto reductase, conserved site [IPRO18170] (2); NADP-dependent oxidoreductase domain [IPRO2310] (2); Aldo/keto reductase/potassium channel subunit beta [IPRO01395] (1)                                                                                                                                                                                                                                                                                                                                                                                | scaffold_6_mRNA_1607.1           | C_unshiu_00102_mRNA_21.1     | -                               |
| GF0023168 | 1                             | 1                         | 0                            | Hypothetical protein (2)                                                                  | -                                                                                                                                                                                                                                                                                                                                                                                                                                           | -                                                                                                                                                                                                                                                                                                                                                                                                                                                                                                                                                                                                | scaffold_6_mRNA_1588.1           | C_unshiu_00032_mRNA_49.1     | -                               |
| GF0023167 | 1                             | 1                         | 0                            | Hypothetical protein (2)                                                                  | -                                                                                                                                                                                                                                                                                                                                                                                                                                           | -                                                                                                                                                                                                                                                                                                                                                                                                                                                                                                                                                                                                | scaffold_6_mRNA_1584.1           | C_unshiu_00032_mRNA_44.1     | -                               |





| ID        | Num. in <i>C. clementinae</i> | Num in <i>C. anthoni</i> | Num in <i>P. trifoliata</i> | Note                                                                                          | GO                                                                                                                                                                                                                                                                                                                                                          | InterPro                                                                                                                                                                                                                                                                                                                                                                                                                                                                                                                                                                     | Members in <i>C. clementinae</i> | Members in <i>C. anthoni</i> | Members in <i>P. trifoliata</i> |
|-----------|-------------------------------|--------------------------|-----------------------------|-----------------------------------------------------------------------------------------------|-------------------------------------------------------------------------------------------------------------------------------------------------------------------------------------------------------------------------------------------------------------------------------------------------------------------------------------------------------------|------------------------------------------------------------------------------------------------------------------------------------------------------------------------------------------------------------------------------------------------------------------------------------------------------------------------------------------------------------------------------------------------------------------------------------------------------------------------------------------------------------------------------------------------------------------------------|----------------------------------|------------------------------|---------------------------------|
| GF0023018 | 1                             | 1                        | 0                           | LRR receptor-like kinase family protein (2)                                                   | ATP binding [GO:0005524 molecular_function] (2); protein phosphorylation [GO:0006468 biological_process] (2); protein kinase activity [GO:0004672 molecular_function] (2); protein binding [GO:0005515 molecular_function] (2)                                                                                                                              | Leucine-rich repeat-containing N-terminal; plant type [IPRO13210] (2); Serine/threonine-protein kinase, active site [IPRO08271] (2); Protein kinase, ATP binding site [IPRO17441] (2); Leucine-rich repeat [IPRO11611] (2); Protein kinase domain [IPRO00719] (2); Protein kinase-like domain [IPRO11009] (2); Leucine-rich repeat domain, L domain-like [IPRO13295] (1); Leucine-rich repeat, typical subtype [IPRO03591] (2); Serine/threonine/dual specificity protein kinase, catalytic domain [IPRO02290] (1); Consensus A-like lectin/glucanase domain [IPRO13320] (1) | scaffold_5_mRNA_729.1            | C_unshii_00034_mRNA_1.1      | -                               |
| GF0023017 | 1                             | 1                        | 0                           | Hypothetical protein (2)                                                                      | DNA integration [GO:0015074 biological_process] (2); nucleic acid binding [GO:0003676 molecular_function] (2)                                                                                                                                                                                                                                               | Integrase, catalytic core [IPRO01584] (2); Ribonuclease H-like domain [IPRO12337] (2)                                                                                                                                                                                                                                                                                                                                                                                                                                                                                        | scaffold_5_mRNA_727.1            | C_unshii_00034_mRNA_2.1      | -                               |
| GF0023016 | 1                             | 1                        | 0                           | Retrovirus-related pol polyprotein from transposon int 1-94 (2)                               | DNA integration [GO:0015074 biological_process] (2); nucleic acid binding [GO:0003676 molecular_function] (2)                                                                                                                                                                                                                                               | Integrase, catalytic core [IPRO01584] (2); Ribonuclease H-like domain [IPRO12337] (2)                                                                                                                                                                                                                                                                                                                                                                                                                                                                                        | scaffold_5_mRNA_726.1            | C_unshii_00034_mRNA_3.1      | -                               |
| GF0023015 | 1                             | 1                        | 0                           | Hypothetical protein (2)                                                                      | nucleic acid binding [GO:0003676 molecular_function] (1)                                                                                                                                                                                                                                                                                                    | Ribonuclease H-like domain [IPRO12337] (1)                                                                                                                                                                                                                                                                                                                                                                                                                                                                                                                                   | scaffold_5_mRNA_718.1            | C_unshii_00034_mRNA_11.1     | -                               |
| GF0023013 | 1                             | 1                        | 0                           | WEB family protein (2)                                                                        |                                                                                                                                                                                                                                                                                                                                                             |                                                                                                                                                                                                                                                                                                                                                                                                                                                                                                                                                                              | scaffold_5_mRNA_714.1            | C_unshii_00034_mRNA_14.1     | -                               |
| GF0023012 | 1                             | 1                        | 0                           | Hypothetical protein (2)                                                                      |                                                                                                                                                                                                                                                                                                                                                             |                                                                                                                                                                                                                                                                                                                                                                                                                                                                                                                                                                              | scaffold_5_mRNA_710.1            | C_unshii_00034_mRNA_16.1     | -                               |
| GF0023011 | 1                             | 1                        | 0                           | O-methyltransferase ZRP4 (2)                                                                  | O-methyltransferase activity [GO:0008171 molecular_function] (2); methyltransferase activity [GO:0008168 molecular_function] (2)                                                                                                                                                                                                                            | O-methyltransferase, family 2 [IPRO01077] (2); O-methyltransferase COMT-type [IPRO16461] (2); S-adenosyl-L-methionine-dependent methyltransferase [IPRO20663] (2)                                                                                                                                                                                                                                                                                                                                                                                                            | scaffold_5_mRNA_705.1            | C_unshii_00486_mRNA_21.1     | -                               |
| GF0023010 | 1                             | 1                        | 0                           | Hypothetical protein (2)                                                                      |                                                                                                                                                                                                                                                                                                                                                             |                                                                                                                                                                                                                                                                                                                                                                                                                                                                                                                                                                              | scaffold_5_mRNA_7.1              | C_unshii_00230_mRNA_24.1     | -                               |
| GF0023009 | 1                             | 1                        | 0                           | Hypothetical protein (2)                                                                      |                                                                                                                                                                                                                                                                                                                                                             |                                                                                                                                                                                                                                                                                                                                                                                                                                                                                                                                                                              | scaffold_5_mRNA_698.1            | C_unshii_00486_mRNA_19.1     | -                               |
| GF0023005 | 1                             | 1                        | 0                           | Hypothetical protein (2)                                                                      | metal ion binding [GO:0046872 molecular_function] (2); nucleic acid binding [GO:0003676 molecular_function] (1); zinc ion binding [GO:0008270 molecular_function] (1)                                                                                                                                                                                       | Zinc finger, CCHC-type [IPRO00571] (2); Zinc finger, C2HC-type [IPRO01878] (1)                                                                                                                                                                                                                                                                                                                                                                                                                                                                                               | scaffold_5_mRNA_676.1            | C_unshii_00486_mRNA_1.1      | -                               |
| GF0023004 | 1                             | 1                        | 0                           | Hypothetical protein (2)                                                                      |                                                                                                                                                                                                                                                                                                                                                             |                                                                                                                                                                                                                                                                                                                                                                                                                                                                                                                                                                              | scaffold_5_mRNA_673.1            | C_unshii_00324_mRNA_14.1     | -                               |
| GF0023003 | 1                             | 1                        | 0                           | Embryogenesis-associated EMBS (2)                                                             |                                                                                                                                                                                                                                                                                                                                                             | Alpha/Beta hydrolase fold [IPRO29058] (2)                                                                                                                                                                                                                                                                                                                                                                                                                                                                                                                                    | scaffold_5_mRNA_670.1            | C_unshii_00324_mRNA_17.1     | -                               |
| GF0023002 | 1                             | 1                        | 0                           | Hypothetical protein (2)                                                                      |                                                                                                                                                                                                                                                                                                                                                             | Domain of unknown function DUF4283 [IPRO25588] (2)                                                                                                                                                                                                                                                                                                                                                                                                                                                                                                                           | scaffold_5_mRNA_663.1            | C_unshii_00324_mRNA_25.1     | -                               |
| GF0023001 | 1                             | 1                        | 0                           | Hypothetical protein (2)                                                                      | nucleic acid binding [GO:0003676 molecular_function] (1)                                                                                                                                                                                                                                                                                                    | Ribonuclease H-like domain [IPRO12337] (1)                                                                                                                                                                                                                                                                                                                                                                                                                                                                                                                                   | scaffold_5_mRNA_662.1            | C_unshii_00324_mRNA_26.1     | -                               |
| GF0023000 | 1                             | 1                        | 0                           | Hypothetical protein (2)                                                                      | nucleic acid binding [GO:0003676 molecular_function] (2); RNA-DNA hybrid ribonuclease activity [GO:0004523 molecular_function] (1)                                                                                                                                                                                                                          | Ribonuclease H-like domain [IPRO12337] (2); Ribonuclease H domain [IPRO02156] (1)                                                                                                                                                                                                                                                                                                                                                                                                                                                                                            | scaffold_5_mRNA_661.1            | C_unshii_00695_mRNA_15.1     | -                               |
| GF0022999 | 1                             | 1                        | 0                           | Retrotransposon protein, putative, Ty1- $\omega$ copia subclass (1); Hypothetical protein (1) |                                                                                                                                                                                                                                                                                                                                                             |                                                                                                                                                                                                                                                                                                                                                                                                                                                                                                                                                                              | scaffold_5_mRNA_657.1            | C_unshii_00269_mRNA_31.1     | -                               |
| GF0022998 | 1                             | 1                        | 0                           | Hypothetical protein (2)                                                                      |                                                                                                                                                                                                                                                                                                                                                             |                                                                                                                                                                                                                                                                                                                                                                                                                                                                                                                                                                              | scaffold_5_mRNA_655.1            | C_unshii_00269_mRNA_27.1     | -                               |
| GF0022997 | 1                             | 1                        | 0                           | Hypothetical protein (2)                                                                      |                                                                                                                                                                                                                                                                                                                                                             |                                                                                                                                                                                                                                                                                                                                                                                                                                                                                                                                                                              | scaffold_5_mRNA_654.1            | C_unshii_01868_mRNA_2.1      | -                               |
| GF0022996 | 1                             | 1                        | 0                           | Hypothetical protein (2)                                                                      |                                                                                                                                                                                                                                                                                                                                                             |                                                                                                                                                                                                                                                                                                                                                                                                                                                                                                                                                                              | scaffold_5_mRNA_649.1            | C_unshii_00269_mRNA_19.1     | -                               |
| GF0022995 | 1                             | 1                        | 0                           | Hypothetical protein (2)                                                                      |                                                                                                                                                                                                                                                                                                                                                             |                                                                                                                                                                                                                                                                                                                                                                                                                                                                                                                                                                              | scaffold_5_mRNA_647.1            | C_unshii_00269_mRNA_17.1     | -                               |
| GF0022994 | 1                             | 1                        | 0                           | Hypothetical protein (2)                                                                      | protein kinase activity [GO:0004672 molecular_function] (1); protein phosphorylation [GO:0006468 biological_process] (1); ATP binding [GO:0005524 molecular_function] (1) zinc ion binding [GO:0008270 molecular_function] (2); nucleic acid binding [GO:0003676 molecular_function] (2)                                                                    | Protein kinase-like domain [IPRO11009] (1); Protein kinase domain [IPRO00719] (1)                                                                                                                                                                                                                                                                                                                                                                                                                                                                                            | scaffold_5_mRNA_639.1            | C_unshii_00269_mRNA_11.1     | -                               |
| GF0022993 | 1                             | 1                        | 0                           | Hypothetical protein (2)                                                                      |                                                                                                                                                                                                                                                                                                                                                             | Zinc finger, CCHC-type [IPRO01878] (2)                                                                                                                                                                                                                                                                                                                                                                                                                                                                                                                                       | scaffold_5_mRNA_636.1            | C_unshii_00492_mRNA_3.1      | -                               |
| GF0022991 | 1                             | 1                        | 0                           | Hypothetical protein (2)                                                                      |                                                                                                                                                                                                                                                                                                                                                             |                                                                                                                                                                                                                                                                                                                                                                                                                                                                                                                                                                              | scaffold_5_mRNA_627.1            | C_unshii_00234_mRNA_4.1      | -                               |
| GF0022990 | 1                             | 1                        | 0                           | Hypothetical protein (2)                                                                      |                                                                                                                                                                                                                                                                                                                                                             |                                                                                                                                                                                                                                                                                                                                                                                                                                                                                                                                                                              | scaffold_5_mRNA_625.1            | C_unshii_00234_mRNA_2.1      | -                               |
| GF0022989 | 1                             | 1                        | 0                           | Hypothetical protein (2)                                                                      |                                                                                                                                                                                                                                                                                                                                                             |                                                                                                                                                                                                                                                                                                                                                                                                                                                                                                                                                                              | scaffold_5_mRNA_623.1            | C_unshii_00636_mRNA_9.1      | -                               |
| GF0022988 | 1                             | 1                        | 0                           | Hypothetical protein (2)                                                                      | protein binding [GO:0005515 molecular_function] (2); RNA processing [GO:0006396 biological_process] (2)                                                                                                                                                                                                                                                     | Ribokinase-like [IPRO29056] (2); HAT (Half-A-TPR) repeat [IPRO03107] (1); Tetraicosapeptide-like helical domain [IPRO11990] (2)                                                                                                                                                                                                                                                                                                                                                                                                                                              | scaffold_5_mRNA_621.1            | C_unshii_00234_mRNA_21.1     | -                               |
| GF0022987 | 1                             | 1                        | 0                           | HAT family dimerization domain containing protein (2)                                         | protein dimerization activity [GO:0046983 molecular_function] (2)                                                                                                                                                                                                                                                                                           | HAT, C-terminal dimerisation domain [IPRO08906] (2)                                                                                                                                                                                                                                                                                                                                                                                                                                                                                                                          | scaffold_5_mRNA_619.1            | C_unshii_00354_mRNA_1.1      | -                               |
| GF0022985 | 1                             | 1                        | 0                           | Retrotransposon protein, putative, unclassified (1); Hypothetical protein (1)                 | nucleic acid binding [GO:0003676 molecular_function] (2)                                                                                                                                                                                                                                                                                                    | Ribonuclease H-like domain [IPRO12337] (2)                                                                                                                                                                                                                                                                                                                                                                                                                                                                                                                                   | scaffold_5_mRNA_610.1            | C_unshii_00354_mRNA_4.1      | -                               |
| GF0022984 | 1                             | 1                        | 0                           | Hypothetical protein (2)                                                                      |                                                                                                                                                                                                                                                                                                                                                             | Analytically retrotransposon Or1 [IPRO04312] (2)                                                                                                                                                                                                                                                                                                                                                                                                                                                                                                                             | scaffold_5_mRNA_609.1            | C_unshii_00354_mRNA_7.1      | -                               |
| GF0022983 | 1                             | 1                        | 0                           | Hypothetical protein (2)                                                                      |                                                                                                                                                                                                                                                                                                                                                             |                                                                                                                                                                                                                                                                                                                                                                                                                                                                                                                                                                              | scaffold_5_mRNA_6.1              | C_unshii_00230_mRNA_28.1     | -                               |
| GF0022982 | 1                             | 1                        | 0                           | Disease resistance protein (CC-NBS-LRR class) family protein (2)                              | ADP binding [GO:0043531 molecular_function] (2)                                                                                                                                                                                                                                                                                                             | Leucine-rich repeat domain, L domain-like [IPRO32675] (2); P-loop containing nucleoside triphosphate hydrolase [IPRO27417] (2); NB-ARC [IPRO02182] (2); AAA-ATPase domain [IPRO03593] (2); Winged helix-turn-helix DNA-binding domain [IPRO11991] (1)                                                                                                                                                                                                                                                                                                                        | scaffold_5_mRNA_594.1            | C_unshii_01036_mRNA_4.1      | -                               |
| GF0022981 | 1                             | 1                        | 0                           | FAD-binding Berberine family protein (2)                                                      | flavin adenine dinucleotide binding [GO:0005660 molecular_function] (2); oxidoreductase activity [GO:0016491 molecular_function] (2); oxidation-reduction process [GO:0055114 biological_process] (2); oxidoreductase activity, acting on CH-OH group of donors [GO:0016614 molecular_function] (2); catalytic activity [GO:0003824 molecular_function] (2) | Berberine/berberine-like [IPRO12951] (2); FAD-binding, type 2 [IPRO16166] (2); FAD linked oxidase, N-terminal [IPRO6094] (1); Oxygen oxidoreductase covalent FAD-binding site [IPRO06993] (1); FAD-binding, type 2, subdomain 1 [IPRO16167] (1); CO dehydrogenase flavoprotein-like binding, subdomain 2 [IPRO16169] (1)                                                                                                                                                                                                                                                     | scaffold_5_mRNA_587.1            | C_unshii_00108_mRNA_15.1     | -                               |
| GF0022980 | 1                             | 1                        | 0                           | 60S ribosomal protein L3 (2)                                                                  | cellular component [GO:0005840 cellular_component] (2); translation [GO:0006412 biological_process] (2); intracellular [GO:0000522 cellular_component] (2); structural constituent of ribosome [GO:0003735 molecular_function] (2)                                                                                                                          | Ribosomal protein L3 [IPRO00597] (2); Translation protein, beta-barrel domain [IPRO00000] (2); Ribosomal protein L3, conserved site [IPRO19926] (2)                                                                                                                                                                                                                                                                                                                                                                                                                          | scaffold_5_mRNA_579.1            | C_unshii_00108_mRNA_11.1     | -                               |
| GF0022979 | 1                             | 1                        | 0                           | Hypothetical protein (2)                                                                      |                                                                                                                                                                                                                                                                                                                                                             |                                                                                                                                                                                                                                                                                                                                                                                                                                                                                                                                                                              | scaffold_5_mRNA_572.1            | C_unshii_00108_mRNA_4.1      | -                               |
| GF0022978 | 1                             | 1                        | 0                           | Hypothetical protein (1); Transposase (1)                                                     | DNA binding [GO:0003677 molecular_function] (2); nucleic acid binding [GO:0003676 molecular_function] (1); protein dimerization activity [GO:0046983 molecular_function] (1)                                                                                                                                                                                | hAT-like transposase, RNase-H fold [IPRO25525] (2); Ribonuclease H-like domain [IPRO12337] (1); HAT, C-terminal dimerisation domain [IPRO08906] (1)                                                                                                                                                                                                                                                                                                                                                                                                                          | scaffold_5_mRNA_571.1            | C_unshii_00108_mRNA_3.1      | -                               |
| GF0022975 | 1                             | 1                        | 0                           | Hypothetical protein (2)                                                                      |                                                                                                                                                                                                                                                                                                                                                             |                                                                                                                                                                                                                                                                                                                                                                                                                                                                                                                                                                              | scaffold_5_mRNA_557.1            | C_unshii_00710_mRNA_4.1      | -                               |
| GF0022974 | 1                             | 1                        | 0                           | Hypothetical protein (2)                                                                      |                                                                                                                                                                                                                                                                                                                                                             |                                                                                                                                                                                                                                                                                                                                                                                                                                                                                                                                                                              | scaffold_5_mRNA_556.1            | C_unshii_00710_mRNA_5.1      | -                               |
| GF0022973 | 1                             | 1                        | 0                           | Hypothetical protein (2)                                                                      |                                                                                                                                                                                                                                                                                                                                                             | Ankyrin repeat-containing domain [IPRO20683] (2)                                                                                                                                                                                                                                                                                                                                                                                                                                                                                                                             | scaffold_5_mRNA_555.1            | C_unshii_00710_mRNA_6.1      | -                               |
| GF0022972 | 1                             | 1                        | 0                           | Hypothetical protein (2)                                                                      |                                                                                                                                                                                                                                                                                                                                                             |                                                                                                                                                                                                                                                                                                                                                                                                                                                                                                                                                                              | scaffold_5_mRNA_55.1             | C_unshii_00231_mRNA_13.1     | -                               |
| GF0022971 | 1                             | 1                        | 0                           | Hypothetical protein (2)                                                                      |                                                                                                                                                                                                                                                                                                                                                             | Aspartic peptidase domain [IPRO21109] (1)                                                                                                                                                                                                                                                                                                                                                                                                                                                                                                                                    | scaffold_5_mRNA_548.1            | C_unshii_00035_mRNA_73.1     | -                               |
| GF0022970 | 1                             | 1                        | 0                           | Hypothetical protein (2)                                                                      |                                                                                                                                                                                                                                                                                                                                                             | Aspartic peptidase domain [IPRO21109] (1)                                                                                                                                                                                                                                                                                                                                                                                                                                                                                                                                    | scaffold_5_mRNA_532.1            | C_unshii_00561_mRNA_14.1     | -                               |
| GF0022965 | 1                             | 1                        | 0                           | Hypothetical protein (2)                                                                      | ADP binding [GO:0043531 molecular_function] (2)                                                                                                                                                                                                                                                                                                             | P-loop containing nucleoside triphosphate hydrolase [IPRO27417] (2); NB-ARC [IPRO02182] (2); Winged helix-turn-helix DNA-binding domain [IPRO11991] (1)                                                                                                                                                                                                                                                                                                                                                                                                                      | scaffold_5_mRNA_520.1            | C_unshii_00561_mRNA_12.1     | -                               |
| GF0022964 | 1                             | 1                        | 0                           | Hypothetical protein (2)                                                                      |                                                                                                                                                                                                                                                                                                                                                             | Leucine-rich repeat domain, L domain-like [IPRO32675] (1)                                                                                                                                                                                                                                                                                                                                                                                                                                                                                                                    | scaffold_5_mRNA_52.1             | C_unshii_00231_mRNA_10.1     | -                               |
| GF0022963 | 1                             | 1                        | 0                           | Hypothetical protein (2)                                                                      | regulation of transcription, DNA-templated [GO:0006355 biological_process] (2); zinc ion binding [GO:0008270 molecular_function] (2)                                                                                                                                                                                                                        | FHY3/FAR1 family [IPRO31052] (2); FAK1 DNA binding domain [IPRO04310] (2); Zinc finger, PHZ-type [IPRO06564] (2); Zinc finger, SWIM-type [IPRO07527] (2)                                                                                                                                                                                                                                                                                                                                                                                                                     | scaffold_5_mRNA_519.1            | C_unshii_00697_mRNA_2.2      | -                               |
| GF0022961 | 1                             | 1                        | 0                           | Xylem cysteine peptidase 1 (2)                                                                | cysteine-type peptidase activity [GO:0008234 molecular_function] (2); proteolysis [GO:0006058 biological_process] (2)                                                                                                                                                                                                                                       | Peptidase C1A [IPRO13128] (2); Cysteine peptidase, cysteine active site [IPRO0169] (2); Cysteine peptidase, histidine active site [IPRO25660] (2); Peptidase C1A, papain C-terminal [IPRO0698] (2); Cysteine peptidase, asparagine active site [IPRO25661] (2); Cathepsin propeptide inhibitor domain [IPRO13201] (2)                                                                                                                                                                                                                                                        | scaffold_5_mRNA_518.1            | C_unshii_00370_mRNA_21.1     | -                               |
| GF0022958 | 1                             | 1                        | 0                           | Hypothetical protein (2)                                                                      | enzyme inhibitor activity [GO:0004857 molecular_function] (1)                                                                                                                                                                                                                                                                                               | Proteinase inhibitor domain [IPRO05011] (1)                                                                                                                                                                                                                                                                                                                                                                                                                                                                                                                                  | scaffold_5_mRNA_515.1            | C_unshii_00561_mRNA_15.1     | -                               |
| GF0022957 | 1                             | 1                        | 0                           | Dimethylamine monoxygenase, putative (2)                                                      | dimethylamine monoxygenase activity [GO:0005514 biological_process] (2); flavin adenine dinucleotide binding [GO:0005660 molecular_function] (2); NADP binding [GO:0050661 molecular_function] (2); N,N-dimethylamine monoxygenase activity [GO:0004499 molecular_function] (2)                                                                             | Dimethylamine monoxygenase, N-oxide-forming [IPRO12143] (2); FAD/NAD(P)-binding domain [IPRO23753] (2); Flavin monoxygenase-like [IPRO20946] (2)                                                                                                                                                                                                                                                                                                                                                                                                                             | scaffold_5_mRNA_513.1            | C_unshii_00623_mRNA_11.1     | -                               |
| GF0022956 | 1                             | 1                        | 0                           | Hypothetical protein (1); BAHD acyltransferase (1)                                            | transferase activity, transferring acyl groups other than amino-acyl groups [GO:0016747 molecular_function] (1)                                                                                                                                                                                                                                             | Transferase [IPRO3480] (1); Chloramphenicol acetyltransferase-like domain [IPRO23213] (1)                                                                                                                                                                                                                                                                                                                                                                                                                                                                                    | scaffold_5_mRNA_512.1            | C_unshii_00623_mRNA_6.1      | -                               |

| ID        | Num. in <i>C. caryophyllae</i> | Num. in <i>C. acanthi</i> | Num. in <i>P. trifoliata</i> | Note                                                                         | GO                                                                                                                                                                                                                                                                                                                                                                 | InterPro                                                                                                                                                                                                                                                                                                                                                                                                   | Members in <i>C. caryophyllae</i> | Members in <i>C. acanthi</i> | Members in <i>P. trifoliata</i> |
|-----------|--------------------------------|---------------------------|------------------------------|------------------------------------------------------------------------------|--------------------------------------------------------------------------------------------------------------------------------------------------------------------------------------------------------------------------------------------------------------------------------------------------------------------------------------------------------------------|------------------------------------------------------------------------------------------------------------------------------------------------------------------------------------------------------------------------------------------------------------------------------------------------------------------------------------------------------------------------------------------------------------|-----------------------------------|------------------------------|---------------------------------|
| GF0022955 | 1                              | 1                         | 0                            | Acylsugar acyltransferase 3 (2)                                              | transferase activity, transferring acyl groups other than amino-acyl groups [GO:0016747 molecular_function] (2)                                                                                                                                                                                                                                                    | Transferase [IPRO03480] (2); Chlorophenyl acetyltransferase-like domain [IPRO23213] (1)                                                                                                                                                                                                                                                                                                                    | scaffold_5_mRNA_5127.1            | C_umshii_00623_mRNA_5.1      | -                               |
| GF0022954 | 1                              | 1                         | 0                            | Hypothetical protein (2)                                                     |                                                                                                                                                                                                                                                                                                                                                                    |                                                                                                                                                                                                                                                                                                                                                                                                            | scaffold_5_mRNA_5120.1            | C_umshii_01461_mRNA_5.1      | -                               |
| GF0022952 | 1                              | 1                         | 0                            | Hypothetical protein (2)                                                     |                                                                                                                                                                                                                                                                                                                                                                    |                                                                                                                                                                                                                                                                                                                                                                                                            | scaffold_5_mRNA_5112.1            | C_umshii_00409_mRNA_13.1     | -                               |
| GF0022948 | 1                              | 1                         | 0                            | Hypothetical protein (2)                                                     |                                                                                                                                                                                                                                                                                                                                                                    |                                                                                                                                                                                                                                                                                                                                                                                                            | scaffold_5_mRNA_5105.1            | C_umshii_00409_mRNA_10.1     | -                               |
| GF0022946 | 1                              | 1                         | 0                            | Hypothetical protein (1); U11/U12 small nuclear ribonucleoprotein 25 kDa (1) |                                                                                                                                                                                                                                                                                                                                                                    | Ubiquitin-related domain [IPRO29071] (2)                                                                                                                                                                                                                                                                                                                                                                   | scaffold_5_mRNA_5089.1            | C_umshii_00527_mRNA_2.1      | -                               |
| GF0022941 | 1                              | 1                         | 0                            | Hypothetical protein (2)                                                     |                                                                                                                                                                                                                                                                                                                                                                    |                                                                                                                                                                                                                                                                                                                                                                                                            | scaffold_5_mRNA_5046.1            | C_umshii_00102_mRNA_34.1     | -                               |
| GF0022940 | 1                              | 1                         | 0                            | Hypothetical protein (2)                                                     |                                                                                                                                                                                                                                                                                                                                                                    |                                                                                                                                                                                                                                                                                                                                                                                                            | scaffold_5_mRNA_5038.1            | C_umshii_00061_mRNA_51.1     | -                               |
| GF0022938 | 1                              | 1                         | 0                            | Hypothetical protein (2)                                                     |                                                                                                                                                                                                                                                                                                                                                                    |                                                                                                                                                                                                                                                                                                                                                                                                            | scaffold_5_mRNA_503.1             | C_umshii_02469_mRNA_2.1      | -                               |
| GF0022936 | 1                              | 1                         | 0                            | Hypothetical protein (2)                                                     | GTP binding [GO:0005525 molecular_function] (2); microtubule [GO:0005874 cellular_component] (2); structural constituent of cytoskeleton [GO:0005200 molecular_function] (2); microtubule-based process [GO:0007010 biological_process] (2); GTPase activity [GO:0003924 molecular_function] (2)                                                                   | Beta tubulin [IPRO02453] (2); Tubulin-FtsZ, GTPase domain [IPRO03098] (2); Tubulin [IPRO00217] (2); Tubulin-FtsZ, 2-layer sandwich domain [IPRO18316] (2); Tubulin-FtsZ, C-terminal [IPRO08280] (2); Brain reproductive organ-expressed protein [IPRO10358] (2); Tubulin, conserved site [IPRO17975] (1); Tubulin, C-terminal [IPRO23123] (1)                                                              | scaffold_5_mRNA_5025.1            | C_umshii_00192_mRNA_14.1     | -                               |
| GF0022935 | 1                              | 1                         | 0                            | Hypothetical protein (2)                                                     |                                                                                                                                                                                                                                                                                                                                                                    |                                                                                                                                                                                                                                                                                                                                                                                                            | scaffold_5_mRNA_5023.2            | C_umshii_00192_mRNA_12.2     | -                               |
| GF0022934 | 1                              | 1                         | 0                            | Hypothetical protein (2)                                                     | protein retention in ER lumen [GO:0006621 biological_process] (2); glycoprotein alpha-N-acetylgalactosaminidase activity [GO:0033926 molecular_function] (2); catalytic activity [GO:0003824 molecular_function] (2); integral component of membrane [GO:0016021 cellular_component] (2); ER retention sequence binding [GO:0046923 molecular_function] (2)        | ER lumen protein retaining receptor [IPRO00133] (2); Six-hairpin glycosylase-like [IPRO08928] (2); Glycosyl hydrolase family 100 [IPRO24746] (2)                                                                                                                                                                                                                                                           | scaffold_5_mRNA_5022.1            | C_umshii_00192_mRNA_11.1     | -                               |
| GF0022933 | 1                              | 1                         | 0                            | Hypothetical protein (2)                                                     | heat shock protein binding [GO:0031072 molecular_function] (2); unfolded protein binding [GO:0051082 molecular_function] (2)                                                                                                                                                                                                                                       | Heat shock protein DnaJ, cysteine-rich domain [IPRO01305] (2)                                                                                                                                                                                                                                                                                                                                              | scaffold_5_mRNA_5020.1            | C_umshii_00192_mRNA_9.1      | -                               |
| GF0022932 | 1                              | 1                         | 0                            | Protein disulfide-isomerase LQY1 (2)                                         |                                                                                                                                                                                                                                                                                                                                                                    |                                                                                                                                                                                                                                                                                                                                                                                                            | scaffold_5_mRNA_5009.1            | C_umshii_00009_mRNA_158.1    | -                               |
| GF0022931 | 1                              | 1                         | 0                            | Hypothetical protein (2)                                                     |                                                                                                                                                                                                                                                                                                                                                                    |                                                                                                                                                                                                                                                                                                                                                                                                            | scaffold_5_mRNA_5.1               | C_umshii_00203_mRNA_29.1     | -                               |
| GF0022928 | 1                              | 1                         | 0                            | Transmembrane and coiled-coil protein (2)                                    |                                                                                                                                                                                                                                                                                                                                                                    | Protein of unknown function DUF726 [IPRO07941] (2); Alpha/Beta hydrolase fold [IPRO20058] (2)                                                                                                                                                                                                                                                                                                              | scaffold_5_mRNA_4975.1            | C_umshii_00009_mRNA_123.1    | -                               |
| GF0022926 | 1                              | 1                         | 0                            | S-type anion channel SLAH1 (2)                                               | transmembrane transport [GO:0055085 biological_process] (2); integral component of membrane [GO:0016021 cellular_component] (2); voltage-gated anion channel activity [GO:0008308 molecular_function] (1); cellular ion homeostasis [GO:0006873 biological_process] (1)                                                                                            | Voltage-dependent anion channel [IPRO04695] (2); S-type anion channel [IPRO30183] (1)                                                                                                                                                                                                                                                                                                                      | scaffold_5_mRNA_4970.1            | C_umshii_00009_mRNA_120.1    | -                               |
| GF0022925 | 1                              | 1                         | 0                            | Hypothetical protein (2)                                                     |                                                                                                                                                                                                                                                                                                                                                                    |                                                                                                                                                                                                                                                                                                                                                                                                            | scaffold_5_mRNA_4964.1            | C_umshii_00009_mRNA_114.1    | -                               |
| GF0022922 | 1                              | 1                         | 0                            | Hypothetical protein (2)                                                     |                                                                                                                                                                                                                                                                                                                                                                    | Cyclin-like [IPRO13763] (1)                                                                                                                                                                                                                                                                                                                                                                                | scaffold_5_mRNA_4930.1            | C_umshii_00127_mRNA_33.1     | -                               |
| GF0022921 | 1                              | 1                         | 0                            | Hypothetical protein (2)                                                     |                                                                                                                                                                                                                                                                                                                                                                    | P-loop containing nucleoside triphosphate hydrolase [IPRO27417] (2)                                                                                                                                                                                                                                                                                                                                        | scaffold_5_mRNA_4927.1            | C_umshii_00127_mRNA_36.1     | -                               |
| GF0022919 | 1                              | 1                         | 0                            | Hypothetical protein (2)                                                     |                                                                                                                                                                                                                                                                                                                                                                    | ZF-HD homeobox protein, Cys/HIS-rich dimerization domain [IPRO06456] (2); Homeodomain, ZF-HD class [IPRO06455] (2); Homeodomain-like [IPRO09057] (1); Homeobox domain-like [IPRO09057] (1)                                                                                                                                                                                                                 | scaffold_5_mRNA_4911.1            | C_umshii_00127_mRNA_50.1     | -                               |
| GF0022918 | 1                              | 1                         | 0                            | Zinc finger homeodomain protein 1 (1); Zinc-finger homeodomain protein 1 (1) | DNA binding [GO:0003677 molecular_function] (2)                                                                                                                                                                                                                                                                                                                    |                                                                                                                                                                                                                                                                                                                                                                                                            | scaffold_5_mRNA_4902.1            | C_umshii_00079_mRNA_4.1      | -                               |
| GF0022917 | 1                              | 1                         | 0                            | Hypothetical protein (2)                                                     |                                                                                                                                                                                                                                                                                                                                                                    |                                                                                                                                                                                                                                                                                                                                                                                                            | scaffold_5_mRNA_4900.1            | C_umshii_01543_mRNA_5.1      | -                               |
| GF0022911 | 1                              | 1                         | 0                            | Hypothetical protein (2)                                                     |                                                                                                                                                                                                                                                                                                                                                                    |                                                                                                                                                                                                                                                                                                                                                                                                            | scaffold_5_mRNA_4847.1            | C_umshii_00234_mRNA_23.1     | -                               |
| GF0022909 | 1                              | 1                         | 0                            | DUF617 family protein (2)                                                    |                                                                                                                                                                                                                                                                                                                                                                    | Protein of unknown function DUF617, plant [IPRO06460] (1); Protein MIZU-KUSSE1 1-like, plant [IPRO06460] (1)                                                                                                                                                                                                                                                                                               | scaffold_5_mRNA_4811.1            | C_umshii_00013_mRNA_108.1    | -                               |
| GF0022908 | 1                              | 1                         | 0                            | Hypothetical protein (2)                                                     |                                                                                                                                                                                                                                                                                                                                                                    |                                                                                                                                                                                                                                                                                                                                                                                                            | scaffold_5_mRNA_4796.1            | C_umshii_00951_mRNA_18.1     | -                               |
| GF0022905 | 1                              | 1                         | 0                            | Putative succinate dehydrogenase 5-like (1); Succinate dehydrogenase 5 (1)   |                                                                                                                                                                                                                                                                                                                                                                    | Protein of unknown function DUF4370 [IPRO25397] (2)                                                                                                                                                                                                                                                                                                                                                        | scaffold_5_mRNA_4789.1            | C_umshii_00951_mRNA_12.1     | -                               |
| GF0022902 | 1                              | 1                         | 0                            | Hypothetical protein (2)                                                     |                                                                                                                                                                                                                                                                                                                                                                    |                                                                                                                                                                                                                                                                                                                                                                                                            | scaffold_5_mRNA_478.1             | C_umshii_00308_mRNA_3.1      | -                               |
| GF0022901 | 1                              | 1                         | 0                            | Hypothetical protein (2)                                                     | protein binding [GO:0005515 molecular_function] (2); RNA-DNA hybrid ribonuclease activity [GO:004523 molecular_function] (1); nucleic acid binding [GO:0003676 molecular_function] (1)                                                                                                                                                                             | WD40-YVTN repeat-like-containing domain [IPRO15943] (2); WD40-repeat-containing domain [IPRO17986] (2); WD40 repeat [IPRO16580] (1); Ribonuclease H domain [IPRO02156] (1); Ribonuclease H-like domain [IPRO12337] (1)                                                                                                                                                                                     | scaffold_5_mRNA_477.1             | C_umshii_00610_mRNA_8.1      | -                               |
| GF0022899 | 1                              | 1                         | 0                            | Hypothetical protein (2)                                                     | regulation of defense response [GO:0031347 biological_process] (2); ubiquitin-protein transferase activity [GO:0004842 molecular_function] (2); nucleus [GO:0005634 cellular_component] (2); protein ubiquitination [GO:0016587 biological_process] (2); zinc ion binding [GO:0008270 molecular_function] (2); protein binding [GO:0005515 molecular_function] (2) | Zinc finger, RING-type [IPRO01841] (2); E3 ubiquitin-protein ligase BOI [IPRO17066] (2); Zinc finger, RING/YVE/PHD-type [IPRO13083] (1)                                                                                                                                                                                                                                                                    | scaffold_5_mRNA_4756.1            | C_umshii_00096_mRNA_42.1     | -                               |
| GF0022898 | 1                              | 1                         | 0                            | Daclovalin IAP repeat-containing protein 3 (2)                               |                                                                                                                                                                                                                                                                                                                                                                    |                                                                                                                                                                                                                                                                                                                                                                                                            | scaffold_5_mRNA_4751.1            | C_umshii_00096_mRNA_38.1     | -                               |
| GF0022897 | 1                              | 1                         | 0                            | Hypothetical protein (2)                                                     |                                                                                                                                                                                                                                                                                                                                                                    |                                                                                                                                                                                                                                                                                                                                                                                                            | scaffold_5_mRNA_475.1             | C_umshii_00646_mRNA_7.1      | -                               |
| GF0022895 | 1                              | 1                         | 0                            | Poly(A) binding protein 6, putative isoform 1 (2)                            | RNA binding [GO:0003723 molecular_function] (2); nucleic acid binding [GO:0003676 molecular_function] (2); nucleotide binding [GO:0000166 molecular_function] (1)                                                                                                                                                                                                  | Polyadenylate-binding protein/Hyperplastic disc protein [IPRO02004] (2); RNA recognition motif domain, eukaryote [IPRO03954] (2); RNA recognition motif domain [IPRO00504] (2); Polyadenylate binding protein, human types 1, 2, 3, 4 [IPRO00515] (2); Nucleotide-binding alpha-beta plat domain [IPRO12677] (1)                                                                                           | scaffold_5_mRNA_4741.1            | C_umshii_00096_mRNA_31.1     | -                               |
| GF0022893 | 1                              | 1                         | 0                            | Serine/threonine-protein kinase WNK (2)                                      |                                                                                                                                                                                                                                                                                                                                                                    | Transcription factor MYC/MYB N-terminal [IPRO25610] (2)                                                                                                                                                                                                                                                                                                                                                    | scaffold_5_mRNA_4730.1            | C_umshii_00096_mRNA_19.1     | -                               |
| GF0022892 | 1                              | 1                         | 0                            | Cyclin D (2)                                                                 | nucleus [GO:0005634 cellular_component] (2)                                                                                                                                                                                                                                                                                                                        | Cyclin, C-terminal domain [IPRO04367] (2); Cyclin-like [IPRO13763] (2); Cyclin, N-terminal [IPRO06671] (2)                                                                                                                                                                                                                                                                                                 | scaffold_5_mRNA_4726.1            | C_umshii_00096_mRNA_13.1     | -                               |
| GF0022890 | 1                              | 1                         | 0                            | Hypothetical protein (2)                                                     |                                                                                                                                                                                                                                                                                                                                                                    |                                                                                                                                                                                                                                                                                                                                                                                                            | scaffold_5_mRNA_4705.1            | C_umshii_01089_mRNA_10.1     | -                               |
| GF0022888 | 1                              | 1                         | 0                            | CHC4-type RING finger protein (2)                                            | protein binding [GO:0005515 molecular_function] (2); zinc ion binding [GO:0008270 molecular_function] (2)                                                                                                                                                                                                                                                          | Zinc finger, RING/YVE/PHD-type [IPRO13083] (2); Protein of unknown function DUF1232 [IPRO10652] (2); Zinc finger, RING-type [IPRO01841] (2); Zinc finger, RING-type, conserved site [IPRO17907] (2)                                                                                                                                                                                                        | scaffold_5_mRNA_4696.1            | C_umshii_01089_mRNA_17.1     | -                               |
| GF0022886 | 1                              | 1                         | 0                            | Hypothetical protein (2)                                                     |                                                                                                                                                                                                                                                                                                                                                                    |                                                                                                                                                                                                                                                                                                                                                                                                            | scaffold_5_mRNA_4687.1            | C_umshii_01033_mRNA_11.1     | -                               |
| GF0022885 | 1                              | 1                         | 0                            | Epidermal patterning factor (2)                                              |                                                                                                                                                                                                                                                                                                                                                                    |                                                                                                                                                                                                                                                                                                                                                                                                            | scaffold_5_mRNA_4681.1            | C_umshii_01033_mRNA_5.1      | -                               |
| GF0022884 | 1                              | 1                         | 0                            | Hypothetical protein (2)                                                     |                                                                                                                                                                                                                                                                                                                                                                    |                                                                                                                                                                                                                                                                                                                                                                                                            | scaffold_5_mRNA_4676.1            | C_umshii_00457_mRNA_31.1     | -                               |
| GF0022881 | 1                              | 1                         | 0                            | Hypothetical protein (2)                                                     | histidinol-phosphate transaminase activity [GO:0004400 molecular_function] (1); biosynthetic process [GO:0009058 biological_process] (1); catalytic activity [GO:0003824 molecular_function] (1); pyridoxal phosphate binding [GO:0030170 molecular_function] (1); histidine biosynthetic process [GO:0000105 biological_process] (1)                              | Protein of unknown function DUF616 [IPRO06852] (2); Pyridoxal phosphate-dependent transferase, major region, subdomain 1 [IPRO15421] (1); Aminotransferase, class I/class I [IPRO04839] (1); Pyridoxal phosphate-dependent transferase, major region, subdomain 2 [IPRO15422] (1); Pyridoxal phosphate-dependent transferase [IPRO15424] (1); Histidinol-phosphate aminotransferase family [IPRO05861] (1) | scaffold_5_mRNA_4657.1            | C_umshii_00457_mRNA_11.1     | -                               |
| GF0022880 | 1                              | 1                         | 0                            | Similar to ATP-binding domain 1 family member B (1); GPN-loop GTPase 2 (1)   |                                                                                                                                                                                                                                                                                                                                                                    | P-loop containing nucleoside triphosphate hydrolase [IPRO27417] (2); GPN-loop GTPase [IPRO04130] (2); GPN-loop GTPase 2 [IPRO30231] (2)                                                                                                                                                                                                                                                                    | scaffold_5_mRNA_4651.1            | C_umshii_00646_mRNA_10.1     | -                               |
| GF0022879 | 1                              | 1                         | 0                            | CCA tRNA nucleotidyltransferase, mitochondrial (2)                           | RNA binding [GO:0003723 molecular_function] (2); RNA processing [GO:0006396 biological_process] (2); nucleotidyltransferase activity [GO:0016779 molecular_function] (2)                                                                                                                                                                                           | Poly A polymerase, head domain [IPRO02646] (2)                                                                                                                                                                                                                                                                                                                                                             | scaffold_5_mRNA_4642.1            | C_umshii_00802_mRNA_5.1      | -                               |
| GF0022875 | 1                              | 1                         | 0                            | Hypothetical protein (1); F-actin capping protein beta subunit (1)           | F-actin capping protein complex [GO:0008290 cellular_component] (2); actin cytoskeleton organization [GO:0030036 biological_process] (2); actin binding [GO:0003779 molecular_function] (2); cytoplasm [GO:0005737 cellular_component] (2); barbed-end actin filament capping [GO:0051016 biological_process] (2)                                                  | F-actin-capping protein subunit beta [IPRO01698] (2); F-actin capping protein, beta subunit, conserved site [IPRO19771] (2)                                                                                                                                                                                                                                                                                | scaffold_5_mRNA_4619.1            | C_umshii_00495_mRNA_17.1     | -                               |
| GF0022873 | 1                              | 1                         | 0                            | Hypothetical protein (2)                                                     |                                                                                                                                                                                                                                                                                                                                                                    |                                                                                                                                                                                                                                                                                                                                                                                                            | scaffold_5_mRNA_4615.1            | C_umshii_00046_mRNA_29.1     | -                               |
| GF0022872 | 1                              | 1                         | 0                            | Hypothetical protein (2)                                                     | regulation of transcription, DNA-templated [GO:0006355 biological_process] (2)                                                                                                                                                                                                                                                                                     | FHY3/FAR1 family [IPRO31052] (2); FAR1 DNA-binding domain [IPRO04330] (2)                                                                                                                                                                                                                                                                                                                                  | scaffold_5_mRNA_4614.1            | C_umshii_00046_mRNA_28.1     | -                               |
| GF0022870 | 1                              | 1                         | 0                            | Hypothetical protein (2)                                                     |                                                                                                                                                                                                                                                                                                                                                                    |                                                                                                                                                                                                                                                                                                                                                                                                            | scaffold_5_mRNA_460.1             | C_umshii_00646_mRNA_22.1     | -                               |
| GF0022869 | 1                              | 1                         | 0                            | Hypothetical protein (2)                                                     |                                                                                                                                                                                                                                                                                                                                                                    |                                                                                                                                                                                                                                                                                                                                                                                                            | scaffold_5_mRNA_46.1              | C_umshii_00407_mRNA_25.1     | -                               |
| GF0022868 | 1                              | 1                         | 0                            | Hypothetical protein (2)                                                     | enzyme inhibitor activity [GO:0004857 molecular_function] (1)                                                                                                                                                                                                                                                                                                      | Pectinesterase inhibitor domain [IPRO06501] (1)                                                                                                                                                                                                                                                                                                                                                            | scaffold_5_mRNA_4580.1            | C_umshii_00278_mRNA_25.1     | -                               |
| GF0022867 | 1                              | 1                         | 0                            | Hypothetical protein (2)                                                     |                                                                                                                                                                                                                                                                                                                                                                    |                                                                                                                                                                                                                                                                                                                                                                                                            | scaffold_5_mRNA_4571.1            | C_umshii_00556_mRNA_1.1      | -                               |

| ID        | Num. in <i>C. celerantiae</i> | Num. in <i>C. acicola</i> | Num. in <i>P. trifoliate</i> | Note                                                                                            | GO                                                                                                                                                                                                                                                                                                                                                                                                                                                                                                                                                                                                                   | InterPro                                                                                                                                                                                                                                                                                                                                                                             | Members in <i>C. celerantiae</i> | Members in <i>C. acicola</i> | Members in <i>P. trifoliate</i> |
|-----------|-------------------------------|---------------------------|------------------------------|-------------------------------------------------------------------------------------------------|----------------------------------------------------------------------------------------------------------------------------------------------------------------------------------------------------------------------------------------------------------------------------------------------------------------------------------------------------------------------------------------------------------------------------------------------------------------------------------------------------------------------------------------------------------------------------------------------------------------------|--------------------------------------------------------------------------------------------------------------------------------------------------------------------------------------------------------------------------------------------------------------------------------------------------------------------------------------------------------------------------------------|----------------------------------|------------------------------|---------------------------------|
| GF0022865 | 1                             | 1                         | 0                            | Cupredoxin superfamily protein, putative (2)                                                    | regulation of transcription, DNA-templated [GO:0006355 biological_process] (2); DNA binding [GO:0003677 molecular_function] (2)                                                                                                                                                                                                                                                                                                                                                                                                                                                                                      | Cupredoxin [IPRO08972] (2)                                                                                                                                                                                                                                                                                                                                                           | scaffold_5_mRNA_4554.1           | C_unshiu_004301_mRNA_18.1    | -                               |
| GF0022863 | 1                             | 1                         | 0                            | Dof domain zinc finger protein (2)                                                              |                                                                                                                                                                                                                                                                                                                                                                                                                                                                                                                                                                                                                      | Zinc finger, Dof-type [IPRO03851] (2)                                                                                                                                                                                                                                                                                                                                                | scaffold_5_mRNA_4521.1           | C_unshiu_00183_mRNA_14.1     | -                               |
| GF0022862 | 1                             | 1                         | 0                            | Hypothetical protein (2)                                                                        |                                                                                                                                                                                                                                                                                                                                                                                                                                                                                                                                                                                                                      | PGG domain [IPRO26961] (2)                                                                                                                                                                                                                                                                                                                                                           | scaffold_5_mRNA_4520.1           | C_unshiu_00183_mRNA_15.1     | -                               |
| GF0022861 | 1                             | 1                         | 0                            | EF1 protein (2)                                                                                 |                                                                                                                                                                                                                                                                                                                                                                                                                                                                                                                                                                                                                      | NTF2-like domain [IPRO32710] (2)                                                                                                                                                                                                                                                                                                                                                     | scaffold_5_mRNA_4513.1           | C_unshiu_00183_mRNA_22.1     | -                               |
| GF0022859 | 1                             | 1                         | 0                            | Retransposon protein, putative, Ty1-0 copia subclass (1); Putative retroelement pol protein (1) |                                                                                                                                                                                                                                                                                                                                                                                                                                                                                                                                                                                                                      |                                                                                                                                                                                                                                                                                                                                                                                      | scaffold_5_mRNA_450.1            | C_unshiu_01064_mRNA_9.1      | -                               |
| GF0022858 | 1                             | 1                         | 0                            | Hypothetical protein (2)                                                                        | nucleic acid binding [GO:0003676 molecular_function] (1)                                                                                                                                                                                                                                                                                                                                                                                                                                                                                                                                                             | Ribonuclease H-like domain [IPRO12337] (1)                                                                                                                                                                                                                                                                                                                                           | scaffold_5_mRNA_4498.1           | C_unshiu_00183_mRNA_39.1     | -                               |
| GF0022857 | 1                             | 1                         | 0                            | Hypothetical protein (2)                                                                        | nucleic acid binding [GO:0003676 molecular_function] (2); zinc ion binding [GO:0008270 molecular_function] (1)                                                                                                                                                                                                                                                                                                                                                                                                                                                                                                       | Reverse transcriptase zinc-binding domain [IPRO26960] (2); Zinc knuckle CX2CX4HX4C [IPRO25836] (1); Zinc finger, CCHC-type [IPRO01878] (1); Ribonuclease H-like domain [IPRO12337] (1)                                                                                                                                                                                               | scaffold_5_mRNA_4492.1           | C_unshiu_00183_mRNA_45.1     | -                               |
| GF0022856 | 1                             | 1                         | 0                            | Geraniol dehydrogenase 1 (2)                                                                    | oxidation-reduction process [GO:005114 biological_process] (2); oxidoreductase activity [GO:0016491 molecular_function] (1); zinc ion binding [GO:0008270 molecular_function] (1)                                                                                                                                                                                                                                                                                                                                                                                                                                    | GroES-like [IPRO11032] (2); Alcohol dehydrogenase, N-terminal [IPRO13154] (2); NAD(P)-binding domain [IPRO16040] (1); Alcohol dehydrogenase superfamily, zinc-type [IPRO2085] (1)                                                                                                                                                                                                    | scaffold_5_mRNA_4485.1           | C_unshiu_00319_mRNA_40.1     | -                               |
| GF0022855 | 1                             | 1                         | 0                            | Hypothetical protein (2)                                                                        | protein dimerization activity [GO:0046983 molecular_function] (2)                                                                                                                                                                                                                                                                                                                                                                                                                                                                                                                                                    | NAD(P)-binding domain [IPRO16040] (2); Winged helix-helix DNA-binding domain [IPRO11991] (2); NtrA-like domain [IPRO08030] (2); Plant methyltransferase dimerization [IPRO12967] (2)                                                                                                                                                                                                 | scaffold_5_mRNA_4482.1           | C_unshiu_00319_mRNA_37.1     | -                               |
| GF0022854 | 1                             | 1                         | 0                            | Hypothetical protein (2)                                                                        |                                                                                                                                                                                                                                                                                                                                                                                                                                                                                                                                                                                                                      | Leucine-rich repeat domain, I domain-like [IPRO32675] (2)                                                                                                                                                                                                                                                                                                                            | scaffold_5_mRNA_447.1            | C_unshiu_01064_mRNA_6.1      | -                               |
| GF0022853 | 1                             | 1                         | 0                            | Hypothetical protein (2)                                                                        | protein kinase activity [GO:0004672 molecular_function] (2); protein phosphorylation [GO:0006468 biological_process] (2); ATP binding [GO:0005524 molecular_function] (2)                                                                                                                                                                                                                                                                                                                                                                                                                                            | Protein kinase, ATP binding site [IPRO17441] (2); Protein kinase-like domain [IPRO11009] (2); Protein kinase domain [IPRO00719] (2); Serine/threonine/dual specificity protein kinase, catalytic domain [IPRO02290] (1)                                                                                                                                                              | scaffold_5_mRNA_4456.1           | C_unshiu_02773_mRNA_1.1      | -                               |
| GF0022852 | 1                             | 1                         | 0                            | Hypothetical protein (2)                                                                        |                                                                                                                                                                                                                                                                                                                                                                                                                                                                                                                                                                                                                      |                                                                                                                                                                                                                                                                                                                                                                                      | scaffold_5_mRNA_4451.1           | C_unshiu_00238_mRNA_36.1     | -                               |
| GF0022851 | 1                             | 1                         | 0                            | Hypothetical protein (2)                                                                        |                                                                                                                                                                                                                                                                                                                                                                                                                                                                                                                                                                                                                      | Zinc finger, RING-type [IPRO01841] (2); WD40/YVTN repeat-like-containing domain [IPRO15943] (2); WD40 repeat [IPRO01680] (2); WD40-repeat-containing domain [IPRO17986] (2); Protein kinase-like domain [IPRO11009] (2); Zinc finger, RING-FYVE/PHD-type [IPRO13083] (2); G-protein beta WD40 repeat [IPRO04472] (1); RING-type zinc-finger, Lish dimerization motif [IPRO27370] (1) | scaffold_5_mRNA_4449.1           | C_unshiu_00277_mRNA_6.1      | -                               |
| GF0022850 | 1                             | 1                         | 0                            | Preprotein translocase SecA family protein, putative isoform 8 (2)                              | zinc ion binding [GO:0008270 molecular_function] (2); protein binding [GO:0005515 molecular_function] (2)                                                                                                                                                                                                                                                                                                                                                                                                                                                                                                            |                                                                                                                                                                                                                                                                                                                                                                                      | scaffold_5_mRNA_4418.1           | C_unshiu_00238_mRNA_7.1      | -                               |
| GF0022849 | 1                             | 1                         | 0                            | Acyl-CoA N-acyltransferases (NAT) superfamily protein isoform 1 (2)                             |                                                                                                                                                                                                                                                                                                                                                                                                                                                                                                                                                                                                                      | YjdP-type Gcn5-related N-acyltransferase [IPRO31165] (2); Acyl-CoA N-acyltransferase [IPRO16181] (2)                                                                                                                                                                                                                                                                                 | scaffold_5_mRNA_4382.1           | C_unshiu_00477_mRNA_19.1     | -                               |
| GF0022847 | 1                             | 1                         | 0                            | Small glutamine-rich tetrapeptide repeat-containing protein alpha (2)                           | protein binding [GO:0005515 molecular_function] (2)                                                                                                                                                                                                                                                                                                                                                                                                                                                                                                                                                                  | Tetrapeptide-like helical domain [IPRO11990] (2); Tetrapeptide repeat 2 [IPRO13105] (2); Tetrapeptide repeat [IPRO19734] (2); Tetrapeptide repeat-containing domain [IPRO13026] (2)                                                                                                                                                                                                  | scaffold_5_mRNA_4363.1           | C_unshiu_00144_mRNA_7.1      | -                               |
| GF0022846 | 1                             | 1                         | 0                            | Hypothetical protein (2)                                                                        |                                                                                                                                                                                                                                                                                                                                                                                                                                                                                                                                                                                                                      | Aspartic peptidase domain [IPRO21109] (1)                                                                                                                                                                                                                                                                                                                                            | scaffold_5_mRNA_436.1            | C_unshiu_00378_mRNA_6.1      | -                               |
| GF0022845 | 1                             | 1                         | 0                            | Hypothetical protein (2)                                                                        |                                                                                                                                                                                                                                                                                                                                                                                                                                                                                                                                                                                                                      |                                                                                                                                                                                                                                                                                                                                                                                      | scaffold_5_mRNA_4355.1           | C_unshiu_02644_mRNA_3.1      | -                               |
| GF0022842 | 1                             | 1                         | 0                            | Putative calcium-binding protein CML25 (1)                                                      | calcium ion binding [GO:0005509 molecular_function] (2)                                                                                                                                                                                                                                                                                                                                                                                                                                                                                                                                                              | EF-hand domain pair [IPRO11992] (2); EF-hand 1, calcium-binding site [IPRO18247] (2); EF-hand domain [IPRO02048] (2)                                                                                                                                                                                                                                                                 | scaffold_5_mRNA_4308.1           | C_unshiu_00088_mRNA_11.1     | -                               |
| GF0022841 | 1                             | 1                         | 0                            | Glycosyl hydrolase family 17 family protein (1); Hypothetical protein (1)                       | hydrolase activity, hydrolyzing O-glycosyl compounds [GO:0004553 molecular_function] (1); carbohydrate metabolic process [GO:0005975 biological_process] (1)                                                                                                                                                                                                                                                                                                                                                                                                                                                         | Glycoside hydrolase superfamily [IPRO17853] (2); Glycoside hydrolase family 17 [IPRO00490] (1); Glycoside hydrolase, catalytic domain [IPRO13781] (1)                                                                                                                                                                                                                                | scaffold_5_mRNA_4303.1           | C_unshiu_00088_mRNA_18.1     | -                               |
| GF0022840 | 1                             | 1                         | 0                            | Transmembrane protein 50A (2)                                                                   |                                                                                                                                                                                                                                                                                                                                                                                                                                                                                                                                                                                                                      | Uncharacterized protein family UPP0220 [IPRO07919] (2)                                                                                                                                                                                                                                                                                                                               | scaffold_5_mRNA_4300.1           | C_unshiu_00088_mRNA_20.1     | -                               |
| GF0022839 | 1                             | 1                         | 0                            | Hypothetical protein (2)                                                                        |                                                                                                                                                                                                                                                                                                                                                                                                                                                                                                                                                                                                                      | DNA-binding pseudobarrel domain [IPRO15300] (2)                                                                                                                                                                                                                                                                                                                                      | scaffold_5_mRNA_43.1             | C_unshiu_00231_mRNA_2.1      | -                               |
| GF0022837 | 1                             | 1                         | 0                            | Galactosyltransferase family protein (2)                                                        | galactosyltransferase activity [GO:0008378 molecular_function] (2); membrane [GO:0016020 cellular_component] (2); protein glycosylation [GO:0006486 biological_process] (2)                                                                                                                                                                                                                                                                                                                                                                                                                                          | Domain of unknown function DUF4094 [IPRO25298] (2); Glycosyltransferase, family 31 [IPRO02659] (2)                                                                                                                                                                                                                                                                                   | scaffold_5_mRNA_4296.1           | C_unshiu_00088_mRNA_23.1     | -                               |
| GF0022836 | 1                             | 1                         | 0                            | Hypothetical protein (2)                                                                        |                                                                                                                                                                                                                                                                                                                                                                                                                                                                                                                                                                                                                      |                                                                                                                                                                                                                                                                                                                                                                                      | scaffold_5_mRNA_429.1            | C_unshiu_00378_mRNA_28.1     | -                               |
| GF0022835 | 1                             | 1                         | 0                            | Hypothetical protein (2)                                                                        |                                                                                                                                                                                                                                                                                                                                                                                                                                                                                                                                                                                                                      |                                                                                                                                                                                                                                                                                                                                                                                      | scaffold_5_mRNA_428.1            | C_unshiu_00378_mRNA_27.1     | -                               |
| GF0022832 | 1                             | 1                         | 0                            | Farnesylated protein 2 (2)                                                                      | metal ion transport [GO:0030001 biological_process] (2); metal ion binding [GO:0046872 molecular_function] (2)                                                                                                                                                                                                                                                                                                                                                                                                                                                                                                       | Heavy metal-associated domain, HMA [IPRO06121] (2)                                                                                                                                                                                                                                                                                                                                   | scaffold_5_mRNA_4266.1           | C_unshiu_00088_mRNA_45.1     | -                               |
| GF0022831 | 1                             | 1                         | 0                            | Hypothetical protein (1); MADS-box protein AGL66 (1)                                            | RNA polymerase II regulatory region sequence-specific DNA binding [GO:0000977 molecular_function] (1); DNA binding [GO:0003677 molecular_function] (1); nucleus [GO:0005634 cellular_component] (1); protein dimerization activity [GO:0046983 molecular_function] (1); transcription factor activity, sequence-specific DNA binding [GO:0003700 molecular_function] (1); MAPK cascade [GO:0000165 biological_process] (1); positive regulation of transcription from RNA polymerase II promoter [GO:0045944 biological_process] (1); regulation of transcription, DNA-templated [GO:0006355 biological_process] (1) | Transcription factor, MADS-box [IPRO02100] (1); Transcription factor, K-box [IPRO02457] (1); MADS-MEF2-like [IPRO33896] (1)                                                                                                                                                                                                                                                          | scaffold_5_mRNA_4265.1           | C_unshiu_00088_mRNA_46.1     | -                               |
| GF0022830 | 1                             | 1                         | 0                            | 2,3-bisphosphoglycerate-dependent phosphoglycerate mutase (2)                                   | metabolic process [GO:0008152 biological_process] (2); intramolecular transferase activity, phosphotransferases [GO:0016808 molecular_function] (2); catalytic activity [GO:0003824 molecular_function] (2); phosphoglycerate mutase activity [GO:0004619 molecular_function] (2); glycolytic process [GO:0006096 biological_process] (2)                                                                                                                                                                                                                                                                            | Histidine phosphatase superfamily, clade-1 [IPRO13078] (2); Phosphoglycerate bisphosphoglycerate mutase, active site [IPRO01345] (2); Histidine phosphatase superfamily [IPRO29033] (2); Phosphoglycerate mutase 1 [IPRO05952] (2)                                                                                                                                                   | scaffold_5_mRNA_4254.1           | C_unshiu_00088_mRNA_64.1     | -                               |
| GF0022829 | 1                             | 1                         | 0                            | Monooxyglycerol lipase ABHD6 (2)                                                                | catalytic activity [GO:0003824 molecular_function] (2)                                                                                                                                                                                                                                                                                                                                                                                                                                                                                                                                                               | Alpha/beta hydrolase fold-1 [IPRO00073] (2); Alpha/beta hydrolase fold [IPRO29058] (2); Epoxide hydrolase-like [IPRO00639] (2); Alpha/beta hydrolase fold-5 [IPRO29059] (1)                                                                                                                                                                                                          | scaffold_5_mRNA_4218.1           | C_unshiu_00241_mRNA_14.1     | -                               |
| GF0022825 | 1                             | 1                         | 0                            | Hypothetical protein (2)                                                                        |                                                                                                                                                                                                                                                                                                                                                                                                                                                                                                                                                                                                                      |                                                                                                                                                                                                                                                                                                                                                                                      | scaffold_5_mRNA_421.1            | C_unshiu_00059_mRNA_40.1     | -                               |
| GF0022824 | 1                             | 1                         | 0                            | UDP-glucosyltransferase 85A1 (2)                                                                | transferase activity, transferring hexosyl groups [GO:0016758 molecular_function] (2); metabolic process [GO:0008152 biological_process] (2)                                                                                                                                                                                                                                                                                                                                                                                                                                                                         | UDP-glucosyltransferase [IPRO02213] (2)                                                                                                                                                                                                                                                                                                                                              | scaffold_5_mRNA_4205.1           | C_unshiu_02009_mRNA_2.1      | -                               |
| GF0022823 | 1                             | 1                         | 0                            | Hypothetical protein (2)                                                                        |                                                                                                                                                                                                                                                                                                                                                                                                                                                                                                                                                                                                                      | Phosphate-induced protein 1 [IPRO06766] (2)                                                                                                                                                                                                                                                                                                                                          | scaffold_5_mRNA_4203.1           | C_unshiu_02009_mRNA_3.1      | -                               |
| GF0022822 | 1                             | 1                         | 0                            | Hypothetical protein (2)                                                                        |                                                                                                                                                                                                                                                                                                                                                                                                                                                                                                                                                                                                                      |                                                                                                                                                                                                                                                                                                                                                                                      | scaffold_5_mRNA_4179.1           | C_unshiu_00406_mRNA_25.1     | -                               |
| GF0022819 | 1                             | 1                         | 0                            | Putative MATE efflux family protein (2)                                                         | transmembrane transport [LAJ002083 biological_process] (2); drug transmembrane transport [GO:0006855 biological_process] (2); antiporter activity [GO:0015297 molecular_function] (2); drug transmembrane transporter activity [GO:0015238 molecular_function] (2); membrane [GO:0016020 cellular_component] (2)                                                                                                                                                                                                                                                                                                     | Multi antimicrobial extrusion protein [IPRO02528] (2)                                                                                                                                                                                                                                                                                                                                | scaffold_5_mRNA_4159.1           | C_unshiu_02304_mRNA_4.1      | -                               |
| GF0022814 | 1                             | 1                         | 0                            | Hypothetical protein (2)                                                                        |                                                                                                                                                                                                                                                                                                                                                                                                                                                                                                                                                                                                                      |                                                                                                                                                                                                                                                                                                                                                                                      | scaffold_5_mRNA_4131.1           | C_unshiu_00255_mRNA_12.1     | -                               |
| GF0022813 | 1                             | 1                         | 0                            | Hypothetical protein (1); Peptide repeat ORF protein (1)                                        |                                                                                                                                                                                                                                                                                                                                                                                                                                                                                                                                                                                                                      |                                                                                                                                                                                                                                                                                                                                                                                      | scaffold_5_mRNA_4130.1           | C_unshiu_00255_mRNA_11.1     | -                               |
| GF0022812 | 1                             | 1                         | 0                            | Putative ORF protein (1); Anomalous RNA small subunit methyltransferase A (1)                   |                                                                                                                                                                                                                                                                                                                                                                                                                                                                                                                                                                                                                      |                                                                                                                                                                                                                                                                                                                                                                                      | scaffold_5_mRNA_4128.1           | C_unshiu_00255_mRNA_9.1      | -                               |
| GF0022811 | 1                             | 1                         | 0                            | Hypothetical protein (1); Putative CAI-1 autoinducer sensor kinase/phosphatase cqsK-like (1)    | zinc ion binding [GO:0008270 molecular_function] (1); nucleic acid binding [GO:0003676 molecular_function] (1)                                                                                                                                                                                                                                                                                                                                                                                                                                                                                                       | Harbinger transposase-derived nuclease domain [IPRO27806] (2); Zinc finger, CCHC-type [IPRO08791] (1)                                                                                                                                                                                                                                                                                | scaffold_5_mRNA_4113.1           | C_unshiu_00718_mRNA_10.1     | -                               |
| GF0022810 | 1                             | 1                         | 0                            | Hypothetical protein (1); Putative CAI-1 autoinducer sensor kinase/phosphatase cqsK-like (1)    | zinc ion binding [GO:0008270 molecular_function] (1); nucleic acid binding [GO:0003676 molecular_function] (1)                                                                                                                                                                                                                                                                                                                                                                                                                                                                                                       | Harbinger transposase-derived nuclease domain [IPRO27806] (2); Zinc finger, CCHC-type [IPRO08791] (1)                                                                                                                                                                                                                                                                                | scaffold_5_mRNA_410.1            | C_unshiu_01699_mRNA_4.1      | -                               |
| GF0022806 | 1                             | 1                         | 0                            | Ankyrin repeat protein (2)                                                                      | protein binding [GO:0005515 molecular_function] (2)                                                                                                                                                                                                                                                                                                                                                                                                                                                                                                                                                                  | Ankyrin repeat [IPRO02110] (2); Ankyrin repeat-containing domain [IPRO20683] (2); PGG domain [IPRO26961] (2)                                                                                                                                                                                                                                                                         | scaffold_5_mRNA_408.1            | C_unshiu_00664_mRNA_1.1      | -                               |
| GF0022805 | 1                             | 1                         | 0                            | Hypothetical protein (2)                                                                        |                                                                                                                                                                                                                                                                                                                                                                                                                                                                                                                                                                                                                      |                                                                                                                                                                                                                                                                                                                                                                                      | scaffold_5_mRNA_4075.1           | C_unshiu_00042_mRNA_50.1     | -                               |

| ID        | Num. in <i>C. clementiae</i> | Num. in <i>C. acutis</i> | Num. in <i>P. frydlandae</i> | Note                                                                                           | GO                                                                                                                                                                                                                                                                                                                                                           | InterPro                                                                                                                                                                                                                                      | Members in <i>C. clementiae</i> | Members in <i>C. acutis</i> | Members in <i>P. frydlandae</i> |
|-----------|------------------------------|--------------------------|------------------------------|------------------------------------------------------------------------------------------------|--------------------------------------------------------------------------------------------------------------------------------------------------------------------------------------------------------------------------------------------------------------------------------------------------------------------------------------------------------------|-----------------------------------------------------------------------------------------------------------------------------------------------------------------------------------------------------------------------------------------------|---------------------------------|-----------------------------|---------------------------------|
| GF0022802 | 1                            | 1                        | 0                            | Hypothetical protein (2)                                                                       | NAD <sup>+</sup> ADP-ribosyltransferase activity [GO:000590 molecular_function] (2); structural constituent of ribosome [GO:003735 molecular_function] (2); translation [GO:0006412 biological_process] (2); rRNA binding [GO:0019843 molecular_function] (2); ribosome [GO:0005840 cellular_component] (2); chloroplast [GO:0009507 cellular_component] (2) | Poly(ADP-ribose) polymerase, catalytic domain [IPRO12317] (2)                                                                                                                                                                                 | scaffold_5_mRNA_4048.1          | C_unshiu_00042_mRNA_20.1    | -                               |
| GF0022801 | 1                            | 1                        | 0                            | 50S ribosomal protein 6, chloroplast (2)                                                       | biological_process [GO:0009507 cellular_component] (2); rRNA binding [GO:0019843 molecular_function] (2); ribosome [GO:0005840 cellular_component] (2); chloroplast [GO:0009507 cellular_component] (2)                                                                                                                                                      | Ribosomal protein L6, chloroplast [IPRO20526] (2)                                                                                                                                                                                             | scaffold_5_mRNA_4046.1          | C_unshiu_00042_mRNA_18.1    | -                               |
| GF0022800 | 1                            | 1                        | 0                            | Hypothetical protein (2)                                                                       | protein binding [GO:0005515 molecular_function] (1)                                                                                                                                                                                                                                                                                                          | Pentatricopeptide repeat [IPRO02885] (2); Tetra-tricopeptide-like helical domain [IPRO11990] (1)                                                                                                                                              | scaffold_5_mRNA_404.1           | C_unshiu_00664_mRNA_9.1     | -                               |
| GF0022799 | 1                            | 1                        | 0                            | F-box protein interaction domain protein (2)                                                   | protein binding [GO:0005515 molecular_function] (2)                                                                                                                                                                                                                                                                                                          | F-box domain [IPRO01810] (2); F-box associated interaction domain [IPRO17451] (2)                                                                                                                                                             | scaffold_5_mRNA_4034.1          | C_unshiu_00484_mRNA_3.1     | -                               |
| GF0022797 | 1                            | 1                        | 0                            | Hypothetical protein (2)                                                                       |                                                                                                                                                                                                                                                                                                                                                              | Retrotransposon gag domain [IPRO05162] (2)                                                                                                                                                                                                    | scaffold_5_mRNA_403.1           | C_unshiu_00664_mRNA_8.1     | -                               |
| GF0022795 | 1                            | 1                        | 0                            | Hephaloheptin protein (2)                                                                      | integral component of membrane [GO:0016021 cellular_component] (2)                                                                                                                                                                                                                                                                                           | Adipor/Hsemolysin-III-related [IPRO04254] (2)                                                                                                                                                                                                 | scaffold_5_mRNA_4003.1          | C_unshiu_00190_mRNA_13.1    | -                               |
| GF0022793 | 1                            | 1                        | 0                            | Transcription factor bHLH85 (2)                                                                | protein dimerization activity [GO:0046983 molecular_function] (2)                                                                                                                                                                                                                                                                                            | Mye-type, basic, helix-loop-helix (bHLH) domain [IPRO11598] (2)                                                                                                                                                                               | scaffold_5_mRNA_3984.1          | C_unshiu_00190_mRNA_32.1    | -                               |
| GF0022792 | 1                            | 1                        | 0                            | Hypothetical protein (1); Elongation factor 4 (1)                                              |                                                                                                                                                                                                                                                                                                                                                              |                                                                                                                                                                                                                                               | scaffold_5_mRNA_3978.1          | C_unshiu_00190_mRNA_38.1    | -                               |
| GF0022791 | 1                            | 1                        | 0                            | Hypothetical protein (2)                                                                       | regulation of transcription, DNA-templated [GO:0006355 biological_process] (1)                                                                                                                                                                                                                                                                               | FHY3/FAR1 family [IPRO31052] (1)                                                                                                                                                                                                              | scaffold_5_mRNA_3963.1          | C_unshiu_02775_mRNA_2.1     | -                               |
| GF0022790 | 1                            | 1                        | 0                            | Hypothetical protein (2)                                                                       |                                                                                                                                                                                                                                                                                                                                                              |                                                                                                                                                                                                                                               | scaffold_5_mRNA_3960.1          | C_unshiu_00321_mRNA_17.1    | -                               |
| GF0022788 | 1                            | 1                        | 0                            | Hypothetical protein (2)                                                                       |                                                                                                                                                                                                                                                                                                                                                              |                                                                                                                                                                                                                                               | scaffold_5_mRNA_3941.1          | C_unshiu_02182_mRNA_2.1     | -                               |
| GF0022787 | 1                            | 1                        | 0                            | Hypothetical protein (2)                                                                       |                                                                                                                                                                                                                                                                                                                                                              |                                                                                                                                                                                                                                               | scaffold_5_mRNA_394.1           | C_unshiu_00397_mRNA_2.1     | -                               |
| GF0022786 | 1                            | 1                        | 0                            | Hypothetical protein (2)                                                                       |                                                                                                                                                                                                                                                                                                                                                              |                                                                                                                                                                                                                                               | scaffold_5_mRNA_3919.1          | C_unshiu_00067_mRNA_60.1    | -                               |
| GF0022785 | 1                            | 1                        | 0                            | Hypothetical protein (2)                                                                       |                                                                                                                                                                                                                                                                                                                                                              | Munc13 homology 1 [IPRO14770] (2); Protein of unknown function DU810 [IPRO05531] (2)                                                                                                                                                          | scaffold_5_mRNA_3918.1          | C_unshiu_00067_mRNA_61.1    | -                               |
| GF0022784 | 1                            | 1                        | 0                            | Hypothetical protein (2)                                                                       | nucleic acid binding [GO:0003676 molecular_function] (2)                                                                                                                                                                                                                                                                                                     | Ribonuclease H-like domain [IPRO12337] (2)                                                                                                                                                                                                    | scaffold_5_mRNA_3917.1          | C_unshiu_00067_mRNA_62.1    | -                               |
| GF0022782 | 1                            | 1                        | 0                            | Ankyrin repeat family protein, putative (1); Ankyrin repeat protein (1)                        | protein binding [GO:0005515 molecular_function] (2)                                                                                                                                                                                                                                                                                                          | Ankyrin repeat-containing domain [IPRO20683] (2); PFG domain [IPRO26961] (2); Ankyrin repeat [IPRO02110] (2)                                                                                                                                  | scaffold_5_mRNA_390.1           | C_unshiu_00165_mRNA_20.1    | -                               |
| GF0022781 | 1                            | 1                        | 0                            | Hypothetical protein (2)                                                                       |                                                                                                                                                                                                                                                                                                                                                              |                                                                                                                                                                                                                                               | scaffold_5_mRNA_388.1           | C_unshiu_00165_mRNA_24.1    | -                               |
| GF0022779 | 1                            | 1                        | 0                            | Hypothetical protein (2)                                                                       |                                                                                                                                                                                                                                                                                                                                                              |                                                                                                                                                                                                                                               | scaffold_5_mRNA_385.1           | C_unshiu_00165_mRNA_27.1    | -                               |
| GF0022778 | 1                            | 1                        | 0                            | Hypothetical protein (2)                                                                       |                                                                                                                                                                                                                                                                                                                                                              |                                                                                                                                                                                                                                               | scaffold_5_mRNA_384.1           | C_unshiu_01774_mRNA_4.1     | -                               |
| GF0022777 | 1                            | 1                        | 0                            | Epoxide hydrolase 2 (2)                                                                        | catalytic activity [GO:0003824 molecular_function] (2)                                                                                                                                                                                                                                                                                                       | Alpha/beta hydrolase fold-1 [IPRO00073] (2); Alpha/Beta hydrolase fold [IPRO29058] (2); Epoxide hydrolase-like [IPRO00639] (2)                                                                                                                | scaffold_5_mRNA_384.1           | C_unshiu_01107_mRNA_4.1     | -                               |
| GF0022775 | 1                            | 1                        | 0                            | Hypothetical protein (2)                                                                       |                                                                                                                                                                                                                                                                                                                                                              |                                                                                                                                                                                                                                               | scaffold_5_mRNA_3821.1          | C_unshiu_00170_mRNA_2.1     | -                               |
| GF0022774 | 1                            | 1                        | 0                            | Hypothetical protein (2)                                                                       |                                                                                                                                                                                                                                                                                                                                                              |                                                                                                                                                                                                                                               | scaffold_5_mRNA_3820.1          | C_unshiu_00214_mRNA_48.1    | -                               |
| GF0022772 | 1                            | 1                        | 0                            | Translationally-controlled tumor protein homolog (2)                                           |                                                                                                                                                                                                                                                                                                                                                              | Translationally controlled tumour protein, conserved site [IPRO18105] (2); Mod/translationally controlled tumour-associated TCTP [IPRO11323] (1); Translationally controlled tumour protein (TCTP) domain [IPRO34737] (1)                     | scaffold_5_mRNA_3799.1          | C_unshiu_00214_mRNA_33.1    | -                               |
| GF0022771 | 1                            | 1                        | 0                            | Hypothetical protein (1); Desiccation PCC13-like protein (1)                                   |                                                                                                                                                                                                                                                                                                                                                              | Ferritin-related [IPRO12347] (1)                                                                                                                                                                                                              | scaffold_5_mRNA_3784.1          | C_unshiu_00214_mRNA_21.1    | -                               |
| GF0022770 | 1                            | 1                        | 0                            | Zinc finger protein MAGP2 (E)                                                                  | nucleic acid binding [GO:0003676 molecular_function] (2); metal ion binding [GO:0046872 molecular_function] (1)                                                                                                                                                                                                                                              | Zinc finger C2H2-type [IPRO13087] (1); Zinc finger C2H2 [IPRO07087] (1); Zinc finger C2H2-type/integrase DNA-binding domain [IPRO13087] (1); Zinc finger, C2H2-like [IPRO15880] (1); Zinc finger, double-stranded RNA binding [IPRO22755] (1) | scaffold_5_mRNA_3770.1          | C_unshiu_00214_mRNA_6.1     | -                               |
| GF0022769 | 1                            | 1                        | 0                            | Hypothetical protein (2)                                                                       | catalytic activity [GO:0003824 molecular_function] (2); fatty acid biosynthetic process [GO:0006033 biological_process] (2); transferase activity, transferring acyl groups other than amino-acyl groups [GO:016747 molecular_function] (2); membrane [GO:0016020 cellular_component] (2); metabolic process [GO:0008152 biological_process] (2)             | 3-Oxoacyl-acyl-carrier-protein (ACP) synthase III, C-terminal [IPRO13747] (2); FAE1/Type III polyketide synthase-like protein [IPRO13601] (2); Very-long-chain 3-oxoacyl-CoA synthase [IPRO12392] (2); Thiolase-like [IPRO16039] (2)          | scaffold_5_mRNA_3765.1          | C_unshiu_00214_mRNA_1.1     | -                               |
| GF0022765 | 1                            | 1                        | 0                            | Hypothetical protein (2)                                                                       |                                                                                                                                                                                                                                                                                                                                                              | Arabidopsis retrotransposon On1 [IPRO04312] (2)                                                                                                                                                                                               | scaffold_5_mRNA_376.1           | C_unshiu_00328_mRNA_8.1     | -                               |
| GF0022764 | 1                            | 1                        | 0                            | Hypothetical protein (2)                                                                       |                                                                                                                                                                                                                                                                                                                                                              | Protein kinase domain [IPRO00719] (2); Protein kinase-like domain [IPRO11009] (2); Serine-threonine/tyrosine-protein kinase, catalytic domain [IPRO01245] (1); Serine-threonine/tyrosine-protein kinase catalytic domain [IPRO01245] (1)      | scaffold_5_mRNA_3745.1          | C_unshiu_00907_mRNA_3.1     | -                               |
| GF0022762 | 1                            | 1                        | 0                            | Hypothetical protein (2)                                                                       | ATP binding [GO:0005524 molecular_function] (2); protein kinase activity [GO:0004672 molecular_function] (2); protein phosphorylation [GO:0006468 biological_process] (2)                                                                                                                                                                                    |                                                                                                                                                                                                                                               | scaffold_5_mRNA_3733.1          | C_unshiu_00229_mRNA_24.1    | -                               |
| GF0022761 | 1                            | 1                        | 0                            | Hypothetical protein (2)                                                                       | nucleosome [GO:0000786 cellular_component] (2); DNA binding [GO:0003677 molecular_function] (2); protein heterodimerization activity [GO:0046982 molecular_function] (1)                                                                                                                                                                                     | Histone H3/CENP-A [IPRO00164] (2); Histone-fold [IPRO00972] (1)                                                                                                                                                                               | scaffold_5_mRNA_373.1           | C_unshiu_00328_mRNA_7.1     | -                               |
| GF0022758 | 1                            | 1                        | 0                            | Hypothetical protein (2)                                                                       |                                                                                                                                                                                                                                                                                                                                                              | HSP20-like chaperone [IPRO08978] (1)                                                                                                                                                                                                          | scaffold_5_mRNA_370.1           | C_unshiu_00328_mRNA_4.1     | -                               |
| GF0022756 | 1                            | 1                        | 0                            | Hypothetical protein (2)                                                                       |                                                                                                                                                                                                                                                                                                                                                              |                                                                                                                                                                                                                                               | scaffold_5_mRNA_3684.1          | C_unshiu_00224_mRNA_31.1    | -                               |
| GF0022755 | 1                            | 1                        | 0                            | Hypothetical protein (2)                                                                       |                                                                                                                                                                                                                                                                                                                                                              |                                                                                                                                                                                                                                               | scaffold_5_mRNA_3683.1          | C_unshiu_00224_mRNA_30.1    | -                               |
| GF0022753 | 1                            | 1                        | 0                            | Hypothetical protein (2)                                                                       |                                                                                                                                                                                                                                                                                                                                                              | Reverse transcriptase, RNA-dependent DNA polymerase [IPRO13103] (1)                                                                                                                                                                           | scaffold_5_mRNA_3662.1          | C_unshiu_00213_mRNA_53.1    | -                               |
| GF0022751 | 1                            | 1                        | 0                            | Hypothetical protein (2)                                                                       | protein binding [GO:0005515 molecular_function] (2); mRNA splicing via spliceosome [GO:0000398 biological_process] (1)                                                                                                                                                                                                                                       | Tetratricopeptide-like helical domain [IPRO11990] (2); Pre-mRNA-processing factor 6/Ppl1/STAF [IPRO27108] (1)                                                                                                                                 | scaffold_5_mRNA_3660.1          | C_unshiu_00224_mRNA_7.1     | -                               |
| GF0022750 | 1                            | 1                        | 0                            | Hypothetical protein (2)                                                                       | protein binding [GO:0005515 molecular_function] (2); mRNA splicing via spliceosome [GO:0000398 biological_process] (2); RNA processing [GO:0006396 biological_process] (1)                                                                                                                                                                                   | Tetratricopeptide-like helical domain [IPRO11990] (2); Pre-mRNA-processing factor 6/Ppl1/STAF [IPRO27108] (2); HAT (Half-A-TPR) repeat [IPRO03107] (1); Tetratricopeptide repeat-containing domain [IPRO13026] (1)                            | scaffold_5_mRNA_3659.1          | C_unshiu_00224_mRNA_6.1     | -                               |
| GF0022749 | 1                            | 1                        | 0                            | Hypothetical protein (2)                                                                       |                                                                                                                                                                                                                                                                                                                                                              |                                                                                                                                                                                                                                               | scaffold_5_mRNA_3656.1          | C_unshiu_00224_mRNA_1.1     | -                               |
| GF0022748 | 1                            | 1                        | 0                            | Inosine-uridine preferring nucleoside hydrolase (2)                                            | signal transducer activity [GO:0004871 molecular_function] (2); phosphorylation signal transduction system [GO:0000166 biological_process] (2)                                                                                                                                                                                                               | Inosine/uridine-preferring nucleoside hydrolase [IPRO23186] (2); Inosine/uridine-preferring nucleoside hydrolase domain [IPRO01910] (2)                                                                                                       | scaffold_5_mRNA_3629.1          | C_unshiu_00453_mRNA_3.1     | -                               |
| GF0022747 | 1                            | 1                        | 0                            | Histidine-containing phosphotransfer protein 4 (2)                                             |                                                                                                                                                                                                                                                                                                                                                              | Signal transduction histidine kinase, phosphotransfer (Hpt) domain [IPRO08207] (2)                                                                                                                                                            | scaffold_5_mRNA_3627.1          | C_unshiu_00226_mRNA_4.1     | -                               |
| GF0022745 | 1                            | 1                        | 0                            | Hypothetical protein (2)                                                                       | integral component of membrane [GO:0016021 cellular_component] (2); transmembrane transporter activity [GO:0022857 molecular_function] (2); transmembrane transport [GO:0055085 biological_process] (2)                                                                                                                                                      | Major facilitator, sugar transporter-like [IPRO05238] (2); Major facilitator superfamily domain [IPRO20846] (2)                                                                                                                               | scaffold_5_mRNA_3623.1          | C_unshiu_01771_mRNA_8.1     | -                               |
| GF0022744 | 1                            | 1                        | 0                            | Hypothetical protein (1); Sugar transporter ERD6-like 16 (1)                                   |                                                                                                                                                                                                                                                                                                                                                              |                                                                                                                                                                                                                                               | scaffold_5_mRNA_3621.1          | C_unshiu_00226_mRNA_1.1     | -                               |
| GF0022741 | 1                            | 1                        | 0                            | Hypothetical protein (2)                                                                       |                                                                                                                                                                                                                                                                                                                                                              |                                                                                                                                                                                                                                               | scaffold_5_mRNA_358.1           | C_unshiu_00036_mRNA_72.1    | -                               |
| GF0022740 | 1                            | 1                        | 0                            | Hypothetical protein (2)                                                                       | regulation of transcription, DNA-templated [GO:0006355 biological_process] (2); transcription factor activity, sequence-specific DNA binding [GO:0003700 molecular_function] (2); DNA binding [GO:0003677 molecular_function] (2)                                                                                                                            | AP2/ERF domain [IPRO01471] (2); DNA-binding domain [IPRO01617] (2); Frigida-like [IPRO12474] (1)                                                                                                                                              | scaffold_5_mRNA_3546.1          | C_unshiu_00433_mRNA_23.1    | -                               |
| GF0022736 | 1                            | 1                        | 0                            | Hypothetical protein (2)                                                                       |                                                                                                                                                                                                                                                                                                                                                              |                                                                                                                                                                                                                                               | scaffold_5_mRNA_3506.1          | C_unshiu_00339_mRNA_22.1    | -                               |
| GF0022735 | 1                            | 1                        | 0                            | Hypothetical protein (2)                                                                       |                                                                                                                                                                                                                                                                                                                                                              | Frigida-like [IPRO12474] (2); DYW domain [IPRO32867] (2); Tetratricopeptide-like helical domain [IPRO11990] (2); Pentatricopeptide repeat [IPRO02885] (2)                                                                                     | scaffold_5_mRNA_3502.1          | C_unshiu_00339_mRNA_13.1    | -                               |
| GF0022730 | 1                            | 1                        | 0                            | Pentatricopeptide repeat-containing family protein (2)                                         | zinc ion binding [GO:0008270 molecular_function] (2); protein binding [GO:0005515 molecular_function] (2)                                                                                                                                                                                                                                                    |                                                                                                                                                                                                                                               | scaffold_5_mRNA_3439.1          | C_unshiu_00205_mRNA_16.1    | -                               |
| GF0022727 | 1                            | 1                        | 0                            | Gluathione S-transferase zeta class (2)                                                        | protein binding [GO:0005515 molecular_function] (2)                                                                                                                                                                                                                                                                                                          | Thioredoxin-like fold [IPRO12336] (2); Glutathione S-transferase, N-terminal [IPRO04045] (2); Glutathione S-transferase, C-terminal-like [IPRO10987] (2)                                                                                      | scaffold_5_mRNA_34.1            | C_unshiu_00230_mRNA_57.1    | -                               |
| GF0022726 | 1                            | 1                        | 0                            | Hypothetical protein (2)                                                                       | ADP binding [GO:0043531 molecular_function] (2)                                                                                                                                                                                                                                                                                                              | P-loop containing nucleoside triphosphate hydrolase [IPRO27417] (2); NB-ARC [IPRO02182] (2)                                                                                                                                                   | scaffold_5_mRNA_3382.1          | C_unshiu_02124_mRNA_1.1     | -                               |
| GF0022725 | 1                            | 1                        | 0                            | Hypothetical protein (2)                                                                       |                                                                                                                                                                                                                                                                                                                                                              |                                                                                                                                                                                                                                               | scaffold_5_mRNA_3373.1          | C_unshiu_02124_mRNA_2.1     | -                               |
| GF0022724 | 1                            | 1                        | 0                            | Disease resistance protein (1); Disease resistance protein RPS2 (1)                            |                                                                                                                                                                                                                                                                                                                                                              | Leucine-rich repeat domain, L domain-like [IPRO32675] (2); Winged helix-turn-helix DNA-binding domain [IPRO11991] (1)                                                                                                                         | scaffold_5_mRNA_3369.1          | C_unshiu_00660_mRNA_13.1    | -                               |
| GF0022723 | 1                            | 1                        | 0                            | Hypothetical protein (2)                                                                       |                                                                                                                                                                                                                                                                                                                                                              |                                                                                                                                                                                                                                               | scaffold_5_mRNA_3366.1          | C_unshiu_02743_mRNA_4.1     | -                               |
| GF0022722 | 1                            | 1                        | 0                            | Phosphoprotein phosphatase isoform 3 (1); Cc-obs-lr resistance protein, putative isoform 1 (1) |                                                                                                                                                                                                                                                                                                                                                              | Leucine-rich repeat domain, L domain-like [IPRO32675] (2)                                                                                                                                                                                     | scaffold_5_mRNA_3364.1          | C_unshiu_00304_mRNA_19.1    | -                               |

| ID        | Num. in <i>C. caryophyllae</i> | Num. in <i>C. acutis</i> | Num. in <i>P. trifoliata</i> | Note                                                                                                      | GO                                                                                                                                                                                                                                                                                                                                                                                                                                                                                                                                        | InterPro                                                                                                                                                                                                                                                                                                                                                                                                    | Members in <i>C. caryophyllae</i> | Members in <i>C. acutis</i> | Members in <i>P. trifoliata</i> |
|-----------|--------------------------------|--------------------------|------------------------------|-----------------------------------------------------------------------------------------------------------|-------------------------------------------------------------------------------------------------------------------------------------------------------------------------------------------------------------------------------------------------------------------------------------------------------------------------------------------------------------------------------------------------------------------------------------------------------------------------------------------------------------------------------------------|-------------------------------------------------------------------------------------------------------------------------------------------------------------------------------------------------------------------------------------------------------------------------------------------------------------------------------------------------------------------------------------------------------------|-----------------------------------|-----------------------------|---------------------------------|
| GF0022721 | 1                              | 1                        | 0                            | NBS-LRR type disease resistance protein (2)                                                               | ADP binding [GO:004533] molecular_function (2)                                                                                                                                                                                                                                                                                                                                                                                                                                                                                            | P-loop containing nucleoside triphosphate hydrolase [IPRO27417] (2); NB-ARC [IPRO02182] (2)                                                                                                                                                                                                                                                                                                                 | scaffold_5_mRNA_3352.1            | C_unshiu_00570_mRNA_20.1    | -                               |
| GF0022720 | 1                              | 1                        | 0                            | Hypothetical protein (2)                                                                                  | GTP binding [GO:000525] molecular_function (2); small GTPase mediated signal transduction [GO:007264] biological_process (2)                                                                                                                                                                                                                                                                                                                                                                                                              | P-loop containing nucleoside triphosphate hydrolase [IPRO27417] (2); Mitochondrial Rho-like [IPRO13684] (1); Small GTPase superfamily [IPRO01806] (1)                                                                                                                                                                                                                                                       | scaffold_5_mRNA_335.1             | C_unshiu_02357_mRNA_3.1     | -                               |
| GF0022719 | 1                              | 1                        | 1                            | Disease resistance protein (CC-NBS-LRR class) family protein (1); Hypothetical protein (1)                | protein binding [GO:0005515] molecular_function (2); binding [GO:0005488] molecular_function (2); ADP binding [GO:004533] molecular_function (1)                                                                                                                                                                                                                                                                                                                                                                                          | Armaldillo-like helical [IPRO11989] (2); Leucine-rich repeat domain, L domain-like [IPRO32675] (2); Atypical Arm repeat [IPRO2413] (2); Armaldillo [IPRO0225] (2); Armaldillo-type fold [IPRO1604] (2); Winged helix-stem-helix DNA-binding domain [IPRO11991] (1); P-loop containing nucleoside triphosphate hydrolase [IPRO27417] (1); NB-ARC [IPRO02182] (1)                                             | scaffold_5_mRNA_3334.1            | C_unshiu_00812_mRNA_2.1     | -                               |
| GF0022717 | 1                              | 1                        | 0                            | Hypothetical protein (2)                                                                                  | protein folding [GO:0006457] biological_process (2); unfolded protein binding [GO:0051082] molecular_function (2)                                                                                                                                                                                                                                                                                                                                                                                                                         | HSP40 DnaJ peptide-binding [IPRO08971] (2); Chaperone DnaJ, C-terminal [IPRO02939] (1)                                                                                                                                                                                                                                                                                                                      | scaffold_5_mRNA_3319.1            | C_unshiu_00570_mRNA_21.1    | -                               |
| GF0022714 | 1                              | 1                        | 0                            | Hypothetical protein (2)                                                                                  | ubiquitin-protein transferase activity [GO:0004842] molecular_function (2); protein ubiquitination [GO:0016567] biological_process (2); zinc ion binding [GO:0008270] molecular_function (2); protein binding [GO:0005515] molecular_function (2)                                                                                                                                                                                                                                                                                         | Zinc finger, RINGFYVE/PHD-type [IPRO13083] (2); E3 ubiquitin ligase RBR family [IPRO3127] (2); Zinc finger, RING-type [IPRO01841] (2)                                                                                                                                                                                                                                                                       | scaffold_5_mRNA_3264.1            | C_unshiu_00731_mRNA_13.1    | -                               |
| GF0022709 | 1                              | 1                        | 0                            | Hypothetical protein (2)                                                                                  | DNA-directed RNA polymerase activity [GO:0003899] molecular_function (1); DNA binding [GO:0003677] molecular_function (1); transcription, DNA-templated [GO:0006351] biological_process (1)                                                                                                                                                                                                                                                                                                                                               | RNA polymerase Rpb1, domain 1 [IPRO07080] (1)                                                                                                                                                                                                                                                                                                                                                               | scaffold_5_mRNA_3264.1            | C_unshiu_01156_mRNA_4.1     | -                               |
| GF0022707 | 1                              | 1                        | 0                            | Hypothetical protein (2)                                                                                  | DNA binding [GO:0003677] molecular_function (2); transcription, DNA-templated [GO:0006351] biological_process (2); DNA-directed RNA polymerase activity [GO:0003899] molecular_function (1); DNA-directed 5'-3' RNA polymerase activity [GO:0003899] molecular_function (1)                                                                                                                                                                                                                                                               | RNA polymerase Rpb1, domain 5 [IPRO07081] (2)                                                                                                                                                                                                                                                                                                                                                               | scaffold_5_mRNA_3263.1            | C_unshiu_01156_mRNA_3.1     | -                               |
| GF0022706 | 1                              | 1                        | 0                            | Small rubber particle protein (2)                                                                         |                                                                                                                                                                                                                                                                                                                                                                                                                                                                                                                                           | Rubber elongation factor [IPRO08802] (2)                                                                                                                                                                                                                                                                                                                                                                    | scaffold_5_mRNA_326.1             | C_unshiu_02040_mRNA_3.1     | -                               |
| GF0022704 | 1                              | 1                        | 0                            | Hypothetical protein (2)                                                                                  |                                                                                                                                                                                                                                                                                                                                                                                                                                                                                                                                           |                                                                                                                                                                                                                                                                                                                                                                                                             | scaffold_5_mRNA_3236.1            | C_unshiu_00451_mRNA_12.1    | -                               |
| GF0022703 | 1                              | 1                        | 0                            | Hypothetical protein (2)                                                                                  |                                                                                                                                                                                                                                                                                                                                                                                                                                                                                                                                           |                                                                                                                                                                                                                                                                                                                                                                                                             | scaffold_5_mRNA_3233.1            | C_unshiu_00852_mRNA_7.1     | -                               |
| GF0022699 | 1                              | 1                        | 0                            | Putative non-LTR reverse transcriptase (2)                                                                | nucleic acid binding [GO:0003676] molecular_function (2)                                                                                                                                                                                                                                                                                                                                                                                                                                                                                  | Reverse transcriptase zinc-binding domain [IPRO25960] (2); Ribonuclease H-like domain [IPRO12337] (2)                                                                                                                                                                                                                                                                                                       | scaffold_5_mRNA_3199.1            | C_unshiu_00361_mRNA_12.1    | -                               |
| GF0022693 | 1                              | 1                        | 0                            | Hypothetical protein (2)                                                                                  |                                                                                                                                                                                                                                                                                                                                                                                                                                                                                                                                           |                                                                                                                                                                                                                                                                                                                                                                                                             | scaffold_5_mRNA_314.1             | C_unshiu_01061_mRNA_15.1    | -                               |
| GF0022692 | 1                              | 1                        | 0                            | Hypothetical protein (2)                                                                                  | metal ion binding [GO:0046872] molecular_function (1)                                                                                                                                                                                                                                                                                                                                                                                                                                                                                     | Zinc finger, CCCH-type [IPRO00571] (1)                                                                                                                                                                                                                                                                                                                                                                      | scaffold_5_mRNA_3136.1            | C_unshiu_00888_mRNA_13.1    | -                               |
| GF0022691 | 1                              | 1                        | 0                            | Hypothetical protein (2)                                                                                  |                                                                                                                                                                                                                                                                                                                                                                                                                                                                                                                                           |                                                                                                                                                                                                                                                                                                                                                                                                             | scaffold_5_mRNA_3130.1            | C_unshiu_01691_mRNA_5.1     | -                               |
| GF0022690 | 1                              | 1                        | 0                            | Hypothetical protein (2)                                                                                  |                                                                                                                                                                                                                                                                                                                                                                                                                                                                                                                                           |                                                                                                                                                                                                                                                                                                                                                                                                             | scaffold_5_mRNA_3127.1            | C_unshiu_00755_mRNA_2.1     | -                               |
| GF0022689 | 1                              | 1                        | 0                            | Hypothetical protein (2)                                                                                  | protein binding [GO:0005515] molecular_function (2); iron ion binding [GO:0005506] molecular_function (2); heme binding [GO:0020037] molecular_function (2); oxidation-reduction process [GO:005114] biological_process (2); oxidoreductase activity, acting on paired donors, with incorporation or reduction of molecular oxygen [GO:0016705] molecular_function (2); monooxygenase activity [GO:0004497] molecular_function (1)                                                                                                        | SH3 domain [IPRO01452] (2)                                                                                                                                                                                                                                                                                                                                                                                  | scaffold_5_mRNA_3123.1            | C_unshiu_00961_mRNA_2.1     | -                               |
| GF0022687 | 1                              | 1                        | 0                            | Cytochrome P450 (1); Cytochrome P450 71D10, putative (1)                                                  |                                                                                                                                                                                                                                                                                                                                                                                                                                                                                                                                           | Cytochrome P450, conserved site [IPRO17972] (2); Cytochrome P450 [IPRO01128] (2); Cytochrome P450, E-class, group I [IPRO02401] (1); Cytochrome P450, E-class, group IV [IPRO02403] (1)                                                                                                                                                                                                                     | scaffold_5_mRNA_31.1              | C_unshiu_00230_mRNA_54.1    | -                               |
| GF0022686 | 1                              | 1                        | 0                            | Hypothetical protein (2)                                                                                  |                                                                                                                                                                                                                                                                                                                                                                                                                                                                                                                                           |                                                                                                                                                                                                                                                                                                                                                                                                             | scaffold_5_mRNA_3097.1            | C_unshiu_02001_mRNA_3.1     | -                               |
| GF0022685 | 1                              | 1                        | 0                            | Ras-like GTP-binding protein YPT1 (2)                                                                     | GTP binding [GO:000525] molecular_function (2); GTPase activity [GO:0003924] molecular_function (2); signal transduction [GO:0007165] biological_process (1); intracellular protein transport [GO:0006886] biological_process (1); intracellular [GO:0005622] cellular_component (1); nucleocytoplasmic transport [GO:0006913] biological_process (1); small GTPase mediated signal transduction [GO:0007264] biological_process (1); membrane [GO:0016020] cellular_component (1); protein transport [GO:0015031] biological_process (1) | Small GTP-binding protein domain [IPRO05225] (2); Small GTPase superfamily [IPRO01806] (2); P-loop containing nucleoside triphosphate hydrolase [IPRO27417] (2); Ras GTPase [IPRO02041] (1); Small GTPase superfamily, ARF type [IPRO24156] (1); Small GTPase superfamily, Rab type [IPRO03579] (1); Small GTPase superfamily, Rho type [IPRO03578] (1); Small GTPase superfamily, Ras type [IPRO20849] (1) | scaffold_5_mRNA_309.1             | C_unshiu_00127_mRNA_4.1     | -                               |
| GF0022684 | 1                              | 1                        | 0                            | Hypothetical protein (2)                                                                                  |                                                                                                                                                                                                                                                                                                                                                                                                                                                                                                                                           |                                                                                                                                                                                                                                                                                                                                                                                                             | scaffold_5_mRNA_3083.1            | C_unshiu_00219_mRNA_38.1    | -                               |
| GF0022683 | 1                              | 1                        | 0                            | Hypothetical protein (2)                                                                                  |                                                                                                                                                                                                                                                                                                                                                                                                                                                                                                                                           |                                                                                                                                                                                                                                                                                                                                                                                                             | scaffold_5_mRNA_3076.1            | C_unshiu_00734_mRNA_7.1     | -                               |
| GF0022682 | 1                              | 1                        | 0                            | Hypothetical protein (2)                                                                                  |                                                                                                                                                                                                                                                                                                                                                                                                                                                                                                                                           |                                                                                                                                                                                                                                                                                                                                                                                                             | scaffold_5_mRNA_3069.1            | C_unshiu_02141_mRNA_1.1     | -                               |
| GF0022681 | 1                              | 1                        | 0                            | Leucine Rich Repeat family protein, expressed (1); LRR receptor-like kinase family protein (1)            | protein binding [GO:0005515] molecular_function (2)                                                                                                                                                                                                                                                                                                                                                                                                                                                                                       | Leucine-rich repeat [IPRO01611] (2); Leucine-rich repeat domain, L domain-like [IPRO32675] (2); Leucine-rich repeat, typical sub-type [IPRO03591] (2)                                                                                                                                                                                                                                                       | scaffold_5_mRNA_3068.1            | C_unshiu_00961_mRNA_9.1     | -                               |
| GF0022680 | 1                              | 1                        | 0                            | Acyl-CoA binding protein 6 (2)                                                                            | fatty-acyl-CoA binding [GO:0000062] molecular_function (2)                                                                                                                                                                                                                                                                                                                                                                                                                                                                                | CoA-binding protein, ACBP [IPRO0552] (2); FERRUCY-CoA-binding protein, 3-helical bundle [IPRO14352] (2)                                                                                                                                                                                                                                                                                                     | scaffold_5_mRNA_3066.1            | C_unshiu_00061_mRNA_32.1    | -                               |
| GF0022678 | 1                              | 1                        | 0                            | Hypothetical protein (2)                                                                                  |                                                                                                                                                                                                                                                                                                                                                                                                                                                                                                                                           |                                                                                                                                                                                                                                                                                                                                                                                                             | scaffold_5_mRNA_3055.1            | C_unshiu_00061_mRNA_45.1    | -                               |
| GF0022677 | 1                              | 1                        | 0                            | Hypothetical protein (2)                                                                                  |                                                                                                                                                                                                                                                                                                                                                                                                                                                                                                                                           |                                                                                                                                                                                                                                                                                                                                                                                                             | scaffold_5_mRNA_3054.1            | C_unshiu_00061_mRNA_46.1    | -                               |
| GF0022676 | 1                              | 1                        | 0                            | Transcription factor MYB39 (2)                                                                            | DNA binding [GO:0003677] molecular_function (2)                                                                                                                                                                                                                                                                                                                                                                                                                                                                                           | Myb domain [IPRO17930] (2); SANT/Myb domain [IPRO01005] (2); Homeobox domain-like [IPRO09057] (1); Homeobox-like [IPRO09057] (1); EF-Hand 1, calcium-binding site [IPRO18247] (2); EF-hand domain [IPRO20288] (2); EF-hand domain pair [IPRO11992] (2)                                                                                                                                                      | scaffold_5_mRNA_3048.1            | C_unshiu_00671_mRNA_11.1    | -                               |
| GF0022672 | 1                              | 1                        | 0                            | Calmodulin (2)                                                                                            | calcium ion binding [GO:0005509] molecular_function (2)                                                                                                                                                                                                                                                                                                                                                                                                                                                                                   | SANT/Myb domain [IPRO01005] (2); Myb domain, plants [IPRO06447] (2); Homeobox domain-like [IPRO09057] (1); Homeobox domain-like [IPRO09057] (1)                                                                                                                                                                                                                                                             | scaffold_5_mRNA_3016.1            | C_unshiu_00078_mRNA_37.1    | -                               |
| GF0022671 | 1                              | 1                        | 0                            | Putative transcription factor KAN2 (2)                                                                    | DNA binding [GO:0003677] molecular_function (2)                                                                                                                                                                                                                                                                                                                                                                                                                                                                                           | SANT/Myb domain [IPRO01005] (2); Myb domain, plants [IPRO06447] (2); Homeobox domain-like [IPRO09057] (1); Homeobox domain-like [IPRO09057] (1)                                                                                                                                                                                                                                                             | scaffold_5_mRNA_3012.1            | C_unshiu_00078_mRNA_33.1    | -                               |
| GF0022670 | 1                              | 1                        | 0                            | Hypothetical protein (2)                                                                                  |                                                                                                                                                                                                                                                                                                                                                                                                                                                                                                                                           |                                                                                                                                                                                                                                                                                                                                                                                                             | scaffold_5_mRNA_3004.1            | C_unshiu_00078_mRNA_29.1    | -                               |
| GF0022668 | 1                              | 1                        | 0                            | Hypothetical protein (2)                                                                                  | nucleic acid binding [GO:0003676] molecular_function (2)                                                                                                                                                                                                                                                                                                                                                                                                                                                                                  | Ribonuclease H-like domain [IPRO12337] (2); T82/DP1/HVA22-related protein [IPRO08345] (1)                                                                                                                                                                                                                                                                                                                   | scaffold_5_mRNA_3.1               | C_unshiu_02167_mRNA_1.1     | -                               |
| GF0022662 | 1                              | 1                        | 0                            | Ankyrin repeat plant-like protein (2)                                                                     | protein binding [GO:0005515] molecular_function (2)                                                                                                                                                                                                                                                                                                                                                                                                                                                                                       | Ankyrin repeat [IPRO02110] (2); Ankyrin repeat-containing domain [IPRO20683] (2); PGD domain [IPRO26961] (2)                                                                                                                                                                                                                                                                                                | scaffold_5_mRNA_2931.1            | C_unshiu_00040_mRNA_14.1    | -                               |
| GF0022661 | 1                              | 1                        | 0                            | Putative retroelement pol polyprotein (1); Retrovirus-related Pol polyprotein from transposon TMT_104 (1) | DNA integration [GO:0015074] biological_process (2); nucleic acid binding [GO:0003676] molecular_function (2)                                                                                                                                                                                                                                                                                                                                                                                                                             | Ribonuclease H-like domain [IPRO12337] (2); Integrase, catalytic core [IPRO01584] (2); GAG-pre-integrase domain [IPRO25724] (2)                                                                                                                                                                                                                                                                             | scaffold_5_mRNA_2906.1            | C_unshiu_01150_mRNA_1.1     | -                               |
| GF0022659 | 1                              | 1                        | 0                            | Hypothetical protein (2)                                                                                  | oxidoreductase activity, acting on paired donors, with incorporation or reduction of molecular oxygen [GO:0016705] molecular_function (2); oxidation-reduction process [GO:005114] biological_process (2); iron ion binding [GO:0005506] molecular_function (2); heme binding [GO:0020037] molecular_function (2)                                                                                                                                                                                                                         | Cytochrome P450, conserved site [IPRO17972] (2); Cytochrome P450, E-class, group I [IPRO02401] (2); Cytochrome P450 [IPRO01128] (2)                                                                                                                                                                                                                                                                         | scaffold_5_mRNA_29.1              | C_unshiu_00230_mRNA_52.1    | -                               |
| GF0022657 | 1                              | 1                        | 0                            | Hypothetical protein (2)                                                                                  |                                                                                                                                                                                                                                                                                                                                                                                                                                                                                                                                           |                                                                                                                                                                                                                                                                                                                                                                                                             | scaffold_5_mRNA_2888.1            | C_unshiu_00389_mRNA_17.1    | -                               |
| GF0022656 | 1                              | 1                        | 0                            | Hypothetical protein (2)                                                                                  |                                                                                                                                                                                                                                                                                                                                                                                                                                                                                                                                           |                                                                                                                                                                                                                                                                                                                                                                                                             | scaffold_5_mRNA_2879.1            | C_unshiu_01065_mRNA_7.1     | -                               |
| GF0022652 | 1                              | 1                        | 0                            | Hypothetical protein (1); PAB-dependent poly(A)-specific ribonuclease subunit PAB3 (1)                    |                                                                                                                                                                                                                                                                                                                                                                                                                                                                                                                                           | Domain of unknown function DUF1336 [IPRO09769] (1); Protein ENHANCED DISEASE RESISTANCE 2, C-terminal [IPRO09769] (1)                                                                                                                                                                                                                                                                                       | scaffold_5_mRNA_2859.1            | C_unshiu_01037_mRNA_4.1     | -                               |
| GF0022651 | 1                              | 1                        | 0                            | Putative disease resistance gene NBS-LRR family protein (2)                                               | ADP binding [GO:004533] molecular_function (2)                                                                                                                                                                                                                                                                                                                                                                                                                                                                                            | Leucine-rich repeat domain, L domain-like [IPRO32675] (2); P-loop containing nucleoside triphosphate hydrolase [IPRO27417] (2); NB-ARC [IPRO02182] (2); Winged helix-stem-helix DNA-binding domain [IPRO11991] (1); AAA+ ATPase domain [IPRO03593] (1)                                                                                                                                                      | scaffold_5_mRNA_2840.1            | C_unshiu_01806_mRNA_3.1     | -                               |
| GF0022650 | 1                              | 1                        | 0                            | Hypothetical protein (2)                                                                                  |                                                                                                                                                                                                                                                                                                                                                                                                                                                                                                                                           | Protein ENHANCED DISEASE RESISTANCE 2, C-terminal [IPRO09769] (1); Domain of unknown function DUF1336 [IPRO09769] (1)                                                                                                                                                                                                                                                                                       | scaffold_5_mRNA_2833.1            | C_unshiu_01783_mRNA_3.1     | -                               |
| GF0022649 | 1                              | 1                        | 0                            | Hypothetical protein (2)                                                                                  |                                                                                                                                                                                                                                                                                                                                                                                                                                                                                                                                           |                                                                                                                                                                                                                                                                                                                                                                                                             | scaffold_5_mRNA_283.1             | C_unshiu_00159_mRNA_11.1    | -                               |













| ID        | Num. in <i>C. clementinae</i> | Num. in <i>C. acutis</i> | Num. in <i>P. trifoliate</i> | Note                                         | GO                                                                                                                                                                                                                                                                                                                                                                                                                                                                                                                                         | InterPro                                                                                                                                                                                                                                                                                                                                                                                                                                                                                                                                                                                                                                                                                                                   | Members in <i>C. clementinae</i> | Members in <i>C. acutis</i> | Members in <i>P. trifoliate</i> |
|-----------|-------------------------------|--------------------------|------------------------------|----------------------------------------------|--------------------------------------------------------------------------------------------------------------------------------------------------------------------------------------------------------------------------------------------------------------------------------------------------------------------------------------------------------------------------------------------------------------------------------------------------------------------------------------------------------------------------------------------|----------------------------------------------------------------------------------------------------------------------------------------------------------------------------------------------------------------------------------------------------------------------------------------------------------------------------------------------------------------------------------------------------------------------------------------------------------------------------------------------------------------------------------------------------------------------------------------------------------------------------------------------------------------------------------------------------------------------------|----------------------------------|-----------------------------|---------------------------------|
| GF0022294 | 1                             | 1                        | 0                            | Hypothetical protein (2)                     | COP1 vesicle coat [GO:0030127 cellular_component] (2); zinc ion binding [GO:0008270 molecular_function] (2); intracellular protein transport [GO:0006886 biological_process] (2); ER to Golgi vesicle-mediated transport [GO:0006888 biological_process] (2)                                                                                                                                                                                                                                                                               | Zinc finger, Sec23/Sec24-type [IPR006895] (2); von Willebrand factor, type A [IPR020351] (2); Sec23/Sec24, trunk domain [IPR006896] (2); ADP-H/Gelsolin-like domain [IPR029006] (2); Gelsolin-like domain [IPR007123] (2)                                                                                                                                                                                                                                                                                                                                                                                                                                                                                                  | scaffold_5_mRNA_1040.1           | C_unshii_00989_mRNA_2.1     | -                               |
| GF0022292 | 1                             | 1                        | 0                            | Hypothetical protein (2)                     |                                                                                                                                                                                                                                                                                                                                                                                                                                                                                                                                            | Gag-polypeptide of LTR copia-type [IPR029472] (1)                                                                                                                                                                                                                                                                                                                                                                                                                                                                                                                                                                                                                                                                          | scaffold_5_mRNA_1027.1           | C_unshii_00946_mRNA_8.1     | -                               |
| GF0022291 | 1                             | 1                        | 0                            | Hypothetical protein (2)                     |                                                                                                                                                                                                                                                                                                                                                                                                                                                                                                                                            | LEG family [IPR011100] (2)                                                                                                                                                                                                                                                                                                                                                                                                                                                                                                                                                                                                                                                                                                 | scaffold_5_mRNA_1025.1           | C_unshii_00946_mRNA_10.1    | -                               |
| GF0022290 | 1                             | 1                        | 0                            | Hypothetical protein (2)                     |                                                                                                                                                                                                                                                                                                                                                                                                                                                                                                                                            | Domain of unknown function DUF4283 [IPR025558] (2)                                                                                                                                                                                                                                                                                                                                                                                                                                                                                                                                                                                                                                                                         | scaffold_5_mRNA_1024.1           | C_unshii_00946_mRNA_11.1    | -                               |
| GF0022289 | 1                             | 1                        | 0                            | Ribonuclease H (2)                           | nucleic acid binding [GO:0003676 molecular_function] (2); RNA-DNA hybrid ribonuclease activity [GO:0004523 molecular_function] (2)                                                                                                                                                                                                                                                                                                                                                                                                         | Ribonuclease H domain [IPR002156] (2); Ribonuclease H-like domain [IPR012337] (2); TB2-DPI/HVA22-related protein [IPR004345] (1)                                                                                                                                                                                                                                                                                                                                                                                                                                                                                                                                                                                           | scaffold_5_mRNA_1020.1           | C_unshii_00946_mRNA_14.1    | -                               |
| GF0022288 | 1                             | 1                        | 0                            | Hypothetical protein (2)                     |                                                                                                                                                                                                                                                                                                                                                                                                                                                                                                                                            | S-adenosyl-L-methionine-dependent methyltransferase [IPR020631] (2)                                                                                                                                                                                                                                                                                                                                                                                                                                                                                                                                                                                                                                                        | scaffold_5_mRNA_102.1            | C_unshii_02888_mRNA_1.1     | -                               |
| GF0022286 | 1                             | 1                        | 0                            | Hypothetical protein (2)                     | zinc ion binding [GO:0008270 molecular_function] (2); nucleic acid binding [GO:0003676 molecular_function] (2)                                                                                                                                                                                                                                                                                                                                                                                                                             | Zinc finger, CCHC-type [IPR01878] (2); Domain of unknown function DUF4283 [IPR025558] (2)                                                                                                                                                                                                                                                                                                                                                                                                                                                                                                                                                                                                                                  | scaffold_5_mRNA_1009.1           | C_unshii_00083_mRNA_14.1    | -                               |
| GF0022285 | 1                             | 1                        | 0                            | Hypothetical protein (2)                     |                                                                                                                                                                                                                                                                                                                                                                                                                                                                                                                                            | Transposon, En/Spm-like [IPR004242] (2); Transposase-associated domain [IPR029480] (2)                                                                                                                                                                                                                                                                                                                                                                                                                                                                                                                                                                                                                                     | scaffold_5_mRNA_1002.1           | C_unshii_00083_mRNA_17.1    | -                               |
| GF0022284 | 1                             | 1                        | 0                            | Lysosomal Pro-Xaa carboxypeptidase (2)       | proteolysis [GO:0006508 biological_process] (2); serine-type peptidase activity [GO:0008236 molecular_function] (2)                                                                                                                                                                                                                                                                                                                                                                                                                        | Alpha/Beta hydrolase fold [IPR029058] (2); Peptidase S28 [IPR008758] (2)                                                                                                                                                                                                                                                                                                                                                                                                                                                                                                                                                                                                                                                   | scaffold_4_mRNA_999.1            | C_unshii_01189_mRNA_5.1     | -                               |
| GF0022283 | 1                             | 1                        | 0                            | Hypothetical protein (2)                     | serine-type peptidase activity [GO:0008236 molecular_function] (2); proteolysis [GO:0006508 biological_process] (2)                                                                                                                                                                                                                                                                                                                                                                                                                        | Peptidase S28 [IPR008758] (2)                                                                                                                                                                                                                                                                                                                                                                                                                                                                                                                                                                                                                                                                                              | scaffold_4_mRNA_997.1            | C_unshii_01189_mRNA_3.1     | -                               |
| GF0022282 | 1                             | 1                        | 0                            | LRR receptor-like kinase family protein (2)  | ATP binding [GO:0005524 molecular_function] (2); protein phosphorylation [GO:0006468 biological_process] (2); protein kinase activity [GO:0004672 molecular_function] (2); protein binding [GO:0005515 molecular_function] (2)                                                                                                                                                                                                                                                                                                             | Protein kinase domain [IPR000719] (2); Leucine-rich repeat domain, L domain-like [IPR032675] (2); Protein kinase-like domain [IPR011009] (2); Leucine-rich repeat, typical subtype [IPR003591] (2); Protein kinase, ATP binding site [IPR017441] (2); Tyrosine-protein kinase, active site [IPR008266] (2); Leucine-rich repeat [IPR01611] (2); Concavalin A-like lectin/glucanase domain [IPR013320] (1)                                                                                                                                                                                                                                                                                                                  | scaffold_4_mRNA_995.1            | C_unshii_01189_mRNA_1.1     | -                               |
| GF0022281 | 1                             | 1                        | 0                            | Hypothetical protein (2)                     |                                                                                                                                                                                                                                                                                                                                                                                                                                                                                                                                            |                                                                                                                                                                                                                                                                                                                                                                                                                                                                                                                                                                                                                                                                                                                            | scaffold_4_mRNA_984.1            | C_unshii_00715_mRNA_2.1     | -                               |
| GF0022280 | 1                             | 1                        | 0                            | Hypothetical protein (2)                     | nucleic acid binding [GO:0003676 molecular_function] (1)                                                                                                                                                                                                                                                                                                                                                                                                                                                                                   | Zinc finger C2H2-type [IPR013087] (1)                                                                                                                                                                                                                                                                                                                                                                                                                                                                                                                                                                                                                                                                                      | scaffold_4_mRNA_983.1            | C_unshii_00715_mRNA_3.1     | -                               |
| GF0022279 | 1                             | 1                        | 0                            | LRR receptor-like kinase family protein (2)  | ATP binding [GO:0005524 molecular_function] (2); protein phosphorylation [GO:0006468 biological_process] (2); protein kinase activity [GO:0004672 molecular_function] (2); protein binding [GO:0005515 molecular_function] (1)                                                                                                                                                                                                                                                                                                             | Protein kinase, ATP binding site [IPR017441] (2); Protein kinase domain [IPR000719] (2); Leucine-rich repeat domain, L domain-like [IPR032675] (2); Protein kinase-like domain [IPR011009] (2); Leucine-rich repeat [IPR01611] (1); Leucine-rich repeat, typical subtype [IPR003591] (1); Concavalin A-like lectin/glucanase domain [IPR013320] (1)                                                                                                                                                                                                                                                                                                                                                                        | scaffold_4_mRNA_981.1            | C_unshii_00715_mRNA_4.1     | -                               |
| GF0022278 | 1                             | 1                        | 0                            | Hypothetical protein (2)                     |                                                                                                                                                                                                                                                                                                                                                                                                                                                                                                                                            | Leucine-rich repeat domain, L domain-like [IPR032675] (2); Leucine-rich repeat [IPR01611] (2)                                                                                                                                                                                                                                                                                                                                                                                                                                                                                                                                                                                                                              | scaffold_4_mRNA_980.1            | C_unshii_00715_mRNA_5.1     | -                               |
| GF0022277 | 1                             | 1                        | 0                            | Hypothetical leucine rich repeat protein (2) | protein binding [GO:0005515 molecular_function] (2)                                                                                                                                                                                                                                                                                                                                                                                                                                                                                        | Leucine-rich repeat domain, L domain-like [IPR032675] (2); Leucine-rich repeat [IPR01611] (2)                                                                                                                                                                                                                                                                                                                                                                                                                                                                                                                                                                                                                              | scaffold_4_mRNA_977.1            | C_unshii_00715_mRNA_8.1     | -                               |
| GF0022276 | 1                             | 1                        | 0                            | Hypothetical protein (2)                     |                                                                                                                                                                                                                                                                                                                                                                                                                                                                                                                                            |                                                                                                                                                                                                                                                                                                                                                                                                                                                                                                                                                                                                                                                                                                                            | scaffold_4_mRNA_974.1            | C_unshii_00715_mRNA_11.1    | -                               |
| GF0022275 | 1                             | 1                        | 0                            | Hypothetical protein (2)                     |                                                                                                                                                                                                                                                                                                                                                                                                                                                                                                                                            |                                                                                                                                                                                                                                                                                                                                                                                                                                                                                                                                                                                                                                                                                                                            | scaffold_4_mRNA_973.1            | C_unshii_00715_mRNA_12.1    | -                               |
| GF0022274 | 1                             | 1                        | 0                            | Hypothetical protein (2)                     |                                                                                                                                                                                                                                                                                                                                                                                                                                                                                                                                            |                                                                                                                                                                                                                                                                                                                                                                                                                                                                                                                                                                                                                                                                                                                            | scaffold_4_mRNA_971.1            | C_unshii_00715_mRNA_14.1    | -                               |
| GF0022271 | 1                             | 1                        | 0                            | Hypothetical protein (2)                     |                                                                                                                                                                                                                                                                                                                                                                                                                                                                                                                                            |                                                                                                                                                                                                                                                                                                                                                                                                                                                                                                                                                                                                                                                                                                                            | scaffold_4_mRNA_950.1            | C_unshii_00013_mRNA_72.1    | -                               |
| GF0022270 | 1                             | 1                        | 0                            | Hypothetical protein (2)                     |                                                                                                                                                                                                                                                                                                                                                                                                                                                                                                                                            |                                                                                                                                                                                                                                                                                                                                                                                                                                                                                                                                                                                                                                                                                                                            | scaffold_4_mRNA_943.1            | C_unshii_00013_mRNA_61.1    | -                               |
| GF0022269 | 1                             | 1                        | 0                            | Hypothetical protein (2)                     |                                                                                                                                                                                                                                                                                                                                                                                                                                                                                                                                            | Domain of unknown function DUF1985 [IPR015410] (2)                                                                                                                                                                                                                                                                                                                                                                                                                                                                                                                                                                                                                                                                         | scaffold_4_mRNA_942.1            | C_unshii_00013_mRNA_60.1    | -                               |
| GF0022268 | 1                             | 1                        | 0                            | Hypothetical protein (2)                     | GTPase activity [GO:0003924 molecular_function] (2); GTP binding [GO:0005525 molecular_function] (2); protein transport [GO:0015031 biological_process] (1); intracellular protein transport [GO:0006886 biological_process] (1); intracellular [GO:0005622 cellular_component] (1); signal transduction [GO:0007165 biological_process] (1); membrane [GO:0016020 cellular_component] (1); nucleocytoplasmic transport [GO:0006913 biological_process] (1); small GTPase mediated signal transduction [GO:0007264 biological_process] (1) | Sigma-54 interaction domain, ATP-binding site 1 [IPR025621] (2); P-loop containing nucleoside triphosphate hydrolase [IPR027417] (2); Small GTPase superfamily [IPR013086] (2); Small GTP-binding protein domain [IPR005225] (2); Small GTPase superfamily, Rab type [IPR003579] (1); Small GTPase superfamily, ARF type [IPR024341] (1); Ras GTPase [IPR020411] (1); Small GTPase superfamily, Rho type [IPR003578] (1); Small GTPase superfamily, Ras type [IPR020491] (1)                                                                                                                                                                                                                                               | scaffold_4_mRNA_941.1            | C_unshii_00013_mRNA_59.1    | -                               |
| GF0022267 | 1                             | 1                        | 0                            | Hypothetical protein (2)                     |                                                                                                                                                                                                                                                                                                                                                                                                                                                                                                                                            |                                                                                                                                                                                                                                                                                                                                                                                                                                                                                                                                                                                                                                                                                                                            | scaffold_4_mRNA_940.1            | C_unshii_00013_mRNA_58.1    | -                               |
| GF0022266 | 1                             | 1                        | 0                            | Hypothetical protein (2)                     |                                                                                                                                                                                                                                                                                                                                                                                                                                                                                                                                            |                                                                                                                                                                                                                                                                                                                                                                                                                                                                                                                                                                                                                                                                                                                            | scaffold_4_mRNA_938.1            | C_unshii_00013_mRNA_56.1    | -                               |
| GF0022265 | 1                             | 1                        | 0                            | Hypothetical protein (2)                     |                                                                                                                                                                                                                                                                                                                                                                                                                                                                                                                                            | Domain of unknown function DUF4283 [IPR025558] (2)                                                                                                                                                                                                                                                                                                                                                                                                                                                                                                                                                                                                                                                                         | scaffold_4_mRNA_926.1            | C_unshii_00013_mRNA_44.1    | -                               |
| GF0022264 | 1                             | 1                        | 0                            | Putative transporter MCH1 (2)                |                                                                                                                                                                                                                                                                                                                                                                                                                                                                                                                                            | Nodulin-like [IPR010658] (2); Major facilitator superfamily domain [IPR020846] (2)                                                                                                                                                                                                                                                                                                                                                                                                                                                                                                                                                                                                                                         | scaffold_4_mRNA_921.1            | C_unshii_00013_mRNA_41.1    | -                               |
| GF0022263 | 1                             | 1                        | 0                            | Putative calcium-binding protein CML15 (2)   | calcium ion binding [GO:0005509 molecular_function] (2)                                                                                                                                                                                                                                                                                                                                                                                                                                                                                    | EF-hand domain [IPR02048] (2); EF-Hand 1, calcium-binding site [IPR018247] (2); EF-hand domain pair [IPR011992] (2)                                                                                                                                                                                                                                                                                                                                                                                                                                                                                                                                                                                                        | scaffold_4_mRNA_92.1             | C_unshii_00202_mRNA_13.1    | -                               |
| GF0022262 | 1                             | 1                        | 0                            | Hypothetical protein (2)                     |                                                                                                                                                                                                                                                                                                                                                                                                                                                                                                                                            | Domain of unknown function DUF4283 [IPR025558] (1)                                                                                                                                                                                                                                                                                                                                                                                                                                                                                                                                                                                                                                                                         | scaffold_4_mRNA_909.1            | C_unshii_00013_mRNA_29.1    | -                               |
| GF0022261 | 1                             | 1                        | 0                            | Hypothetical protein (2)                     |                                                                                                                                                                                                                                                                                                                                                                                                                                                                                                                                            |                                                                                                                                                                                                                                                                                                                                                                                                                                                                                                                                                                                                                                                                                                                            | scaffold_4_mRNA_900.1            | C_unshii_00013_mRNA_18.1    | -                               |
| GF0022260 | 1                             | 1                        | 0                            | Hypothetical protein (2)                     | proteolysis [GO:0006508 biological_process] (2); cysteine-type peptidase activity [GO:0008234 molecular_function] (2)                                                                                                                                                                                                                                                                                                                                                                                                                      | Upl1 protease family, C-terminal catalytic domain [IPR003653] (2)                                                                                                                                                                                                                                                                                                                                                                                                                                                                                                                                                                                                                                                          | scaffold_4_mRNA_898.1            | C_unshii_00013_mRNA_16.1    | -                               |
| GF0022258 | 1                             | 1                        | 0                            | Hypothetical protein (2)                     |                                                                                                                                                                                                                                                                                                                                                                                                                                                                                                                                            | Leucine-rich repeat domain, L domain-like [IPR032675] (2)                                                                                                                                                                                                                                                                                                                                                                                                                                                                                                                                                                                                                                                                  | scaffold_4_mRNA_892.1            | C_unshii_00013_mRNA_12.1    | -                               |
| GF0022257 | 1                             | 1                        | 0                            | Hypothetical protein (2)                     |                                                                                                                                                                                                                                                                                                                                                                                                                                                                                                                                            |                                                                                                                                                                                                                                                                                                                                                                                                                                                                                                                                                                                                                                                                                                                            | scaffold_4_mRNA_887.1            | C_unshii_00013_mRNA_6.1     | -                               |
| GF0022256 | 1                             | 1                        | 0                            | Hypothetical protein (2)                     |                                                                                                                                                                                                                                                                                                                                                                                                                                                                                                                                            |                                                                                                                                                                                                                                                                                                                                                                                                                                                                                                                                                                                                                                                                                                                            | scaffold_4_mRNA_879.1            | C_unshii_00280_mRNA_31.1    | -                               |
| GF0022254 | 1                             | 1                        | 0                            | Hypothetical protein (2)                     |                                                                                                                                                                                                                                                                                                                                                                                                                                                                                                                                            |                                                                                                                                                                                                                                                                                                                                                                                                                                                                                                                                                                                                                                                                                                                            | scaffold_4_mRNA_873.1            | C_unshii_00280_mRNA_25.1    | -                               |
| GF0022253 | 1                             | 1                        | 0                            | LRR receptor-like kinase family protein (2)  | protein binding [GO:0005515 molecular_function] (2); protein kinase activity [GO:0004672 molecular_function] (2); protein phosphorylation [GO:0006468 biological_process] (2); ATP binding [GO:0005524 molecular_function] (2)                                                                                                                                                                                                                                                                                                             | Leucine-rich repeat domain, L domain-like [IPR032675] (2); Protein kinase-like domain [IPR011009] (2); Leucine-rich repeat, typical subtype [IPR003591] (2); Protein kinase domain [IPR000719] (2); Leucine-rich repeat [IPR01611] (2); Leucine-rich repeat-containing N-terminal, plant-type [IPR013210] (2); Protein kinase, ATP binding site [IPR017441] (2); Tyrosine-protein kinase, active site [IPR008266] (2); Concavalin A-like lectin/glucanase domain [IPR013320] (1); Serine/threonine/tyrosine-protein kinase catalytic domain [IPR001245] (1); Serine/threonine/dual specificity protein kinase, catalytic domain [IPR02290] (1); Serine/threonine/tyrosine-protein kinase, catalytic domain [IPR001245] (1) | scaffold_4_mRNA_871.1            | C_unshii_00280_mRNA_22.1    | -                               |
| GF0022252 | 1                             | 1                        | 0                            | Hypothetical protein (2)                     |                                                                                                                                                                                                                                                                                                                                                                                                                                                                                                                                            | Leucine-rich repeat, typical subtype [IPR003591] (2); Leucine-rich repeat domain, L domain-like [IPR032675] (2); Protein kinase-like domain [IPR011009] (2); Protein kinase domain [IPR000719] (2); Leucine-rich repeat [IPR01611] (2); Protein kinase, ATP binding site [IPR017441] (2); Leucine-rich repeat-containing N-terminal, plant-type [IPR013210] (2); Concavalin A-like lectin/glucanase domain [IPR013320] (1); Serine/threonine/dual specificity protein kinase, catalytic domain [IPR02290] (1)                                                                                                                                                                                                              | scaffold_4_mRNA_866.1            | C_unshii_03100_mRNA_1.1     | -                               |
| GF0022249 | 1                             | 1                        | 0                            | Hypothetical protein (2)                     | cysteine-type peptidase activity [GO:0008234 molecular_function] (2); proteolysis [GO:0006508 biological_process] (2)                                                                                                                                                                                                                                                                                                                                                                                                                      | Upl1 protease family, C-terminal catalytic domain [IPR003653] (2); Domain of unknown function DUF1985 [IPR015410] (2)                                                                                                                                                                                                                                                                                                                                                                                                                                                                                                                                                                                                      | scaffold_4_mRNA_863.1            | C_unshii_00258_mRNA_38.1    | -                               |
| GF0022248 | 1                             | 1                        | 0                            | Hypothetical protein (2)                     |                                                                                                                                                                                                                                                                                                                                                                                                                                                                                                                                            | MULE transposase domain [IPR018289] (2); Transposase, MuDR, plant [IPR004332] (2)                                                                                                                                                                                                                                                                                                                                                                                                                                                                                                                                                                                                                                          | scaffold_4_mRNA_862.1            | C_unshii_00258_mRNA_37.1    | -                               |
| GF0022247 | 1                             | 1                        | 0                            | Hypothetical protein (2)                     | DNA binding [GO:0003677 molecular_function] (2); protein dimerization activity [GO:0046983 molecular_function] (2); nucleic acid binding [GO:0003676 molecular_function] (1)                                                                                                                                                                                                                                                                                                                                                               | Zinc finger, BED-type [IPR003656] (2); HAT, C-terminal dimerisation domain [IPR00986] (2); Zinc finger C2H2-type [IPR013087] (1)                                                                                                                                                                                                                                                                                                                                                                                                                                                                                                                                                                                           | scaffold_4_mRNA_861.1            | C_unshii_00258_mRNA_35.1    | -                               |
| GF0022246 | 1                             | 1                        | 0                            | Hypothetical protein (2)                     |                                                                                                                                                                                                                                                                                                                                                                                                                                                                                                                                            |                                                                                                                                                                                                                                                                                                                                                                                                                                                                                                                                                                                                                                                                                                                            | scaffold_4_mRNA_860.1            | C_unshii_00258_mRNA_34.1    | -                               |



| ID        | Num. in <i>C. clementinae</i> | Num. in <i>C. acutis</i> | Num. in <i>P. trifoliata</i> | Note                                                                                                                     | GO                                                                                                                                                                                                                                                                                                                                                                                                                                                                                                                                         | InterPro                                                                                                                                                                                                                                                                                                                                                                                                                                                    | Members in <i>C. clementinae</i> | Members in <i>C. acutis</i> | Members in <i>P. trifoliata</i> |
|-----------|-------------------------------|--------------------------|------------------------------|--------------------------------------------------------------------------------------------------------------------------|--------------------------------------------------------------------------------------------------------------------------------------------------------------------------------------------------------------------------------------------------------------------------------------------------------------------------------------------------------------------------------------------------------------------------------------------------------------------------------------------------------------------------------------------|-------------------------------------------------------------------------------------------------------------------------------------------------------------------------------------------------------------------------------------------------------------------------------------------------------------------------------------------------------------------------------------------------------------------------------------------------------------|----------------------------------|-----------------------------|---------------------------------|
| GF0022174 | 1                             | 1                        | 0                            | Cysteine/histidine-rich C1 domain protein (2)                                                                            | intracellular signal transduction [GO:003556 biological_process] (2); oxidation-reduction process [GO:005114 biological_process] (1); protein-disulfide reductase activity [GO:0047134 molecular_function] (1)                                                                                                                                                                                                                                                                                                                             | Protein kinase C-like, phorbol ester/diacylglycerol-binding domain [IPR00219] (2); DC1 [IPR004146] (1); Cl-like [IPR01424] (1)                                                                                                                                                                                                                                                                                                                              | scaffold_4_mRNA_374.1            | C_unshiu_00459_mRNA_10.1    | -                               |
| GF0022172 | 1                             | 1                        | 0                            | Hypothetical protein (2)                                                                                                 |                                                                                                                                                                                                                                                                                                                                                                                                                                                                                                                                            |                                                                                                                                                                                                                                                                                                                                                                                                                                                             | scaffold_4_mRNA_368.1            | C_unshiu_00459_mRNA_4.1     | -                               |
| GF0022171 | 1                             | 1                        | 0                            | Hypothetical protein (2)                                                                                                 |                                                                                                                                                                                                                                                                                                                                                                                                                                                                                                                                            | X8 domain [IPR012946] (2)                                                                                                                                                                                                                                                                                                                                                                                                                                   | scaffold_4_mRNA_367.1            | C_unshiu_00459_mRNA_3.1     | -                               |
| GF0022170 | 1                             | 1                        | 0                            | Hypothetical protein (2)                                                                                                 |                                                                                                                                                                                                                                                                                                                                                                                                                                                                                                                                            |                                                                                                                                                                                                                                                                                                                                                                                                                                                             | scaffold_4_mRNA_359.1            | C_unshiu_00979_mRNA_23.1    | -                               |
| GF0022169 | 1                             | 1                        | 0                            | Thioredoxin HP (2)                                                                                                       | cell redox homeostasis [GO:004544 biological_process] (2); glycerol ether metabolic process [GO:0006662 biological_process] (2); protein disulfide oxidoreductase activity [GO:0015035 molecular_function] (2)                                                                                                                                                                                                                                                                                                                             | Thioredoxin-like fold [IPR012335] (2); Thioredoxin domain [IPR013766] (2); Thioredoxin [IPR005746] (2)                                                                                                                                                                                                                                                                                                                                                      | scaffold_4_mRNA_346.1            | C_unshiu_00979_mRNA_10.1    | -                               |
| GF0022168 | 1                             | 1                        | 0                            | Hypothetical protein (2)                                                                                                 |                                                                                                                                                                                                                                                                                                                                                                                                                                                                                                                                            |                                                                                                                                                                                                                                                                                                                                                                                                                                                             | scaffold_4_mRNA_341.1            | C_unshiu_00979_mRNA_5.1     | -                               |
| GF0022163 | 1                             | 1                        | 0                            | Hypothetical protein (2)                                                                                                 |                                                                                                                                                                                                                                                                                                                                                                                                                                                                                                                                            |                                                                                                                                                                                                                                                                                                                                                                                                                                                             | scaffold_4_mRNA_3263.1           | C_unshiu_00001_mRNA_358.1   | -                               |
| GF0022161 | 1                             | 1                        | 0                            | Hypothetical protein (2)                                                                                                 |                                                                                                                                                                                                                                                                                                                                                                                                                                                                                                                                            |                                                                                                                                                                                                                                                                                                                                                                                                                                                             | scaffold_4_mRNA_325.1            | C_unshiu_00299_mRNA_34.1    | -                               |
| GF0022160 | 1                             | 1                        | 0                            | G-type lectin S-receptor-like serine/threonine-protein kinase RLK1 (2)                                                   | ATP binding [GO:0005524 molecular_function] (2); protein phosphorylation [GO:0006468 biological_process] (2); protein kinase activity [GO:0004672 molecular_function] (2); protein serine/threonine kinase activity [GO:0004674 molecular_function] (2)                                                                                                                                                                                                                                                                                    | Bull-type lectin domain [IPR001480] (2); Serine/threonine-protein kinase, active site [IPR008271] (2); Protein kinase, ATP binding site [IPR017441] (2); Protein kinase-like domain [IPR011009] (2); S-receptor-like serine/threonine-protein kinase [IPR02471] (2); Protein kinase domain [IPR000719] (2); Serine/threonine/dual specificity protein kinase, catalytic domain [IPR002390] (1); Concanavalin A-like lectin glucanase domain [IPR013320] (1) | scaffold_4_mRNA_3240.1           | C_unshiu_00001_mRNA_377.1   | -                               |
| GF0022159 | 1                             | 1                        | 0                            | DEAD-box ATP-dependent RNA helicase (2)                                                                                  | nucleic acid binding [GO:0003676 molecular_function] (2); ATP binding [GO:0005524 molecular_function] (2)                                                                                                                                                                                                                                                                                                                                                                                                                                  | Helicase superfamily 1/2, ATP-binding domain [IPR014001] (2); RNA helicase, DEAD-box type, 0 motif [IPR014014] (2); P-loop containing nucleoside triphosphate hydrolase [IPR027417] (2); ATP-dependent RNA helicase DEAD-box, conserved site [IPR00929] (2); DEAD/DEAH box helicase domain [IPR011545] (2)                                                                                                                                                  | scaffold_4_mRNA_324.1            | C_unshiu_00299_mRNA_33.1    | -                               |
| GF0022158 | 1                             | 1                        | 0                            | Hypothetical protein (1); Putative 0 micromolar linker histone polypeptide-like (1)                                      | protein binding [GO:0005515 molecular_function] (2); protein-N-terminal asparagine amidohydrolase activity [GO:0008418 molecular_function] (1); DNA binding [GO:0005677 molecular_function] (1)                                                                                                                                                                                                                                                                                                                                            | Bromodomain, conserved site [IPR018359] (2); Bromodomain [IPR001487] (2); Protein-N-terminal asparagine amidohydrolase [IPR026750] (1); Homeobox domain-like [IPR009057] (1); SANT/Myb domain [IPR01005] (1)                                                                                                                                                                                                                                                | scaffold_4_mRNA_3236.1           | C_unshiu_00001_mRNA_381.1   | -                               |
| GF0022157 | 1                             | 1                        | 0                            | Homeobox-leucine zipper protein HAT14 (2)                                                                                | DNA binding [GO:0003677 molecular_function] (2); sequence-specific DNA binding [GO:0043565 molecular_function] (2); regulation of transcription, DNA-templated [GO:0006355 biological_process] (2); transcription factor activity, sequence-specific DNA binding [GO:0003700 molecular_function] (2)                                                                                                                                                                                                                                       | Homeobox domain [IPR001356] (2); Leucine zipper, homeobox-associated [IPR003106] (2); Homeobox-like [IPR009057] (1); Homeobox domain-like [IPR009057] (1)                                                                                                                                                                                                                                                                                                   | scaffold_4_mRNA_3233.1           | C_unshiu_00001_mRNA_383.1   | -                               |
| GF0022156 | 1                             | 1                        | 0                            | Hypothetical protein (2)                                                                                                 |                                                                                                                                                                                                                                                                                                                                                                                                                                                                                                                                            |                                                                                                                                                                                                                                                                                                                                                                                                                                                             | scaffold_4_mRNA_3231.1           | C_unshiu_00001_mRNA_385.1   | -                               |
| GF0022155 | 1                             | 1                        | 0                            | Non-LTR retroelement reverse transcriptase (1); Hypothetical protein (1)                                                 | nucleic acid binding [GO:0003676 molecular_function] (2)                                                                                                                                                                                                                                                                                                                                                                                                                                                                                   | Ribonuclease H-like domain [IPR012337] (2); Reverse transcriptase zinc-binding domain [IPR026960] (2); Endonuclease/exonuclease/phosphatase [IPR005155] (2); Vacuolar protein sorting-associated protein 62 [IPR009291] (1)                                                                                                                                                                                                                                 | scaffold_4_mRNA_3218.1           | C_unshiu_00001_mRNA_400.1   | -                               |
| GF0022154 | 1                             | 1                        | 0                            | Hypothetical protein (2)                                                                                                 |                                                                                                                                                                                                                                                                                                                                                                                                                                                                                                                                            |                                                                                                                                                                                                                                                                                                                                                                                                                                                             | scaffold_4_mRNA_321.1            | C_unshiu_00299_mRNA_30.1    | -                               |
| GF0022152 | 1                             | 1                        | 0                            | Two-component response regulator ARR3-like protein (2)                                                                   | phosphorelay signal transduction system [GO:0000160 biological_process] (2)                                                                                                                                                                                                                                                                                                                                                                                                                                                                | CheY-like superfamily [IPR011006] (2); Signal transduction response regulator, receiver domain [IPR001789] (2)                                                                                                                                                                                                                                                                                                                                              | scaffold_4_mRNA_320.1            | C_unshiu_00299_mRNA_29.1    | -                               |
| GF0022151 | 1                             | 1                        | 0                            | Ras-related protein Rab11A (2)                                                                                           | GTP binding [GO:0005525 molecular_function] (2); GTPase activity [GO:0003924 molecular_function] (2); small GTPase mediated signal transduction [GO:0007264 biological_process] (1); nucleocytoplasmic transport [GO:0006913 biological_process] (1); membrane [GO:0016020 cellular_component] (1); signal transduction [GO:0007165 biological_process] (1); intracellular protein transport [GO:0006886 biological_process] (1); intracellular [GO:0005622 cellular_component] (1); protein transport [GO:0015031 biological_process] (1) | P-loop containing nucleoside triphosphate hydrolase [IPR027417] (2); Small GTPase superfamily [IPR001806] (2); Small GTP-binding protein domain [IPR005225] (2); Small GTPase superfamily, Ras type [IPR020849] (1); Small GTPase superfamily, Rho type [IPR003578] (1); Small GTPase superfamily, ARF type [IPR024156] (1); Small GTPase superfamily, Rab type [IPR003579] (1); Ran GTPase [IPR002041] (1)                                                 | scaffold_4_mRNA_3195.1           | C_unshiu_00001_mRNA_317.1   | -                               |
| GF0022150 | 1                             | 1                        | 0                            | Hypothetical protein (2)                                                                                                 |                                                                                                                                                                                                                                                                                                                                                                                                                                                                                                                                            |                                                                                                                                                                                                                                                                                                                                                                                                                                                             | scaffold_4_mRNA_3193.1           | C_unshiu_00001_mRNA_315.1   | -                               |
| GF0022149 | 1                             | 1                        | 0                            | Tecophilin O-methyltransferase (1); Steroid methyltransferase-like 3 (1)                                                 | methyltransferase activity [GO:0008168 molecular_function] (1); metabolic process [GO:0008152 biological_process] (1); steroid biosynthetic process [GO:0006694 biological_process] (1)                                                                                                                                                                                                                                                                                                                                                    | SAM-dependent methyltransferase SAMT type [IPR003084] (1); Methyltransferase type 11 [IPR013216] (1); S-adenosyl-L-methionine dependent methyltransferase [IPR029063] (1); Steroid methyltransferase C-terminal [IPR013705] (1)                                                                                                                                                                                                                             | scaffold_4_mRNA_3192.2           | C_unshiu_00001_mRNA_314.2   | -                               |
| GF0022147 | 1                             | 1                        | 0                            | Auxin response factor (2)                                                                                                | regulation of transcription, DNA-templated [GO:0006355 biological_process] (2); response to hormone [GO:0009725 biological_process] (2); nucleus [GO:0005634 cellular_component] (2); DNA binding [GO:0003677 molecular_function] (2)                                                                                                                                                                                                                                                                                                      | B3 DNA binding domain [IPR003340] (2); Leucine-rich repeat domain, L domain-like [IPR02675] (2); DNA-binding prokaryote domain [IPR015300] (2); Auxin response factor [IPR010525] (2); Receptor L-domain [IPR00494] (1)                                                                                                                                                                                                                                     | scaffold_4_mRNA_3177.1           | C_unshiu_00001_mRNA_299.1   | -                               |
| GF0022146 | 1                             | 1                        | 0                            | Disease resistance protein (1); NB-ARC domain disease resistance protein (1)                                             | ADP binding [GO:0043531 molecular_function] (1)                                                                                                                                                                                                                                                                                                                                                                                                                                                                                            | Leucine-rich repeat domain, L domain-like [IPR02675] (2); P-loop containing nucleoside triphosphate hydrolase [IPR027417] (1); NB-ARC [IPR002182] (1)                                                                                                                                                                                                                                                                                                       | scaffold_4_mRNA_3176.1           | C_unshiu_00001_mRNA_298.1   | -                               |
| GF0022143 | 1                             | 1                        | 0                            | Purple acid phosphatase (2)                                                                                              | acid phosphatase activity [GO:0003993 molecular_function] (2); metal ion binding [GO:0046872 molecular_function] (2); hydrolase activity [GO:0016787 molecular_function] (2)                                                                                                                                                                                                                                                                                                                                                               | Purple acid phosphatase-like, N-terminal [IPR009653] (2); Metallo-dependent phosphatase-like [IPR029052] (2); Iron zinc purple acid phosphatase-like C-terminal domain [IPR025733] (2); Purple acid phosphatase, N-terminal [IPR015914] (2); Calcineurin-like phosphoesterase domain, apaf type [IPR004843] (1); Neocarzinostatin-like [IPR027273] (1); Calcineurin-like phosphoesterase domain, Apaf type [IPR004843] (1)                                  | scaffold_4_mRNA_3144.1           | C_unshiu_00001_mRNA_271.1   | -                               |
| GF0022142 | 1                             | 1                        | 0                            | Cytochrome P450 (2)                                                                                                      | iron ion binding [GO:0005506 molecular_function] (2); heme binding [GO:0020037 molecular_function] (2); oxidation-reduction process [GO:005114 biological_process] (2); oxidoreductase activity, acting on paired donors, with incorporation or reduction of molecular oxygen [GO:0016705 molecular_function] (2)                                                                                                                                                                                                                          | Cytochrome P450, E-class, group I [IPR02401] (2); Cytochrome P450, conserved site [IPR017972] (2); Cytochrome P450 [IPR001128] (2)                                                                                                                                                                                                                                                                                                                          | scaffold_4_mRNA_314.1            | C_unshiu_00299_mRNA_23.1    | -                               |
| GF0022140 | 1                             | 1                        | 0                            | Putative polyomucleotide adenyltransferase family protein-like (1); Polyomucleotide adenyltransferase family protein (1) | nucleic acid binding [GO:0003676 molecular_function] (2)                                                                                                                                                                                                                                                                                                                                                                                                                                                                                   | Ribonuclease H-like domain [IPR012337] (2)                                                                                                                                                                                                                                                                                                                                                                                                                  | scaffold_4_mRNA_3122.1           | C_unshiu_00001_mRNA_246.1   | -                               |
| GF0022138 | 1                             | 1                        | 0                            | Somatic embryogenesis receptor kinase (2)                                                                                | protein binding [GO:0005515 molecular_function] (2); transmembrane receptor protein kinase activity [GO:0019199 molecular_function] (1)                                                                                                                                                                                                                                                                                                                                                                                                    | Leucine-rich repeat domain, L domain-like [IPR02675] (2); Leucine-rich repeat [IPR01611] (2); Leucine-rich repeat-containing N-terminal, plant-type [IPR013210] (2); Somatic embryogenesis receptor-like kinase [IPR031048] (1)                                                                                                                                                                                                                             | scaffold_4_mRNA_3109.1           | C_unshiu_00001_mRNA_233.1   | -                               |
| GF0022137 | 1                             | 1                        | 0                            | Hypothetical protein (2)                                                                                                 |                                                                                                                                                                                                                                                                                                                                                                                                                                                                                                                                            |                                                                                                                                                                                                                                                                                                                                                                                                                                                             | scaffold_4_mRNA_3102.1           | C_unshiu_00001_mRNA_228.1   | -                               |
| GF0022136 | 1                             | 1                        | 0                            | Hypothetical protein (2)                                                                                                 | catalytic activity [GO:0003824 molecular_function] (2)                                                                                                                                                                                                                                                                                                                                                                                                                                                                                     | Alanine racemase/group IV decarboxylase, C-terminal [IPR009006] (2); Oxidation-reduction dehydrochlorase 2, C-terminal [IPR022643] (2)                                                                                                                                                                                                                                                                                                                      | scaffold_4_mRNA_310.1            | C_unshiu_00299_mRNA_16.1    | -                               |
| GF0022135 | 1                             | 1                        | 0                            | Hypothetical protein (2)                                                                                                 | response to auxin [GO:0009733 biological_process] (1)                                                                                                                                                                                                                                                                                                                                                                                                                                                                                      | Retrosynposon gag domain [IPR005162] (1)                                                                                                                                                                                                                                                                                                                                                                                                                    | scaffold_4_mRNA_31.1             | C_unshiu_00168_mRNA_38.1    | -                               |
| GF0022134 | 1                             | 1                        | 0                            | SAUR family protein (2)                                                                                                  | Small auxin-up RNA [IPR003676] (1)                                                                                                                                                                                                                                                                                                                                                                                                                                                                                                         |                                                                                                                                                                                                                                                                                                                                                                                                                                                             | scaffold_4_mRNA_3093.1           | C_unshiu_00001_mRNA_219.1   | -                               |
| GF0022133 | 1                             | 1                        | 0                            | Hypothetical protein (1); Alpha-1,4 glucan phosphorylase (1)                                                             | glycoen phosphorylase activity [GO:0008184 molecular_function] (2); carbohydrate metabolic process [GO:0005975 biological_process] (2)                                                                                                                                                                                                                                                                                                                                                                                                     | Glycosyl transferase, family 35 [IPR000811] (2)                                                                                                                                                                                                                                                                                                                                                                                                             | scaffold_4_mRNA_3087.1           | C_unshiu_00001_mRNA_212.1   | -                               |
| GF0022132 | 1                             | 1                        | 0                            | Hypothetical protein (2)                                                                                                 |                                                                                                                                                                                                                                                                                                                                                                                                                                                                                                                                            |                                                                                                                                                                                                                                                                                                                                                                                                                                                             | scaffold_4_mRNA_3084.1           | C_unshiu_00001_mRNA_209.1   | -                               |



| ID        | Num. in <i>C. celeratae</i> | Num. in <i>C. acicola</i> | Num. in <i>P. trifoliate</i> | Note                                                                                                                                                                   | GO                                                                                                                                                                                                                                                                                                                 | InterPro                                                                                                                                                                                                                                                                                                                                                                                              | Members in <i>C. celeratae</i> | Members in <i>C. acicola</i> | Members in <i>P. trifoliate</i> |
|-----------|-----------------------------|---------------------------|------------------------------|------------------------------------------------------------------------------------------------------------------------------------------------------------------------|--------------------------------------------------------------------------------------------------------------------------------------------------------------------------------------------------------------------------------------------------------------------------------------------------------------------|-------------------------------------------------------------------------------------------------------------------------------------------------------------------------------------------------------------------------------------------------------------------------------------------------------------------------------------------------------------------------------------------------------|--------------------------------|------------------------------|---------------------------------|
| GF0022131 | 1                           | 1                         | 0                            | Glycosyltransferase family 61 protein (2)                                                                                                                              | transferase activity, transferring glycosyl group [GO:010657]                                                                                                                                                                                                                                                      | Glycosyltransferase 61 [IPR007657] (1); Glycosyltransferase AER64, uncharacterised [IPR007657] (1)                                                                                                                                                                                                                                                                                                    | scaffold_4_mRNA_3071.1         | C_unshiu_00001_mRNA_196.1    | -                               |
| GF0022130 | 1                           | 1                         | 0                            | Hypothetical protein (2)                                                                                                                                               | transcription factor activity, sequence-specific DNA binding [GO:0003700]                                                                                                                                                                                                                                          | AP2/ERF domain [IPR001471] (1); DNA-binding domain [IPR016177] (1); AP2/ERF transcription factor ERF/PT16 [IPR017392] (1)                                                                                                                                                                                                                                                                             | scaffold_4_mRNA_3055.1         | C_unshiu_00001_mRNA_194.1    | -                               |
| GF0022129 | 1                           | 1                         | 0                            | AP2/ERF domain transcription factor (2)                                                                                                                                | transcription, DNA-templated [GO:0006355 biological_process] (1); DNA binding [GO:0003677 molecular_function] (1)                                                                                                                                                                                                  | EXS, C-terminal [IPR004342] (2); SPX domain [IPR004331] (2); PHO1, SPX domain [IPR034062] (1)                                                                                                                                                                                                                                                                                                         | scaffold_4_mRNA_3044.1         | C_unshiu_00001_mRNA_180.1    | -                               |
| GF0022126 | 1                           | 1                         | 0                            | Phosphate transporter PHO1-like protein (2)                                                                                                                            | integral component of membrane [GO:0016021 cellular_component] (2)                                                                                                                                                                                                                                                 | cell wall biogenesis [GO:0042546 biological_process] (2); membrane [GO:0016021 cellular_component] (2)                                                                                                                                                                                                                                                                                                | scaffold_4_mRNA_3044.1         | C_unshiu_00001_mRNA_168.1    | -                               |
| GF0022125 | 1                           | 1                         | 0                            | Galactoside 2-alpha-L-fucosyltransferase (2)                                                                                                                           | galactoside 2-alpha-L-fucosyltransferase activity [GO:0008107 molecular_function] (2)                                                                                                                                                                                                                              | Xyloglucan fucosyltransferase [IPR004938] (2)                                                                                                                                                                                                                                                                                                                                                         | scaffold_4_mRNA_3040.1         | C_unshiu_00001_mRNA_164.1    | -                               |
| GF0022124 | 1                           | 1                         | 0                            | Expansin (2)                                                                                                                                                           | plant-type cell wall organization [GO:0009664 biological_process] (2); extracellular region [GO:0005576 cellular_component] (2)                                                                                                                                                                                    | Expansin Lol pl [IPR007118] (2); Expansin [IPR002963] (2); Expansin, cellulose-binding-like domain [IPR007117] (2); Expansin-pollen allergen, DPHB domain [IPR007112] (2); scaffold_4_mRNA_304.1 RfpA-like protein, double-psi beta-barrel domain [IPR009009] (1); RfpA-like double-psi beta-barrel domain [IPR009009] (1)                                                                            | scaffold_4_mRNA_304.1          | C_unshiu_00299_mRNA_10.1     | -                               |
| GF0022122 | 1                           | 1                         | 0                            | Appr-1 processing enzyme family protein (2)                                                                                                                            | Macro domain [IPR002589] (2)                                                                                                                                                                                                                                                                                       | Macro domain [IPR002589] (2)                                                                                                                                                                                                                                                                                                                                                                          | scaffold_4_mRNA_303.1          | C_unshiu_00299_mRNA_9.1      | -                               |
| GF0022121 | 1                           | 1                         | 0                            | Hypothetical protein (2)                                                                                                                                               |                                                                                                                                                                                                                                                                                                                    |                                                                                                                                                                                                                                                                                                                                                                                                       | scaffold_4_mRNA_300.1          | C_unshiu_00001_mRNA_132.1    | -                               |
| GF0022120 | 1                           | 1                         | 0                            | Hypothetical protein (2)                                                                                                                                               |                                                                                                                                                                                                                                                                                                                    |                                                                                                                                                                                                                                                                                                                                                                                                       | scaffold_4_mRNA_30.1           | C_unshiu_00168_mRNA_39.1     | -                               |
| GF0022118 | 1                           | 1                         | 0                            | Hypothetical protein (2)                                                                                                                                               |                                                                                                                                                                                                                                                                                                                    |                                                                                                                                                                                                                                                                                                                                                                                                       | scaffold_4_mRNA_299.1          | C_unshiu_00299_mRNA_5.1      | -                               |
| GF0022115 | 1                           | 1                         | 0                            | Hypothetical protein (2)                                                                                                                                               | nucleic acid binding [GO:0003676 molecular_function] (2); ATP binding [GO:0005524 molecular_function] (2)                                                                                                                                                                                                          | P-loop containing nucleoside triphosphate hydrolase [IPR027417] (2); DEAD/DEAH box helicase domain [IPR011545] (2)                                                                                                                                                                                                                                                                                    | scaffold_4_mRNA_297.1          | C_unshiu_00001_mRNA_97.1     | -                               |
| GF0022114 | 1                           | 1                         | 0                            | Hypothetical protein (2)                                                                                                                                               | tRNA (guanine-N2)-methyltransferase activity [GO:0004809 molecular_function] (2); tRNA processing [GO:0008033 biological_process] (2); RNA binding [GO:0003723 molecular_function] (2)                                                                                                                             | S-adenosyl-L-methionine-dependent methyltransferase [IPR029063] (2); tRNA methyltransferase, Tem1 [IPR029052] (2)                                                                                                                                                                                                                                                                                     | scaffold_4_mRNA_296.1          | C_unshiu_00299_mRNA_2.1      | -                               |
| GF0022112 | 1                           | 1                         | 0                            | Nitrate transporter 1.7 (2)                                                                                                                                            | transport [GO:0006810 biological_process] (2); membrane [GO:0016020 cellular_component] (2); transporter activity [GO:0005215 molecular_function] (2)                                                                                                                                                              | Major facilitator superfamily domain [IPR020846] (2); Proton-dependent oligopeptide transporter family [IPR00109] (2)                                                                                                                                                                                                                                                                                 | scaffold_4_mRNA_294.1          | C_unshiu_00001_mRNA_70.1     | -                               |
| GF0022111 | 1                           | 1                         | 0                            | Homoserine dehydrogenase (2)                                                                                                                                           | cellular amino acid metabolic process [GO:0006520 biological_process] (2); oxidation-reduction process [GO:0055114 biological_process] (2)                                                                                                                                                                         | Homoserine dehydrogenase, catalytic [IPR001342] (2); Gliothione S-transferase, C-terminal-like [IPR010987] (2); NAD(P)+binding domain [IPR016040] (2)                                                                                                                                                                                                                                                 | scaffold_4_mRNA_293.1          | C_unshiu_00001_mRNA_59.1     | -                               |
| GF0022110 | 1                           | 1                         | 0                            | TIR-NBS-LRR disease resistance protein (2)                                                                                                                             | protein binding [GO:0005515 molecular_function] (2); ADP binding [GO:0043531 molecular_function] (2); signal transduction [GO:0007165 biological_process] (2)                                                                                                                                                      | Leucine-rich repeat domain, L domain-like [IPR032675] (3); Leucine-rich repeat, typical subtype [IPR003591] (2); Toll/interleukin-1 receptor homology (TIR) domain [IPR000157] (2); NB-ARC [IPR02182] (2); P-loop containing nucleoside triphosphate hydrolase [IPR027417] (2); Winged helix-turn-helix DNA-binding domain [IPR011991] (1)                                                            | scaffold_4_mRNA_292.1          | C_unshiu_00001_mRNA_45.1     | -                               |
| GF0022109 | 1                           | 1                         | 0                            | Hypothetical protein (1); Ribosomal protein S26 (1)                                                                                                                    | structural constituent of ribosome [GO:0003735 molecular_function] (2); translation [GO:0006412 biological_process] (2); intracellular [GO:0005622 cellular_component] (2); ribosome [GO:0008404 cellular_component] (2)                                                                                           | Ribosomal protein S26e [IPR000892] (2)                                                                                                                                                                                                                                                                                                                                                                | scaffold_4_mRNA_292.1          | C_unshiu_01756_mRNA_8.1      | -                               |
| GF0022108 | 1                           | 1                         | 0                            | Probably inactive leucine-rich repeat receptor-like protein kinase (2)                                                                                                 | protein kinase activity [GO:0004672 molecular_function] (2); protein phosphorylation [GO:0006468 biological_process] (2); ATP binding [GO:0005524 molecular_function] (2); protein binding [GO:0005515 molecular_function] (1)                                                                                     | Protein kinase-like domain [IPR011009] (2); Leucine-rich repeat domain, L domain-like [IPR032675] (2); Protein kinase domain [IPR000719] (2); Serine-threonine/tyrosine-protein kinase catalytic domain [IPR012451] (1); Leucine-rich repeat [IPR016111] (1); Serine-threonine/tyrosine-protein kinase, catalytic domain [IPR012451] (1); Concanavalin A-like lectin/glucanase domain [IPR013320] (1) | scaffold_4_mRNA_291.1          | C_unshiu_00001_mRNA_40.1     | -                               |
| GF0022107 | 1                           | 1                         | 0                            | Hypothetical protein (2)                                                                                                                                               | nucleic acid binding [GO:0003676 molecular_function] (2); RNA-DNA hybrid ribonuclease activity [GO:0004523 molecular_function] (2)                                                                                                                                                                                 | Ribonuclease H domain [IPR002156] (2); Ribonuclease H1, N-terminal [IPR011320] (2); Ribonuclease H-like domain [IPR012337] (2)                                                                                                                                                                                                                                                                        | scaffold_4_mRNA_290.1          | C_unshiu_00001_mRNA_23.1     | -                               |
| GF0022106 | 1                           | 1                         | 0                            | Putative rase H family protein (2)                                                                                                                                     |                                                                                                                                                                                                                                                                                                                    |                                                                                                                                                                                                                                                                                                                                                                                                       | scaffold_4_mRNA_288.1          | C_unshiu_00001_mRNA_6.1      | -                               |
| GF0022105 | 1                           | 1                         | 0                            | Hypothetical protein (2)                                                                                                                                               |                                                                                                                                                                                                                                                                                                                    |                                                                                                                                                                                                                                                                                                                                                                                                       | scaffold_4_mRNA_288.1          | C_unshiu_00004_mRNA_11.1     | -                               |
| GF0022104 | 1                           | 1                         | 0                            | Hypothetical protein (2)                                                                                                                                               | transmembrane transporter activity [GO:0022857 molecular_function] (2); membrane [GO:0016020 cellular_component] (2); integral component of membrane [GO:0016021 cellular_component] (2)                                                                                                                           | WAT1-related protein [IPR030184] (2); EamA domain [IPR000620] (2); Poliamin-like domain [IPR00502] (1)                                                                                                                                                                                                                                                                                                | scaffold_4_mRNA_287.1          | C_unshiu_00004_mRNA_16.1     | -                               |
| GF0022103 | 1                           | 1                         | 0                            | Nodulin MN2/EamA-like transporter family protein (2)                                                                                                                   | integral component of membrane [GO:0016021 cellular_component] (2); transmembrane transporter activity [GO:0022857 molecular_function] (2); membrane [GO:0016020 cellular_component] (2)                                                                                                                           | EamA domain [IPR000620] (2); WAT1-related protein [IPR030184] (2)                                                                                                                                                                                                                                                                                                                                     | scaffold_4_mRNA_287.1          | C_unshiu_00004_mRNA_20.1     | -                               |
| GF0022102 | 1                           | 1                         | 0                            | Cytochrome P450 82A4 (2)                                                                                                                                               | heme binding [GO:0020037 molecular_function] (2); iron ion binding [GO:0005506 molecular_function] (2); oxidoreductase activity, acting on paired donors, with incorporation or reduction of molecular oxygen [GO:0016705 molecular_function] (2); oxidation-reduction process [GO:0055114 biological_process] (2) | Cytochrome P450 [IPR001128] (2); Cytochrome P450, conserved site [IPR017972] (2); Cytochrome P450, E-class, group I [IPR002401] (2)                                                                                                                                                                                                                                                                   | scaffold_4_mRNA_285.1          | C_unshiu_01756_mRNA_4.1      | -                               |
| GF0022101 | 1                           | 1                         | 0                            | HD domain-containing metal-dependent phosphohydrolase family protein isoform 1 (1); HD domain-containing metal-dependent phosphohydrolase family protein isoform 2 (1) |                                                                                                                                                                                                                                                                                                                    | HD domain [IPR006674] (2); HD/PEase domain [IPR03607] (2)                                                                                                                                                                                                                                                                                                                                             | scaffold_4_mRNA_284.1          | C_unshiu_00004_mRNA_43.1     | -                               |
| GF0022099 | 1                           | 1                         | 0                            | Glabrous 1 (1); Hypothetical protein (1)                                                                                                                               | DNA binding [GO:0003677 molecular_function] (2)                                                                                                                                                                                                                                                                    | SANT/Myb domain [IPR01005] (2); Myb-like domain [IPR017877] (1); Myb domain [IPR017930] (1); Homeobox domain-like [IPR009057] (1); Homosodomain-like [IPR009057] (1)                                                                                                                                                                                                                                  | scaffold_4_mRNA_284.1          | C_unshiu_00004_mRNA_51.1     | -                               |
| GF0022098 | 1                           | 1                         | 0                            | Hypothetical protein (2)                                                                                                                                               |                                                                                                                                                                                                                                                                                                                    |                                                                                                                                                                                                                                                                                                                                                                                                       | scaffold_4_mRNA_284.1          | C_unshiu_01756_mRNA_3.1      | -                               |
| GF0022096 | 1                           | 1                         | 0                            | Pyroldone-carboxylate peptidase family protein (2)                                                                                                                     | pyroglutamy-peptidase activity [GO:0016920 molecular_function] (2); cytosol [GO:0005829 cellular_component] (2); proteolysis [GO:0006508 biological_process] (2)                                                                                                                                                   | Peptidase C15, pyroglutamy peptidase I [IPR00816] (2); Peptidase C15, pyroglutamy peptidase I-like [IPR016125] (2); Pyroglutamy peptidase I, Cys active site [IPR033694] (1)                                                                                                                                                                                                                          | scaffold_4_mRNA_281.1          | C_unshiu_00004_mRNA_69.2     | -                               |
| GF0022095 | 1                           | 1                         | 0                            | UDP-N-acetylglucosamine-N-acetylmannamyl-phosphoryl-muricaproneol N-acetylglucosamine transferase isoform 5 (2)                                                        |                                                                                                                                                                                                                                                                                                                    |                                                                                                                                                                                                                                                                                                                                                                                                       | scaffold_4_mRNA_281.1          | C_unshiu_00004_mRNA_77.1     | -                               |
| GF0022094 | 1                           | 1                         | 0                            | Signal recognition particle receptor subunit beta (2)                                                                                                                  | GTP binding [GO:0005525 molecular_function] (2); intracellular [GO:0005622 cellular_component] (2); small GTPase mediated signal transduction [GO:0007264 biological_process] (2)                                                                                                                                  | Small GTPase superfamily, ARF type [IPR024156] (2); Signal recognition particle receptor, beta subunit [IPR019099] (2); P-loop containing nucleoside triphosphate hydrolase [IPR027417] (2)                                                                                                                                                                                                           | scaffold_4_mRNA_281.1          | C_unshiu_00004_mRNA_78.1     | -                               |
| GF0022091 | 1                           | 1                         | 0                            | Hypothetical protein (2)                                                                                                                                               | carbon-sulfur lyase activity [GO:0016846 molecular_function] (1); catalytic activity [GO:0003824 molecular_function] (1)                                                                                                                                                                                           | Pyridoxal phosphate-dependent transferase, subdomain 2 [IPR015422] (1); Pyridoxal phosphate-dependent transferase [IPR015424] (1); Alliinase, C-terminal [IPR006948] (1)                                                                                                                                                                                                                              | scaffold_4_mRNA_279.1          | C_unshiu_00004_mRNA_95.1     | -                               |
| GF0022090 | 1                           | 1                         | 0                            | Hypothetical protein (2)                                                                                                                                               |                                                                                                                                                                                                                                                                                                                    | Protein of unknown function DU4228, plant [IPR025322] (2)                                                                                                                                                                                                                                                                                                                                             | scaffold_4_mRNA_279.1          | C_unshiu_00004_mRNA_97.1     | -                               |
| GF0022089 | 1                           | 1                         | 0                            | Hypothetical protein (2)                                                                                                                                               |                                                                                                                                                                                                                                                                                                                    |                                                                                                                                                                                                                                                                                                                                                                                                       | scaffold_4_mRNA_279.1          | C_unshiu_00058_mRNA_74.1     | -                               |

| ID        | Num. in <i>C. clementinae</i> | Num. in <i>C. acutis</i> | Num. in <i>P. trifoliata</i> | Note                                                               | GO                                                                                                                                                                                                                                                                                                                                                                                                                                                                                                                                                                                                                                                                                                                                                                                                                                                                                                                                       | InterPro                                                                                                                                                                                                                                                                                                                                                                                                                                                                                                                                                                            | Members in <i>C. clementinae</i> | Members in <i>C. acutis</i> | Members in <i>P. trifoliata</i> |
|-----------|-------------------------------|--------------------------|------------------------------|--------------------------------------------------------------------|------------------------------------------------------------------------------------------------------------------------------------------------------------------------------------------------------------------------------------------------------------------------------------------------------------------------------------------------------------------------------------------------------------------------------------------------------------------------------------------------------------------------------------------------------------------------------------------------------------------------------------------------------------------------------------------------------------------------------------------------------------------------------------------------------------------------------------------------------------------------------------------------------------------------------------------|-------------------------------------------------------------------------------------------------------------------------------------------------------------------------------------------------------------------------------------------------------------------------------------------------------------------------------------------------------------------------------------------------------------------------------------------------------------------------------------------------------------------------------------------------------------------------------------|----------------------------------|-----------------------------|---------------------------------|
| GF0022088 | 1                             | 1                        | 0                            | Hypothetical protein (2)                                           | clathrin adaptor complex [GO:0030131 cellular_component] (2); intracellular protein transport [GO:0006886 biological_process] (2); transport [GO:0006810 biological_process] (2); protein phosphorylation [GO:0006468 biological_process] (2); protein kinase activity [GO:0004672 molecular_function] (2); vesicle-mediated transport [GO:0016192 biological_process] (2); ATP binding [GO:0005524 molecular_function] (2)                                                                                                                                                                                                                                                                                                                                                                                                                                                                                                              | Serine/threonine-protein kinase, active site [IPRO08271] (2); Protein kinase, ATP binding site [IPRO17441] (2); Longin-like domain [IPRO11012] (2); Protein kinase-like domain [IPRO11009] (2); Clathrin adaptor, mu subunit [IPRO01392] (2); Clathrin adaptor, mu subunit, conserved site [IPRO18240] (2); AP complex, mu-sigma subunit [IPRO22751] (2); Protein kinase domain [IPRO00719] (2); Mu homology domain [IPRO28565] (2); Serine/threonine dual specificity protein kinase, catalytic domain [IPRO12290] (1); Concavallin A-like lectin/glucanase domain [IPRO13320] (1) | scaffold_4_mRNA_2776.1           | C_unshii_00004_mRNA_114.1   | -                               |
| GF0022087 | 1                             | 1                        | 0                            | Ribosomal protein S21 family protein (2)                           | ribosome [GO:0005840 cellular_component] (2); structural constituent of ribosome [GO:0003735 molecular_function] (2); translation [GO:0006412 biological_process] (2)                                                                                                                                                                                                                                                                                                                                                                                                                                                                                                                                                                                                                                                                                                                                                                    | Ribosomal protein S21 [IPRO01911] (2)                                                                                                                                                                                                                                                                                                                                                                                                                                                                                                                                               | scaffold_4_mRNA_2751.1           | C_unshii_00004_mRNA_140.1   | -                               |
| GF0022086 | 1                             | 1                        | 0                            | Protein terminal ear1 (2)                                          | nucleic acid binding [GO:0003676 molecular_function] (2); nucleoside binding [GO:0000166 molecular_function] (1)                                                                                                                                                                                                                                                                                                                                                                                                                                                                                                                                                                                                                                                                                                                                                                                                                         | RNA recognition motif domain [IPRO05094] (2); Terminal EAR1-like, RNA recognition motif 3 [IPRO34458] (1); Mc2/Mc2-like, C-terminal RNA recognition motif [IPRO07011] (1); RNA recognition motif 2 [IPRO07201] (1); Nucleotide-binding alpha-beta plat domain [IPRO12677] (1)                                                                                                                                                                                                                                                                                                       | scaffold_4_mRNA_2729.1           | C_unshii_00004_mRNA_165.1   | -                               |
| GF0022084 | 1                             | 1                        | 0                            | E3 ubiquitin-protein ligase mb1 (2)                                | protein binding [GO:0005515 molecular_function] (2)                                                                                                                                                                                                                                                                                                                                                                                                                                                                                                                                                                                                                                                                                                                                                                                                                                                                                      | Ankyrin repeat [IPRO02110] (2); Ankyrin repeat-containing domain [IPRO20683] (2)                                                                                                                                                                                                                                                                                                                                                                                                                                                                                                    | scaffold_4_mRNA_2686.1           | C_unshii_00010_mRNA_37.1    | -                               |
| GF0022083 | 1                             | 1                        | 0                            | Putative F-box protein At1g67623 (2)                               | protein binding [GO:0005515 molecular_function] (1)                                                                                                                                                                                                                                                                                                                                                                                                                                                                                                                                                                                                                                                                                                                                                                                                                                                                                      | Tetratricopeptide-like helical domain [IPRO11900] (1); F-box domain [IPRO01810] (1)                                                                                                                                                                                                                                                                                                                                                                                                                                                                                                 | scaffold_4_mRNA_2681.1           | C_unshii_00010_mRNA_41.1    | -                               |
| GF0022082 | 1                             | 1                        | 0                            | Ribosome silencing factor (2)                                      | Protein lojap/ribosomal silencing factor RaS [IPRO04394] (2)                                                                                                                                                                                                                                                                                                                                                                                                                                                                                                                                                                                                                                                                                                                                                                                                                                                                             | AAA-ATPase domain [IPRO03593] (1); AAA-type ATPase, N-terminal domain [IPRO27533] (1); P-loop containing nucleoside triphosphate hydrolase [IPRO27471] (1); ATPase, AAA-type, core [IPRO03599] (1); ATPase, AAA-type, conserved site [IPRO03960] (1)                                                                                                                                                                                                                                                                                                                                | scaffold_4_mRNA_2680.1           | C_unshii_00010_mRNA_42.1    | -                               |
| GF0022081 | 1                             | 1                        | 0                            | Putative mitochondrial chaperone hcs1 (2)                          | ATP binding [GO:0005524 molecular_function] (1)                                                                                                                                                                                                                                                                                                                                                                                                                                                                                                                                                                                                                                                                                                                                                                                                                                                                                          | Rubber elongation factor [IPRO08802] (2)                                                                                                                                                                                                                                                                                                                                                                                                                                                                                                                                            | scaffold_4_mRNA_2639.1           | C_unshii_00010_mRNA_82.1    | -                               |
| GF0022078 | 1                             | 1                        | 0                            | Small rubber particle protein (2)                                  | nucleus [GO:0005634 cellular_component] (2); DNA binding [GO:0003677 molecular_function] (2)                                                                                                                                                                                                                                                                                                                                                                                                                                                                                                                                                                                                                                                                                                                                                                                                                                             | Transcription factor, SBP-box [IPRO04333] (2)                                                                                                                                                                                                                                                                                                                                                                                                                                                                                                                                       | scaffold_4_mRNA_2627.1           | C_unshii_00010_mRNA_98.1    | -                               |
| GF0022077 | 1                             | 1                        | 0                            | Squamosa promoter-binding-like protein 12 (2)                      | DNA binding [GO:0003677 molecular_function] (2); nucleus [GO:0005634 cellular_component] (2)                                                                                                                                                                                                                                                                                                                                                                                                                                                                                                                                                                                                                                                                                                                                                                                                                                             | Transcription factor, SBP-box [IPRO04333] (2)                                                                                                                                                                                                                                                                                                                                                                                                                                                                                                                                       | scaffold_4_mRNA_2610.1           | C_unshii_00010_mRNA_113.1   | -                               |
| GF0022076 | 1                             | 1                        | 0                            | Squamosa promoter-binding-like protein 16 (2)                      | regulation of transcription, DNA-templated [GO:0006355 biological_process] (2); DNA binding [GO:0003677 molecular_function] (2)                                                                                                                                                                                                                                                                                                                                                                                                                                                                                                                                                                                                                                                                                                                                                                                                          | NAC domain [IPRO03441] (2)                                                                                                                                                                                                                                                                                                                                                                                                                                                                                                                                                          | scaffold_4_mRNA_2603.1           | C_unshii_00010_mRNA_120.1   | -                               |
| GF0022075 | 1                             | 1                        | 0                            | AT1G27990 protein (2)                                              | regulation of transcription, DNA-templated [GO:0006355 biological_process] (2); DNA binding [GO:0003677 molecular_function] (2)                                                                                                                                                                                                                                                                                                                                                                                                                                                                                                                                                                                                                                                                                                                                                                                                          | Protein kinase-like domain [IPRO11009] (1)                                                                                                                                                                                                                                                                                                                                                                                                                                                                                                                                          | scaffold_4_mRNA_2552.1           | C_unshii_00015_mRNA_95.1    | -                               |
| GF0022074 | 1                             | 1                        | 0                            | NAC domain-containing protein 29 (2)                               | regulation of transcription, DNA-templated [GO:0006355 biological_process] (2); DNA binding [GO:0003677 molecular_function] (2)                                                                                                                                                                                                                                                                                                                                                                                                                                                                                                                                                                                                                                                                                                                                                                                                          | Alpha/Beta hydrolase fold [IPRO29058] (2); Alpha/beta hydrolase fold-1 [IPRO00073] (2)                                                                                                                                                                                                                                                                                                                                                                                                                                                                                              | scaffold_4_mRNA_2546.1           | C_unshii_00015_mRNA_89.1    | -                               |
| GF0022072 | 1                             | 1                        | 0                            | Hypothetical protein (2)                                           | carbohydrate metabolic process [GO:0005975 biological_process] (2); 6-phosphogluconolactonase activity [GO:0017057 molecular_function] (2); penicillinase activity [GO:0006098 biological_process] (2)                                                                                                                                                                                                                                                                                                                                                                                                                                                                                                                                                                                                                                                                                                                                   | 6-phosphogluconolactonase, DevB-type [IPRO05900] (2); Glucosamine/galactosamine-6-phosphate isomerase [IPRO06148] (2)                                                                                                                                                                                                                                                                                                                                                                                                                                                               | scaffold_4_mRNA_2538.2           | C_unshii_00015_mRNA_81.3    | -                               |
| GF0022070 | 1                             | 1                        | 0                            | Glucosamine/galactosamine-6-phosphate isomerase family protein (2) | carbohydrate metabolic process [GO:0005975 biological_process] (2); 6-phosphogluconolactonase activity [GO:0017057 molecular_function] (2); penicillinase activity [GO:0006098 biological_process] (2)                                                                                                                                                                                                                                                                                                                                                                                                                                                                                                                                                                                                                                                                                                                                   | NTF2-like domain [IPRO032710] (2); Wound-induced protein, Wun1 [IPRO09798] (2)                                                                                                                                                                                                                                                                                                                                                                                                                                                                                                      | scaffold_4_mRNA_253.1            | C_unshii_00058_mRNA_47.1    | -                               |
| GF0022069 | 1                             | 1                        | 0                            | Senescence associated gene 20, putative (2)                        | protein dimerization activity [GO:0046093 molecular_function] (2); nucleus [GO:0005634 cellular_component] (2); DNA binding [GO:0003677 molecular_function] (2); regulation of transcription, DNA-templated [GO:0006355 biological_process] (2); transcription factor activity, sequence-specific DNA binding [GO:0003700 molecular_function] (2); RNA polymerase II regulatory region sequence-specific DNA binding [GO:0000977 molecular_function] (1); positive regulation of transcription from RNA polymerase II promoter [GO:0050944 biological_process] (1); MAPK cascade [GO:0000165 biological_process] (1); heme binding [GO:0020037 molecular_function] (2); iron ion binding [GO:0005506 molecular_function] (2); oxidoreductase activity, acting on paired donors, with incorporation or reduction of molecular oxygen [GO:0016705 molecular_function] (2); oxidation-reduction process [GO:0005514 biological_process] (2) | Transcription factor, MADS-box [IPRO02100] (2); Transcription factor, K-box [IPRO02487] (2); MADS MEF2-like [IPRO33896] (1)                                                                                                                                                                                                                                                                                                                                                                                                                                                         | scaffold_4_mRNA_2524.1           | C_unshii_00015_mRNA_66.1    | -                               |
| GF0022068 | 1                             | 1                        | 0                            | Developmental protein SEPALLATA 2 (2)                              | transcription factor activity, sequence-specific DNA binding [GO:0003700 molecular_function] (2); RNA polymerase II regulatory region sequence-specific DNA binding [GO:0000977 molecular_function] (1); positive regulation of transcription from RNA polymerase II promoter [GO:0050944 biological_process] (1); MAPK cascade [GO:0000165 biological_process] (1); heme binding [GO:0020037 molecular_function] (2); iron ion binding [GO:0005506 molecular_function] (2); oxidoreductase activity, acting on paired donors, with incorporation or reduction of molecular oxygen [GO:0016705 molecular_function] (2); oxidation-reduction process [GO:0005514 biological_process] (2)                                                                                                                                                                                                                                                  | Cytochrome P450, E-class, group I [IPRO02401] (2); Cytochrome P450 [IPRO01128] (2); Cytochrome P450, conserved site [IPRO17972] (1)                                                                                                                                                                                                                                                                                                                                                                                                                                                 | scaffold_4_mRNA_2518.1           | C_unshii_00015_mRNA_58.1    | -                               |
| GF0022067 | 1                             | 1                        | 0                            | Cytochrome P450 734A1 (2)                                          | transcription factor activity, sequence-specific DNA binding [GO:0003700 molecular_function] (2); RNA polymerase II regulatory region sequence-specific DNA binding [GO:0000977 molecular_function] (1); positive regulation of transcription from RNA polymerase II promoter [GO:0050944 biological_process] (1); MAPK cascade [GO:0000165 biological_process] (1); heme binding [GO:0020037 molecular_function] (2); iron ion binding [GO:0005506 molecular_function] (2); oxidoreductase activity, acting on paired donors, with incorporation or reduction of molecular oxygen [GO:0016705 molecular_function] (2); oxidation-reduction process [GO:0005514 biological_process] (2)                                                                                                                                                                                                                                                  | Cytochrome P450 [IPRO01128] (2); Cytochrome P450, E-class, group I [IPRO02401] (2); Cytochrome P450, conserved site [IPRO17972] (1)                                                                                                                                                                                                                                                                                                                                                                                                                                                 | scaffold_4_mRNA_2516.1           | C_unshii_00015_mRNA_56.1    | -                               |
| GF0022066 | 1                             | 1                        | 0                            | Cytochrome P450 734A1 (2)                                          | transcription factor activity, sequence-specific DNA binding [GO:0003700 molecular_function] (2); RNA polymerase II regulatory region sequence-specific DNA binding [GO:0000977 molecular_function] (1); positive regulation of transcription from RNA polymerase II promoter [GO:0050944 biological_process] (1); MAPK cascade [GO:0000165 biological_process] (1); heme binding [GO:0020037 molecular_function] (2); iron ion binding [GO:0005506 molecular_function] (2); oxidoreductase activity, acting on paired donors, with incorporation or reduction of molecular oxygen [GO:0016705 molecular_function] (2); oxidation-reduction process [GO:0005514 biological_process] (2)                                                                                                                                                                                                                                                  | Cytochrome P450 [IPRO01128] (2); Cytochrome P450, E-class, group I [IPRO02401] (2); Cytochrome P450, conserved site [IPRO17972] (1)                                                                                                                                                                                                                                                                                                                                                                                                                                                 | scaffold_4_mRNA_2514.1           | C_unshii_00015_mRNA_54.1    | -                               |
| GF0022065 | 1                             | 1                        | 0                            | Hypothetical protein (2)                                           | nucleic acid binding [GO:0003676 molecular_function] (2)                                                                                                                                                                                                                                                                                                                                                                                                                                                                                                                                                                                                                                                                                                                                                                                                                                                                                 | Ribonuclease H-like domain [IPRO12317] (2)                                                                                                                                                                                                                                                                                                                                                                                                                                                                                                                                          | scaffold_4_mRNA_2507.1           | C_unshii_00023_mRNA_64.1    | -                               |
| GF0022064 | 1                             | 1                        | 0                            | Hypothetical protein (2)                                           | nucleic acid binding [GO:0003676 molecular_function] (2)                                                                                                                                                                                                                                                                                                                                                                                                                                                                                                                                                                                                                                                                                                                                                                                                                                                                                 | Acy-CoA N-acyltransferase [IPRO16181] (2); GNAT domain [IPRO00152] (2)                                                                                                                                                                                                                                                                                                                                                                                                                                                                                                              | scaffold_4_mRNA_2478.1           | C_unshii_00030_mRNA_19.1    | -                               |
| GF0022063 | 1                             | 1                        | 0                            | Putative N-acetyltransferase yf52 (2)                              | N-acetyltransferase activity [GO:0004080 molecular_function] (2)                                                                                                                                                                                                                                                                                                                                                                                                                                                                                                                                                                                                                                                                                                                                                                                                                                                                         | HD domain [IPRO06674] (2); HD/PDEase domain [IPRO03607] (2)                                                                                                                                                                                                                                                                                                                                                                                                                                                                                                                         | scaffold_4_mRNA_2455.1           | C_unshii_00035_mRNA_4.1     | -                               |
| GF0022062 | 1                             | 1                        | 0                            | Metal-dependent phosphohydrolase (2)                               | metal ion binding [GO:0005506 molecular_function] (2); oxidoreductase activity, acting on paired donors, with incorporation or reduction of molecular oxygen [GO:0016705 molecular_function] (2); oxidation-reduction process [GO:0005514 biological_process] (2)                                                                                                                                                                                                                                                                                                                                                                                                                                                                                                                                                                                                                                                                        | HD domain [IPRO06674] (2); HD/PDEase domain [IPRO03607] (2)                                                                                                                                                                                                                                                                                                                                                                                                                                                                                                                         | scaffold_4_mRNA_2453.1           | C_unshii_00035_mRNA_6.1     | -                               |
| GF0022061 | 1                             | 1                        | 0                            | Hypothetical protein (2)                                           | metal ion binding [GO:0005506 molecular_function] (2); oxidoreductase activity, acting on paired donors, with incorporation or reduction of molecular oxygen [GO:0016705 molecular_function] (2); oxidation-reduction process [GO:0005514 biological_process] (2)                                                                                                                                                                                                                                                                                                                                                                                                                                                                                                                                                                                                                                                                        | HD domain [IPRO06674] (2); HD/PDEase domain [IPRO03607] (2)                                                                                                                                                                                                                                                                                                                                                                                                                                                                                                                         | scaffold_4_mRNA_2453.1           | C_unshii_00035_mRNA_6.1     | -                               |
| GF0022058 | 1                             | 1                        | 0                            | Allene oxide cyclase (2)                                           | isomerase activity [GO:0016853 molecular_function] (1); chloroplast [GO:0005907 cellular_component] (1)                                                                                                                                                                                                                                                                                                                                                                                                                                                                                                                                                                                                                                                                                                                                                                                                                                  | Allene oxide cyclase [IPRO09410] (1)                                                                                                                                                                                                                                                                                                                                                                                                                                                                                                                                                | scaffold_4_mRNA_2415.1           | C_unshii_00099_mRNA_21.1    | -                               |
| GF0022055 | 1                             | 1                        | 0                            | Hypothetical protein (2)                                           | isomerase activity [GO:0016853 molecular_function] (1); chloroplast [GO:0005907 cellular_component] (1)                                                                                                                                                                                                                                                                                                                                                                                                                                                                                                                                                                                                                                                                                                                                                                                                                                  | Allene oxide cyclase [IPRO09410] (1)                                                                                                                                                                                                                                                                                                                                                                                                                                                                                                                                                | scaffold_4_mRNA_2369.1           | C_unshii_00039_mRNA_72.1    | -                               |
| GF0022054 | 1                             | 1                        | 0                            | Transcription factor MYB1R1 (1); Hypothetical protein (1)          | DNA binding [GO:0003677 molecular_function] (2)                                                                                                                                                                                                                                                                                                                                                                                                                                                                                                                                                                                                                                                                                                                                                                                                                                                                                          | Myb domain [IPRO17930] (2); Myb domain, plant [IPRO06447] (2); SANT/Myb domain [IPRO01005] (2); SANT domain [IPRO17884] (2); Homeobox domain-like [IPRO09057] (1); Homeobox-like [IPRO09057] (1); Armadillo-like helical [IPRO11989] (1)                                                                                                                                                                                                                                                                                                                                            | scaffold_4_mRNA_2362.1           | C_unshii_00039_mRNA_67.1    | -                               |
| GF0022053 | 1                             | 1                        | 0                            | Hypothetical protein (2)                                           | DNA binding [GO:0003677 molecular_function] (2)                                                                                                                                                                                                                                                                                                                                                                                                                                                                                                                                                                                                                                                                                                                                                                                                                                                                                          | Myb domain [IPRO17930] (2); Myb domain, plant [IPRO06447] (2); SANT/Myb domain [IPRO01005] (2); SANT domain [IPRO17884] (2); Homeobox domain-like [IPRO09057] (1); Homeobox-like [IPRO09057] (1); Armadillo-like helical [IPRO11989] (1)                                                                                                                                                                                                                                                                                                                                            | scaffold_4_mRNA_2349.1           | C_unshii_00039_mRNA_54.1    | -                               |
| GF0022052 | 1                             | 1                        | 0                            | rRNA 2'-O-methyltransferase fibrillarln (2)                        | rRNA processing [GO:0008033 biological_process] (2); RNA binding [GO:0003723 molecular_function] (2); rRNA processing [GO:0006364 biological_process] (2); methyltransferase activity [GO:0008168 molecular_function] (2)                                                                                                                                                                                                                                                                                                                                                                                                                                                                                                                                                                                                                                                                                                                | Fibrillarln, conserved site [IPRO20813] (2); S-adenosyl-L-methionine-dependent methyltransferase [IPRO29063] (2); Fibrillarln [IPRO00692] (2)                                                                                                                                                                                                                                                                                                                                                                                                                                       | scaffold_4_mRNA_2321.1           | C_unshii_00039_mRNA_28.1    | -                               |
| GF0022049 | 1                             | 1                        | 0                            | Glutathione transferase (2)                                        | protein binding [GO:0005515 molecular_function] (2)                                                                                                                                                                                                                                                                                                                                                                                                                                                                                                                                                                                                                                                                                                                                                                                                                                                                                      | Glutathione S-transferase, N-terminal [IPRO04045] (2); Glutathione S-transferase, C-terminal like [IPRO10987] (2); Thioredoxin-like fold [IPRO12336] (2); Glutathione S-transferase, C-terminal [IPRO04046] (2)                                                                                                                                                                                                                                                                                                                                                                     | scaffold_4_mRNA_2293.1           | C_unshii_00040_mRNA_24.1    | -                               |
| GF0022048 | 1                             | 1                        | 0                            | Hypothetical protein (2)                                           | protein binding [GO:0005515 molecular_function] (2)                                                                                                                                                                                                                                                                                                                                                                                                                                                                                                                                                                                                                                                                                                                                                                                                                                                                                      | Tetratricopeptide-like helical domain [IPRO11990] (2); Tetratricopeptide repeat [IPRO19734] (2)                                                                                                                                                                                                                                                                                                                                                                                                                                                                                     | scaffold_4_mRNA_2292.1           | C_unshii_00040_mRNA_21.1    | -                               |
| GF0022047 | 1                             | 1                        | 0                            | Abscisic acid receptor PYL8 (2)                                    | protein binding [GO:0005515 molecular_function] (2)                                                                                                                                                                                                                                                                                                                                                                                                                                                                                                                                                                                                                                                                                                                                                                                                                                                                                      | Polyketide cyclase dehydrase [IPRO19557] (2); START-like domain [IPRO23393] (2)                                                                                                                                                                                                                                                                                                                                                                                                                                                                                                     | scaffold_4_mRNA_229.1            | C_unshii_00012_mRNA_108.1   | -                               |
| GF0022046 | 1                             | 1                        | 0                            | Putative yef19 (2)                                                 | membrane [GO:0016020 cellular_component] (2)                                                                                                                                                                                                                                                                                                                                                                                                                                                                                                                                                                                                                                                                                                                                                                                                                                                                                             | CCB3/YagF [IPRO03425] (2)                                                                                                                                                                                                                                                                                                                                                                                                                                                                                                                                                           | scaffold_4_mRNA_2262.1           | C_unshii_00039_mRNA_21.1    | -                               |
| GF0022045 | 1                             | 1                        | 0                            | DUF177 domain protein (2)                                          | protein binding [GO:0005515 molecular_function] (2)                                                                                                                                                                                                                                                                                                                                                                                                                                                                                                                                                                                                                                                                                                                                                                                                                                                                                      | Protein of unknown function DUF177 [IPRO03772] (1); Large ribosomal RNA subunit accumulation protein YecD [IPRO03772] (1)                                                                                                                                                                                                                                                                                                                                                                                                                                                           | scaffold_4_mRNA_2259.1           | C_unshii_00039_mRNA_24.1    | -                               |

| ID        | Num. in <i>C. clementinae</i> | Num. in <i>C. acutula</i> | Num. in <i>P. trifoliata</i> | Note                                                                                                                     | GO                                                                                                                                                                                                                                                                                                                                                                                                        | InterPro                                                                                                                                                                                                                                                                               | Members in <i>C. clementinae</i> | Members in <i>C. acutula</i> | Members in <i>P. trifoliata</i> |
|-----------|-------------------------------|---------------------------|------------------------------|--------------------------------------------------------------------------------------------------------------------------|-----------------------------------------------------------------------------------------------------------------------------------------------------------------------------------------------------------------------------------------------------------------------------------------------------------------------------------------------------------------------------------------------------------|----------------------------------------------------------------------------------------------------------------------------------------------------------------------------------------------------------------------------------------------------------------------------------------|----------------------------------|------------------------------|---------------------------------|
| GF0022044 | 1                             | 1                         | 0                            | Hypothetical protein (2)                                                                                                 | ATP binding [GO:000524 molecular_function] (2)                                                                                                                                                                                                                                                                                                                                                            | P-loop containing nucleoside triphosphate hydrolase [IPRO0741] (2); Helicase superfamily 1/2, ATP-binding domain [IPRO14001] (2); SNF2-related, N-terminal domain [IPRO0030] (2)                                                                                                       | scaffold_4_mRNA_225.1            | C_unshiu_00012_mRNA_104.1    | -                               |
| GF0022043 | 1                             | 1                         | 0                            | Hypothetical protein (2)                                                                                                 |                                                                                                                                                                                                                                                                                                                                                                                                           |                                                                                                                                                                                                                                                                                        | scaffold_4_mRNA_2236.1           | C_unshiu_00130_mRNA_27.1     | -                               |
| GF0022042 | 1                             | 1                         | 0                            | Transcription initiation factor TFIIID subunit 9 (1); Putative transcription initiation factor TFIIID subunit 9-like (1) | DNA-templated transcription, initiation [GO:0006352 biological_process] (2); protein heterodimerization activity [GO:0046082 molecular_function] (2); nucleus [GO:0005634 cellular_component] (2); histone lysine methylation [GO:00434968 biological_process] (2); zinc ion binding [GO:0008270 molecular_function] (2); histone-lysine N-methyltransferase activity [GO:0018024 molecular_function] (2) | Histone-fold [IPRO09072] (2); Transcription initiation factor TAF131 [IPRO03162] (2)                                                                                                                                                                                                   | scaffold_4_mRNA_2229.1           | C_unshiu_00130_mRNA_34.1     | -                               |
| GF0022041 | 1                             | 1                         | 0                            | Histone-lysine N-methyltransferase SUVR4 (2)                                                                             |                                                                                                                                                                                                                                                                                                                                                                                                           | Pe-SET domain [IPRO07728] (2); WYL-D domain [IPRO18848] (2); Pre-SET zinc-binding sub-group [IPRO03606] (1)                                                                                                                                                                            | scaffold_4_mRNA_2226.1           | C_unshiu_00130_mRNA_36.1     | -                               |
| GF0022040 | 1                             | 1                         | 0                            | Cysteine-rich repeat secretory protein 3 (2)                                                                             |                                                                                                                                                                                                                                                                                                                                                                                                           | Gnk2-homologous domain [IPRO02902] (2)                                                                                                                                                                                                                                                 | scaffold_4_mRNA_2225.1           | C_unshiu_00130_mRNA_37.1     | -                               |
| GF0022039 | 1                             | 1                         | 0                            | General transcription factor-like zinc finger protein, putative (2)                                                      |                                                                                                                                                                                                                                                                                                                                                                                                           |                                                                                                                                                                                                                                                                                        | scaffold_4_mRNA_2212.1           | C_unshiu_00130_mRNA_50.1     | -                               |
| GF0022038 | 1                             | 1                         | 0                            | F-box protein interaction domain protein (2)                                                                             | protein binding [GO:0005515 molecular_function] (2)                                                                                                                                                                                                                                                                                                                                                       | F-box associated domain, type 1 [IPRO06527] (2); F-box domain [IPRO01810] (2); Quinoprotein amine dehydrogenase, beta chain-like [IPRO11044] (1)                                                                                                                                       | scaffold_4_mRNA_2209.1           | C_unshiu_00130_mRNA_52.1     | -                               |
| GF0022035 | 1                             | 1                         | 0                            | GroES-like zinc-binding dehydrogenase family protein isoform 3 (2)                                                       | zinc ion binding [GO:0008270 molecular_function] (2); oxidation-reduction process [GO:0055114 biological_process] (2); oxidoreductase activity [GO:0016491 molecular_function] (2)                                                                                                                                                                                                                        | GroES-like [IPRO11032] (2); Alcohol dehydrogenase, zinc-type, conserved site [IPRO02328] (2); Alcohol dehydrogenase, N-terminal [IPRO13154] (2); NAD(P)+binding domain [IPRO10400] (2); Alcohol dehydrogenase superfamily, zinc-type [IPRO02085] (1)                                   | scaffold_4_mRNA_2191.1           | C_unshiu_00209_mRNA_37.1     | -                               |
| GF0022033 | 1                             | 1                         | 0                            | Ferritin (2)                                                                                                             | ferric iron binding [GO:0008199 molecular_function] (2); cellular iron ion homeostasis [GO:0006879 biological_process] (2); iron ion transport [GO:0006826 biological_process] (2)                                                                                                                                                                                                                        | Ferritin [IPRO01519] (2); Ferritin/DPS protein domain [IPRO08331] (2); Ferritin, conserved site [IPRO14034] (2); Ferritin-like superfamily [IPRO09793] (2); Ferritin-related [IPRO12347] (2); Ferritin-like diiron domain [IPRO09040] (1); Ferritin-like diiron domain [IPRO09040] (1) | scaffold_4_mRNA_218.1            | C_unshiu_00012_mRNA_97.1     | -                               |
| GF0022032 | 1                             | 1                         | 0                            | Multiple inositol polyphosphate phosphatase 1 (2)                                                                        | acid phosphatase activity [GO:0003993 molecular_function] (2); phosphatase activity [GO:0016791 molecular_function] (2)                                                                                                                                                                                                                                                                                   | Histidine phosphatase superfamily, clade-2 [IPRO00560] (2); Histidine acid phosphatase, eukaryotic [IPRO16274] (2); Histidine phosphatase superfamily [IPRO29033] (2)                                                                                                                  | scaffold_4_mRNA_217.1            | C_unshiu_00012_mRNA_96.1     | -                               |
| GF0022031 | 1                             | 1                         | 0                            | Cytochrome P450, family 87, subfamily A, polypeptide 6, putative (2)                                                     | oxidoreductase activity, acting on paired donors, with incorporation or reduction of molecular oxygen [GO:0016705 molecular_function] (2); oxidation-reduction process [GO:0055114 biological_process] (2); heme binding [GO:0020037 molecular_function] (2); iron ion binding [GO:0005506 molecular_function] (2)                                                                                        | Cytochrome P450 [IPRO01128] (2); Cytochrome P450, conserved site [IPRO17972] (2); Cytochrome P450, E-class, group 1 [IPRO02401] (2)                                                                                                                                                    | scaffold_4_mRNA_2158.1           | C_unshiu_00020_mRNA_33.1     | -                               |
| GF0022030 | 1                             | 1                         | 0                            | Cytochrome P450, family 87, subfamily A, polypeptide 6, putative (2)                                                     | oxidoreductase activity, acting on paired donors, with incorporation or reduction of molecular oxygen [GO:0016705 molecular_function] (2)                                                                                                                                                                                                                                                                 | Cytochrome P450, E-class, group 1 [IPRO02401] (2); Cytochrome P450, conserved site [IPRO17972] (2); Cytochrome P450 [IPRO01128] (2)                                                                                                                                                    | scaffold_4_mRNA_2156.1           | C_unshiu_00020_mRNA_31.1     | -                               |
| GF0022029 | 1                             | 1                         | 0                            | Cytochrome P450, family 87, subfamily A, polypeptide 6, putative (2)                                                     | oxidoreductase activity, acting on paired donors, with incorporation or reduction of molecular oxygen [GO:0016705 molecular_function] (2); oxidation-reduction process [GO:0055114 biological_process] (2); iron ion binding [GO:0005506 molecular_function] (2); heme binding [GO:0020037 molecular_function] (2)                                                                                        | Cytochrome P450 [IPRO01128] (2); Cytochrome P450, conserved site [IPRO17972] (2); Cytochrome P450, E-class, group 1 [IPRO02401] (2)                                                                                                                                                    | scaffold_4_mRNA_2155.1           | C_unshiu_00020_mRNA_30.1     | -                               |
| GF0022026 | 1                             | 1                         | 0                            | Putative membrane lipoprotein (2)                                                                                        | catalytic activity [GO:0003824 molecular_function] (2); metabolic process [GO:0008152 biological_process] (2); hydrolyase activity, acting on ester bonds [GO:0016788 molecular_function] (2)                                                                                                                                                                                                             | Phosphoesterase [IPRO07312] (2); Alkaline phosphatase-like, alpha/beta alpha [IPRO17849] (1); Alkaline-phosphatase-like, core domain [IPRO17850] (1)                                                                                                                                   | scaffold_4_mRNA_2139.1           | C_unshiu_00020_mRNA_22.1     | -                               |
| GF0022025 | 1                             | 1                         | 0                            | Phospholipase C 3 (2)                                                                                                    |                                                                                                                                                                                                                                                                                                                                                                                                           |                                                                                                                                                                                                                                                                                        | scaffold_4_mRNA_2135.1           | C_unshiu_00020_mRNA_19.1     | -                               |
| GF0022024 | 1                             | 1                         | 0                            | Peptide-N4-(N-acetyl-beta-glucosaminyl)asparagine amidase A (2)                                                          |                                                                                                                                                                                                                                                                                                                                                                                                           | Peptide-N4-(N-acetyl-beta-glucosaminyl)asparagine amidase A [IPRO21102] (2)                                                                                                                                                                                                            | scaffold_4_mRNA_213.1            | C_unshiu_00012_mRNA_93.1     | -                               |
| GF0022023 | 1                             | 1                         | 0                            | Hypothetical protein (2)                                                                                                 |                                                                                                                                                                                                                                                                                                                                                                                                           |                                                                                                                                                                                                                                                                                        | scaffold_4_mRNA_2128.1           | C_unshiu_00004_mRNA_24.1     | -                               |
| GF0022021 | 1                             | 1                         | 0                            | Ankyrin repeat RF-like protein, putative (2)                                                                             | protein binding [GO:0005515 molecular_function] (2)                                                                                                                                                                                                                                                                                                                                                       | Ankyrin repeat [IPRO02110] (2); Major sperm protein (MSP) domain [IPRO00535] (2); PapD-like [IPRO08962] (2); Ankyrin repeat-containing domain [IPRO20653] (2); Immunoglobulin-like fold [IPRO13783] (1)                                                                                | scaffold_4_mRNA_212.1            | C_unshiu_00012_mRNA_92.1     | -                               |
| GF0022020 | 1                             | 1                         | 0                            | Hypothetical protein (2)                                                                                                 | aspartic-type endopeptidase activity [GO:0004190 molecular_function] (2); proteolysis [GO:0006508 biological_process] (2)                                                                                                                                                                                                                                                                                 | Peptidase family A1 domain [IPRO33121] (2); Aspartic peptidase domain [IPRO21109] (2); Aspartic peptidase A1 family [IPRO01461] (2); Xylanase inhibitor, N-terminal [IPRO32861] (1)                                                                                                    | scaffold_4_mRNA_2109.1           | C_unshiu_00020_mRNA_7.1      | -                               |
| GF0022017 | 1                             | 1                         | 0                            | Hypothetical protein (2)                                                                                                 | transmembrane transport [GO:0055085 biological_process] (2); drug transmembrane transporter activity [GO:0015238 molecular_function] (2); antiporter activity [GO:0015297 molecular_function] (2); membrane [GO:0016020 cellular_component] (2); drug transmembrane transport [GO:0006855 biological_process] (2)                                                                                         | ELMO domain [IPRO06816] (2)                                                                                                                                                                                                                                                            | scaffold_4_mRNA_2077.1           | C_unshiu_01238_mRNA_6.1      | -                               |
| GF0022016 | 1                             | 1                         | 0                            | MatE family protein, expressed (2)                                                                                       |                                                                                                                                                                                                                                                                                                                                                                                                           | Multi antimicrobial extrusion protein [IPRO02528] (2)                                                                                                                                                                                                                                  | scaffold_4_mRNA_2074.1           | C_unshiu_00700_mRNA_18.1     | -                               |
| GF0022015 | 1                             | 1                         | 0                            | ELMO domain-containing protein 2 (2)                                                                                     |                                                                                                                                                                                                                                                                                                                                                                                                           | ELMO domain [IPRO06816] (2)                                                                                                                                                                                                                                                            | scaffold_4_mRNA_2071.1           | C_unshiu_00700_mRNA_13.1     | -                               |
| GF0022014 | 1                             | 1                         | 0                            | Pollen Ole e 1 allergen and extensin family protein (2)                                                                  |                                                                                                                                                                                                                                                                                                                                                                                                           |                                                                                                                                                                                                                                                                                        | scaffold_4_mRNA_207.1            | C_unshiu_00012_mRNA_87.1     | -                               |
| GF0022013 | 1                             | 1                         | 0                            | Hypothetical protein (2)                                                                                                 | mRNA splicing, via spliceosome [GO:0000398 biological_process] (2); nucleic acid binding [GO:0003676 molecular_function] (2); RNA binding [GO:0007323 molecular_function] (2); U2AF [GO:0089701 cellular_component] (2); nucleotide binding [GO:0000166 molecular_function] (1)                                                                                                                           | RNA recognition motif domain, eukaryote [IPRO03954] (2); U2 auxiliary factor small subunit [IPRO09145] (2); RNA recognition motif domain [IPRO00504] (2); Nucleotide-binding alpha-beta phi domain [IPRO12677] (1)                                                                     | scaffold_4_mRNA_2066.1           | C_unshiu_00700_mRNA_9.1      | -                               |
| GF0022011 | 1                             | 1                         | 0                            | NAC domain-containing protein 67 (1); NAC protein 4 (1)                                                                  | regulation of transcription, DNA-templated [GO:0006355 biological_process] (2); DNA binding [GO:0003677 molecular_function] (2)                                                                                                                                                                                                                                                                           | NAC domain [IPRO03441] (2)                                                                                                                                                                                                                                                             | scaffold_4_mRNA_2061.1           | C_unshiu_00700_mRNA_4.1      | -                               |
| GF0022010 | 1                             | 1                         | 0                            | Hypothetical protein (2)                                                                                                 |                                                                                                                                                                                                                                                                                                                                                                                                           |                                                                                                                                                                                                                                                                                        | scaffold_4_mRNA_2060.1           | C_unshiu_00700_mRNA_3.1      | -                               |
| GF0022009 | 1                             | 1                         | 0                            | GDSL esterase/lipase LTL1 (2)                                                                                            | hydrolase activity, acting on ester bonds [GO:0016788 molecular_function] (2)                                                                                                                                                                                                                                                                                                                             | GDSL lipase/esterase [IPRO01087] (2); SGNH hydrolase-type esterase domain [IPRO13830] (2)                                                                                                                                                                                              | scaffold_4_mRNA_2046.1           | C_unshiu_00250_mRNA_41.1     | -                               |
| GF0022008 | 1                             | 1                         | 0                            | Hypothetical protein (2)                                                                                                 |                                                                                                                                                                                                                                                                                                                                                                                                           | Alpha/Beta hydrolase fold [IPRO29058] (2)                                                                                                                                                                                                                                              | scaffold_4_mRNA_2039.1           | C_unshiu_00250_mRNA_33.1     | -                               |
| GF0022006 | 1                             | 1                         | 0                            | Hypothetical protein (2)                                                                                                 |                                                                                                                                                                                                                                                                                                                                                                                                           | Domain of unknown function DUF4283 [IPRO25558] (2)                                                                                                                                                                                                                                     | scaffold_4_mRNA_2024.1           | C_unshiu_00250_mRNA_13.1     | -                               |
| GF0022005 | 1                             | 1                         | 0                            | Hypothetical protein (2)                                                                                                 |                                                                                                                                                                                                                                                                                                                                                                                                           | Zinc knuckle CX2CX4HX4C [IPRO25836] (2)                                                                                                                                                                                                                                                | scaffold_4_mRNA_2023.1           | C_unshiu_00250_mRNA_12.1     | -                               |
| GF0022004 | 1                             | 1                         | 0                            | Hypothetical protein (2)                                                                                                 | cysteine-type peptidase activity [GO:0008234 molecular_function] (2); proteolysis [GO:0006508 biological_process] (2)                                                                                                                                                                                                                                                                                     | Upl1 protease family, C-terminal catalytic domain [IPRO03653] (2)                                                                                                                                                                                                                      | scaffold_4_mRNA_2019.1           | C_unshiu_00250_mRNA_10.1     | -                               |
| GF0022003 | 1                             | 1                         | 0                            | Hypothetical protein (2)                                                                                                 |                                                                                                                                                                                                                                                                                                                                                                                                           |                                                                                                                                                                                                                                                                                        | scaffold_4_mRNA_2017.1           | C_unshiu_00250_mRNA_8.1      | -                               |
| GF0022002 | 1                             | 1                         | 0                            | Hypothetical protein (2)                                                                                                 | transporter activity [GO:0005215 molecular_function] (1); membrane [GO:0016020 cellular_component] (1); transport [GO:0006810 biological_process] (1)                                                                                                                                                                                                                                                     | Proton-dependent oligopeptide transporter family [IPRO00109] (1)                                                                                                                                                                                                                       | scaffold_4_mRNA_1992.1           | C_unshiu_00086_mRNA_28.1     | -                               |
| GF0022001 | 1                             | 1                         | 0                            | Tetrapeptide repeat-like superfamily protein, putative (2)                                                               |                                                                                                                                                                                                                                                                                                                                                                                                           | Pentapeptide repeat [IPRO02885] (2)                                                                                                                                                                                                                                                    | scaffold_4_mRNA_199.1            | C_unshiu_00012_mRNA_78.1     | -                               |
| GF0022000 | 1                             | 1                         | 0                            | Hypothetical protein (2)                                                                                                 |                                                                                                                                                                                                                                                                                                                                                                                                           |                                                                                                                                                                                                                                                                                        | scaffold_4_mRNA_1984.1           | C_unshiu_00086_mRNA_20.1     | -                               |
| GF0021999 | 1                             | 1                         | 0                            | Hypothetical protein (2)                                                                                                 | nucleic acid binding [GO:0003676 molecular_function] (1)                                                                                                                                                                                                                                                                                                                                                  | Ribonuclease H-like domain [IPRO12337] (1)                                                                                                                                                                                                                                             | scaffold_4_mRNA_1982.1           | C_unshiu_00086_mRNA_18.1     | -                               |
| GF0021998 | 1                             | 1                         | 0                            | Hypothetical protein (2)                                                                                                 |                                                                                                                                                                                                                                                                                                                                                                                                           |                                                                                                                                                                                                                                                                                        | scaffold_4_mRNA_198.1            | C_unshiu_00012_mRNA_77.1     | -                               |
| GF0021997 | 1                             | 1                         | 0                            | Hypothetical protein (2)                                                                                                 |                                                                                                                                                                                                                                                                                                                                                                                                           | Transposase, MuDR, plant [IPRO04332] (2)                                                                                                                                                                                                                                               | scaffold_4_mRNA_1974.1           | C_unshiu_00086_mRNA_10.1     | -                               |
| GF0021996 | 1                             | 1                         | 0                            | Hypothetical protein (2)                                                                                                 |                                                                                                                                                                                                                                                                                                                                                                                                           |                                                                                                                                                                                                                                                                                        | scaffold_4_mRNA_1953.1           | C_unshiu_01260_mRNA_10.1     | -                               |





| ID        | Num. in <i>C. clementinae</i> | Num. in <i>C. australis</i> | Num. in <i>P. trifoliata</i> | Note                                                                                                                                     | GO                                                                                                                                                                                                                                                                                                                | InterPro                                                                                                                                                                                                                                                                                                                                                                                                                                                                                                                                                                                                               | Members in <i>C. clementinae</i> | Members in <i>C. australis</i> | Members in <i>P. trifoliata</i> |
|-----------|-------------------------------|-----------------------------|------------------------------|------------------------------------------------------------------------------------------------------------------------------------------|-------------------------------------------------------------------------------------------------------------------------------------------------------------------------------------------------------------------------------------------------------------------------------------------------------------------|------------------------------------------------------------------------------------------------------------------------------------------------------------------------------------------------------------------------------------------------------------------------------------------------------------------------------------------------------------------------------------------------------------------------------------------------------------------------------------------------------------------------------------------------------------------------------------------------------------------------|----------------------------------|--------------------------------|---------------------------------|
| GF0021834 | 1                             | 1                           | 0                            | Hypothetical protein (2)                                                                                                                 | ATP binding [GO:0005524 molecular_function] (2); ATPase activity [GO:0016887 molecular_function] (2); nucleoside [GO:0016020 cellular_component] (2)                                                                                                                                                              | AAA+ ATPase domain [IPR001593] (2); ABC transporter-like [IPR00439] (2); ABC-2 type transporter [IPR013525] (2); ABC-transporter extracellular N-terminal domain [IPR029481] (2); P-loop containing nucleoside triphosphate hydrolase [IPR027417] (2); Plant PDR ABC transporter associated [IPR013581] (2)                                                                                                                                                                                                                                                                                                            | scaffold_4_mRNA_1171.1           | C.unshiu_00532_mRNA_13.1       | -                               |
| GF0021833 | 1                             | 1                           | 0                            | Hypothetical protein (2)                                                                                                                 |                                                                                                                                                                                                                                                                                                                   |                                                                                                                                                                                                                                                                                                                                                                                                                                                                                                                                                                                                                        | scaffold_4_mRNA_1170.1           | C.unshiu_00532_mRNA_12.1       | -                               |
| GF0021832 | 1                             | 1                           | 0                            | Hypothetical protein (2)                                                                                                                 |                                                                                                                                                                                                                                                                                                                   | MULE transposase domain [IPR018289] (1)                                                                                                                                                                                                                                                                                                                                                                                                                                                                                                                                                                                | scaffold_4_mRNA_1167.1           | C.unshiu_00532_mRNA_9.1        | -                               |
| GF0021831 | 1                             | 1                           | 0                            | Protein kinase G11A (2)                                                                                                                  | ATP binding [GO:0005524 molecular_function] (2); protein kinase activity [GO:0004672 molecular_function] (2); protein serine/threonine kinase activity [GO:0004674 molecular_function] (2); protein phosphorylation [GO:0006468 biological_process] (2)                                                           | Protein kinase domain [IPR000719] (2); Protein kinase-like domain [IPR011009] (2); Serine/threonine-protein kinase, active site [IPR008271] (2); AGC-kinase C-terminal [IPR009061] (2); Serine/threonine/dual specificity protein kinase, catalytic domain [IPR02290] (1)                                                                                                                                                                                                                                                                                                                                              | scaffold_4_mRNA_1163.1           | C.unshiu_00532_mRNA_5.1        | -                               |
| GF0021830 | 1                             | 1                           | 0                            | FGF: Transposon-encoded proteins with TYA reverse transcriptase, integrate domains in various combinations (1); Hypothetical protein (1) | zinc ion binding [GO:0008270 molecular_function] (2); nucleic acid binding [GO:0003676 molecular_function] (2)                                                                                                                                                                                                    | Zinc finger, CCHC-type [IPR001878] (2); Reverse transcriptase, RNA-dependent DNA polymerase [IPR013103] (1)                                                                                                                                                                                                                                                                                                                                                                                                                                                                                                            | scaffold_4_mRNA_1160.1           | C.unshiu_00532_mRNA_2.1        | -                               |
| GF0021829 | 1                             | 1                           | 0                            | Hypothetical protein (2)                                                                                                                 |                                                                                                                                                                                                                                                                                                                   |                                                                                                                                                                                                                                                                                                                                                                                                                                                                                                                                                                                                                        | scaffold_4_mRNA_1154.1           | C.unshiu_00440_mRNA_19.1       | -                               |
| GF0021828 | 1                             | 1                           | 0                            | Hypothetical protein (2)                                                                                                                 |                                                                                                                                                                                                                                                                                                                   |                                                                                                                                                                                                                                                                                                                                                                                                                                                                                                                                                                                                                        | scaffold_4_mRNA_1153.1           | C.unshiu_00440_mRNA_18.1       | -                               |
| GF0021827 | 1                             | 1                           | 0                            | Hypothetical protein (2)                                                                                                                 |                                                                                                                                                                                                                                                                                                                   |                                                                                                                                                                                                                                                                                                                                                                                                                                                                                                                                                                                                                        | scaffold_4_mRNA_1152.1           | C.unshiu_00440_mRNA_17.1       | -                               |
| GF0021826 | 1                             | 1                           | 0                            | Hypothetical protein (2)                                                                                                                 | nucleic acid binding [GO:0003676 molecular_function] (2)                                                                                                                                                                                                                                                          | Ribonuclease H-like domain [IPR012377] (2)                                                                                                                                                                                                                                                                                                                                                                                                                                                                                                                                                                             | scaffold_4_mRNA_1151.1           | C.unshiu_00440_mRNA_16.1       | -                               |
| GF0021825 | 1                             | 1                           | 0                            | Hypothetical protein (2)                                                                                                                 | DNA binding [GO:0003677 molecular_function] (2)                                                                                                                                                                                                                                                                   | hA-T like transposase, RNase-H fold [IPR025525] (2)                                                                                                                                                                                                                                                                                                                                                                                                                                                                                                                                                                    | scaffold_4_mRNA_1150.1           | C.unshiu_00440_mRNA_15.1       | -                               |
| GF0021824 | 1                             | 1                           | 0                            | Hypothetical protein (2)                                                                                                                 |                                                                                                                                                                                                                                                                                                                   |                                                                                                                                                                                                                                                                                                                                                                                                                                                                                                                                                                                                                        | scaffold_4_mRNA_1149.1           | C.unshiu_00440_mRNA_14.1       | -                               |
| GF0021823 | 1                             | 1                           | 0                            | Calmodulin-binding family protein isoform 1 (2)                                                                                          |                                                                                                                                                                                                                                                                                                                   |                                                                                                                                                                                                                                                                                                                                                                                                                                                                                                                                                                                                                        | scaffold_4_mRNA_1148.1           | C.unshiu_00440_mRNA_13.1       | -                               |
| GF0021822 | 1                             | 1                           | 0                            | Unspecific monooxygenase (2)                                                                                                             | heme binding [GO:0020037 molecular_function] (2); iron ion binding [GO:0005506 molecular_function] (2); oxidoreductase activity, acting on paired donors, with incorporation or reduction of molecular oxygen [GO:0016705 molecular_function] (2); oxidation-reduction process [GO:005114 biological_process] (2) | Cytochrome P450, E-class, group 1 [IPR02401] (2); Cytochrome P450 [IPR001128] (2)                                                                                                                                                                                                                                                                                                                                                                                                                                                                                                                                      | scaffold_4_mRNA_1142.1           | C.unshiu_00440_mRNA_5.1        | -                               |
| GF0021821 | 1                             | 1                           | 0                            | Putative retroelement pol polyprotein (1); Hypothetical protein (1)                                                                      |                                                                                                                                                                                                                                                                                                                   |                                                                                                                                                                                                                                                                                                                                                                                                                                                                                                                                                                                                                        | scaffold_4_mRNA_1141.1           | C.unshiu_00440_mRNA_4.1        | -                               |
| GF0021820 | 1                             | 1                           | 0                            | Hypothetical protein (2)                                                                                                                 | methyltransferase activity [GO:0008168 molecular_function] (2)                                                                                                                                                                                                                                                    | Putative S-adenosyl-L-methionine-dependent methyltransferase [IPR004159] (2); S-adenosyl-L-methionine-dependent methyltransferase [IPR029063] (2)                                                                                                                                                                                                                                                                                                                                                                                                                                                                      | scaffold_4_mRNA_1139.1           | C.unshiu_00440_mRNA_2.1        | -                               |
| GF0021819 | 1                             | 1                           | 0                            | Hypothetical protein (2)                                                                                                                 |                                                                                                                                                                                                                                                                                                                   |                                                                                                                                                                                                                                                                                                                                                                                                                                                                                                                                                                                                                        | scaffold_4_mRNA_1138.1           | C.unshiu_00440_mRNA_1.1        | -                               |
| GF0021818 | 1                             | 1                           | 0                            | Hypothetical protein (2)                                                                                                                 | DNA binding [GO:0003677 molecular_function] (2); regulation of transcription, DNA-templated [GO:000655 biological_process] (2); transcription factor activity, sequence-specific; DNA binding [GO:0003700 molecular_function] (2)                                                                                 | AP2/ERF domain [IPR001471] (2); DNA-binding domain [IPR018177] (2)                                                                                                                                                                                                                                                                                                                                                                                                                                                                                                                                                     | scaffold_4_mRNA_1136.1           | C.unshiu_00512_mRNA_19.1       | -                               |
| GF0021817 | 1                             | 1                           | 0                            | Hypothetical protein (2)                                                                                                                 |                                                                                                                                                                                                                                                                                                                   |                                                                                                                                                                                                                                                                                                                                                                                                                                                                                                                                                                                                                        | scaffold_4_mRNA_1124.1           | C.unshiu_00101_mRNA_2.1        | -                               |
| GF0021816 | 1                             | 1                           | 0                            | Hypothetical protein (2)                                                                                                                 |                                                                                                                                                                                                                                                                                                                   |                                                                                                                                                                                                                                                                                                                                                                                                                                                                                                                                                                                                                        | scaffold_4_mRNA_1122.1           | C.unshiu_01133_mRNA_6.1        | -                               |
| GF0021815 | 1                             | 1                           | 0                            | RNA-directed DNA polymerase (2)                                                                                                          | DNA integration [GO:0015074 biological_process] (2); nucleic acid binding [GO:0003676 molecular_function] (2)                                                                                                                                                                                                     | Ribonuclease H-like domain [IPR012337] (2); Integrase, catalytic core [IPR001584] (2)                                                                                                                                                                                                                                                                                                                                                                                                                                                                                                                                  | scaffold_4_mRNA_1118.1           | C.unshiu_00929_mRNA_2.1        | -                               |
| GF0021814 | 1                             | 1                           | 0                            | Hypothetical protein (2)                                                                                                                 | nucleic acid binding [GO:0003676 molecular_function] (2); RNA-DNA hybrid ribonuclease activity [GO:0004523 molecular_function] (2)                                                                                                                                                                                | Ribonuclease H-like domain [IPR012337] (2); Ribonuclease H domain [IPR002156] (2)                                                                                                                                                                                                                                                                                                                                                                                                                                                                                                                                      | scaffold_4_mRNA_1117.1           | C.unshiu_00929_mRNA_3.1        | -                               |
| GF0021813 | 1                             | 1                           | 0                            | Hypothetical protein (2)                                                                                                                 |                                                                                                                                                                                                                                                                                                                   |                                                                                                                                                                                                                                                                                                                                                                                                                                                                                                                                                                                                                        | scaffold_4_mRNA_1116.1           | C.unshiu_00929_mRNA_4.1        | -                               |
| GF0021812 | 1                             | 1                           | 0                            | LRR receptor-like kinase family protein (2)                                                                                              | protein binding [GO:0005515 molecular_function] (2); protein kinase activity [GO:0004672 molecular_function] (2); protein phosphorylation [GO:0006468 biological_process] (2); ATP binding [GO:0005524 molecular_function] (2)                                                                                    | Protein kinase domain [IPR000719] (2); Leucine-rich repeat, typical subtype [IPR003591] (2); Leucine-rich repeat domain, L domain-like [IPR032675] (2); Protein kinase-like domain [IPR011009] (2); Protein kinase, ATP binding site [IPR017441] (2); Serine/threonine-protein kinase, active site [IPR008271] (2); Leucine-rich repeat-containing N-terminal, plant-type [IPR013210] (2); Retrotransposon gag domain [IPR005162] (2); Leucine-rich repeat [IPR01611] (2); Conserved A-like lectin glucanase domain [IPR013320] (1); Serine/threonine/dual specificity protein kinase, catalytic domain [IPR02290] (1) | scaffold_4_mRNA_1113.1           | C.unshiu_00929_mRNA_6.1        | -                               |
| GF0021811 | 1                             | 1                           | 0                            | Hypothetical protein (2)                                                                                                                 |                                                                                                                                                                                                                                                                                                                   |                                                                                                                                                                                                                                                                                                                                                                                                                                                                                                                                                                                                                        | scaffold_4_mRNA_1102.1           | C.unshiu_00922_mRNA_13.1       | -                               |
| GF0021810 | 1                             | 1                           | 0                            | Hypothetical protein (2)                                                                                                                 |                                                                                                                                                                                                                                                                                                                   |                                                                                                                                                                                                                                                                                                                                                                                                                                                                                                                                                                                                                        | scaffold_4_mRNA_110.1            | C.unshiu_00202_mRNA_32.1       | -                               |
| GF0021809 | 1                             | 1                           | 0                            | Hypothetical protein (2)                                                                                                                 |                                                                                                                                                                                                                                                                                                                   |                                                                                                                                                                                                                                                                                                                                                                                                                                                                                                                                                                                                                        | scaffold_4_mRNA_1098.1           | C.unshiu_00725_mRNA_4.1        | -                               |
| GF0021808 | 1                             | 1                           | 0                            | Putative non-LTR retroelement reverse transcriptase (2)                                                                                  | nucleic acid binding [GO:0003676 molecular_function] (2); RNA-DNA hybrid ribonuclease activity [GO:0004523 molecular_function] (2)                                                                                                                                                                                | Reverse transcriptase domain [IPR000477] (2); Ribonuclease H-like domain [IPR012337] (2); Reverse transcriptase zinc-binding domain [IPR026900] (2); Ribonuclease H domain [IPR002156] (2); Endonuclease/exonuclease/phosphatase [IPR005155] (2)                                                                                                                                                                                                                                                                                                                                                                       | scaffold_4_mRNA_1097.1           | C.unshiu_00725_mRNA_5.1        | -                               |
| GF0021807 | 1                             | 1                           | 0                            | Hypothetical protein (2)                                                                                                                 | protein binding [GO:0005515 molecular_function] (1)                                                                                                                                                                                                                                                               | Leucine-rich repeat domain, L domain-like [IPR032675] (2); Leucine-rich repeat [IPR01611] (1); Protein kinase-like domain [IPR011009] (1)                                                                                                                                                                                                                                                                                                                                                                                                                                                                              | scaffold_4_mRNA_1096.1           | C.unshiu_00725_mRNA_8.1        | -                               |
| GF0021806 | 1                             | 1                           | 0                            | Hypothetical protein (2)                                                                                                                 |                                                                                                                                                                                                                                                                                                                   |                                                                                                                                                                                                                                                                                                                                                                                                                                                                                                                                                                                                                        | scaffold_4_mRNA_109.1            | C.unshiu_00202_mRNA_31.1       | -                               |
| GF0021805 | 1                             | 1                           | 0                            | Hypothetical protein (2)                                                                                                                 |                                                                                                                                                                                                                                                                                                                   |                                                                                                                                                                                                                                                                                                                                                                                                                                                                                                                                                                                                                        | scaffold_4_mRNA_1084.1           | C.unshiu_00111_mRNA_2.1        | -                               |
| GF0021804 | 1                             | 1                           | 0                            | Hypothetical protein (2)                                                                                                                 |                                                                                                                                                                                                                                                                                                                   |                                                                                                                                                                                                                                                                                                                                                                                                                                                                                                                                                                                                                        | scaffold_4_mRNA_1083.1           | C.unshiu_00111_mRNA_3.1        | -                               |
| GF0021803 | 1                             | 1                           | 0                            | Hypothetical protein (2)                                                                                                                 |                                                                                                                                                                                                                                                                                                                   |                                                                                                                                                                                                                                                                                                                                                                                                                                                                                                                                                                                                                        | scaffold_4_mRNA_1077.1           | C.unshiu_00111_mRNA_9.1        | -                               |
| GF0021802 | 1                             | 1                           | 0                            | Hypothetical protein (2)                                                                                                                 |                                                                                                                                                                                                                                                                                                                   |                                                                                                                                                                                                                                                                                                                                                                                                                                                                                                                                                                                                                        | scaffold_4_mRNA_1074.1           | C.unshiu_00111_mRNA_12.1       | -                               |
| GF0021801 | 1                             | 1                           | 0                            | Hypothetical protein (2)                                                                                                                 |                                                                                                                                                                                                                                                                                                                   |                                                                                                                                                                                                                                                                                                                                                                                                                                                                                                                                                                                                                        | scaffold_4_mRNA_1067.1           | C.unshiu_00111_mRNA_19.1       | -                               |
| GF0021800 | 1                             | 1                           | 0                            | Hypothetical protein (2)                                                                                                                 |                                                                                                                                                                                                                                                                                                                   |                                                                                                                                                                                                                                                                                                                                                                                                                                                                                                                                                                                                                        | scaffold_4_mRNA_1066.1           | C.unshiu_00111_mRNA_20.1       | -                               |
| GF0021799 | 1                             | 1                           | 0                            | WD repeat-containing protein 5 (2)                                                                                                       | protein binding [GO:0005515 molecular_function] (2)                                                                                                                                                                                                                                                               | WD40 repeat [IPR001680] (2); WD40-repeat-containing domain [IPR017986] (2); WD40/YVTN repeat-like-containing domain [IPR015943] (2)                                                                                                                                                                                                                                                                                                                                                                                                                                                                                    | scaffold_4_mRNA_1064.1           | C.unshiu_00111_mRNA_22.1       | -                               |
| GF0021798 | 1                             | 1                           | 0                            | PIF-like orf1 (1); Hypothetical protein (1)                                                                                              |                                                                                                                                                                                                                                                                                                                   |                                                                                                                                                                                                                                                                                                                                                                                                                                                                                                                                                                                                                        | scaffold_4_mRNA_1062.1           | C.unshiu_00111_mRNA_23.1       | -                               |
| GF0021797 | 1                             | 1                           | 0                            | Hypothetical protein (2)                                                                                                                 |                                                                                                                                                                                                                                                                                                                   |                                                                                                                                                                                                                                                                                                                                                                                                                                                                                                                                                                                                                        | scaffold_4_mRNA_1060.1           | C.unshiu_00111_mRNA_27.1       | -                               |
| GF0021796 | 1                             | 1                           | 0                            | Hypothetical protein (2)                                                                                                                 |                                                                                                                                                                                                                                                                                                                   |                                                                                                                                                                                                                                                                                                                                                                                                                                                                                                                                                                                                                        | scaffold_4_mRNA_1059.1           | C.unshiu_00111_mRNA_28.1       | -                               |
| GF0021795 | 1                             | 1                           | 0                            | FBD, F-box and leucine rich repeat domain-containing protein (2)                                                                         | protein binding [GO:0005515 molecular_function] (2)                                                                                                                                                                                                                                                               | FBD domain [IPR006566] (2); Leucine-rich repeat domain, L domain-like [IPR032675] (2); F-box domain [IPR01810] (2)                                                                                                                                                                                                                                                                                                                                                                                                                                                                                                     | scaffold_4_mRNA_1058.1           | C.unshiu_00111_mRNA_29.1       | -                               |
| GF0021794 | 1                             | 1                           | 0                            | Hypothetical protein (2)                                                                                                                 |                                                                                                                                                                                                                                                                                                                   |                                                                                                                                                                                                                                                                                                                                                                                                                                                                                                                                                                                                                        | scaffold_4_mRNA_1055.1           | C.unshiu_00111_mRNA_33.1       | -                               |
| GF0021793 | 1                             | 1                           | 0                            | Hypothetical protein (2)                                                                                                                 |                                                                                                                                                                                                                                                                                                                   |                                                                                                                                                                                                                                                                                                                                                                                                                                                                                                                                                                                                                        | scaffold_4_mRNA_1054.1           | C.unshiu_00111_mRNA_34.1       | -                               |
| GF0021792 | 1                             | 1                           | 0                            | Putative inorganic polyphosphate/ATP-nad kinase (2)                                                                                      |                                                                                                                                                                                                                                                                                                                   |                                                                                                                                                                                                                                                                                                                                                                                                                                                                                                                                                                                                                        | scaffold_4_mRNA_1043.1           | C.unshiu_00932_mRNA_4.1        | -                               |
| GF0021791 | 1                             | 1                           | 0                            | Nepenthesin II (2)                                                                                                                       | aspartic-type endopeptidase activity [GO:0004190 molecular_function] (2); electron carrier activity [GO:0009055 molecular_function] (2); proteolysis [GO:0006508 biological_process] (2)                                                                                                                          | Aspartic peptidase, active site [IPR001909] (2); Aspartic peptidase A1 family [IPR001461] (2); Xylanase inhibitor, C-terminal [IPR032799] (2); Xylanase inhibitor, N-terminal [IPR032811] (2); Cupredoxin [IPR008972] (2); Peptidase family A1 domain [IPR033121] (2); Phytocyanin domain [IPR003245] (2); Aspartic peptidase domain [IPR021109] (2); Pepsin-like domain, plant [IPR034161] (1)                                                                                                                                                                                                                        | scaffold_4_mRNA_1039.1           | C.unshiu_00932_mRNA_9.1        | -                               |
| GF0021790 | 1                             | 1                           | 0                            | Hypothetical protein (2)                                                                                                                 |                                                                                                                                                                                                                                                                                                                   |                                                                                                                                                                                                                                                                                                                                                                                                                                                                                                                                                                                                                        | scaffold_4_mRNA_1035.1           | C.unshiu_00932_mRNA_11.1       | -                               |
| GF0021789 | 1                             | 1                           | 0                            | Hypothetical protein (2)                                                                                                                 |                                                                                                                                                                                                                                                                                                                   |                                                                                                                                                                                                                                                                                                                                                                                                                                                                                                                                                                                                                        | scaffold_4_mRNA_103.1            | C.unshiu_00201_mRNA_25.1       | -                               |
| GF0021788 | 1                             | 1                           | 0                            | Hypothetical protein (2)                                                                                                                 | aspartic-type endopeptidase activity [GO:0004190 molecular_function] (2); proteolysis [GO:0006508 biological_process] (2)                                                                                                                                                                                         | Aspartic peptidase A1 family [IPR001461] (2); Xylanase inhibitor, C-terminal [IPR032799] (2); Aspartic peptidase domain [IPR021109] (2)                                                                                                                                                                                                                                                                                                                                                                                                                                                                                | scaffold_4_mRNA_1025.1           | C.unshiu_00059_mRNA_20.1       | -                               |
| GF0021787 | 1                             | 1                           | 0                            | Putative glycosyltransferase family protein 64 protein C5-like (1); Glycosyltransferase family protein 64 protein C5 (1)                 | glycosaminoglycan biosynthetic process [GO:0006024 biological_process] (2); heparan sulfate proteoglycan biosynthetic process [GO:0010102 biological_process] (2); integral component of membrane [GO:0016021 cellular_component] (2)                                                                             | Nucleotide-diphospho-sugar transferases [IPR029044] (2); Glycosyl hydrolase, five-bladed beta-propeller domain [IPR023286] (2); Exostosin, C-terminal [IPR015338] (2)                                                                                                                                                                                                                                                                                                                                                                                                                                                  | scaffold_4_mRNA_1021.1           | C.unshiu_00059_mRNA_23.1       | -                               |
| GF0021786 | 1                             | 1                           | 0                            | Monosaccharide transport protein (2)                                                                                                     |                                                                                                                                                                                                                                                                                                                   |                                                                                                                                                                                                                                                                                                                                                                                                                                                                                                                                                                                                                        | scaffold_4_mRNA_1019.1           | C.unshiu_00059_mRNA_26.1       | -                               |
| GF0021785 | 1                             | 1                           | 0                            | Hypothetical protein (2)                                                                                                                 |                                                                                                                                                                                                                                                                                                                   |                                                                                                                                                                                                                                                                                                                                                                                                                                                                                                                                                                                                                        | scaffold_4_mRNA_1017.1           | C.unshiu_00059_mRNA_28.1       | -                               |
| GF0021784 | 1                             | 1                           | 0                            | Hypothetical protein (2)                                                                                                                 |                                                                                                                                                                                                                                                                                                                   |                                                                                                                                                                                                                                                                                                                                                                                                                                                                                                                                                                                                                        | scaffold_4_mRNA_1016.1           | C.unshiu_00059_mRNA_29.1       | -                               |

| ID        | Num. in <i>C. caryophyllata</i> | Num. in <i>C. acutata</i> | Num. in <i>P. trifoliata</i> | Note                                                                                                                         | GO                                                                                                                                                                                                                                                                                                                                           | InterPro                                                                                                                                                                                                                                                                                                                      | Members in <i>C. caryophyllata</i> | Members in <i>C. acutata</i> | Members in <i>P. trifoliata</i> |
|-----------|---------------------------------|---------------------------|------------------------------|------------------------------------------------------------------------------------------------------------------------------|----------------------------------------------------------------------------------------------------------------------------------------------------------------------------------------------------------------------------------------------------------------------------------------------------------------------------------------------|-------------------------------------------------------------------------------------------------------------------------------------------------------------------------------------------------------------------------------------------------------------------------------------------------------------------------------|------------------------------------|------------------------------|---------------------------------|
| GF0021783 | 1                               | 1                         | 0                            | Hypothetical protein (2)                                                                                                     | proteolysis [GO:0006508 biological_process] (2); serine-type peptidase activity [GO:0008236 molecular_function] (2)                                                                                                                                                                                                                          | Peptidase S28 [IPR008758] (2)                                                                                                                                                                                                                                                                                                 | scaffold_4_mRNA_1012.1             | C_unshiu_00059_mRNA_33.1     | -                               |
| GF0021781 | 1                               | 1                         | 0                            | Hypothetical protein (1); Serine carboxypeptidase S28 family protein (1)                                                     | zinc ion binding [GO:0008270 molecular_function] (2); nucleic acid binding [GO:0003676 molecular_function] (2)                                                                                                                                                                                                                               | Matrion-U1-C-like, C2H2-type zinc finger [IPR03604] (1); Zinc finger, U1-type [IPR013087] (1); Zinc finger, U1-type [IPR03604] (1); Zinc finger, C2H2-like [IPR015800] (1)                                                                                                                                                    | scaffold_4_mRNA_1000.1             | C_unshiu_01189_mRNA_6.1      | -                               |
| GF0021780 | 1                               | 1                         | 0                            | Hypothetical protein (2)                                                                                                     | helicase activity [GO:0004386 molecular_function] (2); ATP-dependent helicase activity [GO:0008026 molecular_function] (2); nucleic acid binding [GO:0003676 molecular_function] (2); ATP binding [GO:0005524 molecular_function] (2)                                                                                                        | Helicase-associated domain [IPR007502] (2); Helicase, C-terminal [IPR001650] (2); P-loop containing nucleoside triphosphate hydrolase [IPR027417] (2); Dna/RNA helicase, ATP-dependent, DEAH-box type, conserved site [IPR02484] (2); Helicase superfamily 1.2, ATP-binding domain [IPR014001] (2)                            | scaffold_3_mRNA_990.1              | C_unshiu_00199_mRNA_16.1     | -                               |
| GF0021779 | 1                               | 1                         | 0                            | Pre-miRNA-splicing factor ATP-dependent RNA helicase (2)                                                                     |                                                                                                                                                                                                                                                                                                                                              |                                                                                                                                                                                                                                                                                                                               |                                    |                              |                                 |
| GF0021778 | 1                               | 1                         | 0                            | Hypothetical protein (2)                                                                                                     |                                                                                                                                                                                                                                                                                                                                              |                                                                                                                                                                                                                                                                                                                               | scaffold_3_mRNA_988.1              | C_unshiu_00199_mRNA_19.1     | -                               |
| GF0021776 | 1                               | 1                         | 0                            | DNA-directed RNA polymerase D subunit 1-like protein (2)                                                                     |                                                                                                                                                                                                                                                                                                                                              | Protein of unknown function DUF3223 [IPR021602] (2)                                                                                                                                                                                                                                                                           | scaffold_3_mRNA_977.1              | C_unshiu_00199_mRNA_27.1     | -                               |
| GF0021770 | 1                               | 1                         | 0                            | Hypothetical protein (2)                                                                                                     |                                                                                                                                                                                                                                                                                                                                              |                                                                                                                                                                                                                                                                                                                               | scaffold_3_mRNA_930.1              | C_unshiu_00587_mRNA_2.1      | -                               |
| GF0021769 | 1                               | 1                         | 0                            | Hypothetical protein (2)                                                                                                     |                                                                                                                                                                                                                                                                                                                                              |                                                                                                                                                                                                                                                                                                                               | scaffold_3_mRNA_925.1              | C_unshiu_00345_mRNA_9.1      | -                               |
| GF0021768 | 1                               | 1                         | 0                            | Subtilisin-like serine endopeptidase 0 family protein (1); Subtilisin-like serine endopeptidase family protein, putative (1) | serine-type endopeptidase activity [GO:0004252 molecular_function] (2); proteolysis [GO:0006508 biological_process] (2)                                                                                                                                                                                                                      | Peptidase S8/S53 domain [IPR00209] (2); Peptidase S8, subtilisin-related [IPR015500] (2); Peptidase S8 propeptide/proteinase inhibitor 19 [IPR01029] (2); Peptidase S8, subtilisin, Ser-active site [IPR023828] (2); Cucumis-like catalytic domain [IPR034197] (1)                                                            | scaffold_3_mRNA_908.1              | C_unshiu_01872_mRNA_3.1      | -                               |
| GF0021767 | 1                               | 1                         | 0                            | Hypothetical protein (2)                                                                                                     |                                                                                                                                                                                                                                                                                                                                              |                                                                                                                                                                                                                                                                                                                               | scaffold_3_mRNA_883.1              | C_unshiu_00956_mRNA_4.1      | -                               |
| GF0021765 | 1                               | 1                         | 0                            | Putative sugar phosphate/phosphate translocator (2)                                                                          |                                                                                                                                                                                                                                                                                                                                              | Sugar phosphate transporter domain [IPR004853] (2)                                                                                                                                                                                                                                                                            | scaffold_3_mRNA_874.1              | C_unshiu_00412_mRNA_29.1     | -                               |
| GF0021764 | 1                               | 1                         | 0                            | Hypothetical protein (2)                                                                                                     | protein serine/threonine phosphatase activity [GO:0004722 molecular_function] (2); protein dephosphorylation [GO:0006470 biological_process] (2); catalytic activity [GO:0003624 molecular_function] (2); nucleic acid binding [GO:0003676 molecular_function] (2); RNA-DNA hybrid ribonuclease activity [GO:0004523 molecular_function] (1) | Protein phosphatase 2C family [IPR015655] (2); PPM-type phosphatase domain [IPR001932] (2)                                                                                                                                                                                                                                    | scaffold_3_mRNA_84.1               | C_unshiu_00850_mRNA_16.1     | -                               |
| GF0021762 | 1                               | 1                         | 0                            | Hypothetical protein (2)                                                                                                     | nucleoside-containing compound metabolic process [GO:0006139 biological_process] (2); methyltransferase activity [GO:0008168 molecular_function] (2)                                                                                                                                                                                         | MT-A70-like [IPR007757] (2); S-adenosyl-L-methionine-dependent methyltransferase [IPR029063] (2)                                                                                                                                                                                                                              | scaffold_3_mRNA_83.1               | C_unshiu_00850_mRNA_17.1     | -                               |
| GF0021760 | 1                               | 1                         | 0                            | mRNAdenosine methylase isoform 1 (2)                                                                                         | transferase activity [GO:0016740 molecular_function] (2); biosynthetic process [GO:0009058 biological_process] (2)                                                                                                                                                                                                                           | Squalene/phytosterol synthase [IPR002060] (2); Isoprenoid synthase domain [IPR008949] (2)                                                                                                                                                                                                                                     | scaffold_3_mRNA_818.1              | C_unshiu_00159_mRNA_42.1     | -                               |
| GF0021759 | 1                               | 1                         | 0                            | UPF0551 protein CkorD8 (2)                                                                                                   |                                                                                                                                                                                                                                                                                                                                              |                                                                                                                                                                                                                                                                                                                               |                                    |                              |                                 |
| GF0021756 | 1                               | 1                         | 0                            | Phosphoenolpyruvate carboxylase family protein (2)                                                                           | catalytic activity [GO:0003824 molecular_function] (2)                                                                                                                                                                                                                                                                                       | Pyruvate/Phosphoenolpyruvate kinase-like domain [IPR015813] (2); Hcp/HfpI aldolase/citrate lyase domain [IPR005000] (2)                                                                                                                                                                                                       | scaffold_3_mRNA_80.1               | C_unshiu_01206_mRNA_1.1      | -                               |
| GF0021752 | 1                               | 1                         | 0                            | Hypothetical protein (2)                                                                                                     |                                                                                                                                                                                                                                                                                                                                              |                                                                                                                                                                                                                                                                                                                               | scaffold_3_mRNA_785.1              | C_unshiu_00179_mRNA_24.1     | -                               |
| GF0021751 | 1                               | 1                         | 0                            | Hypothetical protein (2)                                                                                                     |                                                                                                                                                                                                                                                                                                                                              |                                                                                                                                                                                                                                                                                                                               | scaffold_3_mRNA_780.1              | C_unshiu_00179_mRNA_19.1     | -                               |
| GF0021750 | 1                               | 1                         | 0                            | Glyceroxytransferase PGSIIP8 (2)                                                                                             |                                                                                                                                                                                                                                                                                                                                              |                                                                                                                                                                                                                                                                                                                               | scaffold_3_mRNA_767.1              | C_unshiu_01746_mRNA_10.1     | -                               |
| GF0021749 | 1                               | 1                         | 0                            | Hypothetical protein (2)                                                                                                     |                                                                                                                                                                                                                                                                                                                                              |                                                                                                                                                                                                                                                                                                                               | scaffold_3_mRNA_763.1              | C_unshiu_01746_mRNA_7.1      | -                               |
| GF0021748 | 1                               | 1                         | 0                            | ATP-dependent caseinolytic serine/crotonease family protein isoform 2 (2)                                                    | nyano-tyase activity [GO:00010630 molecular_function] (1); 3-oxohydroxybutyryl-CoA hydrolase activity [GO:0003860 molecular_function] (2)                                                                                                                                                                                                    | Ctp/crotonease-like domain [IPR029045] (2); Enoyl-CoA hydratase/isomerase, HBBYL-CoA-H type [IPR032259] (2)                                                                                                                                                                                                                   | scaffold_3_mRNA_750.1              | C_unshiu_02184_mRNA_3.1      | -                               |
| GF0021744 | 1                               | 1                         | 0                            | Hypothetical protein (2)                                                                                                     | palmitoyl hydrolase activity [GO:0098599 molecular_function] (2)                                                                                                                                                                                                                                                                             | Palmitoyl protein thioesterase [IPR02472] (2); Alpha/Beta hydrolase fold [IPR029058] (2)                                                                                                                                                                                                                                      | scaffold_3_mRNA_722.1              | C_unshiu_00442_mRNA_9.1      | -                               |
| GF0021743 | 1                               | 1                         | 0                            | Ethylene responsive element binding factor, putative (2)                                                                     | DNA binding [GO:0003677 molecular_function] (2); transcription factor activity, sequence-specific DNA binding [GO:00700 molecular_function] (2); regulation of transcription, DNA-templated [GO:0006355 biological_process] (2)                                                                                                              | DNA-binding domain [IPR016177] (2); AP2/ERF domain [IPR001471] (2)                                                                                                                                                                                                                                                            | scaffold_3_mRNA_718.1              | C_unshiu_00795_mRNA_3.1      | -                               |
| GF0021742 | 1                               | 1                         | 0                            | G-type lectin S-receptor-like serine/threonine-protein kinase RLK1 (2)                                                       | protein phosphorylation [GO:0006468 biological_process] (1); protein kinase activity [GO:0004672 molecular_function] (1); ATP binding [GO:0005524 molecular_function] (1)                                                                                                                                                                    | Bull-tye lectin domain [IPR001480] (2); Protein kinase-like domain [IPR011009] (1); Protein kinase domain [IPR000719] (1); Serine/threonine dual specificity protein kinase, catalytic domain [IPR002290] (1); Protein kinase, ATP binding site [IPR017441] (1)                                                               | scaffold_3_mRNA_712.1              | C_unshiu_00795_mRNA_9.1      | -                               |
| GF0021741 | 1                               | 1                         | 0                            | Hypothetical protein (2)                                                                                                     |                                                                                                                                                                                                                                                                                                                                              |                                                                                                                                                                                                                                                                                                                               | scaffold_3_mRNA_699.1              | C_unshiu_00795_mRNA_11.1     | -                               |
| GF0021740 | 1                               | 1                         | 0                            | Hypothetical protein (2)                                                                                                     |                                                                                                                                                                                                                                                                                                                                              |                                                                                                                                                                                                                                                                                                                               | scaffold_3_mRNA_687.1              | C_unshiu_01638_mRNA_5.1      | -                               |
| GF0021738 | 1                               | 1                         | 0                            | Transcription factor IIB 90 kDa subunit (2)                                                                                  |                                                                                                                                                                                                                                                                                                                                              |                                                                                                                                                                                                                                                                                                                               | scaffold_3_mRNA_669.1              | C_unshiu_00628_mRNA_5.1      | -                               |
| GF0021737 | 1                               | 1                         | 0                            | Expansin-like B1 (2)                                                                                                         | extracellular region [GO:0005576 cellular_component] (2)                                                                                                                                                                                                                                                                                     | Expansin pollen allergen, DPBB domain [IPR007112] (2); Expansin Lot pl [IPR007118] (2); Expansin, cellulose-binding-like domain [IPR007117] (2); RipA-like double-pa beta-barrel domain [IPR00909] (1); RipA-like protein, double-pa beta-barrel domain [IPR00909] (1)                                                        | scaffold_3_mRNA_664.1              | C_unshiu_01811_mRNA_3.1      | -                               |
| GF0021735 | 1                               | 1                         | 0                            | Hypothetical protein (2)                                                                                                     |                                                                                                                                                                                                                                                                                                                                              |                                                                                                                                                                                                                                                                                                                               | scaffold_3_mRNA_657.1              | C_unshiu_00768_mRNA_12.1     | -                               |
| GF0021734 | 1                               | 1                         | 0                            | Subtilisin-like serine protease (2)                                                                                          | serine-type endopeptidase activity [GO:0004252 molecular_function] (2); proteolysis [GO:0006508 biological_process] (2)                                                                                                                                                                                                                      | Peptidase S8, subtilisin, Asp-active site [IPR023827] (2); Peptidase S8, subtilisin-related [IPR015500] (2); Peptidase S8/S53 domain [IPR00209] (2); Peptidase S8 propeptide/proteinase inhibitor 19 [IPR01029] (2); Cucumis-like catalytic domain [IPR034197] (1); Peptidase S8, subtilisin, Ser-active site [IPR023828] (1) | scaffold_3_mRNA_656.1              | C_unshiu_00768_mRNA_11.1     | -                               |
| GF0021732 | 1                               | 1                         | 0                            | Putative vacuolar sorting-associated protein 13B (1); Hypothetical protein (1)                                               |                                                                                                                                                                                                                                                                                                                                              |                                                                                                                                                                                                                                                                                                                               |                                    |                              |                                 |
| GF0021731 | 1                               | 1                         | 0                            | Putative vacuolar sorting-associated protein 13A (2)                                                                         |                                                                                                                                                                                                                                                                                                                                              |                                                                                                                                                                                                                                                                                                                               |                                    |                              |                                 |
| GF0021729 | 1                               | 1                         | 0                            | Heavy metal transport/detoxification superfamily protein (2)                                                                 | metal ion binding [GO:0046872 molecular_function] (2); metal ion transport [GO:0030001 biological_process] (2)                                                                                                                                                                                                                               | Heavy metal-associated domain, HMA [IPR006121] (2)                                                                                                                                                                                                                                                                            | scaffold_3_mRNA_6269.1             | C_unshiu_00971_mRNA_8.1      | -                               |
| GF0021728 | 1                               | 1                         | 0                            | Hypothetical protein (2)                                                                                                     | iron ion binding [GO:0005506 molecular_function] (2); oxidoreductase activity [GO:0016491 molecular_function] (2); oxidation-reduction process [GO:0055114 biological_process] (2); fatty acid biosynthesis [GO:0006633 biological_process] (1); lipid biosynthetic process [GO:0008010 biological_process] (1)                              |                                                                                                                                                                                                                                                                                                                               | scaffold_3_mRNA_6265.1             | C_unshiu_00971_mRNA_4.1      | -                               |
| GF0021723 | 1                               | 1                         | 0                            | Hypothetical protein (1); Protein WAX2 (1)                                                                                   |                                                                                                                                                                                                                                                                                                                                              | Fatty acid hydroxylase [IPR006694] (2); Uncharacterised domain Wax2, C-terminal [IPR021940] (2)                                                                                                                                                                                                                               | scaffold_3_mRNA_6255.2             | C_unshiu_00206_mRNA_42.1     | -                               |
| GF0021722 | 1                               | 1                         | 0                            | Hypothetical protein (2)                                                                                                     |                                                                                                                                                                                                                                                                                                                                              |                                                                                                                                                                                                                                                                                                                               | scaffold_3_mRNA_6234.1             | C_unshiu_00206_mRNA_22.1     | -                               |
| GF0021719 | 1                               | 1                         | 0                            | Blue copper protein (2)                                                                                                      | electron carrier activity [GO:0009055 molecular_function] (2)                                                                                                                                                                                                                                                                                | Phytocyanin domain [IPR003245] (2); Copper domain [IPR00972] (2)                                                                                                                                                                                                                                                              | scaffold_3_mRNA_6219.1             | C_unshiu_00206_mRNA_6.1      | -                               |
| GF0021718 | 1                               | 1                         | 0                            | Hypothetical protein (2)                                                                                                     | nucleic acid binding [GO:0003676 molecular_function] (2)                                                                                                                                                                                                                                                                                     | Ribonuclease H-like domain [IPR012337] (2)                                                                                                                                                                                                                                                                                    | scaffold_3_mRNA_6206.1             | C_unshiu_00014_mRNA_107.1    | -                               |

| ID        | Num. in <i>C. clementinae</i> | Num. in <i>C. ushishi</i> | Num. in <i>P. trifoliata</i> | Note                                                                                                   | GO                                                                                                                                                                                                                                                                                                                                                                                                                                                                                                                                                                                                                                                                | InterPro                                                                                                                                                                                                                                                                                                                                                                                                                                                  | Members in <i>C. clementinae</i> | Members in <i>C. ushishi</i> | Members in <i>P. trifoliata</i> |
|-----------|-------------------------------|---------------------------|------------------------------|--------------------------------------------------------------------------------------------------------|-------------------------------------------------------------------------------------------------------------------------------------------------------------------------------------------------------------------------------------------------------------------------------------------------------------------------------------------------------------------------------------------------------------------------------------------------------------------------------------------------------------------------------------------------------------------------------------------------------------------------------------------------------------------|-----------------------------------------------------------------------------------------------------------------------------------------------------------------------------------------------------------------------------------------------------------------------------------------------------------------------------------------------------------------------------------------------------------------------------------------------------------|----------------------------------|------------------------------|---------------------------------|
| GF0021717 | 1                             | 1                         | 0                            | Hypothetical protein (2)                                                                               | metal ion binding [GO:0046872 molecular_function] (2); nucleotide binding [GO:0001666 molecular_function] (2); integral component of membrane [GO:0016021 cellular_component] (1)                                                                                                                                                                                                                                                                                                                                                                                                                                                                                 | P-type ATPase, cytoplasmic domain N [IPRO23299] (2); Uncharacterized protein family UPP0565 [IPRO18881] (2); Cation-transporting P-type ATPase, N-terminal [IPRO04014] (2); P-type ATPase, A. domain [IPRO02501] (2); P-type ATPase, transmembrane domain [IPRO23298] (1); P-type ATPase [IPRO1757] (1)                                                                                                                                                   | scaffold_3_mRNA_6202.1           | C_ushishi_00014_mRNA_103.1   | -                               |
| GF0021716 | 1                             | 1                         | 0                            | 2-hydroxyisocinnamic semialdehyde hydrolase (2)                                                        | carbohydrate metabolic process [GO:0005975 biological_process] (2); catalytic activity [GO:0003824 molecular_function] (2); malate dehydrogenase activity [GO:0016615 molecular_function] (2); oxidoreductase activity, acting on the CH-OH group of donors, NAD or NADP as acceptor [GO:0016616 molecular_function] (2); L-lactate dehydrogenase activity [GO:0030600 molecular_function] (2); malate metabolic process [GO:0006108 biological_process] (2); oxidation-reduction process [GO:0055114 biological_process] (2); oxidoreductase activity [GO:0016491 molecular_function] (2); carboxylic acid metabolic process [GO:0019752 biological_process] (2) | Alpha/Beta hydrolase fold [IPRO29058] (2); Alpha/beta hydrolase fold-1 [IPRO00073] (2)                                                                                                                                                                                                                                                                                                                                                                    | scaffold_3_mRNA_62.1             | C_ushishi_00038_mRNA_7.1     | -                               |
| GF0021715 | 1                             | 1                         | 0                            | Malate dehydrogenase (2)                                                                               | carbohydrate metabolic process [GO:0005975 biological_process] (2); malate dehydrogenase activity [GO:0016615 molecular_function] (2); oxidoreductase activity, acting on the CH-OH group of donors, NAD or NADP as acceptor [GO:0016616 molecular_function] (2); L-lactate dehydrogenase activity [GO:0030600 molecular_function] (2); malate metabolic process [GO:0006108 biological_process] (2); oxidation-reduction process [GO:0055114 biological_process] (2); oxidoreductase activity [GO:0016491 molecular_function] (2); carboxylic acid metabolic process [GO:0019752 biological_process] (2)                                                         | Lactate/malate dehydrogenase, N-terminal [IPRO1236] (2); Malate dehydrogenase, active site [IPRO01252] (2); Malate dehydrogenase, NAD-dependent, cytosolic [IPRO11274] (2); Lactate dehydrogenase glycoside hydrolase, family 4, C-terminal [IPRO15955] (2); Malate dehydrogenase, type 2 [IPRO10945] (2); Lactate/malate dehydrogenase, C-terminal [IPRO22383] (2); L-lactate/malate dehydrogenase [IPRO1557] (2); NAD(P)-binding domain [IPRO16040] (2) | scaffold_3_mRNA_6175.1           | C_ushishi_00014_mRNA_77.1    | -                               |
| GF0021713 | 1                             | 1                         | 0                            | Putative crossover junction endonuclease (2)                                                           | rRNA processing [GO:0006364 biological_process] (2); nucleic acid metabolic process [GO:0006139 biological_process] (2); nucleic acid binding [GO:0003676 molecular_function] (2)                                                                                                                                                                                                                                                                                                                                                                                                                                                                                 | Ribonuclease H-like domain [IPRO12377] (2); Putative pre-16S rRNA nuclease [IPRO05227] (2); YqgF/RNase H-like domain [IPRO06641] (2)                                                                                                                                                                                                                                                                                                                      | scaffold_3_mRNA_6154.1           | C_ushishi_00018_mRNA_61.1    | -                               |
| GF0021712 | 1                             | 1                         | 0                            | Hypothetical protein (2)                                                                               |                                                                                                                                                                                                                                                                                                                                                                                                                                                                                                                                                                                                                                                                   |                                                                                                                                                                                                                                                                                                                                                                                                                                                           | scaffold_3_mRNA_6152.1           | C_ushishi_00014_mRNA_58.1    | -                               |
| GF0021711 | 1                             | 1                         | 0                            | Cytochrome P450 (2)                                                                                    |                                                                                                                                                                                                                                                                                                                                                                                                                                                                                                                                                                                                                                                                   |                                                                                                                                                                                                                                                                                                                                                                                                                                                           | scaffold_3_mRNA_6151.2           | C_ushishi_00014_mRNA_57.2    | -                               |
| GF0021709 | 1                             | 1                         | 0                            | Hypothetical protein (2)                                                                               |                                                                                                                                                                                                                                                                                                                                                                                                                                                                                                                                                                                                                                                                   |                                                                                                                                                                                                                                                                                                                                                                                                                                                           | scaffold_3_mRNA_6134.1           | C_ushishi_00014_mRNA_42.1    | -                               |
| GF0021708 | 1                             | 1                         | 0                            | SAUR family protein (2)                                                                                | response to auxin [GO:0009733 biological_process] (2)                                                                                                                                                                                                                                                                                                                                                                                                                                                                                                                                                                                                             | Small auxin-up RNA [IPRO03676] (2)                                                                                                                                                                                                                                                                                                                                                                                                                        | scaffold_3_mRNA_6133.1           | C_ushishi_00014_mRNA_41.1    | -                               |
| GF0021707 | 1                             | 1                         | 0                            | Hypothetical protein (2)                                                                               | pectinesterase activity [GO:0030599 molecular_function] (2); cell wall [GO:0005618 cellular_component] (2); cell wall modification [GO:0042545 biological_process] (2); enzyme inhibitor activity [GO:0004857 molecular_function] (1)                                                                                                                                                                                                                                                                                                                                                                                                                             | Pectinesterase, catalytic [IPRO00070] (2); Pectin lyase fold [IPRO12354] (2); Pectin lyase fold/violence factor [IPRO11050] (2); Pectinesterase inhibitor domain [IPRO06501] (1)                                                                                                                                                                                                                                                                          | scaffold_3_mRNA_6130.1           | C_ushishi_00014_mRNA_38.1    | -                               |
| GF0021706 | 1                             | 1                         | 0                            | Methionyl aminopeptidase (2)                                                                           | proteolysis [GO:0006508 biological_process] (2); aminopeptidase activity [GO:0004177 molecular_function] (2); metalloprotease activity [GO:0008235 molecular_function] (2)                                                                                                                                                                                                                                                                                                                                                                                                                                                                                        | Peptidase M24A, methionine aminopeptidase, subfamily 1 [IPRO02467] (2); MYND-like zinc finger, mRNA-binding [IPRO31615] (2); Peptidase M24, methionine aminopeptidase [IPRO01714] (2); Peptidase M24 [IPRO00994] (1); Peptidase M24, structural domain [IPRO00994] (1)                                                                                                                                                                                    | scaffold_3_mRNA_6129.1           | C_ushishi_00014_mRNA_37.1    | -                               |
| GF0021705 | 1                             | 1                         | 0                            | Hypothetical protein (1); Meiotic recombination protein DMC1 homolog (1)                               | ATP binding [GO:0005524 molecular_function] (2); DNA binding [GO:0003677 molecular_function] (2); DNA repair [GO:0006281 biological_process] (2); DNA-dependent ATPase activity [GO:0008094 molecular_function] (2)                                                                                                                                                                                                                                                                                                                                                                                                                                               | DNA recombination and repair protein RecA-like, ATP-binding domain [IPRO20588] (2); P-loop containing nucleoside triphosphate hydrolase [IPRO27417] (2); DNA recombination and repair protein Rad51, C-terminal [IPRO13632] (1); DNA recombination and repair protein Rad51-like, C-terminal [IPRO13632] (1)                                                                                                                                              | scaffold_3_mRNA_6120.1           | C_ushishi_00014_mRNA_28.1    | -                               |
| GF0021704 | 1                             | 1                         | 0                            | Glutathione S-transferase zeta class (2)                                                               | catalytic activity [GO:0003824 molecular_function] (2); protein binding [GO:0005515 molecular_function] (2); aromatic amino acid family metabolic process [GO:0009072 biological_process] (2); cytoplasm [GO:0005737 cellular_component] (2)                                                                                                                                                                                                                                                                                                                                                                                                                      | Thioredoxin-like fold [IPRO12336] (2); Glutathione S-transferase, N-terminal [IPRO04045] (2); Glutathione S-transferase, C-terminal-like [IPRO10987] (2); Glutathione S-transferase, class Zeta [IPRO09551] (1); Glutathione S-transferase, class Zeta, N-terminal [IPRO34333] (1); Glutathione S-transferase, class Zeta - C-terminal [IPRO34330] (1); Maleylacetoacetate isomerase [IPRO09551] (1)                                                      | scaffold_3_mRNA_6107.1           | C_ushishi_00014_mRNA_16.1    | -                               |
| GF0021702 | 1                             | 1                         | 0                            | Putative calcium-binding protein CML25 (2)                                                             | calcium ion binding [GO:0005509 molecular_function] (2)                                                                                                                                                                                                                                                                                                                                                                                                                                                                                                                                                                                                           | EF-Hand 1, calcium-binding site [IPRO18247] (2); EF-hand domain [IPRO20288] (2); EF-hand domain pair [IPRO11922] (2)                                                                                                                                                                                                                                                                                                                                      | scaffold_3_mRNA_6094.1           | C_ushishi_000126_mRNA_49.1   | -                               |
| GF0021693 | 1                             | 1                         | 0                            | Hypothetical protein (2)                                                                               | DNA binding [GO:0003677 molecular_function] (1); nucleus [GO:0005634 cellular_component] (1)                                                                                                                                                                                                                                                                                                                                                                                                                                                                                                                                                                      | Methyl-CpG DNA binding [IPRO01739] (1); DNA-binding domain [IPRO16177] (1)                                                                                                                                                                                                                                                                                                                                                                                | scaffold_3_mRNA_6032.1           | C_ushishi_00018_mRNA_116.1   | -                               |
| GF0021690 | 1                             | 1                         | 0                            | Adenosine deaminase, RNA binding, RNA binding, adenosine deaminases, putative isoform 2 (2)            | adenosine deaminase activity [GO:0004000 molecular_function] (2); RNA binding [GO:0003723 molecular_function] (2); RNA processing [GO:0006396 biological_process] (2)                                                                                                                                                                                                                                                                                                                                                                                                                                                                                             | Adenosine deaminase/oligase [IPRO24661] (2)                                                                                                                                                                                                                                                                                                                                                                                                               | scaffold_3_mRNA_6010.1           | C_ushishi_00018_mRNA_99.1    | -                               |
| GF0021689 | 1                             | 1                         | 0                            | Ripensing related protein family (2)                                                                   |                                                                                                                                                                                                                                                                                                                                                                                                                                                                                                                                                                                                                                                                   |                                                                                                                                                                                                                                                                                                                                                                                                                                                           | scaffold_3_mRNA_6003.1           | C_ushishi_00018_mRNA_92.1    | -                               |
| GF0021688 | 1                             | 1                         | 0                            | Hypothetical protein (2)                                                                               |                                                                                                                                                                                                                                                                                                                                                                                                                                                                                                                                                                                                                                                                   |                                                                                                                                                                                                                                                                                                                                                                                                                                                           | scaffold_3_mRNA_6.1              | C_ushishi_01604_mRNA_6.1     | -                               |
| GF0021686 | 1                             | 1                         | 0                            | Cysteine synthase (2)                                                                                  | cyamide metabolic process [GO:0019499 biological_process] (2); mitochondrion [GO:0005739 cellular_component] (2); L-3-cyanolalanine synthase activity [GO:0005017 molecular_function] (2); cysteine biosynthetic process from acetyl [GO:0006535 biological_process] (2); cysteine synthase activity [GO:0004124 molecular_function] (2)                                                                                                                                                                                                                                                                                                                          | Cysteine synthase CysK [IPRO05859] (2); L-3-cyanolalanine synthase, mitochondrial [IPRO31111] (2); Cysteine synthase/cystathionine beta-synthase, pyridoxal-phosphate attachment site [IPRO01216] (2); Tryptophan synthase beta subunit-like PLP-dependent enzyme [IPRO01926] (2); Cysteine synthase [IPRO05856] (2)                                                                                                                                      | scaffold_3_mRNA_5969.1           | C_ushishi_00018_mRNA_60.1    | -                               |
| GF0021685 | 1                             | 1                         | 0                            | ATP-dependent helicase BRM (2)                                                                         | ATP binding [GO:0005524 molecular_function] (2); nucleus [GO:0005634 cellular_component] (2); DNA-dependent ATPase activity [GO:0008094 molecular_function] (2); regulation of gene expression, epigenetic [GO:0040029 biological_process] (2); ATP-dependent chromatin remodeling [GO:0043044 biological_process] (2); regulation of transcription, DNA-templated [GO:0006355 biological_process] (2); protein binding [GO:0005515 molecular_function] (1)                                                                                                                                                                                                       | P-loop containing nucleoside triphosphate hydrolase [IPRO27417] (2); BR-AHA (BRM) ATPase [IPRO31056] (2); Glutamine-Leucine-Glutamine, QLG [IPRO14978] (2); Helicase superfamily 1C, ATP-binding domain [IPRO14901] (2); SNF2-related, N-terminal domain [IPRO00330] (2); Helicase, C-terminal [IPRO16160] (2); Bromodomain [IPRO01487] (1)                                                                                                               | scaffold_3_mRNA_5968.1           | C_ushishi_00018_mRNA_59.1    | -                               |
| GF0021684 | 1                             | 1                         | 0                            | Ubiquitin-conjugating enzyme E2 5 (2)                                                                  |                                                                                                                                                                                                                                                                                                                                                                                                                                                                                                                                                                                                                                                                   | Ubiquitin-conjugating enzyme, active site [IPRO23313] (2); Ubiquitin-conjugating enzyme RWD-like [IPRO16135] (2); Ubiquitin-conjugating enzyme E2 [IPRO06088] (2)                                                                                                                                                                                                                                                                                         | scaffold_3_mRNA_5967.1           | C_ushishi_00018_mRNA_58.1    | -                               |
| GF0021683 | 1                             | 1                         | 0                            | AT-rich interactive domain-containing protein 1 (2)                                                    | DNA binding [GO:0003677 molecular_function] (2)                                                                                                                                                                                                                                                                                                                                                                                                                                                                                                                                                                                                                   | ARID DNA-binding domain [IPRO01686] (2); ELM2 domain [IPRO09091] (1)                                                                                                                                                                                                                                                                                                                                                                                      | scaffold_3_mRNA_5966.1           | C_ushishi_00018_mRNA_57.1    | -                               |
| GF0021678 | 1                             | 1                         | 0                            | Reticulon-like protein B8 (2)                                                                          |                                                                                                                                                                                                                                                                                                                                                                                                                                                                                                                                                                                                                                                                   | Reticulon [IPRO03388] (2)                                                                                                                                                                                                                                                                                                                                                                                                                                 | scaffold_3_mRNA_5927.1           | C_ushishi_00018_mRNA_19.1    | -                               |
| GF0021677 | 1                             | 1                         | 0                            | Hypothetical protein (2)                                                                               |                                                                                                                                                                                                                                                                                                                                                                                                                                                                                                                                                                                                                                                                   |                                                                                                                                                                                                                                                                                                                                                                                                                                                           | scaffold_3_mRNA_5923.1           | C_ushishi_00018_mRNA_15.1    | -                               |
| GF0021676 | 1                             | 1                         | 0                            | Hypothetical protein (2)                                                                               |                                                                                                                                                                                                                                                                                                                                                                                                                                                                                                                                                                                                                                                                   |                                                                                                                                                                                                                                                                                                                                                                                                                                                           | scaffold_3_mRNA_5914.1           | C_ushishi_00026_mRNA_40.1    | -                               |
| GF0021675 | 1                             | 1                         | 0                            | BTB/POZ domain-containing protein P081 (2)                                                             | protein binding [GO:0005515 molecular_function] (2)                                                                                                                                                                                                                                                                                                                                                                                                                                                                                                                                                                                                               | TRAF-like [IPRO08974] (2); BTB/POZ domain [IPRO02101] (2); BTB/Kelch-associated [IPRO11705] (2); SKP1/BTB/POZ domain [IPRO11333] (2)                                                                                                                                                                                                                                                                                                                      | scaffold_3_mRNA_5909.1           | C_ushishi_00026_mRNA_43.1    | -                               |
| GF0021673 | 1                             | 1                         | 0                            | Arabinogalactan protein 20 (2)                                                                         |                                                                                                                                                                                                                                                                                                                                                                                                                                                                                                                                                                                                                                                                   | Arabinogalactan peptide, AGP [IPRO09424] (2)                                                                                                                                                                                                                                                                                                                                                                                                              | scaffold_3_mRNA_5901.1           | C_ushishi_00026_mRNA_51.1    | -                               |
| GF0021670 | 1                             | 1                         | 0                            | Kinase superfamily protein, putative isoform 1 (1); Kinase superfamily protein, putative isoform 2 (1) | ATP binding [GO:0005524 molecular_function] (2); protein kinase activity [GO:0004672 molecular_function] (2); protein phosphorylation [GO:0006468 biological_process] (2)                                                                                                                                                                                                                                                                                                                                                                                                                                                                                         | Protein kinase-like domain [IPRO11009] (2); Protein kinase domain [IPRO00719] (2); Serine/threonine-protein kinase, active site [IPRO08271] (2); Serine/threonine/dual specificity protein kinase, catalytic domain [IPRO02790] (1)                                                                                                                                                                                                                       | scaffold_3_mRNA_589.1            | C_ushishi_01817_mRNA_6.1     | -                               |
| GF0021669 | 1                             | 1                         | 0                            | Poly(A) RNA polymerase cid14 (2)                                                                       |                                                                                                                                                                                                                                                                                                                                                                                                                                                                                                                                                                                                                                                                   |                                                                                                                                                                                                                                                                                                                                                                                                                                                           | scaffold_3_mRNA_5884.1           | C_ushishi_00026_mRNA_66.1    | -                               |
| GF0021668 | 1                             | 1                         | 0                            | DUF1442 family protein (2)                                                                             |                                                                                                                                                                                                                                                                                                                                                                                                                                                                                                                                                                                                                                                                   | Protein of unknown function DUF1442 [IPRO09902] (2); S-adenosyl-L-methionine-dependent methyltransferase [IPRO29063] (2)                                                                                                                                                                                                                                                                                                                                  | scaffold_3_mRNA_5871.1           | C_ushishi_00026_mRNA_80.1    | -                               |
| GF0021667 | 1                             | 1                         | 0                            | Hypothetical protein (2)                                                                               | oxidation-reduction process [GO:0055114 biological_process] (2); UDP-N-acetylmuramic dehydrogenase activity [GO:0008762 molecular_function] (2)                                                                                                                                                                                                                                                                                                                                                                                                                                                                                                                   | UDP-N-acetylmuramic dehydrogenase reductase, C-terminal [IPRO11601] (2)                                                                                                                                                                                                                                                                                                                                                                                   | scaffold_3_mRNA_5866.1           | C_ushishi_00026_mRNA_87.1    | -                               |



| ID        | Num. in <i>C. clementiae</i> | Num. in <i>C. acicola</i> | Num. in <i>P. trifoliate</i> | Note                                                                                   | GO                                                                                                                                                                                                                                                                                                                                                                                                                                                                                                          | InterPro                                                                                                                                                                                                                                                                                                                                                                                                                                     | Members in <i>C. clementiae</i> | Members in <i>C. acicola</i> | Members in <i>P. trifoliate</i> |
|-----------|------------------------------|---------------------------|------------------------------|----------------------------------------------------------------------------------------|-------------------------------------------------------------------------------------------------------------------------------------------------------------------------------------------------------------------------------------------------------------------------------------------------------------------------------------------------------------------------------------------------------------------------------------------------------------------------------------------------------------|----------------------------------------------------------------------------------------------------------------------------------------------------------------------------------------------------------------------------------------------------------------------------------------------------------------------------------------------------------------------------------------------------------------------------------------------|---------------------------------|------------------------------|---------------------------------|
| GF0021666 | 1                            | 1                         | 0                            | Molybdenum cofactor biosynthesis protein C (2)                                         | Mo-molybdopterin cofactor biosynthetic process [GO:006777] biological_process (2)                                                                                                                                                                                                                                                                                                                                                                                                                           | Molybdopterin cofactor biosynthesis C (Most) domain [IPRO02920] (2); Molybdenum cofactor biosynthesis C [IPRO23045] (2); Molybdenum cofactor biosynthesis C, bacterial-type [IPRO23046] (1)                                                                                                                                                                                                                                                  | scaffold_3_mRNA_5865.1          | C_umshii_00026_mRNA_88.2     | -                               |
| GF0021665 | 1                            | 1                         | 0                            | Hypothetical protein (2)                                                               |                                                                                                                                                                                                                                                                                                                                                                                                                                                                                                             |                                                                                                                                                                                                                                                                                                                                                                                                                                              | scaffold_3_mRNA_5858.1          | C_umshii_00261_mRNA_20.1     | -                               |
| GF0021663 | 1                            | 1                         | 0                            | Kruppel-like factor 17 (2)                                                             |                                                                                                                                                                                                                                                                                                                                                                                                                                                                                                             |                                                                                                                                                                                                                                                                                                                                                                                                                                              | scaffold_3_mRNA_5853.1          | C_umshii_00263_mRNA_15.1     | -                               |
| GF0021660 | 1                            | 1                         | 0                            | Spotted leaf protein, putative (2)                                                     | protein ubiquitination [GO:0016567] biological_process (2); ubiquitin-protein transferase activity [GO:0004842] molecular_function (2); protein binding [GO:0005515] molecular_function (2); binding [GO:0005488] molecular_function (2)                                                                                                                                                                                                                                                                    | Armadillo-type fold [IPRO16024] (2); Armadillo [IPRO00225] (2); U box domain [IPRO03613] (2); Armadillo-like helical [IPRO11989] (2); Zinc finger, RINGFYVE/PHD-type [IPRO13083] (2); Powdery mildew resistance protein, RPW8 domain [IPRO08808] (1)                                                                                                                                                                                         | scaffold_3_mRNA_5838.1          | C_umshii_00978_mRNA_2.1      | -                               |
| GF0021659 | 1                            | 1                         | 0                            | Translation initiation factor IF-2 (2)                                                 |                                                                                                                                                                                                                                                                                                                                                                                                                                                                                                             | Protein of unknown function DUF4079 [IPRO23067] (2)                                                                                                                                                                                                                                                                                                                                                                                          | scaffold_3_mRNA_5833.1          | C_umshii_00978_mRNA_7.1      | -                               |
| GF0021658 | 1                            | 1                         | 0                            | Isoflavone reductase family protein (2)                                                |                                                                                                                                                                                                                                                                                                                                                                                                                                                                                                             |                                                                                                                                                                                                                                                                                                                                                                                                                                              | scaffold_3_mRNA_5832.1          | C_umshii_00978_mRNA_8.1      | -                               |
| GF0021657 | 1                            | 1                         | 0                            | Hypothetical protein (2)                                                               |                                                                                                                                                                                                                                                                                                                                                                                                                                                                                                             |                                                                                                                                                                                                                                                                                                                                                                                                                                              | scaffold_3_mRNA_5827.1          | C_umshii_01669_mRNA_2.1      | -                               |
| GF0021656 | 1                            | 1                         | 0                            | Hypothetical protein (1); D-arabinono-1,4-lactone oxidase family protein (1)           | oxidation-reduction process [GO:0055114] biological_process (2); D-arabinono-1,4-lactone oxidase activity [GO:0003885] molecular_function (2); membrane [GO:0016020] cellular_component (2); protein binding [GO:0005515] molecular_function (1)                                                                                                                                                                                                                                                            | D-arabinono-1,4-lactone oxidase [IPRO07173] (2); L-gulonolactone oxidase, plant [IPRO10030] (2); IQ motif, EF-hand binding site [IPRO00048] (1)                                                                                                                                                                                                                                                                                              | scaffold_3_mRNA_5811.1          | C_umshii_00023_mRNA_95.1     | -                               |
| GF0021655 | 1                            | 1                         | 0                            | DELLA protein (1); DELLA protein RGL3 (1)                                              |                                                                                                                                                                                                                                                                                                                                                                                                                                                                                                             | Transcription factor GRAS [IPRO05202] (2)                                                                                                                                                                                                                                                                                                                                                                                                    | scaffold_3_mRNA_580.1           | C_umshii_00318_mRNA_5.1      | -                               |
| GF0021653 | 1                            | 1                         | 0                            | Hypothetical protein (2)                                                               |                                                                                                                                                                                                                                                                                                                                                                                                                                                                                                             |                                                                                                                                                                                                                                                                                                                                                                                                                                              | scaffold_3_mRNA_5782.1          | C_umshii_00023_mRNA_69.1     | -                               |
| GF0021652 | 1                            | 1                         | 0                            | Hypothetical protein (2)                                                               |                                                                                                                                                                                                                                                                                                                                                                                                                                                                                                             |                                                                                                                                                                                                                                                                                                                                                                                                                                              | scaffold_3_mRNA_578.1           | C_umshii_00318_mRNA_7.1      | -                               |
| GF0021650 | 1                            | 1                         | 0                            | Nodulin MN21 family protein (2)                                                        | integral component of membrane [GO:0016021] cellular_component (2); membrane [GO:0016020] cellular_component (2); transmembrane transporter activity [GO:0022857] molecular_function (2)                                                                                                                                                                                                                                                                                                                    | WAT1-related protein [IPRO01184] (2); EmsA domain [IPRO00620] (2)                                                                                                                                                                                                                                                                                                                                                                            | scaffold_3_mRNA_5772.1          | C_umshii_00023_mRNA_56.1     | -                               |
| GF0021649 | 1                            | 1                         | 0                            | Hypothetical protein (2)                                                               |                                                                                                                                                                                                                                                                                                                                                                                                                                                                                                             |                                                                                                                                                                                                                                                                                                                                                                                                                                              | scaffold_3_mRNA_5741.1          | C_umshii_00023_mRNA_24.1     | -                               |
| GF0021646 | 1                            | 1                         | 0                            | ABC transporter B family member 4 (1); ABC transporter B family member 11 (1)          | ATP binding [GO:0005524] molecular_function (2); transmembrane transport [GO:0055085] biological_process (2); ATPase activity, coupled to transmembrane movement of substances [GO:0042626] molecular_function (2); transport [GO:0006810] biological_process (2); integral component of membrane [GO:0016021] cellular_component (2); ATPase activity [GO:0016887] molecular_function (2); transferase activity, transferring acyl groups other than amino-acyl groups [GO:0016747] molecular_function (1) | ABC transporter, conserved site [IPRO17871] (2); AAA+ ATPase domain [IPRO03593] (2); ABC transporter type 1, transmembrane domain [IPRO11527] (2); ABC transporter-like [IPRO03429] (2); P-loop containing nucleoside triphosphate hydrolase [IPRO27417] (2); Transferrin [IPRO03400] (1); Chloramphenicol acetyltransferase-like domain [IPRO23213] (1)                                                                                     | scaffold_3_mRNA_5728.1          | C_umshii_00023_mRNA_11.1     | -                               |
| GF0021642 | 1                            | 1                         | 0                            | Hypothetical protein (2)                                                               |                                                                                                                                                                                                                                                                                                                                                                                                                                                                                                             |                                                                                                                                                                                                                                                                                                                                                                                                                                              | scaffold_3_mRNA_5705.1          | C_umshii_01129_mRNA_1.1      | -                               |
| GF0021640 | 1                            | 1                         | 0                            | Hypothetical protein (2)                                                               | DNA binding [GO:0003677] molecular_function (2)                                                                                                                                                                                                                                                                                                                                                                                                                                                             | B3 DNA binding domain [IPRO03340] (2); DNA-binding pseudorearranged domain [IPRO15300] (2)                                                                                                                                                                                                                                                                                                                                                   | scaffold_3_mRNA_5702.1          | C_umshii_00053_mRNA_67.1     | -                               |
| GF0021637 | 1                            | 1                         | 0                            | Hemexetin (1); Non-LTR reverse transcriptase (1)                                       |                                                                                                                                                                                                                                                                                                                                                                                                                                                                                                             | Endonuclease/exonuclease/phosphatase [IPRO05135] (2)                                                                                                                                                                                                                                                                                                                                                                                         | scaffold_3_mRNA_5670.1          | C_umshii_00060_mRNA_14.1     | -                               |
| GF0021636 | 1                            | 1                         | 0                            | Hypothetical protein (2)                                                               |                                                                                                                                                                                                                                                                                                                                                                                                                                                                                                             |                                                                                                                                                                                                                                                                                                                                                                                                                                              | scaffold_3_mRNA_5664.1          | C_umshii_00053_mRNA_33.1     | -                               |
| GF0021635 | 1                            | 1                         | 0                            | Hypothetical protein (2)                                                               |                                                                                                                                                                                                                                                                                                                                                                                                                                                                                                             |                                                                                                                                                                                                                                                                                                                                                                                                                                              | scaffold_3_mRNA_5663.1          | C_umshii_00053_mRNA_32.1     | -                               |
| GF0021634 | 1                            | 1                         | 0                            | Hypothetical protein (2)                                                               |                                                                                                                                                                                                                                                                                                                                                                                                                                                                                                             |                                                                                                                                                                                                                                                                                                                                                                                                                                              | scaffold_3_mRNA_5660.1          | C_umshii_00053_mRNA_29.1     | -                               |
| GF0021632 | 1                            | 1                         | 0                            | Hypothetical protein (2)                                                               | heme binding [GO:0020037] molecular_function (2)                                                                                                                                                                                                                                                                                                                                                                                                                                                            | cytochrome c-b2-LHMB30 reductase-like, haem-binding domain [IPRO19020] (*)                                                                                                                                                                                                                                                                                                                                                                   | scaffold_3_mRNA_5659.1          | C_umshii_00053_mRNA_28.1     | -                               |
| GF0021631 | 1                            | 1                         | 0                            | Hypothetical protein (2)                                                               |                                                                                                                                                                                                                                                                                                                                                                                                                                                                                                             |                                                                                                                                                                                                                                                                                                                                                                                                                                              | scaffold_3_mRNA_5658.1          | C_umshii_00053_mRNA_27.1     | -                               |
| GF0021630 | 1                            | 1                         | 0                            | Hypothetical protein (2)                                                               |                                                                                                                                                                                                                                                                                                                                                                                                                                                                                                             |                                                                                                                                                                                                                                                                                                                                                                                                                                              | scaffold_3_mRNA_5654.1          | C_umshii_00053_mRNA_23.1     | -                               |
| GF0021629 | 1                            | 1                         | 0                            | ATP-dependent Clp protease, proteolytic subunit ClpP (2)                               | proteolysis [GO:0006508] biological_process (2); serine-type endopeptidase activity [GO:0004252] molecular_function (2)                                                                                                                                                                                                                                                                                                                                                                                     | Clp protease proteolytic subunit /Translocation-enhancing protein TapA [IPRO23562] (2); ClpP, Ser active site [IPRO18213] (2); ClpP/crotonase-like domain [IPRO09465] (2); ATP-dependent Clp protease proteolytic subunit [IPRO01907] (2); ClpP, histidine active site [IPRO33355] (1)                                                                                                                                                       | scaffold_3_mRNA_5647.1          | C_umshii_00053_mRNA_17.1     | -                               |
| GF0021626 | 1                            | 1                         | 0                            | Hypothetical protein (2)                                                               |                                                                                                                                                                                                                                                                                                                                                                                                                                                                                                             |                                                                                                                                                                                                                                                                                                                                                                                                                                              | scaffold_3_mRNA_5621.1          | C_umshii_00291_mRNA_22.1     | -                               |
| GF0021625 | 1                            | 1                         | 0                            | DNA-(apurinic or apyrimidinic site) lyase (2)                                          | nuclease activity [GO:0004518] molecular_function (2); DNA repair [GO:0006281] biological_process (2)                                                                                                                                                                                                                                                                                                                                                                                                       | AP endonuclease I [IPRO04808] (2); Endonuclease/exonuclease/phosphatase [IPRO05135] (2)                                                                                                                                                                                                                                                                                                                                                      | scaffold_3_mRNA_562.1           | C_umshii_00318_mRNA_21.1     | -                               |
| GF0021622 | 1                            | 1                         | 0                            | Cellulose synthase (1); Hypothetical protein (1)                                       | cellulose biosynthetic process [GO:0030244] biological_process (1); membrane [GO:0016020] cellular_component (1); cellulose synthase (UDP-forming) activity [GO:0016760] molecular_function (1)                                                                                                                                                                                                                                                                                                             | Zinc finger, RINGFYVE/PHD-type [IPRO13083] (2); Nucleotide-diphosphate sugar transferases [IPRO29944] (1); Cellulose synthase [IPRO05150] (1)                                                                                                                                                                                                                                                                                                | scaffold_3_mRNA_5592.1          | C_umshii_00139_mRNA_1.1      | -                               |
| GF0021621 | 1                            | 1                         | 0                            | Hypothetical protein (2)                                                               |                                                                                                                                                                                                                                                                                                                                                                                                                                                                                                             |                                                                                                                                                                                                                                                                                                                                                                                                                                              | scaffold_3_mRNA_5587.1          | C_umshii_00007_mRNA_24.1     | -                               |
| GF0021620 | 1                            | 1                         | 0                            | DUF789 family protein (2)                                                              |                                                                                                                                                                                                                                                                                                                                                                                                                                                                                                             | Protein of unknown function DUF789 [IPRO08507] (2)                                                                                                                                                                                                                                                                                                                                                                                           | scaffold_3_mRNA_5586.1          | C_umshii_00139_mRNA_6.1      | -                               |
| GF0021617 | 1                            | 1                         | 0                            | Hypothetical protein (1); Putative protein-rich receptor-like protein kinase PERK1 (1) | ATP binding [GO:0005524] molecular_function (2); protein kinase activity [GO:000472] molecular_function (2); protein phosphorylation [GO:0006468] biological_process (2); polyglutaminase activity [GO:0004650] molecular_function (1); carbohydrate metabolic process [GO:0005975] biological_process (1)                                                                                                                                                                                                  | Protein kinase domain [IPRO00719] (2); Protein kinase-like domain [IPRO11009] (2); Pectin lyase fold [IPRO12334] (1); Serine-threonine/tyrosine-protein kinase, catalytic domain [IPRO01245] (1); Serine-threonine/tyrosine-protein kinase catalytic domain [IPRO01245] (1); Pectin lyase fold/virulence factor [IPRO1050] (1); Rossmann-like alpha/beta/alpha sandwich fold [IPRO14729] (1); Glycoside hydrolase, family 28 [IPRO00743] (1) | scaffold_3_mRNA_5573.1          | C_umshii_00139_mRNA_15.1     | -                               |
| GF0021614 | 1                            | 1                         | 0                            | Hypothetical protein (2)                                                               | catalytic activity [GO:0003824] molecular_function (2); transaminase activity [GO:0008483] molecular_function (1); pyridoxal phosphate binding [GO:0030170] molecular_function (1)                                                                                                                                                                                                                                                                                                                          | Pyridoxal phosphate-dependent transferase, major region, subdomain 2 [IPRO15422] (1); Aminotransferase class-II [IPRO0584] (1); Pyridoxal phosphate-dependent transferase, subdomain 2 [IPRO15422] (1)                                                                                                                                                                                                                                       | scaffold_3_mRNA_5565.1          | C_umshii_00662_mRNA_1.1      | -                               |
| GF0021613 | 1                            | 1                         | 0                            | Ribosomal L22e family protein (2)                                                      | structural constituent of ribosome [GO:0003735] molecular_function (2); translation [GO:0006412] biological_process (2); intracellular [GO:0005622] cellular_component (2); ribosome [GO:0005840] cellular_component (2)                                                                                                                                                                                                                                                                                    | Ribosomal protein L22e [IPRO02671] (2)                                                                                                                                                                                                                                                                                                                                                                                                       | scaffold_3_mRNA_5546.1          | C_umshii_00662_mRNA_24.1     | -                               |
| GF0021608 | 1                            | 1                         | 0                            | Cullin 1 (2)                                                                           | ubiquitin-dependent protein catabolic process [GO:0006511] biological_process (2); ubiquitin protein ligase binding [GO:0031625] molecular_function (2); cullin-RING ubiquitin ligase complex [GO:0031461] cellular_component (2)                                                                                                                                                                                                                                                                           | Cullin homology [IPRO16158] (2); Cullin, N-terminal [IPRO01373] (2); Cullin protein, neddylation domain [IPRO19559] (2); Cullin repeat-like-containing domain [IPRO16159] (2); Winged helix-turn-helix DNA-binding domain [IPRO11991] (2); Cullin conserved site [IPRO16157] (2)                                                                                                                                                             | scaffold_3_mRNA_5495.1          | C_umshii_00546_mRNA_2.1      | -                               |
| GF0021607 | 1                            | 1                         | 0                            | DUF1713 domain protein (2)                                                             |                                                                                                                                                                                                                                                                                                                                                                                                                                                                                                             | Domain of unknown function DUF1713, mitochondria [IPRO13177] (1); Domain of unknown function DUF1713 [IPRO13177] (1)                                                                                                                                                                                                                                                                                                                         | scaffold_3_mRNA_549.1           | C_umshii_00849_mRNA_18.1     | -                               |
| GF0021605 | 1                            | 1                         | 0                            | Hypothetical protein (2)                                                               |                                                                                                                                                                                                                                                                                                                                                                                                                                                                                                             |                                                                                                                                                                                                                                                                                                                                                                                                                                              | scaffold_3_mRNA_5487.1          | C_umshii_00546_mRNA_9.1      | -                               |
| GF0021604 | 1                            | 1                         | 0                            | Hypothetical protein (2)                                                               | cell redox homeostasis [GO:0045454] biological_process (2); electron carrier molecular_function (2); protein disulfide oxidoreductase activity [GO:0015035] molecular_function (2)                                                                                                                                                                                                                                                                                                                          | Glutaredoxin subgroup [IPRO14025] (2); Thioredoxin-like fold [IPRO12336] (2); Glutaredoxin [IPRO02109] (2); Glutaredoxin-like, plant II [IPRO11905] (2)                                                                                                                                                                                                                                                                                      | scaffold_3_mRNA_5483.1          | C_umshii_00546_mRNA_13.1     | -                               |
| GF0021602 | 1                            | 1                         | 0                            | Hypothetical protein (2)                                                               | regulation of transcription, DNA-templated [GO:0006355] biological_process (2)                                                                                                                                                                                                                                                                                                                                                                                                                              | FHY3/FAR1 family [IPRO31052] (2); FAR1 DNA binding domain [IPRO04330] (2)                                                                                                                                                                                                                                                                                                                                                                    | scaffold_3_mRNA_5468.1          | C_umshii_00251_mRNA_17.1     | -                               |
| GF0021601 | 1                            | 1                         | 0                            | Hypothetical protein (2)                                                               |                                                                                                                                                                                                                                                                                                                                                                                                                                                                                                             | Serine endopeptidase DegP2 [IPRO15724] (1)                                                                                                                                                                                                                                                                                                                                                                                                   | scaffold_3_mRNA_5467.1          | C_umshii_00817_mRNA_8.1      | -                               |
| GF0021595 | 1                            | 1                         | 0                            | Sugar transporter ERD6-like 16 (1); Sugar transporter ERD6-like 7 (1)                  | transmembrane transport [GO:0055085] biological_process (2); integral component of membrane [GO:0016021] cellular_component (2); transmembrane transporter activity [GO:0022857] molecular_function (2); protein kinase activity [GO:000472] molecular_function (1); protein phosphorylation [GO:0006468] biological_process (1)                                                                                                                                                                            | Major facilitator, sugar transporter-like [IPRO05828] (2); Major facilitator superfamily domain [IPRO20846] (2); Protein kinase-like domain [IPRO11009] (1); Serine-threonine/tyrosine-protein kinase, catalytic domain [IPRO01245] (1)                                                                                                                                                                                                      | scaffold_3_mRNA_5434.1          | C_umshii_00069_mRNA_21.1     | -                               |
| GF0021590 | 1                            | 1                         | 0                            | PALE CRESS protein (PAC) (2)                                                           | plastid [GO:0009536] cellular_component (1); leaf development [GO:0048366] biological_process (1); chloroplast organization [GO:0009658] biological_process (1); chloroplast mRNA processing [GO:0010239] biological_process (1)                                                                                                                                                                                                                                                                            | Protein PALE CRESS [IPRO34563] (1)                                                                                                                                                                                                                                                                                                                                                                                                           | scaffold_3_mRNA_5401.1          | C_umshii_00069_mRNA_52.1     | -                               |



| ID        | Num. in <i>C. caryophyllata</i> | Num. in <i>C. aculeata</i> | Num. in <i>P. trifoliata</i> | Note                                      | GO                                                                                                                                                                                                                                                                                                                          | InterPro                                                                                                                                                                                                                                                                                                                                                                                                                                                | Members in <i>C. caryophyllata</i>               | Members in <i>C. aculeata</i>                                                                            | Members in <i>P. trifoliata</i> |
|-----------|---------------------------------|----------------------------|------------------------------|-------------------------------------------|-----------------------------------------------------------------------------------------------------------------------------------------------------------------------------------------------------------------------------------------------------------------------------------------------------------------------------|---------------------------------------------------------------------------------------------------------------------------------------------------------------------------------------------------------------------------------------------------------------------------------------------------------------------------------------------------------------------------------------------------------------------------------------------------------|--------------------------------------------------|----------------------------------------------------------------------------------------------------------|---------------------------------|
| GF0021492 | 1                               | 1                          | 0                            | Hypothetical protein (2)                  | Reverse transcriptase domain [IPR00477] (2);<br>magnesium ion binding [GO:000287 molecular_function] (2); terpene synthase activity [GO:0010333 molecular_function] (2); base activity [GO:001629 molecular_function] (2); metabolic process [GO:0008152 biological_process] (2)                                            | Reverse transcriptase domain [IPR00477] (2);<br>Terpene synthase, metal-binding domain [IPR005630] (2); Terpene synthase, N-terminal domain [IPR01906] (2);<br>Terpenoid cyclase/terpene prenyltransferase alpha-alpha toroid [IPR008930] (2); Isoprenoid synthase domain [IPR00899] (2)<br>Cognate [IPR01734] (2); von Willbrand factor, type A [IPR02035] (2); Zinc finger, RING-FYVE/PHD-type [IPR013083] (1); Zinc finger, RING-type [IPR01841] (1) | scaffold_3_mRNA_4573.1<br>scaffold_3_mRNA_4572.1 | C_unshiu_01878_mRNA_4.1<br>C_unshiu_00523_mRNA_7.1                                                       | -                               |
| GF0021491 | 1                               | 1                          | 0                            | Isoprene synthase (2)                     | protein binding [GO:0005515 molecular_function] (1); zinc ion binding [GO:0008270 molecular_function] (1)                                                                                                                                                                                                                   | Ribonuclease H-like domain [IPR012337] (2); HAT, C-terminal dimerisation domain [IPR008906] (2);<br>Zinc finger, BED-type [IPR003656] (1)                                                                                                                                                                                                                                                                                                               | scaffold_3_mRNA_4562.1                           | C_unshiu_00523_mRNA_16.1                                                                                 | -                               |
| GF0021490 | 1                               | 1                          | 0                            | E3 ubiquitin-protein ligase RGLG2 (2)     | nucleic acid binding [GO:0003676 molecular_function] (2); protein dimerization activity [GO:0046983 molecular_function] (2); DNA binding [GO:0003677 molecular_function] (1)                                                                                                                                                | Zinc finger, BED-type [IPR003656] (2);<br>Zinc finger C2H2-type [IPR013087] (1)                                                                                                                                                                                                                                                                                                                                                                         | scaffold_3_mRNA_4538.1                           | C_unshiu_00522_mRNA_7.1                                                                                  | -                               |
| GF0021487 | 1                               | 1                          | 0                            | Hypothetical protein (2)                  | DNA binding [GO:0003677 molecular_function] (2); nucleic acid binding [GO:0003676 molecular_function] (1)                                                                                                                                                                                                                   | HAT, C-terminal dimerisation domain [IPR008906] (2); Ribonuclease H-like domain [IPR012337] (1)                                                                                                                                                                                                                                                                                                                                                         | scaffold_3_mRNA_4519.1                           | C_unshiu_00502_mRNA_20.1                                                                                 | -                               |
| GF0021485 | 1                               | 1                          | 0                            | Hypothetical protein (2)                  | protein dimerization activity [GO:0046983 molecular_function] (2); nucleic acid binding [GO:0003676 molecular_function] (1)                                                                                                                                                                                                 | IDR domain [IPR022867] (2); Zinc finger, RING-FYVE/PHD-type [IPR013083] (2); Zinc finger, RING-type, conserved site [IPR017907] (2); E3 ubiquitin ligase RBR family [IPR031127] (2)                                                                                                                                                                                                                                                                     | scaffold_3_mRNA_4516.1<br>scaffold_3_mRNA_4511.1 | C_unshiu_00912_mRNA_19.1<br>C_unshiu_00502_mRNA_15.1                                                     | -                               |
| GF0021484 | 1                               | 1                          | 0                            | Hypothetical protein (2)                  | protein dimerization activity [GO:0046983 molecular_function] (2); nucleic acid binding [GO:0003676 molecular_function] (1)                                                                                                                                                                                                 | IBR domain [IPR022867] (2); Zinc finger, RING-FYVE/PHD-type [IPR013083] (2); Zinc finger, RING-type, conserved site [IPR017907] (2); E3 ubiquitin ligase RBR family [IPR031127] (2)                                                                                                                                                                                                                                                                     | scaffold_3_mRNA_4487.1                           | C_unshiu_00471_mRNA_18.1                                                                                 | -                               |
| GF0021483 | 1                               | 1                          | 0                            | Hypothetical protein (2)                  | protein dimerization activity [GO:0046983 molecular_function] (2); nucleic acid binding [GO:0003676 molecular_function] (1)                                                                                                                                                                                                 | BURP domain [IPR004873] (2)                                                                                                                                                                                                                                                                                                                                                                                                                             | scaffold_3_mRNA_442.1                            | C_unshiu_00902_mRNA_57.1                                                                                 | -                               |
| GF0021481 | 1                               | 1                          | 0                            | Hypothetical protein (2)                  | chitin catabolic process [GO:0006032 biological_process] (2); carbohydrate biological process [GO:0005975 biological_process] (2); chitinase activity [GO:0004568 molecular_function] (2); cell wall macromolecule catabolic process [GO:0016998 biological_process] (2)                                                    | Glycoside hydrolase, family 19, catalytic [IPR00726] (2); Lysozyme-like domain [IPR023360] (2); Glycoside hydrolase, family 19 [IPR016283] (2)                                                                                                                                                                                                                                                                                                          | scaffold_3_mRNA_4415.1                           | C_unshiu_00054_mRNA_11.1                                                                                 | -                               |
| GF0021480 | 1                               | 1                          | 0                            | Class IV chitinase (2)                    | cell wall macromolecule catabolic process [GO:0016998 biological_process] (2); chitin catabolic process [GO:0006032 biological_process] (2); chitin binding [GO:0008061 molecular_function] (2); chitinase activity [GO:0004568 molecular_function] (2); carbohydrate metabolic process [GO:0005975 biological_process] (2) | Chitin-binding, type 1 [IPR001002] (2); Glycoside hydrolase, family 19, catalytic [IPR00726] (2); Lysozyme-like domain [IPR023360] (2); Glycoside hydrolase, family 19 [IPR016283] (2)                                                                                                                                                                                                                                                                  | scaffold_3_mRNA_4410.1                           | C_unshiu_00054_mRNA_15.1                                                                                 | -                               |
| GF0021474 | 1                               | 1                          | 0                            | Polysialuronase 1 beta-like protein 1 (2) | biological process [GO:0006032 biological_process] (2); carbohydrate biological process [GO:0005975 biological_process] (2); chitinase activity [GO:0004568 molecular_function] (2); cell wall macromolecule catabolic process [GO:0016998 biological_process] (2)                                                          | Myb-like domain [IPR017877] (2); Homeobox domain-like [IPR009057] (1); Homeobox domain-like [IPR009057] (1)                                                                                                                                                                                                                                                                                                                                             | scaffold_3_mRNA_4396.1<br>scaffold_3_mRNA_4392.1 | C_unshiu_02214_mRNA_1.1<br>C_unshiu_00054_mRNA_31.1                                                      | -                               |
| GF0021473 | 1                               | 1                          | 0                            | Hypothetical protein (2)                  | DNA binding [GO:0003677 molecular_function] (2)                                                                                                                                                                                                                                                                             | P-loop containing nucleoside triphosphate hydrolase [IPR027417] (1); NB-ARC [IPR02182] (1); Leucine-rich repeat domain, L domain-like [IPR032675] (1)                                                                                                                                                                                                                                                                                                   | scaffold_3_mRNA_4385.1                           | C_unshiu_00054_mRNA_38.1                                                                                 | -                               |
| GF0021468 | 1                               | 1                          | 0                            | Hypothetical protein (2)                  | ADP binding [GO:0045351 molecular_function] (1)                                                                                                                                                                                                                                                                             | Protein kinase domain [IPR000719] (2); Protein kinase-like domain [IPR011099] (2)                                                                                                                                                                                                                                                                                                                                                                       | scaffold_3_mRNA_4382.1                           | C_unshiu_00054_mRNA_40.1                                                                                 | -                               |
| GF0021466 | 1                               | 1                          | 0                            | Hypothetical protein (2)                  | protein kinase activity [GO:0004672 molecular_function] (2); protein phosphorylation [GO:0006468 biological_process] (2); ATP binding [GO:0005524 molecular_function] (2)                                                                                                                                                   | PPM-type phosphatase, divalent cation binding [IPR000222] (2); Protein phosphatase 2C family [IPR015655] (2); PPM-type phosphatase domain [IPR001932] (2)                                                                                                                                                                                                                                                                                               | scaffold_3_mRNA_4352.1                           | C_unshiu_02225_mRNA_3.1                                                                                  | -                               |
| GF0021465 | 1                               | 1                          | 0                            | Hypothetical protein (2)                  | protein serine/threonine phosphatase activity [GO:0004722 molecular_function] (2); protein dephosphorylation [GO:0006470 biological_process] (2); cation binding [GO:0043169 molecular_function] (2); catalytic activity [GO:0003824 molecular_function] (2)                                                                | Protein of unknown function DUF247, plant [IPR004158] (2);<br>Ribonuclease H-like domain [IPR012337] (1)                                                                                                                                                                                                                                                                                                                                                | scaffold_3_mRNA_4345.1<br>scaffold_3_mRNA_4339.1 | C_unshiu_00528_mRNA_23.1<br>C_unshiu_01712_mRNA_4.1                                                      | -                               |
| GF0021462 | 1                               | 1                          | 0                            | Hypothetical protein (2)                  | nucleic acid binding [GO:0003676 molecular_function] (1)                                                                                                                                                                                                                                                                    | C2 domain [IPR000006] (2); Domain of unknown function DUF4782 [IPR031968] (1); VASS domain [IPR031968] (1)                                                                                                                                                                                                                                                                                                                                              | scaffold_3_mRNA_4333.1                           | C_unshiu_00528_mRNA_6.1                                                                                  | -                               |
| GF0021461 | 1                               | 1                          | 0                            | Hypothetical protein (2)                  | transcription, DNA-templated [GO:0006351 biological_process] (2); nucleus [GO:0005634 cellular_component] (2); zinc ion binding [GO:0008270 molecular_function] (1); DNA binding [GO:0003677 molecular_function] (1)                                                                                                        | Transcription factor IIS, N-terminal [IPR01923] (2); Transcription elongation factor S-II, central domain [IPR003618] (2); Transcription elongation factor, TFIIS/CRSP70, N-terminal, sub-type [IPR00307] (2); Transcription elongation factor S-III [IPR017890] (1)                                                                                                                                                                                    | scaffold_3_mRNA_4326.1                           | C_unshiu_01481_mRNA_5.1                                                                                  | -                               |
| GF0021460 | 1                               | 1                          | 0                            | Hypothetical protein (2)                  | F-box/RN1-like superfamily protein 0 isoform 1 (1); F-box/RN1-like superfamily protein isoform 2 (1)                                                                                                                                                                                                                        | F-box domain [IPR001810] (2); Leucine-rich repeat domain, L domain-like [IPR032675] (2)                                                                                                                                                                                                                                                                                                                                                                 | scaffold_3_mRNA_4324.1<br>scaffold_3_mRNA_4323.1 | C_unshiu_00528_mRNA_2.1<br>C_unshiu_01481_mRNA_2.1                                                       | -                               |
| GF0021457 | 1                               | 1                          | 0                            | Hypothetical protein (2)                  | transcription elongation factor $\kappa$ -II putative (2)                                                                                                                                                                                                                                                                   | Leucine-rich repeat domain, L domain-like [IPR032675] (2)                                                                                                                                                                                                                                                                                                                                                                                               | scaffold_3_mRNA_4320.1                           | C_unshiu_00902_mRNA_9.1<br>C_unshiu_00902_mRNA_5.1                                                       | -                               |
| GF0021456 | 1                               | 1                          | 0                            | Hypothetical protein (2)                  | transport [GO:0006810 biological_process] (2); intracellular [GO:0005622 cellular_component] (2); ER to Golgi vesicle-mediated transport [GO:0006888 biological_process] (2)                                                                                                                                                | Longin-like domain [IPR011012] (2); Trafficking protein particle complex subunit 2 [IPR006722] (2)                                                                                                                                                                                                                                                                                                                                                      | scaffold_3_mRNA_4310.1                           | C_unshiu_00712_mRNA_6.1                                                                                  | -                               |
| GF0021455 | 1                               | 1                          | 0                            | Hypothetical protein (2)                  | transcription elongation factor $\kappa$ -II putative (2)                                                                                                                                                                                                                                                                   | transcription elongation factor $\kappa$ -II putative [IPR003618] (2); Transcription elongation factor, TFIIS/CRSP70, N-terminal, sub-type [IPR00307] (2); Transcription elongation factor S-III [IPR017890] (1)                                                                                                                                                                                                                                        | scaffold_3_mRNA_4308.1<br>scaffold_3_mRNA_4305.1 | C_unshiu_01667_mRNA_3.1<br>C_unshiu_00651_mRNA_8.1                                                       | -                               |
| GF0021452 | 1                               | 1                          | 0                            | Hypothetical protein (2)                  | binding [GO:0005488 molecular_function] (1)                                                                                                                                                                                                                                                                                 | Armadillo-like helical [IPR019899] (1); Armadillo-type fold [IPR016024] (1)                                                                                                                                                                                                                                                                                                                                                                             | scaffold_3_mRNA_4297.1                           | C_unshiu_00712_mRNA_8.1                                                                                  | -                               |
| GF0021450 | 1                               | 1                          | 0                            | Hypothetical protein (2)                  | Plastive Zea mays retrotransposon Optic-2 (1); SLG1-Sc and SLA1-Sc genes and Melnoth retrotransposon sequence (1)                                                                                                                                                                                                           | Reverse transcriptase, RNA-dependent DNA polymerase [IPR031103] (1)                                                                                                                                                                                                                                                                                                                                                                                     | scaffold_3_mRNA_4292.1                           | C_unshiu_01158_mRNA_2.1                                                                                  | -                               |
| GF0021449 | 1                               | 1                          | 0                            | Hypothetical protein (2)                  | transcription elongation factor $\kappa$ -II putative (2)                                                                                                                                                                                                                                                                   | Retrotransposon gag domain [IPR005162] (2)                                                                                                                                                                                                                                                                                                                                                                                                              | scaffold_3_mRNA_4286.1                           | C_unshiu_01093_mRNA_6.1                                                                                  | -                               |
| GF0021448 | 1                               | 1                          | 0                            | Hypothetical protein (2)                  | ATP binding [GO:0005524 molecular_function] (1)                                                                                                                                                                                                                                                                             | Malexin [IPR021720] (2); Concavalin A-like lectin/glucanase domain [IPR013320] (1); Protein kinase-like domain [IPR01009] (1); Protein kinase, ATP binding site [IPR017441] (1)                                                                                                                                                                                                                                                                         | scaffold_3_mRNA_4278.1<br>scaffold_3_mRNA_4272.1 | C_unshiu_00518_mRNA_10.1<br>C_unshiu_00180_mRNA_5.1                                                      | -                               |
| GF0021447 | 1                               | 1                          | 0                            | Hypothetical protein (2)                  | transcription coactivator activity [GO:0003713 molecular_function] (2); regulation of transcription, DNA-templated [GO:0006355 biological_process] (2)                                                                                                                                                                      | Associate of Myc 1 [IPR026060] (2)                                                                                                                                                                                                                                                                                                                                                                                                                      | scaffold_3_mRNA_4248.1                           | C_unshiu_00174_mRNA_3.1                                                                                  | -                               |
| GF0021446 | 1                               | 1                          | 0                            | Hypothetical protein (2)                  | transcription elongation factor $\kappa$ -II putative (2)                                                                                                                                                                                                                                                                   | Reverse transcriptase domain [IPR000477] (2); Endonuclease/exonuclease/phosphatase [IPR005155] (1)                                                                                                                                                                                                                                                                                                                                                      | scaffold_3_mRNA_4232.1<br>scaffold_3_mRNA_4216.1 | C_unshiu_00672_mRNA_17.1<br>C_unshiu_00232_mRNA_20.1                                                     | -                               |
| GF0021444 | 1                               | 1                          | 0                            | Hypothetical protein (2)                  | RNA-directed DNA polymerase (Reverse transcriptase) (2)                                                                                                                                                                                                                                                                     | Domain of unknown function DUF4283 [IPR025558] (2); Reverse transcriptase domain [IPR000477] (1)                                                                                                                                                                                                                                                                                                                                                        | scaffold_3_mRNA_4175.1                           | C_unshiu_01551_mRNA_6.1<br>C_unshiu_00514_mRNA_2.1<br>C_unshiu_01953_mRNA_3.1<br>C_unshiu_00392_mRNA_8.1 | -                               |
| GF0021443 | 1                               | 1                          | 0                            | Hypothetical protein (2)                  | transcription elongation factor $\kappa$ -II putative (2)                                                                                                                                                                                                                                                                   | Zinc knuckle CX2CX4HX4C [IPR025836] (2)                                                                                                                                                                                                                                                                                                                                                                                                                 | scaffold_3_mRNA_4172.1<br>scaffold_3_mRNA_4139.1 | C_unshiu_00669_mRNA_15.1<br>C_unshiu_00080_mRNA_14.1                                                     | -                               |
| GF0021433 | 1                               | 1                          | 0                            | Hypothetical protein (2)                  | Similarity to non-LTR retroelement reverse transcriptase (2)                                                                                                                                                                                                                                                                | Diphthine- $\alpha$ -mannan ligase/Uncharacterised protein M0570 [IPR030662] (2); Diphthamide synthase domain [IPR02761] (2); Yagf/YER057c/UK114 family [IPR006175] (2); Rossmann-like alpha/beta/alpha sandwich fold [IPR014729] (2); Endoribonuclease L-1 PSP-chromatin esterase-like [IPR013813] (2)                                                                                                                                                 | scaffold_3_mRNA_4138.1                           | C_unshiu_00080_mRNA_12.1                                                                                 | -                               |
| GF0021432 | 1                               | 1                          | 0                            | Hypothetical protein (2)                  | transcription elongation factor $\kappa$ -II putative (2)                                                                                                                                                                                                                                                                   | Diphthine- $\alpha$ -mannan ligase/Uncharacterised protein M0570 [IPR030662] (2); Diphthamide synthase domain [IPR02761] (2); Yagf/YER057c/UK114 family [IPR006175] (2); Rossmann-like alpha/beta/alpha sandwich fold [IPR014729] (2); Endoribonuclease L-1 PSP-chromatin esterase-like [IPR013813] (2)                                                                                                                                                 | scaffold_3_mRNA_4134.1                           | C_unshiu_00080_mRNA_8.1                                                                                  | -                               |
| GF0021430 | 1                               | 1                          | 0                            | Hypothetical protein (2)                  | transcription elongation factor $\kappa$ -II putative (2)                                                                                                                                                                                                                                                                   | Diphthine- $\alpha$ -mannan ligase/Uncharacterised protein M0570 [IPR030662] (2); Diphthamide synthase domain [IPR02761] (2); Yagf/YER057c/UK114 family [IPR006175] (2); Rossmann-like alpha/beta/alpha sandwich fold [IPR014729] (2); Endoribonuclease L-1 PSP-chromatin esterase-like [IPR013813] (2)                                                                                                                                                 | scaffold_3_mRNA_4134.1                           | C_unshiu_00080_mRNA_8.1                                                                                  | -                               |
| GF0021429 | 1                               | 1                          | 0                            | Hypothetical protein (2)                  | transcription elongation factor $\kappa$ -II putative (2)                                                                                                                                                                                                                                                                   | Diphthine- $\alpha$ -mannan ligase/Uncharacterised protein M0570 [IPR030662] (2); Diphthamide synthase domain [IPR02761] (2); Yagf/YER057c/UK114 family [IPR006175] (2); Rossmann-like alpha/beta/alpha sandwich fold [IPR014729] (2); Endoribonuclease L-1 PSP-chromatin esterase-like [IPR013813] (2)                                                                                                                                                 | scaffold_3_mRNA_4134.1                           | C_unshiu_00080_mRNA_8.1                                                                                  | -                               |
| GF0021428 | 1                               | 1                          | 0                            | Hypothetical protein (2)                  | transcription elongation factor $\kappa$ -II putative (2)                                                                                                                                                                                                                                                                   | Diphthine- $\alpha$ -mannan ligase/Uncharacterised protein M0570 [IPR030662] (2); Diphthamide synthase domain [IPR02761] (2); Yagf/YER057c/UK114 family [IPR006175] (2); Rossmann-like alpha/beta/alpha sandwich fold [IPR014729] (2); Endoribonuclease L-1 PSP-chromatin esterase-like [IPR013813] (2)                                                                                                                                                 | scaffold_3_mRNA_4134.1                           | C_unshiu_00080_mRNA_8.1                                                                                  | -                               |

| ID        | Num. in <i>C. clementiae</i> | Num. in <i>C. acutis</i> | Num. in <i>P. trifoliata</i> | Note                                                                                                                                                                                                                                                | GO                                                                                                                                                                                                                                            | InterPro                                                                                                                                                                                                                                                                                                                                                                           | Members in <i>C. clementiae</i> | Members in <i>C. acutis</i> | Members in <i>P. trifoliata</i> |
|-----------|------------------------------|--------------------------|------------------------------|-----------------------------------------------------------------------------------------------------------------------------------------------------------------------------------------------------------------------------------------------------|-----------------------------------------------------------------------------------------------------------------------------------------------------------------------------------------------------------------------------------------------|------------------------------------------------------------------------------------------------------------------------------------------------------------------------------------------------------------------------------------------------------------------------------------------------------------------------------------------------------------------------------------|---------------------------------|-----------------------------|---------------------------------|
| GF0021427 | 1                            | 1                        | 0                            | Hypothetical protein (2)                                                                                                                                                                                                                            | proteolysis [GO:0006508 biological_process] (2); aspartic-type endopeptidase activity [GO:0004190 molecular_function] (2)                                                                                                                     | Aspartic peptidase domain [IPRO21109] (2); Aspartic peptidase, active site [IPRO01969] (2)                                                                                                                                                                                                                                                                                         | scaffold_3_mRNA_4131.1          | C_unshiu_00080_mRNA_5.1     | -                               |
| GF0021426 | 1                            | 1                        | 0                            | Hypothetical protein (2)                                                                                                                                                                                                                            |                                                                                                                                                                                                                                               | Protein kinase-like domain [IPRO11009] (2); Protein kinase domain [IPRO00719] (2); Serine/threonine-protein kinase, active site [IPRO08271] (2); Serine/threonine/tyrosine-protein kinase catalytic domain [IPRO01245] (1); Serine/threonine/tyrosine-protein kinase, catalytic domain [IPRO01245] (1); Serine/threonine-specific protein kinase, catalytic domain [IPRO02290] (1) | scaffold_3_mRNA_4124.1          | C_unshiu_00767_mRNA_6.1     | -                               |
| GF0021425 | 1                            | 1                        | 0                            | Cysteine-rich RLK 29 isoform 1 (2)                                                                                                                                                                                                                  | protein kinase activity [GO:0004672 molecular_function] (2); protein phosphorylation [GO:0006468 biological_process] (2); ATP binding [GO:0005524 molecular_function] (2)                                                                     |                                                                                                                                                                                                                                                                                                                                                                                    | scaffold_3_mRNA_4123.1          | C_unshiu_00767_mRNA_7.1     | -                               |
| GF0021423 | 1                            | 1                        | 0                            | Hypothetical protein (2)                                                                                                                                                                                                                            |                                                                                                                                                                                                                                               |                                                                                                                                                                                                                                                                                                                                                                                    | scaffold_3_mRNA_4118.1          | C_unshiu_00767_mRNA_12.1    | -                               |
| GF0021421 | 1                            | 1                        | 0                            | Copper-binding periplasmic protein (2)                                                                                                                                                                                                              |                                                                                                                                                                                                                                               | Zinc finger, RING-type [IPRO01841] (2); Zinc finger, CHY-type [IPRO08913] (2); Haemerythrin-like [IPRO12312] (2); Zinc finger, C1CHY-type [IPRO17921] (2); Zinc finger, RINGFYVE/PHD-type [IPRO13083] (2); Rubredoxin-type fold [IPRO04039] (1)                                                                                                                                    | scaffold_3_mRNA_4101.1          | C_unshiu_01155_mRNA_2.1     | -                               |
| GF0021420 | 1                            | 1                        | 0                            | Zinc finger protein-related isoform 1 (2)                                                                                                                                                                                                           | zinc ion binding [GO:0008270 molecular_function] (2); protein binding [GO:0005515 molecular_function] (2)                                                                                                                                     |                                                                                                                                                                                                                                                                                                                                                                                    | scaffold_3_mRNA_4100.1          | C_unshiu_01155_mRNA_3.1     | -                               |
| GF0021419 | 1                            | 1                        | 0                            | Core-2-beta branching beta-1,6-N-acetylglucosaminyltransferase family protein (2)                                                                                                                                                                   | Core-2-beta branching beta-1,6-N-acetylglucosaminyltransferase activity [GO:0008375 molecular_function] (2); membrane [GO:0016020 cellular_component] (2)                                                                                     | Glycosyl transferase, family 14 [IPRO03406] (2)                                                                                                                                                                                                                                                                                                                                    | scaffold_3_mRNA_4098.1          | C_unshiu_01155_mRNA_6.1     | -                               |
| GF0021418 | 1                            | 1                        | 0                            | Hypothetical protein (2)                                                                                                                                                                                                                            | metabolic process [GO:0008152 biological_process] (2); lyase activity [GO:0016829 molecular_function] (2); terpene synthase activity [GO:0010333 molecular_function] (2); magnesium ion binding [GO:0000287 molecular_function] (2)           | Isoprenoid synthase domain [IPRO08949] (2); Terpene synthase, metal-binding domain [IPRO05630] (2); Terpene synthase, N-terminal domain [IPRO01906] (2); Terpenoid cyclases/protein prenyltransferase alpha-alpha toroid [IPRO08930] (2)                                                                                                                                           | scaffold_3_mRNA_4087.1          | C_unshiu_01457_mRNA_3.1     | -                               |
| GF0021416 | 1                            | 1                        | 0                            | Sesquiterpene synthase (2)                                                                                                                                                                                                                          |                                                                                                                                                                                                                                               |                                                                                                                                                                                                                                                                                                                                                                                    | scaffold_3_mRNA_4076.1          | C_unshiu_01640_mRNA_2.1     | -                               |
| GF0021415 | 1                            | 1                        | 0                            | Hypothetical protein (2)                                                                                                                                                                                                                            |                                                                                                                                                                                                                                               |                                                                                                                                                                                                                                                                                                                                                                                    | scaffold_3_mRNA_4073.1          | C_unshiu_01640_mRNA_5.1     | -                               |
| GF0021414 | 1                            | 1                        | 0                            | Uncharacterized mitochondrial protein AMg00310 (2)                                                                                                                                                                                                  |                                                                                                                                                                                                                                               |                                                                                                                                                                                                                                                                                                                                                                                    | scaffold_3_mRNA_4070.1          | C_unshiu_00563_mRNA_20.1    | -                               |
| GF0021412 | 1                            | 1                        | 0                            | Leucine-rich repeat protein kinase family protein (1); Receptor like protein 33 (1) (2)                                                                                                                                                             | protein binding [GO:0005515 molecular_function] (2)                                                                                                                                                                                           | Leucine-rich repeat domain, L domain-like [IPRO32675] (2); Leucine-rich repeat [IPRO01611] (2); Leucine-rich repeat-containing N-terminal, plant-type [IPRO13210] (2); Leucine-rich repeat, typical subtype [IPRO03591] (1)                                                                                                                                                        | scaffold_3_mRNA_4048.1          | C_unshiu_01491_mRNA_2.1     | -                               |
| GF0021411 | 1                            | 1                        | 0                            | Hypothetical protein (2)                                                                                                                                                                                                                            |                                                                                                                                                                                                                                               | Class I glutamine amidotransferase-like [IPRO29062] (2); DJ-1/Pip1 [IPRO02818] (2)                                                                                                                                                                                                                                                                                                 | scaffold_3_mRNA_4047.1          | C_unshiu_01491_mRNA_3.1     | -                               |
| GF0021410 | 1                            | 1                        | 0                            | Hypothetical protein (2)                                                                                                                                                                                                                            |                                                                                                                                                                                                                                               | Protein kinase-like domain [IPRO11009] (2)                                                                                                                                                                                                                                                                                                                                         | scaffold_3_mRNA_4036.1          | C_unshiu_02077_mRNA_4.1     | -                               |
| GF0021409 | 1                            | 1                        | 0                            | Hypothetical protein (1); Class I glutamine amidotransferase-like superfamily protein isoform 2 (1)                                                                                                                                                 | ribosome [GO:0005840 cellular_component] (1); intracellular [GO:0005622 cellular_component] (1); translation [GO:0006412 biological_process] (1); structural constituent of ribosome [GO:0003735 molecular_function] (1)                      | Class I glutamine amidotransferase-like [IPRO29062] (2); Ribosomal protein L9, N-terminal [IPRO02070] (2); Ribosomal protein L9/RNase H1, N-terminal [IPRO09027] (2); DJ-1/Pip1 [IPRO02818] (2); Ribosomal protein L9 [IPRO00244] (1)                                                                                                                                              | scaffold_3_mRNA_4021.1          | C_unshiu_02049_mRNA_5.1     | -                               |
| GF0021406 | 1                            | 1                        | 0                            | RNA-directed DNA polymerase, related (2)                                                                                                                                                                                                            |                                                                                                                                                                                                                                               | Reverse transcriptase domain [IPRO00477] (2)                                                                                                                                                                                                                                                                                                                                       | scaffold_3_mRNA_4.1             | C_unshiu_01604_mRNA_4.1     | -                               |
| GF0021405 | 1                            | 1                        | 0                            | Epidermis-specific secreted glycoprotein EPI (2)                                                                                                                                                                                                    |                                                                                                                                                                                                                                               | Bull-type lectin domain [IPRO01480] (2)                                                                                                                                                                                                                                                                                                                                            | scaffold_3_mRNA_3966.1          | C_unshiu_02596_mRNA_2.1     | -                               |
| GF0021404 | 1                            | 1                        | 0                            | Alpha-N-acetylglucosaminidase family / NAGLU family isoform 1 (2)                                                                                                                                                                                   |                                                                                                                                                                                                                                               | Alpha-N-acetylglucosaminidase, N-terminal [IPRO24240] (2); Alpha-N-acetylglucosaminidase, im-barrel domain [IPRO04733] (2); Alpha-N-acetylglucosaminidase, C-terminal [IPRO24732] (2); Alpha-N-acetylglucosaminidase [IPRO07781] (2)                                                                                                                                               | scaffold_3_mRNA_396.1           | C_unshiu_00092_mRNA_23.1    | -                               |
| GF0021401 | 1                            | 1                        | 0                            | Glycosyl transferase family 1 family protein (1); UDP-Glycosyltransferase superfamily protein isoform 3 (1)                                                                                                                                         |                                                                                                                                                                                                                                               | Glycosyl transferase, family 1 [IPRO01296] (2)                                                                                                                                                                                                                                                                                                                                     | scaffold_3_mRNA_3942.1          | C_unshiu_00769_mRNA_1.1     | -                               |
| GF0021400 | 1                            | 1                        | 0                            | Hypothetical protein (2)                                                                                                                                                                                                                            |                                                                                                                                                                                                                                               | Glycosyl transferase, family 1 [IPRO01296] (2)                                                                                                                                                                                                                                                                                                                                     | scaffold_3_mRNA_3932.1          | C_unshiu_01431_mRNA_1.1     | -                               |
| GF0021399 | 1                            | 1                        | 0                            | Hypothetical protein (2)                                                                                                                                                                                                                            |                                                                                                                                                                                                                                               |                                                                                                                                                                                                                                                                                                                                                                                    | scaffold_3_mRNA_3921.1          | C_unshiu_01537_mRNA_8.1     | -                               |
| GF0021397 | 1                            | 1                        | 0                            | Hypothetical protein (1); Anaphase-promoting complex subunit 6 (1)                                                                                                                                                                                  | protein binding [GO:0005515 molecular_function] (2); cysteine-type peptidase activity [GO:0008234 molecular_function] (1); proteolysis [GO:0006508 biological_process] (1)                                                                    | Tetratricopeptide-like helical domain [IPRO11990] (2); Ulp1 protease family, C-terminal catalytic domain [IPRO03653] (1)                                                                                                                                                                                                                                                           | scaffold_3_mRNA_3912.1          | C_unshiu_01537_mRNA_5.1     | -                               |
| GF0021396 | 1                            | 1                        | 0                            | Ankyrin repeat protein, putative (2)                                                                                                                                                                                                                | protein binding [GO:0005515 molecular_function] (2)                                                                                                                                                                                           | Ankyrin repeat-containing domain [IPRO20683] (2); Ankyrin repeat [IPRO02110] (2)                                                                                                                                                                                                                                                                                                   | scaffold_3_mRNA_3911.1          | C_unshiu_02956_mRNA_3.1     | -                               |
| GF0021395 | 1                            | 1                        | 0                            | Hypothetical protein (2)                                                                                                                                                                                                                            |                                                                                                                                                                                                                                               | Powdery mildew resistance protein, RPWS domain [IPRO08808] (2)                                                                                                                                                                                                                                                                                                                     | scaffold_3_mRNA_3899.1          | C_unshiu_00438_mRNA_15.1    | -                               |
| GF0021394 | 1                            | 1                        | 0                            | Hypothetical protein (2)                                                                                                                                                                                                                            |                                                                                                                                                                                                                                               | Powdery mildew resistance protein, RPWS domain [IPRO08808] (2)                                                                                                                                                                                                                                                                                                                     | scaffold_3_mRNA_3898.1          | C_unshiu_00438_mRNA_14.1    | -                               |
| GF0021393 | 1                            | 1                        | 0                            | Hypothetical protein (2)                                                                                                                                                                                                                            |                                                                                                                                                                                                                                               | Powdery mildew resistance protein, RPWS domain [IPRO08808] (1)                                                                                                                                                                                                                                                                                                                     | scaffold_3_mRNA_3894.1          | C_unshiu_00438_mRNA_8.1     | -                               |
| GF0021392 | 1                            | 1                        | 0                            | renatropoepoese reeas-containing protein, mitochondrial (1); Pentatricopeptide (PPR) repeat protein (1); Pentatricopeptide repeat-containing protein, mitochondrial (1); Pentatricopeptide repeat (PPR) superfamily protein, putative isoform 2 (1) |                                                                                                                                                                                                                                               | Pentatricopeptide repeat [IPRO02885] (2)                                                                                                                                                                                                                                                                                                                                           | scaffold_3_mRNA_3892.1          | C_unshiu_00438_mRNA_11.1    | -                               |
| GF0021391 | 1                            | 1                        | 0                            | Hypothetical protein (1); Pentatricopeptide repeat (PPR) superfamily protein, putative isoform 2 (1)                                                                                                                                                |                                                                                                                                                                                                                                               | Pentatricopeptide repeat [IPRO02885] (2)                                                                                                                                                                                                                                                                                                                                           | scaffold_3_mRNA_3890.1          | C_unshiu_00438_mRNA_6.1     | -                               |
| GF0021389 | 1                            | 1                        | 0                            | Hypothetical protein (2)                                                                                                                                                                                                                            |                                                                                                                                                                                                                                               | SGNH hydrolase-type esterase domain [IPRO13830] (1)                                                                                                                                                                                                                                                                                                                                | scaffold_3_mRNA_3883.1          | C_unshiu_00072_mRNA_34.1    | -                               |
| GF0021388 | 1                            | 1                        | 0                            | Mutator-like transposase (2)                                                                                                                                                                                                                        |                                                                                                                                                                                                                                               | Transposase, MuDR, plant [IPRO04332] (2); MULE transposase domain [IPRO18299] (2)                                                                                                                                                                                                                                                                                                  | scaffold_3_mRNA_3865.1          | C_unshiu_01504_mRNA_5.1     | -                               |
| GF0021387 | 1                            | 1                        | 0                            | Hypothetical protein (2)                                                                                                                                                                                                                            | DNA binding [GO:0003677 molecular_function] (1)                                                                                                                                                                                               | Myb domain [IPRO17930] (2); Homeodomain-like [IPRO09057] (1)                                                                                                                                                                                                                                                                                                                       | scaffold_3_mRNA_3857.1          | C_unshiu_01069_mRNA_4.1     | -                               |
| GF0021386 | 1                            | 1                        | 0                            | Hypothetical protein (2)                                                                                                                                                                                                                            |                                                                                                                                                                                                                                               |                                                                                                                                                                                                                                                                                                                                                                                    | scaffold_3_mRNA_3855.1          | C_unshiu_01557_mRNA_2.1     | -                               |
| GF0021384 | 1                            | 1                        | 0                            | HAT dimerisation (1); Hypothetical protein (1)                                                                                                                                                                                                      | protein dimerization activity [GO:0046983 molecular_function] (2); nucleic acid binding [GO:0003676 molecular_function] (2)                                                                                                                   | Ribonuclease H-like domain [IPRO12373] (2); HAT, C-terminal dimerisation domain [IPRO08906] (2)                                                                                                                                                                                                                                                                                    | scaffold_3_mRNA_3842.1          | C_unshiu_00095_mRNA_15.1    | -                               |
| GF0021383 | 1                            | 1                        | 0                            | Hypothetical protein (2)                                                                                                                                                                                                                            | protein binding [GO:0005515 molecular_function] (2)                                                                                                                                                                                           | Leucine-rich repeat [IPRO01611] (2); Leucine-rich repeat domain, L domain-like [IPRO32675] (2)                                                                                                                                                                                                                                                                                     | scaffold_3_mRNA_3827.1          | C_unshiu_00534_mRNA_12.1    | -                               |
| GF0021380 | 1                            | 1                        | 0                            | Glycerol kinase (2)                                                                                                                                                                                                                                 | carbohydrate metabolic process [GO:0005975 biological_process] (2); phosphotransferase activity, alcohol group as acceptor [GO:0016773 molecular_function] (2)                                                                                | Carbohydrate kinase, FGGY, C-terminal [IPRO18485] (2); Carbohydrate kinase, FGGY, N-terminal [IPRO18484] (2)                                                                                                                                                                                                                                                                       | scaffold_3_mRNA_3822.1          | C_unshiu_01142_mRNA_8.1     | -                               |
| GF0021379 | 1                            | 1                        | 0                            | Miraculin (1); Kunitz trypsin inhibitor (1)                                                                                                                                                                                                         | endopeptidase inhibitor activity [GO:0004866 molecular_function] (2)                                                                                                                                                                          | Proteinase inhibitor I3, Kunitz legume [IPRO02160] (2); Kunitz inhibitor ST1-like [IPRO11065] (2)                                                                                                                                                                                                                                                                                  | scaffold_3_mRNA_3820.1          | C_unshiu_01142_mRNA_10.1    | -                               |
| GF0021377 | 1                            | 1                        | 0                            | Hypothetical protein (2)                                                                                                                                                                                                                            |                                                                                                                                                                                                                                               | Translation protein SH3-like domain [IPRO08991] (1); Ribosomal protein L2 domain 2 [IPRO14722] (1)                                                                                                                                                                                                                                                                                 | scaffold_3_mRNA_3803.1          | C_unshiu_00688_mRNA_16.1    | -                               |
| GF0021376 | 1                            | 1                        | 0                            | Hypothetical protein (2)                                                                                                                                                                                                                            |                                                                                                                                                                                                                                               |                                                                                                                                                                                                                                                                                                                                                                                    | scaffold_3_mRNA_380.1           | C_unshiu_00092_mRNA_6.1     | -                               |
| GF0021374 | 1                            | 1                        | 0                            | Gamma-glutamyl hydrolase (2)                                                                                                                                                                                                                        | glutamine metabolic process [GO:0006541 biological_process] (2); omega peptidase activity [GO:0008242 molecular_function] (2); hydrolase activity [GO:0016787 molecular_function] (2); catalytic activity [GO:0003824 molecular_function] (2) | Class I glutamine amidotransferase-like [IPRO29062] (2); Peptidase C26 [IPRO11697] (2); Peptidase C26, gamma-glutamyl hydrolase [IPRO15527] (2)                                                                                                                                                                                                                                    | scaffold_3_mRNA_3771.1          | C_unshiu_00836_mRNA_8.1     | -                               |
| GF0021373 | 1                            | 1                        | 0                            | Hypothetical protein (2)                                                                                                                                                                                                                            | nucleic acid binding [GO:0003676 molecular_function] (2); nucleotide binding [GO:0000166 molecular_function] (1)                                                                                                                              | RNA recognition motif domain [IPRO00504] (2); Nucleotide-binding alpha-beta plat domain [IPRO12677] (1)                                                                                                                                                                                                                                                                            | scaffold_3_mRNA_3766.1          | C_unshiu_00730_mRNA_4.1     | -                               |
| GF0021372 | 1                            | 1                        | 0                            | Hypothetical protein (2)                                                                                                                                                                                                                            | nucleic acid binding [GO:0003676 molecular_function] (2)                                                                                                                                                                                      | Ribonuclease H-like domain [IPRO12373] (2)                                                                                                                                                                                                                                                                                                                                         | scaffold_3_mRNA_3752.1          | C_unshiu_00174_mRNA_19.1    | -                               |
| GF0021371 | 1                            | 1                        | 0                            | Protein trichome birefringence-like 38 (2)                                                                                                                                                                                                          |                                                                                                                                                                                                                                               | Trichome birefringence-like family [IPRO29962] (2); PMRS N-terminal domain [IPRO25846] (2); PC-Esterase [IPRO26057] (2)                                                                                                                                                                                                                                                            | scaffold_3_mRNA_3746.1          | C_unshiu_00705_mRNA_8.1     | -                               |
| GF0021370 | 1                            | 1                        | 0                            | Protein trichome birefringence-like 38 (1); Trichome birefringence-like protein (1)                                                                                                                                                                 |                                                                                                                                                                                                                                               | PC-Esterase [IPRO26057] (2); Trichome birefringence-like family [IPRO29962] (2); PMRS N-terminal domain [IPRO25846] (2)                                                                                                                                                                                                                                                            | scaffold_3_mRNA_3744.1          | C_unshiu_00705_mRNA_12.1    | -                               |
| GF0021368 | 1                            | 1                        | 0                            | Hypothetical protein (1); Putative pentatricopeptide repeat-containing protein, mitochondrial (1)                                                                                                                                                   |                                                                                                                                                                                                                                               | Pentatricopeptide repeat [IPRO02885] (1)                                                                                                                                                                                                                                                                                                                                           | scaffold_3_mRNA_3720.1          | C_unshiu_01537_mRNA_5.1     | -                               |
| GF0021367 | 1                            | 1                        | 0                            | Hypothetical protein (2)                                                                                                                                                                                                                            |                                                                                                                                                                                                                                               | 5-formyltetrahydrofolate cyclo-ligase [IPRO26098] (2); 5-formyltetrahydrofolate cyclo-ligase-like domain [IPRO24185] (1)                                                                                                                                                                                                                                                           | scaffold_3_mRNA_372.1           | C_unshiu_01592_mRNA_5.1     | -                               |





| ID        | Num. in <i>C. caryophyllata</i> | Num. in <i>C. acutis</i> | Num. in <i>P. trifoliata</i> | Note                                                                                                      | GO                                                                                                                                                                                                                                                                                               | InterPro                                                                                                                                                                                                                                                                                                                                                                                                                                                                  | Members in <i>C. caryophyllata</i>                                     | Members in <i>C. acutis</i> | Members in <i>P. trifoliata</i> |   |
|-----------|---------------------------------|--------------------------|------------------------------|-----------------------------------------------------------------------------------------------------------|--------------------------------------------------------------------------------------------------------------------------------------------------------------------------------------------------------------------------------------------------------------------------------------------------|---------------------------------------------------------------------------------------------------------------------------------------------------------------------------------------------------------------------------------------------------------------------------------------------------------------------------------------------------------------------------------------------------------------------------------------------------------------------------|------------------------------------------------------------------------|-----------------------------|---------------------------------|---|
| GF0021233 | 1                               | 1                        | 0                            | Hypothetical protein (2)                                                                                  | phosphogluconate dehydrogenase (decarboxylating) activity [GO:00041616]<br>molecular_function (2); oxidation-reduction process [GO:0055114 biological_process] (2)<br>translational termination [GO:0006415 molecular_function] (2)                                                              | NAD(P)-binding domain [IPR016040] (2); 6-phosphogluconate dehydrogenase [IPR006183] (2); 6-phosphogluconate dehydrogenase, NADP-binding [IPR006152] (2)                                                                                                                                                                                                                                                                                                                   | scaffold_3_mRNA_2939.1                                                 | C_unshiu_01437_mRNA_5.1     | -                               |   |
| GF0021232 | 1                               | 1                        | 0                            | Hypothetical protein (1); Peptide chain release factor 2 (1)                                              | translational termination [GO:0006415 molecular_function] (2); translation release factor activity [GO:0003747 molecular_function] (2)                                                                                                                                                           | Peptide chain release factor class I class II [IPR003523] (2); Double-stranded RNA-binding domain [IPR014720] (1)                                                                                                                                                                                                                                                                                                                                                         | scaffold_3_mRNA_2933.1                                                 | C_unshiu_00231_mRNA_25.1    | -                               |   |
| GF0021231 | 1                               | 1                        | 0                            | Hypothetical protein (2)                                                                                  | AT-hook motif nuclear localized protein (1) (2)                                                                                                                                                                                                                                                  | DNA binding [GO:0003677 molecular_function] (2)<br>protein binding [GO:0005515 molecular_function] (2); signal transduction [GO:0007165 biological_process] (2)                                                                                                                                                                                                                                                                                                           | AT hook, DNA-binding motif [IPR017956] (2); PPC domain [IPR005175] (2) | scaffold_3_mRNA_2932.1      | C_unshiu_00199_mRNA_20.1        | - |
| GF0021230 | 1                               | 1                        | 0                            | Hypothetical protein (2)                                                                                  | protein binding [GO:0005515 molecular_function] (2); signal transduction [GO:0007165 biological_process] (2)                                                                                                                                                                                     | Toll interleukin-1 receptor homology (TIR) domain [IPR000157] (2)                                                                                                                                                                                                                                                                                                                                                                                                         | scaffold_3_mRNA_2927.1                                                 | C_unshiu_01001_mRNA_7.1     | -                               |   |
| GF0021228 | 1                               | 1                        | 0                            | Monosaccharide transport protein (2)                                                                      | 0                                                                                                                                                                                                                                                                                                | 0                                                                                                                                                                                                                                                                                                                                                                                                                                                                         | scaffold_3_mRNA_2921.1                                                 | C_unshiu_03103_mRNA_1.1     | -                               |   |
| GF0021226 | 1                               | 1                        | 0                            | Hypothetical protein (2)                                                                                  | 0                                                                                                                                                                                                                                                                                                | 0                                                                                                                                                                                                                                                                                                                                                                                                                                                                         | scaffold_3_mRNA_2918.1                                                 | C_unshiu_01031_mRNA_13.1    | -                               |   |
| GF0021225 | 1                               | 1                        | 0                            | Hypothetical protein (2)                                                                                  | nucleic acid binding [GO:0003676 molecular_function] (1)                                                                                                                                                                                                                                         | Ribonuclease H-like domain [IPR012337] (1)                                                                                                                                                                                                                                                                                                                                                                                                                                | scaffold_3_mRNA_2914.1                                                 | C_unshiu_01031_mRNA_9.1     | -                               |   |
| GF0021224 | 1                               | 1                        | 0                            | Hypothetical protein (2)                                                                                  | 0                                                                                                                                                                                                                                                                                                | 0                                                                                                                                                                                                                                                                                                                                                                                                                                                                         | scaffold_3_mRNA_2913.1                                                 | C_unshiu_01031_mRNA_8.1     | -                               |   |
| GF0021223 | 1                               | 1                        | 0                            | Hypothetical protein (2)                                                                                  | 0                                                                                                                                                                                                                                                                                                | 0                                                                                                                                                                                                                                                                                                                                                                                                                                                                         | scaffold_3_mRNA_291.1                                                  | C_unshiu_01144_mRNA_5.1     | -                               |   |
| GF0021222 | 1                               | 1                        | 0                            | Retrospective pol polyprotein-like (2)                                                                    | 0                                                                                                                                                                                                                                                                                                | 0                                                                                                                                                                                                                                                                                                                                                                                                                                                                         | scaffold_3_mRNA_2909.1                                                 | C_unshiu_01051_mRNA_1.1     | -                               |   |
| GF0021221 | 1                               | 1                        | 0                            | Hypothetical protein (2)                                                                                  | 0                                                                                                                                                                                                                                                                                                | 0                                                                                                                                                                                                                                                                                                                                                                                                                                                                         | scaffold_3_mRNA_2904.1                                                 | C_unshiu_01094_mRNA_15.1    | -                               |   |
| GF0021220 | 1                               | 1                        | 0                            | Hypothetical protein (2)                                                                                  | protein binding [GO:0005515 molecular_function] (2)<br>trehalose biosynthetic process [GO:0005992 biological_process] (2); catalytic activity [GO:0003824 molecular_function] (2)                                                                                                                | Leucine-rich repeat [IPR001611] (2); Leucine-rich repeat domain, L domain-like [IPR032675] (2)<br>Trehalose-phosphatase [IPR003337] (2); HAD-like domain [IPR023214] (2)                                                                                                                                                                                                                                                                                                  | scaffold_3_mRNA_2903.1                                                 | C_unshiu_01094_mRNA_14.1    | -                               |   |
| GF0021219 | 1                               | 1                        | 0                            | Hypothetical protein (2)                                                                                  | 0                                                                                                                                                                                                                                                                                                | 0                                                                                                                                                                                                                                                                                                                                                                                                                                                                         | scaffold_3_mRNA_29.1                                                   | C_unshiu_00399_mRNA_9.1     | -                               |   |
| GF0021218 | 1                               | 1                        | 0                            | Putative TIR-NBS class resistance protein (1); Hypothetical protein (1)                                   | signal transduction [GO:0007165 biological_process] (1); protein binding [GO:0005515 molecular_function] (1)                                                                                                                                                                                     | P-loop containing nucleoside triphosphate hydrolase [IPR027417] (2); Toll interleukin-1 receptor homology (TIR) domain [IPR000157] (1)                                                                                                                                                                                                                                                                                                                                    | scaffold_3_mRNA_2897.1                                                 | C_unshiu_01094_mRNA_8.1     | -                               |   |
| GF0021215 | 1                               | 1                        | 0                            | Conserved hypothetical plastid protein Yc485 (2)                                                          | ATP binding [GO:0005524 molecular_function] (2)                                                                                                                                                                                                                                                  | AAA+ ATPase domain [IPR003593] (2); P-loop containing nucleoside triphosphate hydrolase [IPR027417] (2); ATPase, AAA-type, core [IPR03959] (2)                                                                                                                                                                                                                                                                                                                            | scaffold_3_mRNA_2874.1                                                 | C_unshiu_00582_mRNA_26.1    | -                               |   |
| GF0021214 | 1                               | 1                        | 0                            | Actin-depolymerizing factor 2 (2)                                                                         | actin binding [GO:0003779 molecular_function] (2); actin filament depolymerization [GO:0030042 biological_process] (2); intracellular [GO:0005622 cellular_component] (2); actin cytoskeleton [GO:0015629 cellular_component] (2)                                                                | ADF-H/gelsolin-like domain [IPR020066] (2); Actin-depolymerizing factor homology domain [IPR002108] (2); ADF/cofilin domain [IPR017904] (1); ADF/cofilin [IPR017904] (1)                                                                                                                                                                                                                                                                                                  | scaffold_3_mRNA_287.1                                                  | C_unshiu_01144_mRNA_9.1     | -                               |   |
| GF0021213 | 1                               | 1                        | 0                            | Hypothetical protein (2)                                                                                  | ubiquitin-dependent protein catabolic process [GO:0006513 biological_process] (1); multicellular organismal development [GO:0007275 biological_process] (1); nucleus [GO:0005634 cellular_component] (1)                                                                                         | E3 ubiquitin-protein ligase SIN-like [IPR004162] (1)                                                                                                                                                                                                                                                                                                                                                                                                                      | scaffold_3_mRNA_2856.1                                                 | C_unshiu_00518_mRNA_15.1    | -                               |   |
| GF0021212 | 1                               | 1                        | 0                            | TMV resistance protein N (2)                                                                              | signal transduction [GO:0007165 biological_process] (2); ADP binding [GO:0043531 molecular_function] (2); protein binding [GO:0005515 molecular_function] (2)                                                                                                                                    | P-loop containing nucleoside triphosphate hydrolase [IPR027417] (2); AAA+ ATPase domain [IPR003593] (2); NB-ARC [IPR002182] (2); Toll interleukin-1 receptor homology (TIR) domain [IPR000157] (2); Leucine-rich repeat 3 [IPR011713] (2); Leucine-rich repeat domain, L domain-like [IPR032675] (2); Winged helix-turn-helix DNA-binding domain [IPR011991] (2)                                                                                                          | scaffold_3_mRNA_2855.1                                                 | C_unshiu_00518_mRNA_14.1    | -                               |   |
| GF0021211 | 1                               | 1                        | 0                            | Hypothetical protein (2)                                                                                  | protein binding [GO:0005515 molecular_function] (2); phosphoric ester hydrolase activity [GO:0042578 molecular_function] (2)                                                                                                                                                                     | SAC domain [IPR020213] (2); WW domain [IPR01202] (2)                                                                                                                                                                                                                                                                                                                                                                                                                      | scaffold_3_mRNA_2854.1                                                 | C_unshiu_00518_mRNA_13.1    | -                               |   |
| GF0021210 | 1                               | 1                        | 0                            | Hypothetical protein (2)                                                                                  | 0                                                                                                                                                                                                                                                                                                | 0                                                                                                                                                                                                                                                                                                                                                                                                                                                                         | scaffold_3_mRNA_2853.1                                                 | C_unshiu_00518_mRNA_12.1    | -                               |   |
| GF0021207 | 1                               | 1                        | 0                            | Hypothetical protein (2)                                                                                  | 0                                                                                                                                                                                                                                                                                                | 0                                                                                                                                                                                                                                                                                                                                                                                                                                                                         | scaffold_3_mRNA_2834.1                                                 | C_unshiu_01977_mRNA_3.1     | -                               |   |
| GF0021206 | 1                               | 1                        | 0                            | Hypothetical protein (2)                                                                                  | 0                                                                                                                                                                                                                                                                                                | 0                                                                                                                                                                                                                                                                                                                                                                                                                                                                         | scaffold_3_mRNA_2832.1                                                 | C_unshiu_00596_mRNA_9.1     | -                               |   |
| GF0021205 | 1                               | 1                        | 0                            | F-box protein SKP23 (2)                                                                                   | 0                                                                                                                                                                                                                                                                                                | 0                                                                                                                                                                                                                                                                                                                                                                                                                                                                         | scaffold_3_mRNA_2831.1                                                 | C_unshiu_00596_mRNA_10.1    | -                               |   |
| GF0021203 | 1                               | 1                        | 0                            | Hypothetical protein (2)                                                                                  | 0                                                                                                                                                                                                                                                                                                | 0                                                                                                                                                                                                                                                                                                                                                                                                                                                                         | scaffold_3_mRNA_2823.1                                                 | C_unshiu_02456_mRNA_4.1     | -                               |   |
| GF0021201 | 1                               | 1                        | 0                            | Hypothetical protein (2)                                                                                  | zinc ion binding [GO:0008270 molecular_function] (1)                                                                                                                                                                                                                                             | Transposase, MuDR, plant [IPR004332] (2); Zinc finger, PMZ-type [IPR006564] (1); Zinc finger, SWIM-type [IPR007527] (1)                                                                                                                                                                                                                                                                                                                                                   | scaffold_3_mRNA_2806.1                                                 | C_unshiu_00097_mRNA_1.1     | -                               |   |
| GF0021199 | 1                               | 1                        | 0                            | Hypothetical protein (2)                                                                                  | 0                                                                                                                                                                                                                                                                                                | 0                                                                                                                                                                                                                                                                                                                                                                                                                                                                         | scaffold_3_mRNA_2802.1                                                 | C_unshiu_01224_mRNA_5.1     | -                               |   |
| GF0021198 | 1                               | 1                        | 0                            | Hypothetical protein (2)                                                                                  | 0                                                                                                                                                                                                                                                                                                | 0                                                                                                                                                                                                                                                                                                                                                                                                                                                                         | scaffold_3_mRNA_2801.1                                                 | C_unshiu_00181_mRNA_31.1    | -                               |   |
| GF0021196 | 1                               | 1                        | 0                            | Hypothetical protein (2)                                                                                  | 0                                                                                                                                                                                                                                                                                                | 0                                                                                                                                                                                                                                                                                                                                                                                                                                                                         | scaffold_3_mRNA_2789.1                                                 | C_unshiu_00739_mRNA_13.1    | -                               |   |
| GF0021195 | 1                               | 1                        | 0                            | Hypothetical protein (2)                                                                                  | signal transduction [GO:0007165 biological_process] (2); protein binding [GO:0005515 molecular_function] (2)                                                                                                                                                                                     | Toll interleukin-1 receptor homology (TIR) domain [IPR000157] (2)                                                                                                                                                                                                                                                                                                                                                                                                         | scaffold_3_mRNA_2771.1                                                 | C_unshiu_00313_mRNA_6.1     | -                               |   |
| GF0021194 | 1                               | 1                        | 0                            | Hypothetical protein (2)                                                                                  | 0                                                                                                                                                                                                                                                                                                | 0                                                                                                                                                                                                                                                                                                                                                                                                                                                                         | scaffold_3_mRNA_2768.1                                                 | C_unshiu_00313_mRNA_3.1     | -                               |   |
| GF0021193 | 1                               | 1                        | 0                            | Hypothetical protein (2)                                                                                  | 0                                                                                                                                                                                                                                                                                                | 0                                                                                                                                                                                                                                                                                                                                                                                                                                                                         | scaffold_3_mRNA_2766.1                                                 | C_unshiu_00441_mRNA_1.1     | -                               |   |
| GF0021191 | 1                               | 1                        | 0                            | Hypothetical protein (2)                                                                                  | proteolysis [GO:0006508 biological_process] (2); cysteine-type peptidase activity [GO:0008234 molecular_function] (2)                                                                                                                                                                            | Domain of unknown function DUF1985 [IPR015410] (2); Ulp1 protease family, C-terminal catalytic domain [IPR003653] (2)                                                                                                                                                                                                                                                                                                                                                     | scaffold_3_mRNA_2758.1                                                 | C_unshiu_02474_mRNA_2.1     | -                               |   |
| GF0021190 | 1                               | 1                        | 0                            | Hypothetical protein (2)                                                                                  | nucleic acid binding [GO:0003676 molecular_function] (2)                                                                                                                                                                                                                                         | Ribonuclease H-like domain [IPR012337] (2)                                                                                                                                                                                                                                                                                                                                                                                                                                | scaffold_3_mRNA_2755.1                                                 | C_unshiu_02707_mRNA_3.1     | -                               |   |
| GF0021189 | 1                               | 1                        | 0                            | Gag protease polyprotein, putative (2)                                                                    | 0                                                                                                                                                                                                                                                                                                | 0                                                                                                                                                                                                                                                                                                                                                                                                                                                                         | scaffold_3_mRNA_2751.1                                                 | C_unshiu_00723_mRNA_10.1    | -                               |   |
| GF0021188 | 1                               | 1                        | 0                            | Tubulin beta-9 chain (1); Tubulin beta-9 chain (1)                                                        | microtubule-based process [GO:0007017 biological_process] (2); GTP binding [GO:0005525 molecular_function] (2); structural constituent of cytoskeleton [GO:0005200 molecular_function] (2); microtubule [GO:0005874 cellular_component] (2); GTPase activity [GO:0003924 molecular_function] (2) | Beta tubulin [IPR022453] (2); Tubulin, conserved site [IPR017975] (2); Tubulin/FtsZ, GTPase domain [IPR030088] (2); Beta tubulin, autoinhibition binding site [IPR013838] (2); Tubulin [IPR000217] (2); Tubulin, C-terminal [IPR023123] (1)                                                                                                                                                                                                                               | scaffold_3_mRNA_275.1                                                  | C_unshiu_01325_mRNA_6.1     | -                               |   |
| GF0021187 | 1                               | 1                        | 0                            | Hypothetical protein (2)                                                                                  | 0                                                                                                                                                                                                                                                                                                | 0                                                                                                                                                                                                                                                                                                                                                                                                                                                                         | scaffold_3_mRNA_2747.1                                                 | C_unshiu_01266_mRNA_5.1     | -                               |   |
| GF0021186 | 1                               | 1                        | 0                            | Hypothetical protein (2)                                                                                  | 0                                                                                                                                                                                                                                                                                                | 0                                                                                                                                                                                                                                                                                                                                                                                                                                                                         | scaffold_3_mRNA_2746.1                                                 | C_unshiu_00948_mRNA_2.1     | -                               |   |
| GF0021185 | 1                               | 1                        | 0                            | Hypothetical protein (2)                                                                                  | 0                                                                                                                                                                                                                                                                                                | 0                                                                                                                                                                                                                                                                                                                                                                                                                                                                         | scaffold_3_mRNA_2745.1                                                 | C_unshiu_01266_mRNA_6.1     | -                               |   |
| GF0021184 | 1                               | 1                        | 0                            | Suppressor of apr1-1, constitutive 1-like protein (1); Disease resistance protein (TIR-NBS-LRR class) (1) | signal transduction [GO:0007165 biological_process] (2); protein binding [GO:0005515 molecular_function] (2); ADP binding [GO:0043531 molecular_function] (1)                                                                                                                                    | Toll interleukin-1 receptor homology (TIR) domain [IPR000157] (2); Leucine-rich repeat domain, L domain-like [IPR032675] (2); Winged helix-turn-helix DNA-binding domain [IPR011991] (1); P-loop containing nucleoside triphosphate hydrolase [IPR027417] (1); NB-ARC [IPR002182] (1)                                                                                                                                                                                     | scaffold_3_mRNA_2740.1                                                 | C_unshiu_02202_mRNA_3.1     | -                               |   |
| GF0021183 | 1                               | 1                        | 0                            | Hypothetical protein (2)                                                                                  | 0                                                                                                                                                                                                                                                                                                | 0                                                                                                                                                                                                                                                                                                                                                                                                                                                                         | scaffold_3_mRNA_2738.1                                                 | C_unshiu_02202_mRNA_2.1     | -                               |   |
| GF0021180 | 1                               | 1                        | 0                            | Protein SUPPRESSOR OF apr1-1, CONSTITUTIVE 1 (2)                                                          | protein binding [GO:0005515 molecular_function] (2); ADP binding [GO:0043531 molecular_function] (1)                                                                                                                                                                                             | Leucine-rich repeat 3 [IPR011713] (2); Leucine-rich repeat, typical subtype [IPR003591] (2); Leucine-rich repeat domain, L domain-like [IPR032675] (2); P-loop containing nucleoside triphosphate hydrolase [IPR027417] (1); NB-ARC [IPR002182] (1)                                                                                                                                                                                                                       | scaffold_3_mRNA_2727.1                                                 | C_unshiu_00991_mRNA_6.1     | -                               |   |
| GF0021179 | 1                               | 1                        | 0                            | Disease resistance protein (TIR-NBS-LRR class) (2)                                                        | signal transduction [GO:0007165 biological_process] (2); ADP binding [GO:0043531 molecular_function] (2); protein binding [GO:0005515 molecular_function] (2)                                                                                                                                    | NB-ARC [IPR002182] (2); P-loop containing nucleoside triphosphate hydrolase [IPR027417] (2); Leucine-rich repeat domain, L domain-like [IPR032675] (2); Toll interleukin-1 receptor homology (TIR) domain [IPR000157] (2); Repeat of unknown function NGLT1 [IPR001641] (3); Leucine-rich repeat [IPR001611] (1); Winged helix-turn-helix DNA-binding domain [IPR011991] (1); Leucine-rich repeat, typical subtype [IPR003591] (1); Leucine-rich repeat 3 [IPR011713] (1) | scaffold_3_mRNA_2723.1                                                 | C_unshiu_02362_mRNA_3.1     | -                               |   |
| GF0021178 | 1                               | 1                        | 0                            | Hypothetical protein (2)                                                                                  | 0                                                                                                                                                                                                                                                                                                | 0                                                                                                                                                                                                                                                                                                                                                                                                                                                                         | scaffold_3_mRNA_2719.1                                                 | C_unshiu_01276_mRNA_2.1     | -                               |   |
| GF0021177 | 1                               | 1                        | 0                            | Hypothetical protein (2)                                                                                  | 0                                                                                                                                                                                                                                                                                                | 0                                                                                                                                                                                                                                                                                                                                                                                                                                                                         | scaffold_3_mRNA_2714.1                                                 | C_unshiu_01276_mRNA_8.1     | -                               |   |
| GF0021176 | 1                               | 1                        | 0                            | Hypothetical protein (2)                                                                                  | 0                                                                                                                                                                                                                                                                                                | 0                                                                                                                                                                                                                                                                                                                                                                                                                                                                         | scaffold_3_mRNA_2703.1                                                 | C_unshiu_01030_mRNA_3.1     | -                               |   |
| GF0021175 | 1                               | 1                        | 0                            | Hypothetical protein (2)                                                                                  | nucleic acid binding [GO:0003676 molecular_function] (1)                                                                                                                                                                                                                                         | Retrotransposon gag domain [IPR005162] (2); Aspartic peptidase domain [IPR01109] (2); Ribonuclease H-like domain [IPR012337] (1)                                                                                                                                                                                                                                                                                                                                          | scaffold_3_mRNA_2702.1                                                 | C_unshiu_01030_mRNA_4.1     | -                               |   |











| ID        | Num. in <i>C. celermarinae</i> | Num. in <i>C. acutis</i> | Num. in <i>P. trifoliata</i> | Note                                                                   | GO                                                                                                                                                                                                                                                                                                                                                                                                                                                                                                                                                                                                                                                                                                                                                                  | InterPro                                                                                                                                                                                                                                                                                                                                                                                                                                                                                                                                             | Members in <i>C. celermarinae</i> | Members in <i>C. acutis</i> | Members in <i>P. trifoliata</i> |
|-----------|--------------------------------|--------------------------|------------------------------|------------------------------------------------------------------------|---------------------------------------------------------------------------------------------------------------------------------------------------------------------------------------------------------------------------------------------------------------------------------------------------------------------------------------------------------------------------------------------------------------------------------------------------------------------------------------------------------------------------------------------------------------------------------------------------------------------------------------------------------------------------------------------------------------------------------------------------------------------|------------------------------------------------------------------------------------------------------------------------------------------------------------------------------------------------------------------------------------------------------------------------------------------------------------------------------------------------------------------------------------------------------------------------------------------------------------------------------------------------------------------------------------------------------|-----------------------------------|-----------------------------|---------------------------------|
| GF0020855 | 1                              | 1                        | 0                            | DUF247 domain protein (1); UFP0481 protein (1)                         |                                                                                                                                                                                                                                                                                                                                                                                                                                                                                                                                                                                                                                                                                                                                                                     | Protein of unknown function DUF247, plant [IPR004158] (2)                                                                                                                                                                                                                                                                                                                                                                                                                                                                                            | scaffold_2_mRNA_801.1             | C_unshiu_00550_mRNA_15.1    | -                               |
| GF0020854 | 1                              | 1                        | 0                            | Hypothetical protein (2)                                               |                                                                                                                                                                                                                                                                                                                                                                                                                                                                                                                                                                                                                                                                                                                                                                     |                                                                                                                                                                                                                                                                                                                                                                                                                                                                                                                                                      | scaffold_2_mRNA_797.1             | C_unshiu_00550_mRNA_11.1    | -                               |
| GF0020853 | 1                              | 1                        | 0                            | DUF594 family protein (2)                                              |                                                                                                                                                                                                                                                                                                                                                                                                                                                                                                                                                                                                                                                                                                                                                                     | Protein of unknown function DUF594 [IPR07658] (2); Domain of unknown function DUF4230 [IPR05315] (2)                                                                                                                                                                                                                                                                                                                                                                                                                                                 | scaffold_2_mRNA_788.1             | C_unshiu_00550_mRNA_1.1     | -                               |
| GF0020852 | 1                              | 1                        | 0                            | Hypothetical protein (2)                                               |                                                                                                                                                                                                                                                                                                                                                                                                                                                                                                                                                                                                                                                                                                                                                                     | Protein of unknown function DUF594 [IPR07658] (2)                                                                                                                                                                                                                                                                                                                                                                                                                                                                                                    | scaffold_2_mRNA_787.1             | C_unshiu_00260_mRNA_39.1    | -                               |
| GF0020851 | 1                              | 1                        | 0                            | Hypothetical protein (2)                                               |                                                                                                                                                                                                                                                                                                                                                                                                                                                                                                                                                                                                                                                                                                                                                                     |                                                                                                                                                                                                                                                                                                                                                                                                                                                                                                                                                      | scaffold_2_mRNA_783.1             | C_unshiu_00260_mRNA_35.1    | -                               |
| GF0020850 | 1                              | 1                        | 0                            | Transcription factor bHLH130 (1); Transcription factor bHLH122 (1)     | protein dimerization activity [GO:0046983 molecular_function] (2); oxidoreductase activity, acting on paired donors, with incorporation or reduction of molecular oxygen [GO:0016705 molecular_function] (2); oxidation-reduction process [GO:0055114 biological_process] (2); heme binding [GO:0020037 molecular_function] (2); iron ion binding [GO:0005506 molecular_function] (2)                                                                                                                                                                                                                                                                                                                                                                               | Myc-type, basic helix-loop-helix (bHLH) domain [IPR011598] (2)                                                                                                                                                                                                                                                                                                                                                                                                                                                                                       | scaffold_2_mRNA_775.1             | C_unshiu_00260_mRNA_28.1    | -                               |
| GF0020849 | 1                              | 1                        | 0                            | Flavonoid 3'-monooxygenase (2)                                         |                                                                                                                                                                                                                                                                                                                                                                                                                                                                                                                                                                                                                                                                                                                                                                     | Cytochrome P450, E-class, group I [IPR020401] (2); Cytochrome P450, conserved site [IPR017972] (2); Cytochrome P450 [IPR001128] (2)                                                                                                                                                                                                                                                                                                                                                                                                                  | scaffold_2_mRNA_772.1             | C_unshiu_00260_mRNA_23.1    | -                               |
| GF0020847 | 1                              | 1                        | 0                            | Hypothetical protein (2)                                               |                                                                                                                                                                                                                                                                                                                                                                                                                                                                                                                                                                                                                                                                                                                                                                     |                                                                                                                                                                                                                                                                                                                                                                                                                                                                                                                                                      | scaffold_2_mRNA_761.1             | C_unshiu_00260_mRNA_15.1    | -                               |
| GF0020846 | 1                              | 1                        | 0                            | Cysteine protease (1); Hypothetical protein (1)                        | biosynthetic process [GO:0009058 biological_process] (2); cysteine-type peptidase activity [GO:0008234 molecular_function] (2); transferase activity [GO:0016740 molecular_function] (2); proteolysis [GO:0006508 biological_process] (2); farnesyl-diphosphate farnesyltransferase activity [GO:0004310 molecular_function] (1); transferase activity, transferring alkyl or aryl (other than methyl) groups [GO:0016765 molecular_function] (1); ergosterol biosynthetic process [GO:0006696 biological_process] (1); squalene synthase activity [GO:00051996 molecular_function] (1)                                                                                                                                                                             | Isoprenoid synthase domain [IPR008949] (2); Cysteine peptidase, histidine active site [IPR025660] (2); Cysteine peptidase, cysteine active site [IPR001691] (2); Squalene/phytoene synthase [IPR002060] (2); Peptidase C1A [IPR013128] (2); Calthosin propeptide inhibitor domain (D9) [IPR01201] (2); Cysteine peptidase, asparagine active site [IPR025661] (2); Peptidase C1A, papain C-terminal [IPR000668] (2); Trans-isoprenyl Diphosphate Synthases, head-to-head [IPR033904] (1); Squalene/phytoene synthase, conserved site [IPR019845] (1) | scaffold_2_mRNA_76.1              | C_unshiu_00213_mRNA_28.1    | -                               |
| GF0020845 | 1                              | 1                        | 0                            | Hypothetical protein (2)                                               |                                                                                                                                                                                                                                                                                                                                                                                                                                                                                                                                                                                                                                                                                                                                                                     |                                                                                                                                                                                                                                                                                                                                                                                                                                                                                                                                                      | scaffold_2_mRNA_759.1             | C_unshiu_00260_mRNA_14.1    | -                               |
| GF0020844 | 1                              | 1                        | 0                            | UDP-glucose flavonoid 3-O-glucosyltransferase 7 (2)                    | metabolic process [GO:0008152 biological_process] (2); transferase activity, transferring hexosyl groups [GO:0016758 molecular_function] (2); transferase activity, transferring alkyl or aryl (other than methyl) groups [GO:0016765 molecular_function] (2); biosynthetic process [GO:0009058 biological_process] (2); transferase activity [GO:0016740 molecular_function] (2); farnesyl-diphosphate farnesyltransferase activity [GO:0004310 molecular_function] (1); squalene synthase activity [GO:00051996 molecular_function] (1); ergosterol biosynthetic process [GO:0006696 biological_process] (1)                                                                                                                                                      | UDP-glucosyltransferase [IPR022131] (2)                                                                                                                                                                                                                                                                                                                                                                                                                                                                                                              | scaffold_2_mRNA_751.1             | C_unshiu_00260_mRNA_6.1     | -                               |
| GF0020843 | 1                              | 1                        | 0                            | Phytoene synthase (2)                                                  | metabolic process [GO:0008152 biological_process] (2); transferase activity, transferring hexosyl groups [GO:0016758 molecular_function] (2); phosphoryl signal transduction system [GO:000160 biological_process] (2); signal transducer activity [GO:0004871 molecular_function] (2)                                                                                                                                                                                                                                                                                                                                                                                                                                                                              | UDP-glucosyltransferase [IPR022131] (2)                                                                                                                                                                                                                                                                                                                                                                                                                                                                                                              | scaffold_2_mRNA_751.1             | C_unshiu_00260_mRNA_5.1     | -                               |
| GF0020842 | 1                              | 1                        | 0                            | UDP-glucose flavonoid 3-O-glucosyltransferase 7 (2)                    | metabolic process [GO:0008152 biological_process] (2); transferase activity, transferring hexosyl groups [GO:0016758 molecular_function] (2); phosphoryl signal transduction system [GO:000160 biological_process] (2); signal transducer activity [GO:0004871 molecular_function] (2)                                                                                                                                                                                                                                                                                                                                                                                                                                                                              | UDP-glucosyltransferase [IPR022131] (2)                                                                                                                                                                                                                                                                                                                                                                                                                                                                                                              | scaffold_2_mRNA_743.1             | C_unshiu_00260_mRNA_5.1     | -                               |
| GF0020841 | 1                              | 1                        | 0                            | Histidine-containing phosphotransfer protein 4 (2)                     | oxidoreductase activity [GO:0016491 molecular_function] (2); oxidation-reduction process [GO:0055114 biological_process] (2); oxidoreductase activity, acting on single donors with incorporation of molecular oxygen, incorporation of two atoms of oxygen [GO:0016702 molecular_function] (2); metal ion binding [GO:0046872 molecular_function] (2); protein binding [GO:0005515 molecular_function] (2); metal ion binding [GO:0046872 molecular_function] (2); oxidoreductase activity, acting on single donors with incorporation of molecular oxygen, incorporation of two atoms of oxygen [GO:0016702 molecular_function] (2); oxidoreductase activity [GO:0016491 molecular_function] (2); oxidation-reduction process [GO:0055114 biological_process] (2) | Signal transduction histidine kinase, phosphotransfer (Hpt) domain [IPR008207] (2)                                                                                                                                                                                                                                                                                                                                                                                                                                                                   | scaffold_2_mRNA_738.1             | C_unshiu_00028_mRNA_25.1    | -                               |
| GF0020837 | 1                              | 1                        | 0                            | Lipoxygenase (2)                                                       | oxidoreductase activity [GO:0016491 molecular_function] (2); oxidation-reduction process [GO:0055114 biological_process] (2); oxidoreductase activity, acting on single donors with incorporation of molecular oxygen, incorporation of two atoms of oxygen [GO:0016702 molecular_function] (2); metal ion binding [GO:0046872 molecular_function] (2); protein binding [GO:0005515 molecular_function] (2)                                                                                                                                                                                                                                                                                                                                                         | Lipoxygenase, plant [IPR001246] (2); Lipoxygenase, domain 3 [IPR027433] (2); PLAT/LH2 domain [IPR001024] (2); Lipoxygenase, conserved site [IPR020834] (2); Lipoxygenase, iron binding site [IPR020833] (2); Lipoxygenase, C-terminal [IPR013819] (2)                                                                                                                                                                                                                                                                                                | scaffold_2_mRNA_708.1             | C_unshiu_00076_mRNA_52.1    | -                               |
| GF0020836 | 1                              | 1                        | 0                            | Hypothetical protein (2)                                               | protein binding [GO:0005515 molecular_function] (2); metal ion binding [GO:0046872 molecular_function] (2); oxidoreductase activity, acting on single donors with incorporation of molecular oxygen, incorporation of two atoms of oxygen [GO:0016702 molecular_function] (2); oxidoreductase activity [GO:0016491 molecular_function] (2); oxidation-reduction process [GO:0055114 biological_process] (2)                                                                                                                                                                                                                                                                                                                                                         | Lipoxygenase, C-terminal [IPR013819] (2); Lipoxygenase, conserved site [IPR020834] (2); Lipoxygenase, C-terminal [IPR001024] (2); Lipoxygenase, plant [IPR001246] (2)                                                                                                                                                                                                                                                                                                                                                                                | scaffold_2_mRNA_705.1             | C_unshiu_00871_mRNA_11.1    | -                               |
| GF0020834 | 1                              | 1                        | 0                            | Putative lipoxygenase 5 (2)                                            | oxidoreductase activity [GO:0016491 molecular_function] (2); oxidation-reduction process [GO:0055114 biological_process] (2); oxidoreductase activity, acting on single donors with incorporation of molecular oxygen, incorporation of two atoms of oxygen [GO:0016702 molecular_function] (2); zinc ion binding [GO:0008270 molecular_function] (2); nucleic acid binding [GO:0003676 molecular_function] (2)                                                                                                                                                                                                                                                                                                                                                     | Lipoxygenase, C-terminal [IPR013819] (2); Lipoxygenase, conserved site [IPR020834] (2); Lipoxygenase, C-terminal [IPR001024] (2); Lipoxygenase, plant [IPR001246] (2)                                                                                                                                                                                                                                                                                                                                                                                | scaffold_2_mRNA_701.1             | C_unshiu_00076_mRNA_47.1    | -                               |
| GF0020833 | 1                              | 1                        | 0                            | Hypothetical protein (2)                                               | metal ion binding [GO:0046872 molecular_function] (2); protein binding [GO:0005515 molecular_function] (2); oxidation-reduction process [GO:0055114 biological_process] (2); oxidoreductase activity [GO:0016491 molecular_function] (2); oxidation-reduction process [GO:0055114 biological_process] (2)                                                                                                                                                                                                                                                                                                                                                                                                                                                           | Lipoxygenase, conserved site [IPR020834] (2); Lipoxygenase, C-terminal [IPR001024] (2); Lipoxygenase, plant [IPR001246] (2)                                                                                                                                                                                                                                                                                                                                                                                                                          | scaffold_2_mRNA_697.1             | C_unshiu_00076_mRNA_44.1    | -                               |
| GF0020832 | 1                              | 1                        | 0                            | Lipoxygenase (2)                                                       | metal ion binding [GO:0046872 molecular_function] (2); protein binding [GO:0005515 molecular_function] (2); oxidation-reduction process [GO:0055114 biological_process] (2); oxidoreductase activity [GO:0016491 molecular_function] (2); oxidation-reduction process [GO:0055114 biological_process] (2)                                                                                                                                                                                                                                                                                                                                                                                                                                                           | Lipoxygenase, conserved site [IPR020834] (2); Lipoxygenase, C-terminal [IPR001024] (2); Lipoxygenase, plant [IPR001246] (2)                                                                                                                                                                                                                                                                                                                                                                                                                          | scaffold_2_mRNA_695.1             | C_unshiu_00076_mRNA_42.1    | -                               |
| GF0020831 | 1                              | 1                        | 0                            | Retransposon protein, putative, Ty1-opsis subclass (2)                 | zinc ion binding [GO:0008270 molecular_function] (2); nucleic acid binding [GO:0003676 molecular_function] (2)                                                                                                                                                                                                                                                                                                                                                                                                                                                                                                                                                                                                                                                      | Lipoxygenase, conserved site [IPR020834] (2); Lipoxygenase, C-terminal [IPR001024] (2); Lipoxygenase, plant [IPR001246] (2)                                                                                                                                                                                                                                                                                                                                                                                                                          | scaffold_2_mRNA_692.1             | C_unshiu_00076_mRNA_10.1    | -                               |
| GF0020829 | 1                              | 1                        | 0                            | Hypothetical protein (2)                                               |                                                                                                                                                                                                                                                                                                                                                                                                                                                                                                                                                                                                                                                                                                                                                                     |                                                                                                                                                                                                                                                                                                                                                                                                                                                                                                                                                      | scaffold_2_mRNA_684.1             | C_unshiu_00076_mRNA_37.1    | -                               |
| GF0020828 | 1                              | 1                        | 0                            | Acetyl-coenzyme A synthetase (2)                                       | metabolic process [GO:0008152 biological_process] (2); catalytic activity [GO:0003824 molecular_function] (2)                                                                                                                                                                                                                                                                                                                                                                                                                                                                                                                                                                                                                                                       | AMP binding, conserved site [IPR020845] (2); AMP-dependent synthetase/ligase [IPR000873] (2)                                                                                                                                                                                                                                                                                                                                                                                                                                                         | scaffold_2_mRNA_682.1             | C_unshiu_00213_mRNA_38.1    | -                               |
| GF0020827 | 1                              | 1                        | 0                            | G-type lectin S-receptor-like serine/threonine-protein kinase RLK1 (2) | protein phosphorylation [GO:0006468 biological_process] (2); protein serine/threonine kinase activity [GO:0004674 molecular_function] (2); protein kinase activity [GO:0004672 molecular_function] (2); ATP binding [GO:0005524 molecular_function] (2); recognition of pollen [GO:0048544 biological_process] (1)                                                                                                                                                                                                                                                                                                                                                                                                                                                  | Bull-type lectin domain [IPR001480] (2); Protein kinase, ATP binding site [IPR017441] (2); Serine/threonine-protein kinase, active site [IPR008271] (2); Protein kinase-like domain [IPR011099] (2); S-receptor-like serine/threonine-protein kinase [IPR024171] (2); Protein kinase domain [IPR007119] (2); S-leucos glycoprotein domain [IPR008558] (1); Serine/threonine/dual specificity protein kinase, catalytic domain [IPR002290] (1); Concavalin A-like lectin/glucanase domain [IPR013320] (1)                                             | scaffold_2_mRNA_678.1             | C_unshiu_00076_mRNA_31.1    | -                               |
| GF0020826 | 1                              | 1                        | 0                            | Hypothetical protein (2)                                               |                                                                                                                                                                                                                                                                                                                                                                                                                                                                                                                                                                                                                                                                                                                                                                     |                                                                                                                                                                                                                                                                                                                                                                                                                                                                                                                                                      | scaffold_2_mRNA_667.1             | C_unshiu_00076_mRNA_20.1    | -                               |
| GF0020824 | 1                              | 1                        | 0                            | Hypothetical protein (2)                                               | magnesium ion binding [GO:0000287 molecular_function] (2); lyase activity [GO:0016529 molecular_function] (2); terpene synthase activity [GO:0010333 molecular_function] (2); metabolic process [GO:0008152 biological_process] (1)                                                                                                                                                                                                                                                                                                                                                                                                                                                                                                                                 | Isoprenoid synthase domain [IPR008949] (2); Terpene synthase, metal-binding domain [IPR005630] (2); Terpene cyclase/protein prenyltransferase alpha-toroid [IPR008930] (2); Terpene synthase, N-terminal domain [IPR01906] (1)                                                                                                                                                                                                                                                                                                                       | scaffold_2_mRNA_650.1             | C_unshiu_00076_mRNA_11.1    | -                               |
| GF0020823 | 1                              | 1                        | 0                            | Hypothetical protein (2)                                               |                                                                                                                                                                                                                                                                                                                                                                                                                                                                                                                                                                                                                                                                                                                                                                     |                                                                                                                                                                                                                                                                                                                                                                                                                                                                                                                                                      | scaffold_2_mRNA_612.1             | C_unshiu_00029_mRNA_29.1    | -                               |
| GF0020822 | 1                              | 1                        | 0                            | Hypothetical protein (2)                                               |                                                                                                                                                                                                                                                                                                                                                                                                                                                                                                                                                                                                                                                                                                                                                                     |                                                                                                                                                                                                                                                                                                                                                                                                                                                                                                                                                      | scaffold_2_mRNA_611.1             | C_unshiu_00029_mRNA_30.1    | -                               |
| GF0020820 | 1                              | 1                        | 0                            | Hypothetical protein (2)                                               |                                                                                                                                                                                                                                                                                                                                                                                                                                                                                                                                                                                                                                                                                                                                                                     |                                                                                                                                                                                                                                                                                                                                                                                                                                                                                                                                                      | scaffold_2_mRNA_61.1              | C_unshiu_00109_mRNA_60.1    | -                               |
| GF0020819 | 1                              | 1                        | 0                            | Hypothetical protein (2)                                               | ATP binding [GO:0005524 molecular_function] (2); formate-tetrahydrofolate ligase activity [GO:0004329 molecular_function] (2); folic acid-containing compound biosynthetic process [GO:0009396 biological_process] (2)                                                                                                                                                                                                                                                                                                                                                                                                                                                                                                                                              | P-loop containing nucleoside triphosphate hydrolase [IPR027417] (2); Formate-tetrahydrofolate ligase, FTfHS [IPR000559] (2)                                                                                                                                                                                                                                                                                                                                                                                                                          | scaffold_2_mRNA_607.1             | C_unshiu_00029_mRNA_36.1    | -                               |
| GF0020818 | 1                              | 1                        | 0                            | 10-formyltetrahydrofolate synthetase family protein (2)                | ATP binding [GO:0005524 molecular_function] (2); formate-tetrahydrofolate ligase activity [GO:0004329 molecular_function] (2); folic acid-containing compound biosynthetic process [GO:0009396 biological_process] (2)                                                                                                                                                                                                                                                                                                                                                                                                                                                                                                                                              | P-loop containing nucleoside triphosphate hydrolase [IPR027417] (2); Formate-tetrahydrofolate ligase, FTfHS [IPR000559] (2)                                                                                                                                                                                                                                                                                                                                                                                                                          | scaffold_2_mRNA_606.1             | C_unshiu_00029_mRNA_37.1    | -                               |

| ID        | Num. in <i>C. clementinae</i> | Num. in <i>C. acutis</i> | Num. in <i>P. trifoliata</i> | Note                                                                                                                              | GO                                                                                                                                                                                                                                                                                                                                                                              | InterPro                                                                                                                                                                                                                                                                                                                                                                                                                                                                                                                                                                        | Members in <i>C. clementinae</i> | Members in <i>C. acutis</i> | Members in <i>P. trifoliata</i> |
|-----------|-------------------------------|--------------------------|------------------------------|-----------------------------------------------------------------------------------------------------------------------------------|---------------------------------------------------------------------------------------------------------------------------------------------------------------------------------------------------------------------------------------------------------------------------------------------------------------------------------------------------------------------------------|---------------------------------------------------------------------------------------------------------------------------------------------------------------------------------------------------------------------------------------------------------------------------------------------------------------------------------------------------------------------------------------------------------------------------------------------------------------------------------------------------------------------------------------------------------------------------------|----------------------------------|-----------------------------|---------------------------------|
| GF0020816 | 1                             | 1                        | 0                            | Cyclin dependent protein kinase homolog (1); Hypothetical protein (1)                                                             | ATP binding [GO:0005524 molecular_function] (2); protein phosphorylation [GO:0006468 biological_process] (2); protein kinase activity [GO:0004672 molecular_function] (2)                                                                                                                                                                                                       | Protein kinase-like domain [IPRO011009] (2); Protein kinase domain [IPRO00719] (2); Pentatricopeptide repeat [IPRO2885] (2); Serine/threonine-protein kinase, active site [IPRO08271] (2); Serine/threonine/tyrosine-specific protein kinase, catalytic domain [IPRO02290] (1)                                                                                                                                                                                                                                                                                                  | scaffold_2_mRNA_576.1            | C_unshiu_00029_mRNA_59.1    | -                               |
| GF0020815 | 1                             | 1                        | 0                            | Disease resistance response protein 206 (2)                                                                                       | heme binding [GO:0020037 molecular_function] (2); iron ion binding [GO:0005506 molecular_function] (2); oxidoreductase activity, acting on paired donors, with incorporation or reduction of molecular oxygen [GO:0016705 molecular_function] (2); oxidation-reduction process [GO:0055114 biological_process] (2)                                                              | Cytochrome P450 [IPRO01128] (2); Cytochrome P450, E-class, group I [IPRO02401] (2)                                                                                                                                                                                                                                                                                                                                                                                                                                                                                              | scaffold_2_mRNA_545.1            | C_unshiu_00023_mRNA_7.1     | -                               |
| GF0020813 | 1                             | 1                        | 0                            | Hypothetical protein (2)                                                                                                          |                                                                                                                                                                                                                                                                                                                                                                                 |                                                                                                                                                                                                                                                                                                                                                                                                                                                                                                                                                                                 | scaffold_2_mRNA_544.1            | C_unshiu_00023_mRNA_8.1     | -                               |
| GF0020812 | 1                             | 1                        | 0                            | Serine/threonine-protein phosphatase PPA-1 catalytic subunit (1); Serine/threonine-protein phosphatase PPA2 catalytic subunit (1) | hydrolase activity [GO:0016787 molecular_function] (2)                                                                                                                                                                                                                                                                                                                          | Serine/threonine-specific protein phosphatase/bisphospho(serine/threonine) tetraphosphatase [IPRO06186] (2); Metallo-dependent phosphatase-like [IPRO29052] (2); Calcineurin-like phosphoesterase domain, apaf1 type [IPRO04843] (1); Calcineurin-like phosphoesterase domain, apaf1 type [IPRO04843] (1); Calcineurin-propeptide inhibitor domain (29) [IPRO13201] (2); Peptidase C1A, papain C-terminal [IPRO00668] (2); Cysteine peptidase, asparagine active site [IPRO25661] (2); Cysteine peptidase, histidine active site [IPRO25660] (2); Peptidase C1A [IPRO13128] (2) | scaffold_2_mRNA_531.1            | C_unshiu_00023_mRNA_22.2    | -                               |
| GF0020811 | 1                             | 1                        | 0                            | Vignin (2)                                                                                                                        | cysteine-type peptidase activity [GO:0005234 molecular_function] (2); proteolysis [GO:0006508 biological_process] (2)                                                                                                                                                                                                                                                           | Ulp1 protease family, C-terminal catalytic domain [IPRO03653] (2); Carbohydrate/puine kinase, PkKB, conserved site [IPRO02175] (2); Carbohydrate kinase PkAB [IPRO011611] (2); Ribokinase-like [IPRO29056] (2)                                                                                                                                                                                                                                                                                                                                                                  | scaffold_2_mRNA_529.1            | C_unshiu_00023_mRNA_24.1    | -                               |
| GF0020810 | 1                             | 1                        | 0                            | Hypothetical protein (2)                                                                                                          |                                                                                                                                                                                                                                                                                                                                                                                 |                                                                                                                                                                                                                                                                                                                                                                                                                                                                                                                                                                                 | scaffold_2_mRNA_525.1            | C_unshiu_00062_mRNA_41.1    | -                               |
| GF0020809 | 1                             | 1                        | 0                            | Hypothetical protein (2)                                                                                                          | cysteine-type peptidase activity [GO:0005234 molecular_function] (2); phosphotransferase activity, alcohol group as acceptor [GO:0016773 molecular_function] (2); proteolysis [GO:0006508 biological_process] (2)                                                                                                                                                               | Ulp1 protease family, C-terminal catalytic domain [IPRO03653] (2); Carbohydrate/puine kinase, PkKB, conserved site [IPRO02175] (2); Carbohydrate kinase PkAB [IPRO011611] (2); Ribokinase-like [IPRO29056] (2)                                                                                                                                                                                                                                                                                                                                                                  | scaffold_2_mRNA_520.1            | C_unshiu_00062_mRNA_35.1    | -                               |
| GF0020808 | 1                             | 1                        | 0                            | Hypothetical protein (2)                                                                                                          |                                                                                                                                                                                                                                                                                                                                                                                 | Leucine-rich repeat domain, L domain-like [IPRO32675] (2)                                                                                                                                                                                                                                                                                                                                                                                                                                                                                                                       | scaffold_2_mRNA_519.1            | C_unshiu_00062_mRNA_33.1    | -                               |
| GF0020807 | 1                             | 1                        | 0                            | Hypothetical protein (2)                                                                                                          |                                                                                                                                                                                                                                                                                                                                                                                 |                                                                                                                                                                                                                                                                                                                                                                                                                                                                                                                                                                                 | scaffold_2_mRNA_518.1            | C_unshiu_00062_mRNA_32.1    | -                               |
| GF0020806 | 1                             | 1                        | 0                            | Hypothetical protein (2)                                                                                                          |                                                                                                                                                                                                                                                                                                                                                                                 |                                                                                                                                                                                                                                                                                                                                                                                                                                                                                                                                                                                 | scaffold_2_mRNA_516.1            | C_unshiu_00062_mRNA_30.1    | -                               |
| GF0020805 | 1                             | 1                        | 0                            | Hypothetical protein (2)                                                                                                          |                                                                                                                                                                                                                                                                                                                                                                                 |                                                                                                                                                                                                                                                                                                                                                                                                                                                                                                                                                                                 | scaffold_2_mRNA_515.1            | C_unshiu_00062_mRNA_29.1    | -                               |
| GF0020804 | 1                             | 1                        | 0                            | Hypothetical protein (2)                                                                                                          |                                                                                                                                                                                                                                                                                                                                                                                 |                                                                                                                                                                                                                                                                                                                                                                                                                                                                                                                                                                                 | scaffold_2_mRNA_513.1            | C_unshiu_00062_mRNA_27.1    | -                               |
| GF0020803 | 1                             | 1                        | 0                            | Cytokinin riboside 5'-monophosphate phosphoribohydrolase (2)                                                                      |                                                                                                                                                                                                                                                                                                                                                                                 | LOG family [IPRO31100] (2); Cytokinin riboside 5'-monophosphate phosphoribohydrolase LOG [IPRO05269] (2)                                                                                                                                                                                                                                                                                                                                                                                                                                                                        | scaffold_2_mRNA_511.1            | C_unshiu_00109_mRNA_49.1    | -                               |
| GF0020802 | 1                             | 1                        | 0                            | Hypothetical protein (2)                                                                                                          |                                                                                                                                                                                                                                                                                                                                                                                 |                                                                                                                                                                                                                                                                                                                                                                                                                                                                                                                                                                                 | scaffold_2_mRNA_508.1            | C_unshiu_00062_mRNA_22.1    | -                               |
| GF0020801 | 1                             | 1                        | 0                            | Hypothetical protein (2)                                                                                                          |                                                                                                                                                                                                                                                                                                                                                                                 |                                                                                                                                                                                                                                                                                                                                                                                                                                                                                                                                                                                 | scaffold_2_mRNA_507.1            | C_unshiu_00062_mRNA_21.1    | -                               |
| GF0020800 | 1                             | 1                        | 0                            | Hypothetical protein (2)                                                                                                          |                                                                                                                                                                                                                                                                                                                                                                                 |                                                                                                                                                                                                                                                                                                                                                                                                                                                                                                                                                                                 | scaffold_2_mRNA_505.1            | C_unshiu_00062_mRNA_19.1    | -                               |
| GF0020799 | 1                             | 1                        | 0                            | Hypothetical protein (2)                                                                                                          |                                                                                                                                                                                                                                                                                                                                                                                 |                                                                                                                                                                                                                                                                                                                                                                                                                                                                                                                                                                                 | scaffold_2_mRNA_498.1            | C_unshiu_02524_mRNA_1.1     | -                               |
| GF0020798 | 1                             | 1                        | 0                            | Hypothetical protein (2)                                                                                                          | DNA binding [GO:0003677 molecular_function] (2); regulation of transcription, DNA-templated [GO:0006355 biological_process] (2)                                                                                                                                                                                                                                                 | NAC domain [IPRO03441] (2)                                                                                                                                                                                                                                                                                                                                                                                                                                                                                                                                                      | scaffold_2_mRNA_493.1            | C_unshiu_00992_mRNA_3.1     | -                               |
| GF0020797 | 1                             | 1                        | 0                            | Hypothetical protein (2)                                                                                                          |                                                                                                                                                                                                                                                                                                                                                                                 |                                                                                                                                                                                                                                                                                                                                                                                                                                                                                                                                                                                 | scaffold_2_mRNA_489.1            | C_unshiu_00992_mRNA_7.1     | -                               |
| GF0020795 | 1                             | 1                        | 0                            | DUF2431 domain protein (2)                                                                                                        |                                                                                                                                                                                                                                                                                                                                                                                 | Domain of unknown function DUF2431 [IPRO19446] (2)                                                                                                                                                                                                                                                                                                                                                                                                                                                                                                                              | scaffold_2_mRNA_471.1            | C_unshiu_00077_mRNA_73.1    | -                               |
| GF0020794 | 1                             | 1                        | 0                            | Hypothetical protein (2)                                                                                                          | sulfotransferase activity [GO:0008146 molecular_function] (2)                                                                                                                                                                                                                                                                                                                   | P-loop containing nucleoside triphosphate hydrolase [IPRO02147] (2); Sulfotransferase domain [IPRO00863] (2)                                                                                                                                                                                                                                                                                                                                                                                                                                                                    | scaffold_2_mRNA_471.1            | C_unshiu_00061_mRNA_15.1    | -                               |
| GF0020793 | 1                             | 1                        | 0                            | Pentatricopeptide (1); Hypothetical protein (1)                                                                                   | protein binding [GO:0005515 molecular_function] (2); zinc ion binding [GO:0008270 molecular_function] (1)                                                                                                                                                                                                                                                                       | (2); Tetra- and pentatricopeptide-like helical domain [IPRO11900] (2); DWV domain [IPRO32867] (1)                                                                                                                                                                                                                                                                                                                                                                                                                                                                               | scaffold_2_mRNA_470.1            | C_unshiu_00077_mRNA_65.1    | -                               |
| GF0020792 | 1                             | 1                        | 0                            | Pectinesterase inhibitor (2)                                                                                                      | enzyme inhibitor activity [GO:0004857 molecular_function] (2)                                                                                                                                                                                                                                                                                                                   | Pectinesterase inhibitor domain [IPRO06951] (2)                                                                                                                                                                                                                                                                                                                                                                                                                                                                                                                                 | scaffold_2_mRNA_470.1            | C_unshiu_00077_mRNA_63.1    | -                               |
| GF0020791 | 1                             | 1                        | 0                            | 5sRfNA-activating protein complex subunit 3 isoform 3 (2)                                                                         |                                                                                                                                                                                                                                                                                                                                                                                 | sRNA-activating protein complex, subunit 3 [IPRO22042] (2)                                                                                                                                                                                                                                                                                                                                                                                                                                                                                                                      | scaffold_2_mRNA_470.1            | C_unshiu_00077_mRNA_59.1    | -                               |
| GF0020790 | 1                             | 1                        | 0                            | Metal ion binding protein (2)                                                                                                     | metal ion transport [GO:0030001 biological_process] (2); metal ion binding [GO:0046872 molecular_function] (2)                                                                                                                                                                                                                                                                  | Heavy metal-associated domain, HMA [IPRO06121] (2)                                                                                                                                                                                                                                                                                                                                                                                                                                                                                                                              | scaffold_2_mRNA_467.1            | C_unshiu_00077_mRNA_34.1    | -                               |
| GF0020789 | 1                             | 1                        | 0                            | Hypothetical protein (2)                                                                                                          |                                                                                                                                                                                                                                                                                                                                                                                 |                                                                                                                                                                                                                                                                                                                                                                                                                                                                                                                                                                                 | scaffold_2_mRNA_467.1            | C_unshiu_00077_mRNA_31.1    | -                               |
| GF0020788 | 1                             | 1                        | 0                            | Hypothetical protein (2)                                                                                                          |                                                                                                                                                                                                                                                                                                                                                                                 |                                                                                                                                                                                                                                                                                                                                                                                                                                                                                                                                                                                 | scaffold_2_mRNA_467.1            | C_unshiu_00062_mRNA_11.1    | -                               |
| GF0020786 | 1                             | 1                        | 0                            | CASP-like protein 2B1 (2)                                                                                                         |                                                                                                                                                                                                                                                                                                                                                                                 | Domain of unknown function DUF588 [IPRO06702] (2); Caspases strip membrane protein [IPRO06459] (2)                                                                                                                                                                                                                                                                                                                                                                                                                                                                              | scaffold_2_mRNA_465.1            | C_unshiu_00077_mRNA_18.1    | -                               |
| GF0020785 | 1                             | 1                        | 0                            | Hypothetical protein (2)                                                                                                          |                                                                                                                                                                                                                                                                                                                                                                                 |                                                                                                                                                                                                                                                                                                                                                                                                                                                                                                                                                                                 | scaffold_2_mRNA_465.1            | C_unshiu_00061_mRNA_9.1     | -                               |
| GF0020784 | 1                             | 1                        | 0                            | Inositol monophosphatase (2)                                                                                                      | phosphatidylinositol phosphorylation [GO:0046854 biological_process] (2); inositol phosphate dephosphorylation [GO:0046855 biological_process] (1); inositol monophosphate 1-phosphatase activity [GO:0008034 molecular_function] (1)                                                                                                                                           | Inositol monophosphatase, metal-binding site [IPRO20553] (2); Inositol monophosphatase, conserved site [IPRO20550] (2); Inositol monophosphatase, Lithium-sensitive [IPRO20552] (1); Inositol monophosphatase-like [IPRO00760] (1); Inositol monophosphatase [IPRO033942] (1); Inositol monophosphatase [IPRO00760] (1)                                                                                                                                                                                                                                                         | scaffold_2_mRNA_464.1            | C_unshiu_00077_mRNA_6.2     | -                               |
| GF0020783 | 1                             | 1                        | 0                            | Hypothetical protein (2)                                                                                                          |                                                                                                                                                                                                                                                                                                                                                                                 |                                                                                                                                                                                                                                                                                                                                                                                                                                                                                                                                                                                 | scaffold_2_mRNA_463.1            | C_unshiu_00337_mRNA_45.1    | -                               |
| GF0020782 | 1                             | 1                        | 0                            | Hypothetical protein (2)                                                                                                          |                                                                                                                                                                                                                                                                                                                                                                                 |                                                                                                                                                                                                                                                                                                                                                                                                                                                                                                                                                                                 | scaffold_2_mRNA_463.1            | C_unshiu_00337_mRNA_40.1    | -                               |
| GF0020781 | 1                             | 1                        | 0                            | Hypothetical protein (2)                                                                                                          | protein binding [GO:0005515 molecular_function] (2)                                                                                                                                                                                                                                                                                                                             | F-box domain [IPRO01810] (2)                                                                                                                                                                                                                                                                                                                                                                                                                                                                                                                                                    | scaffold_2_mRNA_463.1            | C_unshiu_00061_mRNA_7.1     | -                               |
| GF0020780 | 1                             | 1                        | 0                            | Serine/threonine-protein kinase HT1 (2)                                                                                           | ATP binding [GO:0005524 molecular_function] (2); protein phosphorylation [GO:0006468 biological_process] (2); protein kinase activity [GO:0004672 molecular_function] (2); protein serine/threonine kinase activity [GO:0004674 molecular_function] (1)                                                                                                                         | Protein kinase domain [IPRO00719] (2); Protein kinase-like domain [IPRO011009] (2); Serine/threonine-protein kinase, active site [IPRO08271] (2); Serine/threonine/tyrosine-protein kinase, catalytic domain [IPRO01245] (1); Serine/threonine/tyrosine-specific protein kinase catalytic domain [IPRO01245] (1); Serine/threonine-protein kinase HT1, plant [IPRO15783] (1)                                                                                                                                                                                                    | scaffold_2_mRNA_461.1            | C_unshiu_00337_mRNA_26.1    | -                               |
| GF0020778 | 1                             | 1                        | 0                            | BAH and coiled-coil domain-containing (2)                                                                                         | chromatin binding [GO:0003682 molecular_function] (2); protein binding [GO:0005515 molecular_function] (2); zinc ion binding [GO:0008270 molecular_function] (2)                                                                                                                                                                                                                | Bromo adjacent homology (BAH) domain [IPRO01025] (2); Zinc finger, FYVE/PHD-type [IPRO11011] (2); Zinc finger, RING1/YVY/PHD-type [IPRO13083] (2); Zinc finger, PHD-type conserved site [IPRO19786] (2); Zinc finger, PHD-type [IPRO19651] (2); Zinc finger, PHD-finger [IPRO19787] (2)                                                                                                                                                                                                                                                                                         | scaffold_2_mRNA_459.1            | C_unshiu_00337_mRNA_3.1     | -                               |
| GF0020775 | 1                             | 1                        | 0                            | Hypothetical protein (2)                                                                                                          |                                                                                                                                                                                                                                                                                                                                                                                 |                                                                                                                                                                                                                                                                                                                                                                                                                                                                                                                                                                                 | scaffold_2_mRNA_459.1            | C_unshiu_00061_mRNA_3.1     | -                               |
| GF0020773 | 1                             | 1                        | 0                            | Hypothetical protein (2)                                                                                                          |                                                                                                                                                                                                                                                                                                                                                                                 |                                                                                                                                                                                                                                                                                                                                                                                                                                                                                                                                                                                 | scaffold_2_mRNA_459.1            | C_unshiu_00048_mRNA_1.1     | -                               |
| GF0020772 | 1                             | 1                        | 0                            | Pectate lyase (2)                                                                                                                 |                                                                                                                                                                                                                                                                                                                                                                                 | Pectin lyase fold/virulence factor [IPRO11050] (2); Pectate lyase fold [IPRO12334] (2); Pectate lyase/Amb allergen [IPRO02022] (2); Amb-Allergen [IPRO18052] (2)                                                                                                                                                                                                                                                                                                                                                                                                                | scaffold_2_mRNA_457.1            | C_unshiu_00048_mRNA_2.1     | -                               |
| GF0020771 | 1                             | 1                        | 0                            | Peroxisomal membrane protein PMP22 (2)                                                                                            | integral component of membrane [GO:0016021 cellular_component] (2)                                                                                                                                                                                                                                                                                                              | Mpv17/PMP22 [IPRO07248] (2)                                                                                                                                                                                                                                                                                                                                                                                                                                                                                                                                                     | scaffold_2_mRNA_457.1            | C_unshiu_00048_mRNA_10.1    | -                               |
| GF0020770 | 1                             | 1                        | 0                            | Hypothetical protein (2)                                                                                                          |                                                                                                                                                                                                                                                                                                                                                                                 |                                                                                                                                                                                                                                                                                                                                                                                                                                                                                                                                                                                 | scaffold_2_mRNA_456.1            | C_unshiu_00048_mRNA_14.1    | -                               |
| GF0020769 | 1                             | 1                        | 0                            | Autophagy-related protein 8C (2)                                                                                                  |                                                                                                                                                                                                                                                                                                                                                                                 | Ubiquitin-related domain [IPRO29071] (2); Autophagy protein Atg8 ubiquitin-like [IPRO04241] (2)                                                                                                                                                                                                                                                                                                                                                                                                                                                                                 | scaffold_2_mRNA_455.2            | C_unshiu_00048_mRNA_29.2    | -                               |
| GF0020768 | 1                             | 1                        | 0                            | Senescence regulator (2)                                                                                                          |                                                                                                                                                                                                                                                                                                                                                                                 | Senescence regulator S40 [IPRO07608] (2)                                                                                                                                                                                                                                                                                                                                                                                                                                                                                                                                        | scaffold_2_mRNA_455.1            | C_unshiu_00048_mRNA_31.1    | -                               |
| GF0020767 | 1                             | 1                        | 0                            | ATP synthase F1, gamma subunit (2)                                                                                                | ATP synthesis coupled proton transport [GO:0015986 biological_process] (2); proton-transporting ATP synthase activity, rotational mechanism [GO:0046933 molecular_function] (2); proton-transporting ATP synthase complex, catalytic core F1 [GO:0045261 cellular_component] (2); proton-transporting ATPase activity, rotational mechanism [GO:0046961 molecular_function] (1) | ATP synthase, F1 complex, gamma subunit conserved site [IPRO23632] (1); ATPase, F1 complex, gamma subunit domain [IPRO23633] (1); ATPase, F1 complex, gamma subunit conserved site [IPRO23632] (1); ATP synthase, F1 complex, gamma subunit [IPRO00131] (1); ATPase, F1 complex, gamma subunit [IPRO00131] (1)                                                                                                                                                                                                                                                                  | scaffold_2_mRNA_454.1            | C_unshiu_00048_mRNA_33.1    | -                               |

| ID        | Num. in <i>C. clementinae</i> | Num. in <i>C. anthoni</i> | Num. in <i>P. trifoliate</i> | Note                                                                                 | GO                                                                                                                                                                                                                                                                                                                                                                                                                                                                                                                                                       | InterPro                                                                                                                                                                                                                                                                                                                                                                                                                                                                                                  | Members in <i>C. clementinae</i> | Members in <i>C. anthoni</i> | Members in <i>P. trifoliate</i> |
|-----------|-------------------------------|---------------------------|------------------------------|--------------------------------------------------------------------------------------|----------------------------------------------------------------------------------------------------------------------------------------------------------------------------------------------------------------------------------------------------------------------------------------------------------------------------------------------------------------------------------------------------------------------------------------------------------------------------------------------------------------------------------------------------------|-----------------------------------------------------------------------------------------------------------------------------------------------------------------------------------------------------------------------------------------------------------------------------------------------------------------------------------------------------------------------------------------------------------------------------------------------------------------------------------------------------------|----------------------------------|------------------------------|---------------------------------|
| GF0020765 | 1                             | 1                         | 0                            | Protein DETOXIFICATION 36 (1); Protein TRANSPARENT TESTA 12 (1)                      | transmembrane transport [GO:0055085 biological_process] (2); drug transmembrane transporter activity [GO:0015238 molecular_function] (2); antiporter activity [GO:0015297 molecular_function] (2); membrane [GO:0016020 cellular_component] (2); drug transmembrane transport [GO:0006855 biological_process] (2); oxidoreductase activity [GO:0016491 molecular_function] (1); oxidation-reduction process [GO:0055114 biological_process] (1); FMN binding [GO:0010181 molecular_function] (1); catalytic activity [GO:0003824 molecular_function] (1) | Multi antimicrobial extrusion protein [IPRO02538] (2); Alpha-hydroxy acid dehydrogenase, FMN-dependent [IPRO12133] (1); FMN-dependent alpha-hydroxy acid dehydrogenase, active site [IPRO0829] (1); Adenosine-type TIM barrel [IPRO13785] (1); FMN-dependent dehydrogenase [IPRO00262] (1)                                                                                                                                                                                                                | scaffold_2_mRNA_4538.1           | C_unshiu_00048_mRNA_42.1     | -                               |
| GF0020764 | 1                             | 1                         | 0                            | Hypothetical protein (2)                                                             | nucleic acid binding [GO:0003676 molecular_function] (2); metal ion binding [GO:0046872 molecular_function] (1)                                                                                                                                                                                                                                                                                                                                                                                                                                          | Zinc finger, double-stranded RNA binding [IPRO22755] (2); Zinc finger C2H2-type/integrase DNA-binding domain [IPRO13087] (1); Zinc finger, C2H2-like [IPRO15880] (1); Zinc finger, C2H2 [IPRO010971] (1); Zinc finger C2H2-type [IPRO13087] (1)                                                                                                                                                                                                                                                           | scaffold_2_mRNA_4533.1           | C_unshiu_00048_mRNA_49.1     | -                               |
| GF0020761 | 1                             | 1                         | 0                            | Hypothetical protein (2)                                                             | nucleic acid binding [GO:0003676 molecular_function] (2)                                                                                                                                                                                                                                                                                                                                                                                                                                                                                                 | Ribonuclease H-like domain [IPRO12357] (2)                                                                                                                                                                                                                                                                                                                                                                                                                                                                | scaffold_2_mRNA_452.1            | C_unshiu_01757_mRNA_6.1      | -                               |
| GF0020760 | 1                             | 1                         | 0                            | Hypothetical protein (2)                                                             | nucleic acid binding [GO:0003676 molecular_function] (2)                                                                                                                                                                                                                                                                                                                                                                                                                                                                                                 | Ribonuclease H-like domain [IPRO12357] (2)                                                                                                                                                                                                                                                                                                                                                                                                                                                                | scaffold_2_mRNA_4512.1           | C_unshiu_00107_mRNA_27.1     | -                               |
| GF0020759 | 1                             | 1                         | 0                            | Dopamine beta-monoxygenase, putative (1); Eukaryotic cytochrome b561 protein (1)     | integral component of membrane [GO:0016021 cellular_component] (1)                                                                                                                                                                                                                                                                                                                                                                                                                                                                                       | Cytochrome b561/ferrous reductase transmembrane [IPRO06593] (2); Cytochrome b561 domain [IPRO04877] (1)                                                                                                                                                                                                                                                                                                                                                                                                   | scaffold_2_mRNA_4505.1           | C_unshiu_00048_mRNA_70.1     | -                               |
| GF0020758 | 1                             | 1                         | 0                            | Hypothetical protein (2)                                                             |                                                                                                                                                                                                                                                                                                                                                                                                                                                                                                                                                          |                                                                                                                                                                                                                                                                                                                                                                                                                                                                                                           | scaffold_2_mRNA_4504.1           | C_unshiu_00048_mRNA_71.1     | -                               |
| GF0020757 | 1                             | 1                         | 0                            | Hypothetical protein (2)                                                             |                                                                                                                                                                                                                                                                                                                                                                                                                                                                                                                                                          |                                                                                                                                                                                                                                                                                                                                                                                                                                                                                                           | scaffold_2_mRNA_4500.1           | C_unshiu_00048_mRNA_75.1     | -                               |
| GF0020756 | 1                             | 1                         | 0                            | Hypothetical protein (2)                                                             |                                                                                                                                                                                                                                                                                                                                                                                                                                                                                                                                                          |                                                                                                                                                                                                                                                                                                                                                                                                                                                                                                           | scaffold_2_mRNA_450.1            | C_unshiu_01757_mRNA_8.1      | -                               |
| GF0020755 | 1                             | 1                         | 0                            | superfamily protein isoform 2 (1); 3-beta hydroxysteroid dehydrogenase/isomerase (1) | NAD(P)-binding Rossmann-fold [GO:0000166 molecular_function] (2)                                                                                                                                                                                                                                                                                                                                                                                                                                                                                         | NAD(P)-binding domain [IPRO16040] (2)                                                                                                                                                                                                                                                                                                                                                                                                                                                                     | scaffold_2_mRNA_4499.1           | C_unshiu_00048_mRNA_76.1     | -                               |
| GF0020754 | 1                             | 1                         | 0                            | Hypothetical protein (2)                                                             | protein dimerization activity [GO:0046983 molecular_function] (2); DNA binding [GO:0003677 molecular_function] (2)                                                                                                                                                                                                                                                                                                                                                                                                                                       | Transcription factor, MADS-box [IPRO02100] (2)                                                                                                                                                                                                                                                                                                                                                                                                                                                            | scaffold_2_mRNA_4492.1           | C_unshiu_00048_mRNA_81.1     | -                               |
| GF0020752 | 1                             | 1                         | 0                            | Glycosyl hydrolase family protein (2)                                                | hydrolase activity, hydrolyzing O-glycosyl compounds [GO:0004553 molecular_function] (2); carbohydrate metabolic process [GO:0005975 biological_process] (2)                                                                                                                                                                                                                                                                                                                                                                                             | Glycoside hydrolase family 3 C-terminal domain [IPRO02772] (2); Glycoside hydrolase, family 3, N-terminal [IPRO01764] (2); Fibronectin type III-like domain [IPRO08891] (2); Glycoside hydrolase superfamily [IPRO17853] (2); Immunoglobulin-like fold [IPRO13783] (1); Glycoside hydrolase family 3 [IPRO26892] (1)                                                                                                                                                                                      | scaffold_2_mRNA_4486.1           | C_unshiu_00048_mRNA_86.1     | -                               |
| GF0020751 | 1                             | 1                         | 0                            | Hypothetical protein (2)                                                             |                                                                                                                                                                                                                                                                                                                                                                                                                                                                                                                                                          |                                                                                                                                                                                                                                                                                                                                                                                                                                                                                                           | scaffold_2_mRNA_4484.1           | C_unshiu_00048_mRNA_88.1     | -                               |
| GF0020750 | 1                             | 1                         | 0                            | Hypothetical protein (2)                                                             |                                                                                                                                                                                                                                                                                                                                                                                                                                                                                                                                                          |                                                                                                                                                                                                                                                                                                                                                                                                                                                                                                           | scaffold_2_mRNA_4482.1           | C_unshiu_00048_mRNA_91.1     | -                               |
| GF0020749 | 1                             | 1                         | 0                            | Hypothetical protein (2)                                                             |                                                                                                                                                                                                                                                                                                                                                                                                                                                                                                                                                          |                                                                                                                                                                                                                                                                                                                                                                                                                                                                                                           | scaffold_2_mRNA_448.1            | C_unshiu_00244_mRNA_17.1     | -                               |
| GF0020748 | 1                             | 1                         | 0                            | RNA recognition motif 2 in plant MEI2-like protein (2)                               | nucleic acid binding [GO:0003676 molecular_function] (2); nucleotide binding [GO:0000012 molecular_function] (1)                                                                                                                                                                                                                                                                                                                                                                                                                                         | RNA recognition motif domain [IPRO00504] (2); MEI2-like, RNA recognition motif 1 [IPRO34453] (1); RNA recognition motif 2 [IPRO07201] (1); MEI2-like, RNA recognition motif 3 [IPRO34454] (1); Nucleotide-binding alpha-beta plat domain [IPRO12677] (1); MEI2/MEI2-like, C-terminal RNA recognition motif [IPRO07201] (1)                                                                                                                                                                                | scaffold_2_mRNA_4462.1           | C_unshiu_00074_mRNA_33.1     | -                               |
| GF0020747 | 1                             | 1                         | 0                            | Hypothetical protein (2)                                                             |                                                                                                                                                                                                                                                                                                                                                                                                                                                                                                                                                          |                                                                                                                                                                                                                                                                                                                                                                                                                                                                                                           | scaffold_2_mRNA_446.1            | C_unshiu_00244_mRNA_21.1     | -                               |
| GF0020746 | 1                             | 1                         | 0                            | Bidirectional sugar transporter SWEET2 (2)                                           | integral component of membrane [GO:0016021 cellular_component] (2)                                                                                                                                                                                                                                                                                                                                                                                                                                                                                       | SWEET sugar transporter [IPRO04316] (2)                                                                                                                                                                                                                                                                                                                                                                                                                                                                   | scaffold_2_mRNA_4450.1           | C_unshiu_00002_mRNA_8.1      | -                               |
| GF0020745 | 1                             | 1                         | 0                            | Protein transporter Sec61 subunit alpha isoform 2 (2)                                | protein transport [GO:0015031 biological_process] (2); protein retention in ER lumen [GO:0006621 biological_process] (2); integral component of membrane [GO:0016021 cellular_component] (2); ER retention sequence binding [GO:0040923 molecular_function] (2); membrane [GO:0016020 cellular_component] (2)                                                                                                                                                                                                                                            | SecY conserved site [IPRO06059] (2); SecY/SEC61-alpha family [IPRO02208] (2); Translocon Sec61/SecY, plug domain [IPRO19561] (2); ER lumen protein retaining receptor [IPRO00133] (2); SecY subunit domain [IPRO23201] (2)                                                                                                                                                                                                                                                                                | scaffold_2_mRNA_4421.1           | C_unshiu_00002_mRNA_37.1     | -                               |
| GF0020744 | 1                             | 1                         | 0                            | Cellulose synthase (2)                                                               | cellular component (2); cellulose synthase (UDP-forming) activity [GO:0016760 molecular_function] (2); cellulose biosynthetic process [GO:0003244 biological_process] (2)                                                                                                                                                                                                                                                                                                                                                                                | Nucleotide-diphospho-sugar transferases [IPRO29044] (2); Zinc finger, RING-FYVE/PHD-type [IPRO13083] (2); Cellulose synthase, RING-type zinc finger [IPRO07934] (2); Cellulose synthase [IPRO01550] (2)                                                                                                                                                                                                                                                                                                   | scaffold_2_mRNA_4408.1           | C_unshiu_00002_mRNA_50.1     | -                               |
| GF0020741 | 1                             | 1                         | 0                            | Tig (2)                                                                              |                                                                                                                                                                                                                                                                                                                                                                                                                                                                                                                                                          | Conserved hypothetical protein CHP02058 [IPRO11719] (2); Tubulin FvZ, 2-layer sandwich domain [IPRO18316] (2)                                                                                                                                                                                                                                                                                                                                                                                             | scaffold_2_mRNA_4368.2           | C_unshiu_00002_mRNA_88.1     | -                               |
| GF0020738 | 1                             | 1                         | 0                            | Hypothetical protein (2)                                                             | protein binding [GO:0005515 molecular_function] (1)                                                                                                                                                                                                                                                                                                                                                                                                                                                                                                      | Pentapeptide repeat [IPRO02885] (2); Tetratricopeptide-like helical domain [IPRO11990] (1)                                                                                                                                                                                                                                                                                                                                                                                                                | scaffold_2_mRNA_4361.1           | C_unshiu_00002_mRNA_93.1     | -                               |
| GF0020737 | 1                             | 1                         | 0                            | Hypothetical protein (2)                                                             |                                                                                                                                                                                                                                                                                                                                                                                                                                                                                                                                                          |                                                                                                                                                                                                                                                                                                                                                                                                                                                                                                           | scaffold_2_mRNA_435.1            | C_unshiu_00244_mRNA_34.1     | -                               |
| GF0020736 | 1                             | 1                         | 0                            | ATP synthase mitochondrial F1 complex assembly factor 1 (2)                          | mitochondrion [GO:0005739 cellular_component] (2); protein complex assembly [GO:0006461 biological_process] (2)                                                                                                                                                                                                                                                                                                                                                                                                                                          | ATP11 [IPRO10591] (2)                                                                                                                                                                                                                                                                                                                                                                                                                                                                                     | scaffold_2_mRNA_4347.1           | C_unshiu_00002_mRNA_107.1    | -                               |
| GF0020735 | 1                             | 1                         | 0                            | Ethylene-responsive transcription factor ERF91 (2)                                   | regulation of transcription, DNA-templated [GO:0006355 biological_process] (2); transcription factor activity, sequence-specific DNA binding [GO:0003700 molecular_function] (2); DNA binding [GO:0003677 molecular_function] (2)                                                                                                                                                                                                                                                                                                                        | DNA-binding domain [IPRO16177] (2); AP2/ERF domain [IPRO01471] (2)                                                                                                                                                                                                                                                                                                                                                                                                                                        | scaffold_2_mRNA_4340.1           | C_unshiu_00002_mRNA_114.1    | -                               |
| GF0020734 | 1                             | 1                         | 0                            | Eugenol O-methyltransferase (1); O-methyltransferase ZRP4 (1)                        | O-methyltransferase activity [GO:0008171 molecular_function] (2); protein dimerization activity [GO:0046983 molecular_function] (2); methyltransferase activity [GO:0008168 molecular_function] (2)                                                                                                                                                                                                                                                                                                                                                      | Winged helix-helix DNA-binding domain [IPRO11991] (2); O-methyltransferase, family 2 [IPRO1077] (2); O-methyltransferase COMT-type [IPRO16461] (2); Protein of unknown function DUF599 [IPRO06747] (2); Plant methyltransferase dimerisation [IPRO12967] (2); S-adenosyl-L-methionine-dependent methyltransferase [IPRO29063] (2)                                                                                                                                                                         | scaffold_2_mRNA_4325.1           | C_unshiu_00004_mRNA_127.1    | -                               |
| GF0020733 | 1                             | 1                         | 0                            | MLO protein homolog 1 (2)                                                            | integral component of membrane [GO:0016021 cellular_component] (2); defense response [GO:0006952 biological_process] (2)                                                                                                                                                                                                                                                                                                                                                                                                                                 | Mlo-related protein [IPRO04326] (2)                                                                                                                                                                                                                                                                                                                                                                                                                                                                       | scaffold_2_mRNA_4323.1           | C_unshiu_00002_mRNA_129.1    | -                               |
| GF0020729 | 1                             | 1                         | 0                            | Hypothetical protein (2)                                                             |                                                                                                                                                                                                                                                                                                                                                                                                                                                                                                                                                          |                                                                                                                                                                                                                                                                                                                                                                                                                                                                                                           | scaffold_2_mRNA_4283.1           | C_unshiu_00310_mRNA_30.1     | -                               |
| GF0020728 | 1                             | 1                         | 0                            | 80S ribosomal protein L21, mitochondrial (2)                                         | structural constituent of ribosome [GO:0003735 molecular_function] (2); intracellular [GO:0005622 cellular_component] (2); translation [GO:0006412 biological_process] (2); ribosome [GO:0005840 cellular_component] (2); RNA binding [GO:0003723 molecular_function] (2)                                                                                                                                                                                                                                                                                | Ribosomal protein L21 [IPRO01787] (2); Ribosomal protein L21, conserved site [IPRO18288] (2); Ribosomal protein L21-like [IPRO28099] (2)                                                                                                                                                                                                                                                                                                                                                                  | scaffold_2_mRNA_4276.1           | C_unshiu_00002_mRNA_174.1    | -                               |
| GF0020727 | 1                             | 1                         | 0                            | Stems-specific protein TSFT1 (2)                                                     |                                                                                                                                                                                                                                                                                                                                                                                                                                                                                                                                                          | Domain of unknown function DUF3700 [IPRO24286] (2); Nucleophile aminohydrolase, N-terminal [IPRO29055] (2)                                                                                                                                                                                                                                                                                                                                                                                                | scaffold_2_mRNA_4259.1           | C_unshiu_00002_mRNA_192.1    | -                               |
| GF0020725 | 1                             | 1                         | 0                            | Serine/threonine-protein kinase receptor (2)                                         | protein phosphorylation [GO:0006468 biological_process] (2); protein kinase activity [GO:0004672 molecular_function] (2); ATP binding [GO:0005524 molecular_function] (2)                                                                                                                                                                                                                                                                                                                                                                                | Protein kinase domain [IPRO00719] (2); Protein kinase-like domain [IPRO011009] (2); Serine/threonine-protein kinase, active site [IPRO08271] (2); Protein kinase, ATP binding site [IPRO17441] (2); Concavulin A-like lectin glucanase domain [IPRO13320] (1); Serine/threonine/tyrosine-protein kinase, catalytic domain [IPRO01245] (1); Serine/threonine/tyrosine-specific protein kinase, catalytic domain [IPRO02290] (1); Serine-threonine/tyrosine-protein kinase catalytic domain [IPRO01245] (1) | scaffold_2_mRNA_4245.1           | C_unshiu_00002_mRNA_206.1    | -                               |
| GF0020722 | 1                             | 1                         | 0                            | Hypothetical protein (2)                                                             |                                                                                                                                                                                                                                                                                                                                                                                                                                                                                                                                                          |                                                                                                                                                                                                                                                                                                                                                                                                                                                                                                           | scaffold_2_mRNA_4218.1           | C_unshiu_00153_mRNA_13.1     | -                               |
| GF0020721 | 1                             | 1                         | 0                            | Hypothetical protein (2)                                                             |                                                                                                                                                                                                                                                                                                                                                                                                                                                                                                                                                          |                                                                                                                                                                                                                                                                                                                                                                                                                                                                                                           | scaffold_2_mRNA_421.1            | C_unshiu_00526_mRNA_4.1      | -                               |
| GF0020719 | 1                             | 1                         | 0                            | Nuclease S1 (2)                                                                      | hydrolase activity, acting on ester bonds [GO:0016788 molecular_function] (2); endonuclease activity [GO:0004519 molecular_function] (2); nucleic acid binding [GO:0003676 molecular_function] (2); DNA catabolic process [GO:0006308 biological_process] (2)                                                                                                                                                                                                                                                                                            | Phospholipase C/PI nuclease domain [IPRO08947] (2); S1/PI nuclease [IPRO03134] (2)                                                                                                                                                                                                                                                                                                                                                                                                                        | scaffold_2_mRNA_4203.1           | C_unshiu_00153_mRNA_24.1     | -                               |
| GF0020718 | 1                             | 1                         | 0                            | Hypothetical protein (2)                                                             |                                                                                                                                                                                                                                                                                                                                                                                                                                                                                                                                                          |                                                                                                                                                                                                                                                                                                                                                                                                                                                                                                           | scaffold_2_mRNA_420.1            | C_unshiu_00526_mRNA_2.1      | -                               |
| GF0020717 | 1                             | 1                         | 0                            | Hypothetical protein (2)                                                             |                                                                                                                                                                                                                                                                                                                                                                                                                                                                                                                                                          |                                                                                                                                                                                                                                                                                                                                                                                                                                                                                                           | scaffold_2_mRNA_419.1            | C_unshiu_00526_mRNA_1.1      | -                               |

| ID        | Num. in <i>C. celerans</i> | Num. in <i>C. acicola</i> | Num. in <i>P. putida</i> | Note                                                                                                                           | GO                                                                                                                                                                                                                                                                                                                                                            | InterPro                                                                                                                                                                                                                                                                                                                                                                                                                                         | Members in <i>C. celerans</i> | Members in <i>C. acicola</i> | Members in <i>P. putida</i> |
|-----------|----------------------------|---------------------------|--------------------------|--------------------------------------------------------------------------------------------------------------------------------|---------------------------------------------------------------------------------------------------------------------------------------------------------------------------------------------------------------------------------------------------------------------------------------------------------------------------------------------------------------|--------------------------------------------------------------------------------------------------------------------------------------------------------------------------------------------------------------------------------------------------------------------------------------------------------------------------------------------------------------------------------------------------------------------------------------------------|-------------------------------|------------------------------|-----------------------------|
| GF0020716 | 1                          | 1                         | 1                        | 0 F-box protein SKIP27 (2)                                                                                                     | protein binding [GO:0005515 molecular_function] (2)                                                                                                                                                                                                                                                                                                           | F-box domain [IPRO01810] (2)                                                                                                                                                                                                                                                                                                                                                                                                                     | scaffold_2_mRNA_4185.1        | C_unshiu_00153_mRNA_41.1     | -                           |
| GF0020715 | 1                          | 1                         | 1                        | 0 Hypothetical protein (2)                                                                                                     |                                                                                                                                                                                                                                                                                                                                                               |                                                                                                                                                                                                                                                                                                                                                                                                                                                  | scaffold_2_mRNA_4178.1        | C_unshiu_00153_mRNA_45.1     | -                           |
| GF0020714 | 1                          | 1                         | 1                        | 0 Hypothetical protein (2)                                                                                                     |                                                                                                                                                                                                                                                                                                                                                               |                                                                                                                                                                                                                                                                                                                                                                                                                                                  | scaffold_2_mRNA_416.1         | C_unshiu_00696_mRNA_3.1      | -                           |
| GF0020713 | 1                          | 1                         | 1                        | 0 B-box type zinc finger protein (2)                                                                                           | intracellular [GO:0005522 cellular_component] (2); zinc ion binding [GO:0008270 molecular_function] (2)                                                                                                                                                                                                                                                       | B-box-type zinc finger [IPRO00315] (2)                                                                                                                                                                                                                                                                                                                                                                                                           | scaffold_2_mRNA_4157.1        | C_unshiu_00070_mRNA_51.2     | -                           |
| GF0020712 | 1                          | 1                         | 1                        | 0 Hypothetical protein (2)                                                                                                     |                                                                                                                                                                                                                                                                                                                                                               |                                                                                                                                                                                                                                                                                                                                                                                                                                                  | scaffold_2_mRNA_412.1         | C_unshiu_01377_mRNA_3.1      | -                           |
| GF0020711 | 1                          | 1                         | 1                        | 0 Ubiquitin family protein (1); Polyubiquitin (1)                                                                              | protein binding [GO:0005515 molecular_function] (2)                                                                                                                                                                                                                                                                                                           | Ubiquitin-related domain [IPRO22071] (2); Ubiquitin [IPRO19861] (2); Ubiquitin conserved site [IPRO19954] (2); Ubiquitin domain [IPRO00626] (2)                                                                                                                                                                                                                                                                                                  | scaffold_2_mRNA_4112.1        | C_unshiu_00027_mRNA_4.1      | -                           |
| GF0020710 | 1                          | 1                         | 1                        | 0 Thiazole biosynthetic enzyme (2)                                                                                             | thiamine biosynthetic process [GO:0009228 biological_process] (2); oxidation-reduction process [GO:0055114 biological_process] (2); oxidoreductase activity [GO:0016491 molecular_function] (2); response to stress [GO:0006950 biological_process] (2)                                                                                                       | Thiamine thiazole synthase [IPRO27495] (2); Thiazole biosynthetic enzyme Thi4 family [IPRO02922] (2); FAD/NAD(P)-binding domain [IPRO23755] (2)                                                                                                                                                                                                                                                                                                  | scaffold_2_mRNA_4109.1        | C_unshiu_00027_mRNA_7.1      | -                           |
| GF0020709 | 1                          | 1                         | 1                        | 0 Probable dolichyl-diphosphoglycosyltransferase subunit 3B (1); Probable dolichyl-diphosphoglycosyltransferase subunit 3A (1) |                                                                                                                                                                                                                                                                                                                                                               | Oligosaccharyl transferase complex, subunit OST3/OST6 [IPRO21149] (2)                                                                                                                                                                                                                                                                                                                                                                            | scaffold_2_mRNA_4107.1        | C_unshiu_00027_mRNA_9.1      | -                           |
| GF0020708 | 1                          | 1                         | 1                        | 0 Hypothetical protein (2)                                                                                                     | nucleic acid binding [GO:0003676 molecular_function] (1)                                                                                                                                                                                                                                                                                                      | Ribonuclease H-like domain [IPRO12337] (1)                                                                                                                                                                                                                                                                                                                                                                                                       | scaffold_2_mRNA_410.1         | C_unshiu_01377_mRNA_2.1      | -                           |
| GF0020706 | 1                          | 1                         | 1                        | 0 Tobacco virus multiplication 1 (2)                                                                                           |                                                                                                                                                                                                                                                                                                                                                               | Domain of unknown function DUF1084 [IPRO09457] (2)                                                                                                                                                                                                                                                                                                                                                                                               | scaffold_2_mRNA_4088.1        | C_unshiu_00027_mRNA_30.1     | -                           |
| GF0020702 | 1                          | 1                         | 1                        | 0 Hypothetical protein (2)                                                                                                     |                                                                                                                                                                                                                                                                                                                                                               |                                                                                                                                                                                                                                                                                                                                                                                                                                                  | scaffold_2_mRNA_406.1         | C_unshiu_01196_mRNA_2.1      | -                           |
| GF0020701 | 1                          | 1                         | 1                        | 0 CBL-interacting serine/threonine-protein kinase 9 (2)                                                                        | signal transduction [GO:0007165 biological_process] (2); ATP binding [GO:0005524 molecular_function] (2); protein phosphorylation [GO:0006468 biological_process] (2); protein kinase activity [GO:0004672 molecular_function] (2)                                                                                                                            | Protein kinase domain [IPRO00719] (2); NAF domain [IPRO04041] (2); NAF/BSL domain [IPRO1451] (2); Protein kinase-like domain [IPRO11009] (2); Protein kinase, ATP binding site [IPRO17441] (2); Serine/threonine-protein kinase, active site [IPRO0271] (2); KA1 domain/Sp2, C-terminal [IPRO28375] (1); Serine/threonine/dual specificity protein kinase, catalytic domain [IPRO12290] (1)                                                      | scaffold_2_mRNA_4053.3        | C_unshiu_00027_mRNA_66.3     | -                           |
| GF0020699 | 1                          | 1                         | 1                        | 0 Hypothetical protein (2)                                                                                                     |                                                                                                                                                                                                                                                                                                                                                               | Leucine-rich repeat domain, L domain-like [IPRO32675] (1)                                                                                                                                                                                                                                                                                                                                                                                        | scaffold_2_mRNA_4018.1        | C_unshiu_00091_mRNA_52.1     | -                           |
| GF0020696 | 1                          | 1                         | 1                        | 0 Hypothetical protein (2)                                                                                                     |                                                                                                                                                                                                                                                                                                                                                               |                                                                                                                                                                                                                                                                                                                                                                                                                                                  | scaffold_2_mRNA_400.1         | C_unshiu_00246_mRNA_2.1      | -                           |
| GF0020695 | 1                          | 1                         | 1                        | 0 Putative oxidoreductase GLYR1 (2)                                                                                            | 3-hydroxyisobutyrate dehydrogenase activity [GO:0008442 molecular_function] (2); NAD binding [GO:0051287 molecular_function] (2); oxidoreductase activity [GO:0016491 molecular_function] (2); oxidation-reduction process [GO:0055114 biological_process] (2); phosphogluconate dehydrogenase (decarboxylating) activity [GO:0004616 molecular_function] (2) | 3-hydroxyisobutyrate dehydrogenase-related, conserved site [IPRO02204] (2); 3-hydroxyisobutyrate dehydrogenase [IPRO1548] (2); NAD(P)-binding domain [IPRO1640] (2); 6-phosphogluconate dehydrogenase, NADP-binding [IPRO06115] (2); 3-hydroxyisobutyrate dehydrogenase, NAD-binding domain [IPRO29154] (2); 6-phosphogluconate dehydrogenase C-terminal domain-like [IPRO08927] (2); 6-phosphogluconate dehydrogenase, domain 2 [IPRO13328] (2) | scaffold_2_mRNA_3993.1        | C_unshiu_00091_mRNA_25.1     | -                           |
| GF0020694 | 1                          | 1                         | 1                        | 0 Hypothetical protein (2)                                                                                                     |                                                                                                                                                                                                                                                                                                                                                               |                                                                                                                                                                                                                                                                                                                                                                                                                                                  | scaffold_2_mRNA_3985.1        | C_unshiu_00091_mRNA_17.1     | -                           |
| GF0020693 | 1                          | 1                         | 1                        | 0 FAD-binding Berberine family protein (2)                                                                                     | oxidation-reduction process [GO:0055114 biological_process] (2); oxidoreductase activity [GO:0016491 molecular_function] (2); flavin adenine dinucleotide binding [GO:0050660 molecular_function] (2); catalytic activity [GO:0003824 molecular_function] (2); oxidoreductase activity, acting on CH-OH group of donors [GO:0016614 molecular_function] (2)   | FAD-binding, type 2, subdomain 1 [IPRO16167] (2); CO-aldohydrogenase flavoprotein-like, FAD-binding, subdomain 2 [IPRO16169] (2); FAD linked oxidase, N-terminal [IPRO06094] (2); FAD-binding type 2 [IPRO16166] (2); Berberine/berberine-like [IPRO12951] (2)                                                                                                                                                                                   | scaffold_2_mRNA_3968.1        | C_unshiu_00143_mRNA_8.1      | -                           |
| GF0020692 | 1                          | 1                         | 1                        | 0 Toprim domain-containing protein 0 isoform 1 (1); Toprim domain-containing protein (1)                                       | ATP binding [GO:0005524 molecular_function] (2); DNA helicase activity [GO:0003678 molecular_function] (2); DNA replication [GO:0006269 biological_process] (2); 5' to 3' DNA helicase activity [GO:0043139 molecular_function] (1); single-stranded DNA binding [GO:0003697 molecular_function] (1)                                                          | DNA helicase, DnaB-like, C-terminal [IPRO07694] (2); P-loop containing nucleoside triphosphate hydrolase [IPRO27417] (2); Toprim domain [IPRO06171] (1); Archaeal primase, DnaG/twinkle, TOPRIM domain [IPRO34154] (1); TOPRIM domain [IPRO06171] (1); Twinkle-like protein [IPRO27032] (1)                                                                                                                                                      | scaffold_2_mRNA_3961.1        | C_unshiu_00143_mRNA_12.1     | -                           |
| GF0020691 | 1                          | 1                         | 1                        | 0 Receptor-like serine/threonine-protein kinase ALK2 (2)                                                                       | ATP binding [GO:0005524 molecular_function] (2); protein kinase activity [GO:0004672 molecular_function] (2); protein phosphorylation [GO:0006468 biological_process] (2); protein binding [GO:0005515 molecular_function] (2)                                                                                                                                | Leucine-rich repeat [IPRO01611] (2); Protein kinase-like domain [IPRO11009] (2); Leucine-rich repeat domain, L domain-like [IPRO32675] (2); Protein kinase domain [IPRO00719] (2); Serine/threonine/tyrosine-protein kinase catalytic domain [IPRO01245] (1); Serine/threonine/tyrosine-protein kinase, catalytic domain [IPRO01245] (1); Concavalin A-like lectin/galactanase domain [IPRO13320] (1)                                            | scaffold_2_mRNA_3959.1        | C_unshiu_00143_mRNA_14.1     | -                           |
| GF0020688 | 1                          | 1                         | 1                        | 0 Hypothetical protein (2)                                                                                                     |                                                                                                                                                                                                                                                                                                                                                               |                                                                                                                                                                                                                                                                                                                                                                                                                                                  | scaffold_2_mRNA_395.1         | C_unshiu_00246_mRNA_6.1      | -                           |
| GF0020687 | 1                          | 1                         | 1                        | 0 Hypothetical protein (2)                                                                                                     |                                                                                                                                                                                                                                                                                                                                                               |                                                                                                                                                                                                                                                                                                                                                                                                                                                  | scaffold_2_mRNA_3942.1        | C_unshiu_00143_mRNA_27.1     | -                           |
| GF0020686 | 1                          | 1                         | 1                        | 0 Charged multivesicular body protein 2a (1); Charged multivesicular body protein 2b-4b, putative (1)                          | vacuolar transport [GO:0007034 biological_process] (2)                                                                                                                                                                                                                                                                                                        | Sn7 family [IPRO05024] (2); Zinc finger, LSD1-type [IPRO05735] (1)                                                                                                                                                                                                                                                                                                                                                                               | scaffold_2_mRNA_3941.1        | C_unshiu_00143_mRNA_28.1     | -                           |
| GF0020685 | 1                          | 1                         | 1                        | 0 Hypothetical protein (1); Putative retroelement pol polyprotein (1)                                                          |                                                                                                                                                                                                                                                                                                                                                               |                                                                                                                                                                                                                                                                                                                                                                                                                                                  | scaffold_2_mRNA_3919.1        | C_unshiu_00143_mRNA_49.1     | -                           |
| GF0020684 | 1                          | 1                         | 1                        | 0 Hypothetical protein (2)                                                                                                     |                                                                                                                                                                                                                                                                                                                                                               |                                                                                                                                                                                                                                                                                                                                                                                                                                                  | scaffold_2_mRNA_3911.1        | C_unshiu_00125_mRNA_60.1     | -                           |
| GF0020683 | 1                          | 1                         | 1                        | 0 Hypothetical protein (2)                                                                                                     |                                                                                                                                                                                                                                                                                                                                                               |                                                                                                                                                                                                                                                                                                                                                                                                                                                  | scaffold_2_mRNA_3903.1        | C_unshiu_00125_mRNA_50.1     | -                           |
| GF0020682 | 1                          | 1                         | 1                        | 0 Hypothetical protein (1); Monosaccharide transport protein (1)                                                               |                                                                                                                                                                                                                                                                                                                                                               |                                                                                                                                                                                                                                                                                                                                                                                                                                                  | scaffold_2_mRNA_3882.1        | C_unshiu_00125_mRNA_29.1     | -                           |
| GF0020681 | 1                          | 1                         | 1                        | 0 ZMW resistance protein N (1); Putative TIR-NBS type R protein 4 (1)                                                          | protein binding [GO:0005515 molecular_function] (2); ADP binding [GO:0045311 molecular_function] (2); signal transduction [GO:0007165 biological_process] (2)                                                                                                                                                                                                 | Toll/interleukin-1 receptor homology (TIR) domain [IPRO00157] (2); Winged helix-helix DNA-binding domain [IPRO11991] (2); Leucine-rich repeat domain, L domain-like [IPRO32675] (2); P-loop containing nucleoside triphosphate hydrolase [IPRO27417] (2); NB-ARC [IPRO02182] (2)                                                                                                                                                                 | scaffold_2_mRNA_3868.1        | C_unshiu_02276_mRNA_3.1      | -                           |
| GF0020680 | 1                          | 1                         | 1                        | 0 Hypothetical protein (2)                                                                                                     | carbohydrate binding [GO:0003026 molecular_function] (1); catalytic activity [GO:0003824 molecular_function] (1); carbohydrate metabolic process [GO:0055975 biological_process] (1)                                                                                                                                                                          | Galactose mutarotase-like domain [IPRO11013] (1); Galactose mutarotase, N-terminal barrel [IPRO31727] (1)                                                                                                                                                                                                                                                                                                                                        | scaffold_2_mRNA_3867.1        | C_unshiu_02276_mRNA_4.1      | -                           |
| GF0020679 | 1                          | 1                         | 1                        | 0 Hypothetical protein (2)                                                                                                     | nucleic acid binding [GO:0003676 molecular_function] (2)                                                                                                                                                                                                                                                                                                      | Ribonuclease H-like domain [IPRO12337] (2)                                                                                                                                                                                                                                                                                                                                                                                                       | scaffold_2_mRNA_3865.1        | C_unshiu_02276_mRNA_5.1      | -                           |
| GF0020678 | 1                          | 1                         | 1                        | 0 Hypothetical protein (2)                                                                                                     | protein dimerization activity [GO:0046983 molecular_function] (2); DNA binding [GO:0003677 molecular_function] (2)                                                                                                                                                                                                                                            | Transcription factor, MADS-box [IPRO02100] (2)                                                                                                                                                                                                                                                                                                                                                                                                   | scaffold_2_mRNA_3859.1        | C_unshiu_00185_mRNA_13.1     | -                           |
| GF0020677 | 1                          | 1                         | 1                        | 0 Hypothetical protein (2)                                                                                                     |                                                                                                                                                                                                                                                                                                                                                               | Leucine-rich repeat domain, L domain-like [IPRO32675] (1)                                                                                                                                                                                                                                                                                                                                                                                        | scaffold_2_mRNA_3857.1        | C_unshiu_00185_mRNA_14.1     | -                           |
| GF0020676 | 1                          | 1                         | 1                        | 0 Hypothetical protein (2)                                                                                                     |                                                                                                                                                                                                                                                                                                                                                               | Domain of unknown function DUF239 [IPRO04314] (1); Neprosin [IPRO04314] (1)                                                                                                                                                                                                                                                                                                                                                                      | scaffold_2_mRNA_3853.1        | C_unshiu_00185_mRNA_18.1     | -                           |
| GF0020675 | 1                          | 1                         | 1                        | 0 Hypothetical protein (2)                                                                                                     |                                                                                                                                                                                                                                                                                                                                                               | Ribosomal protein S25 [IPRO04977] (2)                                                                                                                                                                                                                                                                                                                                                                                                            | scaffold_2_mRNA_385.1         | C_unshiu_00246_mRNA_16.1     | -                           |
| GF0020674 | 1                          | 1                         | 1                        | 0 14 kDa zinc-binding protein (2)                                                                                              | catalytic activity [GO:0003824 molecular_function] (2)                                                                                                                                                                                                                                                                                                        | HTT-like domain [IPRO1146] (2); Histidine triad (HT) protein [IPRO01310] (2); Histidine triad, conserved site [IPRO19808] (2)                                                                                                                                                                                                                                                                                                                    | scaffold_2_mRNA_3843.1        | C_unshiu_00185_mRNA_29.1     | -                           |
| GF0020673 | 1                          | 1                         | 1                        | 0 Vericillin wilt resistance-like protein (2)                                                                                  | protein binding [GO:0005515 molecular_function] (2)                                                                                                                                                                                                                                                                                                           | Leucine-rich repeat domain, L domain-like [IPRO32675] (2); Leucine-rich repeat, typical subtype [IPRO03591] (2); Leucine-rich repeat [IPRO01611] (2)                                                                                                                                                                                                                                                                                             | scaffold_2_mRNA_3841.1        | C_unshiu_00185_mRNA_31.1     | -                           |
| GF0020672 | 1                          | 1                         | 1                        | 0 Receptor like protein 33 (2)                                                                                                 | protein binding [GO:0005515 molecular_function] (2)                                                                                                                                                                                                                                                                                                           | Leucine-rich repeat, typical subtype [IPRO03591] (2); Leucine-rich repeat domain, L domain-like [IPRO32675] (2); Leucine-rich repeat [IPRO01611] (2)                                                                                                                                                                                                                                                                                             | scaffold_2_mRNA_3836.1        | C_unshiu_00185_mRNA_35.1     | -                           |
| GF0020671 | 1                          | 1                         | 1                        | 0 Hypothetical protein (2)                                                                                                     | RNA-DNA hybrid ribonuclease activity [GO:0004523 molecular_function] (2); nucleic acid binding [GO:0003676 molecular_function] (2)                                                                                                                                                                                                                            | Ribonuclease H-like domain [IPRO12337] (2); Ribonuclease H domain [IPRO02156] (2)                                                                                                                                                                                                                                                                                                                                                                | scaffold_2_mRNA_3834.1        | C_unshiu_02643_mRNA_3.1      | -                           |
| GF0020670 | 1                          | 1                         | 1                        | 0 Monosaccharide transport protein (2)                                                                                         |                                                                                                                                                                                                                                                                                                                                                               |                                                                                                                                                                                                                                                                                                                                                                                                                                                  | scaffold_2_mRNA_3832.1        | C_unshiu_00185_mRNA_39.1     | -                           |
| GF0020668 | 1                          | 1                         | 1                        | 0 Phospholipase, patatin family (2)                                                                                            | metabolic process [GO:0008152 biological_process] (2); lipid metabolic process [GO:0006629 biological_process] (2)                                                                                                                                                                                                                                            | Acyl transferase/acyl hydrolase/lysophospholipase [IPRO16035] (2); Patatin-like phospholipase domain [IPRO02641] (1); Patatin/Phospholipase A2-related [IPRO02641] (1)                                                                                                                                                                                                                                                                           | scaffold_2_mRNA_3826.1        | C_unshiu_00185_mRNA_45.1     | -                           |
| GF0020667 | 1                          | 1                         | 1                        | 0 Hypothetical protein (2)                                                                                                     |                                                                                                                                                                                                                                                                                                                                                               |                                                                                                                                                                                                                                                                                                                                                                                                                                                  | scaffold_2_mRNA_3824.1        | C_unshiu_00185_mRNA_46.1     | -                           |
| GF0020666 | 1                          | 1                         | 1                        | 0 Hypothetical protein (2)                                                                                                     |                                                                                                                                                                                                                                                                                                                                                               |                                                                                                                                                                                                                                                                                                                                                                                                                                                  | scaffold_2_mRNA_3821.1        | C_unshiu_00185_mRNA_47.1     | -                           |
| GF0020665 | 1                          | 1                         | 1                        | 0 Hypothetical protein (2)                                                                                                     |                                                                                                                                                                                                                                                                                                                                                               |                                                                                                                                                                                                                                                                                                                                                                                                                                                  | scaffold_2_mRNA_3822.1        | C_unshiu_00185_mRNA_48.1     | -                           |

| ID        | Num. in <i>C. clementinae</i> | Num. in <i>C. acutis</i> | Num. in <i>P. trifoliata</i> | Note                                                                                                              | GO                                                                                                                                                                                                                                                                                                                                                                                                         | InterPro                                                                                                                                                                                                                                                                                                                                                        | Members in <i>C. clementinae</i> | Members in <i>C. acutis</i> | Members in <i>P. trifoliata</i> |
|-----------|-------------------------------|--------------------------|------------------------------|-------------------------------------------------------------------------------------------------------------------|------------------------------------------------------------------------------------------------------------------------------------------------------------------------------------------------------------------------------------------------------------------------------------------------------------------------------------------------------------------------------------------------------------|-----------------------------------------------------------------------------------------------------------------------------------------------------------------------------------------------------------------------------------------------------------------------------------------------------------------------------------------------------------------|----------------------------------|-----------------------------|---------------------------------|
| GF0020664 | 1                             | 1                        | 1                            | 0 Hypothetical protein (2)                                                                                        | protein binding [GO:0005515 molecular_function] (2)                                                                                                                                                                                                                                                                                                                                                        | Ankyrin repeat [IPRO02110] (2); PGG domain [IPRO36961] (2); Ankyrin repeat-containing domain [IPRO20683] (2)                                                                                                                                                                                                                                                    | scaffold_2_mRNA_3821.1           | C_umshiu_00185_mRNA_49.1    | -                               |
| GF0020663 | 1                             | 1                        | 1                            | 0 Hypothetical protein (2)                                                                                        |                                                                                                                                                                                                                                                                                                                                                                                                            |                                                                                                                                                                                                                                                                                                                                                                 | scaffold_2_mRNA_3819.1           | C_umshiu_00185_mRNA_51.1    | -                               |
| GF0020662 | 1                             | 1                        | 1                            | 0 Hypothetical protein (2)                                                                                        |                                                                                                                                                                                                                                                                                                                                                                                                            |                                                                                                                                                                                                                                                                                                                                                                 | scaffold_2_mRNA_3813.1           | C_umshiu_00073_mRNA_65.1    | -                               |
| GF0020660 | 1                             | 1                        | 1                            | 0 Urease accessory protein D (2)                                                                                  | nickel cation binding [GO:0016151 molecular_function] (2); nitrogen compound metabolic process [GO:0006807 biological_process] (2)                                                                                                                                                                                                                                                                         | Urease accessory protein UrdD [IPRO02669] (2)                                                                                                                                                                                                                                                                                                                   | scaffold_2_mRNA_3805.1           | C_umshiu_00073_mRNA_57.1    | -                               |
| GF0020659 | 1                             | 1                        | 1                            | 0 Putative 54S ribosomal protein L12, mitochondrial-like (2)                                                      | intracellular [GO:0005622 cellular_component] (2); translation [GO:0006412 biological_process] (2); ribosome [GO:0005840 cellular_component] (2)                                                                                                                                                                                                                                                           | Ribosomal protein L7/L12 [IPRO00206] (2); Ribosomal protein L7/L12, C-terminal/adaptor protein Cps5-like [IPRO14719] (2); Ribosomal protein L7/L12, C-terminal [IPRO13823] (2)                                                                                                                                                                                  | scaffold_2_mRNA_3804.1           | C_umshiu_00073_mRNA_56.1    | -                               |
| GF0020658 | 1                             | 1                        | 1                            | 0 Poly(A) polymerase 1 isoform 1 (2)                                                                              | nucleotidyltransferase activity [GO:0016779 molecular_function] (2); RNA 3'-end processing [GO:0031123 biological_process] (2); nucleus [GO:0005634 cellular_component] (2); RNA binding [GO:0003723 molecular_function] (2); polynucleotide adenylyltransferase activity [GO:0004652 molecular_function] (2); RNA polyadenylation [GO:0004831 biological_process] (2)                                     | Poly(A) polymerase, RNA-binding domain [IPRO07010] (2); Polymerase, nucleotidyl transferase domain [IPRO02934] (2); Poly(A) polymerase, central domain [IPRO07012] (2); Poly(A) polymerase [IPRO14992] (2); Nucleotidyltransferase, class I, C-terminal-like [IPRO11068] (2)                                                                                    | scaffold_2_mRNA_3801.1           | C_umshiu_00073_mRNA_53.1    | -                               |
| GF0020657 | 1                             | 1                        | 1                            | 0 Hypothetical protein (2)                                                                                        | nucleic acid binding [GO:0003676 molecular_function] (1)                                                                                                                                                                                                                                                                                                                                                   | Ribonuclease H-like domain [IPRO12373] (1)                                                                                                                                                                                                                                                                                                                      | scaffold_2_mRNA_3762.1           | C_umshiu_00073_mRNA_13.1    | -                               |
| GF0020656 | 1                             | 1                        | 1                            | 0 LOB domain-containing protein 6 (2)                                                                             |                                                                                                                                                                                                                                                                                                                                                                                                            | Lateral organ boundaries, LOB [IPRO04883] (2)                                                                                                                                                                                                                                                                                                                   | scaffold_2_mRNA_3731.1           | C_umshiu_00055_mRNA_11.1    | -                               |
| GF0020655 | 1                             | 1                        | 1                            | 0 Hypothetical protein (2)                                                                                        |                                                                                                                                                                                                                                                                                                                                                                                                            |                                                                                                                                                                                                                                                                                                                                                                 | scaffold_2_mRNA_373.1            | C_umshiu_00246_mRNA_28.1    | -                               |
| GF0020654 | 1                             | 1                        | 1                            | 0 Hypothetical protein (2)                                                                                        | catalytic activity [GO:0003824 molecular_function] (2); carbohydrate metabolic process [GO:0005975 biological_process] (2); hydrolase activity, hydrolyzing O-glycosyl compounds [GO:0004553 molecular_function] (2)                                                                                                                                                                                       | Glycoside hydrolase superfamily [IPRO17833] (2); Aldolase-type TIM barrel [IPRO13785] (2); Glycoside hydrolase, family 27 [IPRO02241] (2); Glycoside hydrolase family 27/36, conserved site [IPRO00111] (1)                                                                                                                                                     | scaffold_2_mRNA_3721.1           | C_umshiu_00022_mRNA_80.1    | -                               |
| GF0020653 | 1                             | 1                        | 1                            | 0 WD repeat-containing protein 26 (2)                                                                             | protein binding [GO:0005515 molecular_function] (2)                                                                                                                                                                                                                                                                                                                                                        | WD40-repeat-containing domain [IPRO17986] (2); WD40 repeat [IPRO01680] (2); WD40 repeat, conserved site [IPRO19775] (2); WD40/YVTN repeat-like-containing domain [IPRO15943] (2); G-protein beta WD-40 repeat [IPRO20472] (2); C-terminal LisH motif [IPRO06595] (2); LIS1 homology motif [IPRO06594] (2); Six-bladed beta-propeller, TolB-like [IPRO11042] (1) | scaffold_2_mRNA_3720.2           | C_umshiu_00022_mRNA_79.1    | -                               |
| GF0020652 | 1                             | 1                        | 1                            | 0 Retrotransposon protein, putative, Ty1-copia subclass (2)                                                       | zinc ion binding [GO:0008270 molecular_function] (2); nucleic acid binding [GO:0003676 molecular_function] (2)                                                                                                                                                                                                                                                                                             | Zinc finger, CCHC-type [IPRO01878] (2); Ribonuclease H-like domain [IPRO12337] (1)                                                                                                                                                                                                                                                                              | scaffold_2_mRNA_372.1            | C_umshiu_00246_mRNA_29.1    | -                               |
| GF0020651 | 1                             | 1                        | 1                            | 0 Hypothetical protein (2)                                                                                        |                                                                                                                                                                                                                                                                                                                                                                                                            |                                                                                                                                                                                                                                                                                                                                                                 | scaffold_2_mRNA_3702.1           | C_umshiu_00022_mRNA_61.1    | -                               |
| GF0020650 | 1                             | 1                        | 1                            | 0 Hypothetical protein (2)                                                                                        |                                                                                                                                                                                                                                                                                                                                                                                                            | Rossmann-like alpha/beta/alpha sandwich fold [IPRO14729] (2)                                                                                                                                                                                                                                                                                                    | scaffold_2_mRNA_3690.1           | C_umshiu_00022_mRNA_49.1    | -                               |
| GF0020649 | 1                             | 1                        | 1                            | 0 Hypothetical protein (2)                                                                                        |                                                                                                                                                                                                                                                                                                                                                                                                            | Gag-polypeptide of LTR copia-type [IPRO29472] (1)                                                                                                                                                                                                                                                                                                               | scaffold_2_mRNA_369.1            | C_umshiu_00836_mRNA_6.1     | -                               |
| GF0020648 | 1                             | 1                        | 1                            | 0 Kinase superfamily protein (2)                                                                                  | polysaccharide binding [GO:0030247 molecular_function] (2)                                                                                                                                                                                                                                                                                                                                                 | Wall-associated receptor kinase, galacturonin-binding domain [IPRO25277] (2); Wall-associated receptor kinase, C-terminal [IPRO32872] (2)                                                                                                                                                                                                                       | scaffold_2_mRNA_3668.1           | C_umshiu_00022_mRNA_27.1    | -                               |
| GF0020647 | 1                             | 1                        | 1                            | 0 Probable protein phosphatase 2C 15 (2)                                                                          | catalytic activity [GO:0003824 molecular_function] (2); protein dephosphorylation [GO:0006470 biological_process] (2); protein serine/threonine phosphatase activity [GO:0004722 molecular_function] (2); regulation of transcription, DNA-templated [GO:0006355 biological_process] (2); protein binding [GO:0005515 molecular_function] (2); nucleus [GO:0005634 cellular_component] (2)                 | Protein phosphatase 2C family [IPRO15655] (2); SH-2-type phosphatase domain [IPRO01932] (2)                                                                                                                                                                                                                                                                     | scaffold_2_mRNA_3664.1           | C_umshiu_00022_mRNA_21.1    | -                               |
| GF0020645 | 1                             | 1                        | 1                            | 0 Auxin-responsive protein IAA12 (2)                                                                              | AUX/IAA protein [GO:0003311] (2); PB1 domain [IPRO00270] (2); AUX/IAA domain [IPRO33389] (1)                                                                                                                                                                                                                                                                                                               | AUX/IAA protein [IPRO03311] (2); PB1 domain [IPRO00270] (2); AUX/IAA domain [IPRO33389] (1)                                                                                                                                                                                                                                                                     | scaffold_2_mRNA_3648.1           | C_umshiu_00022_mRNA_4.1     | -                               |
| GF0020639 | 1                             | 1                        | 1                            | 0 RING-U-box superfamily protein, putative isoform 4 (1); Hypothetical protein (1)                                | polysaccharide binding [GO:0030247 molecular_function] (1)                                                                                                                                                                                                                                                                                                                                                 | Wall-associated receptor kinase, galacturonin-binding domain [IPRO25277] (1)                                                                                                                                                                                                                                                                                    | scaffold_2_mRNA_3631.1           | C_umshiu_00965_mRNA_8.1     | -                               |
| GF0020638 | 1                             | 1                        | 1                            | 0 Hypothetical protein (2)                                                                                        |                                                                                                                                                                                                                                                                                                                                                                                                            | Zinc knuckle CXC4-4HX4C [IPRO25356] (2)                                                                                                                                                                                                                                                                                                                         | scaffold_2_mRNA_362.1            | C_umshiu_00672_mRNA_7.1     | -                               |
| GF0020636 | 1                             | 1                        | 1                            | 0 Hypothetical protein (2)                                                                                        |                                                                                                                                                                                                                                                                                                                                                                                                            | Zinc finger, RING/YFVE/PHD-type [IPRO13083] (2); Zinc finger, RING-type [IPRO18411] (2)                                                                                                                                                                                                                                                                         | scaffold_2_mRNA_361.1            | C_umshiu_00672_mRNA_6.1     | -                               |
| GF0020634 | 1                             | 1                        | 1                            | 0 E3 ubiquitin-protein ligase RHA2A (2)                                                                           | ATP binding [GO:0005524 molecular_function] (2); protein kinase activity [GO:0004672 molecular_function] (2); protein phosphorylation [GO:0006468 biological_process] (2)                                                                                                                                                                                                                                  | Protein kinase, ATP binding site [IPRO17441] (2); Protein kinase domain [IPRO00719] (2); Protein kinase-like domain [IPRO11009] (2); Serine/threonine dual specificity protein kinase, catalytic domain [IPRO02290] (1)                                                                                                                                         | scaffold_2_mRNA_3586.1           | C_umshiu_00064_mRNA_58.1    | -                               |
| GF0020633 | 1                             | 1                        | 1                            | 0 Hypothetical protein (2)                                                                                        | metal ion binding [GO:0046872 molecular_function] (2); metal ion transport [GO:0030000 biological_process] (2)                                                                                                                                                                                                                                                                                             | Heavy metal-associated domain, HMA [IPRO06121] (2)                                                                                                                                                                                                                                                                                                              | scaffold_2_mRNA_3582.1           | C_umshiu_00064_mRNA_54.1    | -                               |
| GF0020632 | 1                             | 1                        | 1                            | 0 Farnesylated protein 2 (2)                                                                                      |                                                                                                                                                                                                                                                                                                                                                                                                            | SANT/Myb domain [IPRO1005] (2); Multicopper oxidase, type 1 [IPRO11707] (2); Multicopper oxidase, type 1 [IPRO01117] (2); Myb-like domain [IPRO17877] (2); Multicopper oxidase, type 2 [IPRO11706] (2); Cuprodoxin domain [IPRO08972] (2); Homodomain-like [IPRO09057] (1); Homeobox domain-like [IPRO09057] (1)                                                | scaffold_2_mRNA_3551.1           | C_umshiu_00064_mRNA_19.1    | -                               |
| GF0020631 | 1                             | 1                        | 1                            | 0 Bilirubin oxidase (2)                                                                                           | oxidation-reduction process [GO:0055114 biological_process] (2); oxidoreductase activity [GO:0016491 molecular_function] (2); copper ion binding [GO:0005507 molecular_function] (2); DNA binding [GO:0003677 molecular_function] (2)                                                                                                                                                                      | Cytochrome P450 [IPRO01128] (2)                                                                                                                                                                                                                                                                                                                                 | scaffold_2_mRNA_3548.1           | C_umshiu_00064_mRNA_16.1    | -                               |
| GF0020630 | 1                             | 1                        | 1                            | 0 Hypothetical protein (2)                                                                                        | transporter activity [GO:0005215 molecular_function] (2); transmembrane transport [GO:0055085 biological_process] (2); integral component of membrane [GO:0016021 cellular_component] (2); substrate-specific transmembrane transporter activity [GO:0022891 molecular_function] (2); membrane [GO:0016020 cellular_component] (2); transmembrane transporter activity [GO:0022857 molecular_function] (2) | Sugar/finoxid transporter [IPRO03663] (2); Major facilitator, sugar transporter-like [IPRO05828] (2); Major facilitator superfamily domain [IPRO20846] (2); Sugar transporter, conserved site [IPRO05829] (2)                                                                                                                                                   | scaffold_2_mRNA_3545.1           | C_umshiu_00111_mRNA_44.1    | -                               |
| GF0020628 | 1                             | 1                        | 1                            | 0 Cytokinin riboside 5'-monophosphate phosphoribosyltransferase (2)                                               |                                                                                                                                                                                                                                                                                                                                                                                                            |                                                                                                                                                                                                                                                                                                                                                                 | scaffold_2_mRNA_353.1            | C_umshiu_00111_mRNA_43.1    | -                               |
| GF0020626 | 1                             | 1                        | 1                            | 0 Hypothetical protein (2)                                                                                        |                                                                                                                                                                                                                                                                                                                                                                                                            |                                                                                                                                                                                                                                                                                                                                                                 | scaffold_2_mRNA_352.1            | C_umshiu_00111_mRNA_41.1    | -                               |
| GF0020625 | 1                             | 1                        | 1                            | 0 Hypothetical protein (2)                                                                                        |                                                                                                                                                                                                                                                                                                                                                                                                            |                                                                                                                                                                                                                                                                                                                                                                 | scaffold_2_mRNA_3513.1           | C_umshiu_00017_mRNA_98.1    | -                               |
| GF0020624 | 1                             | 1                        | 1                            | 0 Hypothetical protein (2)                                                                                        |                                                                                                                                                                                                                                                                                                                                                                                                            |                                                                                                                                                                                                                                                                                                                                                                 | scaffold_2_mRNA_3512.1           | C_umshiu_00017_mRNA_97.1    | -                               |
| GF0020623 | 1                             | 1                        | 1                            | 0 Protein BCCIP homolog (2)                                                                                       |                                                                                                                                                                                                                                                                                                                                                                                                            | BCP1 family [IPRO25602] (2)                                                                                                                                                                                                                                                                                                                                     | scaffold_2_mRNA_3503.1           | C_umshiu_00017_mRNA_88.1    | -                               |
| GF0020622 | 1                             | 1                        | 1                            | 0 Hypothetical protein (2)                                                                                        | oxidoreductase activity, acting on paired donors, with incorporation or reduction of molecular oxygen [GO:0016705 molecular_function] (2); oxidation-reduction process [GO:0055114 biological_process] (2); iron ion binding [GO:0005506 molecular_function] (2); heme binding [GO:0020037 molecular_function] (2)                                                                                         | Cytochrome P450 [IPRO01128] (2)                                                                                                                                                                                                                                                                                                                                 | scaffold_2_mRNA_3488.1           | C_umshiu_00017_mRNA_75.1    | -                               |
| GF0020621 | 1                             | 1                        | 1                            | 0 Hypothetical protein (2)                                                                                        | DNA binding [GO:0003677 molecular_function] (1)                                                                                                                                                                                                                                                                                                                                                            | Myb-like domain [IPRO17877] (2); Homeodomain-like [IPRO09057] (1)                                                                                                                                                                                                                                                                                               | scaffold_2_mRNA_3483.1           | C_umshiu_00017_mRNA_70.1    | -                               |
| GF0020620 | 1                             | 1                        | 1                            | 0 Hypothetical protein (2)                                                                                        |                                                                                                                                                                                                                                                                                                                                                                                                            |                                                                                                                                                                                                                                                                                                                                                                 | scaffold_2_mRNA_3480.1           | C_umshiu_00017_mRNA_68.1    | -                               |
| GF0020619 | 1                             | 1                        | 1                            | 0 Hypothetical protein (2)                                                                                        |                                                                                                                                                                                                                                                                                                                                                                                                            |                                                                                                                                                                                                                                                                                                                                                                 | scaffold_2_mRNA_348.1            | C_umshiu_01893_mRNA_14.1    | -                               |
| GF0020618 | 1                             | 1                        | 1                            | 0 Hypothetical protein (2)                                                                                        |                                                                                                                                                                                                                                                                                                                                                                                                            |                                                                                                                                                                                                                                                                                                                                                                 | scaffold_2_mRNA_346.1            | C_umshiu_01893_mRNA_12.1    | -                               |
| GF0020617 | 1                             | 1                        | 1                            | 0 Hypothetical protein (2)                                                                                        |                                                                                                                                                                                                                                                                                                                                                                                                            | Cullin protein, neddylation domain [IPRO19559] (2); Winged helix-stem-helix DNA-binding domain [IPRO11991] (2)                                                                                                                                                                                                                                                  | scaffold_2_mRNA_3459.1           | C_umshiu_00017_mRNA_47.1    | -                               |
| GF0020616 | 1                             | 1                        | 1                            | 0 Protein FAR1-RELATED SEQUENCE 0 (1); Transposon protein, putative, unclassified, expressed (1)                  | regulation of transcription, DNA-templated [GO:0006355 biological_process] (2); zinc ion binding [GO:0008270 molecular_function] (1)                                                                                                                                                                                                                                                                       | MULE transposase domain [IPRO18289] (2); FHY3/FAR1 family [IPRO31052] (2); Zinc finger, PMZ-type [IPRO006564] (1); Zinc finger, SWIM-type [IPRO07527] (1)                                                                                                                                                                                                       | scaffold_2_mRNA_3457.1           | C_umshiu_01323_mRNA_1.1     | -                               |
| GF0020615 | 1                             | 1                        | 1                            | 0 1-aminocyclopropane-1-carboxylate oxidase homolog 12 (1); 1-aminocyclopropane-1-carboxylate oxidase like 12 (1) | oxidation-reduction process [GO:0055114 biological_process] (2); oxidoreductase activity [GO:0016491 molecular_function] (2)                                                                                                                                                                                                                                                                               | Isopenicillin N synthase-like [IPRO27443] (2); Non-haem desxygenase N-terminal domain [IPRO09923] (2); Osooglutarate/iron-dependent desxygenase [IPRO05123] (2)                                                                                                                                                                                                 | scaffold_2_mRNA_3454.1           | C_umshiu_00017_mRNA_46.1    | -                               |
| GF0020614 | 1                             | 1                        | 1                            | 0 Hypothetical protein (2)                                                                                        |                                                                                                                                                                                                                                                                                                                                                                                                            |                                                                                                                                                                                                                                                                                                                                                                 | scaffold_2_mRNA_344.1            | C_umshiu_01893_mRNA_10.1    | -                               |









| ID        | Num. in <i>C. caryophyllae</i> | Num. in <i>C. axinin</i> | Num. in <i>P. trifoliate</i> | Note | GO                                                                        | InterPro | Members in <i>C. caryophyllae</i> | Members in <i>C. axinin</i> | Members in <i>P. trifoliate</i> |
|-----------|--------------------------------|--------------------------|------------------------------|------|---------------------------------------------------------------------------|----------|-----------------------------------|-----------------------------|---------------------------------|
| GF0020340 | 1                              | 1                        | 1                            | 0    | Hypothetical protein (2)                                                  |          | scaffold_2_mRNA_2297.1            | C.unshii_00074_mRNA_43.1    | -                               |
| GF0020339 | 1                              | 1                        | 1                            | 0    | Hypothetical protein (2)                                                  |          | scaffold_2_mRNA_2296.1            | C.unshii_01585_mRNA_1.1     | -                               |
| GF0020338 | 1                              | 1                        | 1                            | 0    | Hypothetical protein (2)                                                  |          | scaffold_2_mRNA_2295.1            | C.unshii_01585_mRNA_2.1     | -                               |
| GF0020337 | 1                              | 1                        | 1                            | 0    | Hypothetical protein (2)                                                  |          | scaffold_2_mRNA_2290.1            | C.unshii_01585_mRNA_5.1     | -                               |
| GF0020336 | 1                              | 1                        | 1                            | 0    | Hypothetical protein (2)                                                  |          | scaffold_2_mRNA_228.1             | C.unshii_02990_mRNA_2.1     | -                               |
| GF0020355 | 1                              | 1                        | 1                            | 0    | Retransposon protein, putative, Ty1-copia subclass (2)                    |          |                                   |                             |                                 |
| GF0020354 | 1                              | 1                        | 1                            | 0    | Hypothetical protein (2)                                                  |          |                                   |                             |                                 |
| GF0020353 | 1                              | 1                        | 1                            | 0    | Hypothetical protein (2)                                                  |          |                                   |                             |                                 |
| GF0020351 | 1                              | 1                        | 1                            | 0    | Hypothetical protein (2)                                                  |          |                                   |                             |                                 |
| GF0020350 | 1                              | 1                        | 1                            | 0    | Hypothetical protein (2)                                                  |          |                                   |                             |                                 |
| GF0020349 | 1                              | 1                        | 1                            | 0    | Cytokinin riboside 5'-monophosphate phosphoribidylase (2)                 |          |                                   |                             |                                 |
| GF0020348 | 1                              | 1                        | 1                            | 0    | Hypothetical protein (2)                                                  |          |                                   |                             |                                 |
| GF0020347 | 1                              | 1                        | 1                            | 0    | Hypothetical protein (2)                                                  |          |                                   |                             |                                 |
| GF0020346 | 1                              | 1                        | 1                            | 0    | Hypothetical protein (2)                                                  |          |                                   |                             |                                 |
| GF0020345 | 1                              | 1                        | 1                            | 0    | Hypothetical protein (2)                                                  |          |                                   |                             |                                 |
| GF0020344 | 1                              | 1                        | 1                            | 0    | Hypothetical protein (2)                                                  |          |                                   |                             |                                 |
| GF0020343 | 1                              | 1                        | 1                            | 0    | Hypothetical protein (2)                                                  |          |                                   |                             |                                 |
| GF0020342 | 1                              | 1                        | 1                            | 0    | Hypothetical protein (2)                                                  |          |                                   |                             |                                 |
| GF0020341 | 1                              | 1                        | 1                            | 0    | Hypothetical protein (2)                                                  |          |                                   |                             |                                 |
| GF0020337 | 1                              | 1                        | 1                            | 0    | Hypothetical protein (2)                                                  |          |                                   |                             |                                 |
| GF0020336 | 1                              | 1                        | 1                            | 0    | Hypothetical protein (2)                                                  |          |                                   |                             |                                 |
| GF0020335 | 1                              | 1                        | 1                            | 0    | O-methyltransferase (1); Hypothetical protein (1)                         |          |                                   |                             |                                 |
| GF0020334 | 1                              | 1                        | 1                            | 0    | Hypothetical protein (2)                                                  |          |                                   |                             |                                 |
| GF0020333 | 1                              | 1                        | 1                            | 0    | Hypothetical protein (2)                                                  |          |                                   |                             |                                 |
| GF0020331 | 1                              | 1                        | 1                            | 0    | Hypothetical protein (2)                                                  |          |                                   |                             |                                 |
| GF0020330 | 1                              | 1                        | 1                            | 0    | BED zinc finger, HAT family dimerization domain isoform 1 (2)             |          |                                   |                             |                                 |
| GF0020329 | 1                              | 1                        | 1                            | 0    | Hypothetical protein (2)                                                  |          |                                   |                             |                                 |
| GF0020328 | 1                              | 1                        | 1                            | 0    | Cytokinin riboside 5'-monophosphate phosphoribidylase (2)                 |          |                                   |                             |                                 |
| GF0020326 | 1                              | 1                        | 1                            | 0    | Contains similarity to reverse transcriptase related (2)                  |          |                                   |                             |                                 |
| GF0020325 | 1                              | 1                        | 1                            | 0    | cDNA clone:002-110-H12, full insert sequence (2)                          |          |                                   |                             |                                 |
| GF0020324 | 1                              | 1                        | 1                            | 0    | Hypothetical protein (2)                                                  |          |                                   |                             |                                 |
| GF0020323 | 1                              | 1                        | 1                            | 0    | Hypothetical protein (2)                                                  |          |                                   |                             |                                 |
| GF0020322 | 1                              | 1                        | 1                            | 0    | Hypothetical protein (2)                                                  |          |                                   |                             |                                 |
| GF0020320 | 1                              | 1                        | 1                            | 0    | Hypothetical protein (2)                                                  |          |                                   |                             |                                 |
| GF0020319 | 1                              | 1                        | 1                            | 0    | LRR receptor-like kinase family protein (1); Hypothetical protein (1)     |          |                                   |                             |                                 |
| GF0020318 | 1                              | 1                        | 1                            | 0    | Hypothetical protein (2)                                                  |          |                                   |                             |                                 |
| GF0020317 | 1                              | 1                        | 1                            | 0    | Hypothetical protein (2)                                                  |          |                                   |                             |                                 |
| GF0020316 | 1                              | 1                        | 1                            | 0    | Hypothetical protein (2)                                                  |          |                                   |                             |                                 |
| GF0020315 | 1                              | 1                        | 1                            | 0    | Hypothetical protein (2)                                                  |          |                                   |                             |                                 |
| GF0020314 | 1                              | 1                        | 1                            | 0    | Hypothetical protein (2)                                                  |          |                                   |                             |                                 |
| GF0020312 | 1                              | 1                        | 1                            | 0    | Hypothetical protein (2)                                                  |          |                                   |                             |                                 |
| GF0020311 | 1                              | 1                        | 1                            | 0    | Putative non-UTR reverse transcriptase (1); Putative polypeptide (1)      |          |                                   |                             |                                 |
| GF0020310 | 1                              | 1                        | 1                            | 0    | Hypothetical protein (2)                                                  |          |                                   |                             |                                 |
| GF0020309 | 1                              | 1                        | 1                            | 0    | Hypothetical protein (2)                                                  |          |                                   |                             |                                 |
| GF0020308 | 1                              | 1                        | 1                            | 0    | Hypothetical protein (2)                                                  |          |                                   |                             |                                 |
| GF0020307 | 1                              | 1                        | 1                            | 0    | Hypothetical protein (2)                                                  |          |                                   |                             |                                 |
| GF0020306 | 1                              | 1                        | 1                            | 0    | Hypothetical protein (2)                                                  |          |                                   |                             |                                 |
| GF0020305 | 1                              | 1                        | 1                            | 0    | Hypothetical protein (2)                                                  |          |                                   |                             |                                 |
| GF0020302 | 1                              | 1                        | 1                            | 0    | Hypothetical protein (2)                                                  |          |                                   |                             |                                 |
| GF0020301 | 1                              | 1                        | 1                            | 0    | Hypothetical protein (2)                                                  |          |                                   |                             |                                 |
| GF0020300 | 1                              | 1                        | 1                            | 0    | Hypothetical protein (2)                                                  |          |                                   |                             |                                 |
| GF0020299 | 1                              | 1                        | 1                            | 0    | Hypothetical protein (2)                                                  |          |                                   |                             |                                 |
| GF0020298 | 1                              | 1                        | 1                            | 0    | Hypothetical protein (2)                                                  |          |                                   |                             |                                 |
| GF0020297 | 1                              | 1                        | 1                            | 0    | Hypothetical protein (2)                                                  |          |                                   |                             |                                 |
| GF0020296 | 1                              | 1                        | 1                            | 0    | Hypothetical protein (2)                                                  |          |                                   |                             |                                 |
| GF0020295 | 1                              | 1                        | 1                            | 0    | Transmembrane E3 ubiquitin-protein ligase 1 (1); Hypothetical protein (1) |          |                                   |                             |                                 |
| GF0020292 | 1                              | 1                        | 1                            | 0    | Hypothetical protein (2)                                                  |          |                                   |                             |                                 |
| GF0020291 | 1                              | 1                        | 1                            | 0    | Hypothetical protein (2)                                                  |          |                                   |                             |                                 |
| GF0020290 | 1                              | 1                        | 1                            | 0    | Hypothetical protein (2)                                                  |          |                                   |                             |                                 |
| GF0020289 | 1                              | 1                        | 1                            | 0    | Hypothetical protein (2)                                                  |          |                                   |                             |                                 |
| GF0020288 | 1                              | 1                        | 1                            | 0    | Hypothetical protein (2)                                                  |          |                                   |                             |                                 |
| GF0020287 | 1                              | 1                        | 1                            | 0    | Hypothetical protein (2)                                                  |          |                                   |                             |                                 |
| GF0020286 | 1                              | 1                        | 1                            | 0    | Hypothetical protein (2)                                                  |          |                                   |                             |                                 |
| GF0020285 | 1                              | 1                        | 1                            | 0    | Retransposon protein, putative, Ty1-copia subclass (2)                    |          |                                   |                             |                                 |
| GF0020284 | 1                              | 1                        | 1                            | 0    | Nicotianamine aminotransferase A (2)                                      |          |                                   |                             |                                 |
| GF0020283 | 1                              | 1                        | 1                            | 0    | Hypothetical protein (1); Ribonuclease H protein (1)                      |          |                                   |                             |                                 |
| GF0020282 | 1                              | 1                        | 1                            | 0    | Hypothetical protein (2)                                                  |          |                                   |                             |                                 |
| GF0020281 | 1                              | 1                        | 1                            | 0    | Nicotianamine aminotransferase A (1); Tyrosine transaminase (1)           |          |                                   |                             |                                 |



| ID        | Num. in <i>C. caryotactis</i> | Num. in <i>C. uzbekii</i> | Num. in <i>P. trifoliate</i> | Note                                                                                            | GO                                                                                                                                                                                                                                                                                                                                                                                                                                                                                                                                                                                                                                                                                                                                                                                   | InterPro                                                                                                                                                                                                                                                                                                                                                                                                                                                                                 | Members in <i>C. caryotactis</i> | Members in <i>C. uzbekii</i> | Members in <i>P. trifoliate</i> |
|-----------|-------------------------------|---------------------------|------------------------------|-------------------------------------------------------------------------------------------------|--------------------------------------------------------------------------------------------------------------------------------------------------------------------------------------------------------------------------------------------------------------------------------------------------------------------------------------------------------------------------------------------------------------------------------------------------------------------------------------------------------------------------------------------------------------------------------------------------------------------------------------------------------------------------------------------------------------------------------------------------------------------------------------|------------------------------------------------------------------------------------------------------------------------------------------------------------------------------------------------------------------------------------------------------------------------------------------------------------------------------------------------------------------------------------------------------------------------------------------------------------------------------------------|----------------------------------|------------------------------|---------------------------------|
| GF0020196 | 1                             | 1                         | 0                            | Hypothetical protein (2)                                                                        | ATP binding [GO:0005524 molecular_function] (2); nucleotide binding [GO:0000166 molecular_function] (2); RNA binding [GO:0003723 molecular_function] (2); RNA aminoacylation for protein translation [GO:0006418 biological_process] (2); cytoplasm [GO:0005737 cellular_component] (2); tyrosyl-tRNA aminoacylation [GO:0006437 biological_process] (2); aminocyclase activity [GO:0004812 molecular_function] (2); tyrosine-RNA ligase activity [GO:0004831 molecular_function] (2)                                                                                                                                                                                                                                                                                                | Tyrosine-tRNA ligase, bacterial-type, type 1 [IPRO24107] (2); Rossmann-like alpha/beta/sandwich fold [IPRO14729] (2); Tyrosine-tRNA ligase [IPRO02307] (2); Aminocyclase activity, class Ic [IPRO02305] (2); RNA-binding S4 domain [IPRO02942] (2); aminocyclase synthetase, class I, conserved site [IPRO01412] (2); Tyrosine-tRNA ligase, bacterial-type [IPRO24088] (2)                                                                                                               | scaffold_2_mRNA_1498.1           | C_uusniu_00957_mRNA_10.1     | -                               |
| GF0020195 | 1                             | 1                         | 0                            | Hypothetical protein (2)                                                                        |                                                                                                                                                                                                                                                                                                                                                                                                                                                                                                                                                                                                                                                                                                                                                                                      |                                                                                                                                                                                                                                                                                                                                                                                                                                                                                          | scaffold_2_mRNA_1489.1           | C_uusniu_00999_mRNA_2.1      | -                               |
| GF0020193 | 1                             | 1                         | 0                            | Hypothetical protein (2)                                                                        |                                                                                                                                                                                                                                                                                                                                                                                                                                                                                                                                                                                                                                                                                                                                                                                      |                                                                                                                                                                                                                                                                                                                                                                                                                                                                                          | scaffold_2_mRNA_148.1            | C_uusniu_00174_mRNA_32.1     | -                               |
| GF0020192 | 1                             | 1                         | 0                            | Pentatricopeptide repeat-containing protein, mitochondrial (2)                                  | protein binding [GO:0005515 molecular_function] (1)                                                                                                                                                                                                                                                                                                                                                                                                                                                                                                                                                                                                                                                                                                                                  | Pentatricopeptide repeat [IPRO02885] (2); Tetra-tricopeptide-like helical domain [IPRO11990] (1)                                                                                                                                                                                                                                                                                                                                                                                         | scaffold_2_mRNA_1479.1           | C_uusniu_00999_mRNA_10.1     | -                               |
| GF0020191 | 1                             | 1                         | 0                            | Hypothetical protein (2)                                                                        | zinc ion binding [GO:0008270 molecular_function] (2); nucleic acid binding [GO:0003676 molecular_function] (2)                                                                                                                                                                                                                                                                                                                                                                                                                                                                                                                                                                                                                                                                       | Zinc finger, CCHC-type [IPRO01878] (2)                                                                                                                                                                                                                                                                                                                                                                                                                                                   | scaffold_2_mRNA_147.1            | C_uusniu_00174_mRNA_31.1     | -                               |
| GF0020190 | 1                             | 1                         | 0                            | Hypothetical protein (2)                                                                        |                                                                                                                                                                                                                                                                                                                                                                                                                                                                                                                                                                                                                                                                                                                                                                                      |                                                                                                                                                                                                                                                                                                                                                                                                                                                                                          | scaffold_2_mRNA_1460.1           | C_uusniu_00016_mRNA_6.1      | -                               |
| GF0020186 | 1                             | 1                         | 0                            | Phospholipase A1 (2)                                                                            | lipid metabolic process [GO:0006629 biological_process] (2); phosphatidylcholine 1-acylhydrolase activity [GO:0008970 molecular_function] (1)                                                                                                                                                                                                                                                                                                                                                                                                                                                                                                                                                                                                                                        | Fungal lipase-like domain [IPRO02921] (2); Alpha/Beta hydrolase fold [IPRO29058] (2); Phospholipase A1-II [IPRO33556] (1)                                                                                                                                                                                                                                                                                                                                                                | scaffold_2_mRNA_1451.1           | C_uusniu_00184_mRNA_16.1     | -                               |
| GF0020185 | 1                             | 1                         | 0                            | Hypothetical protein (2)                                                                        |                                                                                                                                                                                                                                                                                                                                                                                                                                                                                                                                                                                                                                                                                                                                                                                      | Reverse transcriptase domain [IPRO00477] (2)                                                                                                                                                                                                                                                                                                                                                                                                                                             | scaffold_2_mRNA_145.1            | C_uusniu_00174_mRNA_28.1     | -                               |
| GF0020184 | 1                             | 1                         | 0                            | Hypothetical protein (2)                                                                        | nucleic acid binding [GO:0003676 molecular_function] (1)                                                                                                                                                                                                                                                                                                                                                                                                                                                                                                                                                                                                                                                                                                                             | Ribonuclease H-like domain [IPRO12337] (1)                                                                                                                                                                                                                                                                                                                                                                                                                                               | scaffold_2_mRNA_1448.1           | C_uusniu_00184_mRNA_18.1     | -                               |
| GF0020182 | 1                             | 1                         | 0                            | Hypothetical protein (2)                                                                        |                                                                                                                                                                                                                                                                                                                                                                                                                                                                                                                                                                                                                                                                                                                                                                                      |                                                                                                                                                                                                                                                                                                                                                                                                                                                                                          | scaffold_2_mRNA_144.1            | C_uusniu_00174_mRNA_27.1     | -                               |
| GF0020181 | 1                             | 1                         | 0                            | Cytokinin riboside 5'-monophosphate phosphoribosyltransferase (2)                               | Cytokinin riboside 5'-monophosphate phosphoribosyltransferase LOG [IPRO05269] (2)                                                                                                                                                                                                                                                                                                                                                                                                                                                                                                                                                                                                                                                                                                    | LOG family [IPRO31100] (2); Cytokinin riboside 5'-monophosphate phosphoribosyltransferase LOG [IPRO05269] (2)                                                                                                                                                                                                                                                                                                                                                                            | scaffold_2_mRNA_143.1            | C_uusniu_00174_mRNA_25.1     | -                               |
| GF0020180 | 1                             | 1                         | 0                            | Hypothetical protein (2)                                                                        |                                                                                                                                                                                                                                                                                                                                                                                                                                                                                                                                                                                                                                                                                                                                                                                      |                                                                                                                                                                                                                                                                                                                                                                                                                                                                                          | scaffold_2_mRNA_142.1            | C_uusniu_00174_mRNA_24.1     | -                               |
| GF0020179 | 1                             | 1                         | 0                            | Hypothetical protein (2)                                                                        | drug transmembrane transport [GO:0006855 biological_process] (2); antiporter activity [GO:0015297 molecular_function] (2); drug transmembrane transporter activity [GO:015238 molecular_function] (2); membrane [GO:0016020 cellular_component] (2); transmembrane transport [GO:0055082 biological_process] (2)                                                                                                                                                                                                                                                                                                                                                                                                                                                                     | Multi antimicrobial extrusion protein [IPRO25258] (2)                                                                                                                                                                                                                                                                                                                                                                                                                                    | scaffold_2_mRNA_1413.1           | C_uusniu_00184_mRNA_38.1     | -                               |
| GF0020178 | 1                             | 1                         | 0                            | Hypothetical protein (2)                                                                        |                                                                                                                                                                                                                                                                                                                                                                                                                                                                                                                                                                                                                                                                                                                                                                                      |                                                                                                                                                                                                                                                                                                                                                                                                                                                                                          | scaffold_2_mRNA_1411.1           | C_uusniu_00176_mRNA_19.1     | -                               |
| GF0020177 | 1                             | 1                         | 0                            | Hypothetical protein (2)                                                                        |                                                                                                                                                                                                                                                                                                                                                                                                                                                                                                                                                                                                                                                                                                                                                                                      |                                                                                                                                                                                                                                                                                                                                                                                                                                                                                          | scaffold_2_mRNA_141.1            | C_uusniu_00174_mRNA_14.1     | -                               |
| GF0020176 | 1                             | 1                         | 0                            | Verticillium wilt disease resistance protein (1); Verticillium wilt resistance-like protein (1) | protein binding [GO:0005515 molecular_function] (2)                                                                                                                                                                                                                                                                                                                                                                                                                                                                                                                                                                                                                                                                                                                                  | Leucine-rich repeat [IPRO01611] (2); Leucine-rich repeat-containing N-terminal, plant-type [IPRO13210] (2); Leucine-rich repeat domain, L. domain-like [IPRO32675] (2); Leucine-rich repeat, typical subtype [IPRO03591] (2)                                                                                                                                                                                                                                                             | scaffold_2_mRNA_1408.1           | C_uusniu_00176_mRNA_21.1     | -                               |
| GF0020175 | 1                             | 1                         | 0                            | Hypothetical protein (2)                                                                        |                                                                                                                                                                                                                                                                                                                                                                                                                                                                                                                                                                                                                                                                                                                                                                                      |                                                                                                                                                                                                                                                                                                                                                                                                                                                                                          | scaffold_2_mRNA_1400.1           | C_uusniu_00176_mRNA_28.1     | -                               |
| GF0020174 | 1                             | 1                         | 0                            | Hypothetical protein (2)                                                                        |                                                                                                                                                                                                                                                                                                                                                                                                                                                                                                                                                                                                                                                                                                                                                                                      |                                                                                                                                                                                                                                                                                                                                                                                                                                                                                          | scaffold_2_mRNA_140.1            | C_uusniu_01119_mRNA_10.1     | -                               |
| GF0020173 | 1                             | 1                         | 0                            | Hypothetical protein (2)                                                                        |                                                                                                                                                                                                                                                                                                                                                                                                                                                                                                                                                                                                                                                                                                                                                                                      |                                                                                                                                                                                                                                                                                                                                                                                                                                                                                          | scaffold_2_mRNA_1394.1           | C_uusniu_00176_mRNA_31.1     | -                               |
| GF0020172 | 1                             | 1                         | 0                            | Hypothetical protein (2)                                                                        |                                                                                                                                                                                                                                                                                                                                                                                                                                                                                                                                                                                                                                                                                                                                                                                      |                                                                                                                                                                                                                                                                                                                                                                                                                                                                                          | scaffold_2_mRNA_1392.1           | C_uusniu_00068_mRNA_32.1     | -                               |
| GF0020171 | 1                             | 1                         | 0                            | Phospholipase A1-II 7 (1); Hypothetical protein (1)                                             | phosphatidylcholine 1-acylhydrolase activity [GO:0008970 molecular_function] (1); lipid metabolic process [GO:0006629 biological_process] (1)                                                                                                                                                                                                                                                                                                                                                                                                                                                                                                                                                                                                                                        | Fungal lipase-like domain [IPRO02921] (1); Alpha/Beta hydrolase fold [IPRO29058] (1); Phospholipase A1-II [IPRO33556] (1)                                                                                                                                                                                                                                                                                                                                                                | scaffold_2_mRNA_1387.1           | C_uusniu_00176_mRNA_34.1     | -                               |
| GF0020170 | 1                             | 1                         | 0                            | Hypothetical protein (2)                                                                        |                                                                                                                                                                                                                                                                                                                                                                                                                                                                                                                                                                                                                                                                                                                                                                                      |                                                                                                                                                                                                                                                                                                                                                                                                                                                                                          | scaffold_2_mRNA_1378.1           | C_uusniu_00859_mRNA_2.1      | -                               |
| GF0020169 | 1                             | 1                         | 0                            | Carbohydrate-binding X8 domain protein (2)                                                      |                                                                                                                                                                                                                                                                                                                                                                                                                                                                                                                                                                                                                                                                                                                                                                                      | X8 domain [IPRO12946] (2)                                                                                                                                                                                                                                                                                                                                                                                                                                                                | scaffold_2_mRNA_1371.1           | C_uusniu_00176_mRNA_47.1     | -                               |
| GF0020167 | 1                             | 1                         | 0                            | Hypothetical protein (2)                                                                        |                                                                                                                                                                                                                                                                                                                                                                                                                                                                                                                                                                                                                                                                                                                                                                                      |                                                                                                                                                                                                                                                                                                                                                                                                                                                                                          | scaffold_2_mRNA_1345.1           | C_uusniu_00107_mRNA_9.1      | -                               |
| GF0020166 | 1                             | 1                         | 0                            | Hypothetical protein (2)                                                                        |                                                                                                                                                                                                                                                                                                                                                                                                                                                                                                                                                                                                                                                                                                                                                                                      | Domain of unknown function DUF4283 [IPRO25558] (2)                                                                                                                                                                                                                                                                                                                                                                                                                                       | scaffold_2_mRNA_1333.1           | C_uusniu_00691_mRNA_14.1     | -                               |
| GF0020165 | 1                             | 1                         | 0                            | DnaJ like subfamily B member 13 (2)                                                             | unfolded protein binding [GO:0051082 molecular_function] (2); protein folding [GO:0006457 biological_process] (2)                                                                                                                                                                                                                                                                                                                                                                                                                                                                                                                                                                                                                                                                    | HSP40-like peptidyl-binding [IPRO08971] (2); Chaperone DnaJ, C-terminal [IPRO02939] (2)                                                                                                                                                                                                                                                                                                                                                                                                  | scaffold_2_mRNA_1323.1           | C_uusniu_00402_mRNA_11.1     | -                               |
| GF0020164 | 1                             | 1                         | 0                            | Hypothetical protein (2)                                                                        |                                                                                                                                                                                                                                                                                                                                                                                                                                                                                                                                                                                                                                                                                                                                                                                      | WHM2 domain [IPRO28941] (2); WHM4 domain [IPRO28942] (1); WHM3 domain [IPRO28935] (1)                                                                                                                                                                                                                                                                                                                                                                                                    | scaffold_2_mRNA_1322.1           | C_uusniu_00403_mRNA_10.1     | -                               |
| GF0020163 | 1                             | 1                         | 0                            | Hypothetical protein (2)                                                                        |                                                                                                                                                                                                                                                                                                                                                                                                                                                                                                                                                                                                                                                                                                                                                                                      |                                                                                                                                                                                                                                                                                                                                                                                                                                                                                          | scaffold_2_mRNA_1317.1           | C_uusniu_00403_mRNA_4.1      | -                               |
| GF0020162 | 1                             | 1                         | 0                            | Hypothetical protein (2)                                                                        |                                                                                                                                                                                                                                                                                                                                                                                                                                                                                                                                                                                                                                                                                                                                                                                      |                                                                                                                                                                                                                                                                                                                                                                                                                                                                                          | scaffold_2_mRNA_130.1            | C_uusniu_00799_mRNA_12.1     | -                               |
| GF0020161 | 1                             | 1                         | 0                            | Glycerol-3-phosphate dehydrogenase [NAD+] GPDHC1, cytosolic (2)                                 | oxidoreductase activity, acting on the C-H-OH group of donors, NAD or NADP as acceptor [GO:0016616 molecular_function] (2); NAD binding [GO:0051287 molecular_function] (2); oxidation-reduction process [GO:0051114 biological_process] (2); oxidoreductase activity [GO:0016491 molecular_function] (2); glycerol-3-phosphate dehydrogenase [NAD+] activity [GO:0004367 molecular_function] (2); glycerol-3-phosphate catabolic process [GO:0046168 biological_process] (2); glycerol-3-phosphate dehydrogenase complex [GO:0090333 cellular_component] (2); protein homodimerization activity [GO:0042803 molecular_function] (2); glycerol-3-phosphate metabolic process [GO:0006072 biological_process] (2); carbohydrate metabolic process [GO:0005975 biological_process] (2) | Glycerol-3-phosphate dehydrogenase, NAD-dependent, N-terminal [IPRO1128] (2); Glycerol-3-phosphate dehydrogenase, NAD-dependent, C-terminal [IPRO06109] (2); NAD(P)-binding domain [IPRO16040] (2); Glycerol-3-phosphate dehydrogenase, NAD-dependent [IPRO06168] (2); 6-phosphogluconate dehydrogenase C-terminal domain-like [IPRO0927] (2); 6-phosphogluconate dehydrogenase, domain 2 [IPRO13328] (2); Glycerol-3-phosphate dehydrogenase, NAD-dependent, eukaryotic [IPRO17751] (2) | scaffold_2_mRNA_1292.1           | C_uusniu_00055_mRNA_53.1     | -                               |
| GF0020160 | 1                             | 1                         | 0                            | Hypothetical protein (2)                                                                        |                                                                                                                                                                                                                                                                                                                                                                                                                                                                                                                                                                                                                                                                                                                                                                                      | Sieve element occlusion, N-terminal [IPRO27942] (2)                                                                                                                                                                                                                                                                                                                                                                                                                                      | scaffold_2_mRNA_1287.1           | C_uusniu_00055_mRNA_56.1     | -                               |
| GF0020158 | 1                             | 1                         | 0                            | Polynucleotidyl transferase, Ribonuclease H fold (2)                                            | nucleic acid binding [GO:0003676 molecular_function] (2); nucleotide binding [GO:0000166 molecular_function] (1)                                                                                                                                                                                                                                                                                                                                                                                                                                                                                                                                                                                                                                                                     | Ribonuclease H-like domain [IPRO12337] (2); Reverse transcriptase zinc-binding domain [IPRO26960] (2); RNA recognition motif domain [IPRO05094] (2); Nucleotide-binding alpha-beta plat domain [IPRO12677] (1)                                                                                                                                                                                                                                                                           | scaffold_2_mRNA_1282.1           | C_uusniu_01160_mRNA_11.1     | -                               |
| GF0020157 | 1                             | 1                         | 0                            | Hypothetical protein (1); Non-LTR retroelement reverse transcriptase-like (1)                   | nucleic acid binding [GO:0003676 molecular_function] (1)                                                                                                                                                                                                                                                                                                                                                                                                                                                                                                                                                                                                                                                                                                                             | Reverse transcriptase zinc-binding domain [IPRO26960] (1); Ribonuclease H-like domain [IPRO12337] (1)                                                                                                                                                                                                                                                                                                                                                                                    | scaffold_2_mRNA_1279.1           | C_uusniu_01160_mRNA_8.1      | -                               |
| GF0020156 | 1                             | 1                         | 0                            | Hypothetical protein (2)                                                                        |                                                                                                                                                                                                                                                                                                                                                                                                                                                                                                                                                                                                                                                                                                                                                                                      | von Willebrand factor, type A [IPRO02055] (2); Coprin [IPRO10734] (2); Zinc finger, RING-type [IPRO01841] (1); Zinc finger, RINGFYVE/PHD-type [IPRO13083] (1)                                                                                                                                                                                                                                                                                                                            | scaffold_2_mRNA_1269.1           | C_uusniu_00052_mRNA_11.2     | -                               |
| GF0020155 | 1                             | 1                         | 0                            | E3 ubiquitin-protein ligase RGLG2 (2)                                                           | zinc ion binding [GO:0008270 molecular_function] (1); protein binding [GO:0005515 molecular_function] (1)                                                                                                                                                                                                                                                                                                                                                                                                                                                                                                                                                                                                                                                                            |                                                                                                                                                                                                                                                                                                                                                                                                                                                                                          | scaffold_2_mRNA_1243.1           | C_uusniu_00049_mRNA_21.1     | -                               |
| GF0020154 | 1                             | 1                         | 0                            | Hypothetical protein (2)                                                                        |                                                                                                                                                                                                                                                                                                                                                                                                                                                                                                                                                                                                                                                                                                                                                                                      |                                                                                                                                                                                                                                                                                                                                                                                                                                                                                          | scaffold_2_mRNA_1242.1           | C_uusniu_00049_mRNA_22.1     | -                               |
| GF0020153 | 1                             | 1                         | 0                            | Hypothetical protein (2)                                                                        |                                                                                                                                                                                                                                                                                                                                                                                                                                                                                                                                                                                                                                                                                                                                                                                      |                                                                                                                                                                                                                                                                                                                                                                                                                                                                                          | scaffold_2_mRNA_1242.1           | C_uusniu_00049_mRNA_22.1     | -                               |
| GF0020152 | 1                             | 1                         | 0                            | Myb-related protein Myb4 (2)                                                                    | DNA binding [GO:0003677 molecular_function] (2)                                                                                                                                                                                                                                                                                                                                                                                                                                                                                                                                                                                                                                                                                                                                      | SANT/Myb domain [IPRO01005] (2); Myb domain [IPRO17930] (2); Homeodomain-like [IPRO09057] (1); Homeobox domain-like [IPRO09057] (1)                                                                                                                                                                                                                                                                                                                                                      | scaffold_2_mRNA_1232.1           | C_uusniu_00049_mRNA_42.1     | -                               |
| GF0020151 | 1                             | 1                         | 0                            | Hypothetical protein (2)                                                                        |                                                                                                                                                                                                                                                                                                                                                                                                                                                                                                                                                                                                                                                                                                                                                                                      | Protein kinase-like domain [IPRO11009] (2); Nuclear transport factor 2, eukaryote [IPRO18222] (2); Protein kinase domain [IPRO0719] (2); Protein kinase, ATP binding site [IPRO17441] (2); NTF2-like domain [IPRO032710] (2); Serine/threonine-protein kinase, active site [IPRO08271] (2); Serine/threonine/dual specificity protein kinase, catalytic domain [IPRO02290] (1)                                                                                                           | scaffold_2_mRNA_123.1            | C_uusniu_00799_mRNA_7.1      | -                               |
| GF0020150 | 1                             | 1                         | 0                            | Dual specificity mitogen-activated protein kinase kinase 1 (2)                                  | ATP binding [GO:0005524 molecular_function] (2); protein phosphorylation [GO:0006468 biological_process] (2); protein kinase activity [GO:0004672 molecular_function] (2)                                                                                                                                                                                                                                                                                                                                                                                                                                                                                                                                                                                                            |                                                                                                                                                                                                                                                                                                                                                                                                                                                                                          | scaffold_2_mRNA_1224.1           | C_uusniu_00049_mRNA_51.1     | -                               |
| GF0020149 | 1                             | 1                         | 0                            | Hypothetical protein (2)                                                                        |                                                                                                                                                                                                                                                                                                                                                                                                                                                                                                                                                                                                                                                                                                                                                                                      |                                                                                                                                                                                                                                                                                                                                                                                                                                                                                          | scaffold_2_mRNA_122.1            | C_uusniu_00799_mRNA_6.1      | -                               |
| GF0020147 | 1                             | 1                         | 0                            | Hypothetical protein (2)                                                                        |                                                                                                                                                                                                                                                                                                                                                                                                                                                                                                                                                                                                                                                                                                                                                                                      |                                                                                                                                                                                                                                                                                                                                                                                                                                                                                          | scaffold_2_mRNA_1210.1           | C_uusniu_00049_mRNA_66.1     | -                               |
| GF0020146 | 1                             | 1                         | 0                            | Hypothetical protein (2)                                                                        |                                                                                                                                                                                                                                                                                                                                                                                                                                                                                                                                                                                                                                                                                                                                                                                      |                                                                                                                                                                                                                                                                                                                                                                                                                                                                                          | scaffold_2_mRNA_121.1            | C_uusniu_00799_mRNA_5.1      | -                               |
| GF0020145 | 1                             | 1                         | 0                            | Hypothetical protein (2)                                                                        |                                                                                                                                                                                                                                                                                                                                                                                                                                                                                                                                                                                                                                                                                                                                                                                      |                                                                                                                                                                                                                                                                                                                                                                                                                                                                                          | scaffold_2_mRNA_1195.1           | C_uusniu_00049_mRNA_76.1     | -                               |
| GF0020144 | 1                             | 1                         | 0                            | Glutaredoxin (2)                                                                                | cell redox homeostasis [GO:0045454 biological_process] (2); electron carrier activity [GO:0009055 molecular_function] (2); protein disulfide oxidoreductase activity [GO:0015035 molecular_function] (2)                                                                                                                                                                                                                                                                                                                                                                                                                                                                                                                                                                             | Thioredoxin-like fold [IPRO12336] (2); Glutaredoxin, eukaryotic/viral [IPRO11899] (2); Glutaredoxin [IPRO02189] (2); Glutaredoxin active site [IPRO11767] (2); Glutaredoxin subgroup [IPRO14025] (2)                                                                                                                                                                                                                                                                                     | scaffold_2_mRNA_1193.1           | C_uusniu_00049_mRNA_78.1     | -                               |



| ID       | Num. in <i>C. clementinae</i> | Num. in <i>C. acutis</i> | Num. in <i>P. trifoliata</i> | Note                                                                      | GO                                                                                                                                                                                                                                                                                                                                                                                                                                                                                                                                        | InterPro                                                                                                                                                                                                                                                                                                                                                                                       | Members in <i>C. clementinae</i> | Members in <i>C. acutis</i> | Members in <i>P. trifoliata</i> |
|----------|-------------------------------|--------------------------|------------------------------|---------------------------------------------------------------------------|-------------------------------------------------------------------------------------------------------------------------------------------------------------------------------------------------------------------------------------------------------------------------------------------------------------------------------------------------------------------------------------------------------------------------------------------------------------------------------------------------------------------------------------------|------------------------------------------------------------------------------------------------------------------------------------------------------------------------------------------------------------------------------------------------------------------------------------------------------------------------------------------------------------------------------------------------|----------------------------------|-----------------------------|---------------------------------|
| GF002070 | 1                             | 1                        | 0                            | Ras-related protein Rab7 (2)                                              | GTP binding [GO:000525 molecular_function] (2); GTPase activity [GO:0003924 molecular_function] (2); signal transduction [GO:0007165 biological_process] (1); intracellular [GO:0005622 cellular_component] (1); intracellular protein transport [GO:0006886 biological_process] (1); nucleocytoplasmic transport [GO:0006913 biological_process] (1); small GTPase mediated signal transduction [GO:0007264 biological_process] (1); membrane [GO:0016020 cellular_component] (1); protein transport [GO:0015031 biological_process] (1) | P-loop containing nucleoside triphosphate hydrolase [IPR027417] (2); Small GTPase superfamily [IPR018060] (2); Small GTP-binding protein domain [IPR005225] (2); Small GTPase superfamily, Ras type [IPR020849] (1); Small GTPase superfamily, Rab type [IPR035791] (1); Ran GTPase [IPR020411] (1); Small GTPase superfamily, Rho type [IPR003578] (1)                                        | scaffold_1_mRNA_813.1            | C_unshiu_00075_mRNA_45.1    | -                               |
| GF002069 | 1                             | 1                        | 0                            | Hypothetical protein (2)                                                  |                                                                                                                                                                                                                                                                                                                                                                                                                                                                                                                                           |                                                                                                                                                                                                                                                                                                                                                                                                | scaffold_1_mRNA_809.1            | C_unshiu_00075_mRNA_29.1    | -                               |
| GF002068 | 1                             | 1                        | 0                            | Hypothetical protein (2)                                                  |                                                                                                                                                                                                                                                                                                                                                                                                                                                                                                                                           |                                                                                                                                                                                                                                                                                                                                                                                                | scaffold_1_mRNA_805.1            | C_unshiu_00075_mRNA_24.1    | -                               |
| GF002067 | 1                             | 1                        | 0                            | Putative xyloglucan glycosyltransferase 5 (2)                             |                                                                                                                                                                                                                                                                                                                                                                                                                                                                                                                                           | Nucleotide-diphospho-sugar transferases [IPR020444] (2)                                                                                                                                                                                                                                                                                                                                        | scaffold_1_mRNA_78.1             | C_unshiu_00129_mRNA_26.1    | -                               |
| GF002066 | 1                             | 1                        | 0                            | Hypothetical protein (2)                                                  |                                                                                                                                                                                                                                                                                                                                                                                                                                                                                                                                           |                                                                                                                                                                                                                                                                                                                                                                                                | scaffold_1_mRNA_775.1            | C_unshiu_00075_mRNA_8.1     | -                               |
| GF002065 | 1                             | 1                        | 0                            | Hypothetical protein (2)                                                  |                                                                                                                                                                                                                                                                                                                                                                                                                                                                                                                                           |                                                                                                                                                                                                                                                                                                                                                                                                | scaffold_1_mRNA_767.1            | C_unshiu_01122_mRNA_13.1    | -                               |
| GF002064 | 1                             | 1                        | 0                            | Hypothetical protein (2)                                                  | magnesium ion binding [GO:0000287 molecular_function] (2); terpene synthase activity [GO:0010333 molecular_function] (2); base activity [GO:0016829 molecular_function] (2)                                                                                                                                                                                                                                                                                                                                                               | Terpene synthase, metal-binding domain [IPR005630] (2); Isoprenoid synthase domain [IPR008949] (2)                                                                                                                                                                                                                                                                                             | scaffold_1_mRNA_766.1            | C_unshiu_01122_mRNA_8.1     | -                               |
| GF002062 | 1                             | 1                        | 0                            | Hypothetical protein (2)                                                  |                                                                                                                                                                                                                                                                                                                                                                                                                                                                                                                                           |                                                                                                                                                                                                                                                                                                                                                                                                | scaffold_1_mRNA_764.1            | C_unshiu_01122_mRNA_10.1    | -                               |
| GF002060 | 1                             | 1                        | 0                            | General transcription factor IIIH subunit 4 (2)                           | ATP-dependent DNA helicase activity [GO:0004003 molecular_function] (2); nucleus [GO:0005634 cellular_component] (2); core TFIIH complex [GO:0000949 cellular_component] (2); nucleotide-excision repair [GO:0006289 biological_process] (2)                                                                                                                                                                                                                                                                                              | Transcription factor TFIIH subunit p52/Tb2 [IPR004598] (2)                                                                                                                                                                                                                                                                                                                                     | scaffold_1_mRNA_756.1            | C_unshiu_01122_mRNA_5.1     | -                               |
| GF002059 | 1                             | 1                        | 0                            | Hypothetical protein (2)                                                  |                                                                                                                                                                                                                                                                                                                                                                                                                                                                                                                                           |                                                                                                                                                                                                                                                                                                                                                                                                | scaffold_1_mRNA_753.1            | C_unshiu_00947_mRNA_6.1     | -                               |
| GF002058 | 1                             | 1                        | 0                            | Hypothetical protein (2)                                                  |                                                                                                                                                                                                                                                                                                                                                                                                                                                                                                                                           |                                                                                                                                                                                                                                                                                                                                                                                                | scaffold_1_mRNA_748.1            | C_unshiu_00947_mRNA_1.1     | -                               |
| GF002055 | 1                             | 1                        | 0                            | CBS domain-containing protein CBSX5 (2)                                   |                                                                                                                                                                                                                                                                                                                                                                                                                                                                                                                                           |                                                                                                                                                                                                                                                                                                                                                                                                | scaffold_1_mRNA_743.1            | C_unshiu_01381_mRNA_3.1     | -                               |
| GF002054 | 1                             | 1                        | 0                            | Hypothetical protein (1); Protein FAR1-RELATED SEQUENCE 5 (1)             | nucleic acid binding [GO:0003676 molecular_function] (2); zinc ion binding [GO:0008270 molecular_function] (2); regulation of transcription, DNA-templated [GO:0006355 biological_process] (2); oxidation-reduction process [GO:005114 biological_process] (1); oxidoreductase activity, acting on paired donors, with incorporation or reduction of molecular oxygen [GO:0016705 molecular_function] (1); heme binding [GO:0020037 molecular_function] (1); iron ion binding [GO:0005506 molecular_function] (1)                         | MULE transposase domain [IPR018289] (2); Zinc finger, PMZ-type [IPR006564] (2); Zinc finger, SWIM-type [IPR007527] (2); FYF1/FAR1 family [IPR031072] (2); Zinc finger, CCHC-type [IPR001878] (2); Cytochrome P450 [IPR01128] (1); FAR1 DNA binding domain [IPR004330] (1)                                                                                                                      | scaffold_1_mRNA_742.1            | C_unshiu_00178_mRNA_37.1    | -                               |
| GF002053 | 1                             | 1                        | 0                            | Hypothetical protein (2)                                                  |                                                                                                                                                                                                                                                                                                                                                                                                                                                                                                                                           |                                                                                                                                                                                                                                                                                                                                                                                                | scaffold_1_mRNA_741.1            | C_unshiu_02595_mRNA_1.1     | -                               |
| GF002052 | 1                             | 1                        | 0                            | Hypothetical protein (2)                                                  | nucleic acid binding [GO:0003676 molecular_function] (2); zinc ion binding [GO:0008270 molecular_function] (2)                                                                                                                                                                                                                                                                                                                                                                                                                            | Zinc finger, CCHC-type [IPR001878] (2)                                                                                                                                                                                                                                                                                                                                                         | scaffold_1_mRNA_740.1            | C_unshiu_01381_mRNA_4.1     | -                               |
| GF002051 | 1                             | 1                        | 0                            | Hypothetical protein (2)                                                  | nucleic acid binding [GO:0003676 molecular_function] (2)                                                                                                                                                                                                                                                                                                                                                                                                                                                                                  | Ribonuclease H-like domain [IPR012377] (2)                                                                                                                                                                                                                                                                                                                                                     | scaffold_1_mRNA_734.1            | C_unshiu_00148_mRNA_40.1    | -                               |
| GF002049 | 1                             | 1                        | 0                            | Hypothetical protein (2)                                                  | DNA binding [GO:0000677 molecular_function] (2); sequence-specific DNA binding [GO:0043565 molecular_function] (2)                                                                                                                                                                                                                                                                                                                                                                                                                        | Lambda repressor-like, DNA-binding domain [IPR010982] (2); Cys-C1-type helix-turn-helix domain [IPR001387] (2)                                                                                                                                                                                                                                                                                 | scaffold_1_mRNA_718.1            | C_unshiu_00148_mRNA_27.1    | -                               |
| GF002048 | 1                             | 1                        | 0                            | Hypothetical protein (1); DNA mismatch repair protein Msh6-2 (1)          | mismatch repair [GO:0006298 biological_process] (2); mismatched DNA binding [GO:00030983 molecular_function] (2); ATP binding [GO:0005524 molecular_function] (2)                                                                                                                                                                                                                                                                                                                                                                         | DNA mismatch repair protein MutS, N-terminal [IPR016151] (2); DNA mismatch repair protein MutS-like, N-terminal [IPR007695] (2); P-loop containing nucleoside triphosphate hydrolase [IPR027417] (1); DNA mismatch repair protein MutS, connector domain [IPR007860] (1); DNA mismatch repair protein MutS, core [IPR007696] (1); DNA mismatch repair protein MutS, C-terminal [IPR000432] (1) | scaffold_1_mRNA_716.1            | C_unshiu_00148_mRNA_25.1    | -                               |
| GF002044 | 1                             | 1                        | 0                            | Putative sulfate transporter 3.4 (2)                                      | membrane [GO:0016020 cellular_component] (2); secondary active sulfate transmembrane transporter activity [GO:0008271 molecular_function] (2); sulfate transport [GO:0008272 biological_process] (2); integral component of membrane [GO:0016021 cellular_component] (2); transmembrane transport [GO:0055085 biological_process] (2); sulfate transmembrane transporter activity [GO:0015116 molecular_function] (2); sulfate transmembrane transport [GO:1902358 biological_process] (2)                                                | Sulfate transporter 3.4 [IPR030317] (2); SLC26A/SulP transporter [IPR001902] (2); STAS domain [IPR026451] (2); SLC26A/SulP transporter domain [IPR011547] (2); Sulphate anion transporter, conserved site [IPR018045] (2)                                                                                                                                                                      | scaffold_1_mRNA_711.1            | C_unshiu_00242_mRNA_6.1     | -                               |
| GF002043 | 1                             | 1                        | 0                            | Hypothetical protein (2)                                                  |                                                                                                                                                                                                                                                                                                                                                                                                                                                                                                                                           |                                                                                                                                                                                                                                                                                                                                                                                                | scaffold_1_mRNA_710.1            | C_unshiu_00242_mRNA_4.1     | -                               |
| GF002042 | 1                             | 1                        | 0                            | Hypothetical protein (2)                                                  |                                                                                                                                                                                                                                                                                                                                                                                                                                                                                                                                           |                                                                                                                                                                                                                                                                                                                                                                                                | scaffold_1_mRNA_684.1            | C_unshiu_00016_mRNA_61.1    | -                               |
| GF002041 | 1                             | 1                        | 0                            | Hypothetical protein (2)                                                  |                                                                                                                                                                                                                                                                                                                                                                                                                                                                                                                                           |                                                                                                                                                                                                                                                                                                                                                                                                | scaffold_1_mRNA_683.1            | C_unshiu_00016_mRNA_62.1    | -                               |
| GF002040 | 1                             | 1                        | 0                            | Protease inhibitor/seed storage/lipid transfer protein family protein (2) |                                                                                                                                                                                                                                                                                                                                                                                                                                                                                                                                           | Bifunctional inhibitor/plant lipid transfer protein/seed storage helical domain [IPR016140] (2)                                                                                                                                                                                                                                                                                                | scaffold_1_mRNA_680.1            | C_unshiu_00016_mRNA_64.1    | -                               |
| GF002038 | 1                             | 1                        | 0                            | Hypothetical protein (1)                                                  | DUF2921 family protein (1);                                                                                                                                                                                                                                                                                                                                                                                                                                                                                                               | Protein of unknown function DUF2921 [IPR021319] (2)                                                                                                                                                                                                                                                                                                                                            | scaffold_1_mRNA_665.1            | C_unshiu_00016_mRNA_81.1    | -                               |
| GF002037 | 1                             | 1                        | 0                            | Hypothetical protein (2)                                                  | nucleic acid binding [GO:0003676 molecular_function] (2); nucleotide binding [GO:0000166 molecular_function] (1)                                                                                                                                                                                                                                                                                                                                                                                                                          | RNA recognition motif domain [IPR000504] (2); Nucleotide-binding alpha-beta plat domain [IPR012677] (1)                                                                                                                                                                                                                                                                                        | scaffold_1_mRNA_663.1            | C_unshiu_00016_mRNA_83.1    | -                               |
| GF002035 | 1                             | 1                        | 0                            | Hypothetical protein (2)                                                  |                                                                                                                                                                                                                                                                                                                                                                                                                                                                                                                                           |                                                                                                                                                                                                                                                                                                                                                                                                | scaffold_1_mRNA_632.1            | C_unshiu_00039_mRNA_14.1    | -                               |
| GF002033 | 1                             | 1                        | 0                            | Zinc finger (Ran-binding) family protein (2)                              | zinc ion binding [GO:0008270 molecular_function] (2)                                                                                                                                                                                                                                                                                                                                                                                                                                                                                      | Zinc finger, RanBP2-type [IPR001876] (2)                                                                                                                                                                                                                                                                                                                                                       | scaffold_1_mRNA_626.1            | C_unshiu_00547_mRNA_6.1     | -                               |
| GF002032 | 1                             | 1                        | 0                            | NADH-cytochrome b5 reductase (2)                                          | oxidoreductase activity [GO:0016491 molecular_function] (2); oxidation-reduction process [GO:005114 biological_process] (2)                                                                                                                                                                                                                                                                                                                                                                                                               | Flavoprotein pyridine nucleotide cytochrome reductase [IPR001709] (2); Riboflavin synthase-like beta-barrel [IPR017938] (2); NADH-cytochrome b5 reductase (CBR) [IPR001834] (2); Oxidoreductase FAD/NAD(P)-binding [IPR01433] (2); Ferredoxin reductase-type FAD-binding domain [IPR017927] (2); Oxidoreductase, FAD-binding domain [IPR008333] (2)                                            | scaffold_1_mRNA_622.1            | C_unshiu_00547_mRNA_9.1     | -                               |
| GF002031 | 1                             | 1                        | 0                            | Hypothetical protein (2)                                                  |                                                                                                                                                                                                                                                                                                                                                                                                                                                                                                                                           |                                                                                                                                                                                                                                                                                                                                                                                                | scaffold_1_mRNA_6.1              | C_unshiu_00144_mRNA_39.1    | -                               |
| GF002030 | 1                             | 1                        | 0                            | Hypothetical protein (2)                                                  |                                                                                                                                                                                                                                                                                                                                                                                                                                                                                                                                           |                                                                                                                                                                                                                                                                                                                                                                                                | scaffold_1_mRNA_599.1            | C_unshiu_00203_mRNA_39.1    | -                               |
| GF002029 | 1                             | 1                        | 0                            | Putative chaperon P13.9 (2)                                               | unfolded protein binding [GO:0051082 molecular_function] (2); heat shock protein binding [GO:0031072 molecular_function] (2)                                                                                                                                                                                                                                                                                                                                                                                                              | Heat shock protein DnaJ, cysteine-rich domain [IPR01305] (2)                                                                                                                                                                                                                                                                                                                                   | scaffold_1_mRNA_593.1            | C_unshiu_00203_mRNA_31.1    | -                               |
| GF002028 | 1                             | 1                        | 0                            | Hypothetical protein (2)                                                  | structural constituent of ribosome [GO:0003735 molecular_function] (2); translation [GO:0006412 biological_process] (2); intracellular [GO:0005622 cellular_component] (2); ribosome [GO:0005840 cellular_component] (2)                                                                                                                                                                                                                                                                                                                  | Ribosomal protein L36 [IPR000473] (2)                                                                                                                                                                                                                                                                                                                                                          | scaffold_1_mRNA_583.1            | C_unshiu_00203_mRNA_21.1    | -                               |
| GF002027 | 1                             | 1                        | 0                            | Hypothetical protein (2)                                                  |                                                                                                                                                                                                                                                                                                                                                                                                                                                                                                                                           | Protein of unknown function DUF247, plant [IPR004158] (2)                                                                                                                                                                                                                                                                                                                                      | scaffold_1_mRNA_580.1            | C_unshiu_00203_mRNA_18.1    | -                               |
| GF002026 | 1                             | 1                        | 0                            | RNA 2'-phosphotransferase isoform 1 (2)                                   | tRNA splicing, via endonucleolytic cleavage and ligation [GO:0006388 biological_process] (2); transfranse activity, transferring phosphorus-containing groups [GO:0016772 molecular_function] (2)                                                                                                                                                                                                                                                                                                                                         | Phosphotransferase KptA/Tpt1 [IPR002745] (2)                                                                                                                                                                                                                                                                                                                                                   | scaffold_1_mRNA_573.1            | C_unshiu_00203_mRNA_9.1     | -                               |
| GF002023 | 1                             | 1                        | 0                            | Hypothetical protein (2)                                                  |                                                                                                                                                                                                                                                                                                                                                                                                                                                                                                                                           |                                                                                                                                                                                                                                                                                                                                                                                                | scaffold_1_mRNA_537.1            | C_unshiu_00572_mRNA_2.1     | -                               |
| GF002022 | 1                             | 1                        | 0                            | Hypothetical protein (2)                                                  |                                                                                                                                                                                                                                                                                                                                                                                                                                                                                                                                           |                                                                                                                                                                                                                                                                                                                                                                                                | scaffold_1_mRNA_536.1            | C_unshiu_00572_mRNA_3.1     | -                               |
| GF002021 | 1                             | 1                        | 0                            | Hypothetical protein (2)                                                  | protein phosphorylation [GO:0006468 biological_process] (2); protein kinase activity [GO:0004672 molecular_function] (2)                                                                                                                                                                                                                                                                                                                                                                                                                  | Protein kinase-like domain [IPR011009] (2); Serine-threonine/tyrosine-protein kinase, catalytic domain [IPR001245] (1); Serine-threonine/tyrosine-protein kinase catalytic domain [IPR001245] (1)                                                                                                                                                                                              | scaffold_1_mRNA_535.1            | C_unshiu_00572_mRNA_4.1     | -                               |
| GF002020 | 1                             | 1                        | 0                            | Hypothetical protein (2)                                                  |                                                                                                                                                                                                                                                                                                                                                                                                                                                                                                                                           | Leucine-rich repeat domain, L domain-like [IPR032675] (2)                                                                                                                                                                                                                                                                                                                                      | scaffold_1_mRNA_533.1            | C_unshiu_00572_mRNA_6.1     | -                               |
| GF002019 | 1                             | 1                        | 0                            | Hypothetical protein (2)                                                  |                                                                                                                                                                                                                                                                                                                                                                                                                                                                                                                                           |                                                                                                                                                                                                                                                                                                                                                                                                | scaffold_1_mRNA_532.1            | C_unshiu_00572_mRNA_8.1     | -                               |
| GF002018 | 1                             | 1                        | 0                            | Lectin (2)                                                                | carbohydrate binding [GO:0030246 molecular_function] (2)                                                                                                                                                                                                                                                                                                                                                                                                                                                                                  | Concanavalin A-like lectin/galactanase domain [IPR013320] (2); Legume lectin domain [IPR01122] (2); Legume lectin [IPR016363] (1); Lectin [IPR016363] (1)                                                                                                                                                                                                                                      | scaffold_1_mRNA_521.1            | C_unshiu_00572_mRNA_19.1    | -                               |



| ID        | Num. in <i>C. clementinae</i> | Num. in <i>C. acutula</i> | Num. in <i>P. trifoliata</i> | Note                                                                                                                                                                       | GO                                                                                                                                                                                                                                                                                                                                                                   | InterPro                                                                                                                                                                                                                                                                                                                                                                                                                                                               | Members in <i>C. clementinae</i> | Members in <i>C. acutula</i> | Members in <i>P. trifoliata</i> |
|-----------|-------------------------------|---------------------------|------------------------------|----------------------------------------------------------------------------------------------------------------------------------------------------------------------------|----------------------------------------------------------------------------------------------------------------------------------------------------------------------------------------------------------------------------------------------------------------------------------------------------------------------------------------------------------------------|------------------------------------------------------------------------------------------------------------------------------------------------------------------------------------------------------------------------------------------------------------------------------------------------------------------------------------------------------------------------------------------------------------------------------------------------------------------------|----------------------------------|------------------------------|---------------------------------|
| GF0020017 | 1                             | 1                         | 0                            | Putative ycd6 (1); Hypothetical protein (1)                                                                                                                                |                                                                                                                                                                                                                                                                                                                                                                      | Uncharacterised protein family Ycd6 [IPRO09631] (2); Protein of unknown function DUF778 [IPRO08496] (1)                                                                                                                                                                                                                                                                                                                                                                | scaffold_1_mRNA_505.1            | C_unshiu_00055_mRNA_4.1      | -                               |
| GF0020016 | 1                             | 1                         | 0                            | Calcineurin B-like protein (2)                                                                                                                                             | calcium ion binding [GO:0005509 molecular_function] (2)                                                                                                                                                                                                                                                                                                              | EF-hand domain pair [IPRO11992] (2); EF-Hand 1, calcium-binding site [IPRO18247] (2); EF-hand domain [IPRO20248] (2)                                                                                                                                                                                                                                                                                                                                                   | scaffold_1_mRNA_502.1            | C_unshiu_00055_mRNA_6.1      | -                               |
| GF0020012 | 1                             | 1                         | 0                            | NADH dehydrogenase [ubiquinone] iron-sulfur protein 7, mitochondrial (2)                                                                                                   | oxidation-reduction process [GO:005114 biological_process] (2); non-sulfur cluster binding [GO:0051536 molecular_function] (2)                                                                                                                                                                                                                                       | NADH:ubiquinone oxidoreductase-like, 20kDa subunit [IPRO06137] (2)                                                                                                                                                                                                                                                                                                                                                                                                     | scaffold_1_mRNA_493.1            | C_unshiu_00055_mRNA_17.1     | -                               |
| GF0020011 | 1                             | 1                         | 0                            | Hypothetical protein (2)                                                                                                                                                   |                                                                                                                                                                                                                                                                                                                                                                      |                                                                                                                                                                                                                                                                                                                                                                                                                                                                        | scaffold_1_mRNA_491.1            | C_unshiu_00055_mRNA_19.1     | -                               |
| GF0020010 | 1                             | 1                         | 0                            | DUF1764 domain protein (2)                                                                                                                                                 |                                                                                                                                                                                                                                                                                                                                                                      | Protein of unknown function DUF1764, eukaryotic [IPRO13885] (2)                                                                                                                                                                                                                                                                                                                                                                                                        | scaffold_1_mRNA_487.1            | C_unshiu_00055_mRNA_24.1     | -                               |
| GF0020006 | 1                             | 1                         | 0                            | Hypothetical protein (2)                                                                                                                                                   |                                                                                                                                                                                                                                                                                                                                                                      |                                                                                                                                                                                                                                                                                                                                                                                                                                                                        | scaffold_1_mRNA_459.1            | C_unshiu_00006_mRNA_25.1     | -                               |
| GF0020005 | 1                             | 1                         | 0                            | Poly(A) polymerase 1 isoform 1 (2)                                                                                                                                         | nucleus [GO:0005634 cellular_component] (2); RNA binding [GO:0003723 molecular_function] (2); nucleotidyltransferase activity [GO:0016779 molecular_function] (2); RNA 3'-end processing [GO:0011123 biological_process] (2); RNA polyadenylation [GO:0043631 biological_process] (2); polynucleotide adenyltransferase activity [GO:0004652 molecular_function] (2) | Poly(A) polymerase [IPRO14492] (2); Nucleotidyltransferase, class I, C-terminal-like [IPRO11068] (2); Poly(A) polymerase, RNA-binding domain [IPRO07010] (2); Polymerase, nucleotidyl transferase domain [IPRO02954] (2); Poly(A) polymerase, central domain [IPRO07012] (2)                                                                                                                                                                                           | scaffold_1_mRNA_456.1            | C_unshiu_00006_mRNA_28.1     | -                               |
| GF0020004 | 1                             | 1                         | 0                            | Hypothetical protein (2)                                                                                                                                                   |                                                                                                                                                                                                                                                                                                                                                                      |                                                                                                                                                                                                                                                                                                                                                                                                                                                                        | scaffold_1_mRNA_455.1            | C_unshiu_00006_mRNA_29.1     | -                               |
| GF0020003 | 1                             | 1                         | 0                            | Hypothetical protein (2)                                                                                                                                                   | rRNA processing [GO:0006364 biological_process] (2); metalloendopeptidase activity [GO:0004222 molecular_function] (2)                                                                                                                                                                                                                                               | Endoribonuclease VbcY [IPRO02036] (2); Metalloprotease catalytic domain, predicted [IPRO23091] (2)                                                                                                                                                                                                                                                                                                                                                                     | scaffold_1_mRNA_454.1            | C_unshiu_00006_mRNA_32.1     | -                               |
| GF0020002 | 1                             | 1                         | 0                            | Receptor-like protein kinase HSL1 (2)                                                                                                                                      | protein phosphorylation [GO:0006468 biological_process] (2); protein kinase activity [GO:0004672 molecular_function] (2); ATP binding [GO:0005524 molecular_function] (2)                                                                                                                                                                                            | Protein kinase domain [IPRO00719] (2); Leucine-rich repeat, typical subtype [IPRO03591] (2); Leucine-rich repeat domain, L domain-like [IPRO32675] (2); Protein kinase-like domain [IPRO11009] (2); Leucine-rich repeat-containing N-terminal-type [IPRO13210] (2); Protein kinase, ATP binding site [IPRO17441] (2); Serine/threonine-protein kinase, active site [IPRO08271] (2); Serine/threonine dual specificity protein kinase, catalytic domain [IPRO02290] (1) | scaffold_1_mRNA_452.1            | C_unshiu_00006_mRNA_34.1     | -                               |
| GF0020001 | 1                             | 1                         | 0                            | 60S ribosomal protein L36 (2)                                                                                                                                              | ribosome [GO:0005840 cellular_component] (2); structural constituent of ribosome [GO:0003735 molecular_function] (2); intracellular [GO:0005622 cellular_component] (2); translation [GO:0006412 biological_process] (2)                                                                                                                                             | Ribosomal protein L36e [IPRO00509] (2)                                                                                                                                                                                                                                                                                                                                                                                                                                 | scaffold_1_mRNA_439.1            | C_unshiu_00006_mRNA_51.1     | -                               |
| GF0020000 | 1                             | 1                         | 0                            | Hypothetical protein (2)                                                                                                                                                   |                                                                                                                                                                                                                                                                                                                                                                      |                                                                                                                                                                                                                                                                                                                                                                                                                                                                        | scaffold_1_mRNA_433.1            | C_unshiu_00006_mRNA_57.1     | -                               |
| GF0019999 | 1                             | 1                         | 0                            | Hypothetical protein (2)                                                                                                                                                   | defense response [GO:0006952 biological_process] (1)                                                                                                                                                                                                                                                                                                                 | NONRESPONDING TO OXYLIPINS 2 [IPRO33252] (1)                                                                                                                                                                                                                                                                                                                                                                                                                           | scaffold_1_mRNA_426.1            | C_unshiu_00006_mRNA_63.1     | -                               |
| GF0019998 | 1                             | 1                         | 0                            | Peptidyl-rRNA hydrolase II (PTH2) family protein (2)                                                                                                                       | aminoacyl-rRNA hydrolase activity [GO:0004045 molecular_function] (2)                                                                                                                                                                                                                                                                                                | Peptidyl-rRNA hydrolase II domain [IPRO23476] (2); Peptidyl-rRNA hydrolase, PTH2 [IPRO02833] (2)                                                                                                                                                                                                                                                                                                                                                                       | scaffold_1_mRNA_425.1            | C_unshiu_00006_mRNA_64.1     | -                               |
| GF0019997 | 1                             | 1                         | 0                            | SWIM zinc finger protein/ MAP kinase kinase (Mapkkk), putative (1); SWIM zinc finger family protein / mitogen-activated protein kinase kinase kinase-related, putative (1) | zinc ion binding [GO:0008270 molecular_function] (2); protein binding [GO:0005515 molecular_function] (2)                                                                                                                                                                                                                                                            | Zinc finger, SWIM-type [IPRO07527] (2); Zinc finger, RING-FYVE/PHD-type [IPRO13083] (2); Zinc finger, RING-type [IPRO1841] (2)                                                                                                                                                                                                                                                                                                                                         | scaffold_1_mRNA_424.1            | C_unshiu_00006_mRNA_65.1     | -                               |
| GF0019996 | 1                             | 1                         | 0                            | SCNH hydrolase-type esterase superfamily protein, putative (2)                                                                                                             | hydrolase activity, acting on ester bonds [GO:0016788 molecular_function] (2)                                                                                                                                                                                                                                                                                        | SGNH hydrolase-type esterase domain [IPRO13830] (2); GDSL lipase/esterase [IPRO1087] (2)                                                                                                                                                                                                                                                                                                                                                                               | scaffold_1_mRNA_423.1            | C_unshiu_00006_mRNA_67.1     | -                               |
| GF0019995 | 1                             | 1                         | 0                            | Chromosome condensation regulator RCC1 repeat protein (2)                                                                                                                  |                                                                                                                                                                                                                                                                                                                                                                      | Regulator of chromosome condensation 1/beta-lactamase-inhibitor protein II [IPRO00991] (2); Regulator of chromosome condensation, RCC1 [IPRO0408] (2)                                                                                                                                                                                                                                                                                                                  | scaffold_1_mRNA_422.1            | C_unshiu_00006_mRNA_68.1     | -                               |
| GF0019994 | 1                             | 1                         | 0                            | Nuclear pore complex protein Nup85 (2)                                                                                                                                     |                                                                                                                                                                                                                                                                                                                                                                      | Nucleoporin Nup85-like [IPRO11502] (2)                                                                                                                                                                                                                                                                                                                                                                                                                                 | scaffold_1_mRNA_421.1            | C_unshiu_00006_mRNA_69.1     | -                               |
| GF0019993 | 1                             | 1                         | 0                            | Hypothetical protein (2)                                                                                                                                                   |                                                                                                                                                                                                                                                                                                                                                                      |                                                                                                                                                                                                                                                                                                                                                                                                                                                                        | scaffold_1_mRNA_42.1             | C_unshiu_00005_mRNA_153.1    | -                               |
| GF0019992 | 1                             | 1                         | 0                            | Hypothetical protein (2)                                                                                                                                                   | protein binding [GO:0005515 molecular_function] (2)                                                                                                                                                                                                                                                                                                                  | Ankyrin repeat-containing domain [IPRO20863] (2); Ankyrin repeat [IPRO02110] (2); PGG domain [IPRO26961] (1)                                                                                                                                                                                                                                                                                                                                                           | scaffold_1_mRNA_408.1            | C_unshiu_00006_mRNA_86.1     | -                               |
| GF0019991 | 1                             | 1                         | 0                            | Hypothetical protein (2)                                                                                                                                                   |                                                                                                                                                                                                                                                                                                                                                                      | Ankyrin repeat-containing domain [IPRO20863] (2)                                                                                                                                                                                                                                                                                                                                                                                                                       | scaffold_1_mRNA_405.1            | C_unshiu_00006_mRNA_88.1     | -                               |
| GF0019989 | 1                             | 1                         | 0                            | Hypothetical protein (2)                                                                                                                                                   | tocopherol cyclase activity [GO:0009976 molecular_function] (2)                                                                                                                                                                                                                                                                                                      | Tocopherol cyclase [IPRO25893] (2)                                                                                                                                                                                                                                                                                                                                                                                                                                     | scaffold_1_mRNA_395.1            | C_unshiu_00006_mRNA_97.1     | -                               |
| GF0019988 | 1                             | 1                         | 0                            | Putative hydrolase YtaP (2)                                                                                                                                                | proteolysis [GO:0006508 biological_process] (1); serine-type peptidase activity [GO:0008236 molecular_function] (1)                                                                                                                                                                                                                                                  | Alpha/Beta hydrolase fold [IPRO29058] (2); Alpha/beta hydrolase 6d/5 [IPRO29059] (1); Peptidase S9, prolyl oligopeptidase, catalytic domain [IPRO1375] (1)                                                                                                                                                                                                                                                                                                             | scaffold_1_mRNA_388.1            | C_unshiu_00006_mRNA_103.1    | -                               |
| GF0019987 | 1                             | 1                         | 0                            | Hypothetical protein (2)                                                                                                                                                   |                                                                                                                                                                                                                                                                                                                                                                      |                                                                                                                                                                                                                                                                                                                                                                                                                                                                        | scaffold_1_mRNA_386.2            | C_unshiu_00006_mRNA_105.1    | -                               |
| GF0019986 | 1                             | 1                         | 0                            | Putative VHS/GAT domain containing family protein (2)                                                                                                                      | intracellular [GO:0005622 cellular_component] (2); intracellular protein transport [GO:0006886 biological_process] (2)                                                                                                                                                                                                                                               | GAT domain [IPRO04152] (2); ENTH/VHS [IPRO08942] (2); VHS domain [IPRO20104] (2); VHS subgroup [IPRO8295] (1)                                                                                                                                                                                                                                                                                                                                                          | scaffold_1_mRNA_385.1            | C_unshiu_00006_mRNA_106.1    | -                               |
| GF0019985 | 1                             | 1                         | 0                            | Hypothetical protein (2)                                                                                                                                                   | integral component of membrane [GO:0016021 cellular_component] (2)                                                                                                                                                                                                                                                                                                   | Mpv17/PMP22 [IPRO07248] (2)                                                                                                                                                                                                                                                                                                                                                                                                                                            | scaffold_1_mRNA_371.1            | C_unshiu_00006_mRNA_121.1    | -                               |
| GF0019984 | 1                             | 1                         | 0                            | Hypothetical protein (2)                                                                                                                                                   | heme binding [GO:0020037 molecular_function] (2); iron ion binding [GO:0005506 molecular_function] (2); oxidation-reduction process [GO:005114 biological_process] (2); oxidoreductase activity, acting on paired donors, with incorporation or reduction of molecular oxygen [GO:0016705 molecular_function] (2)                                                    | Cytochrome P450 [IPRO01128] (2); Cytochrome P450, conserved site [IPRO17972] (2)                                                                                                                                                                                                                                                                                                                                                                                       | scaffold_1_mRNA_37.1             | C_unshiu_00003_mRNA_147.1    | -                               |
| GF0019983 | 1                             | 1                         | 0                            | Hypothetical protein (1); Leucine-rich repeat extensin-like protein 7 (1)                                                                                                  | protein binding [GO:0005515 molecular_function] (2)                                                                                                                                                                                                                                                                                                                  | Leucine-rich repeat domain, L domain-like [IPRO32675] (2); Leucine-rich repeat [IPRO01611] (2); Leucine-rich repeat-containing N-terminal, plant-type [IPRO13210] (1)                                                                                                                                                                                                                                                                                                  | scaffold_1_mRNA_360.1            | C_unshiu_01269_mRNA_5.1      | -                               |
| GF0019982 | 1                             | 1                         | 0                            | Hypothetical protein (1); Zinc finger CCH1 domain-containing protein 16 (1)                                                                                                | metal ion binding [GO:0046872 molecular_function] (2)                                                                                                                                                                                                                                                                                                                | Zinc finger, CCH-type [IPRO00571] (2)                                                                                                                                                                                                                                                                                                                                                                                                                                  | scaffold_1_mRNA_360.1            | C_unshiu_01269_mRNA_6.1      | -                               |
| GF0019981 | 1                             | 1                         | 0                            | Hypothetical protein (2)                                                                                                                                                   | protein kinase activity [GO:0004672 molecular_function] (2); protein phosphorylation [GO:0006468 biological_process] (2); ATP binding [GO:0005524 molecular_function] (2)                                                                                                                                                                                            | Protein kinase-like domain [IPRO11009] (2); Protein kinase domain [IPRO00719] (2)                                                                                                                                                                                                                                                                                                                                                                                      | scaffold_1_mRNA_359.1            | C_unshiu_01269_mRNA_7.1      | -                               |
| GF0019979 | 1                             | 1                         | 0                            | Hypothetical protein (2)                                                                                                                                                   |                                                                                                                                                                                                                                                                                                                                                                      |                                                                                                                                                                                                                                                                                                                                                                                                                                                                        | scaffold_1_mRNA_359.2            | C_unshiu_00591_mRNA_12.1     | -                               |
| GF0019978 | 1                             | 1                         | 0                            | ZincRING finger 3 (2)                                                                                                                                                      | protein binding [GO:0005515 molecular_function] (2); zinc ion binding [GO:0008270 molecular_function] (2)                                                                                                                                                                                                                                                            | Zinc finger, RING-FYVE/PHD-type [IPRO13083] (2); Zinc finger, RING-type [IPRO1841] (2)                                                                                                                                                                                                                                                                                                                                                                                 | scaffold_1_mRNA_358.1            | C_unshiu_00591_mRNA_19.1     | -                               |
| GF0019968 | 1                             | 1                         | 0                            | Low temperature and salt responsive protein family isoform 1 (2)                                                                                                           | integral component of membrane [GO:0016021 cellular_component] (2)                                                                                                                                                                                                                                                                                                   | Proteolipid membrane potential modulator [IPRO06612] (2)                                                                                                                                                                                                                                                                                                                                                                                                               | scaffold_1_mRNA_3513.1           | C_unshiu_01195_mRNA_3.1      | -                               |
| GF0019966 | 1                             | 1                         | 0                            | Hydroxycinnamoyl-CoA shikimate/quinamate hydroxycinnamoyltransferase (1); Hydroxycinnamoyl-CoA shikimate/quinamate hydroxycinnamoyl transferase (1)                        | transferase activity, transferring acyl groups other than amino-acyl groups [GO:0016747 molecular_function] (2)                                                                                                                                                                                                                                                      | Transferase [IPRO03480] (2); Chlorophenicol acetyltransferase-like domain [IPRO23213] (1)                                                                                                                                                                                                                                                                                                                                                                              | scaffold_1_mRNA_3507.1           | C_unshiu_01195_mRNA_8.1      | -                               |
| GF0019963 | 1                             | 1                         | 0                            | Hypothetical protein (2)                                                                                                                                                   | nucleic acid binding [GO:0003676 molecular_function] (1); protein binding [GO:0005515 molecular_function] (1)                                                                                                                                                                                                                                                        | Kelch-type beta propeller [IPRO15915] (1); Ribonuclease H-like domain [IPRO12337] (1)                                                                                                                                                                                                                                                                                                                                                                                  | scaffold_1_mRNA_3494.1           | C_unshiu_01447_mRNA_7.1      | -                               |
| GF0019962 | 1                             | 1                         | 0                            | Hypothetical protein (1); Pentatricopeptide repeat-containing family protein (1)                                                                                           | protein binding [GO:0005515 molecular_function] (2)                                                                                                                                                                                                                                                                                                                  | Zinc finger, RING-FYVE/PHD-type [IPRO13083] (2); Tetratricopeptide repeat [IPRO02885] (2); Tetratricopeptide-like helical domain [IPRO11990] (2)                                                                                                                                                                                                                                                                                                                       | scaffold_1_mRNA_3487.1           | C_unshiu_00562_mRNA_3.1      | -                               |
| GF0019960 | 1                             | 1                         | 0                            | Hydroxycinnamoyl-CoA shikimate/quinamate hydroxycinnamoyl transferase (2)                                                                                                  | transferase activity, transferring acyl groups other than amino-acyl groups [GO:0016747 molecular_function] (2)                                                                                                                                                                                                                                                      | Transferase [IPRO03480] (2); Chlorophenicol acetyltransferase-like domain [IPRO23213] (1)                                                                                                                                                                                                                                                                                                                                                                              | scaffold_1_mRNA_3461.1           | C_unshiu_00348_mRNA_4.1      | -                               |
| GF0019959 | 1                             | 1                         | 0                            | Tetratricopeptide repeat protein 1 (2)                                                                                                                                     | protein binding [GO:0005515 molecular_function] (2)                                                                                                                                                                                                                                                                                                                  | Tetratricopeptide-like helical domain [IPRO11990] (2); Tetratricopeptide repeat-containing domain [IPRO13026] (2); Tetratricopeptide repeat [IPRO19734] (2); Tetratricopeptide repeat 1 [IPRO01400] (1)                                                                                                                                                                                                                                                                | scaffold_1_mRNA_3460.1           | C_unshiu_00348_mRNA_5.1      | -                               |
| GF0019957 | 1                             | 1                         | 0                            | Cinnamoyl-CoA reductase 1 (2)                                                                                                                                              | coenzyme binding [GO:0005062 molecular_function] (2); catalytic activity [GO:0003824 molecular_function] (2)                                                                                                                                                                                                                                                         | epimerase (dehydratase, N-terminal domain) [IPRO01509] (1); NAD-dependent epimerase/dehydratase [IPRO01509] (1)                                                                                                                                                                                                                                                                                                                                                        | scaffold_1_mRNA_3457.1           | C_unshiu_01142_mRNA_1.1      | -                               |
| GF0019951 | 1                             | 1                         | 0                            | Putative bigh-2-associated protein p12 (2)                                                                                                                                 |                                                                                                                                                                                                                                                                                                                                                                      | Equippin pollen allergen, DPBB domain [IPRO07112] (2); RlpA-like protein, double-psi beta-barrel domain [IPRO09009] (1); RlpA-like double-psi beta-barrel domain [IPRO09009] (1)                                                                                                                                                                                                                                                                                       | scaffold_1_mRNA_3431.1           | C_unshiu_00348_mRNA_30.1     | -                               |

| ID        | Num in <i>C. clementinae</i> | Num in <i>C. acutis</i> | Num in <i>P. trifoliata</i> | Note                                                                                                                                  | GO                                                                                                                                                                                                                                                                                                                                                                                                                 | InterPro                                                                                                                                                                                                                                                                                  | Members in <i>C. clementinae</i> | Members in <i>C. acutis</i> | Members in <i>P. trifoliata</i> |
|-----------|------------------------------|-------------------------|-----------------------------|---------------------------------------------------------------------------------------------------------------------------------------|--------------------------------------------------------------------------------------------------------------------------------------------------------------------------------------------------------------------------------------------------------------------------------------------------------------------------------------------------------------------------------------------------------------------|-------------------------------------------------------------------------------------------------------------------------------------------------------------------------------------------------------------------------------------------------------------------------------------------|----------------------------------|-----------------------------|---------------------------------|
| GF0019950 | 1                            | 1                       | 1                           | Cytochrome P450 (1); Cytochrome P450, family 81, subfamily D, polypeptide 8, putative (1)                                             | oxidation-reduction process [GO:005114 biological_process] (2); oxidoreductase activity, acting on paired donors, with incorporation or reduction of molecular oxygen [GO:0016705 molecular_function] (2); heme binding [GO:0020037 molecular_function] (2); iron ion binding [GO:0005506 molecular_function] (2)                                                                                                  | Cytochrome P450, conserved site [IPRO17972] (2); Cytochrome P450, E-class, group 1 [IPRO02401] (2); Cytochrome P450 [IPRO01128] (2)                                                                                                                                                       | scaffold_1_mRNA_3415.1           | C_unshiu_00237_mRNA_15.1    | -                               |
| GF0019947 | 1                            | 1                       | 1                           | DUF1795-like photosystem II reaction center P68 family protein (2)                                                                    | photosystem II oxygen-evolving complex [GO:0008654 cellular_component] (1); photosystem II [GO:0000523 cellular_component] (1); photosynthesis [GO:0015979 biological_process] (1); calcium ion binding [GO:0005509 molecular_function] (1); extrinsic component of membrane [GO:0019898 cellular_component] (1)                                                                                                   | MogI/PsbP, alpha beta/alpha sandwich [IPRO16123] (2); PsbP family [IPRO02683] (1)                                                                                                                                                                                                         | scaffold_1_mRNA_339.1            | C_unshiu_00833_mRNA_4.1     | -                               |
| GF0019946 | 1                            | 1                       | 1                           | 0 Hypothetical protein (2)                                                                                                            | carbohydrate metabolic process [GO:0005975 biological_process] (2); hydrolase activity, hydrolyzing O-glycosyl compounds [GO:0004553 molecular_function] (2)                                                                                                                                                                                                                                                       | Concanavalin A-like lectin/glucanase domain [IPRO13320] (2); Glycoside hydrolase family 16 [IPRO00757] (2)                                                                                                                                                                                | scaffold_1_mRNA_3384.1           | C_unshiu_02081_mRNA_6.1     | -                               |
| GF0019945 | 1                            | 1                       | 1                           | 0 CTC-interacting domain 5, putative isoform 1 (2)                                                                                    | protein binding [GO:0005515 molecular_function] (2)                                                                                                                                                                                                                                                                                                                                                                | UBA-like [IPRO09060] (2); Ubiquitin system component Cue [IPRO03892] (2)                                                                                                                                                                                                                  | scaffold_1_mRNA_338.1            | C_unshiu_00833_mRNA_5.1     | -                               |
| GF0019943 | 1                            | 1                       | 1                           | 0 Hypothetical protein (1); Probable endomembrane glucosyltransferase protein 23 (1)                                                  | apoplast [GO:0040046 cellular_component] (2); cellular glucan metabolic process [GO:0006073 biological_process] (2); hydrolase activity, hydrolyzing O-glycosyl compounds [GO:0004553 molecular_function] (2); cell wall [GO:0005618 cellular_component] (2); carbohydrate metabolic process [GO:0005975 biological_process] (2); xyloglucan xyloglucosyl transferase activity [GO:0016762 molecular_function] (2) | Glycoside hydrolase family 16 [IPRO00757] (2); Nucleotide-diphosphate transferase [IPRO05069] (2); Xyloglucan endo-transglucosylase, C-terminal [IPRO10713] (2); Glycoside hydrolase, family 16, active site [IPRO08263] (2); Concanavalin A-like lectin/glucanase domain [IPRO13320] (2) | scaffold_1_mRNA_3375.1           | C_unshiu_02828_mRNA_3.1     | -                               |
| GF0019941 | 1                            | 1                       | 1                           | 0 Hypothetical protein (2)                                                                                                            |                                                                                                                                                                                                                                                                                                                                                                                                                    | DNA-binding pseudobarrel domain [IPRO15300] (1)                                                                                                                                                                                                                                           | scaffold_1_mRNA_3357.1           | C_unshiu_00347_mRNA_30.1    | -                               |
| GF0019940 | 1                            | 1                       | 1                           | 0 Hypothetical protein (2)                                                                                                            |                                                                                                                                                                                                                                                                                                                                                                                                                    | Pre-mRNA splicing Psp18-interacting factor [IPRO21715] (2)                                                                                                                                                                                                                                | scaffold_1_mRNA_3355.1           | C_unshiu_00347_mRNA_29.1    | -                               |
| GF0019937 | 1                            | 1                       | 1                           | 0 Hypothetical protein (2)                                                                                                            |                                                                                                                                                                                                                                                                                                                                                                                                                    |                                                                                                                                                                                                                                                                                           | scaffold_1_mRNA_3350.1           | C_unshiu_00347_mRNA_26.1    | -                               |
| GF0019936 | 1                            | 1                       | 1                           | 0 Replication protein A 32 kDa subunit (2)                                                                                            | DNA replication [GO:0006260 biological_process] (2); DNA recombination [GO:0006310 biological_process] (2); DNA repair [GO:0006281 biological_process] (2); DNA binding [GO:0001677 molecular_function] (2); nucleus [GO:0005634 cellular_component] (2); nucleic acid binding [GO:0003676 molecular_function] (2)                                                                                                 | OB-fold nucleic acid binding domain, AA-RNA synthetase-type [IPRO04365] (2); Replication factor A protein 2 [IPRO14646] (2); Replication protein A, C-terminal [IPRO14892] (2); Winged helix-helix DNA-binding domain [IPRO11991] (2); Nucleic acid-binding, OB-fold [IPRO12340] (2)      | scaffold_1_mRNA_3342.2           | C_unshiu_00347_mRNA_18.2    | -                               |
| GF0019935 | 1                            | 1                       | 1                           | 0 Hypothetical protein (2)                                                                                                            | integral component of membrane [GO:0016021 cellular_component] (2); prenyltransferase activity [GO:0004659 molecular_function] (1); transferase activity, transferring alkyl or aryl (other than methyl) groups [GO:0016765 molecular_function] (1)                                                                                                                                                                | UbiA prenyltransferase family [IPRO00537] (2)                                                                                                                                                                                                                                             | scaffold_1_mRNA_3329.2           | C_unshiu_00347_mRNA_6.1     | -                               |
| GF0019932 | 1                            | 1                       | 1                           | 0 Hypothetical protein (2)                                                                                                            |                                                                                                                                                                                                                                                                                                                                                                                                                    |                                                                                                                                                                                                                                                                                           | scaffold_1_mRNA_3325.1           | C_unshiu_00347_mRNA_3.1     | -                               |
| GF0019930 | 1                            | 1                       | 1                           | 0 Hypothetical protein (2)                                                                                                            |                                                                                                                                                                                                                                                                                                                                                                                                                    |                                                                                                                                                                                                                                                                                           | scaffold_1_mRNA_3316.1           | C_unshiu_00105_mRNA_3316.1  | -                               |
| GF0019929 | 1                            | 1                       | 1                           | 0 Pentatricopeptide repeat-containing protein, putative isoform 2 (1); Pentatricopeptide repeat-containing protein, mitochondrial (1) | serine-type endopeptidase activity [GO:0004252 molecular_function] (2); proteolysis [GO:0006908 biological_process] (2)                                                                                                                                                                                                                                                                                            | Peptidase S8/S53 domain [IPRO00209] (2); Pentatricopeptide repeat [IPRO02885] (2)                                                                                                                                                                                                         | scaffold_1_mRNA_3304.1           | C_unshiu_00105_mRNA_21.1    | -                               |
| GF0019927 | 1                            | 1                       | 1                           | 0 Pentatricopeptide (2)                                                                                                               | protein binding [GO:0005515 molecular_function] (1)                                                                                                                                                                                                                                                                                                                                                                | Pentatricopeptide repeat [IPRO02885] (2); Tetra- or pentapeptide-like helical domain [IPRO11990] (1)                                                                                                                                                                                      | scaffold_1_mRNA_3295.1           | C_unshiu_00105_mRNA_30.1    | -                               |
| GF0019924 | 1                            | 1                       | 1                           | 0 Mitotic-spindle organizing protein 1B (2)                                                                                           | gamma-tubulin complex localization [GO:0033566 biological_process] (1); gamma-tubulin ring complex [GO:0005274 cellular_component] (1)                                                                                                                                                                                                                                                                             | Mitotic-spindle organizing protein 1 [IPRO22214] (1); Protein of unknown function DUF3743 [IPRO22214] (1)                                                                                                                                                                                 | scaffold_1_mRNA_3285.1           | C_unshiu_00105_mRNA_38.1    | -                               |
| GF0019923 | 1                            | 1                       | 1                           | 0 Hypothetical protein (2)                                                                                                            | ATPase activity, coupled to transmembrane movement of substances [GO:0042626 molecular_function] (2); transmembrane transport [GO:0055085 biological_process] (2); ATP binding [GO:0005524 molecular_function] (2); integral component of membrane [GO:0016021 cellular_component] (2); transport [GO:0006810 biological_process] (2)                                                                              | ABC transporter type 1, transmembrane domain [IPRO11527] (2); P-loop containing nucleoside triphosphate hydrolase [IPRO027417] (1)                                                                                                                                                        | scaffold_1_mRNA_3277.1           | C_unshiu_00105_mRNA_46.1    | -                               |
| GF0019922 | 1                            | 1                       | 1                           | 0 Hypothetical protein (2)                                                                                                            |                                                                                                                                                                                                                                                                                                                                                                                                                    |                                                                                                                                                                                                                                                                                           | scaffold_1_mRNA_3260.1           | C_unshiu_00131_mRNA_24.1    | -                               |
| GF0019921 | 1                            | 1                       | 1                           | 0 UPR1414 transmembrane protein 0 C2orf30 like (2)                                                                                    |                                                                                                                                                                                                                                                                                                                                                                                                                    | Protein of unknown function DUF872, transmembrane [IPRO08590] (2)                                                                                                                                                                                                                         | scaffold_1_mRNA_3252.1           | C_unshiu_00131_mRNA_32.1    | -                               |
| GF0019919 | 1                            | 1                       | 1                           | 0 Hypothetical protein (2)                                                                                                            |                                                                                                                                                                                                                                                                                                                                                                                                                    |                                                                                                                                                                                                                                                                                           | scaffold_1_mRNA_323.1            | C_unshiu_00309_mRNA_9.1     | -                               |
| GF0019918 | 1                            | 1                       | 1                           | 0 Hypothetical protein (2)                                                                                                            | binding [GO:0005488 molecular_function] (2); protein binding [GO:0005515 molecular_function] (1); microtubule [GO:0005874 cellular_component] (1)                                                                                                                                                                                                                                                                  | Armadillo-like helical [IPRO19899] (2); Armadillo-type fold [IPRO16024] (2); HEAT repeat associated with sister chromatid cohesion protein [IPRO26003] (1); HEAT repeat [IPRO00357] (1); MT-associated protein [IPRO1990] (1); TOR1FOLIA1/SPIRAL2-like [IPRO33337] (1)                    | scaffold_1_mRNA_3226.1           | C_unshiu_00131_mRNA_58.1    | -                               |
| GF0019917 | 1                            | 1                       | 1                           | 0 Squalene monooxygenase (2)                                                                                                          | squalene monooxygenase activity [GO:0004506 molecular_function] (2); integral component of membrane [GO:0016021 cellular_component] (2); oxidoreductase activity [GO:0016491 molecular_function] (2); oxidation-reduction process [GO:0055114 biological_process] (2); flavin adenine dinucleotide binding [GO:0005060 molecular_function] (2)                                                                     | FAD/NAD(P)-binding domain [IPRO23753] (2); Squalene epoxidase [IPRO13698] (2)                                                                                                                                                                                                             | scaffold_1_mRNA_3225.1           | C_unshiu_00583_mRNA_16.1    | -                               |
| GF0019913 | 1                            | 1                       | 1                           | 0 Organic cation/carnitine transporter 7 (2)                                                                                          | transmembrane transport [GO:0055085 biological_process] (2); transmembrane transporter activity [GO:0022857 molecular_function] (2); integral component of membrane [GO:0016021 cellular_component] (2)                                                                                                                                                                                                            | Major facilitator, sugar transporter-like [IPRO05828] (2); Major facilitator superfamily domain [IPRO20846] (2)                                                                                                                                                                           | scaffold_1_mRNA_3204.1           | C_unshiu_00315_mRNA_15.1    | -                               |
| GF0019912 | 1                            | 1                       | 1                           | 0 Synaptic vesicle 2-related protein (2)                                                                                              | transmembrane transporter activity [GO:0022857 molecular_function] (2); integral component of membrane [GO:0016021 cellular_component] (2); transmembrane transport [GO:0055085 biological_process] (2)                                                                                                                                                                                                            | Major facilitator, sugar transporter-like [IPRO05828] (2); Major facilitator superfamily domain [IPRO20846] (2)                                                                                                                                                                           | scaffold_1_mRNA_3202.1           | C_unshiu_00315_mRNA_13.1    | -                               |
| GF0019909 | 1                            | 1                       | 1                           | 0 Glucosidase II beta subunit-like protein (2)                                                                                        |                                                                                                                                                                                                                                                                                                                                                                                                                    | Mannose-6-phosphate receptor binding domain [IPRO09011] (2); Glucosidase II beta subunit-like [IPRO12913] (2)                                                                                                                                                                             | scaffold_1_mRNA_3197.1           | C_unshiu_00066_mRNA_3.1     | -                               |
| GF0019908 | 1                            | 1                       | 1                           | 0 Hypothetical protein (2)                                                                                                            |                                                                                                                                                                                                                                                                                                                                                                                                                    | Leucine-rich repeat domain, L domain-like [IPRO32675] (2)                                                                                                                                                                                                                                 | scaffold_1_mRNA_3194.1           | C_unshiu_00066_mRNA_6.1     | -                               |
| GF0019900 | 1                            | 1                       | 1                           | 0 Chloroplast photosystem II subunit X (2)                                                                                            | membrane [GO:0016020 cellular_component] (2); photosynthesis [GO:0015979 biological_process] (2); photosystem II [GO:0000523 cellular_component] (2)                                                                                                                                                                                                                                                               | Photosystem II PsbX [IPRO09518] (2)                                                                                                                                                                                                                                                       | scaffold_1_mRNA_3093.1           | C_unshiu_00498_mRNA_13.1    | -                               |
| GF0019896 | 1                            | 1                       | 1                           | 0 Pentatricopeptide repeat-containing family protein (2)                                                                              | protein binding [GO:0005515 molecular_function] (2)                                                                                                                                                                                                                                                                                                                                                                | Pentatricopeptide repeat [IPRO02885] (2); Tetra- or pentapeptide-like helical domain [IPRO11990] (1)                                                                                                                                                                                      | scaffold_1_mRNA_3059.1           | C_unshiu_00150_mRNA_30.1    | -                               |
| GF0019895 | 1                            | 1                       | 1                           | 0 Putative nucleodoxin 1 (2)                                                                                                          | oxidation-reduction process [GO:0055114 biological_process] (1); protein-disulfide reductase activity [GO:0004734 molecular_function] (1); cell redox homeostasis [GO:0045454 biological_process] (1)                                                                                                                                                                                                              | Thioredoxin-like fold [IPRO12336] (2); DC1 [IPRO04146] (1); C1-like [IPRO11424] (1); Thioredoxin domain [IPRO13746] (1); Ricin B, lectin domain [IPRO00772] (1)                                                                                                                           | scaffold_1_mRNA_3056.1           | C_unshiu_00150_mRNA_27.1    | -                               |
| GF0019894 | 1                            | 1                       | 1                           | 0 Hypothetical protein (2)                                                                                                            | oxidation-reduction process [GO:0055114 biological_process] (2); oxidoreductase activity [GO:0016491 molecular_function] (2)                                                                                                                                                                                                                                                                                       | FAD/NAD(P)-binding domain [IPRO23753] (2)                                                                                                                                                                                                                                                 | scaffold_1_mRNA_304.1            | C_unshiu_01113_mRNA_12.1    | -                               |
| GF0019893 | 1                            | 1                       | 1                           | 0 Monofunctional lysine-ketoglutarate reductase 1 (2)                                                                                 |                                                                                                                                                                                                                                                                                                                                                                                                                    | Alanine dehydrogenase/pyridine nucleotide transhydrogenase, N-terminal [IPRO07886] (2); Alanine dehydrogenase/pyridine nucleotide transhydrogenase, NAD(P)-binding domain [IPRO07698] (2)                                                                                                 | scaffold_1_mRNA_3033.1           | C_unshiu_00150_mRNA_2.1     | -                               |
| GF0019892 | 1                            | 1                       | 1                           | 0 Invertase/pectin methyltransferase inhibitor 0 family protein (1); Pectinesterase inhibitor (1)                                     | enzyme inhibitor activity [GO:0004857 molecular_function] (2); negative regulation of catalytic activity [GO:0043086 biological_process] (1); pectinesterase inhibitor activity [GO:0046910 molecular_function] (1)                                                                                                                                                                                                | Pectinesterase inhibitor domain [IPRO06501] (2); Pectinesterase inhibitor, plant [IPRO34086] (1)                                                                                                                                                                                          | scaffold_1_mRNA_3031.1           | C_unshiu_02111_mRNA_1.1     | -                               |

| ID        | Num. in <i>C. clementinae</i> | Num. in <i>C. acutis</i> | Num. in <i>P. trifoliata</i> | Note                                                                                                  | GO                                                                                                                                                                                                                                                                                                                                                                                                                                                                                                                                                                                                                                     | InterPro                                                                                                                                                                                                                                                                                                                     | Members in <i>C. clementinae</i> | Members in <i>C. acutis</i> | Members in <i>P. trifoliata</i> |
|-----------|-------------------------------|--------------------------|------------------------------|-------------------------------------------------------------------------------------------------------|----------------------------------------------------------------------------------------------------------------------------------------------------------------------------------------------------------------------------------------------------------------------------------------------------------------------------------------------------------------------------------------------------------------------------------------------------------------------------------------------------------------------------------------------------------------------------------------------------------------------------------------|------------------------------------------------------------------------------------------------------------------------------------------------------------------------------------------------------------------------------------------------------------------------------------------------------------------------------|----------------------------------|-----------------------------|---------------------------------|
| GF0019891 | 1                             | 1                        | 0                            | Monoxygenase family protein (2)                                                                       | oxidoreductase activity [GO:0016491 molecular_function] (2); oxidation-reduction process [GO:005514 biological_process] (2)                                                                                                                                                                                                                                                                                                                                                                                                                                                                                                            | FAD/NAD(P) <sup>+</sup> binding domain [IPR023753] (2)                                                                                                                                                                                                                                                                       | scaffold_1_mRNA_302.1            | C_unshiu_01113_mRNA_11.1    | -                               |
| GF0019890 | 1                             | 1                        | 0                            | Kinesin-like protein NACK2 (2)                                                                        | microtubule binding [GO:0008017 molecular_function] (2); microtubule motor activity [GO:0003777 molecular_function] (2); microtubule-based movement [GO:0007018 biological_process] (2); ATP binding [GO:0005524 molecular_function] (2)                                                                                                                                                                                                                                                                                                                                                                                               | Kinesin motor domain, conserved site [IPR019821] (2); Kinesin motor domain [IPR001752] (2); NPK1-activating kinesin-like protein, C-terminal [IPR021881] (2); P-loop containing nucleoside triphosphate hydrolase [IPR027417] (2); Kinesin-like protein [IPR027640] (1)                                                      | scaffold_1_mRNA_3013.1           | C_unshiu_00341_mRNA_13.1    | -                               |
| GF0019889 | 1                             | 1                        | 0                            | Sucrose synthase (2)                                                                                  | sucrose metabolic process [GO:0005985 biological_process] (2); sucrose synthase activity [GO:0016157 molecular_function] (2)                                                                                                                                                                                                                                                                                                                                                                                                                                                                                                           | Sucrose synthase, plant/cyanobacteria [IPR012820] (2); Glycosyl transferase, family 1 [IPR001296] (2); Sucrose synthase [IPR000368] (2)                                                                                                                                                                                      | scaffold_1_mRNA_3012.4           | C_unshiu_00341_mRNA_12.3    | -                               |
| GF0019888 | 1                             | 1                        | 0                            | DnaJ like subfamily C member 28 (1); Hypothetical protein (1)                                         | DnaJ like subfamily C member 28 [GO:1901671 biological_process] (2); transition metal ion binding [GO:0046914 molecular_function] (2); protein folding [GO:0006457 biological_process] (2)                                                                                                                                                                                                                                                                                                                                                                                                                                             | DnaJ homologue, subfamily C, member 28, conserved domain [IPR010861] (1)                                                                                                                                                                                                                                                     | scaffold_1_mRNA_3011.1           | C_unshiu_00341_mRNA_11.1    | -                               |
| GF0019887 | 1                             | 1                        | 0                            | Hypothetical protein (1); Mitochondrial ferredoxin 2 (1)                                              | Hypothetical protein (1); Mitochondrial ferredoxin 2 [GO:0005737 cellular_component] (2); ATP binding [GO:0005524 molecular_function] (2); positive regulation of superoxide dismutase activity [GO:1901671 biological_process] (2); transition metal ion binding [GO:0046914 molecular_function] (2); transcription factor activity, sequence-specific DNA binding [GO:0003700 molecular_function] (2); regulation of transcription, DNA-templated [GO:0006355 biological_process] (2)                                                                                                                                                | Beta-grasp domain [IPR012675] (1)                                                                                                                                                                                                                                                                                            | scaffold_1_mRNA_3005.1           | C_unshiu_00341_mRNA_6.1     | -                               |
| GF0019885 | 1                             | 1                        | 0                            | 20 kDa chaperonin, chloroplastic (2)                                                                  | cellular component [GO:0005524 molecular_function] (2); positive regulation of superoxide dismutase activity [GO:1901671 biological_process] (2); transition metal ion binding [GO:0046914 molecular_function] (2); protein folding [GO:0006457 biological_process] (2)                                                                                                                                                                                                                                                                                                                                                                | GroES chaperonin family [IPR020818] (2); GroES-like [IPR011032] (2); Chaperonin GroES, conserved site [IPR018300] (2); Chaperonin Cpn20 [IPR017416] (2)                                                                                                                                                                      | scaffold_1_mRNA_2995.1           | C_unshiu_00047_mRNA_91.1    | -                               |
| GF0019884 | 1                             | 1                        | 0                            | Ethylene-responsive transcription factor ERF18 (2)                                                    | Ethylene-responsive transcription factor activity, sequence-specific DNA binding [GO:0003700 molecular_function] (2); regulation of transcription, DNA-templated [GO:0006355 biological_process] (2)                                                                                                                                                                                                                                                                                                                                                                                                                                   | DNA-binding domain [IPR016177] (2); AP2/ERF domain [IPR001471] (2)                                                                                                                                                                                                                                                           | scaffold_1_mRNA_2994.1           | C_unshiu_00047_mRNA_90.1    | -                               |
| GF0019883 | 1                             | 1                        | 0                            | Hypothetical protein (2)                                                                              | Hypothetical protein (2)                                                                                                                                                                                                                                                                                                                                                                                                                                                                                                                                                                                                               | PA domain [IPR003137] (2); Peptidase S8/S53 domain [IPR000209] (2); Peptidase S8, subtilisin-related [IPR015500] (2); Peptidase S8 [IPR015500] (2); Peptidase S8 propeptide/protease inhibitor 19 [IPR010259] (1); Cucumis-like catalytic domain [IPR034197] (1); Protease propeptides/protease inhibitor 19 [IPR009020] (1) | scaffold_1_mRNA_297.1            | C_unshiu_01113_mRNA_3.1     | -                               |
| GF0019882 | 1                             | 1                        | 0                            | Subtilisin-like serine protease (2)                                                                   | proteolysis [GO:0006508 biological_process] (2); serine-type endopeptidase activity [GO:0004252 molecular_function] (2)                                                                                                                                                                                                                                                                                                                                                                                                                                                                                                                | Peptidase S8, subtilisin-related [IPR015500] (2); Peptidase S8 [IPR015500] (2); Peptidase S8 propeptide/protease inhibitor 19 [IPR010259] (1); Cucumis-like catalytic domain [IPR034197] (1); Protease propeptides/protease inhibitor 19 [IPR009020] (1)                                                                     | scaffold_1_mRNA_2967.1           | C_unshiu_00047_mRNA_62.1    | -                               |
| GF0019881 | 1                             | 1                        | 0                            | Hypothetical protein (2)                                                                              | Hypothetical protein (2)                                                                                                                                                                                                                                                                                                                                                                                                                                                                                                                                                                                                               | Sodium/calcium exchanger membrane region [IPR008873] (2); Amino acid transporter, transmembrane domain [IPR013057] (2); Calcium/proton exchanger CAX [IPR004798] (1)                                                                                                                                                         | scaffold_1_mRNA_296.1            | C_unshiu_01113_mRNA_4.1     | -                               |
| GF0019880 | 1                             | 1                        | 0                            | Hypothetical protein (1); Rho guanine nucleotide exchange factor 7, putative (1)                      | Hypothetical protein (1); Rho guanine nucleotide exchange factor 7, putative [GO:0008816 biological_process] (1); calcium/proton antiporter activity [GO:0015369 molecular_function] (1)                                                                                                                                                                                                                                                                                                                                                                                                                                               | Sodium/calcium exchanger membrane region [IPR008873] (2); Amino acid transporter, transmembrane domain [IPR013057] (2); Calcium/proton exchanger CAX [IPR004798] (1)                                                                                                                                                         | scaffold_1_mRNA_2958.1           | C_unshiu_00047_mRNA_52.1    | -                               |
| GF0019879 | 1                             | 1                        | 0                            | ORF3-responsive gene 4 isoform 2 (2)                                                                  | ORF3-responsive gene 4 isoform 2 [GO:0008816 biological_process] (1); calcium/proton antiporter activity [GO:0015369 molecular_function] (1)                                                                                                                                                                                                                                                                                                                                                                                                                                                                                           | Sodium/calcium exchanger membrane region [IPR008873] (2); Amino acid transporter, transmembrane domain [IPR013057] (2); Calcium/proton exchanger CAX [IPR004798] (1)                                                                                                                                                         | scaffold_1_mRNA_2957.1           | C_unshiu_00047_mRNA_51.1    | -                               |
| GF0019878 | 1                             | 1                        | 0                            | Hypothetical protein (2)                                                                              | Hypothetical protein (2)                                                                                                                                                                                                                                                                                                                                                                                                                                                                                                                                                                                                               | Peptidase S8/S53 domain [IPR000209] (2); Peptidase S8, subtilisin-related [IPR015500] (1)                                                                                                                                                                                                                                    | scaffold_1_mRNA_295.1            | C_unshiu_01113_mRNA_5.1     | -                               |
| GF0019875 | 1                             | 1                        | 0                            | NB-ARC domain disease resistance protein (1); NB-ARC domain-containing disease resistance protein (1) | NB-ARC domain disease resistance protein (1); NB-ARC domain-containing disease resistance protein [GO:0044353 molecular_function] (2)                                                                                                                                                                                                                                                                                                                                                                                                                                                                                                  | NB-ARC [IPR002182] (2); P-loop containing nucleoside triphosphate hydrolase [IPR027417] (2); Leucine-rich repeat domain, L domain-like [IPR032675] (1)                                                                                                                                                                       | scaffold_1_mRNA_2933.1           | C_unshiu_00047_mRNA_27.1    | -                               |
| GF0019874 | 1                             | 1                        | 0                            | Hypothetical protein (2)                                                                              | transmembrane transport [GO:0055085 biological_process] (2); integral component of membrane [GO:0016021 cellular_component] (2); calcium ion transport [GO:0008816 biological_process] (1); calcium/proton antiporter activity [GO:0015369 molecular_function] (1)                                                                                                                                                                                                                                                                                                                                                                     | Sodium/calcium exchanger membrane region [IPR008873] (2); Amino acid transporter, transmembrane domain [IPR013057] (2); Calcium/proton exchanger CAX [IPR004798] (1)                                                                                                                                                         | scaffold_1_mRNA_2926.1           | C_unshiu_00047_mRNA_18.1    | -                               |
| GF0019873 | 1                             | 1                        | 0                            | Hypothetical protein (2)                                                                              | serine-type endopeptidase activity [GO:0004252 molecular_function] (2); proteolysis [GO:0006508 biological_process] (2)                                                                                                                                                                                                                                                                                                                                                                                                                                                                                                                | Peptidase S8/S53 domain [IPR000209] (2); Peptidase S8, subtilisin-related [IPR015500] (1)                                                                                                                                                                                                                                    | scaffold_1_mRNA_2917.1           | C_unshiu_00047_mRNA_9.1     | -                               |
| GF0019872 | 1                             | 1                        | 0                            | Hypothetical protein (2)                                                                              | Hypothetical protein (2)                                                                                                                                                                                                                                                                                                                                                                                                                                                                                                                                                                                                               | Endonuclease/tonuclease/phosphatase [IPR001535] (2)                                                                                                                                                                                                                                                                          | scaffold_1_mRNA_2911.1           | C_unshiu_01542_mRNA_6.1     | -                               |
| GF0019870 | 1                             | 1                        | 0                            | Non-LTR reverse transcriptase (1); Hypothetical protein (1)                                           | Non-LTR reverse transcriptase (1); Hypothetical protein (1)                                                                                                                                                                                                                                                                                                                                                                                                                                                                                                                                                                            | Domain of unknown function DUF2431 [IPR019446] (2); S-adenosyl-L-methionine-dependent methyltransferase [IPR029063] (2)                                                                                                                                                                                                      | scaffold_1_mRNA_2909.1           | C_unshiu_01542_mRNA_2.1     | -                               |
| GF0019869 | 1                             | 1                        | 0                            | DUF2431 domain protein (1); Hypothetical protein (1)                                                  | DUF2431 domain protein (1); Hypothetical protein (1)                                                                                                                                                                                                                                                                                                                                                                                                                                                                                                                                                                                   | Domain of unknown function DUF2431 [IPR019446] (2); S-adenosyl-L-methionine-dependent methyltransferase [IPR029063] (2)                                                                                                                                                                                                      | scaffold_1_mRNA_2907.1           | C_unshiu_00934_mRNA_13.1    | -                               |
| GF0019868 | 1                             | 1                        | 0                            | Hypothetical protein (2)                                                                              | Hypothetical protein (2)                                                                                                                                                                                                                                                                                                                                                                                                                                                                                                                                                                                                               | Domain of unknown function DUF2431 [IPR019446] (2); S-adenosyl-L-methionine-dependent methyltransferase [IPR029063] (2)                                                                                                                                                                                                      | scaffold_1_mRNA_2905.1           | C_unshiu_00133_mRNA_65.1    | -                               |
| GF0019867 | 1                             | 1                        | 0                            | Hypothetical protein (1); DUF2431 domain protein (1)                                                  | Hypothetical protein (1); DUF2431 domain protein (1)                                                                                                                                                                                                                                                                                                                                                                                                                                                                                                                                                                                   | Domain of unknown function DUF2431 [IPR019446] (2); S-adenosyl-L-methionine-dependent methyltransferase [IPR029063] (2)                                                                                                                                                                                                      | scaffold_1_mRNA_2904.1           | C_unshiu_01511_mRNA_15.1    | -                               |
| GF0019865 | 1                             | 1                        | 0                            | Uridine kinase (2)                                                                                    | kinase activity [GO:0016301 molecular_function] (2); metabolic process [GO:0008152 biological_process] (2); ATP binding [GO:0005524 molecular_function] (2); uridine kinase activity [GO:0004849 molecular_function] (1); nucleoside metabolic process [GO:0009116 biological_process] (1); UMP salvage [GO:0044206 biological_process] (1)                                                                                                                                                                                                                                                                                            | P-loop containing nucleoside triphosphate hydrolase [IPR027417] (2); Phosphoribulokinase/uridine kinase [IPR006083] (2); Uridine kinase-like [IPR007054] (2); Phosphoribosyltransferase-like [IPR029057] (2); Uridine kinase-like protein, plant [IPR029930] (1); Phosphoribosyltransferase domain [IPR000836] (1)           | scaffold_1_mRNA_2885.1           | C_unshiu_00081_mRNA_49.1    | -                               |
| GF0019852 | 1                             | 1                        | 0                            | Hypothetical protein (2)                                                                              | Hypothetical protein (2)                                                                                                                                                                                                                                                                                                                                                                                                                                                                                                                                                                                                               | Agmatine domain, plant type [IPR014002] (2); Agmatine-like domain [IPR008395] (2); Bromo adjacent homology (BAH) domain [IPR010252] (2); WLM domain [IPR013536] (2)                                                                                                                                                          | scaffold_1_mRNA_2808.1           | C_unshiu_00681_mRNA_12.1    | -                               |
| GF0019851 | 1                             | 1                        | 0                            | Bromo adjacent-like domain protein (2)                                                                | chromatin binding [GO:0003682 molecular_function] (2)                                                                                                                                                                                                                                                                                                                                                                                                                                                                                                                                                                                  | Agmatine domain, plant type [IPR014002] (2); Agmatine-like domain [IPR008395] (2); Bromo adjacent homology (BAH) domain [IPR010252] (2); WLM domain [IPR013536] (2)                                                                                                                                                          | scaffold_1_mRNA_2807.1           | C_unshiu_00681_mRNA_13.1    | -                               |
| GF0019850 | 1                             | 1                        | 0                            | Cytochrome P450 (2)                                                                                   | heme binding [GO:0020037 molecular_function] (2); iron ion binding [GO:0005506 molecular_function] (2); oxidation-reduction process [GO:0055114 biological_process] (2); oxidoreductase activity, acting on paired donors, with incorporation or reduction of molecular oxygen [GO:0016705 molecular_function] (2); iron ion binding [GO:0005506 molecular_function] (2); heme binding [GO:0020037 molecular_function] (2); oxidation-reduction process [GO:0055114 biological_process] (2); oxidoreductase activity, acting on paired donors, with incorporation or reduction of molecular oxygen [GO:0016705 molecular_function] (2) | Cytochrome P450 [IPR001128] (2)                                                                                                                                                                                                                                                                                              | scaffold_1_mRNA_2800.1           | C_unshiu_01231_mRNA_1.1     | -                               |
| GF0019849 | 1                             | 1                        | 0                            | Cytochrome P450 (2)                                                                                   | oxidation-reduction process [GO:0055114 biological_process] (2); oxidoreductase activity, acting on paired donors, with incorporation or reduction of molecular oxygen [GO:0016705 molecular_function] (2)                                                                                                                                                                                                                                                                                                                                                                                                                             | Cytochrome P450, E-class, group I [IPR002401] (2)                                                                                                                                                                                                                                                                            | scaffold_1_mRNA_2798.1           | C_unshiu_00681_mRNA_21.1    | -                               |
| GF0019848 | 1                             | 1                        | 0                            | Hypothetical protein (2)                                                                              | oxidoreductase activity, acting on paired donors, with incorporation or reduction of molecular oxygen [GO:0016705 molecular_function] (2); oxidation-reduction process [GO:0055114 biological_process] (2); heme binding [GO:0020037 molecular_function] (2); iron ion binding [GO:0005506 molecular_function] (2)                                                                                                                                                                                                                                                                                                                     | Cytochrome P450, E-class, group I [IPR002401] (2); Cytochrome P450, conserved site [IPR017972] (2); Cytochrome P450 [IPR001128] (2)                                                                                                                                                                                          | scaffold_1_mRNA_2796.1           | C_unshiu_00554_mRNA_18.1    | -                               |
| GF0019847 | 1                             | 1                        | 0                            | Cytochrome P450 (2)                                                                                   | oxidoreductase activity, acting on paired donors, with incorporation or reduction of molecular oxygen [GO:0016705 molecular_function] (2); oxidation-reduction process [GO:0055114 biological_process] (2); heme binding [GO:0020037 molecular_function] (2); iron ion binding [GO:0005506 molecular_function] (2)                                                                                                                                                                                                                                                                                                                     | Cytochrome P450, E-class, group I [IPR002401] (2); Cytochrome P450, conserved site [IPR017972] (2); Cytochrome P450 [IPR001128] (2)                                                                                                                                                                                          | scaffold_1_mRNA_2792.1           | C_unshiu_00554_mRNA_14.1    | -                               |
| GF0019845 | 1                             | 1                        | 0                            | Boron transporter-like protein (2)                                                                    | boron ion transport [GO:0006820 biological_process] (2); membrane [GO:0016020 cellular_component] (2); inorganic anion exchanger activity [GO:0005452 molecular_function] (2); integral component of membrane [GO:0016021 cellular_component] (2)                                                                                                                                                                                                                                                                                                                                                                                      | Bicarbonate transporter, eukaryotic [IPR003020] (2); Bicarbonate transporter, C-terminal [IPR011531] (2)                                                                                                                                                                                                                     | scaffold_1_mRNA_278.1            | C_unshiu_00553_mRNA_17.1    | -                               |
| GF0019843 | 1                             | 1                        | 0                            | Hypothetical protein (2)                                                                              | metal ion binding [GO:0046872 molecular_function] (2); metal ion transport [GO:0030001 biological_process] (2)                                                                                                                                                                                                                                                                                                                                                                                                                                                                                                                         | Heavy metal-associated domain, HMA [IPR006121] (2)                                                                                                                                                                                                                                                                           | scaffold_1_mRNA_2778.1           | C_unshiu_00554_mRNA_5.1     | -                               |
| GF0019842 | 1                             | 1                        | 0                            | Hypothetical protein (2)                                                                              | Hypothetical protein (2)                                                                                                                                                                                                                                                                                                                                                                                                                                                                                                                                                                                                               | dUTPase-like [IPR029054] (2); Deoxyuridine triphosphate nucleotidohydrolase [IPR008181] (1); dUTPase, trimeric [IPR033704] (1); Deoxyuridine triphosphate nucleotidohydrolase/Deoxyuridine triphosphate deaminase [IPR008180] (1)                                                                                            | scaffold_1_mRNA_2769.1           | C_unshiu_01429_mRNA_5.1     | -                               |
| GF0019840 | 1                             | 1                        | 0                            | Putative deoxyuridine 5'-triphosphate nucleotidohydrolase-like (1)                                    | Deoxyuridine 5'-triphosphate nucleotidohydrolase family protein (1); Putative deoxyuridine 5'-triphosphate nucleotidohydrolase-like (1)                                                                                                                                                                                                                                                                                                                                                                                                                                                                                                | dUTPase-like [IPR029054] (2); Deoxyuridine triphosphate nucleotidohydrolase [IPR008181] (1); dUTPase, trimeric [IPR033704] (1); Deoxyuridine triphosphate nucleotidohydrolase/Deoxyuridine triphosphate deaminase [IPR008180] (1)                                                                                            | scaffold_1_mRNA_2767.1           | C_unshiu_01429_mRNA_7.1     | -                               |
| GF0019839 | 1                             | 1                        | 0                            | V-type proton ATPase subunit e (2)                                                                    | proton-transporting V-type ATPase, V0 domain [GO:0033379 cellular_component] (2); hydrogen ion transmembrane transporter activity [GO:0015078 molecular_function] (2); ATP hydrolysis coupled proton transport [GO:0015991 biological_process] (2)                                                                                                                                                                                                                                                                                                                                                                                     | ATPase, V0 complex, subunit e/e2 [IPR008389] (2)                                                                                                                                                                                                                                                                             | scaffold_1_mRNA_2739.1           | C_unshiu_00103_mRNA_58.1    | -                               |

| ID        | Num. in <i>C. clementinae</i> | Num. in <i>C. acutis</i> | Num. in <i>P. trifoliata</i> | Note                                                                                                      | GO                                                                                                                                                                                                                                                                                                                                                                             | InterPro                                                                                                                                                                                                                                                                                                                                                                                                    | Members in <i>C. clementinae</i> | Members in <i>C. acutis</i> | Members in <i>P. trifoliata</i> |
|-----------|-------------------------------|--------------------------|------------------------------|-----------------------------------------------------------------------------------------------------------|--------------------------------------------------------------------------------------------------------------------------------------------------------------------------------------------------------------------------------------------------------------------------------------------------------------------------------------------------------------------------------|-------------------------------------------------------------------------------------------------------------------------------------------------------------------------------------------------------------------------------------------------------------------------------------------------------------------------------------------------------------------------------------------------------------|----------------------------------|-----------------------------|---------------------------------|
| GF0019838 | 1                             | 1                        | 0                            | Transcription initiation factor TFIIID subunit 6 (2)                                                      | protein heterodimerization activity [GO:0046962 molecular_function] (2); nucleus [GO:0005634 cellular_component] (2); binding [GO:0005488 molecular_function] (2); regulation of sequence-specific DNA binding transcription factor activity [GO:0051090 biological_process] (2); DNA-templated transcription, initiation [GO:0006352 biological_process] (2)                  | Armadillo-type fold [IPRO16024] (2); TAF <sub>II</sub> C-terminal HEAT repeat domain [IPRO11442] (2); TAF <sub>II</sub> box binding protein associated factor (TAF) [IPRO04833] (2); Armadillo-like helical [IPRO11909] (2); Histone-fold [IPRO09072] (2)                                                                                                                                                   | scaffold_1_mRNA_237.1            | C_usnhii_00103_mRNA_56.1    | -                               |
| GF0019836 | 1                             | 1                        | 0                            | Hypothetical protein (2)                                                                                  | protein binding [GO:0005515 molecular_function] (1)                                                                                                                                                                                                                                                                                                                            | F-box domain [IPRO01810] (1); Leucine-rich repeat domain, L domain-like [IPRO32675] (1)                                                                                                                                                                                                                                                                                                                     | scaffold_1_mRNA_2710.1           | C_usnhii_00103_mRNA_26.1    | -                               |
| GF0019834 | 1                             | 1                        | 0                            | Hypothetical protein (2)                                                                                  | regulation of transcription, DNA-templated [GO:0006355 biological_process] (1)                                                                                                                                                                                                                                                                                                 | FHY3/FAR1 family [IPRO31052] (1)                                                                                                                                                                                                                                                                                                                                                                            | scaffold_1_mRNA_2690.1           | C_usnhii_02382_mRNA_5.1     | -                               |
| GF0019831 | 1                             | 1                        | 0                            | Calcium-dependent protein kinase 21 (2)                                                                   | ATP binding [GO:0005524 molecular_function] (2); protein phosphorylation [GO:0006468 biological_process] (2); protein kinase activity [GO:0004672 molecular_function] (2); calcium ion binding [GO:0005509 molecular_function] (1)                                                                                                                                             | Serine/threonine-protein kinase, active site [IPRO08271] (2); Protein kinase domain [IPRO00719] (2); Protein kinase-like domain [IPRO11009] (2); Protein kinase, ATP binding site [IPRO17441] (1); EF-hand domain [IPRO02088] (1); Serine/threonine/dual specificity protein kinase, catalytic domain [IPRO02290] (1); EF-Hand 1, calcium-binding site [IPRO18247] (1); EF-hand domain pair [IPRO11992] (1) | scaffold_1_mRNA_2654.1           | C_usnhii_00062_mRNA_1.1     | -                               |
| GF0019830 | 1                             | 1                        | 0                            | Calcium-dependent protein kinase 21 (1); Calcium-dependent protein kinase 29 (1)                          | protein kinase activity [GO:0004672 molecular_function] (2); protein phosphorylation [GO:0006468 biological_process] (2); ATP binding [GO:0005524 molecular_function] (2); calcium ion binding [GO:0005509 molecular_function] (1)                                                                                                                                             | Protein kinase-like domain [IPRO11009] (2); Protein kinase domain [IPRO00719] (2); EF-hand domain pair [IPRO11992] (1); EF-Hand 1, calcium-binding site [IPRO18247] (1); EF-hand domain [IPRO02088] (1); Serine/threonine/dual specificity protein kinase, catalytic domain [IPRO02290] (1); Protein kinase, ATP binding site [IPRO17441] (1)                                                               | scaffold_1_mRNA_2649.1           | C_usnhii_02583_mRNA_1.1     | -                               |
| GF0019828 | 1                             | 1                        | 0                            | Ankyrin repeat family protein, putative (2)                                                               | protein binding [GO:0005515 molecular_function] (2); protein phosphorylation [GO:0006468 biological_process] (2); protein kinase activity [GO:0004672 molecular_function] (2); ATP binding [GO:0005524 molecular_function] (2)                                                                                                                                                 | Protein kinase domain [IPRO00719] (2); Ankyrin repeat [IPRO02102] (2); Protein kinase-like domain [IPRO11009] (2); Serine/threonine-protein kinase, active site [IPRO08271] (2); Protein kinase, ATP binding site [IPRO17441] (2); PGG domain [IPRO26961] (2); Ankyrin repeat-containing domain [IPRO020683] (2); Serine/threonine/dual specificity protein kinase, catalytic domain [IPRO02290] (1)        | scaffold_1_mRNA_2635.1           | C_usnhii_00277_mRNA_8.1     | -                               |
| GF0019827 | 1                             | 1                        | 0                            | Hypothetical protein (1); Calmodulin-domain protein kinase 9 isoform 3 (1)                                | calcium ion binding [GO:0005509 molecular_function] (2); ATP binding [GO:0005524 molecular_function] (1); protein kinase activity [GO:0004672 molecular_function] (1); protein phosphorylation [GO:0006468 biological_process] (1)                                                                                                                                             | EF-Hand 1, calcium-binding site [IPRO18247] (2); EF-hand domain [IPRO02088] (2); EF-hand domain pair [IPRO11992] (2); Serine/threonine-protein kinase, active site [IPRO08271] (1); Serine/threonine/dual specificity protein kinase, catalytic domain [IPRO02290] (1); Protein kinase-like domain [IPRO11009] (1); Protein kinase domain [IPRO00719] (1)                                                   | scaffold_1_mRNA_2631.1           | C_usnhii_00277_mRNA_12.1    | -                               |
| GF0019826 | 1                             | 1                        | 0                            | RING-U-box superfamily protein, putative isoform 1 (1); RING-H2 finger protein ATL1Q (1)                  | protein binding [GO:0005515 molecular_function] (2); zinc ion binding [GO:0008270 molecular_function] (2)                                                                                                                                                                                                                                                                      | Zinc finger, RING-type [IPRO01841] (2); Zinc finger, RINGFYVE/PHD-type [IPRO13083] (2); RdaA family [IPRO06056] (1); YjgF/YER057c/UK114 family [IPRO111] (1); RdaA, conserved site [IPRO19897] (1); Endoribonuclease L-PSF/chorismate mutase-like [IPRO13813] (1)                                                                                                                                           | scaffold_1_mRNA_2627.1           | C_usnhii_01352_mRNA_1.1     | -                               |
| GF0019824 | 1                             | 1                        | 0                            | Polysialyltransferase protein RBP47C (1); Hypothetical protein (1)                                        | nucleic acid binding [GO:0003676 molecular_function] (2); nucleoside binding [GO:0000166 molecular_function] (1); ADP binding [GO:0043531 molecular_function] (1)                                                                                                                                                                                                              | RNA recognition motif domain [IPRO00594] (2); P-loop containing nucleoside triphosphate hydrolase [IPRO27471] (1); Nucleotide-binding alpha-beta domain [IPRO12677] (1); NB-ARC [IPRO02182] (1)                                                                                                                                                                                                             | scaffold_1_mRNA_2611.1           | C_usnhii_00998_mRNA_7.1     | -                               |
| GF0019823 | 1                             | 1                        | 0                            | Hypothetical protein (2)                                                                                  | threonine-type endopeptidase activity [GO:0004298 molecular_function] (2); endopeptidase activity [GO:0004175 molecular_function] (2); proteasome core complex [GO:0005839 cellular_component] (2); proteolysis involved in cellular protein catabolic process [GO:0051603 biological_process] (2)                                                                             | Proteasome beta-type subunit, conserved site [IPRO16050] (2); Proteasome B-type subunit [IPRO23333] (2); Peptidase T1A, proteasome beta-subunit [IPRO00243] (2); Nucleophilic aminohydroxylase, N-terminal [IPRO29055] (2); Proteasome, subunit alpha/beta [IPRO01353] (2)                                                                                                                                  | scaffold_1_mRNA_260.1            | C_usnhii_00553_mRNA_4.1     | -                               |
| GF0019822 | 1                             | 1                        | 0                            | Proteasome subunit beta type (2)                                                                          | oxidoreductase activity, acting on paired donors, with incorporation or reduction of molecular oxygen [GO:0016705 molecular_function] (2); oxidation-reduction process [GO:0055114 biological_process] (2); iron ion binding [GO:0005506 molecular_function] (2); heme binding [GO:0020037 molecular_function] (2); monooxygenase activity [GO:0004497 molecular_function] (1) | Cytochrome P450, B-class [IPRO02397] (2); Cytochrome P450, conserved site [IPRO17972] (2); Cytochrome P450 [IPRO01128] (2)                                                                                                                                                                                                                                                                                  | scaffold_1_mRNA_2595.1           | C_usnhii_00555_mRNA_9.1     | -                               |
| GF0019820 | 1                             | 1                        | 0                            | Aminotransferase-like, plant mobile domain family protein (1); C globular stage, putative (1)             | Aminotransferase-like, plant mobile domain [IPRO19557] (2); Protein of unknown function DUF716 (TMEM445) [IPRO06904] (2)                                                                                                                                                                                                                                                       | Aminotransferase-like, plant mobile domain [IPRO19557] (2); Protein of unknown function DUF716 (TMEM445) [IPRO06904] (2)                                                                                                                                                                                                                                                                                    | scaffold_1_mRNA_2584.1           | C_usnhii_00017_mRNA_22.1    | -                               |
| GF0019819 | 1                             | 1                        | 0                            | Hypothetical protein (2)                                                                                  | Leucine-rich repeat domain, L domain-like [IPRO32675] (1)                                                                                                                                                                                                                                                                                                                      | Leucine-rich repeat domain, L domain-like [IPRO32675] (1)                                                                                                                                                                                                                                                                                                                                                   | scaffold_1_mRNA_2578.1           | C_usnhii_00017_mRNA_30.1    | -                               |
| GF0019818 | 1                             | 1                        | 0                            | F-box, LRR-repeat protein At3g58900 (1); Hypothetical protein (1)                                         | protein binding [GO:0005515 molecular_function] (1)                                                                                                                                                                                                                                                                                                                            | Leucine-rich repeat domain, L domain-like [IPRO32675] (2); F-box domain [IPRO01810] (1)                                                                                                                                                                                                                                                                                                                     | scaffold_1_mRNA_2577.1           | C_usnhii_00017_mRNA_31.1    | -                               |
| GF0019817 | 1                             | 1                        | 0                            | LRR receptor-like kinase family protein 0 (1); LRR receptor-like serine/threonine-protein kinase GSO1 (1) | protein binding [GO:0005515 molecular_function] (2)                                                                                                                                                                                                                                                                                                                            | Leucine-rich repeat-containing N-terminal, plant-type [IPRO13210] (2); Leucine-rich repeat [IPRO01611] (2); Leucine-rich repeat, typical subtype [IPRO03591] (2); Leucine-rich repeat domain, L domain-like [IPRO32675] (2)                                                                                                                                                                                 | scaffold_1_mRNA_2573.1           | C_usnhii_02856_mRNA_2.1     | -                               |
| GF0019815 | 1                             | 1                        | 0                            | Hypothetical protein (2)                                                                                  | regulation of transcription, DNA-templated [GO:0006355 biological_process] (2); zinc ion binding [GO:0008270 molecular_function] (2)                                                                                                                                                                                                                                           | FAR1 DNA binding domain [IPRO04330] (2); FHY3/FAR1 family [IPRO31052] (2); Zinc finger, SWIM-like [IPRO07527] (2); MULE transposase domain [IPRO18289] (2)                                                                                                                                                                                                                                                  | scaffold_1_mRNA_2571.1           | C_usnhii_02856_mRNA_3.1     | -                               |
| GF0019814 | 1                             | 1                        | 0                            | Protein FAR1-RELATED SEQUENCE 5 (2)                                                                       | regulation of transcription, DNA-templated [GO:0006355 biological_process] (2); zinc ion binding [GO:0008270 molecular_function] (2)                                                                                                                                                                                                                                           | Aminotransferase-like, plant mobile domain [IPRO19557] (2); Protein of unknown function DUF716 (TMEM445) [IPRO06904] (2)                                                                                                                                                                                                                                                                                    | scaffold_1_mRNA_2566.1           | C_usnhii_01265_mRNA_7.1     | -                               |
| GF0019813 | 1                             | 1                        | 0                            | Hypothetical protein (2)                                                                                  | regulation of transcription, DNA-templated [GO:0006355 biological_process] (2); zinc ion binding [GO:0008270 molecular_function] (2)                                                                                                                                                                                                                                           | Leucine-rich repeat 2 [IPRO13101] (2); F-box domain [IPRO01810] (2); Leucine-rich repeat domain, L domain-like [IPRO32675] (2); FBD domain [IPRO06566] (1)                                                                                                                                                                                                                                                  | scaffold_1_mRNA_2562.1           | C_usnhii_01265_mRNA_2.1     | -                               |
| GF0019812 | 1                             | 1                        | 0                            | Hypothetical protein (2)                                                                                  | regulation of transcription, DNA-templated [GO:0006355 biological_process] (2); zinc ion binding [GO:0008270 molecular_function] (2)                                                                                                                                                                                                                                           | Aminotransferase-like, plant mobile domain [IPRO19557] (2); Protein of unknown function DUF716 (TMEM445) [IPRO06904] (2)                                                                                                                                                                                                                                                                                    | scaffold_1_mRNA_2558.1           | C_usnhii_03061_mRNA_1.1     | -                               |
| GF0019811 | 1                             | 1                        | 0                            | FBD, F-box and leucine rich repeat domain-containing protein (2)                                          | protein binding [GO:0005515 molecular_function] (2)                                                                                                                                                                                                                                                                                                                            | Leucine-rich repeat 2 [IPRO13101] (2); F-box domain [IPRO01810] (2); Leucine-rich repeat domain, L domain-like [IPRO32675] (2); FBD domain [IPRO06566] (1)                                                                                                                                                                                                                                                  | scaffold_1_mRNA_2554.1           | C_usnhii_02130_mRNA_1.1     | -                               |
| GF0019810 | 1                             | 1                        | 0                            | Hypothetical protein (2)                                                                                  | protein phosphorylation [GO:0006468 biological_process] (2); protein kinase activity [GO:0004672 molecular_function] (2); ATP binding [GO:0005524 molecular_function] (2)                                                                                                                                                                                                      | Serine/threonine-protein kinase, active site [IPRO08271] (2); Protein kinase, ATP binding site [IPRO17441] (2); Protein kinase-like domain [IPRO11009] (2); Protein kinase domain [IPRO00719] (2); Conserved alpha-beta lectin/galactanase domain [IPRO13320] (1)                                                                                                                                           | scaffold_1_mRNA_2551.1           | C_usnhii_00036_mRNA_51.1    | -                               |
| GF0019809 | 1                             | 1                        | 0                            | Serine/threonine-protein kinase PHS1 (2)                                                                  | protein phosphorylation [GO:0006468 biological_process] (2); protein kinase activity [GO:0004672 molecular_function] (2); ATP binding [GO:0005524 molecular_function] (2)                                                                                                                                                                                                      | Protein of unknown function DUF4666 [IPRO31421] (2)                                                                                                                                                                                                                                                                                                                                                         | scaffold_1_mRNA_2551.1           | C_usnhii_00749_mRNA_12.1    | -                               |
| GF0019808 | 1                             | 1                        | 0                            | Hypothetical protein (2)                                                                                  | regulation of transcription, DNA-templated [GO:0006355 biological_process] (2); zinc ion binding [GO:0008270 molecular_function] (2)                                                                                                                                                                                                                                           | Protein of unknown function DUF4666 [IPRO31421] (2)                                                                                                                                                                                                                                                                                                                                                         | scaffold_1_mRNA_2547.1           | C_usnhii_00576_mRNA_15.1    | -                               |
| GF0019807 | 1                             | 1                        | 0                            | Hypothetical protein (2)                                                                                  | Serine/threonine-protein phosphatase 6 regulatory ankyrin repeat subunit A (1); Ankyrin repeat family protein, putative (1)                                                                                                                                                                                                                                                    | Ankyrin repeat-containing domain [IPRO020683] (2); Ankyrin repeat [IPRO02110] (1)                                                                                                                                                                                                                                                                                                                           | scaffold_1_mRNA_2541.1           | C_usnhii_02076_mRNA_3.1     | -                               |
| GF0019806 | 1                             | 1                        | 0                            | regulatory ankyrin repeat subunit A (1); Ankyrin repeat family protein, putative (1)                      | protein binding [GO:0005515 molecular_function] (2)                                                                                                                                                                                                                                                                                                                            | PGG domain [IPRO26961] (2); Ankyrin repeat-containing domain [IPRO020683] (2); Ankyrin repeat [IPRO02110] (1)                                                                                                                                                                                                                                                                                               | scaffold_1_mRNA_2540.1           | C_usnhii_02122_mRNA_1.1     | -                               |
| GF0019805 | 1                             | 1                        | 0                            | Ankyrin repeat protein (2)                                                                                | protein binding [GO:0005515 molecular_function] (1)                                                                                                                                                                                                                                                                                                                            | Protein of unknown function DUF4666 [IPRO31421] (2)                                                                                                                                                                                                                                                                                                                                                         | scaffold_1_mRNA_254.1            | C_usnhii_00749_mRNA_11.1    | -                               |
| GF0019804 | 1                             | 1                        | 0                            | Hypothetical protein (2)                                                                                  | regulation of transcription, DNA-templated [GO:0006355 biological_process] (1); gamma-glutamylcystyltransferase activity [GO:0003839 molecular_function] (1)                                                                                                                                                                                                                   | Gamma-glutamylcystyltransferase-like [IPRO13024] (1); Glutathione-specific gamma-glutamylcystyltransferase [IPRO06840] (1); ClacC-like protein [IPRO06840] (1); Botomium biosynthesis, BFG-like [IPRO13024] (1)                                                                                                                                                                                             | scaffold_1_mRNA_2519.1           | C_usnhii_00142_mRNA_8.1     | -                               |
| GF0019803 | 1                             | 1                        | 0                            | Hypothetical protein (2)                                                                                  | glutathione catabolic process [GO:0006751 biological_process] (1); gamma-glutamylcystyltransferase activity [GO:0003839 molecular_function] (1)                                                                                                                                                                                                                                | Gamma-glutamylcystyltransferase-like [IPRO13024] (1); Glutathione-specific gamma-glutamylcystyltransferase [IPRO06840] (1); ClacC-like protein [IPRO06840] (1); Botomium biosynthesis, BFG-like [IPRO13024] (1)                                                                                                                                                                                             | scaffold_1_mRNA_2519.1           | C_usnhii_00157_mRNA_2.1     | -                               |
| GF0019801 | 1                             | 1                        | 0                            | Hypothetical protein (2)                                                                                  | glutathione catabolic process [GO:0006751 biological_process] (1); gamma-glutamylcystyltransferase activity [GO:0003839 molecular_function] (1)                                                                                                                                                                                                                                | Gamma-glutamylcystyltransferase-like [IPRO13024] (1); Glutathione-specific gamma-glutamylcystyltransferase [IPRO06840] (1); ClacC-like protein [IPRO06840] (1); Botomium biosynthesis, BFG-like [IPRO13024] (1)                                                                                                                                                                                             | scaffold_1_mRNA_2500.1           | C_usnhii_00157_mRNA_2.1     | -                               |
| GF0019800 | 1                             | 1                        | 0                            | Cation transport protein chac2 (2)                                                                        | glutathione catabolic process [GO:0006751 biological_process] (1); gamma-glutamylcystyltransferase activity [GO:0003839 molecular_function] (1)                                                                                                                                                                                                                                | Gamma-glutamylcystyltransferase-like [IPRO13024] (1); Glutathione-specific gamma-glutamylcystyltransferase [IPRO06840] (1); ClacC-like protein [IPRO06840] (1); Botomium biosynthesis, BFG-like [IPRO13024] (1)                                                                                                                                                                                             | scaffold_1_mRNA_250.1            | C_usnhii_00003_mRNA_137.2   | -                               |
| GF0019799 | 1                             | 1                        | 0                            | Hypothetical protein (2)                                                                                  | glutathione catabolic process [GO:0006751 biological_process] (1); gamma-glutamylcystyltransferase activity [GO:0003839 molecular_function] (1)                                                                                                                                                                                                                                | Gamma-glutamylcystyltransferase-like [IPRO13024] (1); Glutathione-specific gamma-glutamylcystyltransferase [IPRO06840] (1); ClacC-like protein [IPRO06840] (1); Botomium biosynthesis, BFG-like [IPRO13024] (1)                                                                                                                                                                                             | scaffold_1_mRNA_2499.1           | C_usnhii_00157_mRNA_7.1     | -                               |

| ID        | Num. in <i>C. clementinae</i> | Num. in <i>C. acutula</i> | Num. in <i>P. trifoliata</i> | Note                                                                                 | GO                                                                                                                                                                                                                                                                                                                                                                                         | InterPro                                                                                                                                                                                                                                                                                                                                                                                                                                                                                                                                                   | Members in <i>C. clementinae</i> | Members in <i>C. acutula</i> | Members in <i>P. trifoliata</i> |
|-----------|-------------------------------|---------------------------|------------------------------|--------------------------------------------------------------------------------------|--------------------------------------------------------------------------------------------------------------------------------------------------------------------------------------------------------------------------------------------------------------------------------------------------------------------------------------------------------------------------------------------|------------------------------------------------------------------------------------------------------------------------------------------------------------------------------------------------------------------------------------------------------------------------------------------------------------------------------------------------------------------------------------------------------------------------------------------------------------------------------------------------------------------------------------------------------------|----------------------------------|------------------------------|---------------------------------|
| GF0019798 | 1                             | 1                         | 0                            | E3 ubiquitin-protein ligase RBBP6 (1); Hypothetical protein (1)                      | nucleic acid binding [GO:0003676 molecular_function] (1); zinc ion binding [GO:0008270 molecular_function] (1)                                                                                                                                                                                                                                                                             | Zinc finger, CCHC-type [IPRO018178] (1); Retrotransposon gag domain [IPRO05162] (1)                                                                                                                                                                                                                                                                                                                                                                                                                                                                        | scaffold_1_mRNA_2498.1           | C_unshiu_01450_mRNA_1.1      | -                               |
| GF0019797 | 1                             | 1                         | 0                            | Disease resistance family protein / LRR family protein, putative (2)                 | protein binding [GO:0005515 molecular_function] (2)                                                                                                                                                                                                                                                                                                                                        | Leucine-rich repeat [IPRO01611] (2); Leucine-rich repeat domain, L domain-like [IPRO32975] (2)                                                                                                                                                                                                                                                                                                                                                                                                                                                             | scaffold_1_mRNA_2494.1           | C_unshiu_00487_mRNA_23.1     | -                               |
| GF0019796 | 1                             | 1                         | 0                            | Disease resistance family protein / LRR family protein, putative (2)                 | protein binding [GO:0005515 molecular_function] (2)                                                                                                                                                                                                                                                                                                                                        | Leucine-rich repeat, typical subtype [IPRO03591] (2); Leucine-rich repeat domain, L domain-like [IPRO32675] (2); Leucine-rich repeat [IPRO01611] (2); Leucine-rich repeat-containing N-terminal, plant-type [IPRO13210] (2)                                                                                                                                                                                                                                                                                                                                | scaffold_1_mRNA_2492.1           | C_unshiu_00487_mRNA_21.1     | -                               |
| GF0019795 | 1                             | 1                         | 0                            | Hypothetical protein (2)                                                             |                                                                                                                                                                                                                                                                                                                                                                                            |                                                                                                                                                                                                                                                                                                                                                                                                                                                                                                                                                            | scaffold_1_mRNA_2490.1           | C_unshiu_00487_mRNA_19.1     | -                               |
| GF0019793 | 1                             | 1                         | 0                            | Lambda class glutathione S-transferase (1); Glutathione S-transferase L3 (1)         | protein binding [GO:0005515 molecular_function] (1)                                                                                                                                                                                                                                                                                                                                        | Glutathione S-transferase, C-terminal-like [IPRO10987] (2); Ubiquitin domain [IPRO00626] (1); Ubiquitin-related domain [IPRO29071] (1); Ubiquitin [IPRO19956] (1)                                                                                                                                                                                                                                                                                                                                                                                          | scaffold_1_mRNA_2473.1           | C_unshiu_00395_mRNA_15.1     | -                               |
| GF0019792 | 1                             | 1                         | 0                            | Non-race specific disease resistance 1 (2)                                           | transport [GO:0006810 biological_process] (2); integral component of membrane [GO:0016021 cellular_component] (2); ATPase activity [GO:0016887 molecular_function] (2); ATP binding [GO:0005524 molecular_function] (2); transmembrane transport [GO:0055085 biological_process] (2); ATPase activity, coupled to transmembrane movement of substances [GO:0042626 molecular_function] (2) | ABC transporter, conserved site [IPRO17871] (2); P-loop containing nucleoside triphosphate hydrolase [IPRO27471] (2); AAA+ ATPase domain [IPRO03933] (2); ABC transporter-like [IPRO04349] (2); ABC transporter type 1, transmembrane domain [IPRO11527] (2)                                                                                                                                                                                                                                                                                               | scaffold_1_mRNA_2471.1           | C_unshiu_00395_mRNA_13.1     | -                               |
| GF0019791 | 1                             | 1                         | 0                            | ABC transporter B family member 15 (2)                                               | drug transmembrane transporter activity [GO:0015238 molecular_function] (2); antiporter activity [GO:0015297 molecular_function] (2); membrane [GO:0016020 cellular_component] (2); drug transmembrane transport [GO:0006555 biological_process] (2); transmembrane transport [GO:0055085 biological_process] (2)                                                                          | Multi antimicrobial extrusion protein [IPRO25238] (2)                                                                                                                                                                                                                                                                                                                                                                                                                                                                                                      | scaffold_1_mRNA_2464.1           | C_unshiu_00395_mRNA_12.1     | -                               |
| GF0019790 | 1                             | 1                         | 0                            | Hypothetical protein (2)                                                             |                                                                                                                                                                                                                                                                                                                                                                                            |                                                                                                                                                                                                                                                                                                                                                                                                                                                                                                                                                            | scaffold_1_mRNA_2464.1           | C_unshiu_00395_mRNA_6.1      | -                               |
| GF0019788 | 1                             | 1                         | 0                            | Hypothetical protein (2)                                                             |                                                                                                                                                                                                                                                                                                                                                                                            |                                                                                                                                                                                                                                                                                                                                                                                                                                                                                                                                                            | scaffold_1_mRNA_2447.1           | C_unshiu_00626_mRNA_13.1     | -                               |
| GF0019786 | 1                             | 1                         | 0                            | Terpenoid synthase (1); Delta-cadinene synthase isozyme A (1)                        | lyase activity [GO:0016829 molecular_function] (2); terpene synthase activity [GO:0010333 molecular_function] (2); magnesium ion binding [GO:0000287 molecular_function] (2)                                                                                                                                                                                                               | Isoprenoid synthase domain [IPRO08949] (2); Terpene synthase, metal-binding domain [IPRO05630] (2)                                                                                                                                                                                                                                                                                                                                                                                                                                                         | scaffold_1_mRNA_2439.1           | C_unshiu_01516_mRNA_1.1      | -                               |
| GF0019785 | 1                             | 1                         | 0                            | Hypothetical protein (2)                                                             |                                                                                                                                                                                                                                                                                                                                                                                            |                                                                                                                                                                                                                                                                                                                                                                                                                                                                                                                                                            | scaffold_1_mRNA_2436.1           | C_unshiu_01516_mRNA_6.1      | -                               |
| GF0019784 | 1                             | 1                         | 0                            | Delta-cadinene synthase isozyme XC14 (1); (+)-delta-cadinene synthase isozyme A (1)  | lyase activity [GO:0016829 molecular_function] (2); terpene synthase activity [GO:0010333 molecular_function] (2); metabolic process [GO:0008152 biological_process] (2)                                                                                                                                                                                                                   | Terpenoid cyclase/protein prenyltransferase alpha-alpha toroid [IPRO08930] (2); Terpene synthase, N-terminal domain [IPRO01906] (2)                                                                                                                                                                                                                                                                                                                                                                                                                        | scaffold_1_mRNA_2419.1           | C_unshiu_01090_mRNA_5.1      | -                               |
| GF0019781 | 1                             | 1                         | 0                            | Sesquiterpene synthase (2)                                                           | magnesium ion binding [GO:0000287 molecular_function] (2); terpene synthase activity [GO:0010333 molecular_function] (2); lyase activity [GO:0016829 molecular_function] (2); metabolic process [GO:0008152 biological_process] (2)                                                                                                                                                        | Terpenoid cyclase/protein prenyltransferase alpha-alpha toroid [IPRO08930] (2); Terpene synthase, N-terminal domain [IPRO05630] (2); Isoprenoid synthase domain [IPRO08949] (2)                                                                                                                                                                                                                                                                                                                                                                            | scaffold_1_mRNA_2409.1           | C_unshiu_01090_mRNA_13.1     | -                               |
| GF0019780 | 1                             | 1                         | 0                            | Hypothetical protein (2)                                                             | DNA binding [GO:0000377 molecular_function] (1)                                                                                                                                                                                                                                                                                                                                            | Mtj-like domain [IPRO17877] (2); Homeodomain-like [IPRO09057] (1)                                                                                                                                                                                                                                                                                                                                                                                                                                                                                          | scaffold_1_mRNA_241.1            | C_unshiu_00003_mRNA_136.1    | -                               |
| GF0019779 | 1                             | 1                         | 0                            | Hypothetical protein (2)                                                             | metabolic process [GO:0008152 biological_process] (2); terpene synthase activity [GO:0010333 molecular_function] (2); lyase activity [GO:0016829 molecular_function] (2); magnesium ion binding [GO:0000287 molecular_function] (2)                                                                                                                                                        | Isoprenoid synthase domain [IPRO08949] (2); Terpene synthase, metal-binding domain [IPRO05630] (2); Terpene synthase, N-terminal domain [IPRO01906] (2)                                                                                                                                                                                                                                                                                                                                                                                                    | scaffold_1_mRNA_2396.1           | C_unshiu_00743_mRNA_10.1     | -                               |
| GF0019778 | 1                             | 1                         | 0                            | Sesquiterpene synthase (2)                                                           | lyase activity [GO:0016829 molecular_function] (2); terpene synthase activity [GO:0010333 molecular_function] (2); magnesium ion binding [GO:0000287 molecular_function] (2)                                                                                                                                                                                                               | Terpenoid cyclase/protein prenyltransferase alpha-alpha toroid [IPRO08930] (2)                                                                                                                                                                                                                                                                                                                                                                                                                                                                             | scaffold_1_mRNA_2395.1           | C_unshiu_00743_mRNA_11.1     | -                               |
| GF0019777 | 1                             | 1                         | 0                            | Hypothetical protein (2)                                                             |                                                                                                                                                                                                                                                                                                                                                                                            |                                                                                                                                                                                                                                                                                                                                                                                                                                                                                                                                                            | scaffold_1_mRNA_2393.1           | C_unshiu_01083_mRNA_6.1      | -                               |
| GF0019776 | 1                             | 1                         | 0                            | Hypothetical protein (2)                                                             |                                                                                                                                                                                                                                                                                                                                                                                            |                                                                                                                                                                                                                                                                                                                                                                                                                                                                                                                                                            | scaffold_1_mRNA_2392.1           | C_unshiu_01083_mRNA_5.1      | -                               |
| GF0019775 | 1                             | 1                         | 0                            | Hypothetical protein (2)                                                             | proteolysis [GO:0006508 biological_process] (1); cysteine-type peptidase activity [GO:0008234 molecular_function] (1)                                                                                                                                                                                                                                                                      | Ulp1 protease family, C-terminal catalytic domain [IPRO03653] (1)                                                                                                                                                                                                                                                                                                                                                                                                                                                                                          | scaffold_1_mRNA_2389.1           | C_unshiu_02083_mRNA_4.1      | -                               |
| GF0019774 | 1                             | 1                         | 0                            | Hypothetical protein (2)                                                             | nucleic acid binding [GO:0003676 molecular_function] (1)                                                                                                                                                                                                                                                                                                                                   | Endonuclease/exonuclease/phosphatase [IPRO05135] (2); Ribonuclease H-like domain [IPRO12337] (1)                                                                                                                                                                                                                                                                                                                                                                                                                                                           | scaffold_1_mRNA_2381.1           | C_unshiu_00174_mRNA_5.1      | -                               |
| GF0019772 | 1                             | 1                         | 0                            | Hypothetical protein (1); FARI DNA-binding domain protein (1)                        | zinc ion binding [GO:0008270 molecular_function] (2); regulation of transcription, DNA-templated [GO:0006355 biological_process] (2)                                                                                                                                                                                                                                                       | Zinc finger, SWIM-type [IPRO07527] (2); FYF3/FAR1 family [IPRO31052] (2); FARI DNA binding domain [IPRO04330] (1)                                                                                                                                                                                                                                                                                                                                                                                                                                          | scaffold_1_mRNA_2371.1           | C_unshiu_00126_mRNA_17.1     | -                               |
| GF0019771 | 1                             | 1                         | 0                            | Hypothetical protein (2)                                                             |                                                                                                                                                                                                                                                                                                                                                                                            |                                                                                                                                                                                                                                                                                                                                                                                                                                                                                                                                                            | scaffold_1_mRNA_2358.1           | C_unshiu_01256_mRNA_1.1      | -                               |
| GF0019770 | 1                             | 1                         | 0                            | Hypothetical protein (2)                                                             |                                                                                                                                                                                                                                                                                                                                                                                            |                                                                                                                                                                                                                                                                                                                                                                                                                                                                                                                                                            | scaffold_1_mRNA_2353.1           | C_unshiu_02834_mRNA_2.1      | -                               |
| GF0019769 | 1                             | 1                         | 0                            | Monosaccharide transport protein (2)                                                 |                                                                                                                                                                                                                                                                                                                                                                                            |                                                                                                                                                                                                                                                                                                                                                                                                                                                                                                                                                            | scaffold_1_mRNA_2351.1           | C_unshiu_02834_mRNA_5.1      | -                               |
| GF0019768 | 1                             | 1                         | 0                            | Hypothetical protein (2)                                                             |                                                                                                                                                                                                                                                                                                                                                                                            |                                                                                                                                                                                                                                                                                                                                                                                                                                                                                                                                                            | scaffold_1_mRNA_2350.1           | C_unshiu_02834_mRNA_6.1      | -                               |
| GF0019767 | 1                             | 1                         | 0                            | Hypothetical protein (2)                                                             | ATP binding [GO:0005524 molecular_function] (2); protein kinase activity [GO:0004672 molecular_function] (2); protein phosphorylation [GO:0006468 biological_process] (2)                                                                                                                                                                                                                  | Protein kinase-like domain [IPRO11009] (2); Protein kinase domain [IPRO00719] (2); Serine/threonine/tyrosine-protein kinase catalytic domain [IPRO01245] (1); Serine/threonine/tyrosine-protein kinase, catalytic domain [IPRO01245] (1); Serine/threonine-protein kinase, active site [IPRO08271] (1)                                                                                                                                                                                                                                                     | scaffold_1_mRNA_2345.1           | C_unshiu_00462_mRNA_17.1     | -                               |
| GF0019766 | 1                             | 1                         | 0                            | Hypothetical protein (2)                                                             |                                                                                                                                                                                                                                                                                                                                                                                            |                                                                                                                                                                                                                                                                                                                                                                                                                                                                                                                                                            | scaffold_1_mRNA_2344.1           | C_unshiu_00462_mRNA_16.1     | -                               |
| GF0019765 | 1                             | 1                         | 0                            | Hypothetical protein (2)                                                             |                                                                                                                                                                                                                                                                                                                                                                                            |                                                                                                                                                                                                                                                                                                                                                                                                                                                                                                                                                            | scaffold_1_mRNA_2343.1           | C_unshiu_00462_mRNA_15.1     | -                               |
| GF0019764 | 1                             | 1                         | 0                            | Cysteine-rich RLK (Receptor-like kinase) protein (2)                                 | ATP binding [GO:0005524 molecular_function] (2); protein phosphorylation [GO:0006468 biological_process] (2); protein kinase activity [GO:0004672 molecular_function] (2)                                                                                                                                                                                                                  | S-locus receptor kinase, C-terminal [IPRO21820] (2); Serine/threonine-protein kinase, active site [IPRO08271] (2); Protein kinase, ATP binding site [IPRO17441] (2); Protein kinase-like domain [IPRO11009] (2); Protein kinase domain [IPRO0719] (2); Serine/threonine/tyrosine-protein kinase catalytic domain [IPRO01245] (1); Serine/threonine/dual specificity protein kinase, catalytic domain [IPRO2290] (1); Serine/threonine/tyrosine-protein kinase, catalytic domain [IPRO01245] (1); Concavallin A-like lectin/glucanase domain [IPRO1320] (1) | scaffold_1_mRNA_2342.1           | C_unshiu_00462_mRNA_14.1     | -                               |
| GF0019763 | 1                             | 1                         | 0                            | Hypothetical protein (2)                                                             |                                                                                                                                                                                                                                                                                                                                                                                            |                                                                                                                                                                                                                                                                                                                                                                                                                                                                                                                                                            | scaffold_1_mRNA_2340.1           | C_unshiu_00462_mRNA_13.1     | -                               |
| GF0019762 | 1                             | 1                         | 0                            | S-locus lectin kinase family protein (2)                                             | recognition of pollen [GO:0048544 biological_process] (2)                                                                                                                                                                                                                                                                                                                                  | Bull-type lectin domain [IPRO01480] (2); PAN/Apple domain [IPRO03609] (2); S-locus glycoprotein domain [IPRO00838] (2); Protein kinase-like domain [IPRO11009] (1)                                                                                                                                                                                                                                                                                                                                                                                         | scaffold_1_mRNA_2338.1           | C_unshiu_00210_mRNA_29.1     | -                               |
| GF0019761 | 1                             | 1                         | 0                            | Cysteine-rich RLK (Receptor-like kinase) protein (2)                                 | ATP binding [GO:0005524 molecular_function] (2); protein phosphorylation [GO:0006468 biological_process] (2); protein kinase activity [GO:0004672 molecular_function] (2)                                                                                                                                                                                                                  | Serine/threonine-protein kinase, active site [IPRO08271] (2); Protein kinase domain [IPRO0719] (2); Protein kinase-like domain [IPRO11009] (2); Serine/threonine/tyrosine-protein kinase, catalytic domain [IPRO01245] (1); Serine/threonine/dual specificity protein kinase, catalytic domain [IPRO2290] (1); Serine/threonine/tyrosine-protein kinase catalytic domain [IPRO01245] (1)                                                                                                                                                                   | scaffold_1_mRNA_2332.1           | C_unshiu_01720_mRNA_3.1      | -                               |
| GF0019758 | 1                             | 1                         | 0                            | S-locus lectin protein kinase family protein, putative (1); Hypothetical protein (1) |                                                                                                                                                                                                                                                                                                                                                                                            |                                                                                                                                                                                                                                                                                                                                                                                                                                                                                                                                                            | scaffold_1_mRNA_2308.1           | C_unshiu_00386_mRNA_23.1     | -                               |
| GF0019756 | 1                             | 1                         | 0                            | S-locus lectin kinase family protein (2)                                             | recognition of pollen [GO:0048544 biological_process] (2); protein binding [GO:0005515 molecular_function] (2); protein phosphorylation [GO:0006468 biological_process] (1); protein kinase activity [GO:0004672 molecular_function] (1); ATP binding [GO:0005524 molecular_function] (1); protein tyrosine kinase activity [GO:0004713 molecular_function] (1)                            | Protein kinase-like domain [IPRO11009] (2); Bull-type lectin domain [IPRO01480] (2); PAN/Apple domain [IPRO03609] (2); EGF-like domain [IPRO00742] (2); S-locus glycoprotein domain [IPRO00838] (2); Tyrosine-protein kinase, catalytic domain [IPRO20651] (1); Protein kinase domain [IPRO00719] (1); Serine/threonine/tyrosine-protein kinase, catalytic domain [IPRO01245] (1)                                                                                                                                                                          | scaffold_1_mRNA_2289.1           | C_unshiu_00210_mRNA_28.1     | -                               |

| ID        | Num. in <i>C. clementinae</i> | Num. in <i>C. acutula</i> | Num. in <i>P. trifoliata</i> | Note                                                                                                                                    | GO                                                                                                                                                                                                                                                                                                                 | InterPro                                                                                                                                                                                                                                                                                                                                                                                                                        | Members in <i>C. clementinae</i> | Members in <i>C. acutula</i> | Members in <i>P. trifoliata</i> |
|-----------|-------------------------------|---------------------------|------------------------------|-----------------------------------------------------------------------------------------------------------------------------------------|--------------------------------------------------------------------------------------------------------------------------------------------------------------------------------------------------------------------------------------------------------------------------------------------------------------------|---------------------------------------------------------------------------------------------------------------------------------------------------------------------------------------------------------------------------------------------------------------------------------------------------------------------------------------------------------------------------------------------------------------------------------|----------------------------------|------------------------------|---------------------------------|
| GF0019755 | 1                             | 1                         | 0                            | G-type lectin S-receptor-like serine/threonine-protein kinase (2)                                                                       | protein kinase activity [GO:0004672 molecular_function] (2); recognition of pollen [GO:0048544 biological_process] (2); protein phosphorylation [GO:0006468 biological_process] (2); ATP binding [GO:0005524 molecular_function] (2)                                                                               | Protein kinase domain [IPRO00719] (2); Protein kinase-like domain [IPRO011009] (2); S-locus glycoprotein domain [IPRO00858] (2); Serine/threonine-protein kinase, active site [IPRO08271] (2); Bulb-type lectin domain [IPRO01480] (2); PAN/Apple domain [IPRO03609] (2); Serine-threonine/tyrosine-protein kinase, catalytic domain [IPRO02290] (1); Serine/threonine/tyrosine-protein kinase catalytic domain [IPRO01245] (1) | scaffold_1_mRNA_2384.1           | C_unshiu_00210_mRNA_34.1     | -                               |
| GF0019754 | 1                             | 1                         | 0                            | Retrotransposon protein, putative, unclassified (2)                                                                                     |                                                                                                                                                                                                                                                                                                                    | Retrotransposon gag domain [IPRO05162] (2); Retroviral aspartyl protease [IPRO13242] (2); Aspartic peptidase domain [IPRO02109] (1)                                                                                                                                                                                                                                                                                             | scaffold_1_mRNA_2283.1           | C_unshiu_00210_mRNA_35.1     | -                               |
| GF0019751 | 1                             | 1                         | 0                            | G-type lectin S-receptor-like serine/threonine-protein kinase (2)                                                                       | ATP binding [GO:0005524 molecular_function] (2); protein kinase activity [GO:0004672 molecular_function] (2); recognition of pollen [GO:0048544 biological_process] (2); protein phosphorylation [GO:0006468 biological_process] (2); protein serine/threonine kinase activity [GO:0004674 molecular_function] (1) | Protein kinase-like domain [IPRO011009] (2); Protein kinase domain [IPRO00719] (2); Serine-threonine/tyrosine-protein kinase catalytic domain [IPRO01245] (1); Serine-threonine/tyrosine-protein kinase, catalytic domain [IPRO02290] (1); S-receptor-like serine/threonine-protein kinase [IPRO02417] (1); Concanavalin A-like lectin/glucanase domain [IPRO13320] (1)                                                         | scaffold_1_mRNA_2270.1           | C_unshiu_01737_mRNA_4.1      | -                               |
| GF0019749 | 1                             | 1                         | 0                            | Hypothetical protein (1); RNA-directed DNA polymerase (Reverse transcriptase), Ribonuclease H (1)                                       |                                                                                                                                                                                                                                                                                                                    | Reverse transcriptase domain [IPRO04477] (1)                                                                                                                                                                                                                                                                                                                                                                                    | scaffold_1_mRNA_2267.1           | C_unshiu_00274_mRNA_33.1     | -                               |
| GF0019748 | 1                             | 1                         | 0                            | Hypothetical protein (2)                                                                                                                |                                                                                                                                                                                                                                                                                                                    | EF-hand domain [IPRO02048] (2); EF-Hand 1, calcium-binding site [IPRO18247] (2); EF-hand domain pair [IPRO11992] (2); Protein kinase-like domain [IPRO11009] (1)                                                                                                                                                                                                                                                                | scaffold_1_mRNA_2262.1           | C_unshiu_00274_mRNA_29.1     | -                               |
| GF0019746 | 1                             | 1                         | 0                            | Hypothetical protein (2)                                                                                                                | calcium ion binding [GO:0005509 molecular_function] (2)                                                                                                                                                                                                                                                            |                                                                                                                                                                                                                                                                                                                                                                                                                                 | scaffold_1_mRNA_2248.1           | C_unshiu_00274_mRNA_18.1     | -                               |
| GF0019745 | 1                             | 1                         | 0                            | Hypothetical protein (2)                                                                                                                |                                                                                                                                                                                                                                                                                                                    | Zinc knuckle CX2CX4HXAC [IPRO25836] (2); Domain of unknown function DUF4283 [IPRO25558] (2)                                                                                                                                                                                                                                                                                                                                     | scaffold_1_mRNA_2247.1           | C_unshiu_00274_mRNA_17.1     | -                               |
| GF0019744 | 1                             | 1                         | 0                            | Hypothetical protein (2)                                                                                                                |                                                                                                                                                                                                                                                                                                                    | Reverse transcriptase domain [IPRO04477] (2)                                                                                                                                                                                                                                                                                                                                                                                    | scaffold_1_mRNA_2245.1           | C_unshiu_00274_mRNA_14.1     | -                               |
| GF0019743 | 1                             | 1                         | 0                            | Hypothetical protein (2)                                                                                                                |                                                                                                                                                                                                                                                                                                                    | Reverse transcriptase domain [IPRO04477] (2)                                                                                                                                                                                                                                                                                                                                                                                    | scaffold_1_mRNA_2240.1           | C_unshiu_00274_mRNA_9.1      | -                               |
| GF0019742 | 1                             | 1                         | 0                            | Hypothetical protein (2)                                                                                                                |                                                                                                                                                                                                                                                                                                                    |                                                                                                                                                                                                                                                                                                                                                                                                                                 | scaffold_1_mRNA_2236.1           | C_unshiu_00274_mRNA_6.1      | -                               |
| GF0019741 | 1                             | 1                         | 0                            | Hypothetical protein (2)                                                                                                                |                                                                                                                                                                                                                                                                                                                    |                                                                                                                                                                                                                                                                                                                                                                                                                                 | scaffold_1_mRNA_2235.1           | C_unshiu_00274_mRNA_5.1      | -                               |
| GF0019740 | 1                             | 1                         | 0                            | Hypothetical protein (2)                                                                                                                |                                                                                                                                                                                                                                                                                                                    |                                                                                                                                                                                                                                                                                                                                                                                                                                 | scaffold_1_mRNA_2234.1           | C_unshiu_00274_mRNA_4.1      | -                               |
| GF0019739 | 1                             | 1                         | 0                            | Non-LTR retroelement reverse transcriptase-like protein (2)                                                                             | nucleic acid binding [GO:0003676 molecular_function] (2); RNA-DNA hybrid ribonuclease activity [GO:0004523 molecular_function] (2)                                                                                                                                                                                 | Ribonuclease H domain [IPRO02156] (2); Ribonuclease H-like domain [IPRO12337] (2); Reverse transcriptase zinc-binding domain [IPRO26960] (2)                                                                                                                                                                                                                                                                                    | scaffold_1_mRNA_2230.1           | C_unshiu_00369_mRNA_44.1     | -                               |
| GF0019738 | 1                             | 1                         | 0                            | S-locus lectin kinase family protein, putative (1); S-locus lectin protein kinase family protein isoform 4 (1)                          | recognition of pollen [GO:0048544 biological_process] (2); ATP binding [GO:0005524 molecular_function] (1); protein kinase activity [GO:0004672 molecular_function] (1); protein phosphorylation [GO:0006468 biological_process] (1)                                                                               | S-locus glycoprotein domain [IPRO00858] (2); Bulb-type lectin domain [IPRO01480] (2); Serine-threonine/tyrosine-protein kinase, catalytic domain [IPRO01245] (1); Serine/threonine-protein kinase, active site [IPRO08271] (1); Protein kinase domain [IPRO00719] (1); Protein kinase-like domain [IPRO11009] (1)                                                                                                               | scaffold_1_mRNA_2229.1           | C_unshiu_00369_mRNA_42.1     | -                               |
| GF0019737 | 1                             | 1                         | 0                            | Hypothetical protein (2)                                                                                                                |                                                                                                                                                                                                                                                                                                                    | FBP domain [IPRO06566] (2); Leucine-rich repeat domain, L domain-like [IPRO32675] (2); F-box domain [IPRO1810] (1)                                                                                                                                                                                                                                                                                                              | scaffold_1_mRNA_2194.1           | C_unshiu_00137_mRNA_29.1     | -                               |
| GF0019735 | 1                             | 1                         | 0                            | Hypothetical protein (1); FBD-associated F-box protein At4g10400 (1)                                                                    | protein binding [GO:0005515 molecular_function] (1)                                                                                                                                                                                                                                                                |                                                                                                                                                                                                                                                                                                                                                                                                                                 | scaffold_1_mRNA_2178.1           | C_unshiu_00137_mRNA_39.1     | -                               |
| GF0019734 | 1                             | 1                         | 0                            | Hypothetical protein (2)                                                                                                                | nucleic acid binding [GO:0003676 molecular_function] (2); RNA-DNA hybrid ribonuclease activity [GO:0004523 molecular_function] (2)                                                                                                                                                                                 | Ribonuclease H-like domain [IPRO12337] (2); Ribonuclease H domain [IPRO02156] (2)                                                                                                                                                                                                                                                                                                                                               | scaffold_1_mRNA_2170.1           | C_unshiu_00137_mRNA_48.1     | -                               |
| GF0019733 | 1                             | 1                         | 0                            | Hypothetical protein (2)                                                                                                                | nucleic acid binding [GO:0003676 molecular_function] (1)                                                                                                                                                                                                                                                           | Ribonuclease H-like domain [IPRO12337] (1)                                                                                                                                                                                                                                                                                                                                                                                      | scaffold_1_mRNA_2157.1           | C_unshiu_00993_mRNA_8.1      | -                               |
| GF0019731 | 1                             | 1                         | 0                            | Hypothetical protein (2)                                                                                                                | nucleic acid binding [GO:0003676 molecular_function] (1)                                                                                                                                                                                                                                                           | Ribonuclease H-like domain [IPRO12337] (1)                                                                                                                                                                                                                                                                                                                                                                                      | scaffold_1_mRNA_2152.1           | C_unshiu_00822_mRNA_8.1      | -                               |
| GF0019730 | 1                             | 1                         | 0                            | F-box and associated interaction domains-containing protein (1); Hypothetical protein (1); Ubiquitin carboxyl-terminal hydrolase 12 (1) | protein binding [GO:0005515 molecular_function] (2)                                                                                                                                                                                                                                                                | F-box domain [IPRO01810] (2); WD40/YVTN repeat-like-containing domain [IPRO15943] (1)                                                                                                                                                                                                                                                                                                                                           | scaffold_1_mRNA_2150.1           | C_unshiu_01676_mRNA_4.1      | -                               |
| GF0019729 | 1                             | 1                         | 0                            | Hypothetical protein (2)                                                                                                                | protein binding [GO:0005515 molecular_function] (2)                                                                                                                                                                                                                                                                | TRAF-like domain [IPRO09747] (2); MATH/TRAF domain [IPRO02083] (2)                                                                                                                                                                                                                                                                                                                                                              | scaffold_1_mRNA_2119.1           | C_unshiu_00187_mRNA_33.1     | -                               |
| GF0019728 | 1                             | 1                         | 0                            | Hypothetical protein (2)                                                                                                                |                                                                                                                                                                                                                                                                                                                    |                                                                                                                                                                                                                                                                                                                                                                                                                                 | scaffold_1_mRNA_2102.1           | C_unshiu_00187_mRNA_18.1     | -                               |
| GF0019727 | 1                             | 1                         | 0                            | Hypothetical protein (2)                                                                                                                |                                                                                                                                                                                                                                                                                                                    |                                                                                                                                                                                                                                                                                                                                                                                                                                 | scaffold_1_mRNA_2096.1           | C_unshiu_00187_mRNA_11.1     | -                               |
| GF0019726 | 1                             | 1                         | 0                            | Hypothetical protein (2)                                                                                                                |                                                                                                                                                                                                                                                                                                                    |                                                                                                                                                                                                                                                                                                                                                                                                                                 | scaffold_1_mRNA_2093.1           | C_unshiu_00187_mRNA_8.1      | -                               |
| GF0019725 | 1                             | 1                         | 0                            | Hypothetical protein (2)                                                                                                                |                                                                                                                                                                                                                                                                                                                    |                                                                                                                                                                                                                                                                                                                                                                                                                                 | scaffold_1_mRNA_2087.1           | C_unshiu_00429_mRNA_23.1     | -                               |
| GF0019724 | 1                             | 1                         | 0                            | DNAse 1 superfamily protein, putative (1); Hypothetical protein (1)                                                                     |                                                                                                                                                                                                                                                                                                                    | Endonuclease/exonuclease/phosphatase [IPRO15153] (1)                                                                                                                                                                                                                                                                                                                                                                            | scaffold_1_mRNA_2084.1           | C_unshiu_00087_mRNA_18.1     | -                               |
| GF0019723 | 1                             | 1                         | 0                            | Hypothetical protein (2)                                                                                                                | protein binding [GO:0005515 molecular_function] (2); zinc ion binding [GO:0008270 molecular_function] (2)                                                                                                                                                                                                          | Zinc finger, RING-type [IPRO01841] (2); Zinc finger, RING-FYVE/PHD-type [IPRO13083] (2)                                                                                                                                                                                                                                                                                                                                         | scaffold_1_mRNA_2059.1           | C_unshiu_00044_mRNA_20.1     | -                               |
| GF0019722 | 1                             | 1                         | 0                            | Hypothetical protein (2)                                                                                                                |                                                                                                                                                                                                                                                                                                                    |                                                                                                                                                                                                                                                                                                                                                                                                                                 | scaffold_1_mRNA_2058.1           | C_unshiu_00044_mRNA_21.1     | -                               |
| GF0019721 | 1                             | 1                         | 0                            | Hypothetical protein (2)                                                                                                                |                                                                                                                                                                                                                                                                                                                    |                                                                                                                                                                                                                                                                                                                                                                                                                                 | scaffold_1_mRNA_2052.1           | C_unshiu_00044_mRNA_26.1     | -                               |
| GF0019720 | 1                             | 1                         | 0                            | Hypothetical protein (2)                                                                                                                |                                                                                                                                                                                                                                                                                                                    |                                                                                                                                                                                                                                                                                                                                                                                                                                 | scaffold_1_mRNA_2049.1           | C_unshiu_00044_mRNA_28.1     | -                               |
| GF0019719 | 1                             | 1                         | 0                            | Hypothetical protein (2)                                                                                                                | ADP binding [GO:0043531 molecular_function] (2)                                                                                                                                                                                                                                                                    | NB-ARC [IPRO02182] (2); AAA+ ATPase domain [IPRO03593] (2); P-loop containing nucleoside triphosphate hydrolase [IPRO027417] (2); Leucine-rich repeat domain, L domain-like [IPRO32675] (2); Winged helix-turn-helix DNA-binding domain [IPRO11991] (1)                                                                                                                                                                         | scaffold_1_mRNA_2048.1           | C_unshiu_00044_mRNA_30.1     | -                               |
| GF0019717 | 1                             | 1                         | 0                            | Serine/threonine-protein kinase isoform 2 (2)                                                                                           | ATP binding [GO:0005524 molecular_function] (2); protein phosphorylation [GO:0006468 biological_process] (2); protein kinase activity [GO:0004672 molecular_function] (2)                                                                                                                                          | Protein kinase-like domain [IPRO011009] (2); Protein kinase domain [IPRO00719] (2); Serine/threonine-protein kinase, active site [IPRO08271] (2); Protein kinase, ATP binding site [IPRO17441] (2); Serine/threonine/tyrosine-protein kinase, catalytic domain [IPRO02290] (1)                                                                                                                                                  | scaffold_1_mRNA_2038.1           | C_unshiu_00044_mRNA_46.1     | -                               |
| GF0019716 | 1                             | 1                         | 0                            | Legume lectin family protein (2)                                                                                                        | carbohydrate binding [GO:0030246 molecular_function] (2)                                                                                                                                                                                                                                                           | Legume lectin domain [IPRO01220] (2); Concanavalin A-like lectin/glucanase domain [IPRO13320] (2); Lectin [IPRO16363] (1); Legume lectin [IPRO16363] (1)                                                                                                                                                                                                                                                                        | scaffold_1_mRNA_2037.1           | C_unshiu_00044_mRNA_48.1     | -                               |
| GF0019715 | 1                             | 1                         | 0                            | Early nodulin-like protein 2 (2)                                                                                                        | electron carrier activity [GO:0009055 molecular_function] (2)                                                                                                                                                                                                                                                      | Cupredoxin [IPRO08922] (2); Phycocyanin domain [IPRO03245] (2)                                                                                                                                                                                                                                                                                                                                                                  | scaffold_1_mRNA_2022.1           | C_unshiu_00044_mRNA_62.1     | -                               |
| GF0019711 | 1                             | 1                         | 0                            | Hypothetical protein (2)                                                                                                                |                                                                                                                                                                                                                                                                                                                    |                                                                                                                                                                                                                                                                                                                                                                                                                                 | scaffold_1_mRNA_2010.1           | C_unshiu_00247_mRNA_35.1     | -                               |
| GF0019710 | 1                             | 1                         | 0                            | Hypothetical protein (2)                                                                                                                |                                                                                                                                                                                                                                                                                                                    |                                                                                                                                                                                                                                                                                                                                                                                                                                 | scaffold_1_mRNA_1995.1           | C_unshiu_00035_mRNA_48.1     | -                               |
| GF0019708 | 1                             | 1                         | 0                            | Hypothetical protein (2)                                                                                                                |                                                                                                                                                                                                                                                                                                                    |                                                                                                                                                                                                                                                                                                                                                                                                                                 | scaffold_1_mRNA_1986.1           | C_unshiu_00035_mRNA_60.1     | -                               |
| GF0019707 | 1                             | 1                         | 0                            | Hypothetical protein (2)                                                                                                                |                                                                                                                                                                                                                                                                                                                    |                                                                                                                                                                                                                                                                                                                                                                                                                                 | scaffold_1_mRNA_1985.1           | C_unshiu_00035_mRNA_61.1     | -                               |
| GF0019706 | 1                             | 1                         | 0                            | Hypothetical protein (2)                                                                                                                |                                                                                                                                                                                                                                                                                                                    |                                                                                                                                                                                                                                                                                                                                                                                                                                 | scaffold_1_mRNA_1984.1           | C_unshiu_00035_mRNA_62.1     | -                               |
| GF0019704 | 1                             | 1                         | 0                            | Hypothetical protein (2)                                                                                                                |                                                                                                                                                                                                                                                                                                                    |                                                                                                                                                                                                                                                                                                                                                                                                                                 | scaffold_1_mRNA_1970.1           | C_unshiu_00035_mRNA_75.1     | -                               |
| GF0019703 | 1                             | 1                         | 0                            | Glycoside hydrolase family 79 amino-terminal domain protein (2)                                                                         | membrane [GO:0016020 cellular_component] (2); hydrolase activity, acting on glycosyl bonds [GO:0016798 molecular_function] (2); carbohydrate metabolic process [GO:0005975 biological_process] (1)                                                                                                                 | Glycoside hydrolase superfamily [IPRO17853] (2); Glycoside hydrolase, family 79 [IPRO05199] (2); Glycoside hydrolase, catalytic domain [IPRO13781] (1)                                                                                                                                                                                                                                                                          | scaffold_1_mRNA_1971.1           | C_unshiu_00005_mRNA_97.1     | -                               |
| GF0019702 | 1                             | 1                         | 0                            | NBS-LRR class resistance protein Fy1-Ry1 (2)                                                                                            | ADP binding [GO:0043531 molecular_function] (2)                                                                                                                                                                                                                                                                    | P-loop containing nucleoside triphosphate hydrolase [IPRO027417] (2); NB-ARC [IPRO02182] (2); Winged helix-turn-helix DNA-binding domain [IPRO11991] (1)                                                                                                                                                                                                                                                                        | scaffold_1_mRNA_1968.1           | C_unshiu_00035_mRNA_77.1     | -                               |
| GF0019701 | 1                             | 1                         | 0                            | Putative disease resistance protein (2)                                                                                                 | ADP binding [GO:0043531 molecular_function] (2)                                                                                                                                                                                                                                                                    | NB-ARC [IPRO02182] (2); P-loop containing nucleoside triphosphate hydrolase [IPRO027417] (2); Winged helix-turn-helix DNA-binding domain [IPRO11991] (1)                                                                                                                                                                                                                                                                        | scaffold_1_mRNA_1967.1           | C_unshiu_00035_mRNA_78.1     | -                               |
| GF0019700 | 1                             | 1                         | 0                            | Hypothetical protein (2)                                                                                                                |                                                                                                                                                                                                                                                                                                                    |                                                                                                                                                                                                                                                                                                                                                                                                                                 | scaffold_1_mRNA_1964.1           | C_unshiu_00648_mRNA_13.1     | -                               |
| GF0019699 | 1                             | 1                         | 0                            | Hypothetical protein (2)                                                                                                                |                                                                                                                                                                                                                                                                                                                    |                                                                                                                                                                                                                                                                                                                                                                                                                                 | scaffold_1_mRNA_1958.1           | C_unshiu_00035_mRNA_84.1     | -                               |
| GF0019698 | 1                             | 1                         | 0                            | Hypothetical protein (2)                                                                                                                |                                                                                                                                                                                                                                                                                                                    |                                                                                                                                                                                                                                                                                                                                                                                                                                 | scaffold_1_mRNA_1956.1           | C_unshiu_00035_mRNA_87.1     | -                               |
| GF0019697 | 1                             | 1                         | 0                            | Hypothetical protein (2)                                                                                                                |                                                                                                                                                                                                                                                                                                                    |                                                                                                                                                                                                                                                                                                                                                                                                                                 | scaffold_1_mRNA_1955.1           | C_unshiu_00035_mRNA_88.1     | -                               |
| GF0019696 | 1                             | 1                         | 0                            | Hypothetical protein (2)                                                                                                                |                                                                                                                                                                                                                                                                                                                    | Probable transposase, Pta/Eta/Spm, plant [IPRO04252] (2)                                                                                                                                                                                                                                                                                                                                                                        | scaffold_1_mRNA_1949.1           | C_unshiu_00035_mRNA_94.1     | -                               |
| GF0019695 | 1                             | 1                         | 0                            | Hypothetical protein (2)                                                                                                                |                                                                                                                                                                                                                                                                                                                    |                                                                                                                                                                                                                                                                                                                                                                                                                                 | scaffold_1_mRNA_1936.1           | C_unshiu_00452_mRNA_3.1      | -                               |
| GF0019694 | 1                             | 1                         | 0                            | Hypothetical protein (2)                                                                                                                |                                                                                                                                                                                                                                                                                                                    |                                                                                                                                                                                                                                                                                                                                                                                                                                 | scaffold_1_mRNA_1931.1           | C_unshiu_00452_mRNA_12.1     | -                               |
| GF0019693 | 1                             | 1                         | 0                            | Hypothetical protein (2)                                                                                                                |                                                                                                                                                                                                                                                                                                                    |                                                                                                                                                                                                                                                                                                                                                                                                                                 | scaffold_1_mRNA_1929.1           | C_unshiu_00452_mRNA_14.1     | -                               |

| ID       | Num. in <i>C. clementiae</i> | Num. in <i>C. acutis</i> | Num. in <i>P. trifoliata</i> | Note                                                                     | GO                                                                                                                                                                                                                                                                                                                                                                                         | InterPro                                                                                                                                                                                                                                                                                                                                                                                                                                                                                                                                                                     | Members in <i>C. clementiae</i> | Members in <i>C. acutis</i> | Members in <i>P. trifoliata</i> |
|----------|------------------------------|--------------------------|------------------------------|--------------------------------------------------------------------------|--------------------------------------------------------------------------------------------------------------------------------------------------------------------------------------------------------------------------------------------------------------------------------------------------------------------------------------------------------------------------------------------|------------------------------------------------------------------------------------------------------------------------------------------------------------------------------------------------------------------------------------------------------------------------------------------------------------------------------------------------------------------------------------------------------------------------------------------------------------------------------------------------------------------------------------------------------------------------------|---------------------------------|-----------------------------|---------------------------------|
| GF001962 | 1                            | 1                        | 0                            | Hypothetical protein (2)                                                 | ADP binding [GO:004353] molecular_function (2); nucleic acid binding [GO:0003676 molecular_function] (1); DNA integration [GO:0015074 biological_process] (1)                                                                                                                                                                                                                              | P-loop containing nucleoside triphosphate hydrolase [IPR027417] (2); NR-ARC [IPR002182] (2); Integrase, catalytic core domain [IPR01584] (1); Ribonuclease H-like domain [IPR012337] (1)                                                                                                                                                                                                                                                                                                                                                                                     | scaffold_1_mRNA_1926.1          | C.unshiu_00452_mRNA_17.1    | -                               |
| GF001961 | 1                            | 1                        | 0                            | Hypothetical protein (2)                                                 |                                                                                                                                                                                                                                                                                                                                                                                            |                                                                                                                                                                                                                                                                                                                                                                                                                                                                                                                                                                              | scaffold_1_mRNA_1925.1          | C.unshiu_00452_mRNA_18.1    | -                               |
| GF001960 | 1                            | 1                        | 0                            | Hypothetical protein (2)                                                 |                                                                                                                                                                                                                                                                                                                                                                                            | Harbinger transposase-derived nuclease domain [IPR027806] (2)                                                                                                                                                                                                                                                                                                                                                                                                                                                                                                                | scaffold_1_mRNA_1917.1          | C.unshiu_00452_mRNA_23.1    | -                               |
| GF001969 | 1                            | 1                        | 0                            | Cytokinin riboside 5'-monophosphate phosphoribohydrolase (2)             |                                                                                                                                                                                                                                                                                                                                                                                            | LOG family [IPR031100] (2); Cytokinin riboside 5'-monophosphate phosphoribohydrolase LOG [IPR005269] (2)                                                                                                                                                                                                                                                                                                                                                                                                                                                                     | scaffold_1_mRNA_1914.1          | C.unshiu_00452_mRNA_25.1    | -                               |
| GF001968 | 1                            | 1                        | 0                            | Hypothetical protein (2)                                                 |                                                                                                                                                                                                                                                                                                                                                                                            |                                                                                                                                                                                                                                                                                                                                                                                                                                                                                                                                                                              | scaffold_1_mRNA_191.1           | C.unshiu_00852_mRNA_13.1    | -                               |
| GF001967 | 1                            | 1                        | 0                            | NO APICAL MERISTEM (2)                                                   | regulation of transcription, DNA-templated [GO:0006355 biological_process] (2); phosphotransferase activity, alcohol group as acceptor [GO:0016773 molecular_function] (2); DNA binding [GO:0003677 molecular_function] (2)                                                                                                                                                                | NAC domain [IPR003441] (2); Carbohydrate/puine kinase, PkB, conserved site [IPR002173] (2)                                                                                                                                                                                                                                                                                                                                                                                                                                                                                   | scaffold_1_mRNA_1909.1          | C.unshiu_00282_mRNA_2.1     | -                               |
| GF001966 | 1                            | 1                        | 0                            | Hypothetical protein (2)                                                 |                                                                                                                                                                                                                                                                                                                                                                                            |                                                                                                                                                                                                                                                                                                                                                                                                                                                                                                                                                                              | scaffold_1_mRNA_1906.1          | C.unshiu_00282_mRNA_5.1     | -                               |
| GF001964 | 1                            | 1                        | 0                            | Hypothetical protein (2)                                                 |                                                                                                                                                                                                                                                                                                                                                                                            |                                                                                                                                                                                                                                                                                                                                                                                                                                                                                                                                                                              | scaffold_1_mRNA_1894.1          | C.unshiu_00282_mRNA_17.1    | -                               |
| GF001963 | 1                            | 1                        | 0                            | Hypothetical protein (2)                                                 |                                                                                                                                                                                                                                                                                                                                                                                            |                                                                                                                                                                                                                                                                                                                                                                                                                                                                                                                                                                              | scaffold_1_mRNA_1885.1          | C.unshiu_00108_mRNA_31.1    | -                               |
| GF001962 | 1                            | 1                        | 0                            | Hypothetical protein (2)                                                 |                                                                                                                                                                                                                                                                                                                                                                                            |                                                                                                                                                                                                                                                                                                                                                                                                                                                                                                                                                                              | scaffold_1_mRNA_1877.1          | C.unshiu_00108_mRNA_20.1    | -                               |
| GF001960 | 1                            | 1                        | 0                            | Hypothetical protein (2)                                                 |                                                                                                                                                                                                                                                                                                                                                                                            |                                                                                                                                                                                                                                                                                                                                                                                                                                                                                                                                                                              | scaffold_1_mRNA_1856.1          | C.unshiu_01127_mRNA_4.1     | -                               |
| GF001967 | 1                            | 1                        | 0                            | Hypothetical protein (2)                                                 |                                                                                                                                                                                                                                                                                                                                                                                            | Trichome birefringence-like family [IPR02982] (2); PMRS N-terminal domain [IPR025846] (2); PC-Esterase [IPR026571] (2)                                                                                                                                                                                                                                                                                                                                                                                                                                                       | scaffold_1_mRNA_1836.1          | C.unshiu_00288_mRNA_3.1     | -                               |
| GF001968 | 1                            | 1                        | 0                            | Ferredoxinase (2)                                                        |                                                                                                                                                                                                                                                                                                                                                                                            | PC-Esterase [IPR026571] (2); Trichome birefringence-like family [IPR02982] (2)                                                                                                                                                                                                                                                                                                                                                                                                                                                                                               | scaffold_1_mRNA_1834.1          | C.unshiu_00288_mRNA_5.1     | -                               |
| GF001967 | 1                            | 1                        | 0                            | Lipid transfer protein 2 (2)                                             | lipid binding [GO:0008289 biological_function] (2); lipid transport [GO:0006869 biological_process] (2)                                                                                                                                                                                                                                                                                    | Plant lipid transfer protein/Par allergen [IPR005258] (2); Bifunctional inhibitor/plant lipid transfer/protein storage helical domain [IPR016140] (2)                                                                                                                                                                                                                                                                                                                                                                                                                        | scaffold_1_mRNA_1818.1          | C.unshiu_01700_mRNA_5.1     | -                               |
| GF001966 | 1                            | 1                        | 0                            | Hypothetical protein (2)                                                 |                                                                                                                                                                                                                                                                                                                                                                                            | Domain of unknown function DUF1985 [IPR15410] (2)                                                                                                                                                                                                                                                                                                                                                                                                                                                                                                                            | scaffold_1_mRNA_1815.1          | C.unshiu_01700_mRNA_8.1     | -                               |
| GF001965 | 1                            | 1                        | 0                            | Hypothetical protein (2)                                                 |                                                                                                                                                                                                                                                                                                                                                                                            | Transposase, MuDR, plant [IPR004332] (2)                                                                                                                                                                                                                                                                                                                                                                                                                                                                                                                                     | scaffold_1_mRNA_1814.1          | C.unshiu_01700_mRNA_10.1    | -                               |
| GF001963 | 1                            | 1                        | 0                            | Hypothetical protein (2)                                                 |                                                                                                                                                                                                                                                                                                                                                                                            |                                                                                                                                                                                                                                                                                                                                                                                                                                                                                                                                                                              | scaffold_1_mRNA_1810.1          | C.unshiu_00426_mRNA_19.1    | -                               |
| GF001961 | 1                            | 1                        | 0                            | Hypothetical protein (2)                                                 | proteolysis [GO:0006508 biological_process] (2); cysteine-type peptidase activity [GO:0008234 molecular_function] (2)                                                                                                                                                                                                                                                                      | Ulp1 protease family, C-terminal catalytic domain [IPR03653] (2)                                                                                                                                                                                                                                                                                                                                                                                                                                                                                                             | scaffold_1_mRNA_1806.1          | C.unshiu_00426_mRNA_22.1    | -                               |
| GF001960 | 1                            | 1                        | 0                            | Caffeic acid 3-O-methyltransferase (1); Caffeate O-methyltransferase (1) | O-methyltransferase activity [GO:0008171 molecular_function] (2); methyltransferase activity [GO:0008168 molecular_function] (2)                                                                                                                                                                                                                                                           | Winged helix-turn-helix DNA-binding domain [IPR011991] (2); O-methyltransferase, family 2 [IPR010107] (2); O-methyltransferase COMT-type [IPR014651] (2); S-adenosyl-L-methionine-dependent methyltransferase [IPR029063] (2)                                                                                                                                                                                                                                                                                                                                                | scaffold_1_mRNA_1799.1          | C.unshiu_00426_mRNA_25.1    | -                               |
| GF001959 | 1                            | 1                        | 0                            | Hypothetical protein (2)                                                 |                                                                                                                                                                                                                                                                                                                                                                                            |                                                                                                                                                                                                                                                                                                                                                                                                                                                                                                                                                                              | scaffold_1_mRNA_1798.1          | C.unshiu_00426_mRNA_26.1    | -                               |
| GF001958 | 1                            | 1                        | 0                            | Hypothetical protein (2)                                                 |                                                                                                                                                                                                                                                                                                                                                                                            |                                                                                                                                                                                                                                                                                                                                                                                                                                                                                                                                                                              | scaffold_1_mRNA_1792.1          | C.unshiu_01098_mRNA_5.1     | -                               |
| GF001957 | 1                            | 1                        | 0                            | Hypothetical protein (2)                                                 |                                                                                                                                                                                                                                                                                                                                                                                            | Domain of unknown function DUF4219 [IPR025314] (2)                                                                                                                                                                                                                                                                                                                                                                                                                                                                                                                           | scaffold_1_mRNA_1790.1          | C.unshiu_01098_mRNA_3.1     | -                               |
| GF001956 | 1                            | 1                        | 0                            | Hypothetical protein (2)                                                 |                                                                                                                                                                                                                                                                                                                                                                                            |                                                                                                                                                                                                                                                                                                                                                                                                                                                                                                                                                                              | scaffold_1_mRNA_1780.1          | C.unshiu_00694_mRNA_4.1     | -                               |
| GF001955 | 1                            | 1                        | 0                            | Hypothetical protein (2)                                                 |                                                                                                                                                                                                                                                                                                                                                                                            | Domain of unknown function DUF4371 [IPR025398] (2)                                                                                                                                                                                                                                                                                                                                                                                                                                                                                                                           | scaffold_1_mRNA_1777.1          | C.unshiu_00694_mRNA_8.1     | -                               |
| GF001954 | 1                            | 1                        | 0                            | Hypothetical protein (2)                                                 |                                                                                                                                                                                                                                                                                                                                                                                            |                                                                                                                                                                                                                                                                                                                                                                                                                                                                                                                                                                              | scaffold_1_mRNA_1771.1          | C.unshiu_00694_mRNA_14.1    | -                               |
| GF001953 | 1                            | 1                        | 0                            | Hypothetical protein (2)                                                 |                                                                                                                                                                                                                                                                                                                                                                                            |                                                                                                                                                                                                                                                                                                                                                                                                                                                                                                                                                                              | scaffold_1_mRNA_1770.1          | C.unshiu_02477_mRNA_3.1     | -                               |
| GF001952 | 1                            | 1                        | 0                            | Hypothetical protein (2)                                                 |                                                                                                                                                                                                                                                                                                                                                                                            |                                                                                                                                                                                                                                                                                                                                                                                                                                                                                                                                                                              | scaffold_1_mRNA_1769.1          | C.unshiu_00022_mRNA_3.1     | -                               |
| GF001951 | 1                            | 1                        | 0                            | Hypothetical protein (2)                                                 |                                                                                                                                                                                                                                                                                                                                                                                            | Transposase, MuDR, plant [IPR004332] (2)                                                                                                                                                                                                                                                                                                                                                                                                                                                                                                                                     | scaffold_1_mRNA_1762.1          | C.unshiu_00944_mRNA_4.1     | -                               |
| GF001950 | 1                            | 1                        | 0                            | Hypothetical protein (2)                                                 |                                                                                                                                                                                                                                                                                                                                                                                            | Winged helix-turn-helix DNA-binding domain [IPR011991] (2); O-methyltransferase, family 2 [IPR010107] (2); O-methyltransferase COMT-type [IPR014651] (2); S-adenosyl-L-methionine-dependent methyltransferase [IPR029063] (2)                                                                                                                                                                                                                                                                                                                                                | scaffold_1_mRNA_1761.1          | C.unshiu_00944_mRNA_3.1     | -                               |
| GF001949 | 1                            | 1                        | 0                            | Hypothetical protein (2)                                                 |                                                                                                                                                                                                                                                                                                                                                                                            | Peptidase S24S26A/S26B/S26C [IPR015927] (2); Aldo keto reductase, conserved site [IPR018170] (2); NADP-dependent oxidoreductase domain [IPR023210] (2); Aldo keto reductase/potassium channel subunit beta [IPR01395] (1)                                                                                                                                                                                                                                                                                                                                                    | scaffold_1_mRNA_1758.1          | C.unshiu_00770_mRNA_2.1     | -                               |
| GF001948 | 1                            | 1                        | 0                            | Hypothetical protein (2)                                                 |                                                                                                                                                                                                                                                                                                                                                                                            |                                                                                                                                                                                                                                                                                                                                                                                                                                                                                                                                                                              | scaffold_1_mRNA_1757.1          | C.unshiu_01217_mRNA_3.1     | -                               |
| GF001947 | 1                            | 1                        | 0                            | Hypothetical protein (2)                                                 | oxidoreductase activity [GO:0016491 molecular_function] (2); oxidation-reduction process [GO:0055114 biological_process] (2)                                                                                                                                                                                                                                                               | Aldo keto reductase, conserved site [IPR018170] (2); NADP-dependent oxidoreductase domain [IPR023210] (2); Aldo keto reductase/potassium channel subunit beta [IPR01395] (1); Aldo keto reductase [IPR020471] (1)                                                                                                                                                                                                                                                                                                                                                            | scaffold_1_mRNA_1752.1          | C.unshiu_01217_mRNA_6.1     | -                               |
| GF001946 | 1                            | 1                        | 0                            | Hypothetical protein (2)                                                 |                                                                                                                                                                                                                                                                                                                                                                                            |                                                                                                                                                                                                                                                                                                                                                                                                                                                                                                                                                                              | scaffold_1_mRNA_1750.1          | C.unshiu_01217_mRNA_8.1     | -                               |
| GF001945 | 1                            | 1                        | 0                            | Hypothetical protein (2)                                                 |                                                                                                                                                                                                                                                                                                                                                                                            |                                                                                                                                                                                                                                                                                                                                                                                                                                                                                                                                                                              | scaffold_1_mRNA_1740.1          | C.unshiu_00455_mRNA_22.1    | -                               |
| GF001943 | 1                            | 1                        | 0                            | Hypothetical protein (2)                                                 |                                                                                                                                                                                                                                                                                                                                                                                            |                                                                                                                                                                                                                                                                                                                                                                                                                                                                                                                                                                              | scaffold_1_mRNA_1739.1          | C.unshiu_00455_mRNA_20.1    | -                               |
| GF001942 | 1                            | 1                        | 0                            | Hypothetical protein (2)                                                 | iron ion binding [GO:0005506 molecular_function] (2); L-ascorbic acid binding [GO:0031418 molecular_function] (2); oxidoreductase activity, acting on paired donors, with incorporation or reduction of molecular oxygen [GO:0016705 molecular_function] (2); oxidoreductase activity [GO:0016491 molecular_function] (2); oxidation-reduction process [GO:0055114 biological_process] (2) | Proyl 4-hydroxylase, alpha subunit [IPR006620] (2); Oxoglutarate/iron-dependent dioxygenase [IPR005123] (2)                                                                                                                                                                                                                                                                                                                                                                                                                                                                  | scaffold_1_mRNA_1732.1          | C.unshiu_00455_mRNA_11.1    | -                               |
| GF001941 | 1                            | 1                        | 0                            | Hypothetical protein (2)                                                 |                                                                                                                                                                                                                                                                                                                                                                                            |                                                                                                                                                                                                                                                                                                                                                                                                                                                                                                                                                                              | scaffold_1_mRNA_1731.1          | C.unshiu_00455_mRNA_10.1    | -                               |
| GF001940 | 1                            | 1                        | 0                            | Hypothetical protein (2)                                                 |                                                                                                                                                                                                                                                                                                                                                                                            | Leucine-rich repeat domain, L domain-like [IPR032975] (2); PAN/Apple domain [IPR003609] (2); S-locus glycoprotein domain [IPR000858] (2); Serine/threonine-protein kinase, active site [IPR008271] (2); Protein kinase-like domain [IPR011009] (2); Protein kinase domain [IPR000719] (2); Bulb-type lectin domain [IPR001480] (1); Serine/threonine/tyrosine-protein kinase catalytic domain [IPR01245] (1); Serine/threonine/dual specificity protein kinase, catalytic domain [IPR002290] (1); Serine/threonine/tyrosine-protein kinase, catalytic domain [IPR001245] (1) | scaffold_1_mRNA_1730.1          | C.unshiu_00071_mRNA_41.1    | -                               |
| GF001939 | 1                            | 1                        | 0                            | Hypothetical protein (2)                                                 |                                                                                                                                                                                                                                                                                                                                                                                            |                                                                                                                                                                                                                                                                                                                                                                                                                                                                                                                                                                              | scaffold_1_mRNA_1716.1          | C.unshiu_00071_mRNA_37.1    | -                               |
| GF001938 | 1                            | 1                        | 0                            | Hypothetical protein (2)                                                 |                                                                                                                                                                                                                                                                                                                                                                                            |                                                                                                                                                                                                                                                                                                                                                                                                                                                                                                                                                                              | scaffold_1_mRNA_1714.1          | C.unshiu_00071_mRNA_35.1    | -                               |
| GF001937 | 1                            | 1                        | 0                            | Hypothetical protein (2)                                                 |                                                                                                                                                                                                                                                                                                                                                                                            |                                                                                                                                                                                                                                                                                                                                                                                                                                                                                                                                                                              | scaffold_1_mRNA_1713.1          | C.unshiu_00071_mRNA_34.1    | -                               |
| GF001936 | 1                            | 1                        | 0                            | Hypothetical protein (2)                                                 | nucleic acid binding [GO:0003676 molecular_function] (2)                                                                                                                                                                                                                                                                                                                                   | Ribonuclease H-like domain [IPR012337] (2)                                                                                                                                                                                                                                                                                                                                                                                                                                                                                                                                   | scaffold_1_mRNA_1712.1          | C.unshiu_00071_mRNA_33.1    | -                               |
| GF001935 | 1                            | 1                        | 0                            | Hypothetical protein (2)                                                 |                                                                                                                                                                                                                                                                                                                                                                                            |                                                                                                                                                                                                                                                                                                                                                                                                                                                                                                                                                                              | scaffold_1_mRNA_1707.1          | C.unshiu_00071_mRNA_28.1    | -                               |
| GF001934 | 1                            | 1                        | 0                            | Pre-mRNA-splicing factor SPF27 (2)                                       | mRNA processing [GO:0006397 biological_process] (2)                                                                                                                                                                                                                                                                                                                                        | Pre-mRNA-splicing factor SPF27 [IPR008409] (2)                                                                                                                                                                                                                                                                                                                                                                                                                                                                                                                               | scaffold_1_mRNA_1705.1          | C.unshiu_00071_mRNA_26.1    | -                               |
| GF001933 | 1                            | 1                        | 0                            | Hypothetical protein (2)                                                 | protein dimerization activity [GO:0046083 molecular_function] (2); nucleic acid binding [GO:0003676 molecular_function] (2); DNA binding [GO:0003677 molecular_function] (2)                                                                                                                                                                                                               | HAT, C-terminal dimerisation domain [IPR008986] (2); Ribonuclease H-like domain [IPR012337] (2); HAT-like transposase, RNase-H fold [IPR025525] (2)                                                                                                                                                                                                                                                                                                                                                                                                                          | scaffold_1_mRNA_1702.1          | C.unshiu_00071_mRNA_24.1    | -                               |
| GF001932 | 1                            | 1                        | 0                            | Hypothetical protein (2)                                                 |                                                                                                                                                                                                                                                                                                                                                                                            |                                                                                                                                                                                                                                                                                                                                                                                                                                                                                                                                                                              | scaffold_1_mRNA_1701.1          | C.unshiu_00071_mRNA_23.1    | -                               |
| GF001931 | 1                            | 1                        | 0                            | Hypothetical protein (2)                                                 |                                                                                                                                                                                                                                                                                                                                                                                            | Transposase-associated domain [IPR029480] (2)                                                                                                                                                                                                                                                                                                                                                                                                                                                                                                                                | scaffold_1_mRNA_1693.1          | C.unshiu_00071_mRNA_14.1    | -                               |
| GF001930 | 1                            | 1                        | 0                            | 66 kDa stress protein (2)                                                | protein binding [GO:0005515 molecular_function] (2)                                                                                                                                                                                                                                                                                                                                        | WD40-repeat-containing domain [IPR017986] (2); WD40 repeat [IPR01640] (2); WD40 repeat conserved site [IPR019775] (2); WD40/YVTN repeat-like-containing domain [IPR015943] (2)                                                                                                                                                                                                                                                                                                                                                                                               | scaffold_1_mRNA_1689.1          | C.unshiu_00071_mRNA_10.1    | -                               |
| GF001929 | 1                            | 1                        | 0                            | Hypothetical protein (2)                                                 |                                                                                                                                                                                                                                                                                                                                                                                            |                                                                                                                                                                                                                                                                                                                                                                                                                                                                                                                                                                              | scaffold_1_mRNA_1684.1          | C.unshiu_00071_mRNA_4.1     | -                               |
| GF001928 | 1                            | 1                        | 0                            | Hypothetical protein (2)                                                 |                                                                                                                                                                                                                                                                                                                                                                                            |                                                                                                                                                                                                                                                                                                                                                                                                                                                                                                                                                                              | scaffold_1_mRNA_1673.1          | C.unshiu_00097_mRNA_45.1    | -                               |
| GF001927 | 1                            | 1                        | 0                            | Hypothetical protein (2)                                                 |                                                                                                                                                                                                                                                                                                                                                                                            | Tetratricopeptide-like helical domain [IPR011990] (2); Pentatricopeptide repeat [IPR008851] (2); Expansion/pollen allergen, DPBB domain [IPR007112] (1); RipA-like protein, double-psi beta-barrel domain [IPR009009] (1)                                                                                                                                                                                                                                                                                                                                                    | scaffold_1_mRNA_1670.1          | C.unshiu_00097_mRNA_47.1    | -                               |
| GF001926 | 1                            | 1                        | 0                            | Hypothetical protein (2)                                                 |                                                                                                                                                                                                                                                                                                                                                                                            | Retroviral integrase domain [IPR005162] (2)                                                                                                                                                                                                                                                                                                                                                                                                                                                                                                                                  | scaffold_1_mRNA_1667.1          | C.unshiu_02271_mRNA_2.1     | -                               |
| GF001925 | 1                            | 1                        | 0                            | Transposable element Ac (2)                                              | nucleic acid binding [GO:0003676 molecular_function] (2)                                                                                                                                                                                                                                                                                                                                   | Ribonuclease H-like domain [IPR012337] (2)                                                                                                                                                                                                                                                                                                                                                                                                                                                                                                                                   | scaffold_1_mRNA_1663.1          | C.unshiu_02806_mRNA_2.1     | -                               |
| GF001924 | 1                            | 1                        | 0                            | Hypothetical protein (2)                                                 |                                                                                                                                                                                                                                                                                                                                                                                            |                                                                                                                                                                                                                                                                                                                                                                                                                                                                                                                                                                              | scaffold_1_mRNA_1653.1          | C.unshiu_00750_mRNA_4.1     | -                               |
| GF001923 | 1                            | 1                        | 0                            | Hypothetical protein (2)                                                 |                                                                                                                                                                                                                                                                                                                                                                                            |                                                                                                                                                                                                                                                                                                                                                                                                                                                                                                                                                                              | scaffold_1_mRNA_1644.1          | C.unshiu_00462_mRNA_5.1     | -                               |
| GF001922 | 1                            | 1                        | 0                            | Hypothetical protein (2)                                                 |                                                                                                                                                                                                                                                                                                                                                                                            |                                                                                                                                                                                                                                                                                                                                                                                                                                                                                                                                                                              | scaffold_1_mRNA_1643.1          | C.unshiu_00462_mRNA_6.1     | -                               |
| GF001921 | 1                            | 1                        | 0                            | Hypothetical protein (2)                                                 | trehalose biosynthetic process [GO:000592 biological_process] (2); catalytic activity [GO:0003824 molecular_function] (2)                                                                                                                                                                                                                                                                  | Trehalose phosphorylase [IPR003337] (2); HAD-like domain [IPR023214] (1)                                                                                                                                                                                                                                                                                                                                                                                                                                                                                                     | scaffold_1_mRNA_164.1           | C.unshiu_00005_mRNA_65.1    | -                               |







| ID        | Num in <i>C. clementinae</i> | Num in <i>C. uschii</i> | Num in <i>P. trifoliata</i> | Note                                                                                                                                                             | GO                                                                                                                                                                                                                                                                                                                 | InterPro                                                                                                                                                                                                                                                                                                                                                                                                                                     | Members in <i>C. clementinae</i> | Members in <i>C. uschii</i>                       | Members in <i>P. trifoliata</i> |
|-----------|------------------------------|-------------------------|-----------------------------|------------------------------------------------------------------------------------------------------------------------------------------------------------------|--------------------------------------------------------------------------------------------------------------------------------------------------------------------------------------------------------------------------------------------------------------------------------------------------------------------|----------------------------------------------------------------------------------------------------------------------------------------------------------------------------------------------------------------------------------------------------------------------------------------------------------------------------------------------------------------------------------------------------------------------------------------------|----------------------------------|---------------------------------------------------|---------------------------------|
| GF0018835 | 1                            | 2                       | 0                           | Cyclic nucleotide-gated ion channel 1 (3)                                                                                                                        |                                                                                                                                                                                                                                                                                                                    | Cyclic nucleotide-binding domain [IPRO0595] (3); Beta-like jelly roll fold [IPRO14710] (3); Cyclic nucleotide-binding-like [IPRO18490] (3)                                                                                                                                                                                                                                                                                                   | scaffold_9_mRNA_3703.1           | C.uschii_00740_mRNA_6.1.C.uschii_00740_mRNA_9.1   |                                 |
| GF0018605 | 1                            | 2                       | 0                           | Hypothetical protein (3)                                                                                                                                         |                                                                                                                                                                                                                                                                                                                    | Viral movement protein [IPRO28919] (3)                                                                                                                                                                                                                                                                                                                                                                                                       | scaffold_9_mRNA_3352.1           | C.uschii_00017_mRNA_59.1.C.uschii_01110_mRNA_2.1  |                                 |
| GF0018511 | 1                            | 2                       | 0                           | Hypothetical protein (3)                                                                                                                                         |                                                                                                                                                                                                                                                                                                                    |                                                                                                                                                                                                                                                                                                                                                                                                                                              | scaffold_9_mRNA_3128.1           | C.uschii_00577_mRNA_1.1.C.uschii_02129_mRNA_3.1   |                                 |
| GF0018445 | 1                            | 2                       | 0                           | Ozone-responsive stress related protein (2); Hypothetical protein (1)                                                                                            |                                                                                                                                                                                                                                                                                                                    | Protein of unknown function DUF1138 [IPRO09515] (3)                                                                                                                                                                                                                                                                                                                                                                                          | scaffold_9_mRNA_2993.1           | C.uschii_00574_mRNA_14.1.C.uschii_00574_mRNA_3.1  |                                 |
| GF0018443 | 1                            | 2                       | 0                           | DUF642 family protein (3)                                                                                                                                        |                                                                                                                                                                                                                                                                                                                    | Galactose-binding domain-like [IPRO08979] (3); Domain of unknown function DUF642 [IPRO06946] (3)                                                                                                                                                                                                                                                                                                                                             | scaffold_9_mRNA_2989.1           | C.uschii_01689_mRNA_3.1.C.uschii_02440_mRNA_2.1   |                                 |
| GF0018427 | 1                            | 2                       | 0                           | CDP-diacylglycerol-inositol 3-phosphatidylinositol transferase (3)                                                                                               | phospholipid biosynthetic process [GO:0008654 biological_process] (3); membrane [GO:0016020 cellular_component] (3); phosphotransferase activity, for other substituted phosphate groups [GO:0016780 molecular_function] (3)                                                                                       | CDP-diacylglycerol-inositol 3-phosphatidylinositol transferase, eukaryote [IPRO14387] (3); CDP-alcohol phosphatidylinositol transferase [IPRO00462] (3)                                                                                                                                                                                                                                                                                      | scaffold_9_mRNA_2905.1           | C.uschii_00132_mRNA_7.1.C.uschii_02260_mRNA_1.1   |                                 |
| GF0018392 | 1                            | 2                       | 0                           | MuDR family transposase isoform 1 (2); Putative muDR family transposase-like (1)                                                                                 | MuDR family transposase isoform 1 (2); transposase activity [GO:0004803 molecular_function] (3); transposition, DNA-mediated [GO:0006513 biological_process] (3); zinc ion binding [GO:0008270 molecular_function] (1)                                                                                             | MULE transposase domain [IPRO18289] (3); Transposase, MuDR, plant [IPRO04332] (3); Transposase, mutator type [IPRO02107] (3); Zinc finger, SWIM-type [IPRO07527] (1); Zinc finger, BED-type [IPRO03650] (1); Zinc finger, PMZ-type [IPRO06564] (1)                                                                                                                                                                                           | scaffold_9_mRNA_2778.1           | C.uschii_01023_mRNA_1.1.C.uschii_01118_mRNA_1.1   |                                 |
| GF0018373 | 1                            | 2                       | 0                           | Zinc knuckle family protein (3)                                                                                                                                  | zinc ion binding [GO:0008270 molecular_function] (3); nucleic acid binding [GO:0003676 molecular_function] (3)                                                                                                                                                                                                     | Zinc finger, CCHC-type [IPRO01878] (3)                                                                                                                                                                                                                                                                                                                                                                                                       | scaffold_9_mRNA_2717.1           | C.uschii_00292_mRNA_34.1.C.uschii_00324_mRNA_8.1  |                                 |
| GF0018309 | 1                            | 2                       | 0                           | Cytochrome P450 (3)                                                                                                                                              | iron ion binding [GO:0005506 molecular_function] (3); heme binding [GO:0020037 molecular_function] (3); oxidoreductase activity, acting on paired donors, with incorporation or reduction of molecular oxygen [GO:0016705 molecular_function] (3); oxidation-reduction process [GO:0055114 biological_process] (3) | Cytochrome P450, conserved site [IPRO17972] (3); Cytochrome P450, E-class, group 1 [IPRO02401] (3); Cytochrome P450 [IPRO01128] (3)                                                                                                                                                                                                                                                                                                          | scaffold_9_mRNA_2521.1           | C.uschii_00345_mRNA_14.1.C.uschii_01737_mRNA_5.1  |                                 |
| GF0018307 | 1                            | 2                       | 0                           | Hypothetical protein (3)                                                                                                                                         |                                                                                                                                                                                                                                                                                                                    |                                                                                                                                                                                                                                                                                                                                                                                                                                              | scaffold_9_mRNA_2506.1           | C.uschii_00755_mRNA_7.1.C.uschii_01500_mRNA_2.1   |                                 |
| GF0018295 | 1                            | 2                       | 0                           | Hypothetical protein (3)                                                                                                                                         |                                                                                                                                                                                                                                                                                                                    |                                                                                                                                                                                                                                                                                                                                                                                                                                              | scaffold_9_mRNA_2456.1           | C.uschii_00011_mRNA_74.1.C.uschii_02904_mRNA_4.1  |                                 |
| GF0018282 | 1                            | 2                       | 0                           | Hypothetical protein (3)                                                                                                                                         |                                                                                                                                                                                                                                                                                                                    |                                                                                                                                                                                                                                                                                                                                                                                                                                              | scaffold_9_mRNA_2394.1           | C.uschii_01098_mRNA_4.1.C.uschii_01106_mRNA_11.1  |                                 |
| GF0018204 | 1                            | 2                       | 0                           | Hypothetical protein (3)                                                                                                                                         |                                                                                                                                                                                                                                                                                                                    |                                                                                                                                                                                                                                                                                                                                                                                                                                              | scaffold_9_mRNA_2043.1           | C.uschii_00385_mRNA_11.1.C.uschii_01691_mRNA_3.1  |                                 |
| GF0018109 | 1                            | 2                       | 0                           | Hypothetical protein (3)                                                                                                                                         |                                                                                                                                                                                                                                                                                                                    |                                                                                                                                                                                                                                                                                                                                                                                                                                              | scaffold_9_mRNA_1758.1           | C.uschii_00106_mRNA_24.1.C.uschii_00629_mRNA_9.1  |                                 |
| GF0018095 | 1                            | 2                       | 0                           | Hypothetical protein (2); Ta11 non-LTR retroelement protein-like (1)                                                                                             |                                                                                                                                                                                                                                                                                                                    | Domain of unknown function DUF4283 [IPRO25558] (3); Zinc knuckle CX2CX4HX4C [IPRO25836] (1)                                                                                                                                                                                                                                                                                                                                                  | scaffold_9_mRNA_1700.1           | C.uschii_00032_mRNA_42.1.C.uschii_00211_mRNA_14.1 |                                 |
| GF0018085 | 1                            | 2                       | 0                           | Hypothetical protein (2); Far-red impaired responsive 1-like protein (1)                                                                                         | regulation of transcription, DNA-templated [GO:0006355 biological_process] (3)                                                                                                                                                                                                                                     | FAR1 DNA binding domain [IPRO04330] (3); FHY3/FAR1 family [IPRO31052] (3); MULE transposase domain [IPRO18289] (2)                                                                                                                                                                                                                                                                                                                           | scaffold_9_mRNA_1669.1           | C.uschii_00294_mRNA_12.1.C.uschii_01009_mRNA_9.1  |                                 |
| GF0018077 | 1                            | 2                       | 0                           | Transposon protein, putative, unclassified (2); FOG; Transposon-encoded protein 0 with TTA, reverse transcriptase, integrase domains in various combinations (1) | nucleic acid binding [GO:0003676 molecular_function] (3); zinc ion binding [GO:0008270 molecular_function] (3)                                                                                                                                                                                                     | Zinc finger, CCHC-type [IPRO01878] (3)                                                                                                                                                                                                                                                                                                                                                                                                       | scaffold_9_mRNA_1622.1           | C.uschii_00586_mRNA_4.1.C.uschii_01107_mRNA_11.1  |                                 |
| GF0018067 | 1                            | 2                       | 0                           | UBX domain protein (3)                                                                                                                                           | protein binding [GO:0005515 molecular_function] (3)                                                                                                                                                                                                                                                                | UBA-like [IPRO09060] (3); UAS [IPRO06577] (3); Thioredoxin-like fold [IPRO12336] (3); UBX domain [IPRO01012] (2); Ubiquitin-related domain [IPRO29071] (2); UBX domain-containing protein 27 [IPRO17346] (2)                                                                                                                                                                                                                                 | scaffold_9_mRNA_1582.1           | C.uschii_01176_mRNA_7.1.C.uschii_02187_mRNA_2.1   |                                 |
| GF0018057 | 1                            | 2                       | 0                           | Hypothetical protein (3)                                                                                                                                         |                                                                                                                                                                                                                                                                                                                    |                                                                                                                                                                                                                                                                                                                                                                                                                                              | scaffold_9_mRNA_1511.1           | C.uschii_00122_mRNA_19.1.C.uschii_01255_mRNA_9.1  |                                 |
| GF0018052 | 1                            | 2                       | 0                           | Hypothetical protein (2); Monosaccharide transport protein (1)                                                                                                   |                                                                                                                                                                                                                                                                                                                    | MULE transposase domain [IPRO18289] (3)                                                                                                                                                                                                                                                                                                                                                                                                      | scaffold_9_mRNA_1505.1           | C.uschii_00028_mRNA_46.1.C.uschii_00414_mRNA_16.1 |                                 |
| GF0018036 | 1                            | 2                       | 0                           | Putative methyltransferase PMT20 (3)                                                                                                                             | methyltransferase activity [GO:0008168 molecular_function] (3)                                                                                                                                                                                                                                                     | Putative S-adenosyl-L-methionine-dependent methyltransferase [IPRO04159] (3); S-adenosyl-L-methionine-dependent methyltransferase [IPRO29063] (3)                                                                                                                                                                                                                                                                                            | scaffold_9_mRNA_1459.1           | C.uschii_00131_mRNA_9.2.C.uschii_00551_mRNA_8.2   |                                 |
| GF0018011 | 1                            | 2                       | 0                           | Hypothetical protein (3)                                                                                                                                         | protein kinase activity [GO:0004672 molecular_function] (3); protein phosphorylation [GO:0006468 biological_process] (3); ATP binding [GO:0005524 molecular_function] (3)                                                                                                                                          | Protein kinase-like domain [IPRO11009] (3); Protein kinase domain [IPRO00719] (3); Protein kinase, ATP binding site [IPRO17441] (3); Serine-threonine-protein kinase, active site [IPRO08271] (3); Serine-threonine/tyrosine-protein kinase catalytic domain [IPRO01245] (2); Serine-threonine/dual specificity protein kinase, catalytic domain [IPRO02290] (2); Serine-threonine/tyrosine-protein kinase, catalytic domain [IPRO01245] (1) | scaffold_9_mRNA_1363.1           | C.uschii_00057_mRNA_6.1.C.uschii_00344_mRNA_29.1  |                                 |
| GF0018010 | 1                            | 2                       | 0                           | Hypothetical protein (3)                                                                                                                                         | protein binding [GO:0005515 molecular_function] (3)                                                                                                                                                                                                                                                                | PB1 domain [IPRO00270] (3)                                                                                                                                                                                                                                                                                                                                                                                                                   | scaffold_9_mRNA_1362.1           | C.uschii_00057_mRNA_7.1.C.uschii_00344_mRNA_30.1  |                                 |
| GF0017888 | 1                            | 2                       | 0                           | Hypothetical protein (3)                                                                                                                                         |                                                                                                                                                                                                                                                                                                                    |                                                                                                                                                                                                                                                                                                                                                                                                                                              | scaffold_8_mRNA_953.1            | C.uschii_00203_mRNA_4.1.C.uschii_02725_mRNA_4.1   |                                 |
| GF0017883 | 1                            | 2                       | 0                           | Pentatricopeptide (PPR) repeat protein (3)                                                                                                                       | protein binding [GO:0005515 molecular_function] (2)                                                                                                                                                                                                                                                                | Pentatricopeptide repeat [IPRO02885] (3); Tetra- or pentapeptide-like helical domain [IPRO11990] (2)                                                                                                                                                                                                                                                                                                                                         | scaffold_8_mRNA_946.1            | C.uschii_01262_mRNA_1.1.C.uschii_01415_mRNA_3.1   |                                 |
| GF0017849 | 1                            | 2                       | 0                           | Hypothetical protein (3)                                                                                                                                         | calmodulin binding [GO:0005516 molecular_function] (3)                                                                                                                                                                                                                                                             | Calcium-transporting P-type ATPase, N-terminal autoinhibitory domain [IPRO24790] (3)                                                                                                                                                                                                                                                                                                                                                         | scaffold_8_mRNA_877.1            | C.uschii_01185_mRNA_5.1.C.uschii_02065_mRNA_4.1   |                                 |
| GF0017822 | 1                            | 2                       | 0                           | Pectinesterase 31 (3)                                                                                                                                            | cell wall modification [GO:0042545 biological_process] (3); cell wall [GO:0005618 cellular_component] (3); pectinesterase activity [GO:0003059 molecular_function] (3)                                                                                                                                             | Pectin lyase fold/vincetoxin factor [IPRO11050] (3); Pectinesterase, catalytic [IPRO00070] (3); Pectin lyase fold [IPRO12334] (3)                                                                                                                                                                                                                                                                                                            | scaffold_8_mRNA_796.1            | C.uschii_01962_mRNA_1.1.C.uschii_02198_mRNA_1.1   |                                 |
| GF0017803 | 1                            | 2                       | 0                           | Hypothetical protein (3)                                                                                                                                         |                                                                                                                                                                                                                                                                                                                    |                                                                                                                                                                                                                                                                                                                                                                                                                                              | scaffold_8_mRNA_758.1            | C.uschii_00085_mRNA_5.1.C.uschii_02763_mRNA_1.1   |                                 |
| GF0017791 | 1                            | 2                       | 0                           | DUF241 domain protein (3)                                                                                                                                        |                                                                                                                                                                                                                                                                                                                    | Protein of unknown function DUF241, plant [IPRO04320] (3)                                                                                                                                                                                                                                                                                                                                                                                    | scaffold_8_mRNA_72.1             | C.uschii_00041_mRNA_14.1.C.uschii_00041_mRNA_16.1 |                                 |
| GF0017668 | 1                            | 2                       | 0                           | Family protein (2); Hypothetical protein (1)                                                                                                                     |                                                                                                                                                                                                                                                                                                                    | Uncharacterised protein family, basic secretory protein [IPRO07541] (3)                                                                                                                                                                                                                                                                                                                                                                      | scaffold_8_mRNA_398.1            | C.uschii_00363_mRNA_9.1.C.uschii_02320_mRNA_3.1   |                                 |
| GF0017431 | 1                            | 2                       | 0                           | ATP synthase subunit epsilon (3)                                                                                                                                 |                                                                                                                                                                                                                                                                                                                    |                                                                                                                                                                                                                                                                                                                                                                                                                                              | scaffold_8_mRNA_2981.1           | C.uschii_00375_mRNA_17.1.C.uschii_00571_mRNA_5.1  |                                 |
| GF0017430 | 1                            | 2                       | 0                           | Palmitoyltransferase (2); Hypothetical protein (1)                                                                                                               | zinc ion binding [GO:0008270 molecular_function] (2)                                                                                                                                                                                                                                                               | Zinc finger, DHHC-type, palmitoyltransferase [IPRO01594] (2); Palmitoyltransferase, DHHC domain [IPRO01594] (1)                                                                                                                                                                                                                                                                                                                              | scaffold_8_mRNA_2978.1           | C.uschii_00375_mRNA_20.1.C.uschii_00571_mRNA_8.1  |                                 |
| GF0017218 | 1                            | 2                       | 0                           | Hypothetical protein (3)                                                                                                                                         | metabolic process [GO:0008152 biological_process] (1); transferase activity, transferring hexosyl groups [GO:0016758 molecular_function] (1)                                                                                                                                                                       | UDP-glucuronosyl UDP-glucosyltransferase [IPRO02213] (1)                                                                                                                                                                                                                                                                                                                                                                                     | scaffold_8_mRNA_2576.1           | C.uschii_00320_mRNA_24.1.C.uschii_01839_mRNA_1.1  |                                 |
| GF0017200 | 1                            | 2                       | 0                           | Nucleic acid binding / zinc ion binding protein (2); Hypothetical protein (1)                                                                                    | nucleic acid binding [GO:0003676 molecular_function] (1); zinc ion binding [GO:0008270 molecular_function] (1)                                                                                                                                                                                                     | Zinc knuckle CX2CX4HX4C [IPRO25836] (3); Domain of unknown function DUF283 [IPRO25558] (3); Zinc finger, CCHC-type [IPRO01878] (1)                                                                                                                                                                                                                                                                                                           | scaffold_8_mRNA_2543.1           | C.uschii_00055_mRNA_8.1.C.uschii_02387_mRNA_1.1   |                                 |
| GF0017148 | 1                            | 2                       | 0                           | Hypothetical protein (3)                                                                                                                                         |                                                                                                                                                                                                                                                                                                                    |                                                                                                                                                                                                                                                                                                                                                                                                                                              | scaffold_8_mRNA_2380.1           | C.uschii_00479_mRNA_17.1.C.uschii_00894_mRNA_1.1  |                                 |
| GF0017080 | 1                            | 2                       | 0                           | Putative metal tolerance protein 4-like (3)                                                                                                                      | transmembrane transport [GO:0055085 biological_process] (3); integral component of membrane [GO:0016021 cellular_component] (3); cation transmembrane transporter activity [GO:0008324 molecular_function] (3); cation transport [GO:0006812 biological_process] (3)                                               | Cation efflux protein [IPRO02534] (3); Cation efflux protein transmembrane domain [IPRO27469] (2)                                                                                                                                                                                                                                                                                                                                            | scaffold_8_mRNA_2197.1           | C.uschii_00413_mRNA_19.1.C.uschii_01166_mRNA_3.1  |                                 |
| GF0017059 | 1                            | 2                       | 0                           | Ribosomal protein L15 (3)                                                                                                                                        | protein binding [GO:0005515 molecular_function] (1)                                                                                                                                                                                                                                                                | Pentatricopeptide repeat [IPRO02885] (3); Tetra- or pentapeptide-like helical domain [IPRO11990] (1)                                                                                                                                                                                                                                                                                                                                         | scaffold_8_mRNA_2134.1           | C.uschii_00693_mRNA_11.1.C.uschii_00940_mRNA_1.1  |                                 |
| GF0017037 | 1                            | 2                       | 0                           | Hypothetical protein (3)                                                                                                                                         |                                                                                                                                                                                                                                                                                                                    |                                                                                                                                                                                                                                                                                                                                                                                                                                              | scaffold_8_mRNA_2003.1           | C.uschii_00360_mRNA_4.1.C.uschii_01649_mRNA_1.1   |                                 |
| GF0017033 | 1                            | 2                       | 0                           | Hypothetical protein (2); Retrotransposon protein, putative, Ty3-gypsy subclass (1)                                                                              | DNA integration [GO:0015074 biological_process] (2); nucleic acid binding [GO:0003676 molecular_function] (2)                                                                                                                                                                                                      | Ribonuclease H-like domain [IPRO12337] (2); Integrase, catalytic core [IPRO01584] (2); Aspartic peptidase domain [IPRO1109] (1)                                                                                                                                                                                                                                                                                                              | scaffold_8_mRNA_1993.1           | C.uschii_00087_mRNA_24.1.C.uschii_01302_mRNA_6.1  |                                 |
| GF0017029 | 1                            | 2                       | 0                           | Hypothetical protein (3)                                                                                                                                         | aspartic-type endopeptidase activity [GO:0004190 molecular_function] (1); proteolysis [GO:0006508 biological_process] (1)                                                                                                                                                                                          | Aspartic peptidase, active site [IPRO01969] (1); Retropepsin [IPRO18061] (1); Aspartic peptidase domain [IPRO21109] (1)                                                                                                                                                                                                                                                                                                                      | scaffold_8_mRNA_1984.1           | C.uschii_00222_mRNA_6.1.C.uschii_00527_mRNA_26.1  |                                 |
| GF0017026 | 1                            | 2                       | 0                           | Hypothetical protein (3)                                                                                                                                         |                                                                                                                                                                                                                                                                                                                    |                                                                                                                                                                                                                                                                                                                                                                                                                                              | scaffold_8_mRNA_1973.1           | C.uschii_00811_mRNA_4.1.C.uschii_02435_mRNA_2.1   |                                 |
| GF0016998 | 1                            | 2                       | 0                           | Hypothetical protein (3)                                                                                                                                         | proteolysis [GO:0006508 biological_process] (1); aspartic-type endopeptidase activity [GO:0004190 molecular_function] (1)                                                                                                                                                                                          | Aspartic peptidase domain [IPRO21109] (3); Aspartic peptidase, active site [IPRO01969] (1)                                                                                                                                                                                                                                                                                                                                                   | scaffold_8_mRNA_1821.1           | C.uschii_01216_mRNA_5.1.C.uschii_01419_mRNA_5.1   |                                 |

| ID        | Num. in <i>C. celerata</i> | Num. in <i>C. acinosa</i> | Num. in <i>P. trifoliata</i> | Note                                                                                                                   | GO                                                                                                                                                                                                                                                                                                                 | InterPro                                                                                                                                                                                                                                                                                                                                              | Members in <i>C. celerata</i> | Members in <i>C. acinosa</i>                        | Members in <i>P. trifoliata</i> |
|-----------|----------------------------|---------------------------|------------------------------|------------------------------------------------------------------------------------------------------------------------|--------------------------------------------------------------------------------------------------------------------------------------------------------------------------------------------------------------------------------------------------------------------------------------------------------------------|-------------------------------------------------------------------------------------------------------------------------------------------------------------------------------------------------------------------------------------------------------------------------------------------------------------------------------------------------------|-------------------------------|-----------------------------------------------------|---------------------------------|
| GF0016973 | 1                          | 2                         | 0                            | Hypothetical protein (3)                                                                                               |                                                                                                                                                                                                                                                                                                                    | Domain of unknown function DUF4219 [IPR025314] (3)                                                                                                                                                                                                                                                                                                    | scaffold_8_mRNA_1746.1        | C. unshiu_00101_mRNA_39.1,C. unshiu_00213_mRNA_57.1 |                                 |
| GF0016952 | 1                          | 2                         | 0                            | BED zinc finger/AT family dimerization domain (2); Transposable element Ac (1)                                         | protein dimerization activity [GO:0046983 molecular_function] (3); nucleic acid binding [GO:0003676 molecular_function] (3); DNA binding [GO:0003677 molecular_function] (1)                                                                                                                                       | HAT, C-terminal dimerization domain [IPR008906] (3); Ribonuclease H-like domain [IPR012337] (3); HAT-like transposase, RNase-H fold [IPR025252] (1)                                                                                                                                                                                                   | scaffold_8_mRNA_1678.1        | C. unshiu_00321_mRNA_12.1,C. unshiu_01985_mRNA_1.1  |                                 |
| GF0016931 | 1                          | 2                         | 0                            | Hypothetical protein (3)                                                                                               |                                                                                                                                                                                                                                                                                                                    |                                                                                                                                                                                                                                                                                                                                                       | scaffold_8_mRNA_1505.1        | C. unshiu_00177_mRNA_33.1,C. unshiu_01030_mRNA_15.1 |                                 |
| GF0016929 | 1                          | 2                         | 0                            | Hydroxyproline-rich glycoprotein family protein, putative (3)                                                          |                                                                                                                                                                                                                                                                                                                    |                                                                                                                                                                                                                                                                                                                                                       | scaffold_8_mRNA_1502.1        | C. unshiu_01051_mRNA_21.1,C. unshiu_02832_mRNA_2.1  |                                 |
| GF0016907 | 1                          | 2                         | 0                            | Hypothetical protein (3)                                                                                               |                                                                                                                                                                                                                                                                                                                    |                                                                                                                                                                                                                                                                                                                                                       | scaffold_8_mRNA_1381.1        | C. unshiu_00244_mRNA_7.1,C. unshiu_01081_mRNA_1.1   |                                 |
| GF0016906 | 1                          | 2                         | 0                            | Hypothetical protein (3)                                                                                               |                                                                                                                                                                                                                                                                                                                    |                                                                                                                                                                                                                                                                                                                                                       | scaffold_8_mRNA_1365.1        | C. unshiu_00244_mRNA_2.1,C. unshiu_01081_mRNA_5.1   |                                 |
| GF0016890 | 1                          | 2                         | 0                            | Hypothetical protein (3)                                                                                               |                                                                                                                                                                                                                                                                                                                    | HAD-like domain [IPR023214] (3); FCP1 homology domain [IPR004274] (3)                                                                                                                                                                                                                                                                                 | scaffold_8_mRNA_1310.1        | C. unshiu_00859_mRNA_11.1,C. unshiu_01482_mRNA_3.1  |                                 |
| GF0016882 | 1                          | 2                         | 0                            | Hypothetical protein (3)                                                                                               |                                                                                                                                                                                                                                                                                                                    |                                                                                                                                                                                                                                                                                                                                                       | scaffold_8_mRNA_1260.1        | C. unshiu_02076_mRNA_2.1,C. unshiu_02519_mRNA_1.1   |                                 |
| GF0016872 | 1                          | 2                         | 0                            | Lectin (3)                                                                                                             | carbohydrate binding [GO:0030246 molecular_function] (3)                                                                                                                                                                                                                                                           | Legume lectin, alpha chain, conserved site [IPR008953] (3); Legume lectin domain [IPR011220] (3); Concanavalin A-like lectin/glucanase domain [IPR013320] (3); Legume lectin [IPR016363] (1); Lectin [IPR016363] (1)                                                                                                                                  | scaffold_8_mRNA_1218.1        | C. unshiu_00694_mRNA_15.1,C. unshiu_00694_mRNA_16.1 |                                 |
| GF0016869 | 1                          | 2                         | 0                            | Sodium/hydrogen antiporter 1 isoform 1 (3)                                                                             | transmembrane transport [GO:0055085 biological_process] (3); integral component of membrane [GO:0016021 cellular_component] (3)                                                                                                                                                                                    | Citrate transporter-like domain [IPR004680] (3)                                                                                                                                                                                                                                                                                                       | scaffold_8_mRNA_1207.1        | C. unshiu_01085_mRNA_8.1,C. unshiu_02035_mRNA_3.1   |                                 |
| GF0016864 | 1                          | 2                         | 0                            | Geraniol 10-hydroxylase (1); Bergamotene oxidase (1); TSA; Wollemia nobilis transcribed RNA sequence (1)               | oxidoreductase activity, acting on paired donors, with incorporation or reduction of molecular oxygen [GO:0016705 molecular_function] (3); oxidation-reduction process [GO:0055114 biological_process] (3); iron ion binding [GO:0005506 molecular_function] (3); heme binding [GO:0020037 molecular_function] (3) | Cytochrome P450 [IPR001128] (3); Cytochrome P450, E-class, group I [IPR024011] (1); Reverse transcriptase zinc-binding domain [IPR029660] (1)                                                                                                                                                                                                         | scaffold_8_mRNA_1174.1        | C. unshiu_00617_mRNA_16.1,C. unshiu_01730_mRNA_7.1  |                                 |
| GF0016832 | 1                          | 2                         | 0                            | Auxin-induced protein X10A (2); Auxin-induced protein 10A5 (1)                                                         | response to auxin [GO:0009733 biological_process] (3)                                                                                                                                                                                                                                                              | Small auxin-up RNA [IPR003676] (3)                                                                                                                                                                                                                                                                                                                    | scaffold_8_mRNA_1083.1        | C. unshiu_00396_mRNA_28.1,C. unshiu_00649_mRNA_9.1  |                                 |
| GF0016822 | 1                          | 2                         | 0                            | Auxin-induced protein X10A (3)                                                                                         | response to auxin [GO:0009733 biological_process] (3)                                                                                                                                                                                                                                                              | Small auxin-up RNA [IPR003676] (3)                                                                                                                                                                                                                                                                                                                    | scaffold_8_mRNA_1041.1        | C. unshiu_00649_mRNA_16.1,C. unshiu_01573_mRNA_13.1 |                                 |
| GF0016818 | 1                          | 2                         | 0                            | Retrosposon gag protein (2); Hypothetical protein (1)                                                                  |                                                                                                                                                                                                                                                                                                                    | Retrosposon gag domain [IPR005162] (3)                                                                                                                                                                                                                                                                                                                | scaffold_8_mRNA_1035.1        | C. unshiu_00956_mRNA_11.1,C. unshiu_01859_mRNA_3.1  |                                 |
| GF0016815 | 1                          | 2                         | 0                            | Hypothetical protein (3)                                                                                               |                                                                                                                                                                                                                                                                                                                    | PN domain-like [IPR020660] (2); Phosphoribosyltransferase-like [IPR029057] (1); NYN domain, linkain-b1-type [IPR021139] (1)                                                                                                                                                                                                                           | scaffold_8_mRNA_1025.1        | C. unshiu_00455_mRNA_3.1,C. unshiu_02125_mRNA_2.1   |                                 |
| GF0016764 | 1                          | 2                         | 0                            | Hypothetical protein (3)                                                                                               | peptide-methionine (R)-S-oxide reductase activity [GO:0037343 molecular_function] (2); oxidation-reduction process [GO:0055114 biological_process] (2)                                                                                                                                                             | Mso4-like [IPR011057] (3); Peptide methionine sulphoxide reductase MesB [IPR002579] (2)                                                                                                                                                                                                                                                               | scaffold_7_mRNA_91.1          | C. unshiu_00488_mRNA_3.1,C. unshiu_01559_mRNA_9.1   |                                 |
| GF0016751 | 1                          | 2                         | 0                            | Prenylated rab acceptor family protein (3)                                                                             |                                                                                                                                                                                                                                                                                                                    | Prenylated rab acceptor PRA1 [IPR004895] (3)                                                                                                                                                                                                                                                                                                          | scaffold_7_mRNA_884.1         | C. unshiu_00437_mRNA_2.1,C. unshiu_00726_mRNA_12.1  |                                 |
| GF0016658 | 1                          | 2                         | 0                            | Hydroxyproline-rich glycoprotein family protein, putative (3)                                                          |                                                                                                                                                                                                                                                                                                                    |                                                                                                                                                                                                                                                                                                                                                       | scaffold_7_mRNA_720.1         | C. unshiu_00288_mRNA_25.1,C. unshiu_02333_mRNA_5.1  |                                 |
| GF0016616 | 1                          | 2                         | 0                            | Protein RMD5 like A (3)                                                                                                | protein binding [GO:0005515 molecular_function] (3); zinc ion binding [GO:0008270 molecular_function] (3)                                                                                                                                                                                                          | RING-type zinc-finger, LisH dimerization motif [IPR027370] (3); CTLH-CRA C-terminal to LisH motif domain [IPR024964] (3); Zinc finger, RING-type [IPR018411] (3); Zinc finger, RING-FYVE/PHD-type [IPR013083] (3); CTLH, C-terminal LisH motif [IPR006951] (3); CRA domain [IPR013144] (3); LIS1 homology motif [IPR006594] (3); Rmt5 [IPR027711] (2) | scaffold_7_mRNA_660.1         | C. unshiu_00764_mRNA_7.1,C. unshiu_02109_mRNA_2.1   |                                 |
| GF0016568 | 1                          | 2                         | 0                            | Glycosyl hydrolase family 43 protein (3)                                                                               | hydrolase activity, hydrolyzing O-glycosyl compounds [GO:0004553 molecular_function] (3); carbohydrate metabolic process [GO:0005975 biological_process] (3)                                                                                                                                                       | Glycoside hydrolase, family 43 [IPR006710] (3); Glycosyl hydrolase, five-bladed beta-propeller domain [IPR023296] (3)                                                                                                                                                                                                                                 | scaffold_7_mRNA_598.1         | C. unshiu_00510_mRNA_27.1,C. unshiu_01220_mRNA_12.1 |                                 |
| GF0016546 | 1                          | 2                         | 0                            | AT4g04660 protein (2); Hypothetical protein (1)                                                                        | zinc ion binding [GO:0008270 molecular_function] (3); nucleic acid binding [GO:0003676 molecular_function] (3)                                                                                                                                                                                                     | Zinc finger, CCHC-type [IPR001878] (3); Zinc knuckle CXX2YKRAE [IPR025836] (3); Domain of unknown function DUF4283 [IPR025558] (3)                                                                                                                                                                                                                    | scaffold_7_mRNA_572.1         | C. unshiu_00136_mRNA_36.1,C. unshiu_02688_mRNA_1.1  |                                 |
| GF0016507 | 1                          | 2                         | 0                            | Polypeptide with an integrase domain (1); Hypothetical protein (1); Potato DNA for copia-like transposable element (1) | nucleic acid binding [GO:0003676 molecular_function] (3); DNA integration [GO:0015074 biological_process] (3)                                                                                                                                                                                                      | Ribonuclease H-like domain [IPR012337] (3); Integrase, catalytic core [IPR01584] (3); Reverse transcriptase, RNA-dependent DNA polymerase [IPR013103] (1)                                                                                                                                                                                             | scaffold_7_mRNA_513.1         | C. unshiu_00202_mRNA_2.1,C. unshiu_02229_mRNA_1.1   |                                 |
| GF0016446 | 1                          | 2                         | 0                            | Reticulon-like protein B13 (3)                                                                                         |                                                                                                                                                                                                                                                                                                                    | Reticulon [IPR003388] (3)                                                                                                                                                                                                                                                                                                                             | scaffold_7_mRNA_408.1         | C. unshiu_01032_mRNA_10.1,C. unshiu_01066_mRNA_7.1  |                                 |
| GF0016443 | 1                          | 2                         | 0                            | Methyl esterase 1 (3)                                                                                                  |                                                                                                                                                                                                                                                                                                                    | Alpha/Beta hydrolase fold [IPR029058] (3); Alpha/beta hydrolase fold-1 [IPR000731] (3)                                                                                                                                                                                                                                                                | scaffold_7_mRNA_399.1         | C. unshiu_00025_mRNA_93.2,C. unshiu_01066_mRNA_2.2  |                                 |
| GF0016347 | 1                          | 2                         | 0                            | T-complex protein 1 subunit gamma (2); TCP-1/cpn60 chaperonin family protein (1)                                       | ATP binding [GO:0005524 molecular_function] (3); unfolded protein binding [GO:0051082 molecular_function] (2); protein folding [GO:0006457 biological_process] (2)                                                                                                                                                 | (2); T-complex protein 1, gamma subunit [IPR012719] (2); Chaperone tailless complex polypeptide 1 (TCP-1) [IPR017998] (3); Chaperonin TCP-1, conserved site [IPR002194] (2); TCP-1-like chaperonin intermediate domain [IPR027410] (1)                                                                                                                | scaffold_7_mRNA_2726.1        | C. unshiu_00001_mRNA_404.1,C. unshiu_02885_mRNA_1.1 |                                 |
| GF0016280 | 1                          | 2                         | 0                            | BZIP transcription factor (2); BZIP transcription factor bZIP24 (1)                                                    | regulation of transcription, DNA-templated [GO:0006355 biological_process] (3); sequence-specific DNA binding [GO:0004356 molecular_function] (3); transcription factor activity, sequence-specific DNA binding [GO:0003700 molecular_function] (3)                                                                | Basic-leucine zipper domain [IPR004827] (3)                                                                                                                                                                                                                                                                                                           | scaffold_7_mRNA_256.1         | C. unshiu_00209_mRNA_31.1,C. unshiu_02267_mRNA_2.1  |                                 |
| GF0016261 | 1                          | 2                         | 0                            | Hypothetical protein (2); Disease resistance protein family, putative (1)                                              | ADP binding [GO:0043531 molecular_function] (1)                                                                                                                                                                                                                                                                    | Leucine-rich repeat domain, I domain-like [IPR032675] (3); Winged helix-tandem helix DNA-binding domain [IPR011991] (1); P-loop containing nucleoside triphosphate hydrolase [IPR027417] (1); NB-ARC [IPR002182] (1)                                                                                                                                  | scaffold_7_mRNA_2488.1        | C. unshiu_02139_mRNA_1.1,C. unshiu_02824_mRNA_1.1   |                                 |
| GF0016164 | 1                          | 2                         | 0                            | Hypothetical protein (3)                                                                                               | protein phosphorylation [GO:0006468 biological_process] (2); protein kinase activity [GO:0004672 molecular_function] (2); ATP binding [GO:0005524 molecular_function] (1)                                                                                                                                          | Bull-type lectin domain [IPR001480] (3); Protein kinase-like domain [IPR011090] (2); Protein kinase domain [IPR000719] (1); Serine-threonine/tyrosine-protein kinase catalytic domain [IPR001245] (1)                                                                                                                                                 | scaffold_7_mRNA_2225.1        | C. unshiu_00414_mRNA_5.1,C. unshiu_00611_mRNA_2.1   |                                 |
| GF0016162 | 1                          | 2                         | 0                            | Hypothetical protein (3)                                                                                               | metabolic process [GO:0008152 biological_process] (1); transferase activity, transferring hexosyl groups [GO:0016758 molecular_function] (1)                                                                                                                                                                       | UDP-glucuronosyl/UDP-glucosyltransferase [IPR002213] (1)                                                                                                                                                                                                                                                                                              | scaffold_7_mRNA_2213.1        | C. unshiu_00040_mRNA_78.1,C. unshiu_00611_mRNA_16.1 |                                 |
| GF0016089 | 1                          | 2                         | 0                            | H-like superfamily protein (1); Putative non-LTR retroelement reverse transcriptase (1); Hypothetical protein (1)      | nucleic acid binding [GO:0003676 molecular_function] (2)                                                                                                                                                                                                                                                           | Ribonuclease H-like domain [IPR012337] (2)                                                                                                                                                                                                                                                                                                            | scaffold_7_mRNA_2021.1        | C. unshiu_00508_mRNA_3.1,C. unshiu_02073_mRNA_3.1   |                                 |
| GF0016061 | 1                          | 2                         | 0                            | Hypothetical protein (3)                                                                                               |                                                                                                                                                                                                                                                                                                                    |                                                                                                                                                                                                                                                                                                                                                       | scaffold_7_mRNA_1961.1        | C. unshiu_00448_mRNA_22.1,C. unshiu_02045_mRNA_6.1  |                                 |
| GF0016007 | 1                          | 2                         | 0                            | Hypothetical protein (3)                                                                                               | nucleic acid binding [GO:0003676 molecular_function] (3)                                                                                                                                                                                                                                                           | Ribonuclease H-like domain [IPR012337] (3)                                                                                                                                                                                                                                                                                                            | scaffold_7_mRNA_1806.1        | C. unshiu_00181_mRNA_23.1,C. unshiu_01698_mRNA_6.1  |                                 |
| GF0015997 | 1                          | 2                         | 0                            | Hypothetical protein (2); Phytoalexin receptor (1)                                                                     | protein binding [GO:0005515 molecular_function] (1)                                                                                                                                                                                                                                                                | Leucine-rich repeat-containing N-terminal, plant-type [IPR013210] (3); Leucine-rich repeat domain, L domain-like [IPR032675] (2); Leucine-rich repeat [IPR016111] (1); Leucine-rich repeat, typical subtype [IPR003591] (1)                                                                                                                           | scaffold_7_mRNA_1756.1        | C. unshiu_01401_mRNA_9.1,C. unshiu_02586_mRNA_1.1   |                                 |
| GF0015957 | 1                          | 2                         | 0                            | S locus F-box protein with the low allelic sequence polymorphism 1-S2 (3)                                              | protein binding [GO:0005515 molecular_function] (3)                                                                                                                                                                                                                                                                | F-box associated interaction domain [IPR017451] (3); F-box domain [IPR001810] (3); Ketch-type beta propeller [IPR015915] (1)                                                                                                                                                                                                                          | scaffold_7_mRNA_157.1         | C. unshiu_00073_mRNA_10.1,C. unshiu_02420_mRNA_2.1  |                                 |
| GF0015954 | 1                          | 2                         | 0                            | S locus F-box protein with the low allelic sequence polymorphism 1-S2 (2); Class S F-box protein (1)                   | protein binding [GO:0005515 molecular_function] (3)                                                                                                                                                                                                                                                                | Galactose oxidase/kech, beta-propeller [IPR011043] (3); F-box associated interaction domain [IPR013451] (3); F-box domain [IPR001810] (3); F-box associated domain, type 3 [IPR013187] (3)                                                                                                                                                            | scaffold_7_mRNA_156.1         | C. unshiu_00073_mRNA_9.1,C. unshiu_02420_mRNA_1.1   |                                 |
| GF0015953 | 1                          | 2                         | 0                            | Calkoyl CoA O-methyltransferase (3)                                                                                    | O-methyltransferase activity [GO:0008171 molecular_function] (3)                                                                                                                                                                                                                                                   | O-methyltransferase, family 3 [IPR002953] (3); S-adenosyl-L-methionine-dependent methyltransferase [IPR029063] (3)                                                                                                                                                                                                                                    | scaffold_7_mRNA_1558.1        | C. unshiu_01330_mRNA_7.1,C. unshiu_01330_mRNA_8.2   |                                 |



| ID        | Num. in <i>C. caryophyllata</i> | Num. in <i>C. acutis</i> | Num. in <i>P. trifoliata</i> | Note                                                                                                                                                                   | GO                                                                                                                                                                                                                                                                                                                                                                                                  | InterPro                                                                                                                                                                                                                                                                                                                    | Members in <i>C. caryophyllata</i> | Members in <i>C. acutis</i>                       | Members in <i>P. trifoliata</i> |
|-----------|---------------------------------|--------------------------|------------------------------|------------------------------------------------------------------------------------------------------------------------------------------------------------------------|-----------------------------------------------------------------------------------------------------------------------------------------------------------------------------------------------------------------------------------------------------------------------------------------------------------------------------------------------------------------------------------------------------|-----------------------------------------------------------------------------------------------------------------------------------------------------------------------------------------------------------------------------------------------------------------------------------------------------------------------------|------------------------------------|---------------------------------------------------|---------------------------------|
| GF0013450 | 1                               | 2                        | 0                            | Stearoyl-acyl carrier protein desaturase (3)                                                                                                                           | fatty acid metabolic process [GO:0006031 biological_process] (3); oxidation-reduction process [GO:0055114 biological_process] (3); acyl-acyl-carrier-protein desaturase activity [GO:0045300 molecular_function] (3); oxidoreductase activity [GO:0016491 molecular_function] (2)                                                                                                                   | Fatty acid desaturase, type 2 [IPRO05067] (3); Ferritin-like superfamily [IPRO09078] (3); Ribonucleotide reductase-related [IPRO12348] (2)                                                                                                                                                                                  | scaffold_5_mRNA_3940.1             | C.usshii_00447_mRNA_24.1.C.usshii_02182_mRNA_3.1  |                                 |
| GF0013449 | 1                               | 2                        | 0                            | Eukaryotic translation initiation factor 5B (2); Translation initiation factor IF-2, putative (1)                                                                      | GTP binding [GO:0005525 molecular_function] (2); GTPase activity [GO:0003924 molecular_function] (2)                                                                                                                                                                                                                                                                                                | Translation protein, beta-barrel domain [IPRO09000] (3); P-loop containing nucleoside triphosphate hydrolase [IPRO27417] (3); Translation initiation factor IF-2, domain 3 [IPRO23151] (3); Small GTP-binding protein domain [IPRO05225] (2); Transcription factor, GTP-binding domain [IPRO00795] (2)                      | scaffold_5_mRNA_3937.1             | C.usshii_00447_mRNA_21.1.C.usshii_02182_mRNA_7.1  |                                 |
| GF0013329 | 1                               | 2                        | 0                            | Putative retroelement pol polyprotein (2); Hypothetical protein (1)                                                                                                    |                                                                                                                                                                                                                                                                                                                                                                                                     |                                                                                                                                                                                                                                                                                                                             | scaffold_5_mRNA_371.1              | C.usshii_00328_mRNA_5.1.C.usshii_01324_mRNA_3.1   |                                 |
| GF0013307 | 1                               | 2                        | 0                            | Hypothetical protein (2); Phosphoprotein phosphatase (1)                                                                                                               | ADP binding [GO:0044533 molecular_function] (1)                                                                                                                                                                                                                                                                                                                                                     | Leucine-rich repeat domain, L domain-like [IPRO26751] (3); NB-ARC [IPRO21821] (2); P-loop containing nucleoside triphosphate hydrolase [IPRO27417] (1)                                                                                                                                                                      | scaffold_5_mRNA_3647.1             | C.usshii_00453_mRNA_21.1.C.usshii_00453_mRNA_28.1 |                                 |
| GF0013286 | 1                               | 2                        | 0                            | Hypothetical protein (3)                                                                                                                                               |                                                                                                                                                                                                                                                                                                                                                                                                     |                                                                                                                                                                                                                                                                                                                             | scaffold_5_mRNA_3575.1             | C.usshii_00244_mRNA_16.1.C.usshii_00782_mRNA_9.1  |                                 |
| GF0013264 | 1                               | 2                        | 0                            | Hypothetical protein (3)                                                                                                                                               |                                                                                                                                                                                                                                                                                                                                                                                                     |                                                                                                                                                                                                                                                                                                                             | scaffold_5_mRNA_3447.1             | C.usshii_01332_mRNA_4.1.C.usshii_02372_mRNA_3.1   |                                 |
| GF0013257 | 1                               | 2                        | 0                            | Hypothetical protein (3)                                                                                                                                               |                                                                                                                                                                                                                                                                                                                                                                                                     |                                                                                                                                                                                                                                                                                                                             | scaffold_5_mRNA_3433.1             | C.usshii_00269_mRNA_21.1.C.usshii_00344_mRNA_36.1 |                                 |
| GF0013232 | 1                               | 2                        | 0                            | Ras-related protein Rab11C (1); Hypothetical protein (1); RAB GTPase-like protein B1C (1)                                                                              | GTP binding [GO:0005525 molecular_function] (3); protein transport [GO:0015031 biological_process] (2); signal transduction [GO:0007165 biological_process] (2); small GTPase mediated signal transduction [GO:007264 biological_process] (2); membrane [GO:0016020 cellular_component] (2); GTPase activity [GO:0003924 molecular_function] (1); intracellular [GO:0005622 cellular_component] (1) | Small GTPase superfamily [IPRO01806] (3); P-loop containing nucleoside triphosphate hydrolase [IPRO27417] (3); Small GTPase superfamily, Ras type [IPRO20849] (2); Small GTPase superfamily, Rab type [IPRO03579] (2); Small GTP-binding protein domain [IPRO05225] (1); Small GTPase superfamily, Rho type [IPRO03578] (1) | scaffold_5_mRNA_331.1              | C.usshii_01174_mRNA_6.1.C.usshii_01207_mRNA_2.1   |                                 |
| GF0013218 | 1                               | 2                        | 0                            | GTP-binding protein YPTM2 (1); RAB GTPase-like protein B1C (1); Ras-like GTP-binding protein YPT1 (1)                                                                  | GTP binding [GO:0005525 molecular_function] (3); small GTPase mediated signal transduction [GO:007264 biological_process] (2); membrane [GO:0016020 cellular_component] (2); signal transduction [GO:0007165 biological_process] (2); protein transport [GO:0015031 biological_process] (2); intracellular [GO:0005622 cellular_component] (1); GTPase activity [GO:0003924 molecular_function] (1) | P-loop containing nucleoside triphosphate hydrolase [IPRO27417] (2); Small GTPase superfamily [IPRO01806] (3); Small GTPase superfamily, Ras type [IPRO20849] (2); Small GTPase superfamily, Rab type [IPRO03579] (2); Small GTPase superfamily, Rho type [IPRO03578] (1)                                                   | scaffold_5_mRNA_328.1              | C.usshii_00746_mRNA_7.1.C.usshii_01215_mRNA_14.1  |                                 |
| GF0013185 | 1                               | 2                        | 0                            | Amino acid permease family protein (1); Hypothetical protein (1); Neutral amino acid transporter (1)                                                                   | GTP binding [GO:0005525 molecular_function] (3); amino acid transmembrane transport [GO:0003333 biological_process] (3); membrane [GO:0016020 cellular_component] (3); protein binding [GO:0005515 molecular_function] (1)                                                                                                                                                                          | Amino acid polyamine transporter 1 [IPRO02292] (3); Ankyrin homology (AH) domain/BAR domain [IPRO27267] (1); SH3 domain [IPRO01452] (1)                                                                                                                                                                                     | scaffold_5_mRNA_3172.1             | C.usshii_00809_mRNA_10.1.C.usshii_00961_mRNA_7.1  |                                 |
| GF0013182 | 1                               | 2                        | 0                            | LRR receptor-like serine/threonine-protein kinase GSO1 (3)                                                                                                             | protein binding [GO:0005515 molecular_function] (3)                                                                                                                                                                                                                                                                                                                                                 | Leucine-rich repeat, typical subtype [IPRO03591] (3); Leucine-rich repeat domain, L domain-like [IPRO26751] (3); Leucine-rich repeat [IPRO01611] (3); Leucine-rich repeat-containing N-terminal, plant-type [IPRO13210] (2); SH3 domain [IPRO01452] (1)                                                                     | scaffold_5_mRNA_3122.1             | C.usshii_00888_mRNA_6.1.C.usshii_02001_mRNA_5.1   |                                 |
| GF0013139 | 1                               | 2                        | 0                            | Hypothetical protein (3)                                                                                                                                               | protein binding [GO:0005515 molecular_function] (3)                                                                                                                                                                                                                                                                                                                                                 | Ankyrin repeat-containing domain [IPRO20683] (3); Ankyrin repeat [IPRO02110] (3)                                                                                                                                                                                                                                            | scaffold_5_mRNA_2983.1             | C.usshii_00016_mRNA_3.1.C.usshii_00382_mRNA_1.1   |                                 |
| GF0013039 | 1                               | 2                        | 0                            | Hypothetical protein (3)                                                                                                                                               |                                                                                                                                                                                                                                                                                                                                                                                                     | Retrosposon gag domain [IPRO05162] (1)                                                                                                                                                                                                                                                                                      | scaffold_5_mRNA_2441.1             | C.usshii_01665_mRNA_3.1.C.usshii_01989_mRNA_1.1   |                                 |
| GF0012991 | 1                               | 2                        | 0                            | Hypothetical protein (3)                                                                                                                                               |                                                                                                                                                                                                                                                                                                                                                                                                     | Transposon, En/Spm-like [IPRO04242] (1); Probable transposase, Pta/En/Spm, plant [IPRO04252] (1); Domain of unknown function, DU4216 [IPRO25312] (1)                                                                                                                                                                        | scaffold_5_mRNA_2247.1             | C.usshii_00258_mRNA_1.1.C.usshii_01853_mRNA_4.1   |                                 |
| GF0012988 | 1                               | 2                        | 0                            | Hypothetical protein (3)                                                                                                                                               |                                                                                                                                                                                                                                                                                                                                                                                                     |                                                                                                                                                                                                                                                                                                                             | scaffold_5_mRNA_2224.1             | C.usshii_00111_mRNA_45.1.C.usshii_00464_mRNA_15.1 |                                 |
| GF0012968 | 1                               | 2                        | 0                            | Hypothetical protein (3)                                                                                                                                               |                                                                                                                                                                                                                                                                                                                                                                                                     |                                                                                                                                                                                                                                                                                                                             | scaffold_5_mRNA_2149.1             | C.usshii_01010_mRNA_30.1.C.usshii_00419_mRNA_18.1 |                                 |
| GF0012956 | 1                               | 2                        | 0                            | Hypothetical protein (3)                                                                                                                                               |                                                                                                                                                                                                                                                                                                                                                                                                     |                                                                                                                                                                                                                                                                                                                             | scaffold_5_mRNA_2055.1             | C.usshii_00871_mRNA_22.1.C.usshii_00871_mRNA_33.1 |                                 |
| GF0012926 | 1                               | 2                        | 0                            | Hypothetical protein (3)                                                                                                                                               |                                                                                                                                                                                                                                                                                                                                                                                                     |                                                                                                                                                                                                                                                                                                                             | scaffold_5_mRNA_1937.1             | C.usshii_01068_mRNA_19.1.C.usshii_01974_mRNA_2.1  |                                 |
| GF0012921 | 1                               | 2                        | 0                            | Hypothetical protein (3)                                                                                                                                               |                                                                                                                                                                                                                                                                                                                                                                                                     |                                                                                                                                                                                                                                                                                                                             | scaffold_5_mRNA_1929.1             | C.usshii_01841_mRNA_2.1.C.usshii_02592_mRNA_2.1   |                                 |
| GF0012913 | 1                               | 2                        | 0                            | Hypothetical protein (3)                                                                                                                                               | regulation of transcription, DNA-templated [GO:0006355 biological_process] (3); DNA binding [GO:0003677 molecular_function] (3)                                                                                                                                                                                                                                                                     | NAC domain [IPRO03441] (3)                                                                                                                                                                                                                                                                                                  | scaffold_5_mRNA_1880.1             | C.usshii_00573_mRNA_10.1.C.usshii_00647_mRNA_10.1 |                                 |
| GF0012864 | 1                               | 2                        | 0                            | Hypothetical protein (2); Late embryogenesis abundant hydroxyproline-rich glycoprotein, putative (1)                                                                   |                                                                                                                                                                                                                                                                                                                                                                                                     | Late embryogenesis abundant protein, LEA-14 [IPRO04864] (3); Immunoglobulin-like fold [IPRO13783] (3)                                                                                                                                                                                                                       | scaffold_5_mRNA_1708.1             | C.usshii_00202_mRNA_9.1.C.usshii_01766_mRNA_2.1   |                                 |
| GF0012844 | 1                               | 2                        | 0                            | Hypothetical protein (3)                                                                                                                                               |                                                                                                                                                                                                                                                                                                                                                                                                     |                                                                                                                                                                                                                                                                                                                             | scaffold_5_mRNA_1583.1             | C.usshii_00174_mRNA_46.1.C.usshii_02392_mRNA_2.1  |                                 |
| GF0012842 | 1                               | 2                        | 0                            | Hypothetical protein (3)                                                                                                                                               |                                                                                                                                                                                                                                                                                                                                                                                                     |                                                                                                                                                                                                                                                                                                                             | scaffold_5_mRNA_1538.1             | C.usshii_00128_mRNA_16.1.C.usshii_01666_mRNA_5.1  |                                 |
| GF0012830 | 1                               | 2                        | 0                            | Peroxidase 2 (3)                                                                                                                                                       | peroxidase activity [GO:0004601 molecular_function] (3); oxidation-reduction process [GO:0055114 biological_process] (3); heme binding [GO:0020037 molecular_function] (3); response to oxidative stress [GO:0006979 biological_process] (3); hydrogen peroxide catabolic process [GO:0042744 biological_process] (1)                                                                               | Haem peroxidase [IPRO10255] (3); Peroxidase, active site [IPRO19794] (3); Peroxidase haem-ligand binding site [IPRO19793] (3); Plant peroxidase [IPRO00823] (3); Haem peroxidase, plant/fungal/bacterial [IPRO02016] (3); Secretory peroxidase [IPRO03905] (1)                                                              | scaffold_5_mRNA_1449.2             | C.usshii_00530_mRNA_2.1.C.usshii_00678_mRNA_16.1  |                                 |
| GF0012806 | 1                               | 2                        | 0                            | Hypothetical protein (3)                                                                                                                                               |                                                                                                                                                                                                                                                                                                                                                                                                     |                                                                                                                                                                                                                                                                                                                             | scaffold_5_mRNA_1364.1             | C.usshii_01675_mRNA_5.1.C.usshii_01952_mRNA_2.1   |                                 |
| GF0012781 | 1                               | 2                        | 0                            | Hypothetical protein (3)                                                                                                                                               |                                                                                                                                                                                                                                                                                                                                                                                                     | Retrosposon gag domain [IPRO05162] (2)                                                                                                                                                                                                                                                                                      | scaffold_5_mRNA_1262.1             | C.usshii_00340_mRNA_14.1.C.usshii_00444_mRNA_10.1 |                                 |
| GF0012776 | 1                               | 2                        | 0                            | Hypothetical protein (3)                                                                                                                                               |                                                                                                                                                                                                                                                                                                                                                                                                     |                                                                                                                                                                                                                                                                                                                             | scaffold_5_mRNA_1227.1             | C.usshii_01048_mRNA_3.1.C.usshii_01401_mRNA_4.1   |                                 |
| GF0012775 | 1                               | 2                        | 0                            | Hypothetical protein (3)                                                                                                                                               |                                                                                                                                                                                                                                                                                                                                                                                                     |                                                                                                                                                                                                                                                                                                                             | scaffold_5_mRNA_1224.1             | C.usshii_00160_mRNA_13.1.C.usshii_00160_mRNA_14.1 |                                 |
| GF0012768 | 1                               | 2                        | 0                            | NB-ARC domain disease resistance protein (1); NB-ARC domain-containing disease resistance protein (1); LRR and NB-ARC domain-containing disease resistance protein (1) | ADP binding [GO:0044533 molecular_function] (3)                                                                                                                                                                                                                                                                                                                                                     | P-loop containing nucleoside triphosphate hydrolase [IPRO27417] (3); NB-ARC [IPRO02182] (3); Leucine-rich repeat domain, L domain-like [IPRO26751] (2)                                                                                                                                                                      | scaffold_5_mRNA_113.1              | C.usshii_00019_mRNA_5.1.C.usshii_00904_mRNA_4.1   |                                 |
| GF0012759 | 1                               | 2                        | 0                            | Hypothetical protein (3)                                                                                                                                               | terpene synthase activity [GO:0010333 molecular_function] (3); lyase activity [GO:0016529 molecular_function] (3); metabolic process [GO:0008152 biological_process] (3); nucleic acid binding [GO:0003676 molecular_function] (1)                                                                                                                                                                  | Terpene synthase, N-terminal domain [IPRO01906] (3); Terpenoid cyclase/protein prenyltransferase alpha-alpha toroid [IPRO09300] (3); Ribonuclease H-like domain [IPRO12337] (1)                                                                                                                                             | scaffold_5_mRNA_1099.1             | C.usshii_00825_mRNA_5.1.C.usshii_01139_mRNA_2.1   |                                 |
| GF0012754 | 1                               | 2                        | 0                            | Hypothetical protein (3)                                                                                                                                               |                                                                                                                                                                                                                                                                                                                                                                                                     |                                                                                                                                                                                                                                                                                                                             | scaffold_5_mRNA_1076.1             | C.usshii_00240_mRNA_16.1.C.usshii_00685_mRNA_2.1  |                                 |
| GF0012747 | 1                               | 2                        | 0                            | Hypothetical protein (2); Putative Ty3-gypsy-like retroelement pol polyprotein (1)                                                                                     | DNA integration [GO:0015074 biological_process] (1); nucleic acid binding [GO:0003676 molecular_function] (1)                                                                                                                                                                                                                                                                                       | Integrase, catalytic core [IPRO01584] (1); Ribonuclease H-like domain [IPRO12337] (1)                                                                                                                                                                                                                                       | scaffold_5_mRNA_1053.1             | C.usshii_01148_mRNA_3.1.C.usshii_01624_mRNA_1.1   |                                 |
| GF0012740 | 1                               | 2                        | 0                            | Hypothetical protein (3)                                                                                                                                               |                                                                                                                                                                                                                                                                                                                                                                                                     | Gag-polypeptide of LTR copia-type [IPRO29472] (2)                                                                                                                                                                                                                                                                           | scaffold_5_mRNA_1033.1             | C.usshii_00091_mRNA_10.1.C.usshii_01351_mRNA_4.1  |                                 |
| GF0012727 | 1                               | 2                        | 0                            | Hypothetical protein (3)                                                                                                                                               |                                                                                                                                                                                                                                                                                                                                                                                                     |                                                                                                                                                                                                                                                                                                                             | scaffold_4_mRNA_963.1              | C.usshii_01776_mRNA_3.1.C.usshii_02475_mRNA_1.1   |                                 |
| GF0012662 | 1                               | 2                        | 0                            | Transducin wd40 repeat-like superfamily protein (3)                                                                                                                    | zinc ion binding [GO:0008270 molecular_function] (3); nucleic acid binding [GO:0003676 molecular_function] (3)                                                                                                                                                                                                                                                                                      | Zinc finger, CCHC-type [IPRO01878] (3)                                                                                                                                                                                                                                                                                      | scaffold_4_mRNA_847.1              | C.usshii_00169_mRNA_9.1.C.usshii_00202_mRNA_5.1   |                                 |
| GF0012602 | 1                               | 2                        | 0                            | Hypothetical protein (3)                                                                                                                                               |                                                                                                                                                                                                                                                                                                                                                                                                     | TB2/TP1/HVA22-related protein [IPRO04345] (3); Leucine-rich repeat domain, L domain-like [IPRO26751] (1)                                                                                                                                                                                                                    | scaffold_4_mRNA_664.1              | C.usshii_01019_mRNA_10.1.C.usshii_02720_mRNA_2.1  |                                 |
| GF0012574 | 1                               | 2                        | 0                            | Hypothetical protein (3)                                                                                                                                               |                                                                                                                                                                                                                                                                                                                                                                                                     |                                                                                                                                                                                                                                                                                                                             | scaffold_4_mRNA_571.1              | C.usshii_00141_mRNA_54.1.C.usshii_01045_mRNA_12.1 |                                 |



| ID        | Num. in <i>C. clementinae</i> | Num. in <i>C. acutis</i> | Num. in <i>P. trifoliata</i> | Note                                                                                                                   | GO                                                                                                                                                                                                                                   | InterPro                                                                                                                                                                                                                                                                                    | Members in <i>C. clementinae</i> | Members in <i>C. acutis</i>                         | Members in <i>P. trifoliata</i> |
|-----------|-------------------------------|--------------------------|------------------------------|------------------------------------------------------------------------------------------------------------------------|--------------------------------------------------------------------------------------------------------------------------------------------------------------------------------------------------------------------------------------|---------------------------------------------------------------------------------------------------------------------------------------------------------------------------------------------------------------------------------------------------------------------------------------------|----------------------------------|-----------------------------------------------------|---------------------------------|
| GF000931  | 1                             | 2                        | 0                            | Hypothetical protein (3)                                                                                               |                                                                                                                                                                                                                                      | Alpha/Beta hydrolase fold [IPR029058] (3)                                                                                                                                                                                                                                                   | scaffold_3_mRNA_2930.1           | C. unshii_01034_mRNA_3.1.1.C_unshii_01094_mRNA_7.1  |                                 |
| GF0009320 | 1                             | 2                        | 0                            | NB-ARC domain disease resistance protein (2); TIR-NBS-LRR class disease resistance protein (1)                         | ADP binding [GO:0043531] (3); protein binding [GO:0005515] (3)                                                                                                                                                                       | Winged helix-turn-helix DNA-binding domain [IPR011991] (3); NB-ARC [IPR02182] (3); P-loop containing nucleoside triphosphate hydrolase [IPR027417] (3); Leucine-rich repeat 3 [IPR011713] (1)                                                                                               | scaffold_3_mRNA_2898.1           | C. unshii_01094_mRNA_9.1.1.C_unshii_03116_mRNA_1.1  |                                 |
| GF0009257 | 1                             | 2                        | 0                            | TMV resistance protein N (2); Hypothetical protein (1)                                                                 | signal transduction [GO:0007165] (3); protein binding [GO:0005515] (3); regulation of salicylic acid mediated signaling pathway [GO:2000031] (1); protein kinase activity [GO:0004672] (1); protein phosphorylation [GO:0006468] (1) | Toll/interleukin-1 receptor homology (TIR) domain [IPR000157] (3)                                                                                                                                                                                                                           | scaffold_3_mRNA_2670.1           | C. unshii_00272_mRNA_26.1.C_unshii_01111_mRNA_10.1  |                                 |
| GF0009255 | 1                             | 2                        | 0                            | Ankyrin repeat family protein, putative (3)                                                                            | regulation of defense response [GO:0031347] (1); cellular response to salicylic acid stimulus [GO:0071446] (1); integral component of membrane [GO:0016021] (1); cellular component (1)                                              | Ankyrin repeat-containing domain [IPR020683] (3); Ankyrin repeat [IPR002110] (3); Protein accelerated cell death 6 [IPR032846] (1)                                                                                                                                                          | scaffold_3_mRNA_2661.1           | C. unshii_00828_mRNA_12.1.C_unshii_02556_mRNA_1.1   |                                 |
| GF0009243 | 1                             | 2                        | 0                            | AT4G00440 protein (3)                                                                                                  |                                                                                                                                                                                                                                      | Domain of unknown function DUF4378 [IPR025486] (3); Domain of unknown function DUF3741 [IPR02212] (3); Complex 1 LYR protein [IPR08011] (3); LYR motif-containing protein 2 [IPR028688] (3)                                                                                                 | scaffold_3_mRNA_262.1            | C. unshii_00534_mRNA_4.1.C_unshii_01077_mRNA_11.1   |                                 |
| GF0009232 | 1                             | 2                        | 0                            | LYR family of Fe/S cluster biogenesis protein isoform 1 (3)                                                            |                                                                                                                                                                                                                                      |                                                                                                                                                                                                                                                                                             | scaffold_3_mRNA_2580.1           | C. unshii_00015_mRNA_11.1.C_unshii_u_00602_mRNA_1.1 |                                 |
| GF0009200 | 1                             | 2                        | 0                            | Hypothetical protein (3)                                                                                               |                                                                                                                                                                                                                                      |                                                                                                                                                                                                                                                                                             | scaffold_3_mRNA_2497.1           | C. unshii_00534_mRNA_15.1.C_unshii_01195_mRNA_7.1   |                                 |
| GF0009186 | 1                             | 2                        | 0                            | TMV resistance protein N (3)                                                                                           | protein binding [GO:0005515] (3); ADP binding [GO:0043531] (3); signal transduction [GO:0007165] (3); ATP binding [GO:000524] (1); protein kinase activity [GO:0004672] (1); protein phosphorylation [GO:0006468] (1)                | Leucine-rich repeat 3 [IPR011713] (2); Winged helix-turn-helix DNA-binding domain [IPR011991] (2); Protein kinase, ATP binding site [IPR017441] (1); Protein kinase domain [IPR000719] (1); Leucine-rich repeat, typical subtype [IPR03591] (1); Protein kinase-like domain [IPR011009] (1) | scaffold_3_mRNA_2433.1           | C. unshii_00476_mRNA_12.1.C_unshii_00956_mRNA_9.1   |                                 |
| GF0009173 | 1                             | 2                        | 0                            | Protein AIG1 (3)                                                                                                       | GTP binding [GO:0005255] (3)                                                                                                                                                                                                         | AG1-type guanine nucleotide-binding (G) domain [IPR06703] (3); P-loop containing nucleoside triphosphate hydrolase [IPR027417] (3)                                                                                                                                                          | scaffold_3_mRNA_2372.1           | C. unshii_00373_mRNA_11.1.C_unshii_00811_mRNA_5.1   |                                 |
| GF0009163 | 1                             | 2                        | 0                            | Transcription termination factor family protein (2); Hypothetical protein (1)                                          | double-stranded DNA binding [GO:0003690] (2); regulation of transcription, DNA-templated [GO:0006355] (2); mitochondrion [GO:0005739] (2); cellular component (2)                                                                    | Mitochondrial transcription termination factor [IPR003690] (2)                                                                                                                                                                                                                              | scaffold_3_mRNA_2344.1           | C. unshii_00625_mRNA_15.1.C_unshii_01853_mRNA_6.1   |                                 |
| GF0009145 | 1                             | 2                        | 0                            | Hypothetical protein (3)                                                                                               |                                                                                                                                                                                                                                      |                                                                                                                                                                                                                                                                                             | scaffold_3_mRNA_2295.1           | C. unshii_00100_mRNA_16.1.C_unshii_00344_mRNA_22.1  |                                 |
| GF0009100 | 1                             | 2                        | 0                            | Hypothetical protein (3)                                                                                               |                                                                                                                                                                                                                                      |                                                                                                                                                                                                                                                                                             | scaffold_3_mRNA_2112.1           | C. unshii_00916_mRNA_13.1.C_unshii_03049_mRNA_1.1   |                                 |
| GF0009058 | 1                             | 2                        | 0                            | Hypothetical protein (3)                                                                                               |                                                                                                                                                                                                                                      |                                                                                                                                                                                                                                                                                             | scaffold_3_mRNA_1949.1           | C. unshii_00100_mRNA_20.1.C_unshii_01666_mRNA_3.1   |                                 |
| GF0009024 | 1                             | 2                        | 0                            | Hypothetical protein (2); Polynucleotidyl transferase, ribonuclease H-like superfamily protein (1)                     | nucleic acid binding [GO:0003676] (3)                                                                                                                                                                                                | Ribonuclease H-like domain [IPR012337] (3)                                                                                                                                                                                                                                                  | scaffold_3_mRNA_1742.1           | C. unshii_00023_mRNA_6.1.C_unshii_00874_mRNA_3.1    |                                 |
| GF0009021 | 1                             | 2                        | 0                            | Hypothetical protein (3)                                                                                               |                                                                                                                                                                                                                                      |                                                                                                                                                                                                                                                                                             | scaffold_3_mRNA_1732.1           | C. unshii_00948_mRNA_12.1.C_unshii_01788_mRNA_4.1   |                                 |
| GF0009020 | 1                             | 2                        | 0                            | Hypothetical protein (3)                                                                                               |                                                                                                                                                                                                                                      | Aspartic peptidase domain [IPR021109] (1)                                                                                                                                                                                                                                                   | scaffold_3_mRNA_1731.1           | C. unshii_00508_mRNA_4.1.C_unshii_01886_mRNA_5.1    |                                 |
| GF0009014 | 1                             | 2                        | 0                            | Hypothetical protein (3)                                                                                               |                                                                                                                                                                                                                                      |                                                                                                                                                                                                                                                                                             | scaffold_3_mRNA_1712.1           | C. unshii_00512_mRNA_10.1.C_unshii_00613_mRNA_10.1  |                                 |
| GF0009013 | 1                             | 2                        | 0                            | Hypothetical protein (3)                                                                                               |                                                                                                                                                                                                                                      |                                                                                                                                                                                                                                                                                             | scaffold_3_mRNA_1704.1           | C. unshii_00542_mRNA_7.1.C_unshii_01834_mRNA_1.1    |                                 |
| GF0009008 | 1                             | 2                        | 0                            | Mitochondrial substrate carrier family protein B (3)                                                                   | transmembrane transport [GO:0055085] (3)                                                                                                                                                                                             | Mitochondrial substrate/solute carrier [IPR018108] (3); Mitochondrial carrier domain [IPR03395] (3); Mitochondrial carrier protein [IPR020067] (3)                                                                                                                                          | scaffold_3_mRNA_168.1            | C. unshii_00495_mRNA_15.1.C_unshii_00609_mRNA_6.1   |                                 |
| GF0009002 | 1                             | 2                        | 0                            | Hypothetical protein (3)                                                                                               |                                                                                                                                                                                                                                      |                                                                                                                                                                                                                                                                                             | scaffold_3_mRNA_166.1            | C. unshii_00609_mRNA_7.1.C_unshii_01000_mRNA_14.1   |                                 |
| GF0008986 | 1                             | 2                        | 0                            | Hypothetical protein (3)                                                                                               |                                                                                                                                                                                                                                      |                                                                                                                                                                                                                                                                                             | scaffold_3_mRNA_1616.1           | C. unshii_00793_mRNA_8.1.C_unshii_02382_mRNA_2.1    |                                 |
| GF0008955 | 1                             | 2                        | 0                            | Hypothetical protein (3)                                                                                               | polysaccharide binding [GO:0030247] (3)                                                                                                                                                                                              | Wall-associated receptor kinase, galacturonin-binding domain [IPR025257] (3)                                                                                                                                                                                                                | scaffold_3_mRNA_1507.1           | C. unshii_01368_mRNA_5.1.C_unshii_02518_mRNA_1.1    |                                 |
| GF0008934 | 1                             | 2                        | 0                            | SFBbeta protein (2); S locus F-box protein with the low allelic sequence polymorphism 1-52 (1)                         | protein binding [GO:0005515] (3)                                                                                                                                                                                                     | F-box associated interaction domain [IPR017451] (3); F-box domain [IPR001810] (3); Galactose oxidase/leish, beta-propeller [IPR011043] (1); F-box associated domain, type 3 [IPR013187] (1)                                                                                                 | scaffold_3_mRNA_1448.1           | C. unshii_00285_mRNA_33.1.C_unshii_01684_mRNA_2.1   |                                 |
| GF0008908 | 1                             | 2                        | 0                            | Hypothetical protein (3)                                                                                               |                                                                                                                                                                                                                                      |                                                                                                                                                                                                                                                                                             | scaffold_3_mRNA_1384.1           | C. unshii_00284_mRNA_26.1.C_unshii_01612_mRNA_5.1   |                                 |
| GF0008829 | 1                             | 2                        | 0                            | Hypothetical protein (3)                                                                                               | nucleic acid binding [GO:0003676] (3); protein processing [GO:0016485] (1)                                                                                                                                                           | Ribonuclease H-like domain [IPR012337] (3)                                                                                                                                                                                                                                                  | scaffold_3_mRNA_1194.1           | C. unshii_00695_mRNA_4.1.C_unshii_00948_mRNA_4.1    |                                 |
| GF0008772 | 1                             | 2                        | 0                            | Presenilin (3)                                                                                                         | protein processing [GO:0016485] (3); aspartic-type endopeptidase activity [GO:0004190] (3); integral component of membrane [GO:0016021] (1); cellular component (1)                                                                  | Presenilin signal peptide peptidase [IPR06659] (3); Peptidase A22A, presenilin [IPR001108] (3)                                                                                                                                                                                              | scaffold_3_mRNA_1101.1           | C. unshii_00154_mRNA_37.1.C_unshii_01729_mRNA_2.1   |                                 |
| GF0008762 | 1                             | 2                        | 0                            | Hypothetical protein (3)                                                                                               | DNA binding [GO:0003677] (3); regulation of transcription, DNA-templated [GO:0006355] (3)                                                                                                                                            | NAC domain [IPR003441] (3)                                                                                                                                                                                                                                                                  | scaffold_3_mRNA_1090.1           | C. unshii_00154_mRNA_48.1.C_unshii_02011_mRNA_2.1   |                                 |
| GF0008669 | 1                             | 2                        | 0                            | Hypothetical protein (3)                                                                                               |                                                                                                                                                                                                                                      |                                                                                                                                                                                                                                                                                             | scaffold_2_mRNA_780.1            | C. unshii_00260_mRNA_20.1.C_unshii_00260_mRNA_32.1  |                                 |
| GF0008380 | 1                             | 2                        | 0                            | Hypothetical protein (3)                                                                                               | cysteine-type peptidase activity [GO:0006234] (1); protein refolding [GO:0040226] (1); proteolysis [GO:0006508] (1); biological process (1)                                                                                          | Domain of unknown function DUF1985 [IPR015410] (2); Ulp1 protease family, C-terminal catalytic domain [IPR003653] (1)                                                                                                                                                                       | scaffold_2_mRNA_457.1            | C. unshii_00147_mRNA_4.1.C_unshii_01757_mRNA_1.1    |                                 |
| GF0007883 | 1                             | 2                        | 0                            | Hypothetical protein (3)                                                                                               |                                                                                                                                                                                                                                      |                                                                                                                                                                                                                                                                                             | scaffold_2_mRNA_3899.1           | C. unshii_00125_mRNA_46.1.C_unshii_00405_mRNA_26.1  |                                 |
| GF0007409 | 1                             | 2                        | 0                            | Hypothetical protein (3)                                                                                               |                                                                                                                                                                                                                                      | Reverse transcriptase zinc-binding domain [IPR026960] (3)                                                                                                                                                                                                                                   | scaffold_2_mRNA_3051.1           | C. unshii_00081_mRNA_74.1.C_unshii_02626_mRNA_2.1   |                                 |
| GF0007408 | 1                             | 2                        | 0                            | Receptor like protein 6 (1); Verticillium wilt disease resistance protein (1); Leucine-rich repeat, plant specific (1) | protein binding [GO:0005515] (3)                                                                                                                                                                                                     | Leucine-rich repeat-containing N-terminal, plant-type [IPR013210] (3); Leucine-rich repeat domain, L domain-like [IPR032675] (3); Leucine-rich repeat [IPR001611] (2)                                                                                                                       | scaffold_2_mRNA_3043.1           | C. unshii_00081_mRNA_71.1.C_unshii_01944_mRNA_1.1   |                                 |
| GF0007315 | 1                             | 2                        | 0                            | Hypothetical protein (3)                                                                                               |                                                                                                                                                                                                                                      |                                                                                                                                                                                                                                                                                             | scaffold_2_mRNA_2851.1           | C. unshii_00142_mRNA_24.1.C_unshii_01808_mRNA_5.1   |                                 |
| GF0007257 | 1                             | 2                        | 0                            | Limonen synthase (3)                                                                                                   | metabolic process [GO:0008152] (3); terpene synthase activity [GO:0010333] (3); lyase activity [GO:0016829] (3); magnesium ion binding [GO:0000287] (3)                                                                              | Isoprenoid synthase domain [IPR008949] (3); Terpenoid cyclase/protein prenyltransferase alpha-alpha teroid [IPR008930] (3); Terpene synthase, N-terminal domain [IPR01906] (3); Terpene synthase, metal-binding domain [IPR06530] (3)                                                       | scaffold_2_mRNA_2700.1           | C. unshii_00663_mRNA_11.1.C_unshii_00663_mRNA_12.1  |                                 |
| GF0007242 | 1                             | 2                        | 0                            | Chaperonin ATPase (3)                                                                                                  | ATP binding [GO:000524] (3); protein refolding [GO:0040226] (2); cytoplasm [GO:0005737] (2); cellular component (2)                                                                                                                  | GroEL-like equatorial domain [IPR027413] (3); GroEL-like apical domain [IPR027409] (3); Chaperonin GroEL/TCP-1 family [IPR04022] (3); TCP-1-like chaperonin intermediate domain [IPR027410] (2); Chaperonin Cpn60 [IPR001844] (2)                                                           | scaffold_2_mRNA_2638.2           | C. unshii_00833_mRNA_12.1.C_unshii_02807_mRNA_2.2   |                                 |
| GF0007231 | 1                             | 2                        | 0                            | Hypothetical protein (3)                                                                                               |                                                                                                                                                                                                                                      |                                                                                                                                                                                                                                                                                             | scaffold_2_mRNA_2570.1           | C. unshii_00953_mRNA_5.1.C_unshii_01401_mRNA_6.1    |                                 |
| GF0007204 | 1                             | 2                        | 0                            | Hypothetical protein (3)                                                                                               |                                                                                                                                                                                                                                      | Retrioxin/oxoninase domain [IPR005162] (2)                                                                                                                                                                                                                                                  | scaffold_2_mRNA_2478.1           | C. unshii_00565_mRNA_4.1.C_unshii_00836_mRNA_5.1    |                                 |
| GF0007192 | 1                             | 2                        | 0                            | Protein phosphatase 1 regulatory subunit pprA (3)                                                                      | protein binding [GO:0005515] (3)                                                                                                                                                                                                     | Leucine-rich repeat [IPR001611] (3); Leucine-rich repeat domain, L domain-like [IPR032675] (3); Leucine-rich repeat, typical subtype [IPR003591] (3); Endonuclease/exonuclease/phosphatase [IPR005135] (2)                                                                                  | scaffold_2_mRNA_2342.1           | C. unshii_01397_mRNA_8.1.C_unshii_01759_mRNA_1.1    |                                 |
| GF0007190 | 1                             | 2                        | 0                            | Hypothetical protein (3)                                                                                               |                                                                                                                                                                                                                                      |                                                                                                                                                                                                                                                                                             | scaffold_2_mRNA_2332.1           | C. unshii_00871_mRNA_15.1.C_unshii_01759_mRNA_4.1   |                                 |
| GF0007124 | 1                             | 2                        | 0                            | Hypothetical protein (3)                                                                                               |                                                                                                                                                                                                                                      |                                                                                                                                                                                                                                                                                             | scaffold_2_mRNA_191.1            | C. unshii_01873_mRNA_9.1.C_unshii_01925_mRNA_8.1    |                                 |
| GF0007113 | 1                             | 2                        | 0                            | Hypothetical protein (3)                                                                                               | nucleic acid binding [GO:0003676] (1)                                                                                                                                                                                                | GAG-pre-integrase domain [IPR025724] (2); Ribonuclease H-like domain [IPR012337] (1); Reverse transcriptase, RNA-dependent DNA polymerase [IPR013103] (1)                                                                                                                                   | scaffold_2_mRNA_1882.1           | C. unshii_00543_mRNA_1.1.C_unshii_02183_mRNA_5.1    |                                 |

| ID        | Num. in <i>C. clementinae</i> | Num. in <i>C. acutis</i> | Num. in <i>P. trifoliata</i> | Note                                                                                                                                              | GO                                                                                                                                                                                                                                                         | InterPro                                                                                                                                                                                                                                                                                                                                                                                                                                                                                                                                                                                                                                                                                                                            | Members in <i>C. clementinae</i> | Members in <i>C. acutis</i>                                                   | Members in <i>P. trifoliata</i> |
|-----------|-------------------------------|--------------------------|------------------------------|---------------------------------------------------------------------------------------------------------------------------------------------------|------------------------------------------------------------------------------------------------------------------------------------------------------------------------------------------------------------------------------------------------------------|-------------------------------------------------------------------------------------------------------------------------------------------------------------------------------------------------------------------------------------------------------------------------------------------------------------------------------------------------------------------------------------------------------------------------------------------------------------------------------------------------------------------------------------------------------------------------------------------------------------------------------------------------------------------------------------------------------------------------------------|----------------------------------|-------------------------------------------------------------------------------|---------------------------------|
| GF0006985 | 1                             | 2                        | 0                            | NADix hydrolase 17, mitochondrial (3)                                                                                                             | hydrolase activity [GO:0016787 molecular_function] (3)                                                                                                                                                                                                     | NUDX hydrolase domain-like [IPR015971] (3); NUDIX hydrolase, conserved site [IPR020084] (3); NUDIX hydrolase domain [IPR000086] (3)                                                                                                                                                                                                                                                                                                                                                                                                                                                                                                                                                                                                 | scaffold_2_mRNA_1517.1           | C.unshii_00653_mRNA_11.1.C.unshii_02017_mRNA_3.1                              |                                 |
| GF0006896 | 1                             | 2                        | 0                            | Ankyrin repeat family protein, putative (3)                                                                                                       | biological_process (1); integral component of membrane [GO:0016021 cellular_component] (1); regulation of salicylic acid mediated signaling pathway [GO:2000031 biological_process] (1); regulation of defense response [GO:001347 biological_process] (1) | PGG domain [IPR020961] (3); Ankyrin repeat-containing domain [IPR020683] (3); Ankyrin repeat [IPR02110] (3); Protein accelerated cell death 6 [IPR02846] (1)                                                                                                                                                                                                                                                                                                                                                                                                                                                                                                                                                                        | scaffold_2_mRNA_1304.1           | C.unshii_00897_mRNA_10.1.C.unshii_01842_mRNA_1.1                              |                                 |
| GF0006851 | 1                             | 2                        | 0                            | Hypothetical protein (3)                                                                                                                          |                                                                                                                                                                                                                                                            |                                                                                                                                                                                                                                                                                                                                                                                                                                                                                                                                                                                                                                                                                                                                     | scaffold_2_mRNA_1236.1           | C.unshii_00049_mRNA_33.1.C.unshii_00049_mRNA_34.1                             |                                 |
| GF0006675 | 1                             | 2                        | 0                            | Hypothetical protein (3)                                                                                                                          |                                                                                                                                                                                                                                                            |                                                                                                                                                                                                                                                                                                                                                                                                                                                                                                                                                                                                                                                                                                                                     | scaffold_1_mRNA_983.1            | C.unshii_00191_mRNA_27.1.C.unshii_01414_mRNA_10.1                             |                                 |
| GF0006640 | 1                             | 2                        | 0                            | Hypothetical protein (3)                                                                                                                          | nucleic acid binding [GO:0003676 molecular_function] (3); protein dimerization activity [GO:0046983 molecular_function] (3)                                                                                                                                | HAT, C-terminal dimerization domain [IPR008906] (3); Ribonuclease H-like domain [IPR012337] (3)                                                                                                                                                                                                                                                                                                                                                                                                                                                                                                                                                                                                                                     | scaffold_1_mRNA_911.1            | C.unshii_00068_mRNA_59.1.C.unshii_00837_mRNA_12.1                             |                                 |
| GF0006558 | 1                             | 2                        | 0                            | Hypothetical protein (2); Transposon protein, putative, unclassified (1)                                                                          | protein binding [GO:0005515 molecular_function] (2)                                                                                                                                                                                                        | Leucine-rich repeat domain, L domain-like [IPR032675] (3); Leucine-rich repeat [IPR01611] (2); Leucine-rich repeat-containing N-terminal, plant-type [IPR013210] (2)                                                                                                                                                                                                                                                                                                                                                                                                                                                                                                                                                                | scaffold_1_mRNA_706.1            | C.unshii_00242_mRNA_1.1.C.unshii_00372_mRNA_3.1                               |                                 |
| GF0006292 | 1                             | 2                        | 0                            | Hypothetical protein (3)                                                                                                                          |                                                                                                                                                                                                                                                            | Zinc finger, CCHC-type [IPR001878] (1); GAG-pre-integrase domain [IPR025724] (1); Ribonuclease H-like domain [IPR012337] (1); Reverse transcriptase, RNA-dependent DNA polymerase [IPR013103] (1)                                                                                                                                                                                                                                                                                                                                                                                                                                                                                                                                   | scaffold_1_mRNA_3546.1           | C.unshii_00305_mRNA_1.1.C.unshii_01994_mRNA_5.1                               |                                 |
| GF0006038 | 1                             | 2                        | 0                            | Cysteine-rich RLK (RECEPTOR-like protein kinase) 8 (2); Pol polyprotein (1)                                                                       | nucleic acid binding [GO:0003676 molecular_function] (2); zinc ion binding [GO:0008270 molecular_function] (1)                                                                                                                                             | Expansion/pollen allergen, DPBB domain [IPR007112] (3); RlpA-like double-psi beta-barrel domain [IPR009009] (2); RlpA-like protein, double-psi beta-barrel domain [IPR009009] (1)                                                                                                                                                                                                                                                                                                                                                                                                                                                                                                                                                   | scaffold_1_mRNA_316.1            | C.unshii_00169_mRNA_11.1.C.unshii_00193_mRNA_12.1                             |                                 |
| GF0005662 | 1                             | 2                        | 0                            | Plant natriuretic peptide A (3)                                                                                                                   |                                                                                                                                                                                                                                                            | Transposase, MuDR, plant [IPR004332] (1)                                                                                                                                                                                                                                                                                                                                                                                                                                                                                                                                                                                                                                                                                            | scaffold_1_mRNA_250.1            | C.unshii_00553_mRNA_1.1.C.unshii_00749_mRNA_15.1                              |                                 |
| GF0005630 | 1                             | 2                        | 0                            | Hypothetical protein (3)                                                                                                                          |                                                                                                                                                                                                                                                            | S-locus receptor kinase, C-terminal [IPR021820] (3); Protein kinase-like domain [IPR011009] (2); Serine/threonine/dual specificity protein kinase, catalytic domain [IPR002290] (1); Serine/threonine-protein kinase, active site [IPR008271] (4); Protein kinase domain [IPR000719] (1)                                                                                                                                                                                                                                                                                                                                                                                                                                            | scaffold_1_mRNA_239.1            | C.unshii_01092_mRNA_2.1.C.unshii_02810_mRNA_2.1                               |                                 |
| GF0005613 | 1                             | 2                        | 0                            | Hypothetical protein (2); Cysteine-rich RLK (Receptor-like kinase) protein (1)                                                                    | protein serine/threonine kinase activity [GO:0004674 molecular_function] (3); ATP binding [GO:0005524 molecular_function] (1); protein phosphorylation [GO:0006468 biological_process] (1); protein kinase activity [GO:0004672 molecular_function] (1)    | Expansion/pollen allergen, DPBB domain [IPR007112] (3); RlpA-like double-psi beta-barrel domain [IPR009009] (2); RlpA-like protein, double-psi beta-barrel domain [IPR009009] (1)                                                                                                                                                                                                                                                                                                                                                                                                                                                                                                                                                   | scaffold_1_mRNA_2312.1           | C.unshii_00054_mRNA_10.1.C.unshii_02084_mRNA_6.1                              |                                 |
| GF0005612 | 1                             | 2                        | 0                            | Hypothetical protein (3)                                                                                                                          |                                                                                                                                                                                                                                                            |                                                                                                                                                                                                                                                                                                                                                                                                                                                                                                                                                                                                                                                                                                                                     | scaffold_1_mRNA_2310.1           | C.unshii_00021_mRNA_12.1.C.unshii_00688_mRNA_15.1                             |                                 |
| GF0005408 | 1                             | 2                        | 0                            | Hypothetical protein (3)                                                                                                                          |                                                                                                                                                                                                                                                            |                                                                                                                                                                                                                                                                                                                                                                                                                                                                                                                                                                                                                                                                                                                                     | scaffold_1_mRNA_1742.1           | C.unshii_00097_mRNA_51.1.C.unshii_00167_mRNA_8.1                              |                                 |
| GF0005359 | 1                             | 2                        | 0                            | Hypothetical protein (3)                                                                                                                          |                                                                                                                                                                                                                                                            |                                                                                                                                                                                                                                                                                                                                                                                                                                                                                                                                                                                                                                                                                                                                     | scaffold_1_mRNA_1599.1           | C.unshii_00558_mRNA_14.1.C.unshii_01614_mRNA_4.1                              |                                 |
| GF0005351 | 1                             | 2                        | 0                            | Cytokinin riboside 5'-monophosphate phosphoribohydrolase (3)                                                                                      |                                                                                                                                                                                                                                                            | LOG family [IPR031100] (3); Cytokinin riboside 5'-monophosphate phosphoribohydrolase LOG [IPR005269] (3)                                                                                                                                                                                                                                                                                                                                                                                                                                                                                                                                                                                                                            | scaffold_1_mRNA_1561.1           | C.unshii_01470_mRNA_6.1.C.unshii_02288_mRNA_3.1                               |                                 |
| GF0005344 | 1                             | 2                        | 0                            | Zinc knuckle family protein (3)                                                                                                                   | zinc ion binding [GO:0008270 molecular_function] (3); nucleic acid binding [GO:0003676 molecular_function] (3)                                                                                                                                             | Zinc finger, CCHC-type [IPR001878] (3); Domain of unknown function DUF4219 [IPR025314] (2)                                                                                                                                                                                                                                                                                                                                                                                                                                                                                                                                                                                                                                          | scaffold_1_mRNA_1547.1           | C.unshii_00890_mRNA_2.1.C.unshii_01153_mRNA_7.1                               |                                 |
| GF0005335 | 1                             | 2                        | 0                            | Hypothetical protein (3)                                                                                                                          |                                                                                                                                                                                                                                                            |                                                                                                                                                                                                                                                                                                                                                                                                                                                                                                                                                                                                                                                                                                                                     | scaffold_1_mRNA_1525.1           | C.unshii_00031_mRNA_33.1.C.unshii_00450_mRNA_2.1                              |                                 |
| GF0005190 | 1                             | 2                        | 0                            | Hypothetical protein (3)                                                                                                                          |                                                                                                                                                                                                                                                            |                                                                                                                                                                                                                                                                                                                                                                                                                                                                                                                                                                                                                                                                                                                                     | scaffold_1_mRNA_1028.1           | C.unshii_00198_mRNA_3.1.C.unshii_01216_mRNA_9.1                               |                                 |
| GF0005077 | 1                             | 3                        | 0                            | Dienelectone hydrolase family, putative (4)                                                                                                       | hydrolase activity [GO:0016787 molecular_function] (4)                                                                                                                                                                                                     | Dienelectone hydrolase [IPR020252] (4); Alpha/Beta hydrolase fold [IPR020058] (4)                                                                                                                                                                                                                                                                                                                                                                                                                                                                                                                                                                                                                                                   | scaffold_9_mRNA_455.1            | C.unshii_00097_mRNA_36.1.C.unshii_01541_mRNA_4.1.C.unshii_01541_mRNA_9.1      |                                 |
| GF0005023 | 1                             | 3                        | 0                            | LRR receptor-like kinase family protein (4)                                                                                                       | protein binding [GO:0005515 molecular_function] (4); protein kinase activity [GO:0004672 molecular_function] (4); protein phosphorylation [GO:0006468 biological_process] (4); ATP binding [GO:0005524 molecular_function] (4)                             | Protein kinase domain [IPR000719] (4); Protein kinase-like domain [IPR011009] (4); Leucine-rich repeat domain, L domain-like [IPR032675] (4); Leucine-rich repeat, typical subtype [IPR003591] (4); Leucine-rich repeat-containing N-terminal, plant-type [IPR013210] (4); Serine/threonine-protein kinase, active site [IPR008271] (4); Protein kinase, ATP binding site [IPR017441] (4); Leucine-rich repeat [IPR01611] (4); Concavalin A-like lectin/glucanase domain [IPR013320] (3); Serine/threonine/dual specificity protein kinase, catalytic domain [IPR002290] (3); Serine/threonine/tyrosine-protein kinase, catalytic domain [IPR001245] (1); Serine/threonine/tyrosine-protein kinase catalytic domain [IPR001245] (1) | scaffold_9_mRNA_2973.1           | C.unshii_00132_mRNA_13.1.C.unshii_00345_mRNA_29.1.C.unshii_01900_mRNA_3.1     |                                 |
| GF0005020 | 1                             | 3                        | 0                            | Hypothetical protein (2); Systemin receptor SR160, putative (2)                                                                                   | protein kinase activity [GO:0004672 molecular_function] (4); protein phosphorylation [GO:0006468 biological_process] (4); ATP binding [GO:0005524 molecular_function] (4)                                                                                  | Serine/threonine-protein kinase, active site [IPR008271] (4); Protein kinase-like domain [IPR011009] (4); Protein kinase domain [IPR000719] (4); Serine/threonine/dual specificity protein kinase, catalytic domain [IPR002290] (3); Serine/threonine/tyrosine-protein kinase, catalytic domain [IPR001245] (1); Leucine-rich repeat domain, L domain-like [IPR032675] (1)                                                                                                                                                                                                                                                                                                                                                          | scaffold_9_mRNA_2964.1           | C.unshii_00095_mRNA_1.1.C.unshii_01005_mRNA_1.1.C.unshii_01821_mRNA_4.1       |                                 |
| GF0005015 | 1                             | 3                        | 0                            | Disease resistance protein (4)                                                                                                                    | protein binding [GO:0005515 molecular_function] (4); ADP binding [GO:0043531 molecular_function] (4)                                                                                                                                                       | Leucine-rich repeat [IPR001611] (4); NB-ARC [IPR002182] (4); P-loop containing nucleoside triphosphate hydrolase [IPR027417] (4); Leucine-rich repeat domain, L domain-like [IPR032675] (4); Winged helix-turn-helix DNA-binding domain [IPR011991] (1); Receptor L-domain [IPR00494] (1)                                                                                                                                                                                                                                                                                                                                                                                                                                           | scaffold_9_mRNA_2906.1           | C.unshii_00478_mRNA_18.1.C.unshii_00478_mRNA_2.1                              |                                 |
| GF0004978 | 1                             | 3                        | 0                            | Hypothetical protein (2); RNA-directed DNA polymerase, related (1); LINE-type retrotransposon Lib DNA, Insertion at the S11 site-like protein (1) | nucleic acid binding [GO:0003676 molecular_function] (2)                                                                                                                                                                                                   | Reverse transcriptase domain [IPR000477] (3); Ribonuclease H-like domain [IPR012337] (2); Endonuclease/exonuclease/phosphatase [IPR005135] (1)                                                                                                                                                                                                                                                                                                                                                                                                                                                                                                                                                                                      | scaffold_9_mRNA_2195.1           | C.unshii_00241_mRNA_21.1.C.unshii_00936_mRNA_17.1.C.unshii_01718_mRNA_1.1     |                                 |
| GF0004976 | 1                             | 3                        | 0                            | Hypothetical protein (3); DUF4283 domain protein (1)                                                                                              |                                                                                                                                                                                                                                                            | Domain of unknown function DUF4283 [IPR025558] (3)                                                                                                                                                                                                                                                                                                                                                                                                                                                                                                                                                                                                                                                                                  | scaffold_9_mRNA_2151.1           | C.unshii_00107_mRNA_44.1.C.unshii_00107_mRNA_45.1.C.unshii_00957_mRNA_14.1    |                                 |
| GF0004969 | 1                             | 3                        | 0                            | Hypothetical protein (4)                                                                                                                          |                                                                                                                                                                                                                                                            |                                                                                                                                                                                                                                                                                                                                                                                                                                                                                                                                                                                                                                                                                                                                     | scaffold_9_mRNA_200.1            | C.unshii_01104_mRNA_9.1.C.unshii_01866_mRNA_7.1.C.unshii_01866_mRNA_9.1       |                                 |
| GF0004930 | 1                             | 3                        | 0                            | Hypothetical protein (4)                                                                                                                          |                                                                                                                                                                                                                                                            |                                                                                                                                                                                                                                                                                                                                                                                                                                                                                                                                                                                                                                                                                                                                     | scaffold_9_mRNA_1450.1           | C.unshii_00468_mRNA_5.1.C.unshii_00776_mRNA_11.1.C.unshii_01292_mRNA_6.1      |                                 |
| GF0004913 | 1                             | 3                        | 0                            | Hypothetical protein (4)                                                                                                                          |                                                                                                                                                                                                                                                            |                                                                                                                                                                                                                                                                                                                                                                                                                                                                                                                                                                                                                                                                                                                                     | scaffold_8_mRNA_966.1            | C.unshii_00094_mRNA_37.1.C.unshii_00122_mRNA_5.1.C.unshii_01451_mRNA_4.1      |                                 |
| GF0004897 | 1                             | 3                        | 0                            | Hypothetical protein (3); Peptidase aspartic, active site (1)                                                                                     | aspartic-type endopeptidase activity [GO:0004190 molecular_function] (2); proteolysis [GO:0006508 biological_process] (2)                                                                                                                                  | Retroviral aspartyl protease [IPR013242] (2); Aspartic peptidase domain [IPR021192] (2); Retrotransposon gag domain [IPR005162] (2); Aspartic peptidase, active site [IPR001969] (2); Chromo domain [IPR023780] (1); Chromo domain-like [IPR016197] (1)                                                                                                                                                                                                                                                                                                                                                                                                                                                                             | scaffold_8_mRNA_757.1            | C.unshii_00061_mRNA_59.1.C.unshii_00706_mRNA_4.1.C.unshii_01741_mRNA_1.1      |                                 |
| GF0004808 | 1                             | 3                        | 0                            | Kiwiflin (4)                                                                                                                                      |                                                                                                                                                                                                                                                            | RlpA-like double-psi beta-barrel domain [IPR009009] (3); RlpA-like protein, double-psi beta-barrel domain [IPR009009] (1)                                                                                                                                                                                                                                                                                                                                                                                                                                                                                                                                                                                                           | scaffold_8_mRNA_2743.1           | C.unshii_00458_mRNA_26.1.C.unshii_00806_mRNA_14.1.C.unshii_02581_mRNA_3.1     |                                 |
| GF0004706 | 1                             | 3                        | 0                            | Hypothetical protein (4)                                                                                                                          |                                                                                                                                                                                                                                                            |                                                                                                                                                                                                                                                                                                                                                                                                                                                                                                                                                                                                                                                                                                                                     | scaffold_8_mRNA_1684.1           | C.unshii_00373_mRNA_30.1.C.unshii_01134_mRNA_1.1.C.unshii_01665_mRNA_6.1      |                                 |
| GF0004702 | 1                             | 3                        | 0                            | Hypothetical protein (4)                                                                                                                          |                                                                                                                                                                                                                                                            |                                                                                                                                                                                                                                                                                                                                                                                                                                                                                                                                                                                                                                                                                                                                     | scaffold_8_mRNA_1589.1           | C.unshii_00480_mRNA_13.1.C.unshii_01336_mRNA_11.1.C.unshii_01407_mRNA_15.1    |                                 |
| GF0004680 | 1                             | 3                        | 0                            | Hypothetical protein (2); Ribonuclease H-like superfamily protein (3); Polynucleotidyl transferase, Ribonuclease H fold (1)                       | nucleic acid binding [GO:0003676 molecular_function] (4); zinc ion binding [GO:0008270 molecular_function] (1)                                                                                                                                             | Reverse transcriptase zinc-binding domain [IPR025960] (4); Ribonuclease H-like domain [IPR012337] (4); Endonuclease/exonuclease/phosphatase [IPR005135] (2); Domain of unknown function DUF4219 [IPR025314] (1); Zinc knuckle CX2CX4HX4C [IPR025836] (1); Zinc finger, CCHC-type [IPR001878] (1)                                                                                                                                                                                                                                                                                                                                                                                                                                    | scaffold_8_mRNA_1295.1           | C.unshii_00004_mRNA_109.1.C.unshii_u_00006_mRNA_120.1.C.unshii_01309_mRNA_8.1 |                                 |





| ID        | Num in <i>C. clementinae</i> | Num in <i>C. unshiu</i> | Num in <i>P. trifoliata</i> | Note                                                           | GO                                                                                                        | InterPro                                                                                                              | Members in <i>C. clementinae</i> | Members in <i>C. unshiu</i>                                                                            | Members in <i>P. trifoliata</i> |
|-----------|------------------------------|-------------------------|-----------------------------|----------------------------------------------------------------|-----------------------------------------------------------------------------------------------------------|-----------------------------------------------------------------------------------------------------------------------|----------------------------------|--------------------------------------------------------------------------------------------------------|---------------------------------|
| GF0002070 | 1                            | 4                       | 0                           | Hypothetical protein (3); Selenoprotein (2)                    |                                                                                                           | Thioredoxin-like fold [IPR012336] (5);<br>Sep15/ScM redox [IPR014912] (4);<br>Selenoprotein Sep15/ScM [IPR014912] (1) | scaffold_3_mRNA_4346.1           | C. unshiu_00054_mRNA_53.1.C. unshiu_00787_mRNA_15.1.C. unshiu_00787_mRNA_2.1.C. unshiu_00787_mRNA_6.1  |                                 |
| GF0002061 | 1                            | 4                       | 0                           | Hypothetical protein (3); Monosaccharide transport protein (2) |                                                                                                           |                                                                                                                       | scaffold_3_mRNA_3939.1           | C. unshiu_00022_mRNA_40.1.C. unshiu_00101_mRNA_44.1.C. unshiu_01265_mRNA_12.1.C. unshiu_02081_mRNA_1.1 |                                 |
| GF0001759 | 1                            | 4                       | 0                           | Ac-like transposase (4); Hypothetical protein (1)              | DNA binding [GO:0003677] molecular_function (4); nucleic acid binding [GO:0003676] molecular_function (4) | Ribonuclease H-like domain [IPR012337] (4); hAT-like transposase, RNase-H fold [IPR025525] (4)                        | scaffold_1_mRNA_1878.1           | C. unshiu_00009_mRNA_98.1.C. unshiu_00697_mRNA_7.1.C. unshiu_01906_mRNA_1.1.C. unshiu_02105_mRNA_3.1   |                                 |
