# Supplementary material for: Mikan Genome Database (MiGD): integrated database of genome annotation, genomic diversity, and CAPS marker information for mandarin molecular breeding
Source: PubMed Central journal article supplement — Breed Sci. 2020 Mar 5;70(2):200–11. doi: 10.1270/jsbbs.19097 (PMC7272249; doi:10.1270/jsbbs.19097), 2020-03-05
Supplement: 70_200_s8.pdf [file 70_200_s8.pdf]

Supplemental Table 7. Significantly enriched/depleted GO terms in *P. trifoliata* specific genes

| GO ID                           | GO Name                                                | GO Category        | P. trifoliata specific genes |        | Other genes |        | Ratio in P. trifoliata specific genes | Ratio in other genes | P-value    | FDR        |
|---------------------------------|--------------------------------------------------------|--------------------|------------------------------|--------|-------------|--------|---------------------------------------|----------------------|------------|------------|
|                                 |                                                        |                    | w/ GO                        | w/o GO | w/ GO       | w/o GO |                                       |                      |            |            |
| <b>Enriched (FDR &lt; 0.05)</b> |                                                        |                    |                              |        |             |        |                                       |                      |            |            |
| None                            |                                                        |                    |                              |        |             |        |                                       |                      |            |            |
| <b>Depleted (FDR &lt; 0.05)</b> |                                                        |                    |                              |        |             |        |                                       |                      |            |            |
| GO:0005515                      | protein binding                                        | molecular_function | 286                          | 8,091  | 2,823       | 23,133 | 0.0341                                | 0.1088               | 1.25.E-113 | 2.38.E-110 |
| GO:0003677                      | DNA binding                                            | molecular_function | 94                           | 8,283  | 1,123       | 24,833 | 0.0112                                | 0.0433               | 1.79.E-53  | 1.71.E-50  |
| GO:0005524                      | ATP binding                                            | molecular_function | 176                          | 8,201  | 1,536       | 24,420 | 0.0210                                | 0.0592               | 4.51.E-52  | 2.87.E-49  |
| GO:0005634                      | nucleus                                                | cellular_component | 22                           | 8,355  | 470         | 25,486 | 0.0026                                | 0.0181               | 2.85.E-33  | 1.36.E-30  |
| GO:0003824                      | catalytic activity                                     | molecular_function | 72                           | 8,305  | 744         | 25,212 | 0.0086                                | 0.0287               | 5.53.E-31  | 2.12.E-28  |
| GO:0008270                      | zinc ion binding                                       | molecular_function | 145                          | 8,232  | 1,092       | 24,864 | 0.0173                                | 0.0421               | 7.67.E-30  | 2.44.E-27  |
| GO:0016020                      | membrane                                               | cellular_component | 87                           | 8,290  | 808         | 25,148 | 0.0104                                | 0.0311               | 9.79.E-30  | 2.67.E-27  |
| GO:0006355                      | regulation of transcription, DNA-templated             | biological_process | 86                           | 8,291  | 800         | 25,156 | 0.0103                                | 0.0308               | 1.99.E-29  | 4.76.E-27  |
| GO:0016021                      | integral component of membrane                         | cellular_component | 73                           | 8,304  | 719         | 25,237 | 0.0087                                | 0.0277               | 2.03.E-28  | 4.32.E-26  |
| GO:0004672                      | protein kinase activity                                | molecular_function | 122                          | 8,255  | 878         | 25,078 | 0.0146                                | 0.0338               | 1.57.E-22  | 2.73.E-20  |
| GO:0006468                      | protein phosphorylation                                | biological_process | 122                          | 8,255  | 878         | 25,078 | 0.0146                                | 0.0338               | 1.57.E-22  | 2.73.E-20  |
| GO:0003700                      | DNA-binding transcription factor activity              | molecular_function | 19                           | 8,358  | 337         | 25,619 | 0.0023                                | 0.0130               | 5.76.E-22  | 9.18.E-20  |
| GO:0055085                      | transmembrane transport                                | biological_process | 38                           | 8,339  | 417         | 25,539 | 0.0045                                | 0.0161               | 6.29.E-19  | 9.24.E-17  |
| GO:0046872                      | metal ion binding                                      | molecular_function | 34                           | 8,343  | 391         | 25,565 | 0.0041                                | 0.0151               | 1.40.E-18  | 1.91.E-16  |
| GO:0043565                      | sequence-specific DNA binding                          | molecular_function | 7                            | 8,370  | 200         | 25,756 | 0.0008                                | 0.0077               | 1.48.E-16  | 1.89.E-14  |
| GO:0008152                      | metabolic process                                      | biological_process | 99                           | 8,278  | 664         | 25,292 | 0.0118                                | 0.0256               | 2.70.E-15  | 3.22.E-13  |
| GO:0000166                      | nucleotide binding                                     | molecular_function | 29                           | 8,348  | 313         | 25,643 | 0.0035                                | 0.0121               | 3.09.E-14  | 3.47.E-12  |
| GO:0005488                      | binding                                                | molecular_function | 24                           | 8,353  | 284         | 25,672 | 0.0029                                | 0.0109               | 4.56.E-14  | 4.85.E-12  |
| GO:0005737                      | cytoplasm                                              | cellular_component | 12                           | 8,365  | 209         | 25,747 | 0.0014                                | 0.0081               | 6.30.E-14  | 6.34.E-12  |
| GO:0016491                      | oxidoreductase activity                                | molecular_function | 97                           | 8,280  | 632         | 25,324 | 0.0116                                | 0.0243               | 8.27.E-14  | 7.90.E-12  |
| GO:0003723                      | RNA binding                                            | molecular_function | 21                           | 8,356  | 242         | 25,714 | 0.0025                                | 0.0093               | 5.54.E-12  | 5.04.E-10  |
| GO:0005975                      | carbohydrate metabolic process                         | biological_process | 49                           | 8,328  | 384         | 25,572 | 0.0058                                | 0.0148               | 8.33.E-12  | 7.23.E-10  |
| GO:0006886                      | intracellular protein transport                        | biological_process | 6                            | 8,371  | 145         | 25,811 | 0.0007                                | 0.0056               | 1.32.E-11  | 1.09.E-09  |
| GO:0005509                      | calcium ion binding                                    | molecular_function | 15                           | 8,362  | 195         | 25,761 | 0.0018                                | 0.0075               | 8.17.E-11  | 6.50.E-09  |
| GO:0006810                      | transport                                              | biological_process | 26                           | 8,351  | 241         | 25,715 | 0.0031                                | 0.0093               | 1.15.E-09  | 8.82.E-08  |
| GO:0005215                      | transporter activity                                   | molecular_function | 17                           | 8,360  | 185         | 25,771 | 0.0020                                | 0.0071               | 7.89.E-09  | 5.80.E-07  |
| GO:0055114                      | oxidation-reduction process                            | biological_process | 238                          | 8,139  | 1,081       | 24,875 | 0.0284                                | 0.0416               | 1.76.E-08  | 1.24.E-06  |
| GO:0016788                      | hydrolase activity, acting on ester bonds              | molecular_function | 2                            | 8,375  | 85          | 25,871 | 0.0002                                | 0.0033               | 2.14.E-08  | 1.46.E-06  |
| GO:0016787                      | hydrolase activity                                     | molecular_function | 25                           | 8,352  | 218         | 25,738 | 0.0030                                | 0.0084               | 3.05.E-08  | 2.01.E-06  |
| GO:0006351                      | transcription, DNA-templated                           | biological_process | 6                            | 8,371  | 109         | 25,847 | 0.0007                                | 0.0042               | 8.05.E-08  | 5.13.E-06  |
| GO:0003676                      | nucleic acid binding                                   | molecular_function | 272                          | 8,105  | 1,183       | 24,773 | 0.0325                                | 0.0456               | 1.29.E-07  | 7.73.E-06  |
| GO:0004553                      | hydrolase activity, hydrolyzing O-glycosyl compounds   | molecular_function | 28                           | 8,349  | 224         | 25,732 | 0.0033                                | 0.0086               | 1.30.E-07  | 7.73.E-06  |
| GO:0016192                      | vesicle-mediated transport                             | biological_process | 2                            | 8,375  | 74          | 25,882 | 0.0002                                | 0.0029               | 2.95.E-07  | 1.71.E-05  |
| GO:0006511                      | ubiquitin-dependent protein catabolic process          | biological_process | 2                            | 8,375  | 71          | 25,885 | 0.0002                                | 0.0027               | 7.26.E-07  | 4.08.E-05  |
| GO:0009058                      | biosynthetic process                                   | biological_process | 7                            | 8,370  | 104         | 25,852 | 0.0008                                | 0.0040               | 1.10.E-06  | 5.98.E-05  |
| GO:0046983                      | protein dimerization activity                          | molecular_function | 58                           | 8,319  | 338         | 25,618 | 0.0069                                | 0.0130               | 2.21.E-06  | 1.17.E-04  |
| GO:0045454                      | cell redox homeostasis                                 | biological_process | 5                            | 8,372  | 88          | 25,868 | 0.0006                                | 0.0034               | 2.38.E-06  | 1.23.E-04  |
| GO:0008017                      | microtubule binding                                    | molecular_function | 2                            | 8,375  | 65          | 25,891 | 0.0002                                | 0.0025               | 2.66.E-06  | 1.34.E-04  |
| GO:0030246                      | carbohydrate binding                                   | molecular_function | 7                            | 8,370  | 96          | 25,860 | 0.0008                                | 0.0037               | 4.84.E-06  | 2.37.E-04  |
| GO:0005622                      | intracellular                                          | cellular_component | 50                           | 8,327  | 292         | 25,664 | 0.0060                                | 0.0112               | 1.13.E-05  | 5.41.E-04  |
| GO:0030001                      | metal ion transport                                    | biological_process | 4                            | 8,373  | 73          | 25,883 | 0.0005                                | 0.0028               | 1.32.E-05  | 6.02.E-04  |
| GO:0030170                      | pyridoxal phosphate binding                            | molecular_function | 4                            | 8,373  | 73          | 25,883 | 0.0005                                | 0.0028               | 1.32.E-05  | 6.02.E-04  |
| GO:0004842                      | ubiquitin-protein transferase activity                 | molecular_function | 7                            | 8,370  | 91          | 25,865 | 0.0008                                | 0.0035               | 1.53.E-05  | 6.78.E-04  |
| GO:0006281                      | DNA repair                                             | biological_process | 106                          | 8,367  | 106         | 25,850 | 0.0012                                | 0.0041               | 1.84.E-05  | 7.84.E-04  |
| GO:0015031                      | protein transport                                      | biological_process | 9                            | 8,368  | 102         | 25,854 | 0.0011                                | 0.0039               | 1.85.E-05  | 7.84.E-04  |
| GO:0046982                      | protein heterodimerization activity                    | molecular_function | 2                            | 8,375  | 54          | 25,902 | 0.0002                                | 0.0021               | 5.81.E-05  | 2.41.E-03  |
| GO:0016567                      | protein ubiquitination                                 | biological_process | 7                            | 8,370  | 83          | 25,873 | 0.0008                                | 0.0032               | 6.64.E-05  | 2.70.E-03  |
| GO:0006457                      | protein folding                                        | biological_process | 13                           | 8,364  | 114         | 25,842 | 0.0016                                | 0.0044               | 7.13.E-05  | 2.84.E-03  |
| GO:0006629                      | lipid metabolic process                                | biological_process | 10                           | 8,367  | 99          | 25,857 | 0.0012                                | 0.0038               | 7.44.E-05  | 2.90.E-03  |
| GO:0005525                      | GTP binding                                            | molecular_function | 28                           | 8,349  | 181         | 25,775 | 0.0033                                | 0.0070               | 9.77.E-05  | 3.74.E-03  |
| GO:0015299                      | solute:proton antiporter activity                      | molecular_function | 1                            | 8,376  | 43          | 25,913 | 0.0001                                | 0.0017               | 1.31.E-04  | 4.90.E-03  |
| GO:0016887                      | ATPase activity                                        | molecular_function | 14                           | 8,363  | 115         | 25,841 | 0.0017                                | 0.0044               | 1.84.E-04  | 6.75.E-03  |
| GO:0003924                      | GTPase activity                                        | molecular_function | 13                           | 8,364  | 109         | 25,847 | 0.0016                                | 0.0042               | 1.88.E-04  | 6.77.E-03  |
| GO:0004252                      | serine-type endopeptidase activity                     | molecular_function | 7                            | 8,370  | 79          | 25,877 | 0.0008                                | 0.0030               | 2.07.E-04  | 7.34.E-03  |
| GO:0006396                      | RNA processing                                         | biological_process | 66                           | 8,372  | 66          | 25,890 | 0.0006                                | 0.0025               | 2.49.E-04  | 8.51.E-03  |
| GO:0006812                      | cation transport                                       | biological_process | 5                            | 8,372  | 66          | 25,890 | 0.0006                                | 0.0025               | 2.49.E-04  | 8.51.E-03  |
| GO:0050660                      | flavin adenine dinucleotide binding                    | molecular_function | 8                            | 8,369  | 82          | 25,874 | 0.0010                                | 0.0032               | 2.97.E-04  | 9.94.E-03  |
| GO:0016773                      | phosphotransferase activity, alcohol group as acceptor | molecular_function | 2                            | 8,375  | 46          | 25,910 | 0.0002                                | 0.0018               | 3.06.E-04  | 1.01.E-02  |
| GO:0000160                      | phosphorelay signal transduction system                | biological_process | 3                            | 8,374  | 51          | 25,905 | 0.0004                                | 0.0020               | 4.02.E-04  | 1.26.E-02  |
| GO:0003777                      | microtubule motor activity                             | molecular_function | 3                            | 8,374  | 51          | 25,905 | 0.0004                                | 0.0020               | 4.02.E-04  | 1.26.E-02  |
| GO:0007018                      | microtubule-based movement                             | biological_process | 3                            | 8,374  | 51          | 25,905 | 0.0004                                | 0.0020               | 4.02.E-04  | 1.26.E-02  |
| GO:0006470                      | protein dephosphorylation                              | biological_process | 8                            | 8,369  | 79          | 25,877 | 0.0010                                | 0.0030               | 4.12.E-04  | 1.27.E-02  |
| GO:0043169                      | cation binding                                         | molecular_function | 2                            | 8,375  | 45          | 25,911 | 0.0002                                | 0.0017               | 4.79.E-04  | 1.45.E-02  |
| GO:0016791                      | phosphatase activity                                   | molecular_function | 1                            | 8,376  | 37          | 25,919 | 0.0001                                | 0.0014               | 4.85.E-04  | 1.45.E-02  |
| GO:0008565                      | obsolete protein transporter activity                  | molecular_function | 0                            | 8,377  | 26          | 25,930 | 0.0000                                | 0.0010               | 9.84.E-04  | 2.89.E-02  |
| GO:0016757                      | transferase activity, transferring glycosyl groups     | molecular_function | 4                            | 8,373  | 53          | 25,903 | 0.0005                                | 0.0020               | 1.03.E-03  | 2.94.E-02  |
| GO:0016579                      | protein deubiquitination                               | biological_process | 0                            | 8,377  | 27          | 25,929 | 0.0000                                | 0.0010               | 1.03.E-03  | 2.94.E-02  |
| GO:0009055                      | electron transfer activity                             | molecular_function | 15                           | 8,362  | 109         | 25,847 | 0.0018                                | 0.0042               | 1.05.E-03  | 2.95.E-02  |
| GO:0006412                      | translation                                            | biological_process | 41                           | 8,336  | 216         | 25,740 | 0.0049                                | 0.0083               | 1.28.E-03  | 3.54.E-02  |
| GO:0003899                      | DNA-directed 5'-3' RNA polymerase activity             | molecular_function | 3                            | 8,374  | 46          | 25,910 | 0.0004                                | 0.0018               | 1.33.E-03  | 3.54.E-02  |
| GO:0004812                      | aminoacyl-tRNA ligase activity                         | molecular_function | 3                            | 8,374  | 46          | 25,910 | 0.0004                                | 0.0018               | 1.33.E-03  | 3.54.E-02  |
| GO:0006418                      | tRNA aminoacylation for protein translation            | biological_process | 3                            | 8,374  | 46          | 25,910 | 0.0004                                | 0.0018               | 1.33.E-03  | 3.54.E-02  |
| GO:0007165                      | signal transduction                                    | biological_process | 29                           | 8,348  | 166         | 25,790 | 0.0035                                | 0.0064               | 1.42.E-03  | 3.72.E-02  |
| GO:0008289                      | lipid binding                                          | molecular_function | 4                            | 8,373  | 52          | 25,904 | 0.0005                                | 0.0020               | 1.52.E-03  | 3.94.E-02  |
| GO:0042546                      | cell wall biogenesis                                   | biological_process | 0                            | 8,377  | 24          | 25,932 | 0.0000                                | 0.0009               | 1.61.E-03  | 4.07.E-02  |
| GO:0036459                      | thiol-dependent ubiquitinyl hydrolase activity         | molecular_function | 0                            | 8,377  | 25          | 25,931 | 0.0000                                | 0.0010               | 1.62.E-03  | 4.07.E-02  |
| GO:0003735                      | structural constituent of ribosome                     | molecular_function | 41                           | 8,336  | 212         | 25,744 | 0.0049                                | 0.0082               | 1.96.E-03  | 4.86.E-02  |
