# Supplementary material for: Mikan Genome Database (MiGD): integrated database of genome annotation, genomic diversity, and CAPS marker information for mandarin molecular breeding
Source: PubMed Central journal article supplement — Breed Sci. 2020 Mar 5;70(2):200–11. doi: 10.1270/jsbbs.19097 (PMC7272249; doi:10.1270/jsbbs.19097), 2020-03-05
Supplement: 70_200_s9.pdf [file 70_200_s9.pdf]

Supplemental Table 8. Significantly enriched/depleted InterPro domains in *P. trifoliata* specific genes

| InterPro ID                     | InterPro Name                                              | <i>P. trifoliata</i> specific genes |              | Other genes |              | Ratio in <i>P. trifoliata</i> specific genes | Ratio in other genes | P-value   | FDR       |
|---------------------------------|------------------------------------------------------------|-------------------------------------|--------------|-------------|--------------|----------------------------------------------|----------------------|-----------|-----------|
|                                 |                                                            | w/ InterPro                         | w/o InterPro | w/ InterPro | w/o InterPro |                                              |                      |           |           |
| <b>Enriched (FDR &lt; 0.05)</b> |                                                            |                                     |              |             |              |                                              |                      |           |           |
| IPR028919                       | Viral movement protein                                     | 44                                  | 8,333        | 63          | 25,893       | 0.0053                                       | 0.0024               | 1.61.E-04 | 1.17.E-02 |
| <b>Depleted (FDR &lt; 0.05)</b> |                                                            |                                     |              |             |              |                                              |                      |           |           |
| IPR011990                       | Tetratricopeptide-like helical domain superfamily          | 18                                  | 8,359        | 488         | 25,468       | 0.0021                                       | 0.0188               | 2.74.E-38 | 1.76.E-34 |
| IPR013083                       | Zinc finger, RING/FYVE/PHD-type                            | 20                                  | 8,357        | 464         | 25,492       | 0.0024                                       | 0.0179               | 3.51.E-34 | 1.13.E-30 |
| IPR017441                       | Protein kinase, ATP binding site                           | 43                                  | 8,334        | 533         | 25,423       | 0.0051                                       | 0.0205               | 1.24.E-26 | 2.65.E-23 |
| IPR000719                       | Protein kinase domain                                      | 112                                 | 8,265        | 858         | 25,098       | 0.0134                                       | 0.0331               | 3.01.E-24 | 3.86.E-21 |
| IPR001841                       | Zinc finger, RING-type                                     | 10                                  | 8,367        | 293         | 25,663       | 0.0012                                       | 0.0113               | 4.44.E-24 | 4.74.E-21 |
| IPR008271                       | Serine/threonine-protein kinase, active site               | 61                                  | 8,316        | 599         | 25,357       | 0.0073                                       | 0.0231               | 9.90.E-24 | 9.07.E-21 |
| IPR011009                       | Protein kinase-like domain superfamily                     | 138                                 | 8,239        | 963         | 24,993       | 0.0165                                       | 0.0371               | 2.98.E-23 | 2.39.E-20 |
| IPR009057                       | Homeobox-like domain superfamily                           | 13                                  | 8,364        | 306         | 25,650       | 0.0016                                       | 0.0118               | 4.56.E-23 | 3.25.E-20 |
| IPR027417                       | P-loop containing nucleoside triphosphate hydrolase        | 175                                 | 8,202        | 1,074       | 24,882       | 0.0209                                       | 0.0414               | 3.96.E-20 | 2.54.E-17 |
| IPR001005                       | SANT/Myb domain                                            | 7                                   | 8,370        | 200         | 25,756       | 0.0008                                       | 0.0077               | 1.48.E-16 | 8.64.E-14 |
| IPR001810                       | F-box domain                                               | 20                                  | 8,357        | 283         | 25,673       | 0.0024                                       | 0.0109               | 4.74.E-16 | 2.53.E-13 |
| IPR015943                       | WD40/YVTN repeat-like-containing domain superfamily        | 15                                  | 8,362        | 243         | 25,713       | 0.0018                                       | 0.0094               | 2.53.E-15 | 1.25.E-12 |
| IPR013320                       | Concanavalin A-like lectin/glucanase domain superfamily    | 54                                  | 8,323        | 456         | 25,500       | 0.0064                                       | 0.0176               | 2.98.E-15 | 1.36.E-12 |
| IPR017986                       | WD40-repeat-containing domain                              | 13                                  | 8,364        | 229         | 25,727       | 0.0016                                       | 0.0088               | 3.39.E-15 | 1.45.E-12 |
| IPR002885                       | Pentatricopeptide repeat                                   | 50                                  | 8,327        | 432         | 25,524       | 0.0060                                       | 0.0166               | 4.52.E-15 | 1.81.E-12 |
| IPR003593                       | AAA+ ATPase domain                                         | 16                                  | 8,361        | 241         | 25,715       | 0.0019                                       | 0.0093               | 1.50.E-14 | 5.66.E-12 |
| IPR001680                       | WD40 repeat                                                | 11                                  | 8,366        | 206         | 25,750       | 0.0013                                       | 0.0079               | 3.20.E-14 | 1.14.E-11 |
| IPR017930                       | Myb domain                                                 | 4                                   | 8,373        | 153         | 25,803       | 0.0005                                       | 0.0059               | 3.77.E-14 | 1.27.E-11 |
| IPR016024                       | Armadillo-type fold                                        | 24                                  | 8,353        | 284         | 25,672       | 0.0029                                       | 0.0109               | 4.56.E-14 | 1.46.E-11 |
| IPR012677                       | Nucleotide-binding alpha-beta plait domain superfamily     | 13                                  | 8,364        | 201         | 25,755       | 0.0016                                       | 0.0077               | 1.92.E-12 | 5.87.E-10 |
| IPR011989                       | Armadillo-like helical                                     | 18                                  | 8,359        | 228         | 25,728       | 0.0021                                       | 0.0088               | 2.88.E-12 | 8.40.E-10 |
| IPR000504                       | RNA recognition motif domain                               | 11                                  | 8,366        | 177         | 25,779       | 0.0013                                       | 0.0068               | 1.90.E-11 | 5.29.E-09 |
| IPR019775                       | WD40 repeat, conserved site                                | 4                                   | 8,373        | 125         | 25,831       | 0.0005                                       | 0.0048               | 4.13.E-11 | 1.06.E-08 |
| IPR011992                       | EF-hand domain pair                                        | 9                                   | 8,368        | 154         | 25,802       | 0.0011                                       | 0.0059               | 1.87.E-10 | 4.62.E-08 |
| IPR011011                       | Zinc finger, FYVE/PHD-type                                 | 1                                   | 8,376        | 91          | 25,865       | 0.0001                                       | 0.0035               | 3.77.E-10 | 8.95.E-08 |
| IPR001356                       | Homeobox domain                                            | 0                                   | 8,377        | 73          | 25,883       | 0.0000                                       | 0.0028               | 2.85.E-09 | 6.54.E-07 |
| IPR018247                       | EF-Hand 1, calcium-binding site                            | 8                                   | 8,369        | 135         | 25,821       | 0.0010                                       | 0.0052               | 3.54.E-09 | 7.83.E-07 |
| IPR029044                       | Nucleotide-diphospho-sugar transferases                    | 5                                   | 8,372        | 114         | 25,842       | 0.0006                                       | 0.0044               | 4.90.E-09 | 1.05.E-06 |
| IPR019734                       | Tetratricopeptide repeat                                   | 4                                   | 8,373        | 103         | 25,853       | 0.0005                                       | 0.0040               | 1.12.E-08 | 2.25.E-06 |
| IPR003591                       | Leucine-rich repeat, typical subtype                       | 40                                  | 8,337        | 294         | 25,662       | 0.0048                                       | 0.0113               | 1.85.E-08 | 3.60.E-06 |
| IPR001965                       | Zinc finger, PHD-type                                      | 1                                   | 8,376        | 76          | 25,880       | 0.0001                                       | 0.0029               | 2.47.E-08 | 4.65.E-06 |
| IPR019786                       | Zinc finger, PHD-type, conserved site                      | 0                                   | 8,377        | 64          | 25,892       | 0.0000                                       | 0.0025               | 2.84.E-08 | 5.21.E-06 |
| IPR001245                       | Serine-threonine/tyrosine-protein kinase, catalytic domain | 47                                  | 8,330        | 317         | 25,639       | 0.0056                                       | 0.0122               | 5.42.E-08 | 9.66.E-06 |
| IPR023214                       | HAD superfamily                                            | 11                                  | 8,366        | 138         | 25,818       | 0.0013                                       | 0.0053               | 8.67.E-08 | 1.50.E-05 |
| IPR012340                       | Nucleic acid-binding, OB-fold                              | 3                                   | 8,374        | 87          | 25,869       | 0.0004                                       | 0.0034               | 9.11.E-08 | 1.50.E-05 |
| IPR013026                       | Tetratricopeptide repeat-containing domain                 | 5                                   | 8,372        | 102         | 25,854       | 0.0006                                       | 0.0039               | 9.14.E-08 | 1.50.E-05 |
| IPR011333                       | SKPI/BTB/POZ domain superfamily                            | 1                                   | 8,376        | 68          | 25,888       | 0.0001                                       | 0.0026               | 1.41.E-07 | 2.26.E-05 |
| IPR017853                       | Glycoside hydrolase superfamily                            | 22                                  | 8,355        | 193         | 25,763       | 0.0026                                       | 0.0074               | 1.65.E-07 | 2.58.E-05 |
| IPR020846                       | Major facilitator superfamily domain                       | 20                                  | 8,357        | 184         | 25,772       | 0.0024                                       | 0.0071               | 1.75.E-07 | 2.66.E-05 |
| IPR016177                       | DNA-binding domain superfamily                             | 8                                   | 8,369        | 117         | 25,839       | 0.0010                                       | 0.0045               | 1.78.E-07 | 2.66.E-05 |
| IPR006447                       | Myb domain, plants                                         | 0                                   | 8,377        | 57          | 25,899       | 0.0000                                       | 0.0022               | 1.87.E-07 | 2.72.E-05 |
| IPR017451                       | F-box associated interaction domain                        | 4                                   | 8,373        | 91          | 25,865       | 0.0005                                       | 0.0035               | 2.18.E-07 | 3.11.E-05 |
| IPR002048                       | EF-hand domain                                             | 12                                  | 8,365        | 137         | 25,819       | 0.0014                                       | 0.0053               | 4.15.E-07 | 5.78.E-05 |
| IPR001087                       | GDSL lipase/esterase                                       | 1                                   | 8,376        | 64          | 25,892       | 0.0001                                       | 0.0025               | 6.00.E-07 | 8.19.E-05 |
| IPR013210                       | Leucine-rich repeat-containing N-terminal, plant-type      | 42                                  | 8,335        | 278         | 25,678       | 0.0050                                       | 0.0107               | 7.69.E-07 | 1.03.E-04 |
| IPR001650                       | Helicase, C-terminal                                       | 8                                   | 8,369        | 111         | 25,845       | 0.0010                                       | 0.0043               | 8.66.E-07 | 1.13.E-04 |
| IPR014001                       | Helicase superfamily 1/2, ATP-binding domain               | 9                                   | 8,368        | 116         | 25,840       | 0.0011                                       | 0.0045               | 9.64.E-07 | 1.24.E-04 |
| IPR013087                       | Zinc finger C2H2-type                                      | 0                                   | 8,377        | 50          | 25,906       | 0.0000                                       | 0.0019               | 1.24.E-06 | 1.56.E-04 |
| IPR020568                       | Ribosomal protein S5 domain 2-type fold                    | 0                                   | 8,377        | 51          | 25,905       | 0.0000                                       | 0.0020               | 1.35.E-06 | 1.67.E-04 |
| IPR011598                       | Myc-type, basic helix-loop-helix (bHLH) domain             | 11                                  | 8,366        | 125         | 25,831       | 0.0013                                       | 0.0048               | 1.68.E-06 | 2.03.E-04 |
| IPR020472                       | G-protein beta WD-40 repeat                                | 2                                   | 8,375        | 67          | 25,889       | 0.0002                                       | 0.0026               | 1.71.E-06 | 2.03.E-04 |
| IPR017907                       | Zinc finger, RING-type, conserved site                     | 2                                   | 8,375        | 68          | 25,888       | 0.0002                                       | 0.0026               | 1.83.E-06 | 2.13.E-04 |
| IPR029058                       | Alpha/Beta hydrolase fold                                  | 43                                  | 8,334        | 274         | 25,682       | 0.0051                                       | 0.0106               | 1.98.E-06 | 2.27.E-04 |
| IPR000210                       | BTB/POZ domain                                             | 1                                   | 8,376        | 58          | 25,898       | 0.0001                                       | 0.0022               | 2.18.E-06 | 2.41.E-04 |
| IPR019787                       | Zinc finger, PHD-finger                                    | 1                                   | 8,376        | 58          | 25,898       | 0.0001                                       | 0.0022               | 2.18.E-06 | 2.41.E-04 |
| IPR016040                       | NAD(P)-binding domain                                      | 56                                  | 8,321        | 327         | 25,629       | 0.0067                                       | 0.0126               | 2.77.E-06 | 3.01.E-04 |
| IPR000008                       | C2 domain                                                  | 5                                   | 8,372        | 85          | 25,871       | 0.0006                                       | 0.0033               | 3.35.E-06 | 3.58.E-04 |
| IPR029071                       | Ubiquitin-like domain superfamily                          | 5                                   | 8,372        | 84          | 25,872       | 0.0006                                       | 0.0032               | 5.10.E-06 | 5.36.E-04 |
| IPR014729                       | Rossmann-like alpha/beta/alpha sandwich fold               | 8                                   | 8,369        | 101         | 25,855       | 0.0010                                       | 0.0039               | 5.44.E-06 | 5.63.E-04 |
| IPR013783                       | Immunoglobulin-like fold                                   | 0                                   | 8,377        | 44          | 25,912       | 0.0000                                       | 0.0017               | 8.77.E-06 | 8.78.E-04 |
| IPR001471                       | AP2/ERF domain                                             | 9                                   | 8,368        | 101         | 25,855       | 0.0011                                       | 0.0039               | 1.77.E-05 | 1.74.E-03 |
| IPR015421                       | Pyridoxal phosphate-dependent transferase, major domain    | 6                                   | 8,371        | 83          | 25,873       | 0.0007                                       | 0.0032               | 1.94.E-05 | 1.89.E-03 |
| IPR013766                       | Thioredoxin domain                                         | 1                                   | 8,376        | 50          | 25,906       | 0.0001                                       | 0.0019               | 2.18.E-05 | 2.09.E-03 |
| IPR000571                       | Zinc finger, CCCH-type                                     | 2                                   | 8,375        | 57          | 25,899       | 0.0002                                       | 0.0022               | 2.37.E-05 | 2.23.E-03 |
| IPR018253                       | DnaJ domain, conserved site                                | 1                                   | 8,376        | 48          | 25,908       | 0.0001                                       | 0.0018               | 3.35.E-05 | 3.11.E-03 |
| IPR017871                       | ABC transporter, conserved site                            | 3                                   | 8,374        | 62          | 25,894       | 0.0004                                       | 0.0024               | 3.40.E-05 | 3.11.E-03 |
| IPR000270                       | PB1 domain                                                 | 3                                   | 8,374        | 63          | 25,893       | 0.0004                                       | 0.0024               | 3.57.E-05 | 3.21.E-03 |

|           |                                                    |     |       |     |        |        |        |           |           |
|-----------|----------------------------------------------------|-----|-------|-----|--------|--------|--------|-----------|-----------|
| IPR004827 | Basic-leucine zipper domain                        | 2   | 8,375 | 55  | 25,901 | 0.0002 | 0.0021 | 3.61.E-05 | 3.21.E-03 |
| IPR006553 | Leucine-rich repeat, cysteine-containing subtype   | 0   | 8,377 | 39  | 25,917 | 0.0000 | 0.0015 | 3.70.E-05 | 3.25.E-03 |
| IPR006671 | Cyclin, N-terminal                                 | 0   | 8,377 | 37  | 25,919 | 0.0000 | 0.0014 | 5.75.E-05 | 4.90.E-03 |
| IPR025322 | Protein of unknown function DUF4228, plant         | 0   | 8,377 | 37  | 25,919 | 0.0000 | 0.0014 | 5.75.E-05 | 4.90.E-03 |
| IPR009072 | Histone-fold                                       | 2   | 8,375 | 54  | 25,902 | 0.0002 | 0.0021 | 5.81.E-05 | 4.90.E-03 |
| IPR023393 | START-like domain superfamily                      | 3   | 8,374 | 59  | 25,897 | 0.0004 | 0.0023 | 7.89.E-05 | 6.57.E-03 |
| IPR032867 | DYW domain                                         | 1   | 8,376 | 44  | 25,912 | 0.0001 | 0.0017 | 8.08.E-05 | 6.64.E-03 |
| IPR002035 | von Willebrand factor, type A                      | 0   | 8,377 | 35  | 25,921 | 0.0000 | 0.0013 | 9.06.E-05 | 7.35.E-03 |
| IPR011991 | ArsR-like helix-turn-helix domain                  | 30  | 8,347 | 191 | 25,765 | 0.0036 | 0.0074 | 1.05.E-04 | 8.45.E-03 |
| IPR029052 | Metallo-dependent phosphatase-like                 | 3   | 8,374 | 57  | 25,899 | 0.0004 | 0.0022 | 1.18.E-04 | 9.34.E-03 |
| IPR017877 | Myb-like domain                                    | 1   | 8,376 | 42  | 25,914 | 0.0001 | 0.0016 | 1.27.E-04 | 9.94.E-03 |
| IPR000048 | IQ motif, EF-hand binding site                     | 2   | 8,375 | 50  | 25,906 | 0.0002 | 0.0019 | 1.32.E-04 | 1.01.E-02 |
| IPR013763 | Cyclin-like                                        | 2   | 8,375 | 50  | 25,906 | 0.0002 | 0.0019 | 1.32.E-04 | 1.01.E-02 |
| IPR014721 | Ribosomal protein S5 domain 2-type fold, subgroup  | 0   | 8,377 | 33  | 25,923 | 0.0000 | 0.0013 | 1.45.E-04 | 1.09.E-02 |
| IPR009060 | UBA-like superfamily                               | 0   | 8,377 | 34  | 25,922 | 0.0000 | 0.0013 | 1.57.E-04 | 1.15.E-02 |
| IPR017970 | Homeobox, conserved site                           | 0   | 8,377 | 34  | 25,922 | 0.0000 | 0.0013 | 1.57.E-04 | 1.15.E-02 |
| IPR001623 | DnaJ domain                                        | 8   | 8,369 | 84  | 25,872 | 0.0010 | 0.0032 | 2.11.E-04 | 1.49.E-02 |
| IPR015424 | Pyridoxal phosphate-dependent transferase          | 8   | 8,369 | 84  | 25,872 | 0.0010 | 0.0032 | 2.11.E-04 | 1.49.E-02 |
| IPR001752 | Kinesin motor domain                               | 2   | 8,375 | 49  | 25,907 | 0.0002 | 0.0019 | 2.15.E-04 | 1.50.E-02 |
| IPR015422 | Pyridoxal phosphate-dependent transferase domain 1 | 4   | 8,373 | 61  | 25,895 | 0.0005 | 0.0024 | 2.21.E-04 | 1.52.E-02 |
| IPR000425 | Major intrinsic protein                            | 0   | 8,377 | 31  | 25,925 | 0.0000 | 0.0012 | 2.35.E-04 | 1.55.E-02 |
| IPR010920 | LSM domain superfamily                             | 0   | 8,377 | 31  | 25,925 | 0.0000 | 0.0012 | 2.35.E-04 | 1.55.E-02 |
| IPR011013 | Galactose mutarotase-like domain superfamily       | 0   | 8,377 | 31  | 25,925 | 0.0000 | 0.0012 | 2.35.E-04 | 1.55.E-02 |
| IPR023271 | Aquaporin-like                                     | 0   | 8,377 | 31  | 25,925 | 0.0000 | 0.0012 | 2.35.E-04 | 1.55.E-02 |
| IPR025110 | AMP-binding enzyme, C-terminal domain              | 0   | 8,377 | 32  | 25,924 | 0.0000 | 0.0012 | 2.43.E-04 | 1.59.E-02 |
| IPR004843 | Calcineurin-like phosphoesterase domain, ApaH type | 3   | 8,374 | 53  | 25,903 | 0.0004 | 0.0020 | 2.67.E-04 | 1.73.E-02 |
| IPR014756 | Immunoglobulin E-set                               | 2   | 8,375 | 46  | 25,910 | 0.0002 | 0.0018 | 3.06.E-04 | 1.96.E-02 |
| IPR003441 | NAC domain                                         | 19  | 8,358 | 135 | 25,821 | 0.0023 | 0.0052 | 3.12.E-04 | 1.98.E-02 |
| IPR008979 | Galactose-binding-like domain superfamily          | 2   | 8,375 | 47  | 25,909 | 0.0002 | 0.0018 | 3.20.E-04 | 1.99.E-02 |
| IPR032675 | Leucine-rich repeat domain superfamily             | 246 | 8,131 | 977 | 24,979 | 0.0294 | 0.0376 | 3.23.E-04 | 1.99.E-02 |
| IPR019793 | Peroxidases haem-ligand binding site               | 4   | 8,373 | 58  | 25,898 | 0.0005 | 0.0022 | 3.23.E-04 | 1.99.E-02 |
| IPR006153 | Cation/H <sup>+</sup> exchanger                    | 1   | 8,376 | 40  | 25,916 | 0.0001 | 0.0015 | 3.37.E-04 | 2.06.E-02 |
| IPR001611 | Leucine-rich repeat                                | 105 | 8,272 | 473 | 25,483 | 0.0125 | 0.0182 | 3.53.E-04 | 2.14.E-02 |
| IPR000225 | Armadillo                                          | 5   | 8,372 | 65  | 25,891 | 0.0006 | 0.0025 | 3.81.E-04 | 2.24.E-02 |
| IPR002347 | Short-chain dehydrogenase/reductase SDR            | 5   | 8,372 | 65  | 25,891 | 0.0006 | 0.0025 | 3.81.E-04 | 2.24.E-02 |
| IPR011701 | Major facilitator superfamily                      | 0   | 8,377 | 30  | 25,926 | 0.0000 | 0.0012 | 3.82.E-04 | 2.24.E-02 |
| IPR012336 | Thioredoxin-like fold                              | 27  | 8,350 | 168 | 25,788 | 0.0032 | 0.0065 | 4.08.E-04 | 2.38.E-02 |
| IPR005202 | Transcription factor GRAS                          | 1   | 8,376 | 37  | 25,919 | 0.0001 | 0.0014 | 4.85.E-04 | 2.80.E-02 |
| IPR000626 | Ubiquitin domain                                   | 3   | 8,374 | 50  | 25,906 | 0.0004 | 0.0019 | 6.02.E-04 | 3.39.E-02 |
| IPR027640 | Kinesin-like protein                               | 3   | 8,374 | 50  | 25,906 | 0.0004 | 0.0019 | 6.02.E-04 | 3.39.E-02 |
| IPR001440 | Tetratricopeptide repeat 1                         | 0   | 8,377 | 28  | 25,928 | 0.0000 | 0.0011 | 6.09.E-04 | 3.39.E-02 |
| IPR006073 | GTP binding domain                                 | 0   | 8,377 | 28  | 25,928 | 0.0000 | 0.0011 | 6.09.E-04 | 3.39.E-02 |
| IPR026992 | Non-haem dioxygenase N-terminal domain             | 13  | 8,364 | 102 | 25,854 | 0.0016 | 0.0039 | 6.62.E-04 | 3.62.E-02 |
| IPR006652 | Kelch repeat type 1                                | 0   | 8,377 | 29  | 25,927 | 0.0000 | 0.0011 | 6.67.E-04 | 3.62.E-02 |
| IPR025659 | Tubby-like, C-terminal                             | 0   | 8,377 | 29  | 25,927 | 0.0000 | 0.0011 | 6.67.E-04 | 3.62.E-02 |
| IPR006121 | Heavy metal-associated domain, HMA                 | 4   | 8,373 | 56  | 25,900 | 0.0005 | 0.0022 | 7.27.E-04 | 3.92.E-02 |
| IPR004088 | K Homology domain, type 1                          | 1   | 8,376 | 35  | 25,921 | 0.0001 | 0.0013 | 7.61.E-04 | 4.03.E-02 |
| IPR020845 | AMP-binding, conserved site                        | 1   | 8,376 | 35  | 25,921 | 0.0001 | 0.0013 | 7.61.E-04 | 4.03.E-02 |
| IPR004839 | Aminotransferase, class I/classII                  | 1   | 8,376 | 36  | 25,920 | 0.0001 | 0.0014 | 7.76.E-04 | 4.08.E-02 |
| IPR001932 | PPM-type phosphatase domain                        | 6   | 8,371 | 66  | 25,890 | 0.0007 | 0.0025 | 8.15.E-04 | 4.25.E-02 |
| IPR013785 | Aldolase-type TIM barrel                           | 9   | 8,368 | 82  | 25,874 | 0.0011 | 0.0032 | 8.27.E-04 | 4.27.E-02 |
| IPR003959 | ATPase, AAA-type, core                             | 13  | 8,364 | 99  | 25,857 | 0.0016 | 0.0038 | 8.93.E-04 | 4.58.E-02 |
| IPR003439 | ABC transporter-like                               | 12  | 8,365 | 94  | 25,862 | 0.0014 | 0.0036 | 9.54.E-04 | 4.86.E-02 |
| IPR001357 | BRCT domain                                        | 0   | 8,377 | 26  | 25,930 | 0.0000 | 0.0010 | 9.84.E-04 | 4.97.E-02 |
